# Supplementary material for: Differential ion dehydration energetics explains selectivity in the non-canonical lysosomal K+ channel TMEM175
Source: eLife journal article supplement (doi:10.7554/elife.75122), 2022-05-05
Supplement: fig5-data1 [file raw-data-Figure5-S4.xlsx]

## Sheet: I271V-CsNa
﻿Time (ms)	Im_scaled (pA)	Im_scaled (pA)	Im_scaled (pA)	Im_scaled (pA)	Im_scaled (pA)	Im_scaled (pA)	Im_scaled (pA)	Im_scaled (pA)	Im_scaled (pA)	Im_scaled (pA)	Im_scaled (pA)	10_Vm (mV)	10_Vm (mV)	10_Vm (mV)	10_Vm (mV)	10_Vm (mV)	10_Vm (µV)	10_Vm (mV)	10_Vm (mV)	10_Vm (mV)	10_Vm (mV)	10_Vm (mV)
0.1	3.90625	7.38525	7.32422	7.14111	6.22559	7.08008	6.7749	6.22559	6.10352	5.92041	5.67627	0.0305176	-0.0305176	0.0610352	-0.0305176	-0.0305176	-61.0352	-0.0610352	-0.0915527	0.0305176	0	0.0305176
0.2	3.84521	7.38525	7.32422	7.20215	6.16455	7.01904	6.83594	6.16455	6.04248	5.92041	5.67627	0	-0.0305176	0.0915527	-0.0610352	-0.0610352	0	-0.0305176	0	0.0305176	-0.0305176	0.0305176
0.3	3.90625	7.44629	7.38525	7.26318	6.16455	7.01904	6.7749	6.10352	6.04248	5.85937	5.7373	0.0610352	-0.0610352	0.0305176	0	-0.0305176	-30.5176	0.0305176	0	0	0.0610352	0.0305176
0.4	3.84521	7.50732	7.38525	7.26318	6.16455	6.95801	6.71387	6.04248	5.98144	5.7373	5.7373	0	0	0	-0.0610352	0	-30.5176	-0.0610352	-0.0305176	0	0.0915527	0
0.5	3.84521	7.50732	7.38525	7.26318	6.16455	6.95801	6.71387	6.04248	5.98144	5.7373	5.85937	-0.0305176	-0.0610352	0	-0.0610352	0.0305176	-30.5176	0	-0.0610352	-0.0610352	-0.0610352	-0.0305176
0.6	3.78418	7.50732	7.44629	7.26318	6.28662	6.89697	6.65283	5.98144	6.04248	5.7373	5.92041	-0.0610352	-0.0610352	0	0	0	-30.5176	-0.0610352	-0.0610352	-0.0305176	-0.0305176	0
0.7	3.84521	7.50732	7.38525	7.20215	6.34766	6.95801	6.65283	5.98144	6.04248	5.79834	5.92041	-0.0610352	0.0305176	0.0305176	0	-0.0610352	30.5176	0	-0.0915527	-0.0610352	-0.0610352	-0.0305176
0.8	3.84521	7.44629	7.38525	7.20215	6.34766	6.95801	6.5918	6.04248	5.98144	5.79834	5.85937	0	0.0305176	0.0305176	0	-0.0915527	-30.5176	0.0305176	0.0305176	0	0.0305176	0
0.9	3.84521	7.44629	7.38525	7.26318	6.40869	7.01904	6.5918	5.98144	5.98144	5.7373	5.79834	0.0305176	0	-0.0305176	0	-0.0610352	-91.5527	0	0	-0.0305176	0.0915527	0.0305176
1	3.84521	7.38525	7.38525	7.32422	6.40869	7.08008	6.65283	5.98144	5.98144	5.7373	5.7373	0	0	0.0305176	-0.0305176	0	-91.5527	-0.0610352	-0.0610352	-0.0305176	0.0305176	0.0305176
1.1	3.84521	7.38525	7.44629	7.32422	6.40869	7.14111	6.65283	6.04248	5.92041	5.7373	5.7373	-0.0305176	-0.0305176	0	-0.0610352	0	0	-0.0915527	-0.0610352	-0.0305176	-0.0305176	-0.0305176
1.2	3.84521	7.38525	7.50732	7.20215	6.46973	7.20215	6.71387	5.98144	5.92041	5.79834	5.7373	0	-0.0610352	0	-0.0610352	0	0	-0.0915527	-0.12207	-0.0305176	-0.0305176	-0.0915527
1.3	3.84521	7.44629	7.50732	7.14111	6.40869	7.14111	6.65283	5.98144	5.85937	5.92041	5.7373	0	-0.0305176	-0.0305176	-0.12207	-0.0305176	30.5176	-0.0305176	-0.0610352	0.0305176	0	-0.0305176
1.4	3.84521	7.50732	7.44629	7.14111	6.34766	7.01904	6.53076	5.98144	5.92041	5.98144	5.79834	0.0305176	0.0305176	0	-0.0305176	-0.0610352	0	-0.0305176	-0.0305176	-0.0305176	0.0305176	0.0305176
1.5	3.78418	7.50732	7.38525	7.20215	6.28662	6.95801	6.46973	5.98144	5.98144	5.98144	5.79834	0	0.0305176	-0.0305176	-0.0305176	-0.0305176	-30.5176	0	0	-0.0305176	0	0.0305176
1.6	3.78418	7.56836	7.32422	7.20215	6.22559	6.89697	6.46973	5.98144	6.10352	5.98144	5.79834	0	0	0.0305176	-0.0305176	-0.0610352	-152.588	-0.0305176	-0.0305176	0	-0.0305176	0.0305176
1.7	3.78418	7.62939	7.32422	7.20215	6.22559	6.95801	6.46973	5.98144	6.16455	5.92041	5.79834	0.0305176	0.0305176	0	0	-0.0305176	-61.0352	-0.0305176	-0.0305176	-0.0305176	-0.0305176	0
1.8	3.78418	7.69043	7.38525	7.20215	6.16455	7.01904	6.46973	5.98144	6.16455	5.85937	5.79834	0.0610352	0.0305176	0	0	-0.0610352	0	-0.0305176	-0.0915527	-0.0305176	0.0305176	-0.0305176
1.9	3.78418	7.75146	7.38525	7.14111	6.22559	7.08008	6.53076	5.98144	6.16455	5.79834	5.79834	0.0305176	-0.0305176	-0.0305176	-0.0305176	-0.0610352	0	-0.0305176	-0.0610352	0	0.0305176	-0.0305176
2	3.78418	7.75146	7.32422	7.20215	6.16455	7.08008	6.5918	5.98144	6.10352	5.7373	5.85937	0.0610352	-0.0610352	0	-0.0610352	0	0	0.0305176	-0.0305176	-0.0305176	0.0610352	0
2.1	3.78418	7.69043	7.32422	7.20215	6.16455	7.08008	6.65283	5.98144	6.10352	5.67627	5.79834	0	0	0	-0.0305176	0	0	0	-0.0305176	-0.0305176	0.0610352	-0.0305176
2.2	3.72314	7.62939	7.32422	7.26318	6.10352	7.01904	6.5918	5.98144	6.10352	5.67627	5.79834	-0.0305176	0	0.0305176	-0.0305176	0.0305176	0	-0.0305176	-0.0915527	-0.12207	0	0
2.3	3.66211	7.56836	7.32422	7.32422	6.10352	6.95801	6.5918	5.92041	6.10352	5.67627	5.7373	0	0	0.0915527	-0.0305176	0	-61.0352	-0.0305176	-0.0610352	-0.0610352	-0.0305176	0
2.4	3.66211	7.50732	7.32422	7.38525	6.10352	6.95801	6.5918	5.92041	6.04248	5.61523	5.67627	0	0	-0.0305176	-0.0305176	-0.0305176	-30.5176	0	-0.0305176	-0.0305176	0	0
2.5	3.66211	7.56836	7.26318	7.38525	6.10352	7.01904	6.5918	5.85937	6.04248	5.61523	5.61523	0	-0.0305176	-0.0305176	0	-0.0610352	30.5176	0	0	-0.0305176	0.0305176	-0.0305176
2.6	3.66211	7.56836	7.32422	7.38525	6.16455	7.08008	6.53076	5.79834	6.04248	5.61523	5.61523	0.0305176	0	0.0305176	0	-0.0305176	30.5176	-0.0305176	0.0305176	0	0.0610352	0.0305176
2.7	3.78418	7.62939	7.26318	7.38525	6.16455	7.14111	6.46973	5.7373	5.98144	5.7373	5.67627	-0.0305176	0	0	0.0305176	-0.0305176	-30.5176	-0.0305176	0.0305176	-0.0610352	0.0305176	0
2.8	3.84521	7.69043	7.32422	7.32422	6.16455	7.14111	6.40869	5.7373	5.98144	5.79834	5.67627	-0.0305176	0	-0.0305176	-0.0305176	-0.0305176	-30.5176	-0.0305176	-0.0305176	0	-0.0305176	-0.0305176
2.9	3.72314	7.62939	7.38525	7.26318	6.22559	7.26318	6.28662	5.7373	5.98144	5.79834	5.61523	-0.0305176	-0.0610352	0	-0.0305176	-0.0610352	0	-0.0305176	-0.0610352	0	0	-0.0305176
3	3.72314	7.50732	7.44629	7.32422	6.22559	7.32422	6.28662	5.79834	5.98144	5.79834	5.5542	0.0305176	-0.0305176	-0.0305176	-0.0305176	0	0	-0.0305176	-0.0610352	-0.0610352	0	0
3.1	3.66211	7.44629	7.38525	7.32422	6.34766	7.32422	6.28662	5.85937	5.98144	5.79834	5.49316	0	-0.0305176	0	0.0305176	0.0305176	-61.0352	-0.0305176	-0.0305176	-0.0305176	0	0.0610352
3.2	3.66211	7.44629	7.38525	7.32422	6.34766	7.38525	6.40869	5.92041	5.92041	5.7373	5.43213	0.0610352	-0.0610352	-0.0305176	-0.0305176	-0.0305176	-30.5176	-0.0305176	-0.0305176	-0.0305176	0	0
3.3	3.60107	7.38525	7.38525	7.20215	6.22559	7.38525	6.5918	5.92041	5.92041	5.67627	5.49316	0	0.0305176	-0.0305176	0.0305176	0	-30.5176	-0.0915527	0	-0.0610352	0	0
3.4	3.54004	7.32422	7.38525	7.20215	6.10352	7.32422	6.7749	5.92041	5.92041	5.67627	5.5542	-0.0610352	-0.0305176	0.0610352	0	0	-61.0352	-0.0305176	0	-0.0610352	-0.0305176	0
3.5	3.479	7.38525	7.38525	7.26318	6.04248	7.20215	6.7749	6.04248	5.92041	5.61523	5.67627	-0.0305176	-0.0305176	0	-0.0305176	0	-30.5176	0	-0.0305176	-0.0610352	-0.0610352	0.0305176
3.6	3.41797	7.38525	7.38525	7.26318	6.04248	7.08008	6.65283	6.04248	5.92041	5.5542	5.7373	0.0305176	-0.0305176	-0.0305176	-0.0305176	-0.0610352	-30.5176	-0.0305176	-0.0610352	0	0.0305176	-0.0305176
3.7	3.41797	7.44629	7.32422	7.26318	6.10352	7.08008	6.46973	6.04248	5.98144	5.49316	5.79834	-0.0305176	-0.0610352	-0.0305176	-0.0305176	-0.0305176	-30.5176	0.0305176	-0.0305176	-0.0305176	0.0305176	0.0305176
3.8	3.479	7.50732	7.38525	7.26318	6.10352	7.14111	6.40869	5.98144	5.85937	5.5542	5.7373	-0.0305176	-0.0305176	-0.0305176	-0.0915527	0.0305176	-30.5176	-0.0305176	0	-0.0305176	0.0305176	-0.0305176
3.9	3.54004	7.50732	7.38525	7.26318	6.10352	7.14111	6.40869	5.85937	5.7373	5.5542	5.7373	-0.0610352	-0.0305176	-0.0610352	-0.0305176	0	0	0	-0.0305176	-0.0305176	0	-0.0610352
4	3.54004	7.56836	7.44629	7.26318	6.16455	7.08008	6.40869	5.79834	5.67627	5.5542	5.61523	0	0	0	-0.0305176	0.0305176	0	0	0	-0.0610352	-0.0305176	-0.0305176
4.1	3.479	7.56836	7.50732	7.26318	6.22559	7.01904	6.34766	5.7373	5.67627	5.49316	5.5542	-0.0305176	0.0610352	-0.0305176	0	-0.0305176	-30.5176	0	0.0305176	-0.0305176	-0.0610352	0
4.2	3.54004	7.56836	7.50732	7.26318	6.16455	6.95801	6.34766	5.67627	5.67627	5.49316	5.43213	0	-0.0305176	-0.0305176	0	-0.0305176	-61.0352	-0.0610352	0	0	-0.0305176	0
4.3	3.60107	7.56836	7.56836	7.26318	6.16455	6.89697	6.40869	5.61523	5.7373	5.49316	5.43213	0	-0.0305176	-0.0305176	-0.0610352	-0.0305176	-30.5176	-0.0305176	-0.0610352	0.0305176	0	0.0305176
4.4	3.60107	7.50732	7.56836	7.32422	6.10352	6.89697	6.46973	5.67627	5.7373	5.5542	5.43213	-0.0610352	-0.0610352	-0.0610352	0.0305176	-0.0305176	0	-0.0610352	0	0.0305176	0.0305176	0
4.5	3.60107	7.50732	7.56836	7.32422	6.04248	6.89697	6.53076	5.7373	5.7373	5.5542	5.43213	-0.0305176	-0.0305176	-0.0610352	-0.0305176	-0.0305176	61.0352	0	-0.0305176	-0.0305176	0.0305176	-0.0610352
4.6	3.60107	7.50732	7.56836	7.32422	6.04248	6.95801	6.53076	5.7373	5.7373	5.5542	5.49316	-0.0610352	-0.0305176	-0.0610352	-0.0305176	-0.0305176	30.5176	-0.0305176	0	-0.0305176	0	-0.0305176
4.7	3.66211	7.56836	7.50732	7.32422	6.04248	6.95801	6.46973	5.79834	5.7373	5.49316	5.5542	-0.0305176	0	0.0305176	-0.0305176	0.0305176	-30.5176	0	-0.0305176	-0.0610352	-0.0305176	-0.0610352
4.8	3.60107	7.62939	7.44629	7.32422	6.16455	7.01904	6.46973	5.79834	5.7373	5.43213	5.5542	-0.0305176	0.0610352	-0.0305176	-0.0305176	0	-30.5176	0.0610352	-0.0305176	0	-0.0305176	-0.0305176
4.9	3.60107	7.69043	7.38525	7.32422	6.22559	7.01904	6.40869	5.7373	5.7373	5.37109	5.49316	-0.0305176	-0.0305176	0.0610352	0	0.0305176	-61.0352	0	-0.0305176	0.0305176	-0.0305176	-0.0305176
5	3.60107	7.75146	7.38525	7.26318	6.28662	7.01904	6.40869	5.7373	5.79834	5.31006	5.49316	0	0	-0.0305176	0	0	0	0	0	0.0305176	0.0610352	-0.0305176
5.1	3.60107	7.75146	7.38525	7.26318	6.28662	7.08008	6.34766	5.7373	5.7373	5.31006	5.5542	0	0.0305176	0	0	-0.0305176	0	-0.0305176	0	0	0.0305176	-0.0305176
5.2	3.66211	7.75146	7.32422	7.26318	6.28662	7.08008	6.34766	5.7373	5.7373	5.37109	5.67627	0	-0.0305176	0.0305176	0	0	0	0.0305176	-0.0305176	-0.0305176	0	-0.0305176
5.3	3.72314	7.69043	7.38525	7.26318	6.22559	7.08008	6.40869	5.7373	5.67627	5.43213	5.67627	0.0305176	-0.0305176	0	0	0	0	0.0305176	-0.0610352	0.0305176	-0.0610352	0
5.4	3.72314	7.62939	7.38525	7.32422	6.10352	7.08008	6.40869	5.67627	5.61523	5.49316	5.61523	-0.0305176	-0.0610352	-0.0305176	-0.0305176	0	0	0	-0.0305176	-0.0305176	-0.0305176	-0.0305176
5.5	3.78418	7.56836	7.44629	7.38525	6.10352	7.01904	6.40869	5.61523	5.61523	5.5542	5.61523	-0.0915527	-0.0610352	0	-0.0305176	0	30.5176	-0.0305176	-0.0915527	0	-0.0305176	-0.0305176
5.6	3.72314	7.50732	7.44629	7.44629	6.10352	7.01904	6.40869	5.49316	5.61523	5.5542	5.5542	-0.0610352	0	-0.0305176	0	-0.0305176	-30.5176	0.0305176	0	0.0305176	-0.0305176	0
5.7	3.78418	7.50732	7.38525	7.50732	6.16455	7.01904	6.40869	5.49316	5.61523	5.5542	5.49316	-0.0305176	0.0305176	0.0305176	-0.0305176	-0.0305176	-30.5176	0	0	0	-0.0305176	-0.0305176
5.8	3.78418	7.44629	7.44629	7.50732	6.22559	6.95801	6.40869	5.49316	5.5542	5.5542	5.49316	0	0	0	0	-0.0305176	-30.5176	-0.0305176	-0.0305176	0	-0.0305176	0
5.9	3.78418	7.38525	7.44629	7.50732	6.28662	6.95801	6.46973	5.61523	5.61523	5.49316	5.49316	-0.0610352	0	0	0	-0.0610352	0	-0.0305176	0	-0.0305176	-0.0610352	0.0305176
6	3.78418	7.32422	7.44629	7.50732	6.34766	6.95801	6.53076	5.7373	5.67627	5.49316	5.49316	-0.0305176	0	-0.0610352	0	-0.0305176	0	-0.0305176	-0.0305176	0	-0.0305176	-0.0305176
6.1	3.72314	7.32422	7.38525	7.44629	6.34766	7.01904	6.53076	5.7373	5.67627	5.43213	5.49316	-0.0610352	-0.0305176	-0.0610352	0	0.0305176	30.5176	-0.0305176	-0.0610352	-0.0305176	-0.0305176	-0.0305176
6.2	3.60107	7.32422	7.44629	7.50732	6.40869	6.95801	6.46973	5.79834	5.7373	5.49316	5.61523	-0.0610352	-0.0915527	-0.0610352	0	-0.0305176	30.5176	0	0	0.0305176	0	-0.0610352
6.3	3.479	7.32422	7.50732	7.44629	6.40869	6.95801	6.40869	5.79834	5.67627	5.49316	5.61523	-0.0305176	0.0305176	0	0	0	0	-0.0305176	0	-0.0305176	-0.0305176	0
6.4	3.41797	7.32422	7.56836	7.50732	6.40869	7.01904	6.40869	5.79834	5.61523	5.49316	5.61523	-0.0915527	0.0305176	-0.0610352	0.0305176	-0.0305176	-61.0352	0	0	0	-0.0915527	-0.0915527
6.5	3.2959	7.32422	7.62939	7.44629	6.40869	7.01904	6.40869	5.85937	5.61523	5.37109	5.61523	0	-0.0305176	-0.0305176	-0.0305176	0.0305176	-30.5176	-0.0915527	0	-0.0305176	-0.0610352	0
6.6	3.2959	7.38525	7.56836	7.50732	6.34766	7.08008	6.46973	5.85937	5.61523	5.31006	5.5542	-0.0305176	-0.0305176	-0.0305176	0.0305176	-0.0610352	61.0352	0	0.0305176	-0.0305176	-0.0305176	-0.0305176
6.7	3.35693	7.44629	7.50732	7.50732	6.28662	7.14111	6.53076	5.79834	5.61523	5.24902	5.5542	-0.0305176	-0.0305176	-0.0610352	-0.0305176	-0.0305176	30.5176	-0.0610352	0	0	-0.0305176	0
6.8	3.54004	7.50732	7.50732	7.44629	6.28662	7.20215	6.5918	5.79834	5.61523	5.31006	5.5542	-0.0610352	-0.0305176	-0.0305176	-0.0305176	0	61.0352	0	0	0	0	0.0305176
6.9	3.66211	7.56836	7.50732	7.44629	6.22559	7.20215	6.5918	5.79834	5.61523	5.37109	5.5542	-0.0915527	-0.0305176	-0.0305176	-0.0305176	0	0	0	0	0.0305176	0	0
7	3.78418	7.56836	7.44629	7.32422	6.16455	7.20215	6.5918	5.79834	5.5542	5.43213	5.5542	-0.0610352	-0.0305176	-0.0305176	0	0.0305176	0	-0.0305176	-0.0305176	0.0305176	-0.0305176	-0.0305176
7.1	3.78418	7.50732	7.44629	7.26318	6.10352	7.14111	6.65283	5.67627	5.61523	5.49316	5.5542	-0.0305176	-0.0305176	0.0305176	0.0305176	0.0305176	-61.0352	0	-0.0305176	-0.0305176	-0.0305176	-0.0305176
7.2	3.78418	7.44629	7.44629	7.20215	5.98144	7.08008	6.65283	5.61523	5.67627	5.5542	5.5542	-0.0305176	-0.0610352	-0.0305176	-0.0305176	0.0305176	0	0.0305176	0	0	-0.0305176	0.0305176
7.3	3.78418	7.32422	7.50732	7.20215	5.92041	7.08008	6.5918	5.49316	5.67627	5.61523	5.5542	-0.0610352	-0.0305176	0	0.0305176	-0.0610352	0	0.0305176	0.0610352	0	0	0.0305176
7.4	3.78418	7.32422	7.50732	7.20215	5.85937	7.08008	6.53076	5.49316	5.7373	5.61523	5.5542	-0.0305176	-0.0305176	-0.0610352	0.0610352	-0.0305176	-30.5176	0	0.0610352	-0.0305176	-0.0305176	0.0305176
7.5	3.72314	7.32422	7.50732	7.20215	5.92041	7.08008	6.40869	5.49316	5.7373	5.49316	5.49316	-0.0305176	0.0610352	-0.0915527	0.0305176	0.0915527	0	-0.0305176	0.0305176	0.0610352	-0.0305176	0.0305176
7.6	3.66211	7.38525	7.50732	7.26318	5.98144	7.08008	6.40869	5.49316	5.7373	5.43213	5.49316	-0.0610352	-0.0305176	-0.0610352	0.0305176	0	-30.5176	-0.0305176	0	-0.0305176	-0.0305176	0
7.7	3.66211	7.44629	7.56836	7.26318	6.04248	7.01904	6.40869	5.5542	5.7373	5.31006	5.49316	-0.0915527	-0.0305176	-0.0610352	-0.0305176	0.0305176	30.5176	-0.0305176	-0.0610352	0	-0.0610352	0
7.8	3.60107	7.50732	7.62939	7.26318	6.10352	7.01904	6.46973	5.5542	5.79834	5.37109	5.5542	-0.0305176	-0.0305176	-0.0610352	-0.0305176	-0.0305176	61.0352	0	-0.0305176	0.0305176	0	0.0610352
7.9	3.60107	7.56836	7.69043	7.32422	6.16455	7.08008	6.46973	5.61523	5.79834	5.43213	5.5542	-0.0915527	-0.0305176	-0.0915527	-0.0305176	-0.0305176	0	0.0305176	0	0.0305176	0	0
8	3.66211	7.50732	7.69043	7.32422	6.22559	7.14111	6.46973	5.67627	5.79834	5.49316	5.5542	-0.0610352	0	-0.0915527	-0.0305176	-0.0305176	-30.5176	0.0305176	0	-0.0610352	0	0
8.1	3.66211	7.50732	7.56836	7.38525	6.22559	7.26318	6.46973	5.67627	5.79834	5.49316	5.61523	-0.0305176	0	-0.0305176	0.0305176	0.0610352	-30.5176	0	0.0610352	-0.0305176	-0.0915527	-0.0305176
8.2	3.72314	7.44629	7.50732	7.32422	6.22559	7.26318	6.46973	5.67627	5.7373	5.49316	5.67627	-0.0305176	0	0	0	0.0610352	-61.0352	0.0305176	-0.0305176	0	-0.0915527	0
8.3	3.78418	7.44629	7.44629	7.32422	6.22559	7.20215	6.46973	5.5542	5.7373	5.43213	5.67627	-0.0305176	-0.0305176	0	0	0	30.5176	-0.0305176	-0.0305176	0.0305176	-0.0610352	0.0305176
8.4	3.84521	7.44629	7.44629	7.26318	6.16455	7.14111	6.53076	5.5542	5.7373	5.37109	5.67627	0	-0.0305176	0	-0.0610352	-0.0305176	0	-0.0305176	0.0305176	0.0610352	0	-0.0305176
8.5	3.84521	7.44629	7.44629	7.26318	6.10352	7.01904	6.53076	5.5542	5.79834	5.43213	5.67627	-0.0305176	-0.0305176	-0.0915527	0	-0.0610352	0	0.0305176	0.0305176	0.0305176	0	0.0305176
8.6	3.84521	7.44629	7.38525	7.20215	6.04248	6.95801	6.5918	5.5542	5.85937	5.43213	5.67627	-0.0305176	-0.0305176	-0.0915527	0.0305176	0.0305176	-61.0352	0	0.0610352	0.0305176	0	-0.0915527
8.7	3.78418	7.44629	7.38525	7.20215	6.04248	6.89697	6.53076	5.5542	5.92041	5.37109	5.67627	-0.0610352	0	-0.0610352	-0.0610352	0.152588	-30.5176	0	-0.0305176	-0.0305176	-0.0915527	-0.0610352
8.8	3.66211	7.44629	7.32422	7.20215	5.98144	6.89697	6.46973	5.5542	5.92041	5.37109	5.67627	-0.0610352	0	-0.0305176	-0.0305176	0.0305176	30.5176	-0.0305176	0	-0.0305176	-0.0305176	-0.0610352
8.9	3.66211	7.50732	7.26318	7.20215	5.98144	6.95801	6.46973	5.5542	5.85937	5.37109	5.79834	-0.0305176	0	0	-0.0305176	0	30.5176	0.0305176	-0.0305176	0.0610352	0	0
9	3.60107	7.44629	7.20215	7.26318	5.92041	7.08008	6.46973	5.5542	5.85937	5.37109	5.85937	-0.0915527	0.0610352	-0.0305176	0	-0.0305176	30.5176	0.0610352	0.0305176	0.0305176	-0.0610352	0
9.1	3.60107	7.44629	7.14111	7.32422	5.92041	7.20215	6.46973	5.5542	5.85937	5.37109	5.85937	-0.0610352	0	0	0.0610352	0	0	0	0.0305176	0	-0.0610352	0
9.2	3.60107	7.38525	7.14111	7.32422	5.92041	7.20215	6.53076	5.5542	5.85937	5.31006	5.85937	0	0	-0.0305176	0.0305176	-0.0305176	-30.5176	-0.0305176	0.0305176	-0.0305176	-0.0610352	-0.0305176
9.3	3.60107	7.38525	7.20215	7.38525	5.85937	7.20215	6.5918	5.49316	5.92041	5.37109	5.85937	-0.0305176	0	-0.0610352	0	0.0610352	30.5176	0	-0.0610352	-0.0305176	-0.0915527	0
9.4	3.66211	7.44629	7.26318	7.38525	5.85937	7.14111	6.5918	5.5542	5.98144	5.43213	5.79834	-0.0915527	-0.0305176	-0.0305176	-0.0305176	0	61.0352	0	-0.0610352	0.0610352	-0.0610352	-0.0305176
9.5	3.66211	7.50732	7.38525	7.38525	5.79834	7.14111	6.5918	5.5542	5.98144	5.49316	5.7373	-0.0610352	0	-0.0305176	-0.0610352	-0.0305176	61.0352	0	-0.0610352	0.0610352	-0.0305176	-0.0305176
9.6	3.66211	7.56836	7.44629	7.38525	5.85937	7.14111	6.5918	5.5542	5.98144	5.49316	5.67627	-0.0305176	-0.0305176	-0.0305176	0	-0.0305176	30.5176	0.0610352	0	0.0305176	-0.0305176	-0.0610352
9.7	3.66211	7.56836	7.56836	7.38525	5.85937	7.14111	6.5918	5.61523	5.98144	5.49316	5.67627	-0.0305176	0	-0.0305176	0	0	-30.5176	0.0305176	0.0915527	0	-0.0305176	-0.0915527
9.8	3.66211	7.50732	7.56836	7.32422	5.92041	7.08008	6.53076	5.67627	5.98144	5.49316	5.67627	-0.0610352	0	0	0.0305176	0.0305176	-61.0352	0	0.0305176	-0.0305176	-0.0915527	-0.0610352
9.9	3.72314	7.44629	7.56836	7.32422	5.98144	7.14111	6.53076	5.61523	5.85937	5.49316	5.67627	-0.0305176	0	-0.0610352	-0.0305176	-0.0305176	0	-0.0610352	0.0305176	-0.0305176	-0.0610352	-0.0305176
10	3.84521	7.38525	7.56836	7.32422	6.04248	7.14111	6.40869	5.61523	5.79834	5.49316	5.67627	-0.0305176	-0.0305176	-0.0610352	-0.0305176	-0.0305176	61.0352	0	0	0	-0.0610352	-0.0610352
10.1	3.90625	7.32422	7.50732	7.26318	6.10352	7.20215	6.40869	5.61523	5.79834	5.43213	5.67627	-0.0305176	0	-0.0305176	0.0610352	0	0	0	-0.0305176	0.0610352	-0.0305176	-0.0305176
10.2	3.84521	7.26318	7.44629	7.26318	6.04248	7.26318	6.34766	5.67627	5.79834	5.43213	5.67627	-0.0610352	-0.0305176	0	0.0305176	-0.0305176	0	0.0305176	0.0305176	0.0305176	-0.0305176	-0.0305176
10.3	3.84521	7.32422	7.38525	7.26318	5.98144	7.32422	6.34766	5.7373	5.79834	5.37109	5.7373	-0.0610352	-0.0305176	-0.0610352	-0.0305176	0	-30.5176	0	0	0	-0.0305176	-0.0305176
10.4	3.78418	7.32422	7.38525	7.20215	5.92041	7.38525	6.34766	5.79834	5.79834	5.37109	5.7373	-0.0610352	-0.0610352	-0.0305176	-0.0305176	0.0305176	-30.5176	-0.0305176	-0.0305176	0	0.0305176	-0.0305176
10.5	3.72314	7.44629	7.38525	7.26318	5.85937	7.32422	6.34766	5.79834	5.79834	5.31006	5.79834	-0.0610352	0	0	0	0.0305176	-30.5176	-0.0305176	0	-0.0305176	-0.0305176	-0.0305176
10.6	3.78418	7.50732	7.38525	7.26318	5.92041	7.26318	6.40869	5.85937	5.85937	5.31006	5.79834	0.0305176	-0.0305176	0	0.0305176	-0.0305176	-30.5176	0	-0.0610352	0.0915527	-0.0305176	0.0305176
10.7	3.78418	7.50732	7.38525	7.20215	5.92041	7.20215	6.46973	5.92041	5.85937	5.37109	5.79834	-0.0305176	0	-0.0305176	0	-0.0610352	0	0	0.0305176	0.0610352	-0.0305176	0
10.8	3.84521	7.50732	7.38525	7.20215	5.98144	7.20215	6.53076	5.92041	5.79834	5.49316	5.79834	-0.0305176	-0.0305176	0	0	-0.0305176	0	0.0305176	0.0305176	0	-0.0305176	0
10.9	3.84521	7.44629	7.38525	7.14111	6.04248	7.20215	6.53076	5.92041	5.7373	5.5542	5.79834	-0.0305176	-0.0305176	0	0	0	-61.0352	-0.0305176	0	0	0	0
11	3.84521	7.50732	7.38525	7.14111	6.10352	7.26318	6.53076	5.85937	5.67627	5.49316	5.85937	-0.0610352	-0.0305176	-0.0305176	-0.0610352	-0.0305176	-30.5176	-0.0305176	0	0	-0.0305176	0
11.1	3.72314	7.50732	7.38525	7.20215	6.16455	7.20215	6.53076	5.79834	5.67627	5.49316	5.92041	-0.0610352	-0.0915527	-0.0610352	-0.0305176	0	0	-0.0610352	0	0	-0.0305176	-0.0610352
11.2	3.60107	7.50732	7.38525	7.26318	6.10352	7.20215	6.5918	5.7373	5.7373	5.49316	5.92041	0.0305176	0	0	0.0305176	0.0305176	61.0352	0.0305176	-0.0305176	-0.0305176	-0.0305176	-0.0305176
11.3	3.66211	7.44629	7.32422	7.32422	6.10352	7.14111	6.65283	5.67627	5.7373	5.43213	5.85937	0	-0.0610352	0	-0.0305176	-0.0915527	0	0	0	0	0	0
11.4	3.72314	7.44629	7.26318	7.32422	6.10352	7.08008	6.65283	5.7373	5.79834	5.43213	5.79834	0.0305176	-0.0305176	0	0	0.0305176	-30.5176	0	0.0305176	-0.0305176	-0.0305176	0
11.5	3.78418	7.50732	7.20215	7.26318	6.10352	7.14111	6.5918	5.79834	5.79834	5.49316	5.7373	0.0305176	0.0305176	0.0305176	0.0305176	0	-30.5176	-0.0305176	0.0305176	-0.0610352	-0.12207	0.0305176
11.6	3.84521	7.50732	7.20215	7.20215	6.10352	7.20215	6.5918	5.85937	5.85937	5.43213	5.79834	-0.0305176	0	-0.0305176	0	0	-61.0352	-0.0305176	0	-0.0610352	-0.0610352	0
11.7	3.84521	7.50732	7.26318	7.26318	6.04248	7.14111	6.53076	5.92041	5.79834	5.31006	5.85937	0	-0.0610352	-0.0305176	-0.0610352	0.0305176	-30.5176	-0.0305176	0	-0.0305176	-0.0305176	0.0305176
11.8	3.78418	7.50732	7.38525	7.32422	6.10352	7.08008	6.53076	5.98144	5.79834	5.31006	5.85937	0.0610352	-0.0610352	-0.0610352	0.0305176	-0.0305176	-30.5176	0	0	-0.0305176	-0.0305176	0
11.9	3.72314	7.38525	7.50732	7.38525	6.16455	7.01904	6.40869	5.98144	5.79834	5.37109	5.85937	0	-0.0610352	-0.0610352	0	0.0305176	0	0	-0.0305176	0	0	0
12	3.72314	7.32422	7.50732	7.38525	6.22559	7.08008	6.40869	5.92041	5.85937	5.5542	5.92041	0	0	-0.0610352	0	0.0305176	-30.5176	0	-0.0305176	-0.0305176	0	0
12.1	3.72314	7.20215	7.50732	7.32422	6.22559	7.14111	6.40869	5.92041	5.79834	5.67627	5.85937	-0.0305176	0	0	0	0	-61.0352	0.0305176	-0.0305176	-0.0305176	0	0
12.2	3.72314	7.26318	7.44629	7.26318	6.22559	7.20215	6.46973	5.92041	5.79834	5.67627	5.85937	0.0305176	0	0	0	0	-91.5527	0	-0.0305176	-0.0610352	-0.0610352	0
12.3	3.72314	7.32422	7.38525	7.26318	6.22559	7.14111	6.53076	5.98144	5.79834	5.5542	5.85937	0.0305176	-0.0305176	0	-0.0305176	-0.0305176	-30.5176	0	-0.0305176	-0.0305176	-0.0305176	0.0305176
12.4	3.72314	7.38525	7.38525	7.26318	6.28662	7.01904	6.53076	6.04248	5.85937	5.5542	5.67627	0.0305176	-0.0305176	0	-0.0305176	0	-61.0352	-0.0305176	0.0305176	-0.0305176	-0.0305176	-0.0305176
12.5	3.78418	7.38525	7.32422	7.32422	6.28662	6.95801	6.5918	6.10352	5.92041	5.5542	5.5542	0.0610352	-0.0305176	-0.0610352	0	-0.0305176	-30.5176	-0.0610352	0	0	0	0.0305176
12.6	3.84521	7.44629	7.32422	7.38525	6.34766	6.83594	6.53076	6.16455	5.98144	5.67627	5.5542	-0.0610352	-0.0305176	-0.0305176	0	-0.0610352	30.5176	-0.0305176	0.0305176	0.0305176	-0.0305176	0
12.7	3.90625	7.44629	7.32422	7.38525	6.34766	6.7749	6.53076	6.10352	6.04248	5.67627	5.67627	-0.0305176	0	-0.0305176	-0.0305176	0.0305176	0	0	-0.0610352	-0.0305176	-0.0305176	-0.0610352
12.8	4.02832	7.50732	7.38525	7.38525	6.34766	6.71387	6.40869	6.10352	6.04248	5.7373	5.79834	-0.0610352	0.0305176	0	-0.0610352	0	30.5176	-0.0305176	-0.0305176	0	-0.0305176	-0.0915527
12.9	4.08936	7.50732	7.44629	7.38525	6.34766	6.71387	6.40869	6.10352	5.98144	5.7373	5.92041	0	-0.0610352	0	-0.0610352	0	30.5176	0	-0.0305176	0.0305176	-0.0305176	-0.0305176
13	4.15039	7.50732	7.56836	7.32422	6.34766	6.71387	6.46973	6.04248	5.85937	5.7373	5.92041	-0.0305176	0	0.0305176	-0.0305176	0	0	-0.0915527	0	0.0305176	-0.0305176	-0.0610352
13.1	4.15039	7.44629	7.62939	7.26318	6.34766	6.7749	6.46973	6.04248	5.79834	5.67627	5.92041	-0.0305176	-0.0305176	-0.0305176	0	0	-30.5176	-0.0305176	0.0305176	-0.0305176	0	0
13.2	4.02832	7.38525	7.56836	7.32422	6.28662	6.83594	6.46973	6.04248	5.79834	5.67627	5.92041	-0.0305176	0	0.0305176	0.0305176	-0.0610352	0	-0.0305176	0	-0.0610352	0	-0.0305176
13.3	3.96728	7.32422	7.44629	7.32422	6.28662	6.89697	6.46973	6.04248	5.85937	5.67627	5.92041	0	-0.0305176	-0.0305176	-0.0305176	-0.0305176	0	0	0	-0.0305176	-0.0305176	0
13.4	3.90625	7.32422	7.32422	7.38525	6.28662	6.89697	6.46973	6.04248	5.92041	5.7373	5.85937	-0.0305176	0	-0.0305176	-0.0305176	0.0305176	-30.5176	0.0305176	-0.0610352	0	0.0610352	0
13.5	3.90625	7.38525	7.26318	7.32422	6.28662	6.95801	6.46973	6.04248	5.98144	5.67627	5.79834	-0.0305176	-0.0305176	-0.0915527	-0.0610352	0	-30.5176	-0.0305176	-0.0305176	0.0915527	0	0
13.6	3.96728	7.44629	7.26318	7.26318	6.22559	7.01904	6.46973	6.04248	5.98144	5.7373	5.67627	-0.0305176	0	0	-0.0915527	0.0305176	-30.5176	0	0.0305176	0.0610352	0	-0.0305176
13.7	4.02832	7.50732	7.26318	7.26318	6.22559	7.01904	6.46973	5.92041	5.98144	5.7373	5.67627	-0.0610352	0.0305176	0	-0.0610352	-0.0305176	30.5176	0	0	-0.0305176	0	-0.0305176
13.8	4.08936	7.50732	7.26318	7.26318	6.28662	7.08008	6.40869	5.92041	5.98144	5.7373	5.67627	-0.0305176	0.0305176	0.0305176	-0.0915527	0	-30.5176	0.0305176	-0.0305176	0	0	-0.0305176
13.9	4.15039	7.56836	7.26318	7.20215	6.28662	7.14111	6.40869	5.92041	5.98144	5.7373	5.79834	-0.0305176	-0.0305176	0.0305176	-0.0305176	-0.0915527	0	0	0	-0.0610352	-0.0305176	0
14	4.21143	7.69043	7.32422	7.20215	6.28662	7.20215	6.46973	5.92041	5.92041	5.79834	5.79834	0	0	0.0305176	0	-0.0305176	-30.5176	-0.0305176	-0.0305176	-0.0305176	0	-0.0610352
14.1	4.21143	7.69043	7.38525	7.20215	6.22559	7.20215	6.46973	5.92041	5.98144	5.85937	5.85937	0.0305176	-0.0305176	-0.0305176	0	0	-30.5176	-0.0610352	0.0305176	-0.0305176	-0.0305176	0
14.2	4.21143	7.69043	7.38525	7.26318	6.28662	7.20215	6.53076	5.98144	5.98144	5.92041	5.79834	0.0305176	0	0.0305176	-0.0305176	0	0	-0.0305176	-0.0305176	0.0610352	-0.0305176	0
14.3	4.08936	7.56836	7.38525	7.26318	6.22559	7.20215	6.46973	5.98144	5.98144	5.85937	5.85937	0.0305176	-0.0305176	0	-0.0610352	-0.0305176	0	-0.0610352	-0.0305176	-0.0305176	-0.0305176	-0.0610352
14.4	3.96728	7.50732	7.38525	7.32422	6.16455	7.20215	6.46973	5.98144	5.98144	5.85937	5.85937	0	0	0	-0.0610352	-0.0305176	0	0	-0.0305176	-0.0305176	-0.0305176	0
14.5	3.90625	7.50732	7.32422	7.26318	6.10352	7.20215	6.46973	5.98144	5.92041	5.79834	5.85937	0	-0.0305176	-0.0305176	-0.0305176	-0.0610352	0	0	0	-0.0305176	0.0305176	-0.0305176
14.6	3.84521	7.56836	7.32422	7.20215	6.10352	7.14111	6.40869	6.04248	5.85937	5.85937	5.85937	0	0	0.0305176	-0.0305176	0	-61.0352	-0.0305176	-0.0915527	-0.0305176	-0.0610352	-0.0305176
14.7	3.90625	7.56836	7.26318	7.20215	6.04248	7.08008	6.34766	6.04248	5.79834	5.85937	5.85937	0.0305176	0.0305176	0	-0.0305176	0	-30.5176	0	-0.0305176	-0.0915527	0	0
14.8	3.96728	7.56836	7.32422	7.14111	6.04248	7.14111	6.28662	6.04248	5.7373	5.85937	5.85937	0.0610352	0	0.0305176	0	-0.0610352	-30.5176	-0.0305176	0.0305176	-0.0305176	-0.0305176	-0.0305176
14.9	4.02832	7.56836	7.32422	7.14111	5.98144	7.14111	6.28662	6.04248	5.79834	5.85937	5.85937	0.0305176	0	0.0305176	0	-0.0610352	0	0.0305176	0	-0.0610352	0	-0.0305176
15	4.08936	7.50732	7.38525	7.08008	6.04248	7.08008	6.34766	6.04248	5.79834	5.85937	5.85937	0	0	-0.0305176	-0.0305176	-0.0610352	-30.5176	0	0	0	-0.0305176	0
15.1	4.15039	7.50732	7.38525	7.08008	6.16455	7.08008	6.40869	6.04248	5.79834	5.85937	5.85937	0	-0.0610352	0	-0.0610352	0	-61.0352	-0.0610352	-0.0305176	0	-0.0305176	0
15.2	4.15039	7.50732	7.32422	7.08008	6.28662	7.14111	6.40869	5.98144	5.79834	5.85937	5.79834	-0.0305176	0	0.0305176	-0.0915527	0.0305176	-30.5176	-0.0305176	-0.0610352	-0.0305176	0	-0.0610352
15.3	4.08936	7.44629	7.26318	7.01904	6.40869	7.20215	6.40869	5.92041	5.85937	5.79834	5.79834	0	-0.0305176	0	-0.0610352	0	0	-0.0305176	-0.0305176	-0.0610352	0.0305176	-0.0610352
15.4	4.08936	7.44629	7.26318	7.01904	6.40869	7.26318	6.40869	5.98144	5.85937	5.7373	5.79834	0	0.0610352	0.0610352	-0.0305176	-0.0305176	30.5176	0	-0.0305176	0	0.0305176	-0.0305176
15.5	4.08936	7.38525	7.20215	7.01904	6.40869	7.26318	6.34766	6.04248	5.85937	5.67627	5.79834	0	-0.0305176	0	-0.0305176	-0.0305176	-30.5176	0.0305176	0.0305176	-0.0305176	0.0305176	0.0610352
15.6	4.02832	7.32422	7.26318	7.08008	6.34766	7.26318	6.34766	6.10352	5.85937	5.61523	5.79834	0.0305176	-0.0305176	0.0305176	-0.0305176	-0.0305176	-61.0352	-0.0610352	0.0305176	-0.0610352	0	0
15.7	4.02832	7.26318	7.26318	7.08008	6.28662	7.20215	6.34766	6.16455	5.79834	5.67627	5.79834	0.0305176	0	0	-0.0610352	-0.0305176	-30.5176	-0.0610352	-0.0610352	-0.0610352	-0.0610352	-0.0305176
15.8	3.96728	7.26318	7.32422	7.14111	6.22559	7.14111	6.34766	6.16455	5.79834	5.7373	5.85937	0.0915527	-0.0305176	0	0	0	-91.5527	-0.0915527	-0.0610352	-0.0305176	-0.0305176	0.0305176
15.9	3.96728	7.32422	7.38525	7.20215	6.16455	7.14111	6.40869	6.16455	5.79834	5.79834	5.92041	0.0305176	-0.0610352	-0.0305176	0	-0.0610352	30.5176	-0.0305176	-0.0610352	-0.0305176	-0.0305176	0
16	3.96728	7.38525	7.38525	7.20215	6.10352	7.14111	6.40869	6.16455	5.79834	5.79834	5.92041	0	0	0	-0.0610352	-0.0305176	0	0.0610352	0	-0.0305176	0.0305176	0
16.1	3.96728	7.38525	7.38525	7.20215	6.10352	7.14111	6.40869	6.16455	5.79834	5.79834	5.85937	-0.0305176	0	0	-0.0305176	0	-30.5176	0.0305176	0	-0.0305176	0.0305176	0
16.2	3.96728	7.38525	7.32422	7.20215	6.04248	7.14111	6.40869	6.10352	5.79834	5.79834	5.85937	0	0	0.0305176	0.0305176	-0.0610352	-61.0352	-0.0305176	-0.0305176	-0.0305176	0.0305176	0
16.3	3.96728	7.32422	7.32422	7.14111	5.98144	7.14111	6.40869	6.10352	5.85937	5.85937	5.92041	0.0610352	0	0	-0.0305176	0.0305176	-61.0352	-0.0610352	-0.0915527	-0.0610352	-0.0305176	-0.0305176
16.4	4.02832	7.38525	7.32422	7.08008	5.98144	7.14111	6.40869	6.10352	5.92041	5.92041	5.92041	0.0305176	-0.0305176	0.0305176	-0.0610352	-0.0610352	-61.0352	-0.0305176	-0.0305176	-0.0915527	-0.0305176	-0.0610352
16.5	4.08936	7.44629	7.38525	7.01904	5.98144	7.20215	6.40869	6.10352	5.92041	6.04248	5.92041	0.0305176	-0.0305176	0	-0.0305176	-0.0610352	-30.5176	-0.0305176	-0.0610352	-0.0610352	0	0
16.6	4.08936	7.44629	7.44629	7.08008	6.04248	7.26318	6.40869	6.16455	5.98144	6.10352	5.85937	0.0305176	-0.0305176	0	0	-0.0610352	0	-0.0305176	-0.0305176	0	0	0.0610352
16.7	4.02832	7.50732	7.44629	7.08008	6.10352	7.26318	6.40869	6.16455	5.92041	6.10352	5.85937	-0.0305176	-0.0305176	0.0610352	-0.0305176	0	-30.5176	-0.0305176	0	-0.0305176	0.0305176	0.0610352
16.8	4.02832	7.44629	7.44629	7.14111	6.10352	7.20215	6.34766	6.10352	5.98144	6.10352	5.79834	0	-0.0305176	0	-0.0305176	0	-61.0352	-0.0610352	-0.0610352	0	-0.0305176	-0.0610352
16.9	3.96728	7.44629	7.38525	7.14111	6.16455	7.14111	6.34766	6.04248	5.98144	5.98144	5.79834	-0.0305176	-0.0305176	0.0305176	-0.0610352	0.0305176	-30.5176	-0.0610352	-0.0610352	-0.0915527	0.0305176	0
17	3.96728	7.32422	7.38525	7.01904	6.22559	7.08008	6.28662	5.98144	5.98144	5.98144	5.85937	0.0610352	-0.0305176	0	-0.0610352	0	0	0	0	-0.0305176	0.0305176	-0.0305176
17.1	3.96728	7.32422	7.32422	6.95801	6.28662	7.08008	6.28662	5.92041	5.92041	5.92041	5.85937	0	0	0	-0.0610352	-0.0610352	30.5176	0.0610352	-0.0305176	-0.0305176	0.0610352	0
17.2	4.02832	7.26318	7.26318	6.95801	6.28662	7.08008	6.22559	5.98144	5.92041	5.92041	5.85937	0	0	-0.0305176	-0.0305176	-0.0915527	-30.5176	-0.0305176	0	-0.0305176	0.0610352	0.0610352
17.3	4.08936	7.26318	7.20215	6.95801	6.22559	7.14111	6.16455	5.98144	5.92041	5.85937	5.92041	0.0305176	0	0	0	-0.0610352	-61.0352	0	0	0	-0.0305176	0
17.4	4.15039	7.26318	7.14111	7.01904	6.16455	7.14111	6.22559	6.04248	5.85937	5.85937	5.92041	0.0305176	0	-0.0305176	-0.0305176	0	-91.5527	-0.0915527	-0.0305176	-0.0610352	0	-0.0610352
17.5	4.15039	7.20215	7.08008	7.01904	6.10352	7.20215	6.28662	5.98144	5.85937	5.85937	5.92041	0.0305176	0	0.0305176	-0.0610352	0.0305176	-61.0352	-0.0610352	-0.0915527	-0.0610352	0	-0.0610352
17.6	4.08936	7.20215	7.08008	7.01904	6.10352	7.14111	6.34766	5.98144	5.85937	5.85937	5.85937	-0.0305176	-0.0305176	-0.0610352	-0.0610352	-0.0305176	0	0.0305176	-0.12207	-0.0305176	0	0
17.7	4.08936	7.20215	7.14111	7.01904	6.04248	7.14111	6.40869	5.98144	5.85937	5.85937	5.85937	0	0	-0.0305176	-0.0610352	0	-30.5176	-0.0305176	-0.0305176	0	0.0305176	0.0610352
17.8	4.02832	7.26318	7.26318	7.01904	6.04248	7.08008	6.46973	6.10352	5.79834	5.92041	5.85937	0	-0.0305176	0.0305176	-0.0610352	0	-30.5176	-0.0305176	0	0.0305176	0	-0.0610352
17.9	4.02832	7.32422	7.32422	7.08008	6.10352	7.08008	6.46973	6.10352	5.79834	5.92041	5.92041	0	-0.0305176	0	-0.0610352	0.0305176	30.5176	-0.0610352	-0.0305176	-0.0610352	0.0305176	-0.0610352
18	4.02832	7.32422	7.26318	7.14111	6.16455	7.01904	6.46973	6.16455	5.79834	5.92041	5.98144	0.0305176	0	0.0305176	-0.0610352	0.0305176	-30.5176	-0.0610352	0	-0.0915527	-0.0305176	-0.0305176
18.1	4.02832	7.32422	7.26318	7.14111	6.22559	7.08008	6.53076	6.16455	5.79834	5.92041	5.98144	-0.0305176	0.0305176	0	-0.0915527	-0.0305176	-30.5176	0	-0.0305176	-0.0610352	-0.0305176	0
18.2	4.02832	7.26318	7.20215	7.14111	6.22559	7.14111	6.46973	6.16455	5.85937	5.85937	5.92041	0.0305176	-0.0305176	0	0	-0.0305176	-30.5176	0.0305176	-0.0305176	-0.0305176	0	0.0305176
18.3	4.02832	7.26318	7.20215	7.08008	6.16455	7.14111	6.46973	6.16455	5.92041	5.85937	5.85937	-0.0610352	0	0	-0.0305176	-0.0610352	-30.5176	0	0	-0.0305176	0.0305176	0.0305176
18.4	4.02832	7.32422	7.14111	7.01904	6.10352	7.20215	6.53076	6.16455	5.85937	5.92041	5.85937	0	0.0305176	0	-0.0915527	-0.0305176	-30.5176	0.0305176	-0.0305176	0	0.0915527	-0.0610352
18.5	4.08936	7.38525	7.20215	6.95801	6.04248	7.20215	6.5918	6.16455	5.85937	5.98144	5.85937	-0.0305176	0.0305176	0	-0.0610352	0.0610352	-30.5176	-0.0610352	-0.0305176	-0.0305176	0	-0.0915527
18.6	4.15039	7.38525	7.20215	6.89697	6.04248	7.20215	6.5918	6.22559	5.85937	6.04248	5.85937	0	-0.0305176	0	-0.0610352	0.0305176	-30.5176	-0.0305176	-0.0305176	-0.0915527	0	-0.0915527
18.7	4.21143	7.38525	7.20215	6.83594	6.04248	7.26318	6.53076	6.22559	5.85937	6.04248	5.85937	0	-0.0305176	0	-0.0610352	0	-30.5176	0	-0.0915527	-0.0305176	0	-0.0610352
18.8	4.15039	7.38525	7.20215	6.7749	6.04248	7.32422	6.46973	6.22559	5.85937	6.04248	5.79834	-0.0305176	0.0305176	0.0305176	-0.0915527	-0.0610352	0	0	-0.0305176	0	-0.0305176	0.0610352
18.9	4.08936	7.44629	7.20215	6.7749	5.98144	7.44629	6.46973	6.16455	5.92041	6.04248	5.79834	0	0	0.0305176	0.0305176	-0.0915527	-30.5176	0.0305176	-0.0305176	0.0305176	0.0610352	0.0305176
19	4.02832	7.44629	7.20215	6.7749	5.92041	7.44629	6.40869	6.10352	5.98144	5.98144	5.7373	-0.0305176	0	0	0.0305176	-0.0305176	-30.5176	0	0	-0.0610352	0	0
19.1	4.02832	7.50732	7.26318	6.71387	5.92041	7.38525	6.40869	6.10352	5.92041	5.92041	5.79834	0	-0.0610352	-0.0305176	-0.0305176	-0.0610352	-30.5176	-0.0610352	0.0610352	-0.0305176	0	-0.0305176
19.2	4.15039	7.56836	7.26318	6.71387	5.92041	7.32422	6.34766	6.10352	5.85937	5.85937	5.92041	0	-0.0305176	0	0	0	0	-0.0610352	-0.0610352	-0.0305176	-0.0305176	-0.0305176
19.3	4.21143	7.62939	7.32422	6.7749	5.92041	7.20215	6.34766	6.10352	5.79834	5.79834	5.92041	-0.0305176	-0.0305176	0	-0.0305176	-0.0305176	0	0.0305176	-0.0915527	0	0	-0.0610352
19.4	4.27246	7.75146	7.26318	6.83594	6.04248	7.14111	6.34766	6.10352	5.7373	5.85937	5.98144	-0.0305176	0	0	-0.0305176	0	30.5176	0.0610352	-0.0305176	-0.0305176	0.0305176	0.0305176
19.5	4.21143	7.75146	7.26318	6.89697	6.10352	7.08008	6.34766	6.04248	5.7373	5.92041	5.98144	-0.0305176	0.0610352	0	0	-0.0305176	0	0.0305176	0	0	0	0
19.6	4.08936	7.62939	7.32422	7.01904	6.16455	7.08008	6.28662	6.04248	5.7373	5.98144	5.98144	0	-0.0305176	0.0305176	0.0305176	0	30.5176	-0.0305176	0	-0.0305176	0	-0.0305176
19.7	4.08936	7.44629	7.32422	7.08008	6.16455	7.14111	6.28662	5.98144	5.7373	5.98144	5.92041	0	0.0305176	0	0	0	-30.5176	0	0	-0.0915527	0	0
19.8	4.08936	7.38525	7.20215	7.08008	6.22559	7.20215	6.34766	5.98144	5.7373	6.04248	5.92041	0.0305176	-0.0305176	-0.0305176	0	0	-30.5176	-0.0610352	0	-0.0610352	0	-0.0305176
19.9	4.15039	7.44629	7.14111	7.01904	6.28662	7.32422	6.34766	5.98144	5.79834	6.10352	5.92041	0.0610352	-0.0305176	-0.0305176	0.0305176	-0.0305176	30.5176	-0.0305176	0	-0.0610352	0	-0.0305176
20	4.15039	7.44629	7.08008	7.01904	6.16455	7.38525	6.46973	6.04248	5.79834	6.10352	5.85937	-0.0305176	-0.0305176	0	0	-0.0305176	0	0	-0.0305176	-0.0305176	-0.0305176	0.0305176
20.1	4.21143	7.44629	7.14111	7.01904	6.04248	7.26318	6.5918	6.04248	5.92041	5.98144	5.85937	0	-0.0305176	0	0	-0.0305176	-30.5176	0	-0.0305176	0	0.0305176	0
20.2	4.21143	7.44629	7.14111	7.01904	5.98144	7.14111	6.53076	6.04248	5.98144	5.85937	5.85937	0	-0.0610352	0	-0.0305176	0	0	0	-0.0610352	-0.0610352	0	-0.0305176
20.3	4.21143	7.50732	7.20215	7.01904	5.98144	7.01904	6.40869	5.98144	6.04248	5.7373	5.92041	0	0	0.0610352	-0.0305176	0	-61.0352	-0.0305176	-0.0610352	0	0.0305176	-0.0610352
20.4	4.21143	7.50732	7.26318	7.01904	5.98144	6.95801	6.28662	5.85937	6.16455	5.67627	5.98144	0	-0.0610352	0	0.0305176	0.0305176	-61.0352	-0.0610352	0	-0.0305176	-0.0305176	0.0305176
20.5	4.08936	7.56836	7.32422	7.01904	6.04248	7.01904	6.22559	5.79834	6.10352	5.7373	6.04248	0.0305176	-0.0305176	-0.0305176	-0.0305176	-0.0305176	-61.0352	-0.0305176	0.0305176	-0.0305176	-0.0305176	-0.0305176
20.6	4.02832	7.56836	7.38525	6.95801	6.04248	7.01904	6.16455	5.85937	5.98144	5.7373	6.10352	0.0305176	-0.0305176	-0.0610352	0.0305176	0	-61.0352	0	0	-0.0610352	-0.0305176	0.0305176
20.7	4.02832	7.50732	7.32422	6.95801	6.04248	7.08008	6.16455	5.92041	5.85937	5.7373	6.10352	0	-0.0305176	-0.0305176	0	-0.0305176	-30.5176	-0.0305176	0	0	-0.0610352	-0.0305176
20.8	4.08936	7.44629	7.26318	6.89697	5.98144	7.14111	6.22559	5.98144	5.7373	5.7373	5.92041	0	-0.0305176	-0.0610352	-0.0305176	-0.0610352	-30.5176	-0.0305176	-0.0305176	0	-0.0305176	-0.0305176
20.9	4.15039	7.50732	7.20215	6.89697	5.98144	7.14111	6.28662	6.04248	5.7373	5.7373	5.85937	-0.0305176	-0.0305176	-0.0305176	-0.0610352	0.0305176	30.5176	-0.0305176	-0.0610352	0	-0.0305176	0.0305176
21	4.08936	7.50732	7.14111	6.95801	5.92041	7.08008	6.34766	5.98144	5.79834	5.79834	5.79834	-0.0305176	0	0	-0.0610352	-0.0610352	30.5176	-0.0305176	-0.0610352	0.0305176	-0.0305176	-0.0610352
21.1	4.02832	7.50732	7.14111	6.95801	5.92041	7.08008	6.40869	5.98144	5.85937	5.85937	5.79834	-0.0305176	-0.0305176	-0.0305176	0	0.0305176	0	-0.0305176	-0.0610352	0	0.0305176	-0.0305176
21.2	4.02832	7.44629	7.20215	6.89697	5.98144	7.08008	6.40869	5.92041	5.92041	5.85937	5.79834	-0.0305176	0.0305176	0	0	-0.0305176	-30.5176	-0.0305176	0	-0.0305176	0	-0.0915527
21.3	4.02832	7.38525	7.26318	6.89697	6.10352	7.14111	6.40869	5.92041	5.85937	5.92041	5.85937	0	0	0	-0.0305176	-0.0305176	-30.5176	-0.0305176	0	-0.0610352	-0.0305176	0
21.4	4.02832	7.44629	7.32422	6.89697	6.16455	7.26318	6.40869	5.85937	5.79834	5.92041	5.79834	0	0.0305176	-0.0610352	0	-0.0305176	-30.5176	0.0305176	0	-0.0610352	-0.0305176	0.0305176
21.5	4.02832	7.44629	7.32422	6.95801	6.22559	7.26318	6.46973	5.79834	5.79834	5.85937	5.85937	-0.0305176	-0.0305176	0.0305176	-0.0305176	0	0	-0.0610352	-0.0305176	0	-0.0610352	0.0305176
21.6	4.02832	7.44629	7.32422	6.95801	6.22559	7.32422	6.46973	5.85937	5.79834	5.85937	5.92041	0	-0.0305176	-0.0305176	-0.0305176	-0.0610352	-30.5176	-0.0305176	0.0305176	0	0	0
21.7	4.08936	7.32422	7.32422	6.95801	6.10352	7.38525	6.53076	5.92041	5.79834	5.92041	5.98144	-0.0305176	-0.0305176	0	-0.0610352	-0.0305176	-30.5176	-0.0610352	0	0	-0.0610352	-0.0915527
21.8	4.15039	7.32422	7.32422	7.01904	6.04248	7.38525	6.53076	6.04248	5.79834	5.92041	6.04248	-0.0305176	-0.0305176	0	-0.0305176	0	-61.0352	0	0	0.0305176	0	-0.0610352
21.9	4.21143	7.38525	7.26318	7.01904	5.98144	7.38525	6.53076	6.16455	5.79834	5.98144	6.04248	-0.0610352	-0.0305176	-0.0305176	-0.0305176	-0.0305176	-30.5176	0.0305176	0	-0.0305176	0	0
22	4.27246	7.44629	7.26318	7.01904	5.98144	7.26318	6.53076	6.16455	5.7373	5.98144	6.04248	0.0305176	0	-0.0305176	0.0305176	0	30.5176	0.0305176	-0.0305176	0.0305176	0	-0.0305176
22.1	4.27246	7.50732	7.32422	7.01904	6.04248	7.20215	6.53076	6.16455	5.7373	6.04248	5.98144	0.0305176	-0.0610352	0	0	-0.0305176	0	0	0	-0.0610352	0.0305176	0.0305176
22.2	4.21143	7.50732	7.38525	6.95801	6.16455	7.14111	6.46973	6.10352	5.67627	6.04248	5.98144	0.0305176	-0.0305176	0	0	0	0	0.0305176	0	0	0	-0.0305176
22.3	4.21143	7.50732	7.44629	6.89697	6.28662	7.14111	6.40869	6.10352	5.67627	6.04248	5.92041	0	0.0610352	-0.0305176	0	-0.0305176	-30.5176	-0.0305176	0.0305176	-0.0305176	-0.0305176	0.0305176
22.4	4.21143	7.50732	7.44629	6.89697	6.28662	7.20215	6.34766	6.10352	5.67627	6.04248	5.85937	-0.0610352	-0.0305176	0	-0.0305176	-0.0305176	-61.0352	0	0	0	-0.0610352	0.0305176
22.5	4.21143	7.44629	7.38525	6.95801	6.28662	7.20215	6.34766	6.10352	5.67627	5.98144	5.92041	-0.12207	-0.0305176	-0.0305176	-0.0305176	-0.0305176	0	0.0305176	-0.0305176	0	-0.0610352	0
22.6	4.27246	7.38525	7.32422	6.95801	6.22559	7.20215	6.34766	6.16455	5.79834	5.92041	5.92041	-0.0305176	-0.0305176	0	0	0	0	0.0305176	-0.0915527	0.0305176	-0.0610352	0
22.7	4.27246	7.32422	7.20215	6.95801	6.22559	7.20215	6.40869	6.16455	5.85937	5.85937	5.85937	-0.0610352	-0.0915527	-0.0305176	-0.0305176	-0.0305176	0	0.0610352	-0.0305176	0	-0.0305176	-0.0305176
22.8	4.27246	7.32422	7.08008	6.95801	6.22559	7.14111	6.46973	6.16455	5.92041	5.92041	5.79834	0	-0.0305176	-0.0610352	0	0.0305176	0	-0.0305176	-0.0610352	-0.0305176	-0.0610352	-0.0610352
22.9	4.3335	7.38525	7.14111	7.01904	6.22559	7.14111	6.46973	6.10352	5.92041	5.85937	5.67627	0	-0.0305176	-0.0610352	0.0305176	0	-30.5176	0	0	-0.0305176	-0.0305176	0
23	4.3335	7.44629	7.20215	7.01904	6.22559	7.14111	6.40869	6.10352	5.98144	5.85937	5.67627	-0.0305176	0	-0.0610352	0.0305176	-0.0305176	-30.5176	0	0.0305176	0	0	0
23.1	4.39453	7.50732	7.20215	7.01904	6.16455	7.20215	6.34766	6.04248	5.98144	5.85937	5.7373	-0.0305176	-0.0305176	-0.0305176	0.0610352	0	61.0352	-0.0305176	0	0.0305176	-0.0305176	0.0305176
23.2	4.39453	7.50732	7.26318	7.01904	6.10352	7.20215	6.34766	6.10352	5.92041	5.79834	5.7373	-0.0305176	-0.0610352	-0.0305176	0	-0.0305176	0	0	0	0	-0.0610352	0
23.3	4.39453	7.50732	7.26318	6.95801	6.10352	7.26318	6.34766	6.10352	5.92041	5.79834	5.79834	-0.0305176	-0.0305176	-0.0305176	0	0	0	-0.0610352	0	0	-0.0305176	-0.0305176
23.4	4.3335	7.44629	7.32422	7.01904	6.10352	7.32422	6.40869	6.16455	5.79834	5.79834	5.85937	-0.0305176	-0.0610352	-0.0305176	-0.0305176	0	-30.5176	-0.0305176	-0.0610352	0	-0.0610352	-0.0305176
23.5	4.3335	7.44629	7.32422	7.01904	6.10352	7.32422	6.46973	6.22559	5.79834	5.79834	5.92041	-0.0610352	0	-0.0305176	0	-0.0305176	0	0	-0.0610352	0	-0.0610352	-0.0610352
23.6	4.3335	7.44629	7.26318	7.08008	6.10352	7.32422	6.53076	6.16455	5.7373	5.79834	5.98144	-0.0610352	0.0305176	0	0.0610352	-0.0610352	30.5176	0.0305176	0	0.0305176	0	0.0305176
23.7	4.39453	7.44629	7.26318	7.14111	6.16455	7.32422	6.53076	6.16455	5.7373	5.85937	6.04248	-0.0610352	0	-0.0305176	0.0305176	-0.0305176	-30.5176	-0.0305176	-0.0305176	-0.0305176	-0.0305176	0.0305176
23.8	4.39453	7.38525	7.26318	7.20215	6.16455	7.26318	6.53076	6.04248	5.7373	5.85937	6.04248	-0.0305176	-0.0305176	-0.0305176	-0.0305176	0	-30.5176	-0.0305176	0.0610352	-0.0610352	-0.0305176	0.0305176
23.9	4.39453	7.32422	7.26318	7.14111	6.10352	7.20215	6.53076	6.04248	5.67627	5.85937	5.98144	-0.0305176	-0.0305176	-0.0305176	0	-0.0610352	-61.0352	-0.0305176	-0.0305176	-0.0610352	-0.0610352	-0.0305176
24	4.39453	7.32422	7.26318	7.14111	6.04248	7.14111	6.40869	5.98144	5.67627	5.79834	5.92041	-0.0305176	-0.0305176	-0.0610352	0.0610352	0	-30.5176	-0.0305176	-0.0305176	-0.0305176	-0.0610352	-0.0610352
24.1	4.39453	7.32422	7.26318	7.08008	6.04248	7.01904	6.34766	5.98144	5.67627	5.79834	5.85937	-0.0610352	-0.0305176	-0.0610352	0.0305176	-0.0305176	0	0.0305176	0.0305176	0.0610352	0	0
24.2	4.39453	7.26318	7.26318	7.01904	6.10352	6.95801	6.34766	5.98144	5.67627	5.79834	5.79834	-0.0610352	0	-0.0915527	0.0610352	-0.0610352	61.0352	0.0305176	-0.0305176	0.0305176	0	0.0305176
24.3	4.39453	7.20215	7.26318	7.01904	6.10352	6.83594	6.34766	5.98144	5.67627	5.79834	5.79834	-0.0610352	-0.0610352	0	0.0305176	0.0305176	61.0352	-0.0305176	0	0.0305176	0	0
24.4	4.39453	7.14111	7.38525	7.08008	6.10352	6.89697	6.34766	5.98144	5.7373	5.85937	5.79834	-0.0305176	-0.0305176	-0.0305176	0.0305176	0.0610352	0	-0.0610352	-0.0305176	-0.0305176	0.0305176	-0.0305176
24.5	4.3335	7.08008	7.44629	7.14111	6.10352	6.89697	6.34766	5.98144	5.85937	5.92041	5.85937	0.0305176	-0.0610352	-0.0305176	0.0305176	0.0305176	0	-0.0915527	-0.0610352	-0.0305176	-0.0305176	-0.0305176
24.6	4.3335	7.08008	7.50732	7.14111	6.10352	6.89697	6.34766	6.04248	5.92041	5.98144	5.92041	0	0	-0.0610352	0.0610352	-0.0610352	-61.0352	0.0610352	0	0	0	0
24.7	4.3335	7.14111	7.50732	7.20215	6.10352	6.89697	6.28662	6.16455	5.98144	6.04248	5.98144	-0.12207	-0.0305176	-0.152588	0.0305176	-0.0305176	0	0	0.0305176	0	-0.0305176	0.0915527
24.8	4.3335	7.14111	7.50732	7.14111	6.10352	6.95801	6.34766	6.28662	5.92041	6.04248	6.04248	-0.0915527	-0.0305176	-0.0915527	0.0305176	-0.0305176	61.0352	0	0.0305176	0.0305176	-0.0610352	0.0610352
24.9	4.39453	7.20215	7.50732	7.14111	6.10352	7.01904	6.40869	6.34766	5.85937	5.98144	6.10352	-0.0915527	-0.0915527	-0.0610352	0	-0.0305176	0	-0.0915527	0	0.0610352	-0.0610352	0
25	4.45557	7.26318	7.44629	7.08008	6.10352	6.95801	6.46973	6.40869	5.7373	5.92041	6.10352	-0.0610352	-0.0915527	-0.0305176	0	-0.0305176	0	-0.0610352	-0.0305176	0.0305176	-0.0610352	-0.0305176
25.1	4.5166	7.32422	7.50732	7.01904	6.16455	6.95801	6.5918	6.34766	5.61523	5.79834	6.10352	-0.0610352	-0.0305176	-0.0305176	0.0305176	0.0305176	0	-0.0305176	-0.0610352	-0.0305176	-0.0610352	-0.0915527
25.2	4.57764	7.32422	7.56836	6.89697	6.16455	6.89697	6.65283	6.28662	5.61523	5.7373	6.10352	-0.0610352	-0.0305176	-0.0305176	0.0305176	0.0305176	0	0.0305176	-0.0610352	0.0305176	0	-0.0305176
25.3	4.63867	7.26318	7.62939	6.83594	6.16455	6.83594	6.65283	6.16455	5.61523	5.7373	6.10352	-0.0610352	0	-0.0610352	0.0305176	0	30.5176	0	-0.0305176	0.0305176	-0.0305176	0.0305176
25.4	4.63867	7.20215	7.56836	6.83594	6.16455	6.83594	6.5918	6.10352	5.67627	5.79834	6.04248	-0.0610352	-0.0305176	-0.0305176	0	0	0	0	0	-0.0305176	0	0.0305176
25.5	4.63867	7.14111	7.50732	6.95801	6.16455	6.83594	6.46973	6.10352	5.7373	5.92041	5.98144	0	-0.0305176	-0.0610352	-0.0305176	0.0305176	-30.5176	-0.0305176	0.0305176	-0.0305176	-0.0610352	0
25.6	4.63867	7.14111	7.44629	7.08008	6.22559	6.89697	6.34766	6.10352	5.7373	5.98144	5.98144	0.0305176	0	-0.0305176	0.0305176	0	-91.5527	-0.0610352	-0.0305176	0	-0.0610352	-0.0610352
25.7	4.63867	7.20215	7.38525	7.08008	6.16455	6.89697	6.28662	6.04248	5.79834	6.04248	5.98144	-0.0305176	-0.0610352	0	0	0.0610352	-30.5176	0	-0.0610352	0	-0.12207	0
25.8	4.63867	7.20215	7.32422	7.01904	6.16455	6.89697	6.22559	5.98144	5.79834	6.04248	5.92041	-0.0915527	0	-0.0610352	0	-0.0305176	30.5176	0	0.0305176	0.0610352	-0.0610352	0.0610352
25.9	4.57764	7.20215	7.32422	7.01904	6.10352	6.95801	6.22559	5.98144	5.85937	6.10352	5.92041	-0.0610352	-0.0305176	-0.0610352	0.0305176	-0.0610352	61.0352	0.0305176	0	0.0610352	-0.0305176	0
26	4.5166	7.20215	7.38525	6.95801	6.10352	6.95801	6.22559	5.98144	5.85937	6.16455	5.92041	-0.0610352	-0.0305176	-0.0305176	0	0	-61.0352	0.0305176	0.0305176	0.0305176	0	0
26.1	4.5166	7.20215	7.38525	6.89697	6.04248	6.89697	6.28662	6.04248	5.85937	6.22559	5.85937	-0.0305176	-0.0305176	-0.0305176	0	0	0	0	0	0	0	-0.0305176
26.2	4.45557	7.26318	7.38525	6.89697	6.04248	6.89697	6.28662	6.04248	5.85937	6.22559	5.85937	-0.0610352	-0.0305176	-0.0610352	0.0305176	0.0305176	-30.5176	0	0	0	-0.0610352	-0.0305176
26.3	4.5166	7.26318	7.44629	6.89697	5.98144	6.95801	6.34766	6.04248	5.85937	6.22559	5.85937	-0.0305176	0	-0.0305176	-0.0305176	-0.0305176	-30.5176	0	0	0	-0.0305176	0
26.4	4.5166	7.26318	7.50732	6.83594	6.04248	7.01904	6.40869	6.04248	5.79834	6.10352	5.85937	-0.0305176	-0.0305176	-0.0610352	0	-0.0305176	0	-0.0305176	0.0915527	0.0610352	0	0
26.5	4.57764	7.26318	7.56836	6.83594	6.04248	7.08008	6.40869	6.04248	5.7373	6.10352	5.85937	-0.0610352	-0.0610352	-0.0305176	0	-0.0915527	30.5176	-0.0305176	0	0	-0.0305176	0.0610352
26.6	4.63867	7.26318	7.62939	6.89697	6.04248	7.08008	6.40869	6.04248	5.7373	5.98144	5.85937	-0.0915527	0	0.0305176	0	0	0	-0.0610352	0.0305176	0	-0.0610352	-0.0915527
26.7	4.63867	7.20215	7.62939	6.89697	6.04248	7.01904	6.40869	6.10352	5.7373	5.98144	5.85937	0.0305176	-0.0305176	-0.0305176	0	0.0610352	-30.5176	0	-0.0610352	0	-0.0915527	-0.0610352
26.8	4.57764	7.20215	7.62939	6.89697	6.10352	6.95801	6.46973	6.04248	5.7373	5.98144	5.85937	-0.0305176	-0.0305176	-0.0305176	0	0	0	0.0305176	-0.0610352	0.0305176	-0.152588	0
26.9	4.5166	7.20215	7.56836	6.95801	6.22559	6.95801	6.46973	6.04248	5.7373	6.04248	5.85937	0	0	-0.0610352	0	0	-30.5176	0.0305176	-0.0305176	0.0305176	-0.0610352	0
27	4.45557	7.20215	7.56836	6.95801	6.22559	7.01904	6.53076	5.98144	5.7373	6.04248	5.85937	0	0.0305176	0	0	0	0	0.0305176	-0.0305176	-0.0305176	0.0305176	0.0610352
27.1	4.39453	7.26318	7.56836	7.01904	6.16455	7.01904	6.53076	5.98144	5.67627	6.04248	5.85937	0.0305176	-0.0305176	-0.0305176	-0.0305176	-0.0305176	-30.5176	-0.0305176	0.0305176	0	0	0.0305176
27.2	4.39453	7.26318	7.50732	6.95801	6.04248	7.08008	6.46973	5.92041	5.61523	6.04248	5.85937	-0.0305176	-0.0610352	-0.0305176	0	-0.0305176	0	-0.0915527	0.0305176	-0.0305176	0	0
27.3	4.45557	7.32422	7.50732	6.95801	5.98144	7.08008	6.40869	5.92041	5.67627	6.10352	5.92041	0	-0.0305176	-0.0610352	0.0305176	0	-61.0352	-0.0610352	0	0	-0.0915527	-0.0915527
27.4	4.5166	7.32422	7.44629	6.95801	5.92041	7.08008	6.28662	5.98144	5.67627	6.16455	5.92041	-0.0305176	-0.0305176	0.0305176	-0.0305176	-0.0305176	0	-0.0305176	-0.0305176	-0.0305176	-0.0915527	-0.0305176
27.5	4.57764	7.32422	7.38525	6.95801	5.92041	7.01904	6.22559	6.04248	5.67627	6.16455	5.92041	-0.0305176	0.0305176	0.0305176	-0.0305176	-0.0305176	61.0352	0.0305176	-0.0610352	-0.0305176	-0.0305176	0.0305176
27.6	4.57764	7.32422	7.38525	6.95801	5.98144	6.95801	6.22559	6.04248	5.67627	6.16455	5.98144	0	0.0305176	0	0	-0.0305176	61.0352	0	-0.0610352	0.0305176	0	-0.0305176
27.7	4.5166	7.32422	7.38525	6.89697	6.04248	6.95801	6.28662	6.04248	5.67627	6.10352	5.98144	0	0.0305176	0	0	0.0305176	0	0	0.0305176	0	-0.0610352	0
27.8	4.45557	7.32422	7.38525	6.89697	6.04248	6.95801	6.34766	6.04248	5.67627	6.04248	6.04248	0.0305176	0	-0.0610352	0	0.0305176	0	0	0	-0.0305176	-0.0305176	-0.0305176
27.9	4.3335	7.26318	7.38525	6.89697	6.10352	7.01904	6.34766	6.04248	5.67627	6.04248	5.98144	0.0305176	0	-0.0305176	0.0305176	-0.0305176	0	-0.0305176	-0.0305176	-0.0610352	0	0
28	4.39453	7.20215	7.32422	6.89697	6.10352	7.01904	6.34766	6.10352	5.67627	6.04248	5.98144	-0.0305176	0	-0.0610352	0.0305176	0.0305176	-61.0352	-0.0305176	-0.0610352	0	0	0.0305176
28.1	4.57764	7.20215	7.14111	6.89697	6.10352	7.08008	6.40869	6.16455	5.7373	5.98144	5.92041	-0.0305176	-0.0305176	-0.0305176	0	-0.0305176	0	-0.0305176	0.0305176	0.0305176	-0.0305176	0
28.2	4.69971	7.32422	7.14111	6.83594	6.10352	7.08008	6.46973	6.22559	5.7373	5.98144	5.85937	0	-0.0610352	0.0305176	-0.0305176	0	0	-0.0305176	-0.0305176	-0.0305176	-0.0305176	0
28.3	4.69971	7.32422	7.26318	6.89697	6.04248	7.08008	6.46973	6.28662	5.67627	6.04248	5.85937	0.0305176	-0.0305176	0.0305176	-0.0305176	0	-30.5176	-0.0610352	-0.0305176	0	0	0
28.4	4.63867	7.32422	7.38525	6.95801	5.98144	7.08008	6.46973	6.28662	5.61523	6.10352	5.85937	-0.0305176	-0.0305176	-0.0305176	-0.0305176	-0.0305176	0	0	-0.0305176	0	-0.0610352	0.0305176
28.5	4.57764	7.26318	7.44629	7.01904	6.04248	6.95801	6.46973	6.22559	5.61523	6.16455	5.85937	0.0305176	0	-0.0305176	0	0	-30.5176	0.0305176	-0.0305176	-0.0305176	-0.0305176	-0.0305176
28.6	4.57764	7.20215	7.38525	7.01904	6.04248	6.95801	6.40869	6.16455	5.5542	6.22559	5.92041	-0.0305176	-0.0305176	0	0.0305176	0	-30.5176	-0.0610352	-0.0305176	0.0305176	-0.0305176	-0.0305176
28.7	4.57764	7.14111	7.38525	7.01904	6.04248	7.01904	6.34766	6.04248	5.5542	6.28662	5.92041	0	0	-0.0305176	0.0305176	-0.0610352	-61.0352	0	-0.0305176	-0.0305176	-0.0305176	0
28.8	4.57764	7.14111	7.38525	6.95801	6.04248	7.08008	6.40869	5.92041	5.49316	6.34766	5.98144	0	-0.0305176	0.0305176	0.0305176	-0.0305176	-61.0352	0.0305176	-0.0305176	-0.0305176	-0.0305176	0.0305176
28.9	4.57764	7.20215	7.44629	6.95801	5.98144	7.14111	6.46973	5.98144	5.43213	6.28662	5.98144	-0.0305176	-0.0305176	0	0	-0.0610352	0	-0.0305176	0	0.0305176	0.0610352	0.0610352
29	4.57764	7.32422	7.56836	6.95801	5.92041	7.14111	6.46973	6.10352	5.43213	6.22559	5.98144	-0.0305176	-0.0915527	0	0	-0.0305176	-30.5176	-0.0610352	-0.0305176	0	-0.0305176	-0.0305176
29.1	4.5166	7.38525	7.56836	7.01904	5.85937	7.14111	6.40869	6.16455	5.5542	6.16455	5.85937	-0.0305176	-0.0305176	-0.0305176	-0.0305176	0.0610352	0	-0.0610352	-0.0305176	-0.0915527	-0.0305176	0.0305176
29.2	4.5166	7.44629	7.62939	7.08008	5.85937	7.08008	6.28662	6.16455	5.61523	6.16455	5.79834	0.0610352	0	-0.0305176	0.0610352	0	0	0.0610352	-0.0305176	0	-0.0305176	-0.0305176
29.3	4.45557	7.50732	7.62939	7.14111	5.85937	7.08008	6.16455	6.10352	5.67627	6.22559	5.85937	-0.0305176	0	0.0305176	-0.0305176	-0.0305176	-30.5176	0.0305176	-0.0305176	-0.0610352	-0.0305176	-0.0305176
29.4	4.39453	7.50732	7.56836	7.14111	5.92041	7.08008	6.10352	6.10352	5.67627	6.28662	5.92041	0	0.0305176	-0.0305176	0.0305176	0	-61.0352	-0.0305176	-0.0610352	-0.0305176	-0.0305176	0
29.5	4.39453	7.44629	7.56836	7.20215	6.04248	7.14111	6.04248	6.04248	5.67627	6.28662	5.98144	0	-0.0610352	-0.0305176	0.0305176	-0.0305176	0	0	0	0.0305176	0	0
29.6	4.3335	7.38525	7.50732	7.20215	6.10352	7.14111	6.10352	6.10352	5.67627	6.28662	5.98144	-0.0305176	0	-0.0915527	0	-0.0610352	-30.5176	-0.0610352	0	-0.0610352	-0.0305176	0
29.7	4.39453	7.32422	7.44629	7.20215	6.16455	7.14111	6.22559	6.10352	5.67627	6.28662	5.92041	-0.0305176	0	-0.0305176	0	-0.0305176	-30.5176	-0.0610352	0.0305176	0	0	0
29.8	4.39453	7.32422	7.38525	7.20215	6.22559	7.08008	6.28662	6.10352	5.67627	6.28662	5.92041	0	-0.0610352	0.0305176	-0.0610352	-0.0305176	-61.0352	-0.0610352	0.0610352	0.0305176	-0.0305176	0.0305176
29.9	4.39453	7.32422	7.32422	7.14111	6.28662	7.08008	6.34766	6.10352	5.67627	6.22559	5.92041	-0.0610352	-0.0305176	0.0305176	-0.0305176	0	0	-0.0610352	-0.0305176	0	0	-0.0305176
30	4.3335	7.38525	7.32422	7.14111	6.28662	7.01904	6.40869	6.04248	5.61523	6.28662	5.92041	-0.0305176	-0.0610352	0	-0.0305176	0.0610352	30.5176	0	0	0.0305176	-0.0305176	0
30.1	4.27246	7.38525	7.26318	7.08008	6.28662	7.01904	6.46973	5.92041	5.61523	6.28662	5.92041	-0.0305176	-0.0305176	0	0	0	0	0	0	-0.0305176	0	-0.0610352
30.2	4.21143	7.44629	7.20215	7.08008	6.34766	6.95801	6.46973	5.85937	5.61523	6.28662	5.98144	0	0.0305176	0	0	0	-30.5176	0.0305176	0.0610352	-0.0305176	-0.0305176	-0.0305176
30.3	4.21143	7.38525	7.26318	7.08008	6.28662	6.89697	6.46973	5.85937	5.61523	6.28662	5.92041	0.0305176	0	-0.0610352	0	-0.0610352	-61.0352	0	0	-0.0305176	0.0305176	-0.0610352
30.4	4.21143	7.32422	7.32422	7.08008	6.22559	6.89697	6.46973	5.85937	5.61523	6.22559	5.92041	0	0.0305176	0	0	0	-61.0352	-0.0305176	0.0610352	0	-0.0305176	-0.0305176
30.5	4.27246	7.32422	7.38525	7.01904	6.16455	7.01904	6.46973	5.85937	5.61523	6.22559	5.85937	0.0305176	0	0	-0.0305176	-0.0305176	-61.0352	-0.0305176	-0.0305176	0	-0.0610352	-0.0610352
30.6	4.27246	7.32422	7.44629	7.01904	6.22559	7.14111	6.46973	5.92041	5.67627	6.22559	5.79834	0.0305176	-0.0610352	0	0.0305176	-0.0305176	-30.5176	-0.0305176	0.0305176	-0.0305176	-0.0610352	-0.0305176
30.7	4.3335	7.32422	7.44629	7.08008	6.28662	7.26318	6.53076	5.98144	5.7373	6.22559	5.7373	0	0.0305176	0	-0.0305176	0	0	-0.0305176	0	0	0	0
30.8	4.39453	7.38525	7.50732	7.14111	6.34766	7.32422	6.53076	5.98144	5.85937	6.16455	5.7373	0	0	0	0.0305176	0.0610352	0	-0.0305176	0.0305176	-0.0610352	-0.0305176	-0.0610352
30.9	4.45557	7.38525	7.50732	7.20215	6.40869	7.32422	6.53076	5.98144	5.85937	6.16455	5.79834	-0.0305176	0.0305176	0.0305176	-0.0305176	0	-30.5176	0	-0.0305176	-0.0610352	-0.0305176	-0.0305176
31	4.45557	7.32422	7.50732	7.26318	6.40869	7.20215	6.53076	5.98144	5.92041	6.16455	5.85937	0	0	0	-0.0610352	0.0305176	-30.5176	0.0305176	0.0305176	-0.0610352	-0.0305176	-0.0305176
31.1	4.39453	7.26318	7.50732	7.26318	6.40869	7.14111	6.53076	5.98144	5.85937	6.22559	5.85937	0	0.0305176	0.0305176	0	-0.0305176	-61.0352	-0.0305176	-0.0305176	-0.0915527	-0.0305176	-0.0305176
31.2	4.27246	7.26318	7.50732	7.20215	6.34766	7.08008	6.46973	6.04248	5.79834	6.28662	5.85937	0.0305176	0.0305176	-0.0305176	-0.0915527	-0.0305176	30.5176	0.0610352	-0.0305176	-0.0305176	0.0305176	0
31.3	4.21143	7.26318	7.56836	7.20215	6.28662	6.95801	6.46973	6.04248	5.7373	6.28662	5.79834	0	0	-0.0610352	0	-0.0305176	-30.5176	0	-0.0305176	0.0305176	0	0
31.4	4.21143	7.32422	7.56836	7.14111	6.28662	6.95801	6.46973	6.10352	5.67627	6.34766	5.7373	0	0	0	-0.12207	-0.0305176	-30.5176	-0.0305176	0	0	-0.0305176	0
31.5	4.27246	7.32422	7.56836	7.14111	6.34766	6.95801	6.40869	6.10352	5.67627	6.40869	5.67627	0	0	0.0305176	-0.0610352	0	0	-0.0305176	-0.0610352	-0.0610352	-0.0915527	-0.0610352
31.6	4.3335	7.38525	7.62939	7.20215	6.34766	7.01904	6.34766	6.16455	5.7373	6.46973	5.67627	0	0.0305176	0	-0.0610352	0.0305176	0	0.0305176	-0.0915527	-0.0305176	-0.0610352	-0.0305176
31.7	4.27246	7.38525	7.62939	7.26318	6.40869	7.01904	6.34766	6.10352	5.85937	6.40869	5.7373	0	-0.0305176	0.0305176	-0.0610352	-0.0305176	0	0	-0.0610352	0	-0.0305176	0
31.8	4.27246	7.38525	7.56836	7.32422	6.34766	7.01904	6.34766	6.10352	5.92041	6.34766	5.7373	0	0	0	-0.0305176	-0.0305176	0	0.0305176	0	0	0	0
31.9	4.21143	7.44629	7.56836	7.32422	6.28662	7.01904	6.40869	6.04248	5.92041	6.28662	5.7373	0	0.0915527	0	-0.0305176	-0.0305176	30.5176	-0.0305176	0	0	0.0305176	0
32	4.27246	7.44629	7.50732	7.32422	6.28662	7.01904	6.46973	5.98144	5.92041	6.28662	5.79834	0.0305176	0	-0.0305176	0	0	30.5176	-0.0610352	0	-0.0915527	-0.0305176	-0.0610352
32.1	4.21143	7.44629	7.50732	7.26318	6.28662	7.08008	6.46973	6.04248	5.79834	6.34766	5.92041	-0.0305176	0	-0.0305176	-0.0305176	-0.0305176	-61.0352	-0.0610352	-0.0305176	-0.0610352	0	-0.0610352
32.2	4.21143	7.44629	7.56836	7.20215	6.34766	7.08008	6.46973	6.10352	5.79834	6.40869	5.92041	0.0305176	0	0	-0.0610352	0	-30.5176	-0.0305176	-0.0610352	0	-0.0305176	-0.0610352
32.3	4.21143	7.38525	7.56836	7.14111	6.34766	7.01904	6.46973	6.16455	5.79834	6.46973	5.92041	0.0305176	0	0.0305176	-0.0305176	-0.0305176	0	0.0610352	0	0	0.0305176	-0.0305176
32.4	4.15039	7.38525	7.69043	7.14111	6.34766	6.95801	6.53076	6.16455	5.85937	6.46973	5.98144	-0.0305176	0	0.0610352	-0.0610352	-0.0305176	30.5176	0	-0.0305176	0	0	-0.0305176
32.5	4.15039	7.32422	7.69043	7.20215	6.34766	6.95801	6.53076	6.22559	5.92041	6.46973	5.98144	0	-0.0305176	0.0305176	-0.0305176	0.0305176	0	0	0	0	0.0305176	-0.0305176
32.6	4.15039	7.32422	7.62939	7.20215	6.34766	6.95801	6.5918	6.16455	5.92041	6.46973	5.98144	0.0305176	0.0305176	0	-0.0610352	0	-61.0352	0	-0.0305176	-0.12207	-0.0305176	-0.0915527
32.7	4.15039	7.32422	7.56836	7.26318	6.28662	7.01904	6.65283	6.04248	5.98144	6.40869	5.92041	0.0305176	0.0305176	0.0305176	-0.0305176	0.0305176	30.5176	0	-0.0305176	-0.12207	0.0305176	0
32.8	4.21143	7.32422	7.50732	7.32422	6.28662	7.01904	6.71387	6.04248	5.98144	6.34766	5.92041	0.0305176	0	0	0	-0.0610352	-30.5176	0.0610352	-0.0305176	0	0.0610352	0.0305176
32.9	4.27246	7.32422	7.50732	7.32422	6.22559	6.95801	6.7749	5.98144	5.98144	6.34766	5.85937	0.0610352	-0.0305176	-0.0305176	0	-0.0610352	0	0	-0.0305176	0	0.0305176	0.0305176
33	4.3335	7.32422	7.50732	7.20215	6.22559	6.95801	6.7749	6.04248	5.92041	6.34766	5.85937	0	0	0	-0.0610352	-0.0610352	-61.0352	-0.0305176	0.0305176	-0.0305176	0.0610352	0.0305176
33.1	4.39453	7.32422	7.50732	7.08008	6.28662	6.95801	6.7749	5.98144	5.85937	6.28662	5.92041	0.0305176	-0.0610352	0.0305176	-0.0915527	0.0305176	-30.5176	-0.0610352	0	-0.0610352	0	-0.0305176
33.2	4.45557	7.32422	7.50732	7.08008	6.28662	6.95801	6.7749	5.92041	5.85937	6.22559	5.92041	-0.0305176	-0.0305176	0	-0.0610352	0.0305176	-61.0352	-0.0610352	-0.0610352	-0.0305176	-0.0610352	-0.0610352
33.3	4.39453	7.38525	7.44629	7.01904	6.34766	6.95801	6.7749	5.92041	5.79834	6.22559	5.85937	-0.0305176	0.0610352	0	0.0305176	0	-30.5176	-0.0305176	0	-0.0305176	-0.0610352	-0.0610352
33.4	4.39453	7.32422	7.44629	7.08008	6.40869	6.95801	6.71387	5.85937	5.79834	6.22559	5.79834	0	0.0305176	-0.0305176	0.0305176	-0.0610352	30.5176	0	0	0	0.0305176	-0.0305176
33.5	4.3335	7.32422	7.44629	7.08008	6.40869	6.95801	6.5918	5.92041	5.79834	6.28662	5.7373	0.0305176	0	0	0	-0.0610352	-30.5176	0.0305176	0.0305176	-0.0610352	0.0915527	0.0305176
33.6	4.27246	7.26318	7.50732	7.08008	6.34766	6.95801	6.40869	5.92041	5.79834	6.28662	5.7373	0.0305176	0	0.0305176	-0.0305176	-0.0305176	-30.5176	0	0	-0.0915527	0.0610352	0.0305176
33.7	4.21143	7.20215	7.50732	7.14111	6.28662	6.95801	6.34766	5.98144	5.85937	6.28662	5.7373	0.0305176	0	0	-0.0305176	-0.0305176	-61.0352	-0.0610352	-0.0305176	-0.0305176	0	-0.0305176
33.8	4.27246	7.20215	7.44629	7.14111	6.22559	6.95801	6.34766	6.10352	5.92041	6.28662	5.79834	0	-0.0305176	0.0610352	0	0	-30.5176	-0.0610352	0	-0.0305176	-0.0305176	-0.0610352
33.9	4.3335	7.20215	7.44629	7.20215	6.28662	6.95801	6.34766	6.16455	5.98144	6.28662	5.85937	0	-0.0305176	0	0	0.0305176	-30.5176	-0.0305176	-0.0305176	-0.0305176	-0.0610352	0
34	4.45557	7.26318	7.44629	7.20215	6.28662	6.95801	6.40869	6.10352	5.98144	6.28662	5.92041	0	-0.0305176	-0.0305176	-0.0610352	-0.0305176	0	-0.0305176	-0.0305176	-0.0305176	0.0305176	-0.0610352
34.1	4.5166	7.32422	7.50732	7.14111	6.34766	6.95801	6.46973	6.04248	5.98144	6.34766	5.92041	0	0	0	-0.0610352	-0.0305176	0	0	-0.0305176	-0.0305176	0.0610352	0
34.2	4.5166	7.38525	7.50732	7.14111	6.40869	6.95801	6.53076	5.98144	5.98144	6.28662	5.85937	0.0305176	0.0305176	-0.0305176	-0.0610352	0.0305176	-30.5176	-0.0610352	-0.0305176	-0.0610352	0	0
34.3	4.5166	7.38525	7.50732	7.14111	6.53076	7.01904	6.65283	5.92041	5.92041	6.28662	5.7373	-0.0305176	0	-0.0305176	-0.0305176	0.0305176	-61.0352	-0.0305176	-0.0610352	-0.0915527	0	0
34.4	4.5166	7.32422	7.50732	7.14111	6.5918	7.08008	6.71387	5.92041	5.92041	6.22559	5.61523	-0.0305176	0.0305176	-0.0305176	0.0305176	0.0305176	-91.5527	-0.0305176	-0.0305176	-0.0610352	-0.0305176	0.0305176
34.5	4.57764	7.32422	7.44629	7.20215	6.65283	7.14111	6.71387	5.98144	5.92041	6.28662	5.49316	0.0610352	0	-0.0305176	0	-0.0610352	-30.5176	0	0	-0.0305176	0	0
34.6	4.57764	7.26318	7.38525	7.20215	6.5918	7.26318	6.65283	6.04248	5.98144	6.34766	5.49316	0.0305176	0	-0.0305176	0	-0.0610352	0	0.0305176	0.0305176	0.0305176	0	0.0610352
34.7	4.57764	7.26318	7.38525	7.26318	6.53076	7.32422	6.71387	6.10352	6.04248	6.40869	5.49316	0.0305176	-0.0305176	0.0610352	-0.0610352	0	-30.5176	0	0.0305176	0	0	0
34.8	4.5166	7.32422	7.32422	7.26318	6.53076	7.32422	6.71387	6.16455	6.10352	6.40869	5.5542	-0.0610352	0	0	-0.0610352	0.0305176	0	-0.0915527	0	0	0	-0.0610352
34.9	4.45557	7.32422	7.38525	7.26318	6.53076	7.20215	6.71387	6.10352	6.16455	6.40869	5.49316	0	-0.0305176	0	-0.0610352	0.0305176	-61.0352	-0.0610352	-0.0610352	-0.0610352	-0.0305176	-0.0915527
35	4.39453	7.38525	7.38525	7.20215	6.53076	7.14111	6.65283	6.10352	6.16455	6.40869	5.49316	0	0	0	-0.0305176	0	-61.0352	0	0	-0.0305176	-0.0305176	-0.0305176
35.1	4.39453	7.38525	7.44629	7.14111	6.53076	7.08008	6.5918	6.10352	6.16455	6.40869	5.49316	-0.0305176	0.0610352	-0.0305176	0	-0.0305176	0	0.0305176	-0.0305176	-0.0915527	0	-0.0305176
35.2	4.39453	7.38525	7.50732	7.08008	6.46973	7.01904	6.53076	6.16455	6.16455	6.40869	5.43213	-0.0305176	0.0305176	0	-0.0305176	0	30.5176	0.0305176	0	-0.0305176	0.0610352	0.0610352
35.3	4.39453	7.44629	7.62939	7.08008	6.40869	7.01904	6.46973	6.16455	6.10352	6.40869	5.43213	0.0305176	0.0305176	-0.0305176	0	-0.0610352	0	0	0	0	0	0
35.4	4.3335	7.44629	7.69043	7.08008	6.46973	7.08008	6.46973	6.04248	6.10352	6.40869	5.49316	0.0305176	0.0305176	0	-0.0610352	-0.0305176	-30.5176	-0.0305176	-0.0305176	-0.0305176	-0.0610352	-0.0610352
35.5	4.3335	7.50732	7.62939	7.08008	6.46973	7.14111	6.53076	5.98144	6.04248	6.40869	5.5542	-0.0610352	-0.0305176	0	-0.0915527	0.0610352	-30.5176	-0.0305176	-0.0610352	-0.0305176	-0.0915527	-0.0305176
35.6	4.21143	7.44629	7.62939	7.14111	6.53076	7.20215	6.5918	5.92041	5.98144	6.34766	5.61523	-0.0305176	0	0.0305176	0	0	0	0	-0.0305176	0	-0.0610352	-0.0915527
35.7	4.21143	7.38525	7.56836	7.20215	6.53076	7.26318	6.65283	5.92041	5.92041	6.28662	5.67627	-0.0305176	0	-0.0305176	-0.0305176	0.0305176	0	-0.0305176	0	0	0.0305176	-0.0305176
35.8	4.21143	7.32422	7.50732	7.20215	6.46973	7.32422	6.71387	5.92041	5.92041	6.22559	5.67627	-0.0610352	-0.0305176	0.0305176	-0.0610352	0	0	0	-0.0305176	0	0.0305176	-0.0305176
35.9	4.27246	7.32422	7.44629	7.14111	6.40869	7.26318	6.7749	5.98144	5.98144	6.22559	5.67627	-0.0305176	-0.0305176	-0.0305176	-0.0305176	-0.0610352	0	0.0305176	0	-0.0305176	0	-0.0305176
36	4.45557	7.38525	7.32422	7.14111	6.40869	7.26318	6.7749	6.04248	5.98144	6.22559	5.67627	-0.0305176	0.0610352	0	-0.0610352	-0.0610352	-30.5176	0	0.0305176	-0.0610352	-0.0305176	-0.0610352
36.1	4.45557	7.38525	7.26318	7.08008	6.40869	7.20215	6.71387	6.10352	6.04248	6.28662	5.67627	-0.0610352	0.0305176	0	0	0	-91.5527	0	0.0305176	-0.0610352	-0.0305176	-0.0305176
36.2	4.45557	7.38525	7.32422	7.08008	6.34766	7.14111	6.65283	6.10352	5.98144	6.28662	5.67627	-0.0305176	-0.0610352	-0.0305176	-0.0610352	0.0305176	-30.5176	0.0305176	-0.0305176	0	-0.0305176	-0.0305176
36.3	4.39453	7.32422	7.32422	7.20215	6.40869	7.14111	6.65283	6.04248	5.98144	6.22559	5.67627	0	-0.0305176	-0.0305176	-0.0305176	-0.0305176	30.5176	-0.0305176	0	0	-0.0305176	0
36.4	4.39453	7.26318	7.26318	7.32422	6.46973	7.14111	6.5918	5.92041	5.92041	6.22559	5.67627	-0.0305176	-0.0305176	0	-0.0610352	0	0	-0.0305176	0.0305176	0	-0.0305176	0
36.5	4.3335	7.20215	7.14111	7.26318	6.5918	7.14111	6.65283	5.85937	5.92041	6.22559	5.7373	-0.0610352	-0.0305176	0.0305176	-0.0305176	-0.0305176	0	0	-0.0305176	-0.0305176	-0.0305176	-0.0305176
36.6	4.3335	7.14111	7.14111	7.26318	6.5918	7.32422	6.65283	5.79834	5.92041	6.22559	5.7373	-0.0915527	0	-0.0305176	0.0610352	-0.0305176	-61.0352	0	-0.0305176	-0.0305176	0	-0.0305176
36.7	4.3335	7.14111	7.08008	7.20215	6.46973	7.38525	6.71387	5.79834	5.98144	6.22559	5.7373	-0.0305176	0	0	-0.0305176	0.0610352	0	-0.0305176	-0.0305176	0	-0.0305176	-0.0610352
36.8	4.3335	7.14111	7.14111	7.20215	6.40869	7.32422	6.7749	5.79834	6.04248	6.28662	5.7373	-0.0305176	-0.0305176	0	0.0305176	0	-30.5176	0.0610352	-0.0610352	-0.0305176	0	-0.0305176
36.9	4.3335	7.14111	7.14111	7.20215	6.40869	7.26318	6.71387	5.79834	6.04248	6.28662	5.79834	0	0	-0.0305176	-0.0305176	-0.0305176	0	0.0305176	-0.0305176	0	0	0.0610352
37	4.3335	7.14111	7.14111	7.20215	6.53076	7.20215	6.65283	5.79834	6.16455	6.28662	5.79834	0.0305176	-0.0305176	-0.0305176	0	-0.0305176	30.5176	-0.0305176	0	-0.0915527	0.0305176	0
37.1	4.39453	7.14111	7.14111	7.20215	6.5918	7.20215	6.53076	5.7373	6.16455	6.28662	5.79834	-0.0305176	-0.0610352	-0.0305176	0.0305176	-0.0610352	0	0.0305176	-0.0305176	0	0	0
37.2	4.39453	7.20215	7.14111	7.14111	6.65283	7.08008	6.53076	5.67627	6.04248	6.22559	5.85937	-0.0610352	-0.0305176	0.0305176	-0.0305176	-0.0305176	-30.5176	-0.0305176	-0.0305176	-0.0610352	-0.0305176	-0.0610352
37.3	4.45557	7.26318	7.20215	7.14111	6.71387	7.08008	6.5918	5.61523	5.92041	6.16455	5.92041	-0.0610352	-0.0305176	0	-0.0305176	0	-30.5176	0	-0.0610352	-0.0305176	-0.0610352	-0.0305176
37.4	4.39453	7.38525	7.26318	7.14111	6.71387	7.01904	6.5918	5.61523	5.79834	6.04248	5.92041	-0.0305176	-0.0305176	-0.0305176	0	0	-30.5176	0	-0.0610352	0	-0.0305176	-0.0305176
37.5	4.45557	7.44629	7.32422	7.14111	6.7749	7.01904	6.5918	5.7373	5.79834	5.98144	5.85937	0.0305176	-0.0610352	0	0.0305176	-0.0305176	-30.5176	0	0	0	0	0.0305176
37.6	4.5166	7.50732	7.38525	7.14111	6.7749	7.01904	6.53076	5.79834	5.79834	5.98144	5.7373	0.0305176	-0.0610352	-0.0305176	0.0610352	-0.0305176	0	0.0305176	0.0305176	0	0	0.0610352
37.7	4.45557	7.50732	7.38525	7.14111	6.71387	7.01904	6.53076	5.85937	5.79834	5.98144	5.67627	0	0	-0.0305176	0.0610352	-0.0305176	-61.0352	-0.0305176	0	-0.0610352	0.0305176	-0.0305176
37.8	4.39453	7.44629	7.32422	7.14111	6.65283	6.95801	6.53076	5.92041	5.85937	6.04248	5.67627	-0.0305176	-0.0305176	0	0	-0.0610352	-30.5176	0.0305176	-0.0305176	-0.0915527	-0.0305176	-0.0305176
37.9	4.27246	7.44629	7.26318	7.14111	6.5918	7.01904	6.53076	5.98144	5.85937	6.10352	5.67627	-0.0305176	0.0305176	0.0305176	-0.0305176	-0.0915527	30.5176	-0.0305176	0	-0.0305176	-0.0305176	-0.0305176
38	4.27246	7.44629	7.20215	7.08008	6.53076	7.01904	6.46973	5.98144	5.85937	6.16455	5.67627	-0.0305176	-0.0305176	-0.0305176	0	-0.0305176	0	0	-0.0610352	-0.0305176	-0.0915527	0
38.1	4.21143	7.44629	7.20215	7.08008	6.53076	7.08008	6.40869	5.98144	5.92041	6.22559	5.67627	-0.0305176	0	-0.0305176	0	0	30.5176	-0.0305176	-0.0305176	0	-0.0610352	0
38.2	4.27246	7.44629	7.14111	7.08008	6.53076	7.14111	6.28662	5.92041	5.92041	6.28662	5.7373	-0.0305176	0	-0.0610352	-0.0305176	0	30.5176	0	-0.0305176	0	0.0305176	0.0305176
38.3	4.27246	7.38525	7.08008	7.08008	6.53076	7.20215	6.28662	5.92041	5.92041	6.22559	5.7373	-0.0305176	-0.0305176	-0.0305176	0.0610352	0	0	-0.0610352	0	0	0	-0.0305176
38.4	4.3335	7.32422	6.95801	7.08008	6.46973	7.14111	6.40869	5.92041	5.98144	6.16455	5.7373	-0.0610352	0.0305176	-0.0305176	-0.0610352	-0.0305176	-30.5176	-0.0305176	0.0305176	0	0.0305176	-0.0305176
38.5	4.39453	7.26318	6.89697	7.08008	6.46973	7.08008	6.53076	5.92041	5.98144	6.10352	5.7373	-0.0305176	-0.0305176	-0.0305176	0	-0.0915527	-61.0352	0	0.0305176	-0.0305176	0	-0.0305176
38.6	4.3335	7.32422	6.83594	7.08008	6.46973	7.08008	6.65283	5.85937	5.98144	6.10352	5.7373	0	-0.0305176	0	0.0305176	0	0	-0.0305176	0	-0.0305176	0	-0.0610352
38.7	4.3335	7.38525	6.89697	7.08008	6.46973	7.14111	6.71387	5.85937	5.98144	6.16455	5.67627	0	-0.0305176	0	-0.0305176	0.0305176	-30.5176	0	0	-0.0305176	0	0
38.8	4.27246	7.38525	7.01904	7.08008	6.5918	7.14111	6.7749	5.85937	5.92041	6.16455	5.61523	0	-0.0610352	0	-0.0610352	0	-30.5176	-0.0305176	-0.0305176	0	-0.0305176	-0.0610352
38.9	4.3335	7.50732	7.08008	7.08008	6.65283	7.20215	6.7749	5.85937	5.92041	6.22559	5.49316	-0.0610352	-0.0305176	-0.0305176	0	0	-30.5176	-0.0610352	-0.0305176	0	-0.0305176	-0.0305176
39	4.39453	7.56836	7.20215	7.14111	6.71387	7.26318	6.71387	5.85937	5.85937	6.16455	5.43213	-0.0915527	-0.0610352	0.0305176	0	-0.0305176	61.0352	-0.0305176	-0.0305176	0	-0.0305176	-0.0610352
39.1	4.45557	7.56836	7.26318	7.20215	6.71387	7.20215	6.65283	5.85937	5.85937	6.10352	5.37109	-0.0305176	-0.0305176	-0.0305176	0.0305176	-0.0305176	-30.5176	-0.0305176	-0.0610352	0	0.0305176	0
39.2	4.45557	7.56836	7.26318	7.14111	6.71387	7.20215	6.65283	5.85937	5.85937	6.04248	5.31006	-0.0610352	-0.0305176	0	0.0305176	0.0610352	0	0	-0.0305176	0	-0.0305176	-0.0305176
39.3	4.45557	7.50732	7.26318	7.14111	6.65283	7.14111	6.5918	5.79834	5.92041	5.98144	5.24902	0	-0.0305176	-0.0610352	0	0	-61.0352	-0.0305176	-0.0305176	-0.0305176	0.0305176	0
39.4	4.45557	7.50732	7.20215	7.14111	6.5918	7.08008	6.53076	5.79834	5.92041	5.98144	5.31006	-0.0305176	-0.0610352	0	0	-0.0305176	-30.5176	0	0	-0.0610352	0	0.0305176
39.5	4.45557	7.50732	7.14111	7.14111	6.53076	7.01904	6.53076	5.79834	5.85937	6.04248	5.31006	-0.0305176	-0.0610352	0	0.0305176	-0.0610352	-61.0352	-0.0305176	-0.0305176	0	-0.0305176	0
39.6	4.45557	7.50732	7.08008	7.14111	6.46973	6.95801	6.53076	5.79834	5.79834	6.10352	5.31006	-0.0610352	-0.0305176	0	-0.0305176	-0.0610352	-61.0352	-0.0610352	-0.0305176	-0.0305176	-0.0305176	0
39.7	4.39453	7.44629	7.01904	7.08008	6.46973	6.95801	6.53076	5.79834	5.7373	6.16455	5.31006	-0.0305176	-0.0305176	0.0610352	0	0	-30.5176	-0.0305176	-0.0305176	0	-0.0915527	-0.0305176
39.8	4.39453	7.38525	6.95801	7.08008	6.46973	6.89697	6.53076	5.85937	5.7373	6.22559	5.24902	-0.0305176	-0.0305176	0	0.0305176	-0.0305176	-30.5176	-0.0305176	-0.0915527	-0.0305176	-0.0610352	0.0305176
39.9	4.27246	7.32422	6.95801	7.01904	6.53076	6.89697	6.5918	5.92041	5.7373	6.28662	5.24902	-0.0610352	-0.0305176	0	0.0305176	0	30.5176	-0.0305176	-0.0610352	0.0305176	-0.0305176	0
40	4.21143	7.26318	6.89697	6.95801	6.53076	6.95801	6.65283	5.92041	5.79834	6.34766	5.18799	-0.0305176	0	-0.0305176	0.0305176	-0.0610352	0	-0.0305176	0.0305176	0	-0.0305176	0
40.1	4.21143	7.26318	6.95801	6.89697	6.46973	7.01904	6.71387	5.92041	5.85937	6.34766	5.18799	0.0305176	-0.0610352	0	-0.0305176	-0.0305176	-30.5176	-0.0305176	0.0305176	-0.0305176	-0.0305176	0
40.2	4.27246	7.26318	7.01904	6.83594	6.46973	7.08008	6.71387	5.85937	5.85937	6.28662	5.18799	-0.0305176	0	0.0305176	-0.0305176	-0.0610352	0	-0.0915527	-0.0610352	-0.0305176	0.0305176	-0.0305176
40.3	4.27246	7.32422	7.01904	6.83594	6.40869	7.14111	6.7749	5.79834	5.79834	6.22559	5.18799	-0.0610352	-0.0305176	0.0305176	0	-0.0305176	-30.5176	0	-0.0610352	0	-0.0610352	-0.0610352
40.4	4.3335	7.38525	6.95801	6.83594	6.40869	7.14111	6.71387	5.67627	5.79834	6.10352	5.31006	-0.0610352	-0.0305176	0	0.0305176	0.0610352	0	-0.0610352	-0.0915527	0	0	0
40.5	4.39453	7.50732	6.95801	6.83594	6.40869	7.08008	6.71387	5.5542	5.7373	6.04248	5.31006	-0.0915527	-0.0305176	-0.0305176	0	0	61.0352	0	0	0.0610352	0	0
40.6	4.39453	7.56836	6.89697	6.83594	6.40869	7.01904	6.71387	5.49316	5.67627	5.98144	5.31006	-0.0305176	-0.0610352	0	-0.0305176	-0.0305176	30.5176	-0.0610352	0	0.0305176	-0.0305176	-0.0610352
40.7	4.39453	7.56836	6.89697	6.83594	6.40869	6.95801	6.5918	5.5542	5.61523	5.98144	5.24902	-0.0305176	0	0	0	-0.0305176	0	-0.0305176	-0.0610352	0	0	-0.0610352
40.8	4.27246	7.50732	6.89697	6.7749	6.40869	6.89697	6.53076	5.67627	5.61523	5.92041	5.18799	-0.0610352	0	-0.0610352	0.0305176	0	0	-0.0305176	-0.0305176	0.0305176	-0.0610352	-0.0610352
40.9	4.21143	7.44629	6.89697	6.71387	6.40869	6.89697	6.40869	5.7373	5.61523	5.98144	5.18799	-0.0915527	-0.0305176	-0.0305176	0.0305176	0	-30.5176	-0.0305176	-0.0305176	-0.0305176	-0.0305176	-0.0305176
41	4.15039	7.38525	6.83594	6.71387	6.40869	6.95801	6.28662	5.7373	5.67627	5.98144	5.24902	-0.0305176	-0.0610352	-0.0305176	0.0305176	-0.0610352	30.5176	0.0305176	0	0.0305176	0	-0.0305176
41.1	4.15039	7.38525	6.83594	6.71387	6.40869	6.89697	6.28662	5.7373	5.7373	6.04248	5.31006	-0.0305176	0	-0.0305176	-0.0305176	-0.0610352	0	0	0.0305176	0.0610352	0.0305176	0.0610352
41.2	4.21143	7.32422	6.7749	6.83594	6.46973	6.95801	6.34766	5.67627	5.67627	6.04248	5.37109	0	-0.0610352	-0.0305176	0	-0.0915527	0	-0.0305176	0	-0.0305176	0	0
41.3	4.21143	7.26318	6.7749	6.95801	6.46973	7.01904	6.46973	5.5542	5.67627	6.04248	5.43213	0	-0.0305176	-0.0305176	0.0305176	0.0610352	-30.5176	-0.0610352	-0.0305176	-0.0305176	-0.0305176	-0.0305176
41.4	4.21143	7.26318	6.7749	7.01904	6.53076	7.08008	6.5918	5.49316	5.7373	6.04248	5.43213	-0.0610352	-0.0610352	-0.0610352	0.0305176	0	-30.5176	-0.12207	-0.0915527	-0.0305176	-0.0610352	-0.0305176
41.5	4.21143	7.20215	6.7749	7.01904	6.53076	7.14111	6.5918	5.37109	5.7373	6.04248	5.37109	-0.0610352	-0.0915527	-0.0610352	0.0305176	-0.0610352	-61.0352	-0.0305176	-0.0305176	0.0610352	-0.0610352	0
41.6	4.21143	7.20215	6.7749	6.95801	6.53076	7.14111	6.65283	5.43213	5.67627	6.16455	5.31006	-0.0305176	-0.0610352	-0.0305176	0	-0.0610352	30.5176	0	-0.0305176	0.0610352	0	0
41.7	4.21143	7.20215	6.83594	6.89697	6.53076	7.08008	6.5918	5.5542	5.61523	6.16455	5.31006	0	-0.0915527	-0.0305176	0	-0.0610352	0	0	0.0610352	0.0305176	0	0.0305176
41.8	4.21143	7.20215	6.7749	6.83594	6.40869	7.01904	6.5918	5.61523	5.5542	6.16455	5.24902	-0.0305176	-0.0305176	-0.0305176	0.0305176	-0.12207	-30.5176	-0.0610352	0.0305176	-0.0305176	0	0
41.9	4.27246	7.20215	6.71387	6.71387	6.34766	7.01904	6.5918	5.67627	5.5542	6.10352	5.24902	-0.0305176	-0.0610352	0	0	0	-30.5176	-0.0610352	-0.0610352	0	-0.0610352	0
42	4.27246	7.26318	6.65283	6.65283	6.28662	7.08008	6.5918	5.7373	5.61523	5.98144	5.24902	-0.0915527	-0.0305176	0	0	0	0	-0.0610352	-0.0610352	-0.0305176	0	-0.0610352
42.1	4.27246	7.26318	6.65283	6.65283	6.22559	7.01904	6.46973	5.7373	5.67627	5.92041	5.31006	-0.0610352	-0.0610352	0.0305176	0	-0.0305176	0	0	-0.0610352	0.0305176	-0.0305176	-0.0305176
42.2	4.27246	7.20215	6.65283	6.65283	6.28662	7.01904	6.34766	5.7373	5.7373	5.92041	5.37109	-0.0305176	-0.0610352	0.0610352	0.0305176	-0.0610352	91.5527	0	0	0.0305176	0	-0.0305176
42.3	4.27246	7.14111	6.65283	6.65283	6.34766	6.89697	6.22559	5.67627	5.7373	5.85937	5.43213	-0.0305176	0	-0.0305176	0	-0.0305176	-30.5176	-0.0610352	-0.0305176	0.0305176	-0.0305176	0
42.4	4.27246	7.08008	6.65283	6.65283	6.46973	6.83594	6.16455	5.67627	5.7373	5.85937	5.43213	-0.0305176	0.0305176	0	0.0305176	0	-30.5176	-0.0610352	-0.0305176	0	-0.0305176	-0.0305176
42.5	4.21143	7.08008	6.71387	6.65283	6.53076	6.7749	6.22559	5.61523	5.7373	5.85937	5.37109	-0.0915527	-0.0305176	-0.0305176	0.0305176	0	0	-0.0305176	0.0305176	0	-0.0610352	-0.0305176
42.6	4.21143	7.14111	6.71387	6.71387	6.53076	6.71387	6.22559	5.67627	5.67627	5.92041	5.37109	-0.0305176	0	-0.0305176	0.0305176	-0.0305176	-30.5176	0	-0.0305176	0.0305176	-0.0305176	0
42.7	4.21143	7.14111	6.7749	6.7749	6.53076	6.7749	6.22559	5.61523	5.61523	5.98144	5.37109	0	-0.0305176	0	0.0305176	-0.0915527	-30.5176	-0.0305176	0	0.0305176	0	0.0305176
42.8	4.15039	7.20215	6.83594	6.83594	6.46973	6.89697	6.22559	5.5542	5.61523	6.04248	5.37109	0.0305176	-0.0915527	0.0915527	0	-0.0610352	30.5176	0	0	0.0305176	0	0.0915527
42.9	4.21143	7.14111	6.83594	6.7749	6.40869	6.95801	6.22559	5.5542	5.61523	6.10352	5.31006	-0.0305176	-0.0305176	0	0.0305176	-0.0305176	-30.5176	-0.0305176	-0.0610352	-0.0305176	0	0.0305176
43	4.27246	7.14111	6.83594	6.71387	6.40869	7.01904	6.28662	5.5542	5.61523	6.10352	5.37109	-0.0915527	-0.0610352	-0.0610352	0	0.0610352	-30.5176	-0.0915527	-0.0915527	-0.0305176	-0.0610352	0
43.1	4.39453	7.14111	6.7749	6.65283	6.34766	7.01904	6.28662	5.61523	5.61523	6.10352	5.43213	-0.0305176	-0.0610352	-0.0305176	0.0610352	0.0305176	-30.5176	-0.0305176	-0.0610352	-0.0305176	-0.0610352	-0.0610352
43.2	4.45557	7.14111	6.83594	6.65283	6.40869	7.01904	6.28662	5.67627	5.61523	6.16455	5.49316	-0.0305176	-0.0305176	-0.0305176	0	-0.0305176	-30.5176	0	-0.0305176	0	-0.0610352	-0.0305176
43.3	4.39453	7.20215	6.83594	6.65283	6.40869	7.08008	6.22559	5.67627	5.61523	6.22559	5.49316	-0.0305176	0	0.0305176	0	-0.0610352	30.5176	0	0	0.12207	0	0.0305176
43.4	4.3335	7.14111	6.83594	6.65283	6.46973	7.14111	6.16455	5.7373	5.61523	6.22559	5.43213	-0.0305176	-0.0610352	-0.0915527	0	-0.0610352	-30.5176	0	0	0.0305176	0	0.0610352
43.5	4.27246	7.20215	6.7749	6.65283	6.53076	7.20215	6.16455	5.67627	5.67627	6.16455	5.37109	-0.0305176	-0.0610352	0	-0.0305176	-0.0610352	-61.0352	-0.0305176	0	0	-0.0305176	0
43.6	4.27246	7.20215	6.71387	6.5918	6.46973	7.20215	6.16455	5.67627	5.7373	6.10352	5.31006	-0.0305176	0	0	0	0	-30.5176	-0.0915527	-0.0610352	-0.0305176	-0.0305176	0
43.7	4.27246	7.20215	6.71387	6.5918	6.34766	7.14111	6.16455	5.61523	5.79834	6.10352	5.24902	-0.0610352	-0.0305176	0	-0.0305176	0	-30.5176	-0.0915527	-0.0915527	0	0.0305176	-0.0305176
43.8	4.27246	7.20215	6.65283	6.5918	6.22559	7.08008	6.22559	5.5542	5.85937	6.04248	5.24902	-0.0305176	-0.0305176	-0.0610352	0	-0.0305176	0	-0.0305176	-0.0610352	0.0305176	-0.0305176	0
43.9	4.21143	7.20215	6.65283	6.53076	6.16455	7.08008	6.28662	5.49316	5.92041	5.98144	5.24902	0	-0.0305176	-0.0610352	-0.0305176	0.0305176	0	0.0305176	0.0305176	0.0305176	-0.0305176	-0.0305176
44	4.21143	7.20215	6.65283	6.5918	6.16455	7.01904	6.34766	5.43213	5.85937	5.98144	5.31006	0	0.0305176	-0.0305176	-0.0305176	-0.0305176	0	-0.0305176	0.0305176	0.0305176	-0.0305176	0
44.1	4.21143	7.20215	6.65283	6.5918	6.22559	7.01904	6.34766	5.43213	5.79834	5.98144	5.31006	-0.0305176	0	0	0	-0.0305176	30.5176	-0.0305176	-0.0305176	-0.0305176	-0.0305176	-0.0610352
44.2	4.27246	7.20215	6.65283	6.65283	6.28662	7.01904	6.34766	5.43213	5.7373	5.98144	5.24902	0	-0.0305176	0.0305176	0	-0.0305176	-30.5176	-0.0305176	-0.0305176	-0.0305176	-0.0305176	0
44.3	4.3335	7.32422	6.5918	6.65283	6.34766	7.08008	6.28662	5.43213	5.7373	5.98144	5.31006	-0.0305176	0	0.0305176	0	0	-61.0352	-0.0305176	-0.0305176	0	-0.0305176	0.0305176
44.4	4.3335	7.38525	6.53076	6.71387	6.40869	7.14111	6.22559	5.43213	5.7373	6.04248	5.37109	0	0	0	0	0	30.5176	-0.0610352	0	0.0305176	-0.0305176	0
44.5	4.21143	7.44629	6.53076	6.71387	6.40869	7.14111	6.16455	5.31006	5.67627	6.04248	5.43213	0	-0.0610352	-0.0305176	-0.0305176	-0.0610352	0	-0.0305176	-0.0610352	0.0610352	0.0305176	-0.0305176
44.6	4.08936	7.38525	6.53076	6.71387	6.40869	7.01904	6.16455	5.31006	5.67627	5.98144	5.43213	-0.0305176	0	0.0305176	-0.0305176	-0.0305176	30.5176	0	0	0.0305176	0.0305176	-0.0305176
44.7	4.02832	7.32422	6.53076	6.7749	6.46973	6.95801	6.16455	5.31006	5.61523	5.98144	5.37109	-0.0610352	-0.0305176	-0.0305176	-0.0305176	0	0	-0.0305176	-0.0305176	-0.0305176	-0.0610352	-0.0610352
44.8	4.08936	7.38525	6.53076	6.7749	6.53076	6.89697	6.22559	5.31006	5.5542	6.04248	5.31006	0	0	-0.0305176	-0.0305176	0	30.5176	-0.0610352	-0.0305176	0	-0.0305176	-0.0305176
44.9	4.21143	7.38525	6.65283	6.71387	6.53076	6.89697	6.28662	5.31006	5.5542	6.10352	5.31006	0	0	-0.0305176	-0.0610352	0	0	0	-0.0610352	0.0305176	0	-0.0610352
45	4.27246	7.38525	6.71387	6.71387	6.40869	6.83594	6.40869	5.31006	5.61523	6.10352	5.37109	0	-0.0305176	-0.0305176	0.0305176	-0.0305176	30.5176	-0.0305176	0	0.0610352	0.0610352	0
45.1	4.3335	7.38525	6.7749	6.7749	6.34766	6.71387	6.40869	5.31006	5.67627	6.10352	5.37109	-0.0305176	0.0305176	0.0610352	0.0305176	-0.0305176	0	-0.0305176	0.0305176	-0.0305176	0	0.0305176
45.2	4.27246	7.32422	6.7749	6.83594	6.34766	6.65283	6.28662	5.31006	5.67627	6.04248	5.37109	-0.0305176	-0.0305176	0	0	-0.0610352	0	0.0305176	-0.0305176	-0.0305176	0.0610352	-0.0305176
45.3	4.21143	7.32422	6.71387	6.83594	6.34766	6.71387	6.16455	5.24902	5.67627	6.04248	5.24902	-0.0305176	-0.0305176	0.0305176	-0.0305176	-0.0610352	-30.5176	-0.0305176	-0.0305176	0	0	-0.0305176
45.4	4.15039	7.26318	6.65283	6.89697	6.28662	6.7749	6.16455	5.12695	5.67627	5.98144	5.24902	-0.0610352	0	0	-0.0610352	0	30.5176	-0.0305176	-0.0305176	0	0	-0.0305176
45.5	4.15039	7.32422	6.71387	6.95801	6.16455	6.83594	6.22559	5.06592	5.61523	5.92041	5.24902	-0.0610352	-0.0610352	0.0305176	-0.0305176	0	-30.5176	0.0305176	-0.0610352	-0.0305176	-0.0305176	-0.0305176
45.6	4.15039	7.38525	6.7749	6.95801	6.10352	6.7749	6.34766	5.12695	5.61523	5.79834	5.31006	-0.0305176	-0.0305176	-0.0305176	0	0	0	-0.0305176	-0.0305176	0	-0.0305176	-0.0305176
45.7	4.21143	7.44629	6.83594	6.95801	6.04248	6.7749	6.40869	5.24902	5.67627	5.7373	5.31006	0	0	-0.0305176	0	-0.0305176	0	0	-0.0305176	0	-0.0305176	0
45.8	4.27246	7.44629	6.89697	6.95801	6.04248	6.7749	6.40869	5.31006	5.79834	5.79834	5.24902	-0.0305176	0	-0.0610352	0.0305176	-0.0610352	0	0	0	-0.0305176	0	0.0305176
45.9	4.3335	7.50732	6.89697	6.95801	6.10352	6.7749	6.34766	5.31006	5.85937	5.85937	5.31006	0.0305176	0	0.0305176	0.0305176	0	-30.5176	0.0610352	0	-0.0305176	-0.0305176	-0.0305176
46	4.3335	7.62939	6.89697	6.95801	6.16455	6.7749	6.34766	5.31006	5.85937	5.92041	5.37109	-0.0305176	-0.0610352	0.0610352	0	0	0	0	-0.0305176	-0.0610352	-0.0610352	0.0305176
46.1	4.39453	7.69043	6.83594	6.95801	6.22559	6.7749	6.34766	5.24902	5.85937	5.98144	5.37109	0	-0.0915527	-0.0305176	0.0305176	-0.0305176	0	-0.0305176	0	0	-0.0305176	-0.0305176
46.2	4.45557	7.69043	6.7749	6.95801	6.22559	6.83594	6.34766	5.24902	5.85937	5.98144	5.37109	-0.0305176	-0.0305176	0	0	-0.0305176	0	-0.0610352	0	-0.0305176	0	0
46.3	4.5166	7.75146	6.7749	6.89697	6.22559	6.89697	6.40869	5.24902	5.85937	5.98144	5.31006	-0.0305176	-0.0305176	-0.0915527	0	-0.0305176	30.5176	-0.0610352	-0.0305176	-0.0305176	-0.0305176	0
46.4	4.5166	7.69043	6.7749	6.83594	6.22559	6.89697	6.40869	5.24902	5.85937	5.98144	5.24902	-0.0610352	0	-0.0305176	-0.0610352	0	30.5176	-0.0305176	0.0305176	0	-0.0305176	-0.0305176
46.5	4.5166	7.69043	6.71387	6.83594	6.34766	6.89697	6.40869	5.31006	5.92041	5.98144	5.18799	-0.0305176	-0.0305176	-0.0915527	-0.0305176	-0.0305176	0	0	-0.0305176	-0.0305176	-0.0610352	-0.0610352
46.6	4.39453	7.69043	6.71387	6.83594	6.46973	6.83594	6.34766	5.31006	5.92041	6.04248	5.18799	0	-0.0305176	0	0.0305176	-0.0305176	0	-0.0305176	0	0	-0.0610352	0.0305176
46.7	4.27246	7.62939	6.7749	6.89697	6.46973	6.71387	6.40869	5.31006	5.92041	6.04248	5.18799	0	-0.0305176	-0.0610352	0	0	-30.5176	0	0.0305176	-0.0305176	0	0.0305176
46.8	4.21143	7.56836	6.7749	6.89697	6.53076	6.5918	6.34766	5.31006	5.92041	6.04248	5.18799	0	0.0305176	0	-0.0305176	-0.0305176	-30.5176	-0.0305176	-0.0305176	-0.0305176	0	0.0305176
46.9	4.15039	7.44629	6.83594	6.89697	6.46973	6.53076	6.40869	5.31006	5.85937	6.10352	5.24902	-0.0305176	-0.0305176	0.0305176	0	-0.0305176	-61.0352	-0.0610352	0	-0.0305176	-0.0305176	0
47	4.08936	7.38525	6.83594	6.83594	6.40869	6.5918	6.40869	5.24902	5.7373	6.16455	5.24902	0.0305176	0	0	-0.0610352	0.0610352	-30.5176	-0.0305176	-0.0305176	-0.0305176	-0.0305176	-0.0305176
47.1	4.02832	7.32422	6.83594	6.83594	6.34766	6.5918	6.46973	5.24902	5.7373	6.10352	5.31006	-0.0610352	-0.0305176	0	-0.0915527	-0.0305176	0	-0.0610352	0	0.0305176	-0.0610352	-0.0305176
47.2	4.02832	7.32422	6.83594	6.83594	6.28662	6.5918	6.46973	5.18799	5.67627	6.04248	5.31006	0	0	-0.0610352	-0.0610352	0.0610352	0	-0.0610352	0	0	-0.0305176	-0.0610352
47.3	4.02832	7.32422	6.83594	6.7749	6.34766	6.65283	6.53076	5.18799	5.61523	5.98144	5.31006	0	0	-0.0305176	0.0305176	0	0	0.0305176	-0.0305176	0	-0.0610352	-0.0305176
47.4	4.08936	7.38525	6.83594	6.83594	6.40869	6.65283	6.53076	5.12695	5.67627	5.98144	5.24902	-0.0610352	0	-0.0305176	0	0	0	0	0	-0.0305176	-0.0305176	0
47.5	4.15039	7.38525	6.7749	6.83594	6.46973	6.71387	6.46973	5.06592	5.7373	6.04248	5.12695	0.0305176	0	0	0	0	-30.5176	0.0610352	0.0610352	-0.0610352	0.0305176	-0.0305176
47.6	4.15039	7.38525	6.7749	6.89697	6.46973	6.71387	6.40869	5.00488	5.85937	6.10352	5.12695	-0.0305176	0	-0.0305176	-0.0305176	0	-30.5176	0.0305176	0.0305176	-0.0305176	0.0305176	-0.0305176
47.7	4.15039	7.32422	6.71387	6.95801	6.46973	6.7749	6.40869	5.00488	5.92041	6.10352	5.12695	0.0305176	-0.0305176	0	-0.0305176	-0.0305176	-30.5176	0.0305176	0.0610352	0	0	0
47.8	4.15039	7.26318	6.71387	6.95801	6.46973	6.83594	6.34766	5.06592	5.98144	6.04248	5.24902	-0.0305176	-0.0305176	0.0305176	-0.0610352	0.0610352	-61.0352	-0.0305176	0	-0.0305176	0	-0.0305176
47.9	4.15039	7.26318	6.7749	7.01904	6.40869	6.83594	6.34766	5.06592	5.98144	6.04248	5.31006	-0.0305176	0	-0.0305176	-0.0610352	0.0305176	-30.5176	-0.0305176	-0.0305176	-0.0305176	-0.0305176	-0.0610352
48	4.21143	7.26318	6.7749	6.95801	6.40869	6.83594	6.28662	5.06592	6.04248	6.16455	5.31006	-0.0305176	0	-0.0305176	-0.0610352	0.0305176	0	0.0610352	-0.0305176	0	-0.0305176	-0.0305176
48.1	4.27246	7.32422	6.89697	6.95801	6.40869	6.83594	6.28662	5.00488	6.04248	6.22559	5.24902	-0.0305176	0.0305176	0	-0.0610352	0	-61.0352	0.0305176	0	-0.0305176	-0.0305176	-0.0305176
48.2	4.27246	7.38525	6.95801	6.89697	6.46973	6.83594	6.34766	5.00488	6.04248	6.22559	5.18799	0	0.0305176	-0.0305176	-0.0305176	-0.0305176	30.5176	0.0305176	0	-0.0610352	0	0.0305176
48.3	4.3335	7.32422	7.01904	6.89697	6.53076	6.7749	6.34766	5.00488	6.04248	6.22559	5.12695	0.0305176	0	0	-0.0305176	-0.0305176	-61.0352	0.0305176	0.0305176	-0.0305176	-0.0305176	0
48.4	4.3335	7.32422	7.01904	6.83594	6.46973	6.7749	6.34766	5.00488	5.92041	6.16455	5.12695	0	0.0305176	-0.0305176	-0.0305176	0.0305176	-30.5176	-0.0305176	-0.0305176	-0.0915527	0	0
48.5	4.3335	7.32422	6.95801	6.7749	6.46973	6.7749	6.34766	5.06592	5.85937	6.10352	5.12695	0	-0.0305176	-0.0305176	0	-0.0305176	-30.5176	0	0	0	-0.0305176	-0.0305176
48.6	4.27246	7.38525	6.83594	6.71387	6.53076	6.83594	6.34766	5.12695	5.85937	6.04248	5.12695	-0.0305176	0.0305176	-0.0610352	0	-0.0305176	-30.5176	0.0305176	0.0305176	-0.0305176	-0.0305176	-0.0305176
48.7	4.27246	7.44629	6.71387	6.65283	6.53076	6.83594	6.28662	5.18799	5.85937	6.04248	5.12695	-0.0305176	-0.0610352	0.0610352	-0.0915527	-0.0305176	61.0352	0.0305176	0	0	-0.0305176	-0.0305176
48.8	4.21143	7.44629	6.71387	6.65283	6.5918	6.7749	6.22559	5.24902	5.85937	6.04248	5.18799	-0.0610352	0	-0.0305176	-0.0610352	0	30.5176	-0.0305176	0	-0.0305176	-0.0305176	-0.0610352
48.9	4.21143	7.44629	6.65283	6.7749	6.5918	6.71387	6.22559	5.24902	5.85937	5.98144	5.18799	-0.0305176	0	-0.0305176	-0.0610352	-0.0305176	30.5176	-0.0305176	-0.0305176	-0.0610352	-0.0915527	-0.0610352
49	4.15039	7.38525	6.65283	6.7749	6.5918	6.7749	6.22559	5.31006	5.85937	5.98144	5.18799	-0.0305176	0.0305176	-0.0305176	-0.0305176	0.0305176	-30.5176	0	-0.0305176	-0.0610352	-0.0610352	-0.0305176
49.1	4.15039	7.32422	6.71387	6.7749	6.53076	6.7749	6.16455	5.24902	5.79834	6.04248	5.18799	0	0.0305176	0.0305176	0	0	0	0.0305176	0	0	-0.0610352	0
49.2	4.15039	7.32422	6.7749	6.7749	6.53076	6.7749	6.16455	5.24902	5.79834	6.10352	5.18799	0	0	0	-0.0610352	-0.0305176	30.5176	0.0610352	0.0610352	0	-0.0305176	-0.0305176
49.3	4.15039	7.38525	6.7749	6.7749	6.5918	6.7749	6.22559	5.18799	5.79834	6.10352	5.24902	0.0305176	-0.0305176	0	-0.0305176	-0.0305176	30.5176	0	0.0305176	0	0	0
49.4	4.15039	7.38525	6.7749	6.7749	6.65283	6.71387	6.22559	5.18799	5.79834	6.16455	5.18799	0	0	0.0305176	0.0305176	0	-30.5176	-0.0305176	-0.0305176	0	-0.0610352	-0.0305176
49.5	4.08936	7.32422	6.71387	6.7749	6.71387	6.7749	6.28662	5.24902	5.85937	6.16455	5.18799	0.0305176	0.0610352	-0.0305176	-0.0305176	0	-61.0352	0	-0.0305176	-0.0305176	-0.0305176	-0.0915527
49.6	4.15039	7.32422	6.7749	6.83594	6.71387	6.7749	6.28662	5.31006	5.79834	6.16455	5.18799	-0.0305176	0.0305176	-0.0610352	-0.0610352	0.0610352	30.5176	-0.0610352	-0.0610352	0	-0.0915527	-0.0915527
49.7	4.21143	7.32422	6.7749	6.83594	6.71387	6.83594	6.28662	5.31006	5.85937	6.22559	5.18799	0	0.0305176	-0.0305176	-0.0305176	0	0	0.0305176	0	-0.0305176	-0.0305176	-0.0305176
49.8	4.27246	7.32422	6.83594	6.89697	6.71387	6.83594	6.28662	5.31006	5.85937	6.28662	5.12695	0.0915527	0	0.0305176	-0.0610352	-0.0610352	30.5176	0	0.0305176	0	0	0.0305176
49.9	4.39453	7.32422	6.89697	6.95801	6.65283	6.89697	6.28662	5.31006	5.92041	6.34766	5.12695	-0.0305176	0.0305176	-0.0305176	-0.0610352	0	0	0	0.0610352	0	0	0
50	4.45557	7.38525	6.89697	6.95801	6.53076	6.83594	6.28662	5.24902	5.98144	6.34766	5.12695	0.0610352	0.0305176	-0.0305176	-0.0305176	-0.0305176	-61.0352	0.0305176	0.0305176	-0.0915527	0.0610352	-0.0610352
50.1	4.5166	7.38525	6.95801	6.89697	6.46973	6.83594	6.28662	5.18799	5.98144	6.34766	5.12695	0	0.0305176	0	-0.0610352	0.0305176	-61.0352	-0.0610352	0	-0.0915527	-0.0305176	-0.0610352
50.2	4.45557	7.38525	6.95801	6.83594	6.46973	6.7749	6.22559	5.18799	5.92041	6.34766	5.18799	-0.0305176	0	0.0305176	-0.0610352	0.0610352	0	0.0305176	-0.0305176	-0.0610352	0.0305176	-0.0305176
50.3	4.39453	7.38525	6.89697	6.83594	6.53076	6.71387	6.16455	5.12695	5.92041	6.34766	5.24902	0.0305176	0	0	-0.0610352	0.0305176	61.0352	0.0915527	0	-0.0305176	0.0305176	0
50.4	4.39453	7.38525	6.89697	6.89697	6.53076	6.65283	6.16455	5.12695	5.92041	6.34766	5.24902	-0.0305176	-0.0305176	0	-0.0610352	-0.0305176	61.0352	0	0.0305176	0	0.0305176	0
50.5	4.3335	7.32422	6.89697	6.89697	6.5918	6.65283	6.10352	5.18799	5.92041	6.34766	5.31006	-0.0305176	0.0305176	-0.0610352	0	-0.0305176	0	0	0.0305176	-0.0305176	-0.0305176	-0.0305176
50.6	4.27246	7.32422	6.95801	6.89697	6.5918	6.71387	6.10352	5.24902	5.92041	6.28662	5.31006	-0.0610352	0.0305176	-0.0610352	0	0.0305176	-61.0352	-0.0610352	0	-0.0305176	-0.0305176	-0.0305176
50.7	4.21143	7.32422	6.89697	6.83594	6.53076	6.7749	6.16455	5.31006	5.92041	6.28662	5.24902	-0.0610352	0	-0.0305176	0	0.0305176	-30.5176	0	0	-0.0610352	-0.0610352	-0.0610352
50.8	4.15039	7.26318	6.95801	6.7749	6.46973	6.83594	6.16455	5.31006	5.85937	6.16455	5.18799	0.0305176	0	0.0305176	0	0	0	0.0305176	0	-0.0305176	0	-0.0305176
50.9	4.08936	7.26318	6.95801	6.71387	6.40869	6.83594	6.16455	5.24902	5.92041	6.10352	5.12695	0.0305176	0	0.0305176	-0.0305176	-0.0305176	0	0.0305176	0.0305176	-0.0305176	0.0305176	0.0610352
51	4.02832	7.20215	6.89697	6.71387	6.34766	6.7749	6.22559	5.24902	5.92041	6.04248	5.12695	0.0305176	0.0305176	0	-0.0305176	-0.0305176	0	0	0.0305176	-0.0915527	-0.0305176	-0.0305176
51.1	3.96728	7.20215	6.89697	6.71387	6.34766	6.7749	6.22559	5.31006	5.98144	5.98144	5.12695	0	0.0305176	-0.0305176	-0.0305176	0	-30.5176	0	0	-0.0610352	-0.0305176	-0.0610352
51.2	3.96728	7.26318	6.95801	6.65283	6.40869	6.7749	6.28662	5.37109	6.04248	5.98144	5.18799	-0.0610352	0	-0.0305176	-0.0305176	0.0610352	-91.5527	-0.0610352	-0.0610352	-0.0915527	-0.0610352	-0.0610352
51.3	4.08936	7.26318	6.95801	6.65283	6.46973	6.71387	6.34766	5.43213	6.10352	6.04248	5.18799	0	0	-0.0610352	-0.0610352	0.0915527	-30.5176	-0.0305176	-0.0305176	-0.0610352	-0.0610352	-0.0915527
51.4	4.21143	7.26318	6.89697	6.5918	6.5918	6.71387	6.34766	5.43213	6.04248	6.10352	5.12695	0	0	0	-0.0610352	0	0	0.0305176	-0.0305176	0.0305176	-0.0305176	-0.0610352
51.5	4.21143	7.26318	6.89697	6.65283	6.65283	6.65283	6.40869	5.43213	5.98144	6.16455	5.12695	0	0	0.0305176	-0.0305176	-0.12207	0	0.0610352	0.0305176	0.0305176	-0.0305176	0.0305176
51.6	4.21143	7.26318	6.89697	6.71387	6.71387	6.71387	6.40869	5.43213	5.85937	6.28662	5.12695	0	0	0	0	-0.0305176	-30.5176	0	0.0610352	-0.0305176	0	0.0305176
51.7	4.21143	7.26318	6.89697	6.7749	6.7749	6.7749	6.40869	5.49316	5.79834	6.40869	5.18799	0	0	-0.0305176	0	0	-91.5527	-0.0305176	0.0305176	-0.0610352	-0.0305176	0
51.8	4.21143	7.32422	6.95801	6.7749	6.7749	6.83594	6.40869	5.43213	5.79834	6.40869	5.18799	0.0610352	0	-0.0305176	0.0305176	0.0305176	-30.5176	-0.0305176	0.0305176	-0.0610352	-0.0305176	-0.0610352
51.9	4.21143	7.32422	7.01904	6.83594	6.71387	6.89697	6.34766	5.37109	5.79834	6.46973	5.18799	-0.0305176	-0.0305176	-0.0305176	-0.0610352	0.0305176	-30.5176	0.0610352	0	-0.0305176	0.0305176	-0.0305176
52	4.15039	7.32422	7.01904	6.89697	6.65283	6.83594	6.34766	5.31006	5.7373	6.46973	5.12695	-0.0610352	0	-0.0610352	-0.0610352	0	30.5176	0.0305176	0.0305176	0.0305176	0	-0.0610352
52.1	4.15039	7.32422	7.01904	6.89697	6.65283	6.83594	6.34766	5.18799	5.7373	6.46973	5.06592	-0.0610352	0	-0.0305176	-0.0610352	0	-30.5176	0	0.0305176	-0.0305176	0	-0.0305176
52.2	4.08936	7.32422	7.01904	6.89697	6.65283	6.7749	6.34766	5.06592	5.7373	6.46973	5.00488	-0.0610352	0.0305176	0	-0.0305176	0.0305176	0	0	0	0	-0.0305176	-0.0305176
52.3	4.02832	7.32422	7.01904	6.95801	6.65283	6.7749	6.40869	5.00488	5.7373	6.40869	4.94385	-0.0305176	0	0	0	-0.0305176	61.0352	-0.0305176	0	-0.0305176	-0.0610352	-0.0305176
52.4	4.02832	7.32422	7.01904	6.95801	6.65283	6.71387	6.40869	5.06592	5.7373	6.34766	4.94385	-0.0305176	0	0	0	-0.0305176	0	0.0305176	0	-0.0610352	-0.0305176	-0.0305176
52.5	4.02832	7.38525	7.08008	7.01904	6.5918	6.71387	6.34766	5.12695	5.7373	6.34766	4.94385	0	0.0610352	-0.0305176	0	0	-30.5176	-0.0305176	-0.0305176	0	-0.0305176	-0.0915527
52.6	4.02832	7.38525	7.08008	7.01904	6.53076	6.65283	6.28662	5.24902	5.79834	6.34766	4.94385	-0.0610352	0	-0.0305176	-0.0305176	-0.0610352	0	0.0915527	0.0305176	0	-0.0305176	-0.0610352
52.7	4.15039	7.44629	7.08008	7.08008	6.40869	6.65283	6.22559	5.43213	5.85937	6.34766	4.94385	-0.0305176	0.0305176	-0.0305176	-0.0915527	0	0	0.0610352	0	0	0.0305176	0
52.8	4.21143	7.44629	7.08008	7.14111	6.40869	6.5918	6.16455	5.43213	5.79834	6.40869	5.00488	-0.0305176	0	-0.0305176	-0.0305176	0	-61.0352	-0.0305176	0	0.0305176	0	0
52.9	4.21143	7.38525	7.14111	7.14111	6.46973	6.65283	6.16455	5.43213	5.7373	6.40869	5.06592	-0.0305176	0	-0.0305176	0	0.0305176	30.5176	-0.0305176	-0.0305176	0	-0.0915527	-0.0610352
53	4.15039	7.26318	7.08008	7.20215	6.53076	6.5918	6.16455	5.43213	5.67627	6.40869	5.12695	0	0	0.0305176	-0.0305176	-0.0305176	30.5176	0	0	-0.0305176	-0.0610352	-0.0610352
53.1	4.15039	7.26318	6.95801	7.26318	6.65283	6.53076	6.16455	5.43213	5.67627	6.34766	5.18799	-0.0610352	0.0305176	-0.0305176	0	-0.0305176	-30.5176	0.0305176	0	0	-0.0305176	-0.0305176
53.2	4.15039	7.26318	6.89697	7.20215	6.71387	6.53076	6.22559	5.43213	5.67627	6.34766	5.18799	-0.0610352	0.0305176	0	-0.0305176	-0.0610352	0	0.0305176	0.0305176	-0.0305176	0.0305176	-0.0610352
53.3	4.15039	7.26318	6.83594	7.14111	6.65283	6.5918	6.34766	5.43213	5.7373	6.22559	5.12695	0	0	-0.0305176	-0.0305176	-0.0305176	-30.5176	0.0610352	0.0305176	-0.0305176	0	0
53.4	4.15039	7.32422	6.83594	7.08008	6.5918	6.5918	6.46973	5.43213	5.7373	6.22559	5.12695	-0.0305176	0	0.0305176	-0.0305176	-0.0305176	-30.5176	-0.0305176	0	-0.0610352	0	-0.0610352
53.5	4.15039	7.26318	6.89697	7.08008	6.53076	6.53076	6.53076	5.49316	5.79834	6.22559	5.12695	0	-0.0305176	0.0305176	-0.0305176	0.0305176	0	-0.0305176	-0.0305176	0	0	-0.0305176
53.6	4.15039	7.26318	6.83594	7.08008	6.53076	6.46973	6.40869	5.49316	5.85937	6.22559	5.06592	-0.0305176	-0.0305176	0	-0.0305176	0	0	-0.0305176	-0.0610352	0	-0.0305176	-0.0305176
53.7	4.15039	7.32422	6.83594	7.08008	6.5918	6.53076	6.28662	5.43213	5.92041	6.28662	5.12695	-0.0610352	-0.0305176	-0.0305176	0	0	-30.5176	-0.0610352	-0.0305176	-0.0305176	-0.0610352	-0.0610352
53.8	4.15039	7.32422	6.89697	7.01904	6.5918	6.5918	6.16455	5.37109	5.92041	6.34766	5.12695	-0.0305176	0	-0.0305176	-0.0915527	-0.0915527	30.5176	0	-0.0305176	0.0610352	0	-0.0305176
53.9	4.15039	7.26318	6.95801	7.01904	6.65283	6.65283	6.10352	5.31006	5.79834	6.34766	5.24902	-0.0305176	0	0	0	-0.0610352	0	0.0610352	-0.0305176	-0.0305176	-0.0610352	-0.0305176
54	4.15039	7.26318	6.95801	7.01904	6.5918	6.65283	6.16455	5.37109	5.7373	6.28662	5.18799	0	-0.0305176	0.0610352	0.0305176	-0.0610352	-30.5176	0	-0.0610352	0	-0.0610352	-0.0610352
54.1	4.08936	7.20215	6.89697	7.01904	6.53076	6.71387	6.22559	5.37109	5.7373	6.22559	5.12695	0.0610352	0	0.0305176	0.0610352	0	0	0.0305176	0	-0.0305176	0.0305176	0.0305176
54.2	4.02832	7.14111	6.83594	7.08008	6.46973	6.71387	6.28662	5.49316	5.7373	6.16455	5.00488	0	-0.0305176	0	0.0305176	0.0610352	30.5176	0	0	-0.0305176	-0.0305176	-0.0610352
54.3	4.02832	7.08008	6.7749	7.08008	6.40869	6.71387	6.34766	5.5542	5.79834	6.16455	5.00488	-0.0305176	-0.0610352	-0.0610352	-0.0305176	0	0	-0.0610352	0	-0.0305176	0	0
54.4	4.08936	7.01904	6.71387	7.08008	6.40869	6.71387	6.34766	5.61523	5.85937	6.22559	5.00488	0	0	-0.0610352	0	0.0610352	0	0	-0.0305176	0.0305176	0	0
54.5	4.08936	6.89697	6.65283	7.08008	6.40869	6.71387	6.34766	5.67627	5.85937	6.16455	5.06592	-0.0305176	0	-0.0305176	-0.0610352	0	-61.0352	0	-0.0305176	-0.0610352	-0.0305176	-0.0305176
54.6	4.02832	6.89697	6.65283	7.01904	6.46973	6.65283	6.34766	5.67627	5.85937	6.10352	5.06592	-0.0305176	-0.0305176	-0.0305176	0	0.0305176	30.5176	0	-0.0305176	0	-0.0610352	-0.0305176
54.7	3.96728	6.89697	6.71387	7.01904	6.46973	6.53076	6.28662	5.61523	5.85937	6.10352	5.06592	0.0305176	-0.0305176	0	-0.0305176	-0.0305176	-30.5176	-0.0305176	-0.0305176	0	-0.0305176	0
54.8	3.96728	6.89697	6.7749	7.01904	6.46973	6.46973	6.22559	5.49316	5.79834	6.10352	5.06592	0	-0.0610352	0	0.0305176	0	0	-0.0305176	0.0305176	0	-0.0305176	0.0305176
54.9	3.96728	6.95801	6.89697	7.08008	6.53076	6.46973	6.16455	5.43213	5.79834	6.10352	5.00488	0	-0.0305176	-0.0305176	0	-0.0305176	30.5176	-0.0305176	-0.0305176	-0.0305176	0	0
55	3.96728	6.89697	6.89697	7.08008	6.5918	6.46973	6.10352	5.31006	5.85937	6.10352	4.94385	-0.0305176	0.0305176	-0.0610352	0	0	-61.0352	-0.0610352	0.0305176	-0.0610352	0	0.0305176
55.1	4.02832	6.89697	6.89697	7.01904	6.65283	6.46973	6.04248	5.24902	5.85937	6.16455	4.88281	0.0610352	-0.0610352	-0.0305176	-0.0305176	-0.0305176	-30.5176	-0.0305176	-0.0610352	-0.0610352	-0.0305176	-0.0305176
55.2	4.08936	6.89697	6.83594	6.95801	6.65283	6.40869	6.04248	5.31006	5.92041	6.16455	4.82178	0	-0.0305176	0	-0.0305176	-0.0305176	-30.5176	-0.0305176	0	0	-0.0305176	0
55.3	4.08936	6.89697	6.7749	6.89697	6.5918	6.40869	5.98144	5.37109	5.85937	6.16455	4.76074	0	-0.0610352	0	-0.0305176	-0.0305176	30.5176	-0.0305176	0.0305176	-0.0305176	0	-0.0610352
55.4	4.08936	6.89697	6.71387	6.89697	6.5918	6.40869	5.92041	5.43213	5.79834	6.22559	4.69971	-0.0305176	0	0	-0.0305176	-0.0610352	0	-0.0610352	-0.0305176	0.0305176	-0.0305176	0.0305176
55.5	4.21143	6.89697	6.71387	6.95801	6.53076	6.40869	5.98144	5.43213	5.7373	6.22559	4.63867	-0.0610352	-0.0305176	0	0.0305176	-0.0305176	0	-0.12207	0	-0.0305176	-0.0610352	0.0305176
55.6	4.3335	7.01904	6.71387	7.01904	6.46973	6.40869	6.04248	5.49316	5.67627	6.28662	4.69971	-0.0610352	0.0305176	0	0	-0.0610352	-30.5176	0.0305176	0.0305176	0	-0.0305176	0
55.7	4.45557	7.01904	6.65283	7.01904	6.40869	6.46973	6.10352	5.43213	5.67627	6.22559	4.69971	0	0	0	0.0305176	-0.0305176	-30.5176	-0.0305176	0	-0.0610352	0.0305176	-0.0305176
55.8	4.45557	7.01904	6.65283	7.08008	6.34766	6.46973	6.16455	5.43213	5.67627	6.22559	4.76074	0	-0.0610352	0	0	-0.0610352	-30.5176	0	0	0	0.0305176	0
55.9	4.39453	7.01904	6.65283	7.08008	6.34766	6.40869	6.22559	5.37109	5.67627	6.22559	4.82178	-0.0610352	-0.0305176	0.0610352	0.0305176	0	-30.5176	-0.0610352	-0.0305176	-0.0610352	0.0305176	0
56	4.27246	6.95801	6.71387	7.08008	6.40869	6.34766	6.16455	5.31006	5.7373	6.22559	4.82178	0	-0.0610352	-0.0305176	0	0.0305176	-91.5527	-0.0305176	-0.0610352	-0.0610352	0	0
56.1	4.15039	6.95801	6.71387	7.08008	6.53076	6.34766	6.16455	5.37109	5.7373	6.22559	4.82178	-0.0305176	-0.0610352	0	-0.0305176	0	-91.5527	-0.0610352	-0.0305176	0	0	0
56.2	4.15039	6.89697	6.71387	7.01904	6.65283	6.40869	6.16455	5.37109	5.7373	6.22559	4.82178	-0.0305176	-0.0305176	0	0	0	-61.0352	-0.0305176	-0.0305176	0	-0.0610352	-0.0305176
56.3	4.15039	6.83594	6.71387	6.95801	6.7749	6.46973	6.22559	5.37109	5.7373	6.22559	4.88281	-0.0610352	-0.0610352	0	-0.0305176	-0.0610352	0	0.0305176	-0.0305176	0.0610352	0	0
56.4	4.21143	6.83594	6.7749	6.89697	6.7749	6.46973	6.22559	5.31006	5.7373	6.22559	4.88281	-0.0305176	-0.0305176	0.0305176	0.0305176	-0.0610352	0	-0.0305176	-0.0305176	0.0305176	0	0.0305176
56.5	4.27246	6.7749	6.7749	6.89697	6.7749	6.53076	6.22559	5.24902	5.7373	6.16455	4.94385	-0.0305176	-0.0305176	-0.0305176	0	-0.0610352	-30.5176	-0.0305176	0	0	0	-0.0305176
56.6	4.3335	6.83594	6.7749	6.89697	6.71387	6.5918	6.16455	5.24902	5.67627	6.10352	4.82178	0	0	0.0305176	0.0305176	-0.0305176	-91.5527	-0.0610352	-0.0610352	-0.0305176	0	0
56.7	4.3335	6.7749	6.71387	6.83594	6.65283	6.5918	6.22559	5.31006	5.67627	6.04248	4.76074	0.0610352	-0.0305176	0	-0.0610352	0	-91.5527	0.0305176	-0.0915527	-0.0610352	-0.0305176	0
56.8	4.3335	6.7749	6.71387	6.7749	6.5918	6.65283	6.16455	5.37109	5.7373	5.98144	4.63867	0	-0.0610352	0	-0.0610352	-0.0305176	-30.5176	-0.0305176	-0.0610352	0.0305176	0.0305176	-0.0305176
56.9	4.39453	6.71387	6.65283	6.7749	6.65283	6.5918	6.16455	5.43213	5.7373	5.98144	4.63867	-0.0305176	-0.0610352	-0.0610352	-0.0610352	-0.0610352	0	-0.0305176	-0.0915527	0	-0.0305176	0
57	4.45557	6.7749	6.5918	6.7749	6.65283	6.5918	6.10352	5.49316	5.7373	5.98144	4.69971	-0.0915527	-0.0305176	-0.0305176	0	-0.0610352	-30.5176	-0.0915527	-0.0610352	0	-0.0610352	-0.0305176
57.1	4.45557	6.7749	6.5918	6.83594	6.65283	6.53076	6.04248	5.49316	5.7373	5.98144	4.76074	-0.0305176	-0.0305176	0	0	-0.0305176	-30.5176	-0.0610352	-0.0305176	0	0	0
57.2	4.45557	6.83594	6.65283	6.83594	6.65283	6.40869	5.98144	5.49316	5.67627	5.98144	4.82178	0	0	0	0	-0.0610352	0	0	-0.0305176	-0.0305176	-0.0610352	-0.0305176
57.3	4.39453	6.89697	6.5918	6.83594	6.5918	6.40869	5.98144	5.43213	5.67627	5.98144	4.88281	-0.0610352	-0.0305176	0	-0.0305176	-0.0610352	-61.0352	0	-0.0305176	0.0305176	0	0
57.4	4.39453	6.89697	6.5918	6.89697	6.5918	6.34766	6.04248	5.43213	5.67627	5.98144	4.88281	-0.0305176	0	-0.0305176	0	-0.0915527	0	0	0.0305176	0.0305176	-0.0305176	0.0915527
57.5	4.39453	6.89697	6.5918	6.89697	6.5918	6.34766	6.10352	5.43213	5.67627	5.98144	4.94385	-0.0305176	-0.0915527	-0.0305176	-0.0305176	-0.0915527	0	-0.0610352	0	0	0.0305176	0
57.6	4.45557	6.89697	6.5918	6.83594	6.65283	6.40869	6.16455	5.37109	5.61523	6.04248	4.88281	0.0305176	-0.0610352	-0.0915527	0.0305176	-0.0305176	-30.5176	-0.0915527	-0.0610352	-0.0610352	0.0305176	0
57.7	4.45557	6.89697	6.65283	6.83594	6.65283	6.46973	6.22559	5.31006	5.5542	6.10352	4.88281	0.0305176	-0.0305176	0.0305176	0.0305176	-0.0305176	0	-0.0610352	-0.12207	-0.0305176	-0.0305176	-0.0610352
57.8	4.45557	6.89697	6.71387	6.89697	6.65283	6.46973	6.22559	5.31006	5.49316	6.16455	4.88281	-0.0305176	-0.0915527	-0.0305176	0	-0.0305176	-30.5176	-0.0305176	-0.0610352	0	0	-0.0305176
57.9	4.39453	6.89697	6.71387	6.89697	6.65283	6.46973	6.22559	5.37109	5.43213	6.10352	4.88281	-0.0610352	-0.0305176	-0.0305176	-0.0305176	-0.0305176	0	-0.0305176	-0.0610352	0.0305176	-0.0305176	0
58	-3.23486	0	0.915527	2.50244	3.96728	6.53076	9.21631	10.2539	11.8408	13.7329	13.3667	-100.128	-80.0476	-60.0586	-40.0391	-20.0806	61.0352	19.9585	39.978	60.1196	80.1086	100.128
58.1	-90.271	-72.876	-56.3965	-37.7197	-18.4937	6.5918	33.3862	53.5889	73.0591	91.7358	106.201	-100.159	-80.0781	-60.0586	-40.0085	-20.05	0	19.989	40.0085	60.0281	80.0781	100.159
58.2	-259.644	-210.205	-161.316	-109.009	-57.0068	6.71387	74.0356	129.517	184.082	237.427	285.767	-100.128	-80.0781	-60.0586	-40.0391	-20.0806	-30.5176	19.928	39.9475	60.0586	80.0171	100.067
58.3	-414.49	-333.191	-253.54	-170.288	-88.8061	6.83594	107.056	193.665	280.151	366.211	448.059	-100.098	-80.1697	-60.0586	-40.0696	-19.989	-30.5176	19.989	39.978	59.9976	80.0781	100.098
58.4	-493.164	-393.799	-297.668	-198.669	-102.173	6.83594	120.239	221.985	324.402	427.429	528.015	-100.128	-80.1697	-60.0891	-40.1001	-19.989	30.5176	19.989	39.9475	60.0586	80.0781	100.128
58.5	-498.718	-396.179	-298.035	-197.815	-99.9756	6.7749	116.943	219.116	322.144	426.758	530.334	-100.159	-80.1697	-60.0891	-40.0391	-20.05	0	19.9585	39.9475	60.0891	80.0781	100.098
58.6	-464.172	-367.371	-275.452	-182.007	-90.332	6.65283	106.018	200.806	296.204	393.799	490.967	-100.159	-80.1392	-60.1196	-40.0085	-20.1111	30.5176	19.928	40.0085	60.0586	80.0781	100.159
58.7	-419.678	-331.421	-248.047	-163.33	-79.7729	6.65283	94.2993	180.054	265.869	354.126	442.261	-100.189	-80.0476	-60.0891	-39.978	-20.0806	-30.5176	19.928	39.978	60.0586	80.0476	100.098
58.8	-380.92	-300.476	-224.792	-147.644	-71.167	6.65283	85.022	162.964	240.784	320.618	400.757	-100.128	-80.0476	-59.9976	-39.978	-20.05	-61.0352	19.9585	39.978	60.0586	80.0476	100.067
58.9	-351.868	-277.466	-207.52	-136.047	-65.0024	6.5918	78.3691	150.574	222.534	295.898	370.117	-100.128	-80.0781	-60.0281	-39.978	-20.0195	-61.0352	19.9585	40.0085	60.0281	80.0476	100.128
59	-330.811	-260.864	-194.946	-127.747	-60.6689	6.5918	73.7305	141.724	209.595	278.259	348.022	-100.098	-80.1697	-60.0586	-40.0696	-20.0195	-30.5176	19.989	40.0391	60.0891	80.0781	100.159
59.1	-314.697	-248.23	-185.364	-121.338	-57.4341	6.5918	70.3125	135.071	199.89	265.015	331.238	-100.159	-80.1392	-60.0586	-40.0085	-20.0195	0	19.989	40.0085	60.0891	80.0781	100.159
59.2	-301.331	-237.671	-177.368	-116.028	-54.7485	6.53076	67.5049	129.7	191.895	254.272	317.383	-100.189	-80.1697	-60.0891	-40.0391	-20.0806	0	19.9585	40.0696	60.0586	80.0781	100.128
59.3	-289.551	-228.333	-170.349	-111.328	-52.4292	6.53076	65.1245	125	184.753	244.812	305.176	-100.128	-80.1392	-60.0891	-40.0085	-20.05	-30.5176	19.928	39.978	60.0281	80.0171	100.067
59.4	-278.687	-219.91	-163.94	-106.934	-50.354	6.53076	63.0493	120.544	178.101	236.145	294.067	-100.128	-80.0781	-60.0891	-40.0391	-20.05	-61.0352	19.928	39.978	60.0281	80.0171	100.067
59.5	-268.616	-212.036	-157.959	-102.844	-48.4009	6.5918	61.2183	116.394	171.875	228.027	283.752	-100.128	-80.1086	-60.0891	-40.0696	-20.0195	-61.0352	19.9585	39.978	60.0891	80.0781	100.098
59.6	-259.216	-204.529	-152.283	-98.999	-46.5088	6.5918	59.4482	112.366	166.016	220.276	274.109	-100.128	-80.1086	-60.0586	-40.0391	-20.0195	61.0352	20.0195	39.978	60.1196	80.1086	100.189
59.7	-250.549	-197.449	-146.912	-95.3979	-44.6777	6.5918	57.6782	108.582	160.4	212.891	264.954	-100.189	-80.1392	-60.0891	-40.0391	-20.0806	0	19.9585	40.0391	60.0586	80.1086	100.189
59.8	-242.432	-190.613	-141.785	-92.041	-42.9077	6.5918	55.9082	104.98	155.151	205.994	256.226	-100.128	-80.1392	-60.0586	-40.0085	-20.1111	-30.5176	19.928	40.0391	60.0586	80.1086	100.128
59.9	-234.619	-184.143	-136.963	-88.8061	-41.1987	6.5918	54.1382	101.562	150.208	199.463	247.986	-100.067	-80.1086	-60.1196	-40.0085	-20.0195	-61.0352	19.8975	40.0696	59.9976	80.0171	100.067
60	-227.051	-178.04	-132.324	-85.7544	-39.6728	6.65283	52.5513	98.2666	145.569	193.237	240.173	-100.128	-80.1697	-60.0586	-40.0391	-20.0195	-91.5527	19.9585	39.978	60.0586	80.0476	100.067
60.1	-219.666	-172.241	-127.869	-82.7637	-38.147	6.65283	51.0864	95.2148	141.113	187.256	232.788	-100.098	-80.1392	-60.0891	-40.0391	-19.989	-91.5527	19.989	39.9475	60.1196	80.0781	100.098
60.2	-212.585	-166.687	-123.596	-79.895	-36.7432	6.71387	49.6216	92.2241	136.841	181.458	225.769	-100.128	-80.1392	-60.0891	-40.0696	-20.0806	-30.5176	19.9585	39.978	60.0891	80.1086	100.159
60.3	-205.688	-161.377	-119.507	-77.2095	-35.4004	6.71387	48.2788	89.4165	132.69	175.842	219.177	-100.128	-80.1392	-60.0891	-40.0696	-20.1111	61.0352	19.928	40.0085	60.0891	80.1086	100.189
60.4	-199.036	-156.25	-115.601	-74.5239	-34.1187	6.71387	46.936	86.6699	128.662	170.471	212.83	-100.189	-80.1086	-60.0891	-40.0696	-20.0806	0	19.9585	39.978	60.0586	80.0171	100.128
60.5	-192.566	-151.367	-111.816	-72.0825	-32.8979	6.71387	45.7153	84.1675	124.756	165.344	206.726	-100.128	-80.1086	-60.1196	-40.0391	-20.1111	-30.5176	19.9585	40.0085	60.0281	80.0171	100.098
60.6	-186.34	-146.667	-108.215	-69.7021	-31.7383	6.71387	44.6167	81.7261	121.033	160.583	200.867	-100.128	-80.1392	-60.0586	-40.0696	-20.05	-61.0352	19.9585	40.0085	60.0586	80.0171	100.128
60.7	-180.359	-142.151	-104.736	-67.3828	-30.6396	6.65283	43.457	79.4067	117.493	156.067	195.19	-100.098	-80.1392	-60.0586	-40.0696	-20.0195	-30.5176	19.9585	40.0085	60.0586	80.1392	100.128
60.8	-174.561	-137.695	-101.379	-65.1855	-29.541	6.5918	42.2974	77.2095	114.136	151.794	189.819	-100.159	-80.1392	-60.1196	-40.1001	-19.989	-61.0352	19.989	40.0391	60.0586	80.0781	100.128
60.9	-169.189	-133.423	-98.2056	-62.9883	-28.4424	6.65283	41.1987	75.0732	111.023	147.522	184.753	-100.128	-80.1392	-60.0281	-40.0696	-20.0195	-30.5176	19.989	40.0085	60.0891	80.0781	100.128
61	-164.062	-129.395	-95.1538	-60.9131	-27.4658	6.65283	40.1611	72.998	108.032	143.494	179.993	-100.098	-80.1086	-60.0586	-40.0696	-20.0195	0	19.928	40.0085	60.0281	80.0781	100.098
61.1	-159.363	-125.549	-92.2852	-58.8989	-26.4893	6.65283	39.1846	70.9839	105.164	139.648	175.537	-100.159	-80.1086	-60.0586	-40.0696	-20.05	-30.5176	19.989	40.0085	60.0281	80.0171	100.098
61.2	-154.907	-121.887	-89.5386	-57.0679	-25.5737	6.65283	38.269	69.0918	102.356	135.925	171.265	-100.128	-80.0476	-60.1196	-40.0391	-20.05	-61.0352	19.989	39.9475	60.0281	80.0781	100.098
61.3	-150.635	-118.347	-86.9141	-55.1758	-24.6582	6.65283	37.2925	67.1997	99.6094	132.385	167.236	-100.159	-80.0171	-60.0586	-40.0696	-20.0806	-61.0352	19.989	40.0391	60.0891	80.0476	100.128
61.4	-146.484	-114.868	-84.4727	-53.4058	-23.8647	6.71387	36.377	65.4297	97.0459	129.089	163.391	-100.128	-80.0781	-60.0586	-40.0696	-20.0806	30.5176	20.0195	40.0085	60.0891	80.0476	100.098
61.5	-142.517	-111.511	-82.0923	-51.8188	-23.0103	6.7749	35.5225	63.7207	94.6045	126.038	159.912	-100.098	-80.0781	-60.0281	-40.0391	-19.9585	30.5176	19.989	40.0085	60.0891	80.0781	100.128
61.6	-138.733	-108.337	-79.7119	-50.2319	-22.2778	6.7749	34.668	62.1338	92.2241	123.169	156.616	-100.159	-80.1086	-60.1501	-40.0696	-20.0195	-30.5176	19.9585	40.0391	60.0281	80.1086	100.067
61.7	-135.071	-105.347	-77.3926	-48.584	-21.5454	6.65283	33.9355	60.6689	89.9048	120.483	153.564	-100.098	-80.1086	-60.0891	-40.0696	-20.05	-30.5176	19.989	40.0391	60.0281	80.0171	100.037
61.8	-131.592	-102.6	-75.0732	-46.936	-20.813	6.53076	33.1421	59.2651	87.5854	117.859	150.635	-100.189	-80.0781	-60.1501	-40.1001	-20.0195	-30.5176	19.9585	40.0085	60.0586	80.0476	100.067
61.9	-128.235	-99.9145	-72.876	-45.4102	-19.9585	6.5918	32.4097	57.8613	85.3882	115.356	147.827	-100.189	-80.0476	-60.0281	-40.0696	-20.0195	-30.5176	19.9585	40.0085	60.0586	80.0476	100.128
62	-124.878	-97.3511	-70.8008	-44.0674	-19.104	6.65283	31.7383	56.3354	83.313	112.854	145.142	-100.159	-80.0476	-60.0586	-40.0696	-20.0195	61.0352	19.989	40.0696	60.0891	80.0476	100.128
62.1	-121.704	-94.7876	-68.8477	-42.7856	-18.4326	6.71387	31.1279	54.8706	81.2988	110.535	142.578	-100.159	-80.0476	-60.0586	-40.0391	-20.0195	30.5176	19.9585	40.0696	60.1196	80.0476	100.128
62.2	-118.774	-92.3462	-66.9556	-41.5039	-17.8223	6.83594	30.5786	53.6499	79.3457	108.337	140.137	-100.189	-80.0781	-60.0281	-40.0085	-19.989	30.5176	20.0195	40.0696	60.0586	80.1086	100.098
62.3	-115.967	-90.0268	-65.1855	-40.2832	-17.334	6.83594	29.9683	52.4902	77.5757	106.201	137.878	-100.159	-80.1086	-60.0586	-40.0391	-20.0195	0	19.989	40.0391	60.0281	80.0476	100.128
62.4	-113.22	-87.7685	-63.4766	-39.1846	-16.7847	6.7749	29.3579	51.3916	75.9888	104.126	135.681	-100.189	-80.0781	-60.0586	-40.0085	-20.05	-61.0352	20.0195	40.0391	59.967	80.0781	100.067
62.5	-110.413	-85.5713	-61.8896	-38.147	-16.1743	6.65283	28.7476	50.293	74.5239	102.356	133.667	-100.128	-80.0476	-60.0891	-40.0696	-19.989	-30.5176	20.0195	40.0391	60.0281	80.0476	100.037
62.6	-107.727	-83.4351	-60.3027	-37.1094	-15.625	6.53076	28.1982	49.2554	73.1201	100.525	131.836	-100.098	-80.0781	-60.0891	-40.0391	-19.989	0	19.989	40.0085	60.0281	80.0781	100.128
62.7	-105.225	-81.4209	-58.7769	-36.0718	-15.0757	6.46973	27.6489	48.2178	71.7163	98.8159	130.066	-100.128	-80.0781	-60.0586	-40.0696	-20.0195	-30.5176	20.0195	39.978	60.0586	80.0781	100.067
62.8	-102.905	-79.4678	-57.373	-34.9731	-14.5874	6.46973	27.0996	47.3022	70.3125	97.168	128.418	-100.159	-80.1392	-60.0586	-40.0696	-19.989	30.5176	19.989	39.978	60.0586	80.0476	100.159
62.9	-100.708	-77.6367	-56.0303	-34.0576	-14.1602	6.53076	26.6113	46.3867	68.9697	95.7031	126.831	-100.159	-80.0476	-60.0586	-40.0085	-20.05	-30.5176	19.9585	40.0391	60.0281	80.0781	100.128
63	-98.5107	-75.8667	-54.6875	-33.0811	-13.7329	6.65283	26.1841	45.5933	67.6269	94.2993	125.366	-100.159	-80.1086	-60.1196	-40.0391	-20.0806	0	20.0195	40.0391	60.0586	80.0171	100.128
63.1	-96.4355	-74.0967	-53.4668	-32.2266	-13.3057	6.71387	25.8789	44.7388	66.4062	92.8955	123.962	-100.159	-80.0781	-60.1196	-40.0391	-20.0195	-30.5176	20.0195	40.0391	60.0281	80.0781	100.128
63.2	-94.4214	-72.4487	-52.3071	-31.4331	-12.8784	6.7749	25.5127	43.9453	65.2466	91.5527	122.742	-100.128	-80.0781	-60.1501	-40.0696	-20.05	30.5176	20.0195	40.0085	60.0281	80.0781	100.098
63.3	-92.5903	-70.8618	-51.1475	-30.6396	-12.4512	6.71387	25.0854	43.1519	64.27	90.271	121.643	-100.067	-80.0781	-60.1196	-40.1001	-20.05	-61.0352	19.9585	39.978	60.0586	80.0171	100.098
63.4	-90.7593	-69.397	-49.9878	-29.9072	-12.0239	6.65283	24.7192	42.4805	63.3545	89.1113	120.605	-100.128	-80.0781	-60.0891	-40.0696	-20.0195	-30.5176	19.9585	40.0085	60.0281	80.0171	100.128
63.5	-88.9893	-67.9932	-48.9502	-29.1748	-11.6577	6.5918	24.353	41.748	62.5	88.0737	119.568	-100.128	-80.0781	-60.0891	-40.0696	-20.05	0	19.9585	39.978	60.0586	80.0476	100.128
63.6	-87.2803	-66.5283	-47.8516	-28.5034	-11.2305	6.5918	24.0479	41.1377	61.5845	87.0361	118.53	-100.159	-80.0781	-60.1196	-40.1001	-19.989	-30.5176	20.0195	40.0391	60.0281	80.0476	100.098
63.7	-85.6323	-65.1855	-46.875	-27.9541	-10.8643	6.5918	23.6816	40.5273	60.6689	86.0596	117.554	-100.159	-80.1392	-60.0586	-40.0696	-20.05	0	20.0195	40.0391	60.0586	80.0171	100.128
63.8	-84.0454	-63.9038	-45.8984	-27.3437	-10.498	6.5918	23.3765	39.978	59.8755	85.022	116.638	-100.159	-80.0476	-60.0281	-40.0391	-19.989	-30.5176	20.0195	40.0696	59.9976	80.0476	100.098
63.9	-82.5195	-62.6831	-44.9219	-26.7334	-10.2539	6.65283	23.0713	39.3677	59.082	84.1064	115.906	-100.128	-80.0781	-60.1196	-40.0391	-20.05	61.0352	19.989	40.0391	60.0586	80.0476	100.159
64	-81.0547	-61.5234	-44.0063	-26.062	-9.94873	6.5918	22.7051	38.8184	58.3496	83.2519	115.173	-100.159	-80.0781	-60.0891	-40.0696	-20.0195	30.5176	19.989	40.0696	60.0586	80.0781	100.067
64.1	-79.6509	-60.3638	-43.0908	-25.4517	-9.64355	6.5918	22.3389	38.3301	57.6782	82.4585	114.38	-100.128	-80.1086	-60.1501	-39.978	-20.0806	0	19.989	40.0391	60.0586	80.0781	100.067
64.2	-78.3081	-59.3262	-42.2974	-24.8413	-9.33838	6.5918	22.0337	37.9028	57.0068	81.7261	113.647	-100.128	-80.1086	-60.0891	-40.1001	-19.989	-30.5176	19.989	40.0391	60.0281	80.0171	100.098
64.3	-76.9653	-58.2886	-41.5649	-24.231	-9.0332	6.46973	21.7895	37.4145	56.4575	81.0547	112.976	-100.128	-80.0781	-60.1196	-40.0391	-19.989	0	19.989	39.978	60.0586	80.0476	100.098
64.4	-75.6836	-57.251	-40.8936	-23.7427	-8.66699	6.46973	21.6064	36.9873	55.9082	80.3833	112.366	-100.159	-80.1086	-60.0586	-40.0696	-19.989	0	19.989	40.0391	60.0891	80.0476	100.128
64.5	-74.4629	-56.3354	-40.2222	-23.3154	-8.36182	6.46973	21.3623	36.499	55.3589	79.7119	111.816	-100.098	-80.0476	-60.0891	-40.0391	-19.989	30.5176	19.9585	40.0391	60.0891	80.0476	100.128
64.6	-73.3032	-55.4199	-39.5508	-22.8882	-8.05664	6.40869	21.1182	36.0107	54.8096	79.0405	111.328	-100.128	-80.1086	-60.1196	-40.0085	-20.05	61.0352	19.989	40.0391	60.0281	80.0171	100.128
64.7	-72.1436	-54.4434	-38.8184	-22.3999	-7.8125	6.40869	20.752	35.5835	54.1992	78.4912	110.901	-100.128	-80.0781	-60.0891	-40.0696	-19.989	0	19.989	40.0391	60.0281	80.0781	100.098
64.8	-71.106	-53.5889	-38.147	-21.9727	-7.62939	6.34766	20.4468	35.2173	53.6499	77.8809	110.413	-100.067	-80.0781	-60.1196	-40.1001	-19.928	-61.0352	20.0195	40.0085	60.0586	80.0476	100.067
64.9	-70.1294	-52.7344	-37.5366	-21.5454	-7.50732	6.34766	20.2026	34.9121	53.0395	77.3315	109.985	-100.128	-80.1086	-60.1196	-40.0696	-19.8975	0	20.0195	40.0696	60.0586	80.0476	100.067
65	-69.2139	-51.9409	-36.9263	-21.1182	-7.32422	6.34766	20.0806	34.5459	52.5513	76.7822	109.497	-100.159	-80.0476	-60.1196	-40.0696	-20.0195	0	20.05	40.0696	60.0586	79.9866	100.098
65.1	-68.3594	-51.2085	-36.438	-20.752	-7.14111	6.40869	19.8975	34.2407	52.124	76.355	109.009	-100.159	-80.0476	-60.0891	-40.0696	-20.0195	0	20.0195	40.0696	60.0281	80.0171	100.128
65.2	-67.4438	-50.5371	-35.8887	-20.3857	-6.89697	6.40869	19.7754	33.9355	51.6968	75.9888	108.459	-100.098	-80.0781	-60.1196	-40.1001	-20.0195	0	19.9585	40.0391	60.0586	80.0171	100.098
65.3	-66.5283	-49.8657	-35.3394	-20.0806	-6.71387	6.40869	19.5923	33.6914	51.3306	75.7446	108.032	-100.128	-80.0171	-60.0891	-40.0696	-20.0195	-30.5176	19.989	40.0391	59.9976	80.0171	100.067
65.4	-65.6128	-49.2554	-34.79	-19.7144	-6.53076	6.40869	19.3481	33.3862	50.8423	75.4394	107.788	-100.159	-80.0781	-60.0586	-40.0696	-19.9585	-30.5176	19.989	40.0696	60.0586	80.0171	100.067
65.5	-64.7583	-48.645	-34.2407	-19.4092	-6.34766	6.40869	19.104	33.1421	50.415	75.1953	107.666	-100.128	-80.0476	-60.0891	-40.0696	-20.0195	30.5176	20.05	40.0696	60.0586	80.0171	100.098
65.6	-63.9648	-48.0957	-33.7524	-19.165	-6.16455	6.40869	18.9209	32.8979	50.0488	74.8901	107.544	-100.159	-80.0171	-60.1196	-39.978	-20.0195	30.5176	20.05	40.1001	60.0891	80.0781	100.159
65.7	-63.1714	-47.5464	-33.3862	-18.9819	-6.04248	6.46973	18.7988	32.6538	49.8047	74.585	107.3	-100.159	-80.0781	-60.1196	-40.0696	-19.989	30.5176	19.989	40.0696	60.0281	80.0476	100.098
65.8	-62.439	-47.0581	-32.959	-18.7378	-5.92041	6.53076	18.6157	32.4707	49.5605	74.2187	106.995	-100.128	-80.0781	-60.1196	-40.1001	-19.989	-61.0352	19.989	40.0696	59.967	80.0171	100.128
65.9	-61.7065	-46.5698	-32.5317	-18.4937	-5.79834	6.5918	18.5547	32.2876	49.2554	73.9746	106.689	-100.067	-80.1392	-60.0281	-40.1001	-19.9585	-30.5176	19.928	40.0085	60.0281	80.0171	99.9756
66	-60.9741	-46.1426	-32.2266	-18.2495	-5.7373	6.53076	18.4326	32.1655	48.9502	73.6694	106.323	-100.189	-80.0476	-60.0891	-40.0696	-19.9585	0	20.05	40.0085	60.0586	80.0476	100.128
66.1	-60.2417	-45.6543	-31.9214	-17.9443	-5.7373	6.46973	18.2495	32.0435	48.645	73.4253	106.018	-100.159	-80.0171	-60.0586	-40.0391	-20.0195	0	20.05	40.0391	60.0891	80.0476	100.067
66.2	-59.6313	-45.227	-31.6162	-17.7002	-5.61523	6.40869	18.0664	31.9214	48.3398	73.1201	105.774	-100.159	-80.0476	-60.1196	-40.0391	-20.0195	61.0352	19.989	40.1001	60.0586	80.0476	100.067
66.3	-59.021	-44.7388	-31.25	-17.4561	-5.49316	6.40869	17.8833	31.7383	48.0347	72.8149	105.591	-100.159	-80.0476	-60.1501	-40.1001	-20.0806	30.5176	19.989	40.1001	60.0281	80.0171	100.098
66.4	-58.5327	-44.3726	-30.8838	-17.2119	-5.37109	6.40869	17.7002	31.5552	47.6685	72.5708	105.408	-100.128	-80.0476	-60.0586	-40.0391	-19.989	-30.5176	19.989	40.0391	60.0586	80.0476	100.006
66.5	-57.9834	-43.9453	-30.5176	-16.9678	-5.24902	6.40869	17.5781	31.311	47.4243	72.3267	105.225	-100.128	-80.0781	-60.0891	-40.0696	-19.989	0	20.05	39.978	60.0281	80.0171	100.037
66.6	-57.4951	-43.5181	-30.2124	-16.8457	-5.18799	6.40869	17.5171	31.1279	47.2412	72.0825	104.98	-100.128	-80.0781	-60.1196	-40.0696	-19.9585	-30.5176	20.0195	40.0696	60.0281	80.0476	100.037
66.7	-57.0068	-43.0908	-29.9072	-16.7236	-5.06592	6.40869	17.4561	31.0059	47.0581	71.8384	104.675	-100.159	-80.0781	-60.1196	-40.1001	-19.989	30.5176	20.0806	40.0085	59.9976	80.0171	100.067
66.8	-56.5796	-42.6636	-29.6631	-16.6016	-5.00488	6.46973	17.4561	30.8838	46.875	71.5332	104.37	-100.159	-80.0476	-60.0891	-40.1001	-19.989	61.0352	19.989	40.0391	60.0281	80.0171	100.067
66.9	-56.1523	-42.2363	-29.48	-16.4795	-4.88281	6.53076	17.334	30.7617	46.6919	71.2891	104.065	-100.159	-80.0781	-60.0586	-40.0085	-19.989	30.5176	19.9585	40.0391	60.0281	80.0171	100.067
67	-55.7251	-41.8701	-29.2358	-16.2964	-4.76074	6.53076	17.2729	30.5786	46.4478	70.9839	103.76	-100.098	-80.1086	-59.9976	-40.0391	-19.9585	30.5176	19.9585	40.0391	60.0281	79.9866	100.037
67.1	-55.2978	-41.5039	-29.0527	-16.1743	-4.63867	6.53076	17.2119	30.3955	46.2646	70.8008	103.516	-100.189	-80.0476	-60.0891	-40.0391	-19.989	0	20.0195	40.0391	60.0586	80.0476	100.098
67.2	-54.8096	-41.1987	-28.8086	-15.9912	-4.5166	6.46973	17.1509	30.2734	46.1426	70.6787	103.271	-100.159	-80.0781	-60.1807	-40.0391	-19.989	30.5176	20.0806	40.0391	60.0586	80.1392	100.128
67.3	-54.1992	-40.8936	-28.5645	-15.8081	-4.5166	6.46973	17.0898	30.1514	45.9595	70.5566	103.027	-100.098	-80.0476	-60.1196	-40.0085	-19.989	91.5527	20.0806	40.1001	60.0586	80.0781	100.159
67.4	-53.7109	-40.5273	-28.3813	-15.7471	-4.45557	6.46973	17.0288	30.0293	45.8374	70.4346	102.844	-100.128	-80.0781	-60.1196	-40.0696	-19.989	30.5176	20.0195	40.0391	59.967	80.0476	100.098
67.5	-53.2227	-40.1001	-28.1982	-15.686	-4.39453	6.46973	16.9067	29.9683	45.7153	70.3125	102.783	-100.098	-80.1086	-60.0891	-40.1001	-20.0195	-30.5176	19.928	40.0391	60.0281	80.0171	100.006
67.6	-52.8564	-39.7339	-28.0762	-15.564	-4.39453	6.46973	16.8457	29.8462	45.5933	70.2515	102.783	-100.189	-80.0476	-60.0586	-40.1001	-19.989	-30.5176	19.989	40.0696	60.0281	79.9561	99.9756
67.7	-52.4292	-39.4287	-27.8931	-15.5029	-4.27246	6.46973	16.7236	29.7241	45.5322	70.1904	102.722	-100.189	-80.0476	-60.0891	-40.0391	-20.0195	-61.0352	20.0195	40.0391	60.0281	80.0476	100.037
67.8	-52.063	-39.1235	-27.771	-15.4419	-4.08936	6.46973	16.6626	29.541	45.4712	70.1294	102.661	-100.189	-80.0171	-60.1196	-40.0696	-20.0195	30.5176	20.0195	40.0696	60.0586	80.0781	100.098
67.9	-51.8188	-38.9404	-27.5269	-15.3198	-3.96728	6.40869	16.6016	29.4189	45.4712	70.0684	102.539	-100.189	-80.0781	-60.1196	-40.0085	-19.989	61.0352	19.9585	40.0696	60.0281	80.1086	100.098
68	-51.6357	-38.7573	-27.3437	-15.1978	-3.84521	6.40869	16.6016	29.2969	45.4712	70.0073	102.356	-100.037	-80.0476	-60.1196	-40.0391	-19.989	61.0352	19.9585	40.0696	59.9976	80.0476	100.098
68.1	-51.3916	-38.6353	-27.0996	-15.0757	-3.84521	6.40869	16.6016	29.2358	45.4102	69.9463	102.173	-100.098	-80.1392	-60.0891	-40.1001	-19.989	30.5176	20.0195	40.0391	60.0586	79.9866	100.067
68.2	-51.1475	-38.4521	-26.9165	-14.8926	-3.78418	6.34766	16.6016	29.2358	45.4102	69.8852	102.051	-100.067	-80.0781	-60.0891	-40.0085	-19.989	-30.5176	20.0806	40.0696	59.9976	79.9866	100.037
68.3	-50.8423	-38.208	-26.7334	-14.8315	-3.72314	6.40869	16.6016	29.2358	45.4102	69.8242	101.929	-100.159	-80.0781	-60.1501	-40.0391	-19.9585	-30.5176	20.0806	40.0391	60.0281	80.0476	100.067
68.4	-50.5371	-37.9028	-26.6113	-14.7705	-3.66211	6.40869	16.5405	29.2358	45.3491	69.7021	101.807	-100.159	-80.0476	-60.1196	-40.0391	-20.0195	0	20.0195	40.0696	60.0586	80.0476	100.159
68.5	-50.2319	-37.5977	-26.4893	-14.7705	-3.60107	6.46973	16.4185	29.1748	45.2881	69.5801	101.685	-100.189	-80.0476	-60.1196	-40.0696	-20.05	0	19.989	40.0391	59.9976	80.0476	100.067
68.6	-49.9268	-37.3535	-26.3062	-14.7095	-3.54004	6.46973	16.3574	29.0527	45.227	69.458	101.562	-100.159	-80.0171	-60.0891	-40.0391	-20.05	0	19.9585	40.0391	60.0281	80.0171	100.006
68.7	-49.6216	-37.2314	-26.1841	-14.6484	-3.54004	6.46973	16.2964	28.9307	45.105	69.397	101.501	-100.159	-80.0476	-60.0891	-40.0391	-20.0195	-91.5527	19.989	40.0085	59.9976	79.9866	100.037
68.8	-49.3774	-37.1094	-26.062	-14.5264	-3.60107	6.46973	16.2354	28.8696	44.9219	69.2749	101.44	-100.159	-80.1086	-60.1196	-40.0696	-19.989	0	20.05	40.0696	60.0586	79.9866	100.098
68.9	-49.2554	-37.0483	-25.8789	-14.3433	-3.60107	6.46973	16.2354	28.6865	44.7388	69.1528	101.318	-100.098	-80.1086	-60.0891	-40.0391	-19.9585	30.5176	20.0195	40.1001	60.0891	80.0781	100.098
69	-49.0112	-36.9873	-25.8179	-14.2212	-3.60107	6.46973	16.2354	28.5645	44.5557	69.0308	101.257	-100.128	-80.0476	-60.0891	-40.0391	-19.9585	30.5176	19.989	40.1001	60.0586	80.0476	100.128
69.1	-48.8281	-36.7432	-25.6958	-14.0991	-3.60107	6.46973	16.2354	28.4424	44.4336	69.0308	101.135	-100.159	-80.0781	-60.0891	-40.1306	-20.0195	-61.0352	20.0195	40.0696	60.0586	80.0171	100.098
69.2	-48.5229	-36.5601	-25.5737	-14.0381	-3.479	6.53076	16.2354	28.5034	44.3115	69.0918	101.074	-100.159	-80.0171	-59.9976	-40.0696	-19.989	-30.5176	19.989	40.0391	59.9976	80.0476	100.037
69.3	-48.2178	-36.2549	-25.5127	-13.977	-3.41797	6.53076	16.1743	28.5645	44.3115	69.0918	101.013	-100.189	-80.0781	-60.0891	-40.0391	-19.989	-30.5176	20.05	40.0085	59.9976	79.9866	100.037
69.4	-47.9126	-36.0107	-25.4517	-13.855	-3.2959	6.5918	16.1743	28.6255	44.2505	69.0918	100.952	-100.098	-80.0781	-60.0586	-40.1001	-20.0195	-30.5176	19.989	40.0391	60.0891	79.9866	100.098
69.5	-47.6685	-35.7666	-25.3296	-13.7939	-3.23486	6.65283	16.1133	28.6255	44.1895	69.0308	100.952	-100.128	-80.0781	-60.0891	-40.0391	-20.0195	0	20.0195	40.0391	60.1501	80.0476	100.128
69.6	-47.4853	-35.5835	-25.2075	-13.7329	-3.17383	6.71387	16.0522	28.6255	44.1284	68.9087	100.952	-100.159	-80.1086	-60.0586	-40.0696	-19.989	0	20.0195	40.0696	60.0891	80.0476	100.128
69.7	-47.3022	-35.5225	-25.2075	-13.6108	-3.17383	6.71387	15.9912	28.4424	44.0674	68.8477	101.013	-100.128	-80.1392	-60.0891	-40.0696	-20.05	-30.5176	20.0195	40.1001	60.0281	80.0781	100.159
69.8	-47.1802	-35.4004	-25.2686	-13.6719	-3.05176	6.7749	15.9912	28.3203	44.0063	68.7256	101.013	-100.128	-80.0781	-60.1196	-40.1001	-19.989	-61.0352	19.9585	40.0391	59.9976	80.0781	100.067
69.9	-46.9971	-35.2783	-25.3296	-13.7329	-2.99072	6.83594	15.9302	28.1982	43.9453	68.6645	100.952	-100.159	-80.1086	-60.0891	-40.1001	-19.989	30.5176	20.0195	40.0391	60.0586	80.0476	100.006
70	-46.7529	-35.0952	-25.3296	-13.855	-2.99072	6.89697	15.9302	28.1372	43.9453	68.5425	100.891	-100.098	-80.0781	-60.0586	-40.0696	-20.0195	0	19.989	40.0391	60.0281	79.9866	100.037
70.1	-46.5698	-34.9121	-25.3296	-13.7939	-2.99072	6.83594	15.9302	28.0762	43.9453	68.4814	100.769	-100.098	-80.1392	-60.0281	-40.0696	-20.0195	-30.5176	19.989	40.0085	60.0586	80.0171	100.006
70.2	-46.3867	-34.79	-25.2075	-13.7939	-2.99072	6.71387	15.8691	28.1372	43.9453	68.3594	100.708	-100.128	-80.0781	-60.0586	-40.0696	-20.0806	30.5176	19.989	40.0085	60.1196	80.0781	100.098
70.3	-46.2646	-34.668	-25.0244	-13.7329	-2.99072	6.65283	15.7471	28.1982	44.0063	68.2983	100.708	-100.159	-80.0781	-60.0891	-40.0391	-20.0806	30.5176	19.9585	39.978	60.0891	80.0476	100.189
70.4	-46.1426	-34.5459	-24.8413	-13.6719	-2.99072	6.5918	15.625	28.1372	44.0063	68.3594	100.708	-100.189	-80.0781	-60.0891	-40.0391	-19.989	0	19.928	40.0391	60.0281	80.0781	100.098
70.5	-45.9595	-34.4849	-24.7192	-13.6108	-2.99072	6.53076	15.564	28.0762	43.8232	68.4814	100.708	-100.159	-80.0476	-60.1196	-40.0696	-20.05	-30.5176	20.0195	40.1001	60.1196	80.0476	100.098
70.6	-45.8374	-34.3628	-24.6582	-13.4888	-2.99072	6.53076	15.5029	28.0151	43.7012	68.4814	100.769	-100.098	-80.0781	-60.1196	-40.0696	-19.989	0	20.0195	40.0085	60.0281	80.0171	100.067
70.7	-45.5933	-34.2407	-24.6582	-13.3667	-2.92969	6.53076	15.5029	28.0151	43.5791	68.4204	100.708	-100.128	-80.0781	-60.1196	-40.1001	-19.989	-30.5176	19.989	40.0391	60.0586	80.0476	100.037
70.8	-45.4102	-34.1187	-24.5972	-13.3057	-2.86865	6.53076	15.5029	28.0151	43.5181	68.2983	100.647	-100.189	-80.0781	-60.0586	-40.0696	-20.0195	0	19.9585	39.978	60.0586	80.0476	100.128
70.9	-45.227	-33.9966	-24.5972	-13.1836	-2.80762	6.46973	15.5029	28.0151	43.457	68.2373	100.586	-100.189	-80.0781	-60.0281	-40.0696	-20.0195	-61.0352	19.9585	40.0085	60.0281	80.0476	100.067
71	-45.0439	-33.9355	-24.4751	-13.1226	-2.80762	6.46973	15.5029	28.0151	43.396	68.1763	100.647	-100.159	-80.1086	-60.0891	-40.0696	-20.0806	-30.5176	19.9585	40.0085	60.0281	80.0476	100.067
71.1	-44.9219	-33.8745	-24.4141	-13.1836	-2.80762	6.40869	15.5029	28.0151	43.396	68.1763	100.708	-100.159	-80.0476	-60.0891	-40.0391	-20.0195	0	19.989	39.978	60.0586	80.0171	100.067
71.2	-44.6777	-33.8135	-24.292	-13.1836	-2.80762	6.34766	15.564	28.0151	43.396	68.2983	100.83	-100.128	-80.1392	-60.0586	-40.0085	-19.989	0	20.1111	40.0085	60.0586	80.0781	100.098
71.3	-44.4946	-33.8135	-24.1699	-13.1836	-2.86865	6.34766	15.5029	28.0151	43.396	68.4204	100.891	-100.159	-80.1392	-60.1196	-40.0696	-19.989	30.5176	20.0195	40.0085	60.0281	80.0171	100.098
71.4	-44.3115	-33.7524	-24.0479	-13.1836	-2.80762	6.28662	15.5029	27.9541	43.396	68.5425	100.83	-100.098	-80.1392	-60.0586	-40.0391	-19.989	30.5176	20.0195	40.0085	60.0586	80.0476	100.067
71.5	-44.1895	-33.6304	-23.9258	-13.1836	-2.74658	6.22559	15.5029	27.9541	43.457	68.6035	100.83	-100.067	-80.0781	-60.0891	-40.0391	-19.989	30.5176	19.989	39.978	60.0281	80.0476	100.098
71.6	-44.1284	-33.5693	-23.8037	-13.2446	-2.68555	6.16455	15.5029	28.0151	43.457	68.6645	100.83	-100.128	-80.1086	-60.0891	-40.1306	-20.0195	-30.5176	19.989	39.978	59.967	80.0476	100.098
71.7	-44.0674	-33.5083	-23.7427	-13.3057	-2.68555	6.16455	15.5029	28.0151	43.457	68.6035	100.83	-100.098	-80.0476	-60.0891	-40.0391	-20.0195	-30.5176	19.989	40.0391	60.0281	80.1086	100.098
71.8	-44.0674	-33.3862	-23.6816	-13.3057	-2.68555	6.16455	15.5029	28.0151	43.457	68.5425	100.769	-100.159	-80.1392	-60.0586	-40.0696	-20.05	0	19.9585	39.978	60.0281	80.0171	100.159
71.9	-44.0063	-33.3862	-23.6206	-13.3057	-2.74658	6.22559	15.5029	28.0762	43.457	68.4814	100.769	-100.159	-80.1392	-60.0891	-40.0391	-20.05	30.5176	19.9585	40.0085	60.0281	80.0476	100.128
72	-43.9453	-33.3252	-23.5596	-13.3057	-2.80762	6.28662	15.5029	28.0762	43.457	68.4814	100.647	-100.159	-80.1392	-60.1196	-40.0391	-19.989	30.5176	19.9585	40.0085	60.0586	80.0171	100.098
72.1	-43.8843	-33.3252	-23.4375	-13.3057	-2.74658	6.34766	15.5029	28.1372	43.396	68.4814	100.525	-100.098	-80.1086	-60.1196	-40.0391	-20.0806	0	19.989	40.0696	60.1196	80.0476	100.159
72.2	-43.8232	-33.2642	-23.3765	-13.2446	-2.74658	6.34766	15.4419	28.1982	43.396	68.3594	100.525	-100.189	-80.0781	-60.1196	-40.0696	-20.0806	0	19.989	40.0391	60.0586	80.0476	100.128
72.3	-43.7622	-33.2642	-23.2544	-13.2446	-2.62451	6.40869	15.5029	28.2593	43.457	68.2983	100.525	-100.098	-80.1086	-60.0891	-40.0696	-20.0806	-30.5176	19.989	40.0391	60.0281	80.0781	100.128
72.4	-43.7012	-33.2031	-23.1323	-13.1836	-2.56348	6.46973	15.564	28.2593	43.457	68.1763	100.525	-100.098	-80.0781	-60.0281	-40.0696	-19.989	-30.5176	19.9585	39.978	60.0586	80.0476	100.067
72.5	-43.6401	-33.2031	-23.0103	-13.1836	-2.50244	6.53076	15.686	28.2593	43.457	68.1763	100.586	-100.159	-80.0476	-60.0586	-40.0391	-20.0195	0	20.0195	39.978	60.0586	80.0476	100.098
72.6	-43.5181	-33.1421	-22.9492	-13.1836	-2.50244	6.53076	15.8081	28.3203	43.457	68.1763	100.647	-100.098	-80.0781	-60.0281	-40.0696	-20.1111	-30.5176	19.9585	40.0391	60.0586	80.0781	100.098
72.7	-43.457	-33.0811	-22.8882	-13.1836	-2.50244	6.53076	15.8691	28.3813	43.5791	68.1763	100.708	-100.098	-80.0781	-60.0586	-40.0696	-20.1111	0	19.989	40.0391	60.0586	80.0781	100.128
72.8	-43.396	-32.959	-22.8882	-13.1226	-2.56348	6.46973	15.9302	28.4424	43.6401	68.2373	100.708	-100.128	-80.1086	-60.0586	-40.0391	-20.0806	30.5176	19.928	40.0085	60.0281	80.0476	100.159
72.9	-43.335	-32.8369	-22.8882	-13.0615	-2.62451	6.46973	15.9912	28.4424	43.6401	68.2373	100.769	-100.067	-80.1697	-60.0586	-40.0696	-19.989	-30.5176	19.9585	40.0696	60.0586	80.0781	100.098
73	-43.2739	-32.7759	-22.8882	-13.0615	-2.68555	6.46973	15.9912	28.5034	43.6401	68.2373	100.83	-100.128	-80.1392	-60.0586	-40.0085	-20.0195	-30.5176	19.9585	39.978	60.0281	80.0476	100.098
73.1	-43.2739	-32.6538	-22.8271	-13.0615	-2.74658	6.40869	15.9302	28.5034	43.6401	68.2983	100.769	-100.159	-80.1392	-60.0586	-40.0696	-20.0195	-30.5176	19.9585	40.0391	60.0586	80.0781	100.159
73.2	-43.2129	-32.5317	-22.8271	-13.1226	-2.80762	6.40869	15.9302	28.5645	43.6401	68.3594	100.647	-100.159	-80.1392	-60.0891	-40.0391	-20.05	0	19.9585	40.0696	60.0281	80.0781	100.128
73.3	-43.1519	-32.4707	-22.8271	-13.1836	-2.80762	6.40869	15.8691	28.5645	43.6401	68.3594	100.525	-100.159	-80.1392	-60.0586	-40.0391	-20.0806	-30.5176	19.989	39.978	59.9976	80.0781	100.128
73.4	-43.0908	-32.4097	-22.7661	-13.2446	-2.68555	6.46973	15.8081	28.6255	43.5791	68.2983	100.403	-100.098	-80.0781	-59.9976	-40.1001	-20.0806	-30.5176	19.928	40.0085	60.0586	80.0476	100.067
73.5	-43.0298	-32.4097	-22.8271	-13.3057	-2.62451	6.46973	15.7471	28.6255	43.5791	68.2373	100.281	-100.067	-80.1392	-60.0891	-40.0696	-20.0806	-61.0352	19.928	39.917	60.0281	80.0476	100.128
73.6	-42.9077	-32.3486	-22.8271	-13.3057	-2.56348	6.53076	15.7471	28.6865	43.5181	68.1763	100.281	-100.159	-80.1697	-60.0586	-40.0696	-20.0806	-91.5527	20.0195	39.9475	60.0586	80.0476	100.128
73.7	-42.7246	-32.2876	-22.8271	-13.3057	-2.56348	6.46973	15.7471	28.7476	43.5181	68.1763	100.342	-100.128	-80.1392	-60.0281	-40.0696	-20.0806	0	19.989	40.0085	60.0891	80.1086	100.128
73.8	-42.5415	-32.1655	-22.7661	-13.3057	-2.62451	6.40869	15.7471	28.7476	43.5181	68.2373	100.464	-100.098	-80.0781	-60.0586	-40.0391	-20.0195	30.5176	20.0195	40.0391	60.0586	80.1392	100.159
73.9	-42.4194	-32.1045	-22.7661	-13.3667	-2.62451	6.34766	15.686	28.7476	43.5181	68.2373	100.525	-100.189	-80.1086	-60.0586	-40.1001	-20.05	-61.0352	19.989	40.0085	60.0281	80.0781	100.098
74	-42.4194	-32.0435	-22.7661	-13.3667	-2.62451	6.34766	15.686	28.7476	43.5181	68.2983	100.586	-100.098	-80.1697	-60.0586	-40.0696	-20.0195	-61.0352	19.928	39.978	60.0586	80.0476	100.067
74.1	-42.4805	-32.0435	-22.7661	-13.3667	-2.62451	6.34766	15.7471	28.7476	43.5181	68.2983	100.586	-100.159	-80.0781	-60.0281	-40.0696	-19.989	-61.0352	19.9585	39.9475	60.0891	80.0476	100.037
74.2	-42.5415	-31.9824	-22.7661	-13.3057	-2.68555	6.34766	15.8081	28.8086	43.5181	68.2983	100.464	-100.159	-80.1392	-60.0586	-40.0696	-20.0806	-61.0352	19.989	39.9475	60.0891	80.0476	100.159
74.3	-42.4805	-31.9214	-22.7661	-13.3057	-2.68555	6.34766	15.8691	28.8696	43.5181	68.2983	100.464	-100.159	-80.0781	-60.0586	-40.0085	-20.1111	30.5176	19.9585	39.978	60.1501	80.1086	100.22
74.4	-42.3584	-31.8603	-22.7051	-13.3667	-2.68555	6.40869	15.8691	28.9307	43.5791	68.2373	100.403	-100.159	-80.1697	-60.0281	-40.0391	-20.05	-30.5176	19.9585	40.0391	60.0281	80.0476	100.098
74.5	-42.1753	-31.7993	-22.7051	-13.3667	-2.68555	6.40869	15.8691	28.9917	43.5791	68.2373	100.403	-100.098	-80.1392	-60.0586	-40.0696	-20.0195	-30.5176	19.8669	39.978	60.0586	80.1392	100.128
74.6	-42.1143	-31.8603	-22.7051	-13.3667	-2.68555	6.40869	15.8691	28.9917	43.5791	68.2983	100.403	-100.159	-80.1697	-60.0586	-40.0696	-19.989	-61.0352	19.928	39.9475	60.0281	80.0476	100.098
74.7	-42.0532	-31.8603	-22.7051	-13.3057	-2.74658	6.46973	15.9302	28.9307	43.5181	68.3594	100.403	-100.159	-80.1392	-60.0586	-40.0391	-20.0195	0	20.0195	39.978	60.0586	80.0476	100.098
74.8	-41.9922	-31.9214	-22.644	-13.3057	-2.74658	6.40869	16.0522	28.8696	43.5181	68.3594	100.403	-100.159	-80.0781	-60.0891	-40.0696	-20.0806	-30.5176	19.989	40.0391	60.0891	80.1086	100.128
74.9	-41.9922	-31.9214	-22.583	-13.3057	-2.74658	6.40869	16.1133	28.8696	43.5791	68.3594	100.464	-100.189	-80.0781	-60.0891	-40.0696	-20.1111	-61.0352	20.0195	40.0696	60.0586	80.0781	100.128
75	-41.9922	-31.9214	-22.644	-13.3057	-2.68555	6.40869	16.1743	28.8696	43.5181	68.3594	100.525	-100.159	-80.1392	-60.0281	-40.1306	-20.05	0	19.9585	39.978	60.0891	80.0781	100.098
75.1	-41.9922	-31.7993	-22.644	-13.3667	-2.68555	6.40869	16.2354	28.9307	43.5181	68.2983	100.525	-100.128	-80.1697	-60.0281	-40.1001	-20.0806	-61.0352	19.8669	39.917	60.0586	80.0476	100.067
75.2	-42.0532	-31.6162	-22.7661	-13.4277	-2.62451	6.40869	16.2964	28.8696	43.5181	68.4204	100.525	-100.159	-80.1392	-60.0891	-40.0391	-20.0806	-61.0352	19.928	39.9475	60.0586	80.0171	100.098
75.3	-42.0532	-31.5552	-22.8271	-13.4277	-2.56348	6.40869	16.2354	28.8696	43.5791	68.5425	100.464	-100.128	-80.1086	-60.0586	-40.0391	-19.989	-30.5176	19.9585	39.917	60.0891	80.0171	100.098
75.4	-42.0532	-31.4941	-22.8271	-13.4277	-2.56348	6.40869	16.2354	28.8696	43.7012	68.6035	100.403	-100.189	-80.1086	-60.1501	-40.0391	-20.05	30.5176	19.989	40.0696	60.1196	80.0781	100.128
75.5	-41.9922	-31.4941	-22.8271	-13.4277	-2.50244	6.40869	16.2354	28.8696	43.8232	68.6035	100.342	-100.128	-80.1086	-60.0891	-40.0696	-20.0195	30.5176	19.989	40.0391	60.0586	80.0781	100.189
75.6	-41.9922	-31.5552	-22.7661	-13.4277	-2.50244	6.40869	16.2964	28.9307	43.9453	68.6035	100.281	-100.159	-80.1392	-60.0281	-40.1001	-20.0195	30.5176	19.928	40.0085	59.9976	80.0781	100.098
75.7	-41.9311	-31.6162	-22.7051	-13.4277	-2.50244	6.46973	16.2964	28.9307	44.0063	68.5425	100.22	-100.128	-80.1697	-60.0586	-40.1001	-19.989	-91.5527	19.928	39.9475	59.9976	80.0781	100.067
75.8	-41.9922	-31.6162	-22.7051	-13.4277	-2.50244	6.53076	16.2964	28.9917	44.0674	68.5425	100.22	-100.159	-80.0781	-60.0281	-40.1001	-20.0195	-91.5527	19.928	39.917	60.0891	80.0781	100.098
75.9	-42.0532	-31.6162	-22.7051	-13.4888	-2.50244	6.5918	16.2964	29.0527	44.0674	68.6035	100.22	-100.128	-80.0476	-60.0586	-39.978	-20.05	-30.5176	19.9585	39.978	60.0586	80.0476	100.128
76	-42.1143	-31.5552	-22.7051	-13.4277	-2.56348	6.5918	16.3574	28.9307	44.0063	68.6035	100.22	-100.159	-80.0781	-60.0891	-40.0085	-20.0806	-30.5176	19.989	40.0696	60.0891	80.0476	100.128
76.1	-42.1143	-31.5552	-22.7051	-13.4277	-2.56348	6.65283	16.4185	28.8696	43.8843	68.6035	100.22	-100.067	-80.1697	-60.0891	-40.0696	-20.0806	30.5176	19.928	39.978	60.0281	80.0781	100.128
76.2	-42.1143	-31.5552	-22.7661	-13.3667	-2.62451	6.65283	16.4795	28.7476	43.8232	68.6035	100.22	-100.128	-80.2002	-60.0891	-40.0696	-20.0195	0	19.8975	39.978	60.0586	80.0476	100.098
76.3	-42.0532	-31.5552	-22.7661	-13.3667	-2.62451	6.65283	16.4795	28.6865	43.8232	68.6035	100.342	-100.098	-80.1392	-60.0586	-40.0391	-19.9585	-30.5176	19.928	39.978	59.967	80.0476	100.098
76.4	-41.9922	-31.4941	-22.7661	-13.3057	-2.62451	6.5918	16.5405	28.6255	43.8843	68.5425	100.342	-100.159	-80.0781	-60.0586	-40.0391	-20.0195	-61.0352	19.989	40.0085	60.0586	80.0781	100.159
76.5	-41.9922	-31.4941	-22.7051	-13.3057	-2.62451	6.53076	16.4795	28.6865	43.8843	68.5425	100.281	-100.098	-80.0781	-60.0891	-40.0696	-20.05	-30.5176	20.0195	40.0391	60.0891	80.1392	100.159
76.6	-42.1143	-31.5552	-22.7051	-13.3667	-2.68555	6.53076	16.4795	28.7476	44.0063	68.4814	100.22	-100.128	-80.1086	-60.0586	-40.0696	-20.0806	-30.5176	19.989	40.0391	59.9976	80.1086	100.159
76.7	-42.1753	-31.5552	-22.644	-13.3057	-2.74658	6.53076	16.4795	28.8086	44.0063	68.4814	100.22	-100.067	-80.1392	-60.0281	-40.1001	-20.0195	0	19.9585	40.0391	60.0891	80.0781	100.128
76.8	-42.2363	-31.6162	-22.644	-13.3057	-2.74658	6.53076	16.4795	28.8696	44.0674	68.4814	100.342	-100.098	-80.1392	-60.0281	-40.0085	-20.0195	-30.5176	19.8975	39.9475	59.9976	80.0781	100.128
76.9	-42.2363	-31.5552	-22.583	-13.3057	-2.80762	6.53076	16.4185	28.9307	44.0674	68.5425	100.464	-100.128	-80.1086	-60.0891	-40.0696	-20.0195	0	19.9585	39.978	60.0891	80.0781	100.067
77	-42.1143	-31.5552	-22.644	-13.3057	-2.80762	6.53076	16.4185	28.8696	44.0674	68.5425	100.647	-100.159	-80.0781	-60.0586	-40.0391	-20.0195	-30.5176	19.9585	40.0391	60.0891	80.0476	100.159
77.1	-41.9922	-31.4941	-22.644	-13.3667	-2.80762	6.53076	16.3574	28.9307	44.0674	68.5425	100.769	-100.128	-80.1086	-60.0891	-40.0391	-19.989	-30.5176	19.9585	40.0696	60.0891	80.1392	100.159
77.2	-41.8701	-31.4331	-22.7051	-13.3057	-2.80762	6.46973	16.3574	28.9307	44.0674	68.5425	100.83	-100.128	-80.1392	-60.0891	-40.0696	-20.0806	-61.0352	20.0195	40.0696	59.9976	80.1086	100.159
77.3	-41.8091	-31.3721	-22.7051	-13.3057	-2.74658	6.46973	16.3574	28.9307	44.1284	68.5425	100.891	-100.006	-80.0476	-60.0586	-40.1001	-20.05	-91.5527	19.9585	40.0391	60.0586	80.0781	100.098
77.4	-41.8701	-31.311	-22.7051	-13.3057	-2.68555	6.53076	16.3574	28.9307	44.1284	68.6035	100.952	-100.098	-80.1086	-60.0586	-40.0391	-20.05	-61.0352	19.928	39.9475	60.0586	80.0781	100.037
77.5	-41.9311	-31.3721	-22.7051	-13.2446	-2.62451	6.53076	16.3574	28.9917	44.1895	68.6035	101.074	-100.098	-80.1392	-60.0891	-40.1001	-20.0806	-61.0352	19.9585	39.9475	60.1196	80.0171	100.128
77.6	-42.0532	-31.3721	-22.644	-13.1226	-2.56348	6.65283	16.4185	28.9917	44.1895	68.5425	101.196	-100.128	-80.1086	-60.0891	-40.0391	-20.0806	-61.0352	19.9585	40.0085	60.0891	80.0781	100.159
77.7	-41.9922	-31.4331	-22.644	-13.0615	-2.56348	6.71387	16.4795	28.9917	44.1895	68.4814	101.257	-100.128	-80.1697	-60.0586	-40.0391	-20.05	-30.5176	19.928	40.0085	60.0586	80.1086	100.159
77.8	-41.9922	-31.3721	-22.644	-13.1226	-2.56348	6.7749	16.6016	29.0527	44.1895	68.3594	101.379	-100.128	-80.0781	-60.1196	-40.0391	-20.0195	-61.0352	19.9585	40.0391	60.0281	80.1086	100.159
77.9	-41.9922	-31.3721	-22.644	-13.1836	-2.62451	6.7749	16.6016	29.1138	44.1895	68.4204	101.44	-100.098	-80.0781	-60.1196	-40.1001	-19.9585	-30.5176	20.0195	40.0391	59.9976	80.1086	100.128
78	-41.9311	-31.4331	-22.644	-13.1836	-2.62451	6.71387	16.5405	29.1748	44.1284	68.4814	101.501	-100.098	-80.1086	-60.0586	-40.0391	-20.0195	-30.5176	19.928	40.0391	60.0281	80.0781	100.037
78.1	-41.8091	-31.311	-22.7051	-13.2446	-2.68555	6.71387	16.4795	29.1748	44.1284	68.5425	101.562	-100.098	-80.0476	-60.1196	-40.1001	-20.0195	-61.0352	19.989	39.9475	59.9976	80.0476	100.098
78.2	-41.748	-31.25	-22.7051	-13.3057	-2.74658	6.65283	16.4795	29.1748	44.1284	68.6645	101.624	-100.128	-80.0781	-60.0281	-40.0391	-20.05	-30.5176	20.0195	40.0085	60.0891	80.1086	100.159
78.3	-41.748	-31.1279	-22.583	-13.3667	-2.86865	6.65283	16.5405	29.1138	44.2505	68.6645	101.624	-100.128	-80.0781	-60.0586	-40.0391	-20.1111	-91.5527	19.9585	40.0696	60.1196	80.0781	100.067
78.4	-41.8091	-31.0669	-22.522	-13.3057	-2.99072	6.5918	16.5405	29.0527	44.2505	68.7256	101.624	-100.159	-80.0781	-60.1501	-40.1001	-20.0806	-30.5176	19.9585	39.978	60.0586	80.0171	100.128
78.5	-41.8701	-31.0669	-22.522	-13.2446	-2.99072	6.46973	16.5405	29.0527	44.3726	68.7256	101.624	-100.159	-80.0781	-60.0891	-40.0391	-20.0195	61.0352	19.989	40.0085	60.1196	80.0781	100.128
78.6	-41.8701	-31.0059	-22.522	-13.2446	-2.86865	6.53076	16.4795	29.1138	44.3726	68.7866	101.624	-100.128	-80.0781	-60.1196	-40.0391	-19.989	0	19.9585	40.0085	60.0586	80.0476	100.098
78.7	-41.8091	-31.0059	-22.522	-13.2446	-2.80762	6.5918	16.3574	29.0527	44.3726	68.8477	101.624	-100.159	-80.0781	-60.0891	-40.0696	-19.989	0	20.05	40.0085	60.0281	79.9866	100.067
78.8	-41.748	-30.9448	-22.522	-13.3057	-2.74658	6.65283	16.4185	28.9917	44.3726	68.8477	101.624	-100.189	-80.0781	-60.0281	-40.0391	-19.989	0	20.0195	39.978	60.0891	80.1086	100.128
78.9	-41.687	-30.9448	-22.583	-13.3057	-2.74658	6.71387	16.4795	28.9917	44.3115	68.8477	101.562	-100.189	-80.0476	-60.0281	-40.0391	-20.05	0	19.989	40.0696	60.0891	80.1086	100.067
79	-41.5649	-30.9448	-22.583	-13.3057	-2.80762	6.71387	16.5405	29.0527	44.3115	68.7866	101.501	-100.189	-80.1086	-60.0586	-40.0391	-20.0195	30.5176	19.989	40.0696	60.0586	80.0781	100.128
79.1	-41.3818	-31.0059	-22.644	-13.2446	-2.80762	6.71387	16.6016	29.0527	44.3726	68.8477	101.501	-100.189	-80.0476	-60.0586	-40.0391	-20.0195	-61.0352	19.9585	40.0391	60.0891	80.0781	100.098
79.2	-41.1987	-31.0059	-22.644	-13.2446	-2.80762	6.5918	16.6626	29.1138	44.4336	68.9697	101.562	-100.189	-80.1086	-60.0891	-40.0391	-20.0195	0	19.989	40.0085	60.0281	80.0171	100.037
79.3	-41.1377	-30.9448	-22.583	-13.2446	-2.74658	6.53076	16.6626	29.1138	44.4336	69.0918	101.685	-100.128	-80.0781	-60.0281	-40.0391	-20.05	0	20.0195	40.0085	60.0891	80.0171	100.037
79.4	-41.0156	-30.8228	-22.522	-13.3057	-2.68555	6.40869	16.6626	29.1748	44.4336	69.1528	101.868	-100.159	-80.0781	-60.0586	-40.0696	-20.05	61.0352	19.9585	40.0085	60.0281	80.0171	100.067
79.5	-40.8936	-30.8228	-22.4609	-13.3057	-2.62451	6.34766	16.6626	29.1748	44.3726	69.0918	101.99	-100.159	-80.0781	-60.0891	-40.0085	-19.989	30.5176	19.9585	39.978	60.0281	80.0476	100.128
79.6	-40.8325	-30.8838	-22.3999	-13.3667	-2.62451	6.40869	16.6626	29.1748	44.3726	69.0918	101.99	-100.159	-80.0781	-60.0891	-40.0696	-20.0195	-30.5176	19.989	40.0391	59.967	80.0781	100.098
79.7	-40.8325	-30.8838	-22.3389	-13.4277	-2.68555	6.53076	16.6626	29.1748	44.3115	69.0918	101.929	-100.159	-80.0476	-60.0891	-40.0696	-19.989	0	19.989	40.0391	60.0281	80.0476	100.037
79.8	-40.8325	-30.8228	-22.3999	-13.3667	-2.68555	6.71387	16.7847	29.1748	44.3115	69.0918	101.868	-100.128	-80.1086	-60.0891	-40.0391	-20.0195	0	20.05	40.0391	59.9976	80.0171	100.037
79.9	-40.8325	-30.7007	-22.3999	-13.3667	-2.80762	6.83594	16.9067	29.1138	44.2505	69.0308	101.807	-100.128	-80.1392	-60.0891	-40.0391	-20.0195	0	19.989	39.978	60.0586	80.0476	100.128
80	-40.8936	-30.6396	-22.4609	-13.3057	-2.86865	6.83594	16.9678	29.1138	44.2505	69.0308	101.746	-100.159	-80.1392	-60.0891	-40.0696	-20.1111	-30.5176	19.989	39.978	60.0586	80.0476	100.098
80.1	-40.9546	-30.6396	-22.522	-13.2446	-2.92969	6.7749	17.0288	29.1138	44.2505	69.1528	101.624	-100.159	-80.1086	-60.0891	-40.0391	-20.0195	0	19.9585	40.0391	60.0281	80.0476	100.098
80.2	-40.9546	-30.7007	-22.522	-13.2446	-2.92969	6.71387	17.0288	29.1748	44.2505	69.2139	101.501	-100.128	-80.1086	-60.1196	-40.0085	-20.1111	0	19.9585	40.0085	60.0586	80.0476	100.098
80.3	-40.9546	-30.7007	-22.522	-13.1836	-2.86865	6.65283	16.9678	29.1748	44.2505	69.2749	101.501	-100.159	-80.1392	-60.1196	-40.0085	-20.0195	0	19.9585	40.0391	60.0281	80.0476	100.098
80.4	-40.9546	-30.7617	-22.522	-13.2446	-2.80762	6.5918	16.9678	29.2358	44.2505	69.2139	101.501	-100.128	-80.0781	-60.0891	-40.0696	-20.1111	61.0352	19.989	40.0391	60.0586	80.0781	100.159
80.5	-41.0156	-30.7617	-22.522	-13.3057	-2.74658	6.53076	16.9678	29.2358	44.2505	69.2139	101.501	-100.159	-80.0476	-60.0891	-40.0696	-20.0195	0	19.989	40.0696	60.0281	80.0781	100.128
80.6	-41.0767	-30.8228	-22.522	-13.3667	-2.74658	6.53076	16.9678	29.2358	44.3115	69.2749	101.501	-100.159	-80.0781	-60.0891	-40.0391	-20.05	30.5176	19.989	40.0391	60.0281	80.0476	100.128
80.7	-41.1377	-30.8228	-22.4609	-13.3667	-2.74658	6.53076	16.9678	29.1748	44.3115	69.2139	101.44	-100.159	-80.0171	-60.1196	-40.0391	-20.0195	0	19.928	40.0391	60.0586	80.0476	100.067
80.8	-41.1987	-30.8228	-22.4609	-13.2446	-2.80762	6.53076	16.9067	29.1748	44.4336	69.1528	101.379	-100.159	-80.0476	-60.0891	-40.0391	-20.0806	0	19.989	40.0391	60.0586	80.0476	100.067
80.9	-41.3208	-30.8228	-22.4609	-13.2446	-2.86865	6.46973	16.9067	29.1748	44.4946	69.0308	101.318	-100.159	-80.0781	-60.1196	-40.0085	-20.0195	-30.5176	19.928	40.0696	60.0891	80.0171	100.067
81	-41.4429	-30.8228	-22.3999	-13.2446	-2.86865	6.46973	16.9067	29.1138	44.5557	68.9087	101.196	-100.098	-80.0781	-60.0586	-40.0391	-20.0806	30.5176	19.9585	40.0391	60.0281	80.0171	100.128
81.1	-41.5649	-30.8838	-22.3999	-13.2446	-2.80762	6.40869	16.9067	29.1138	44.5557	68.7866	101.135	-100.128	-80.0781	-60.0891	-40.0391	-19.9585	0	19.9585	39.978	60.0586	80.0476	100.128
81.2	-41.626	-30.9448	-22.3999	-13.3057	-2.80762	6.40869	16.9067	29.1138	44.5557	68.6645	101.013	-100.128	-80.0476	-60.1501	-40.0391	-19.989	30.5176	19.989	40.0391	60.0281	80.0781	100.159
81.3	-41.5649	-30.9448	-22.3999	-13.2446	-2.80762	6.40869	16.9678	29.0527	44.5557	68.6645	100.952	-100.159	-80.0476	-60.1196	-40.0391	-19.989	-30.5176	19.989	40.1001	60.0586	80.0476	100.098
81.4	-41.3818	-30.9448	-22.3999	-13.2446	-2.86865	6.46973	16.9678	29.1138	44.4946	68.6645	100.952	-100.159	-80.0781	-60.0891	-40.0696	-20.0195	30.5176	19.989	40.0696	60.0586	80.0476	100.098
81.5	-41.2598	-30.8838	-22.4609	-13.2446	-2.92969	6.46973	16.9678	29.1138	44.4946	68.7866	100.952	-100.128	-80.0476	-60.0281	-40.0391	-20.05	0	20.0195	40.0391	60.0586	80.0781	100.037
81.6	-41.1987	-30.8838	-22.3999	-13.2446	-2.92969	6.46973	16.9067	29.1748	44.4946	68.8477	101.013	-100.189	-80.1392	-60.0891	-40.0085	-19.989	-61.0352	20.0195	39.978	60.0891	80.0171	100.067
81.7	-41.1987	-30.8838	-22.3389	-13.2446	-2.86865	6.40869	16.8457	29.1748	44.4336	68.9697	101.074	-100.189	-80.0476	-60.0586	-40.0696	-19.989	30.5176	20.0195	40.0085	60.0281	80.0476	100.037
81.8	-41.2598	-30.8838	-22.2778	-13.2446	-2.80762	6.34766	16.7847	29.1748	44.4336	69.0308	101.196	-100.159	-80.0171	-60.1196	-40.0391	-19.989	-30.5176	20.0195	40.0085	60.1196	80.0171	100.098
81.9	-41.3208	-30.9448	-22.2168	-13.2446	-2.80762	6.28662	16.7847	29.1748	44.4336	69.0918	101.318	-100.128	-80.0781	-60.1196	-40.0391	-19.989	30.5176	20.05	40.0696	60.0586	80.0781	100.128
82	-41.4429	-31.0059	-22.2168	-13.2446	-2.80762	6.34766	16.8457	29.2358	44.4336	69.0918	101.44	-100.128	-80.1392	-60.1196	-40.0391	-20.0195	30.5176	20.0195	40.1001	60.0891	80.1086	100.067
82.1	-41.3818	-31.0669	-22.2778	-13.3057	-2.80762	6.40869	16.9067	29.2358	44.4946	69.0918	101.562	-100.128	-80.0476	-60.1196	-40.0696	-19.989	30.5176	19.9585	40.0391	59.9976	80.0476	100.098
82.2	-41.3208	-31.0669	-22.2168	-13.3667	-2.74658	6.40869	16.9067	29.2358	44.4946	69.0308	101.624	-100.189	-80.0781	-60.1196	-40.0391	-19.989	-30.5176	19.989	39.9475	60.0281	80.0171	100.037
82.3	-41.1377	-31.0059	-22.0947	-13.3667	-2.74658	6.46973	16.9067	29.2358	44.4946	69.0918	101.624	-100.159	-80.0476	-60.1196	-40.0696	-19.989	-30.5176	20.0195	40.0391	60.0891	80.0171	100.067
82.4	-41.0156	-30.8838	-22.0337	-13.3667	-2.74658	6.53076	16.8457	29.1748	44.5557	69.0308	101.562	-100.128	-80.0781	-60.1196	-40.0696	-20.0195	0	20.05	40.1001	60.0586	80.0171	100.098
82.5	-41.0156	-30.8228	-21.9116	-13.3667	-2.74658	6.53076	16.9067	29.1138	44.5557	69.0308	101.624	-100.128	-80.0781	-60.0891	-40.0696	-20.0195	0	20.0195	40.0391	60.0891	80.0476	100.037
82.6	-40.9546	-30.7007	-21.8506	-13.3667	-2.74658	6.53076	16.9678	29.1138	44.5557	68.9697	101.685	-100.098	-80.1086	-60.0891	-40.0391	-19.9585	0	19.9585	40.0391	60.0891	80.0476	100.098
82.7	-40.9546	-30.6396	-21.7895	-13.3667	-2.74658	6.53076	16.9678	29.1748	44.6777	68.8477	101.746	-100.159	-80.1086	-60.0586	-40.0696	-19.9585	0	19.989	40.0391	60.0586	80.0171	100.037
82.8	-40.9546	-30.6396	-21.6675	-13.3057	-2.80762	6.46973	16.9678	29.1748	44.7998	68.7866	101.746	-100.189	-80.0781	-60.1196	-40.0391	-19.989	30.5176	19.989	40.0391	59.9976	80.0476	100.037
82.9	-40.8936	-30.6396	-21.6064	-13.3667	-2.80762	6.46973	17.0288	29.2358	44.8608	68.7256	101.685	-100.128	-80.0476	-60.1501	-40.0696	-19.989	61.0352	20.05	40.0696	60.0586	80.0171	100.098
83	-40.8936	-30.7007	-21.5454	-13.3667	-2.86865	6.46973	17.0288	29.2358	44.9219	68.7256	101.562	-100.128	-80.0476	-60.0891	-40.0085	-20.0195	30.5176	20.0806	40.0696	60.0586	80.0781	100.067
83.1	-40.8936	-30.7007	-21.5454	-13.4888	-2.86865	6.40869	17.0898	29.2969	44.9219	68.7866	101.379	-100.159	-80.0171	-60.0586	-40.0696	-20.0195	30.5176	20.0806	40.1306	60.0891	80.0781	100.098
83.2	-40.8936	-30.7007	-21.5454	-13.6108	-2.80762	6.40869	17.0898	29.2969	44.9219	68.8477	101.257	-100.159	-80.0171	-60.0891	-40.1001	-20.0195	30.5176	20.0195	40.0391	60.0586	79.9866	100.067
83.3	-40.8936	-30.7007	-21.5454	-13.6719	-2.80762	6.40869	17.0288	29.3579	44.9219	68.9087	101.074	-100.189	-80.0476	-60.1501	-40.1001	-19.989	-30.5176	19.989	40.0085	60.0586	79.9561	100.037
83.4	-40.7715	-30.7617	-21.5454	-13.6719	-2.80762	6.40869	17.0288	29.4189	44.8608	68.9087	101.013	-100.159	-80.0476	-60.1501	-40.0391	-19.989	0	19.928	40.0085	60.0586	79.9866	100.037
83.5	-40.7104	-30.8228	-21.6064	-13.5498	-2.74658	6.40869	17.0288	29.4189	44.7998	68.8477	101.013	-100.128	-80.0781	-60.1196	-40.0391	-19.989	0	20.0195	40.0696	60.0891	80.0171	100.098
83.6	-40.5884	-30.8838	-21.6064	-13.4277	-2.74658	6.40869	17.0288	29.48	44.6777	68.7256	101.013	-100.128	-80.0781	-60.1196	-40.0085	-20.05	91.5527	20.1111	40.1001	60.0586	80.0781	100.128
83.7	-40.4663	-30.9448	-21.4844	-13.3667	-2.74658	6.40869	17.0288	29.541	44.5557	68.6645	101.074	-100.159	-80.0781	-60.0586	-39.978	-20.0195	61.0352	20.05	40.0391	60.0281	80.0781	100.067
83.8	-40.4053	-31.0059	-21.4844	-13.3667	-2.80762	6.40869	17.0288	29.602	44.4946	68.6645	101.074	-100.098	-80.0781	-60.0891	-40.0391	-19.9585	30.5176	19.989	40.0085	59.967	80.0171	100.037
83.9	-40.3442	-31.0669	-21.4233	-13.4888	-2.80762	6.40869	17.0898	29.6631	44.4336	68.6645	101.196	-100.22	-80.0476	-60.1196	-40.0696	-19.989	-30.5176	20.0195	39.978	60.0281	80.0171	100.037
84	-40.2832	-31.0059	-21.3013	-13.6719	-2.80762	6.46973	17.1509	29.6631	44.3726	68.7256	101.318	-100.22	-79.9866	-60.1196	-40.0391	-19.989	0	19.989	40.0391	60.0586	79.9866	100.067
84.1	-40.2222	-31.0059	-21.1792	-13.855	-2.74658	6.46973	17.2119	29.6631	44.4336	68.7866	101.379	-100.128	-80.0476	-60.0891	-40.0085	-20.0195	30.5176	19.989	40.1001	60.0586	80.0171	100.067
84.2	-40.2832	-30.9448	-21.1182	-13.977	-2.68555	6.53076	17.2119	29.602	44.4946	68.7866	101.318	-100.128	-80.1086	-60.0891	-40.1001	-20.0195	0	19.989	40.0696	60.0891	80.0476	100.037
84.3	-40.3442	-30.8838	-21.0571	-13.977	-2.68555	6.5918	17.2119	29.602	44.5557	68.7866	101.318	-100.159	-80.1392	-60.0586	-40.0696	-19.9585	30.5176	20.0195	40.1001	59.9976	80.0171	100.067
84.4	-40.3442	-30.8228	-21.1182	-13.916	-2.62451	6.5918	17.1509	29.602	44.4946	68.7256	101.379	-100.159	-80.0476	-60.1196	-40.0391	-19.989	0	19.9585	40.0391	59.967	79.9866	100.098
84.5	-40.3442	-30.7617	-21.2402	-13.855	-2.68555	6.53076	17.0898	29.602	44.4946	68.6035	101.44	-100.189	-80.0476	-60.1196	-40.1001	-19.9585	30.5176	19.989	40.0391	60.0281	80.0476	100.098
84.6	-40.4053	-30.7617	-21.3013	-13.855	-2.68555	6.40869	17.1509	29.541	44.4946	68.5425	101.501	-100.128	-80.0476	-60.1196	-40.0391	-19.989	30.5176	20.05	40.0085	60.0586	80.0781	100.098
84.7	-40.4053	-30.7617	-21.2402	-13.916	-2.68555	6.28662	17.1509	29.4189	44.5557	68.4814	101.562	-100.128	-80.0476	-60.0891	-40.0391	-20.0195	61.0352	20.05	40.0696	60.0891	80.0781	100.098
84.8	-40.4053	-30.7007	-21.1792	-13.977	-2.74658	6.22559	17.2119	29.3579	44.6167	68.5425	101.624	-100.159	-80.0781	-60.0586	-40.0391	-20.05	30.5176	19.989	40.0696	60.0586	80.0476	100.098
84.9	-40.4053	-30.7007	-21.1792	-14.0991	-2.74658	6.16455	17.2729	29.2969	44.6777	68.6645	101.624	-100.128	-80.0476	-60.0586	-40.0085	-20.0806	0	19.9585	40.0696	60.0281	79.9866	100.037
85	-40.3442	-30.7007	-21.1792	-14.1602	-2.74658	6.28662	17.334	29.2358	44.6167	68.7256	101.624	-100.189	-80.1086	-60.1196	-40.0085	-20.0195	0	19.928	40.0391	60.0281	80.0171	100.037
85.1	-40.3442	-30.6396	-21.1792	-14.2212	-2.74658	6.34766	17.395	29.2358	44.4946	68.7866	101.624	-100.159	-80.0781	-60.1501	-40.0391	-19.9585	0	19.989	39.978	60.0586	80.0171	100.098
85.2	-40.2832	-30.6396	-21.1792	-14.1602	-2.68555	6.40869	17.334	29.2358	44.3726	68.7866	101.562	-100.128	-80.0781	-60.1196	-40.0391	-19.989	30.5176	20.05	40.0085	60.0891	80.0781	100.098
85.3	-40.2222	-30.5786	-21.2402	-14.0991	-2.62451	6.46973	17.334	29.2358	44.3115	68.7866	101.501	-100.128	-80.0781	-60.0891	-40.0391	-20.05	30.5176	20.0195	40.1001	60.0586	80.0781	100.098
85.4	-40.1611	-30.6396	-21.3623	-14.0381	-2.62451	6.40869	17.2729	29.2358	44.3115	68.7256	101.501	-100.128	-80.0476	-60.1196	-40.0696	-19.989	0	20.0195	40.0696	60.0586	80.0476	100.128
85.5	-40.1611	-30.5786	-21.4844	-13.977	-2.62451	6.40869	17.2729	29.2358	44.3726	68.6645	101.562	-100.159	-80.1086	-60.1196	-40.0696	-19.989	30.5176	20.0195	40.0085	60.0281	80.0171	100.067
85.6	-40.1001	-30.5786	-21.5454	-13.977	-2.68555	6.40869	17.2729	29.2969	44.4336	68.6035	101.685	-100.159	-80.1086	-60.0891	-40.0391	-20.0806	0	19.989	40.0085	59.9976	80.0171	100.098
85.7	-40.1611	-30.5786	-21.5454	-13.977	-2.74658	6.40869	17.2729	29.3579	44.4336	68.6035	101.746	-100.22	-80.1086	-60.0891	-40.0085	-20.0195	-30.5176	19.9585	40.0085	60.1196	80.0171	100.037
85.8	-40.1001	-30.6396	-21.4844	-13.977	-2.80762	6.46973	17.2119	29.4189	44.4336	68.6645	101.807	-100.128	-80.0476	-60.0891	-40.0696	-19.989	-30.5176	20.0195	40.0696	60.0586	80.0781	100.067
85.9	-40.1001	-30.6396	-21.3623	-13.916	-2.80762	6.46973	17.2119	29.48	44.4336	68.6645	101.807	-100.037	-80.0781	-60.0891	-40.0085	-20.0195	30.5176	19.989	40.0696	60.0586	80.0476	100.098
86	-40.0391	-30.5786	-21.3013	-13.855	-2.86865	6.53076	17.2119	29.541	44.4336	68.7256	101.746	-100.128	-80.1392	-60.0891	-40.0696	-20.0195	0	19.9585	40.0696	60.0586	80.0171	100.098
86.1	-39.917	-30.4565	-21.2402	-13.7939	-2.86865	6.5918	17.2119	29.541	44.4336	68.7256	101.685	-100.098	-80.1392	-60.1196	-40.0391	-19.989	0	20.0195	40.0391	60.0586	80.0476	100.098
86.2	-39.978	-30.3955	-21.1182	-13.7329	-2.92969	6.65283	17.2119	29.541	44.4336	68.7256	101.562	-100.159	-80.0781	-60.0891	-40.0391	-20.0195	0	20.0195	40.0085	60.0586	80.0781	100.098
86.3	-39.978	-30.4565	-21.1182	-13.6719	-2.92969	6.71387	17.1509	29.541	44.3726	68.7256	101.562	-100.128	-80.1086	-60.1196	-40.0391	-19.989	0	19.989	40.0391	60.0586	80.0476	100.067
86.4	-39.978	-30.5786	-21.1792	-13.6108	-2.92969	6.71387	17.1509	29.48	44.3726	68.7256	101.562	-100.128	-80.0781	-60.1196	-40.1001	-20.0195	-30.5176	20.0195	40.0391	60.0586	80.0476	100.128
86.5	-40.0391	-30.7007	-21.2402	-13.6719	-2.80762	6.65283	17.2119	29.48	44.3726	68.6645	101.685	-100.128	-80.1086	-60.0586	-40.0696	-20.0806	-30.5176	20.0195	40.0391	60.0586	80.0476	100.067
86.6	-39.978	-30.7617	-21.2402	-13.7329	-2.74658	6.65283	17.334	29.48	44.3726	68.6035	101.807	-100.098	-80.1392	-60.1196	-40.0696	-20.0195	-30.5176	19.9585	40.0391	60.0586	80.0171	100.037
86.7	-39.978	-30.7617	-21.2402	-13.855	-2.80762	6.5918	17.4561	29.48	44.4336	68.6035	101.807	-100.128	-80.1392	-60.0586	-40.0391	-20.05	-30.5176	19.928	39.978	60.0586	79.9866	100.037
86.8	-39.917	-30.7007	-21.1792	-13.916	-2.86865	6.46973	17.5781	29.541	44.4336	68.6645	101.807	-100.159	-80.1392	-60.0891	-40.0391	-20.0195	-30.5176	19.989	40.0085	60.0586	80.0171	100.067
86.9	-39.856	-30.7007	-21.1182	-13.916	-2.86865	6.34766	17.5781	29.6631	44.4946	68.7256	101.746	-100.159	-80.1392	-60.1196	-40.0391	-19.989	0	19.9585	40.0696	60.0891	80.0781	100.128
87	-39.7949	-30.7007	-21.1182	-13.916	-2.92969	6.28662	17.5171	29.6631	44.6167	68.7256	101.746	-100.128	-80.1392	-60.0281	-40.0696	-20.0195	-30.5176	19.989	40.0696	60.0891	80.0476	100.098
87.1	-39.7949	-30.7007	-21.1182	-13.916	-2.86865	6.34766	17.4561	29.541	44.6777	68.7256	101.746	-100.159	-80.0476	-60.0891	-40.1001	-20.0195	0	19.989	40.0696	60.0281	80.0476	100.128
87.2	-39.7949	-30.7007	-21.1182	-13.916	-2.86865	6.40869	17.4561	29.4189	44.6167	68.7256	101.868	-100.128	-80.0781	-60.0891	-40.1306	-20.0195	-30.5176	20.0195	40.0696	60.0586	80.0171	100.067
87.3	-39.6728	-30.7617	-21.1792	-13.916	-2.86865	6.46973	17.395	29.4189	44.5557	68.6035	101.929	-100.159	-80.1392	-60.0586	-40.0696	-20.05	-30.5176	19.989	40.0085	60.0586	80.0476	100.067
87.4	-39.6118	-30.7617	-21.2402	-13.855	-2.86865	6.5918	17.395	29.4189	44.5557	68.5425	101.807	-100.189	-80.0781	-60.0586	-40.1306	-20.0195	0	19.928	39.978	60.0891	80.0171	100.037
87.5	-39.6118	-30.7007	-21.3013	-13.855	-2.86865	6.65283	17.395	29.48	44.5557	68.5425	101.624	-100.128	-80.1392	-60.0586	-40.0696	-20.0195	0	19.9585	40.0391	60.0891	80.0171	100.098
87.6	-39.6118	-30.7007	-21.3013	-13.855	-2.86865	6.5918	17.395	29.4189	44.6167	68.5425	101.44	-100.159	-80.0781	-60.0891	-40.0696	-20.0195	0	19.9585	40.0085	60.0586	80.0781	100.128
87.7	-39.6728	-30.7007	-21.3623	-13.855	-2.86865	6.5918	17.4561	29.4189	44.7388	68.6035	101.379	-100.128	-80.1086	-60.1196	-40.0696	-19.989	61.0352	19.989	40.0696	59.967	80.0781	100.098
87.8	-39.7949	-30.7617	-21.3623	-13.855	-2.86865	6.53076	17.4561	29.4189	44.7998	68.6035	101.318	-100.128	-80.0476	-60.0891	-40.0696	-19.989	0	20.05	40.0391	60.0281	80.0781	100.067
87.9	-39.856	-30.7617	-21.3623	-13.855	-2.92969	6.53076	17.395	29.3579	44.8608	68.5425	101.257	-100.128	-80.0781	-60.0891	-40.1001	-20.0195	61.0352	19.989	40.0085	60.0586	80.0476	100.037
88	-39.856	-30.7007	-21.3623	-13.855	-2.99072	6.53076	17.4561	29.4189	44.9219	68.5425	101.196	-100.189	-80.0171	-60.0891	-40.1001	-20.0195	0	20.0195	40.0085	60.0586	80.0476	100.037
88.1	-39.7949	-30.6396	-21.3623	-13.855	-3.05176	6.40869	17.4561	29.4189	44.8608	68.5425	101.074	-100.159	-80.0476	-60.0281	-40.0696	-20.05	0	19.9585	39.978	59.9976	80.0171	100.037
88.2	-39.7339	-30.6396	-21.3623	-13.855	-3.11279	6.40869	17.4561	29.4189	44.7998	68.6035	100.952	-100.159	-80.1086	-60.0891	-40.1001	-20.0806	-30.5176	19.9585	40.0391	60.0281	80.0171	100.067
88.3	-39.7339	-30.6396	-21.3623	-13.916	-3.17383	6.46973	17.4561	29.4189	44.7388	68.6035	100.891	-100.098	-80.1086	-59.9976	-40.0696	-20.0195	0	19.989	39.978	59.9976	80.0476	100.128
88.4	-39.7339	-30.5786	-21.3623	-13.916	-3.17383	6.53076	17.395	29.4189	44.7998	68.6035	100.83	-100.098	-80.0781	-60.0891	-40.0391	-20.0195	0	20.0195	40.0085	60.0281	80.0171	100.067
88.5	-39.7339	-30.5176	-21.3013	-13.977	-3.23486	6.53076	17.334	29.48	44.7998	68.5425	100.891	-100.098	-80.0781	-60.0586	-40.0696	-20.0195	-30.5176	19.9585	40.0085	60.0281	80.0781	100.067
88.6	-39.7339	-30.3955	-21.3013	-14.0381	-3.17383	6.53076	17.2729	29.541	44.9219	68.4814	100.952	-100.128	-80.1086	-60.0891	-40.0085	-20.05	30.5176	19.989	40.0391	60.0281	80.0476	100.098
88.7	-39.7949	-30.3955	-21.2402	-14.0381	-3.11279	6.53076	17.2729	29.541	45.0439	68.4204	101.074	-100.128	-80.1392	-60.0586	-40.0696	-20.0195	-30.5176	19.989	39.978	60.0281	80.0476	100.128
88.8	-39.7949	-30.3955	-21.1792	-13.977	-3.11279	6.53076	17.2729	29.541	45.105	68.4204	101.135	-100.098	-80.0781	-60.1196	-40.1001	-20.05	0	19.989	40.0085	60.0586	80.0171	100.128
88.9	-39.856	-30.3955	-21.1182	-13.916	-3.17383	6.46973	17.334	29.541	45.166	68.4204	101.196	-100.159	-80.0781	-60.0891	-40.1001	-19.989	-30.5176	20.0195	39.978	60.0281	80.0476	100.098
89	-39.856	-30.3955	-21.1182	-13.977	-3.23486	6.40869	17.395	29.48	45.105	68.5425	101.257	-100.159	-80.0781	-60.0891	-40.0391	-20.05	61.0352	19.989	40.0085	60.0891	80.0171	100.098
89.1	-39.7949	-30.3955	-21.1792	-13.977	-3.2959	6.34766	17.4561	29.48	45.105	68.5425	101.257	-100.128	-80.1086	-60.0281	-40.0391	-20.05	-30.5176	19.9585	39.978	60.0891	80.0171	100.098
89.2	-39.7339	-30.3345	-21.1792	-13.977	-3.2959	6.28662	17.5171	29.4189	45.0439	68.5425	101.257	-100.128	-80.1086	-60.1196	-40.0391	-20.05	0	19.928	40.0085	60.0891	80.1086	100.098
89.3	-39.6728	-30.3345	-21.1792	-13.977	-3.2959	6.22559	17.5171	29.4189	44.9829	68.5425	101.196	-100.067	-80.1392	-60.0586	-40.0391	-20.0195	-61.0352	19.9585	40.0085	60.0281	80.1392	100.128
89.4	-39.6118	-30.2734	-21.1792	-13.916	-3.23486	6.22559	17.5171	29.48	44.9829	68.5425	101.135	-100.037	-80.0781	-60.0586	-40.0696	-20.0195	30.5176	20.0195	40.0696	60.0281	80.1086	100.098
89.5	-39.6118	-30.2734	-21.1182	-13.916	-3.17383	6.22559	17.4561	29.602	45.0439	68.6035	101.074	-100.098	-80.1392	-60.0891	-40.0391	-20.05	61.0352	20.0806	40.0391	59.9976	80.0781	100.098
89.6	-39.6118	-30.2124	-21.0571	-13.916	-3.11279	6.22559	17.4561	29.7241	45.166	68.6035	101.135	-100.128	-80.1392	-60.0281	-40.1001	-20.0806	0	19.989	40.0391	60.0281	80.0476	100.128
89.7	-39.6118	-30.2124	-21.0571	-13.916	-3.11279	6.22559	17.4561	29.7852	45.2881	68.6645	101.257	-100.159	-80.1086	-60.0281	-40.0696	-20.0806	-30.5176	19.928	39.978	60.0586	80.0781	100.098
89.8	-39.6118	-30.2124	-20.9961	-13.977	-3.11279	6.28662	17.5171	29.7852	45.2881	68.6035	101.318	-100.128	-80.0781	-60.0891	-40.0696	-20.05	-30.5176	19.928	40.0085	60.0281	80.0476	100.128
89.9	-39.6118	-30.2124	-21.0571	-13.977	-3.17383	6.34766	17.5171	29.7241	45.227	68.6035	101.257	-100.098	-80.1392	-60.0586	-40.0696	-20.0195	-61.0352	19.928	40.0085	60.0281	80.0476	100.037
90	-39.6118	-30.1514	-21.0571	-14.0381	-3.2959	6.34766	17.5171	29.7241	45.105	68.6035	101.196	-100.067	-80.1392	-60.0586	-40.0696	-19.989	0	20.0195	40.0696	60.0891	80.0476	100.067
90.1	-39.6118	-30.1514	-21.1182	-14.0381	-3.35693	6.34766	17.5781	29.6631	44.9829	68.6035	101.074	-100.128	-80.1086	-60.0586	-40.0696	-20.0195	0	19.9585	40.0391	60.0586	80.1697	100.159
90.2	-39.6118	-30.2124	-21.2402	-14.0381	-3.2959	6.28662	17.6392	29.602	44.9219	68.6645	101.013	-100.128	-80.2002	-60.0586	-40.0391	-20.05	0	19.9585	40.0696	60.0281	80.0476	100.098
90.3	-39.5508	-30.2734	-21.3013	-13.977	-3.23486	6.22559	17.6392	29.48	44.9219	68.7256	100.891	-100.128	-80.0781	-60.0586	-40.0696	-20.0195	-30.5176	20.0195	40.0085	59.967	80.0781	100.128
90.4	-39.4897	-30.2734	-21.3623	-13.916	-3.17383	6.22559	17.6392	29.48	44.9219	68.7866	100.83	-100.128	-80.0476	-60.0891	-40.0391	-20.05	-61.0352	19.989	39.978	60.0281	80.0476	100.098
90.5	-39.4897	-30.2734	-21.3013	-13.916	-3.11279	6.28662	17.5781	29.3579	44.9219	68.7866	100.769	-100.098	-80.1086	-60.0586	-40.0696	-20.05	-61.0352	20.0195	40.0085	60.0586	80.0781	100.128
90.6	-39.4897	-30.2734	-21.2402	-13.916	-3.11279	6.34766	17.5171	29.2969	44.9829	68.7256	100.83	-100.098	-80.0781	-60.0281	-40.1001	-20.0195	-61.0352	19.989	40.0085	60.0586	80.0781	100.159
90.7	-39.4897	-30.3345	-21.1792	-13.977	-3.05176	6.40869	17.5171	29.2969	44.9829	68.6035	100.952	-100.128	-80.1697	-60.0586	-40.1001	-20.1111	30.5176	19.989	40.0391	60.0891	80.0781	100.098
90.8	-39.5508	-30.2734	-21.1182	-13.977	-3.05176	6.34766	17.5171	29.3579	45.0439	68.4814	101.074	-100.128	-80.1086	-60.0281	-40.0696	-20.05	-30.5176	19.9585	39.978	60.0891	80.0781	100.098
90.9	-39.6728	-30.2124	-21.1182	-13.977	-3.05176	6.28662	17.5171	29.3579	44.9829	68.4204	101.135	-100.128	-80.1086	-60.0891	-40.0391	-19.9585	-61.0352	19.928	39.9475	60.0586	80.0171	100.037
91	-39.7339	-30.1514	-21.1182	-13.916	-3.11279	6.28662	17.5171	29.3579	44.9219	68.4204	101.135	-100.098	-80.1392	-60.0586	-40.0085	-19.989	-30.5176	19.989	40.0085	60.0586	80.0476	100.098
91.1	-39.7339	-30.0903	-21.1792	-13.855	-3.17383	6.28662	17.5781	29.3579	44.9219	68.4814	101.196	-100.098	-80.1392	-60.0891	-40.1001	-20.0195	-30.5176	20.0195	40.1001	59.9976	80.0781	100.128
91.2	-39.6728	-30.0293	-21.2402	-13.7939	-3.23486	6.34766	17.5781	29.2969	44.8608	68.5425	101.196	-100.128	-80.1697	-60.0281	-40.0696	-20.1111	-30.5176	19.989	40.0391	60.0586	80.1086	100.159
91.3	-39.6728	-29.9683	-21.2402	-13.7939	-3.2959	6.40869	17.6392	29.2358	44.7998	68.6645	101.196	-100.159	-80.1392	-60.0586	-40.0696	-20.1111	-61.0352	19.9585	40.0391	60.0281	80.1392	100.159
91.4	-39.6728	-29.9683	-21.2402	-13.855	-3.35693	6.40869	17.6392	29.2969	44.7998	68.6645	101.318	-100.128	-80.0781	-60.0281	-40.1001	-20.05	0	19.928	40.0085	60.0281	80.0476	100.128
91.5	-39.7339	-30.0293	-21.2402	-13.916	-3.2959	6.40869	17.6392	29.2969	44.7388	68.6645	101.501	-100.128	-80.0476	-60.0586	-40.1611	-19.989	-91.5527	19.9585	39.978	60.0586	80.0171	100.067
91.6	-39.856	-30.0293	-21.3013	-13.916	-3.23486	6.34766	17.6392	29.3579	44.6777	68.6035	101.624	-100.067	-80.1392	-60.0586	-40.1001	-20.0195	-61.0352	19.9585	39.978	60.0586	80.0476	100.128
91.7	-39.978	-30.0293	-21.3623	-13.977	-3.17383	6.34766	17.5781	29.3579	44.6777	68.6035	101.685	-100.067	-80.2002	-60.0586	-40.0696	-20.05	-30.5176	19.9585	40.0391	60.0891	80.0476	100.128
91.8	-40.1001	-30.0293	-21.3013	-13.916	-3.17383	6.34766	17.5171	29.3579	44.6167	68.6035	101.685	-100.098	-80.1697	-60.0281	-40.1001	-20.05	30.5176	19.9585	40.0391	60.0281	80.1086	100.128
91.9	-40.1611	-29.9683	-21.3013	-13.916	-3.17383	6.34766	17.5171	29.3579	44.5557	68.7256	101.685	-100.098	-80.1086	-60.0586	-40.0696	-20.0806	-30.5176	19.9585	40.0391	60.0281	80.0781	100.098
92	-40.1611	-29.9683	-21.3623	-13.916	-3.17383	6.28662	17.4561	29.3579	44.5557	68.7866	101.562	-100.159	-80.1086	-60.0586	-40.0696	-20.05	-91.5527	19.989	40.0085	59.9976	80.0781	100.067
92.1	-40.1001	-29.9683	-21.3623	-13.977	-3.23486	6.22559	17.4561	29.3579	44.4946	68.8477	101.501	-100.159	-80.0781	-60.0891	-40.1001	-19.989	-91.5527	19.928	40.0085	60.0281	80.0476	100.128
92.2	-40.0391	-29.9072	-21.4233	-13.977	-3.23486	6.16455	17.395	29.3579	44.4336	68.9697	101.44	-100.128	-80.1392	-60.0281	-40.1001	-20.0195	-30.5176	19.9585	39.978	60.0586	80.0476	100.159
92.3	-39.978	-29.8462	-21.4233	-13.977	-3.2959	6.16455	17.4561	29.3579	44.3115	68.9697	101.379	-100.128	-80.1392	-60.0281	-40.1306	-20.0806	-30.5176	19.9585	40.0391	60.0891	80.0476	100.128
92.4	-39.917	-29.9072	-21.4233	-13.977	-3.2959	6.22559	17.5171	29.4189	44.2505	68.9697	101.196	-100.098	-80.1086	-60.0281	-40.1306	-20.0806	0	19.928	39.978	60.1196	80.1086	100.098
92.5	-39.917	-29.9683	-21.4844	-13.855	-3.35693	6.28662	17.5171	29.48	44.1895	68.9697	101.013	-100.098	-80.1086	-60.0891	-40.0696	-20.0806	0	19.9585	39.9475	60.0281	80.0476	100.098
92.6	-39.978	-30.0293	-21.5454	-13.7329	-3.35693	6.34766	17.5781	29.541	44.2505	68.9697	100.769	-100.128	-80.1086	-60.0891	-40.0696	-20.0195	-30.5176	19.928	40.0085	59.9976	80.0476	100.098
92.7	-40.0391	-30.1514	-21.6064	-13.7329	-3.41797	6.40869	17.5781	29.602	44.3115	68.9697	100.586	-100.098	-80.0781	-60.0586	-40.0391	-19.989	-30.5176	20.0195	39.9475	59.9976	80.1086	100.098
92.8	-40.0391	-30.1514	-21.6064	-13.6719	-3.35693	6.46973	17.5781	29.541	44.3726	68.9697	100.525	-100.098	-80.1086	-60.0281	-40.1001	-20.05	30.5176	20.0195	39.978	60.0281	80.1392	100.098
92.9	-40.0391	-30.1514	-21.6064	-13.6108	-3.2959	6.46973	17.5171	29.541	44.4946	68.9697	100.586	-100.159	-80.0781	-60.0586	-40.0696	-20.1111	-30.5176	20.0195	39.978	59.9976	80.1086	100.128
93	-40.0391	-30.0903	-21.6064	-13.5498	-3.35693	6.40869	17.4561	29.541	44.4946	68.9697	100.708	-100.159	-80.0781	-60.0891	-40.0696	-20.0806	-30.5176	19.9585	39.978	60.0281	80.0781	100.037
93.1	-39.978	-30.0293	-21.5454	-13.5498	-3.479	6.40869	17.4561	29.541	44.5557	68.9697	100.83	-100.159	-80.1392	-60.0281	-40.0085	-20.0195	-61.0352	19.928	39.917	60.0281	80.0476	100.098
93.2	-39.978	-29.9683	-21.5454	-13.5498	-3.54004	6.40869	17.5171	29.602	44.5557	68.9697	100.952	-100.159	-80.0476	-60.0586	-40.0391	-20.0195	-61.0352	19.9585	39.9475	60.0281	80.0171	100.098
93.3	-39.978	-29.9072	-21.5454	-13.6108	-3.60107	6.40869	17.5171	29.602	44.6167	68.9697	101.135	-100.128	-80.1697	-60.0891	-40.0696	-20.0195	0	20.0195	39.9475	60.0281	80.0476	100.159
93.4	-40.0391	-29.9683	-21.5454	-13.7329	-3.54004	6.34766	17.5171	29.6631	44.6167	69.0308	101.196	-100.098	-80.1697	-60.0891	-40.0696	-20.0195	61.0352	19.989	40.0391	60.0586	80.1086	100.128
93.5	-40.0391	-30.0293	-21.5454	-13.7939	-3.54004	6.34766	17.4561	29.602	44.6777	69.0308	101.318	-100.128	-80.0781	-60.0586	-40.0696	-20.0806	0	19.989	40.0391	60.0281	80.1697	100.128
93.6	-39.917	-30.0903	-21.5454	-13.7939	-3.479	6.34766	17.395	29.602	44.7998	69.0308	101.257	-100.159	-80.0476	-60.0891	-40.0391	-20.0806	30.5176	19.928	40.0391	59.9976	80.1392	100.128
93.7	-39.7949	-30.1514	-21.6064	-13.7939	-3.54004	6.34766	17.334	29.602	44.9219	69.0308	101.135	-100.159	-80.0476	-60.1196	-40.1306	-20.05	-30.5176	19.9585	39.978	59.9976	80.0781	100.128
93.8	-39.6118	-30.1514	-21.6064	-13.7329	-3.54004	6.40869	17.395	29.602	44.9829	68.9697	101.074	-100.098	-80.1086	-60.0586	-40.0696	-19.989	-30.5176	19.9585	40.0085	59.9976	80.0476	100.098
93.9	-39.5508	-30.1514	-21.6064	-13.7329	-3.60107	6.40869	17.395	29.602	45.0439	68.9697	101.013	-100.128	-80.0781	-60.0281	-40.0696	-20.0195	-91.5527	19.9585	39.978	60.0586	80.0781	100.189
94	-39.5508	-30.1514	-21.5454	-13.7329	-3.66211	6.34766	17.4561	29.6631	45.0439	68.9087	101.074	-100.098	-80.1086	-60.0586	-40.0696	-20.05	0	19.9585	39.978	60.1196	80.1086	100.159
94.1	-39.5508	-30.1514	-21.6064	-13.7329	-3.78418	6.34766	17.4561	29.7241	45.0439	68.8477	101.135	-100.098	-80.1697	-60.0281	-40.1306	-20.0806	0	19.989	40.0085	60.0891	80.0781	100.098
94.2	-39.5508	-30.0903	-21.6064	-13.6719	-3.84521	6.40869	17.4561	29.7241	44.9829	68.7866	101.135	-100.159	-80.1392	-60.0891	-40.0391	-20.0195	0	19.9585	40.0085	60.0281	80.0781	100.098
94.3	-39.5508	-30.0293	-21.6064	-13.6108	-3.84521	6.40869	17.4561	29.6631	44.9829	68.6645	101.196	-100.098	-80.1086	-60.0586	-40.0696	-20.0195	-30.5176	19.9585	40.0085	59.967	80.0781	100.067
94.4	-39.5508	-29.9072	-21.6064	-13.6108	-3.78418	6.40869	17.334	29.602	44.9829	68.6035	101.257	-100.098	-80.1392	-60.0891	-40.0391	-19.989	-30.5176	20.05	40.0085	59.9976	80.0476	100.098
94.5	-39.5508	-29.8462	-21.6064	-13.6108	-3.72314	6.28662	17.334	29.602	44.9219	68.5425	101.318	-100.128	-80.0781	-60.0586	-40.0391	-19.989	-30.5176	20.0195	40.0085	60.0281	80.0781	100.128
94.6	-39.6118	-29.8462	-21.6675	-13.6108	-3.72314	6.22559	17.395	29.541	44.9219	68.4814	101.257	-100.098	-80.0781	-60.0891	-40.1001	-20.1111	0	20.05	40.0391	60.0586	80.0781	100.159
94.7	-39.6118	-29.9072	-21.7285	-13.6108	-3.66211	6.22559	17.4561	29.48	44.8608	68.4814	101.196	-100.128	-80.1086	-60.0586	-40.0696	-20.05	0	19.9585	40.0391	60.1196	80.0476	100.128
94.8	-39.5508	-29.7241	-21.7895	-13.6719	-3.72314	6.28662	17.5171	29.48	44.8608	68.5425	101.074	-100.037	-80.1086	-60.0586	-40.0391	-19.989	0	19.989	40.0085	60.0891	80.0476	100.159
94.9	-39.4287	-29.541	-21.7895	-13.7939	-3.72314	6.40869	17.5171	29.541	44.8608	68.6035	101.013	-100.098	-80.1697	-60.0891	-40.1001	-20.0806	-61.0352	19.9585	40.0085	60.0586	80.0476	100.098
95	-39.3677	-29.4189	-21.7895	-13.7939	-3.78418	6.40869	17.4561	29.541	44.8608	68.6645	101.013	-100.098	-80.1086	-60.0891	-40.0696	-19.989	-30.5176	19.9585	40.0085	60.0281	80.0781	100.128
95.1	-39.2456	-29.2969	-21.7895	-13.7939	-3.78418	6.34766	17.4561	29.602	44.8608	68.6035	101.013	-100.128	-80.1086	-60.1196	-40.0391	-19.989	0	20.0195	40.0696	60.0281	80.1086	100.128
95.2	-39.1846	-29.2969	-21.8506	-13.7329	-3.72314	6.28662	17.395	29.602	44.9219	68.4814	101.135	-100.128	-80.0781	-60.0586	-40.1001	-20.0195	-30.5176	20.0195	40.0391	60.0281	80.0781	100.128
95.3	-39.1846	-29.2969	-21.9116	-13.7329	-3.66211	6.28662	17.334	29.602	44.9219	68.4204	101.257	-100.098	-80.1392	-60.1196	-40.0696	-20.0195	30.5176	20.05	40.0085	60.0586	80.0781	100.098
95.4	-39.1846	-29.3579	-21.9727	-13.7939	-3.66211	6.40869	17.395	29.541	44.9219	68.4204	101.379	-100.159	-80.1086	-60.0586	-40.0391	-20.0806	0	19.989	39.9475	60.0586	80.0171	100.159
95.5	-39.2456	-29.4189	-22.0337	-13.7939	-3.60107	6.46973	17.4561	29.541	44.7998	68.4204	101.501	-100.128	-80.0781	-60.0891	-40.1001	-20.0195	-30.5176	19.9585	39.978	60.0891	80.0476	100.098
95.6	-39.3677	-29.48	-21.9727	-13.7939	-3.66211	6.53076	17.4561	29.602	44.6777	68.4814	101.44	-100.128	-80.0781	-60.0891	-40.1001	-20.0195	0	19.989	40.0696	60.1196	80.0171	100.067
95.7	-39.3677	-29.541	-21.9727	-13.855	-3.66211	6.53076	17.5171	29.602	44.6167	68.4814	101.318	-100.098	-80.0781	-60.0891	-40.1001	-20.0195	-30.5176	19.928	40.0391	60.0281	80.0476	100.128
95.8	-39.3677	-29.602	-21.9727	-13.855	-3.72314	6.53076	17.5171	29.602	44.6167	68.6035	101.135	-100.067	-80.0781	-60.0891	-40.0696	-20.0195	0	20.0195	40.0391	60.0586	80.1392	100.098
95.9	-39.4287	-29.6631	-22.0337	-13.916	-3.78418	6.40869	17.5781	29.602	44.7388	68.7866	101.074	-100.128	-80.1086	-60.0891	-40.1001	-20.0806	30.5176	19.989	40.0696	60.0586	80.0476	100.098
96	-39.4287	-29.6631	-22.0947	-13.855	-3.78418	6.34766	17.5781	29.602	44.8608	68.8477	101.135	-100.159	-80.1392	-60.0586	-40.0391	-20.0195	0	19.989	40.0085	60.0281	80.0781	100.098
96.1	-39.4897	-29.7241	-22.1558	-13.7939	-3.78418	6.22559	17.5171	29.541	44.9219	68.9087	101.257	-100.159	-80.1086	-60.0281	-40.1001	-20.0806	0	20.0195	40.0085	60.0281	80.0781	100.037
96.2	-39.4287	-29.7241	-22.2168	-13.7329	-3.72314	6.22559	17.4561	29.48	44.9219	68.9697	101.257	-100.159	-80.0781	-60.0586	-40.0085	-20.0195	0	19.989	40.0085	60.0281	80.0476	100.128
96.3	-39.4287	-29.7241	-22.2168	-13.7939	-3.72314	6.22559	17.4561	29.48	44.9219	68.9087	101.196	-100.128	-80.0476	-60.0281	-40.0391	-20.0195	-30.5176	19.989	40.0085	60.0281	80.0476	100.067
96.4	-39.3677	-29.7852	-22.2168	-13.7329	-3.78418	6.22559	17.4561	29.48	44.9219	68.9087	101.013	-100.159	-80.0781	-60.0586	-40.0391	-20.0195	-30.5176	19.989	40.0696	60.0281	80.0171	100.098
96.5	-39.3677	-29.7852	-22.1558	-13.7329	-3.78418	6.28662	17.5171	29.48	44.8608	68.9087	100.891	-100.128	-80.0781	-60.0586	-40.0696	-20.0195	61.0352	20.0195	40.0391	60.0281	80.0171	100.067
96.6	-39.3066	-29.7241	-22.1558	-13.6719	-3.84521	6.34766	17.5781	29.48	44.7998	69.0308	100.83	-100.159	-80.1086	-60.0891	-40.0391	-20.05	30.5176	20.0195	40.0391	60.0891	80.0476	100.098
96.7	-39.3066	-29.6631	-22.1558	-13.6108	-3.84521	6.34766	17.7002	29.4189	44.7998	69.0918	100.891	-100.098	-80.0781	-60.0891	-40.0696	-19.989	0	20.0195	39.978	60.0586	80.0781	100.098
96.8	-39.3066	-29.7241	-22.2168	-13.6108	-3.84521	6.34766	17.7002	29.4189	44.7998	69.2139	101.013	-100.159	-80.1086	-60.0891	-40.0085	-20.0195	30.5176	20.0195	40.0391	60.0586	80.0781	100.067
96.9	-39.3066	-29.7852	-22.2168	-13.6108	-3.90625	6.34766	17.7612	29.3579	44.7998	69.2749	101.074	-100.159	-80.0781	-60.0586	-40.0085	-20.0195	-30.5176	19.989	40.0391	59.9976	80.0476	100.098
97	-39.2456	-29.9072	-22.1558	-13.6719	-3.90625	6.34766	17.8223	29.3579	44.7998	69.2749	101.013	-100.159	-80.1086	-60.0891	-40.0696	-20.0195	-30.5176	20.05	40.0085	60.0281	80.0476	100.067
97.1	-39.2456	-29.9683	-22.0947	-13.6719	-3.96728	6.34766	17.8223	29.2969	44.7388	69.3359	101.013	-100.128	-80.1086	-60.1196	-40.0391	-20.0195	0	19.989	39.978	60.0281	80.0171	100.067
97.2	-39.1846	-29.9683	-22.1558	-13.6108	-4.02832	6.34766	17.8223	29.2969	44.6167	69.397	101.013	-100.189	-80.0781	-60.0586	-40.0085	-20.05	-30.5176	19.989	39.978	60.0586	80.0171	100.098
97.3	-39.1846	-29.9072	-22.1558	-13.6108	-4.08936	6.40869	17.8833	29.2969	44.5557	69.3359	101.013	-100.098	-80.0781	-60.1501	-40.0391	-20.0195	-30.5176	19.928	40.0085	60.0281	80.0171	100.098
97.4	-39.2456	-29.8462	-22.0947	-13.6108	-4.15039	6.40869	17.9443	29.4189	44.5557	69.2749	101.013	-100.159	-80.1392	-60.1196	-40.0696	-20.0195	-30.5176	19.9585	40.0391	60.0281	80.0171	100.098
97.5	-39.2456	-29.8462	-22.0947	-13.6719	-4.21143	6.40869	17.9443	29.48	44.4946	69.1528	100.891	-100.159	-80.1086	-60.1196	-40.0391	-19.9585	-61.0352	19.989	40.0085	60.0281	80.0476	100.067
97.6	-39.3677	-29.9072	-22.0337	-13.6108	-4.21143	6.40869	17.9443	29.541	44.4336	69.0918	100.891	-100.128	-80.1392	-60.1196	-39.9475	-19.9585	61.0352	19.989	40.0391	60.0891	80.0781	100.098
97.7	-39.4897	-29.9072	-22.0947	-13.6719	-4.21143	6.40869	17.9443	29.541	44.3726	69.0308	101.013	-100.189	-80.0476	-60.1501	-40.1001	-20.0195	0	19.9585	40.0085	60.0586	80.0476	100.159
97.8	-39.4897	-29.9072	-22.1558	-13.7329	-4.15039	6.40869	17.9443	29.48	44.3115	68.9697	101.135	-100.22	-80.0476	-60.0891	-39.978	-20.0806	91.5527	20.0195	39.978	60.0891	80.0781	100.067
97.9	-39.4287	-29.8462	-22.1558	-13.7939	-4.02832	6.34766	18.0054	29.4189	44.3726	68.9697	101.257	-100.189	-80.0171	-60.0891	-40.0391	-20.0806	-61.0352	19.928	39.978	60.0281	80.0476	100.159
98	-39.4287	-29.7852	-22.0947	-13.7939	-3.90625	6.34766	18.0054	29.3579	44.4336	68.9697	101.318	-100.128	-80.0171	-60.0891	-40.0391	-20.0195	0	19.9585	40.0085	60.0281	80.0476	100.128
98.1	-39.4287	-29.7241	-22.0337	-13.6719	-3.84521	6.28662	18.0054	29.3579	44.4336	68.9697	101.318	-100.128	-80.0476	-60.1196	-40.0696	-20.0195	0	19.9585	40.0391	60.0281	80.0171	100.067
98.2	-39.4287	-29.7241	-22.0337	-13.5498	-3.84521	6.28662	17.9443	29.3579	44.4336	68.9697	101.257	-100.128	-80.0781	-60.1196	-40.0391	-20.05	30.5176	19.989	40.0696	60.0891	80.0476	100.128
98.3	-39.4287	-29.6631	-22.0337	-13.4888	-3.90625	6.28662	18.0054	29.4189	44.4336	68.9697	101.196	-100.128	-80.0781	-60.1501	-39.978	-19.989	61.0352	19.989	40.0391	60.0586	80.0476	100.098
98.4	-39.3677	-29.6631	-21.9727	-13.4888	-3.90625	6.40869	18.0054	29.4189	44.4336	68.9697	101.196	-100.128	-80.0781	-60.1196	-40.0085	-20.05	30.5176	19.928	40.0391	60.0586	80.1086	100.067
98.5	-39.2456	-29.6631	-21.9116	-13.6108	-3.96728	6.46973	17.9443	29.48	44.3726	68.9697	101.196	-100.22	-80.0476	-60.1196	-40.0391	-19.989	0	19.9585	40.0391	60.0281	80.0171	100.098
98.6	-39.2456	-29.602	-21.9116	-13.6719	-3.96728	6.53076	17.9443	29.48	44.2505	69.0308	101.196	-100.128	-80.0781	-60.0891	-40.0085	-19.989	0	19.989	40.0391	60.0281	80.0171	100.037
98.7	-39.3066	-29.48	-21.8506	-13.7329	-4.02832	6.53076	18.0054	29.541	44.1895	69.0308	101.135	-100.098	-80.0781	-60.0891	-40.0085	-19.989	30.5176	19.989	40.0696	60.0891	80.0781	100.098
98.8	-39.4287	-29.4189	-21.9116	-13.7939	-4.15039	6.46973	18.0664	29.541	44.1284	69.0918	101.135	-100.159	-80.0781	-60.0891	-39.978	-20.0806	30.5176	20.0195	39.978	60.1501	80.0171	100.128
98.9	-39.4897	-29.4189	-21.9727	-13.916	-4.15039	6.46973	18.0664	29.541	44.0674	69.1528	101.135	-100.159	-80.0781	-60.1196	-40.0696	-20.0806	0	19.9585	40.0391	60.0891	80.0781	100.098
99	-39.6118	-29.541	-22.0337	-13.916	-4.21143	6.40869	18.0664	29.541	44.0063	69.2139	101.074	-100.159	-80.0781	-60.1196	-40.1001	-20.05	0	19.9585	40.0696	60.0586	80.0476	100.128
99.1	-39.7339	-29.602	-22.0337	-13.916	-4.21143	6.34766	18.1274	29.541	43.8843	69.2139	101.074	-100.098	-80.1086	-60.1196	-40.0085	-19.989	-30.5176	19.9585	40.0391	60.0281	79.9866	100.067
99.2	-39.7339	-29.6631	-21.9727	-13.916	-4.27246	6.28662	18.1274	29.541	43.8232	69.2139	101.074	-100.128	-80.0781	-60.1196	-40.0085	-20.0195	0	20.0195	40.0391	60.0586	79.9866	100.067
99.3	-39.7949	-29.6631	-21.9116	-13.855	-4.27246	6.22559	18.1274	29.602	43.7012	69.2139	101.013	-100.159	-80.0781	-60.0891	-40.0085	-19.989	30.5176	20.0806	40.0696	60.0891	80.0476	100.098
99.4	-39.7949	-29.6631	-21.9116	-13.855	-4.21143	6.22559	18.1274	29.602	43.7012	69.1528	101.013	-100.189	-80.0476	-60.1501	-40.0391	-20.0195	61.0352	20.0195	40.1001	60.0891	80.0476	100.128
99.5	-39.7949	-29.6631	-21.9727	-13.855	-4.21143	6.16455	18.1274	29.602	43.7622	69.0918	101.074	-100.159	-80.0476	-60.0891	-40.0085	-20.0806	30.5176	19.989	40.0085	60.0891	80.0171	100.128
99.6	-39.856	-29.7241	-22.0337	-13.916	-4.27246	6.16455	18.0664	29.602	43.7622	69.0308	101.135	-100.128	-80.0476	-60.0891	-40.0085	-20.05	-30.5176	19.9585	39.978	60.0891	80.0171	100.098
99.7	-39.856	-29.7852	-22.0947	-13.977	-4.3335	6.16455	18.0664	29.602	43.7622	68.8477	101.257	-100.098	-80.0476	-60.0891	-40.0391	-19.9585	-61.0352	19.9585	40.0391	60.0891	79.9561	100.037
99.8	-39.856	-29.9072	-22.0947	-13.977	-4.39453	6.16455	18.0664	29.602	43.8232	68.7256	101.379	-100.098	-80.0781	-60.1196	-40.0696	-19.989	30.5176	20.0195	40.0391	60.1196	79.9866	100.098
99.9	-39.856	-29.9072	-22.0337	-13.977	-4.39453	6.10352	18.0664	29.602	43.9453	68.6035	101.562	-100.189	-80.0476	-60.1501	-40.0391	-20.0806	30.5176	19.989	40.0391	60.0891	80.0476	100.098
100	-39.856	-29.9683	-22.0337	-13.916	-4.45557	6.04248	18.0664	29.6631	44.0063	68.6035	101.624	-100.189	-80.0476	-60.1196	-40.0391	-20.05	30.5176	19.989	40.0696	60.0586	80.0171	100.098
100.1	-39.856	-29.9683	-22.0337	-13.916	-4.45557	6.04248	17.9443	29.6631	44.1284	68.6645	101.562	-100.189	-80.0781	-60.1196	-40.0391	-19.9585	0	20.0195	40.0391	60.0281	80.0781	100.098
100.2	-39.856	-30.0293	-22.0337	-13.916	-4.45557	6.04248	17.9443	29.7852	44.1895	68.6645	101.501	-100.159	-80.0781	-60.0891	-39.978	-19.989	0	20.05	39.978	60.0586	79.9866	100.098
100.3	-39.7949	-30.0903	-22.0947	-13.855	-4.45557	6.16455	17.9443	29.8462	44.1895	68.6645	101.379	-100.189	-80.0781	-60.0586	-40.0696	-19.9585	0	19.9585	40.0696	60.0891	79.9866	100.098
100.4	-39.7949	-30.2124	-22.0337	-13.855	-4.45557	6.22559	18.0664	29.8462	44.1895	68.6645	101.257	-100.159	-80.0781	-60.0586	-40.0696	-20.0195	30.5176	20.0195	40.0696	60.1196	80.0476	100.159
100.5	-39.7949	-30.2734	-22.0337	-13.7939	-4.39453	6.22559	18.1274	29.8462	44.2505	68.6645	101.196	-100.098	-80.0781	-60.1196	-40.0696	-20.0195	30.5176	19.989	40.0696	60.0891	80.0171	100.128
100.6	-39.7949	-30.2734	-22.0337	-13.7329	-4.3335	6.28662	18.1274	29.7852	44.3115	68.7256	101.196	-100.128	-80.0781	-60.1196	-40.0696	-20.0195	-30.5176	19.9585	40.0696	60.0891	80.1392	100.067
100.7	-39.7949	-30.2124	-21.9727	-13.6719	-4.3335	6.28662	18.1274	29.7241	44.3115	68.7866	101.196	-100.159	-80.0781	-60.1196	-40.0391	-20.0195	-30.5176	19.9585	40.0085	60.0281	80.0476	100.006
100.8	-39.7339	-30.1514	-22.0337	-13.6719	-4.3335	6.28662	18.1274	29.7241	44.2505	68.8477	101.196	-100.159	-80.0781	-60.1196	-39.9475	-19.989	-30.5176	20.0195	39.978	60.0586	80.0476	100.037
100.9	-39.6728	-30.1514	-22.0947	-13.6108	-4.27246	6.28662	18.1885	29.6631	44.1895	68.9087	101.196	-100.159	-80.1086	-60.0891	-40.0085	-19.928	0	20.0195	40.0391	60.0281	80.0171	100.098
101	-39.6728	-30.1514	-22.0947	-13.6108	-4.27246	6.28662	18.1885	29.7241	44.1284	68.9697	101.135	-100.159	-80.0476	-60.0891	-40.0391	-19.989	61.0352	20.05	40.1001	60.0586	80.0476	100.128
101.1	-39.6728	-30.1514	-22.1558	-13.5498	-4.21143	6.34766	18.1885	29.7241	44.0674	69.0918	101.135	-100.189	-80.0476	-60.1196	-40.0696	-20.0195	61.0352	19.989	40.0391	60.0891	80.0476	100.098
101.2	-39.6728	-30.1514	-22.1558	-13.5498	-4.27246	6.22559	18.1274	29.7852	44.0674	69.0918	101.074	-100.22	-80.0476	-60.1501	-40.0085	-20.05	0	19.9585	40.0085	60.0586	80.0171	100.067
101.3	-39.6728	-30.1514	-22.1558	-13.5498	-4.3335	6.16455	18.1274	29.8462	44.1284	69.1528	101.074	-100.159	-80.0781	-60.0891	-40.0391	-20.05	0	19.9585	39.978	60.0586	79.9866	100.037
101.4	-39.6118	-30.1514	-22.0947	-13.6719	-4.3335	6.10352	18.1274	29.9072	44.1284	69.2139	101.013	-100.159	-80.1086	-60.0586	-40.0391	-20.0195	-30.5176	19.989	40.0085	60.0586	79.9866	100.037
101.5	-39.6728	-30.2124	-22.0947	-13.6719	-4.3335	6.04248	18.1274	29.9683	44.1895	69.2749	100.952	-100.159	-80.0781	-60.0891	-40.0391	-20.0195	-30.5176	19.989	39.978	60.0891	80.0171	100.067
101.6	-39.6728	-30.2734	-22.0337	-13.7329	-4.27246	5.98144	18.1885	29.9683	44.1895	69.2749	100.891	-100.22	-80.1086	-60.0891	-40.0696	-20.05	0	19.989	40.0696	60.0891	80.0476	100.098
101.7	-39.7339	-30.2734	-21.9727	-13.7329	-4.27246	5.98144	18.1274	29.9683	44.2505	69.2749	100.83	-100.159	-80.0781	-60.1196	-40.0391	-20.05	61.0352	20.0195	40.0696	60.0586	80.0781	100.067
101.8	-39.7949	-30.2124	-21.9727	-13.6719	-4.3335	5.98144	18.1274	30.0293	44.3115	69.2139	100.83	-100.189	-80.0476	-60.0891	-40.0085	-20.0195	30.5176	19.9585	40.0391	60.0281	80.0171	100.037
101.9	-39.856	-30.1514	-21.9727	-13.6719	-4.39453	6.04248	18.1274	30.0293	44.3115	69.1528	100.83	-100.189	-80.0476	-60.1196	-40.0085	-19.9585	0	19.989	40.0391	60.0281	79.9561	100.037
102	-39.856	-30.1514	-22.0337	-13.6719	-4.45557	6.04248	18.1274	30.0903	44.3115	69.0308	100.891	-100.128	-80.0781	-60.0891	-40.0391	-19.9585	0	20.05	40.0391	59.9976	79.9561	100.037
102.1	-39.856	-30.1514	-22.0337	-13.6719	-4.45557	6.04248	18.0664	30.0293	44.2505	68.9697	101.013	-100.128	-80.1392	-60.0586	-40.0085	-20.0195	30.5176	20.0195	40.0085	60.1196	80.0171	100.159
102.2	-39.856	-30.2734	-22.0337	-13.7329	-4.39453	6.04248	18.0054	30.0293	44.2505	68.9697	101.074	-100.159	-80.0781	-60.0586	-40.0391	-20.0806	30.5176	19.9585	39.978	60.1501	80.0781	100.159
102.3	-39.856	-30.2734	-22.0337	-13.7329	-4.39453	6.10352	18.0054	29.9683	44.2505	68.9697	101.135	-100.159	-80.1086	-60.0891	-40.0391	-20.0195	0	19.989	40.0696	60.0281	80.0781	100.128
102.4	-39.856	-30.2734	-22.0337	-13.7329	-4.39453	6.10352	18.0054	29.9683	44.3726	69.0308	101.135	-100.159	-80.1697	-60.0891	-40.0391	-19.989	0	19.9585	40.1001	60.0586	80.0476	100.067
102.5	-39.856	-30.2734	-22.1558	-13.6719	-4.39453	6.04248	18.0054	29.9683	44.4946	69.1528	101.074	-100.159	-80.1086	-60.0586	-40.0391	-19.989	0	19.989	40.0085	60.0281	79.9866	100.037
102.6	-39.7949	-30.2734	-22.2778	-13.7329	-4.39453	6.10352	17.9443	29.9683	44.5557	69.2749	100.952	-100.128	-80.1392	-60.1196	-40.0085	-20.0195	0	20.0195	40.0391	60.0281	79.9866	100.128
102.7	-39.6118	-30.2734	-22.3389	-13.7939	-4.39453	6.10352	18.0054	29.9683	44.5557	69.3359	100.891	-100.189	-80.1392	-60.0891	-40.0391	-20.05	0	19.989	40.0391	60.0891	80.0171	100.159
102.8	-39.6118	-30.2124	-22.3999	-13.855	-4.39453	6.16455	18.0664	30.0293	44.5557	69.2749	100.83	-100.128	-80.0781	-60.0891	-40.0391	-20.05	30.5176	19.989	39.978	60.0891	80.0171	100.128
102.9	-39.6118	-30.2124	-22.3389	-13.855	-4.45557	6.16455	18.1274	30.0903	44.4946	69.1528	100.83	-100.128	-80.1086	-60.1196	-40.0085	-20.0806	-30.5176	19.928	39.978	60.0891	80.0781	100.098
103	-39.6728	-30.3345	-22.2778	-13.7329	-4.45557	6.16455	18.1885	30.2124	44.4336	69.0918	100.769	-100.098	-80.0781	-60.0586	-40.0391	-20.0806	-30.5176	19.9585	40.0085	60.0586	80.0781	100.098
103.1	-39.7339	-30.4565	-22.2168	-13.6719	-4.39453	6.16455	18.1885	30.2734	44.3726	68.9697	100.708	-100.067	-80.0781	-60.0891	-40.0696	-20.0195	-30.5176	19.9585	40.0085	60.0281	80.0171	100.037
103.2	-39.7339	-30.5176	-22.1558	-13.7329	-4.3335	6.16455	18.2495	30.2734	44.3726	68.9087	100.708	-100.098	-80.1697	-60.1196	-40.1001	-19.9585	-30.5176	19.989	40.0085	60.0586	80.0171	100.037
103.3	-39.7339	-30.5176	-22.0947	-13.855	-4.3335	6.22559	18.2495	30.3345	44.3726	68.8477	100.647	-100.128	-80.1086	-60.0891	-40.0391	-20.0195	0	20.05	40.0696	60.0586	80.0476	100.098
103.4	-39.7949	-30.5176	-22.0947	-13.916	-4.45557	6.16455	18.3716	30.3345	44.3115	68.8477	100.708	-100.128	-80.1392	-60.0586	-40.0085	-20.0806	30.5176	20.0195	40.0696	60.0586	80.0781	100.098
103.5	-39.856	-30.4565	-22.1558	-13.916	-4.5166	6.04248	18.3716	30.5176	44.2505	68.7866	100.708	-100.159	-80.1392	-60.1196	-40.0391	-20.05	0	19.9585	39.978	60.1196	80.0476	100.098
103.6	-39.856	-30.3955	-22.2168	-13.855	-4.5166	6.04248	18.2495	30.5786	44.3115	68.8477	100.769	-100.128	-80.0781	-60.0586	-40.0391	-20.0195	0	19.928	40.0391	60.0586	80.0476	100.128
103.7	-39.856	-30.3955	-22.2778	-13.855	-4.5166	6.04248	18.1885	30.5176	44.4336	68.9087	100.708	-100.098	-80.0781	-60.0891	-40.0391	-20.0195	-91.5527	19.9585	39.978	60.0586	80.0171	100.098
103.8	-39.7949	-30.3955	-22.2778	-13.855	-4.5166	6.16455	18.1274	30.4565	44.4946	69.0308	100.647	-100.159	-80.0476	-60.0891	-40.1001	-19.989	-30.5176	19.928	40.0391	60.0891	80.0476	100.128
103.9	-39.7339	-30.3345	-22.2778	-13.916	-4.45557	6.16455	18.1885	30.3955	44.4946	69.0308	100.708	-100.128	-80.0781	-60.0586	-40.0696	-20.05	-30.5176	20.05	40.0391	60.0891	80.0781	100.098
104	-39.7949	-30.3345	-22.2778	-13.977	-4.39453	6.16455	18.2495	30.3955	44.4336	69.0918	100.708	-100.128	-80.0781	-60.1196	-40.0696	-20.0195	0	20.0806	40.0085	60.0586	80.0781	100.098
104.1	-39.7949	-30.2734	-22.2168	-14.0381	-4.39453	6.10352	18.2495	30.4565	44.4336	69.1528	100.647	-100.159	-80.1086	-60.1196	-40.0696	-19.9585	30.5176	19.989	40.0696	60.1196	80.0476	100.098
104.2	-39.7949	-30.3955	-22.2168	-13.977	-4.45557	6.04248	18.2495	30.5786	44.4946	69.0918	100.647	-100.159	-80.1086	-60.0891	-40.0696	-19.989	0	19.9585	40.1001	59.9976	80.0476	100.098
104.3	-39.856	-30.4565	-22.1558	-13.916	-4.5166	5.98144	18.2495	30.6396	44.5557	69.0918	100.586	-100.128	-80.0781	-60.0891	-40.0391	-19.989	-61.0352	19.9585	40.0085	60.0281	80.0476	100.098
104.4	-39.856	-30.5176	-22.1558	-13.916	-4.57764	5.85937	18.2495	30.5786	44.6167	69.0308	100.525	-100.159	-80.0476	-60.0891	-40.1001	-20.0195	0	19.989	40.0391	60.0891	80.0476	100.098
104.5	-39.917	-30.5786	-22.0947	-13.855	-4.57764	5.7373	18.2495	30.5176	44.6777	69.0308	100.464	-100.159	-80.0781	-60.0891	-40.0696	-20.0195	-61.0352	19.9585	40.0085	60.0586	80.0476	100.098
104.6	-39.917	-30.5176	-22.0337	-13.855	-4.57764	5.67627	18.2495	30.4565	44.7388	69.0308	100.342	-100.128	-80.0476	-60.0281	-40.0391	-20.05	0	19.9585	40.0085	60.0891	80.0171	100.098
104.7	-39.978	-30.5176	-22.0337	-13.7939	-4.57764	5.67627	18.2495	30.4565	44.7998	69.0308	100.342	-100.128	-80.0476	-60.0586	-40.0696	-20.05	-61.0352	19.989	40.0391	60.0586	80.0476	100.098
104.8	-40.0391	-30.4565	-21.9727	-13.7939	-4.5166	5.7373	18.1885	30.5176	44.7998	69.0308	100.342	-100.159	-80.0171	-60.0586	-40.0391	-20.0195	0	19.989	40.0085	60.0281	80.0781	100.098
104.9	-40.0391	-30.4565	-21.9727	-13.7939	-4.5166	5.79834	18.1274	30.5786	44.8608	69.0918	100.342	-100.128	-80.1086	-60.0891	-40.1001	-19.989	-30.5176	20.0195	40.0696	60.0281	80.0781	100.067
105	-39.978	-30.5176	-22.0337	-13.7939	-4.5166	5.92041	18.0664	30.6396	44.7998	69.0918	100.403	-100.159	-80.0781	-60.0586	-40.0085	-20.05	30.5176	19.989	40.0085	60.0281	80.0781	100.098
105.1	-39.856	-30.5176	-22.0337	-13.7939	-4.5166	5.98144	18.1274	30.6396	44.7388	69.0918	100.403	-100.189	-80.1086	-60.0586	-40.0696	-20.0195	-30.5176	19.989	40.0391	59.9976	80.0171	100.037
105.2	-39.7339	-30.5786	-22.0947	-13.7329	-4.5166	5.92041	18.1274	30.6396	44.6777	69.0918	100.464	-100.128	-80.0781	-60.0281	-39.978	-19.989	-30.5176	19.989	40.0085	60.0281	80.0171	100.067
105.3	-39.5508	-30.5786	-22.1558	-13.7329	-4.5166	5.92041	18.1885	30.6396	44.5557	69.1528	100.464	-100.128	-80.0781	-60.0586	-40.0696	-20.05	-30.5176	19.989	40.0085	60.0586	79.9866	100.098
105.4	-39.4897	-30.5786	-22.1558	-13.6719	-4.5166	5.92041	18.3105	30.6396	44.3726	69.1528	100.525	-100.128	-80.0476	-60.0891	-40.1001	-19.989	-30.5176	19.989	40.0391	60.0586	80.0476	100.128
105.5	-39.5508	-30.4565	-22.0947	-13.6719	-4.45557	5.92041	18.3716	30.7007	44.3115	69.1528	100.525	-100.098	-80.1086	-60.0281	-40.1001	-20.0806	-61.0352	19.9585	39.978	60.0586	80.0476	100.098
105.6	-39.5508	-30.3955	-22.0337	-13.6719	-4.39453	5.98144	18.4326	30.6396	44.2505	69.1528	100.525	-100.128	-80.1086	-60.0891	-40.0391	-19.989	-30.5176	20.05	40.0085	60.0281	80.0781	100.067
105.7	-39.6118	-30.3955	-22.0337	-13.6108	-4.3335	5.98144	18.4326	30.6396	44.3115	69.0918	100.464	-100.098	-80.1392	-60.0586	-40.1306	-20.0195	0	20.0195	40.0391	60.0281	80.0781	100.067
105.8	-39.6118	-30.3955	-22.0337	-13.6108	-4.3335	5.92041	18.4326	30.6396	44.3115	69.0918	100.403	-100.128	-80.1392	-60.0891	-40.0696	-19.989	0	20.0195	40.0391	60.0281	80.0476	100.098
105.9	-39.5508	-30.3955	-22.0947	-13.5498	-4.39453	5.85937	18.4326	30.6396	44.2505	69.0308	100.403	-100.128	-80.0781	-60.0891	-40.0696	-20.05	-30.5176	19.9585	40.0391	60.0586	80.1086	100.067
106	-39.4897	-30.3955	-22.1558	-13.6108	-4.45557	5.7373	18.4326	30.6396	44.2505	69.0308	100.342	-100.159	-80.0781	-60.0281	-40.1001	-20.0195	-30.5176	19.9585	40.0391	60.0281	80.0476	100.128
106.1	-39.3677	-30.4565	-22.1558	-13.6108	-4.5166	5.67627	18.4326	30.7007	44.2505	69.0918	100.281	-100.098	-80.0781	-60.0586	-40.0696	-20.0195	-30.5176	19.8975	40.0085	60.0586	80.1086	100.098
106.2	-39.3066	-30.5176	-22.0947	-13.6719	-4.5166	5.61523	18.3716	30.7617	44.3115	69.1528	100.281	-100.098	-80.1392	-60.0281	-40.1001	-20.0195	-61.0352	19.9585	40.0391	60.0281	80.0171	100.067
106.3	-39.2456	-30.5176	-22.0337	-13.7939	-4.5166	5.61523	18.3716	30.8228	44.3726	69.1528	100.342	-100.067	-80.1086	-60.0281	-40.1001	-20.05	-30.5176	20.0195	39.978	60.0586	80.0781	100.098
106.4	-39.2456	-30.4565	-21.9727	-13.855	-4.5166	5.67627	18.3105	30.8228	44.3726	69.2139	100.403	-100.098	-80.1086	-60.0586	-40.0696	-20.0806	0	19.989	40.0391	59.9976	80.0781	100.098
106.5	-39.2456	-30.3955	-21.9116	-13.916	-4.5166	5.7373	18.2495	30.8228	44.3726	69.2139	100.403	-100.128	-80.1086	-60.0891	-40.1001	-20.05	-30.5176	19.9585	40.0085	60.0281	80.1086	100.128
106.6	-39.2456	-30.3955	-21.8506	-13.916	-4.57764	5.7373	18.2495	30.8228	44.3115	69.2139	100.464	-100.128	-80.1086	-60.0586	-40.0391	-20.0195	30.5176	19.9585	40.0085	60.0586	80.0781	100.037
106.7	-39.2456	-30.4565	-21.8506	-13.855	-4.57764	5.79834	18.1885	30.8228	44.3726	69.2139	100.464	-100.128	-80.1697	-60.0891	-40.0391	-20.0195	-30.5176	19.9585	40.0391	59.9976	80.0476	100.067
106.8	-39.2456	-30.5176	-21.8506	-13.855	-4.57764	5.85937	18.1885	30.7617	44.4336	69.2749	100.525	-100.098	-80.1086	-60.0586	-40.0696	-20.0195	0	19.9585	39.978	60.0586	80.0476	100.128
106.9	-39.3066	-30.5786	-21.9116	-13.855	-4.5166	5.79834	18.1274	30.7007	44.4946	69.2749	100.464	-100.128	-80.1086	-60.0281	-40.0696	-20.05	0	19.989	40.0696	60.0891	80.0476	100.128
107	-39.3066	-30.6396	-21.9727	-13.855	-4.5166	5.67627	18.1274	30.7007	44.5557	69.3359	100.464	-100.128	-80.0781	-60.0586	-40.0391	-20.05	30.5176	19.9585	40.0085	60.0891	80.1086	100.159
107.1	-39.3066	-30.6396	-21.9116	-13.916	-4.57764	5.61523	18.1274	30.6396	44.4946	69.3359	100.464	-100.098	-80.0781	-60.0586	-40.1001	-20.0806	0	19.928	40.0085	60.0281	80.1392	100.098
107.2	-39.3066	-30.5786	-21.8506	-13.977	-4.57764	5.5542	18.2495	30.6396	44.4946	69.2749	100.525	-100.098	-80.1392	-60.0586	-40.1001	-20.0195	0	19.9585	39.978	59.9976	80.1086	100.098
107.3	-39.3677	-30.5176	-21.7285	-14.0381	-4.57764	5.61523	18.3105	30.7007	44.4336	69.2749	100.586	-100.098	-80.1697	-60.0586	-40.1001	-20.0195	0	19.989	39.978	60.0281	80.0476	100.037
107.4	-39.3677	-30.5176	-21.6064	-14.0991	-4.5166	5.67627	18.3105	30.7007	44.4946	69.2139	100.647	-100.098	-80.1392	-60.0281	-40.0696	-20.05	0	20.0195	40.0696	60.0281	80.0476	100.098
107.5	-39.3677	-30.5786	-21.6064	-14.0991	-4.45557	5.7373	18.2495	30.7007	44.4946	69.1528	100.647	-100.098	-80.1392	-60.0891	-40.0391	-20.05	30.5176	19.989	40.0391	60.0281	80.0476	100.189
107.6	-39.3677	-30.5786	-21.6675	-14.0381	-4.45557	5.7373	18.2495	30.7007	44.6167	69.0308	100.586	-100.098	-80.0781	-60.0586	-40.0696	-20.05	0	19.989	40.0696	60.0586	80.1392	100.098
107.7	-39.4287	-30.6396	-21.7285	-14.0381	-4.39453	5.7373	18.1885	30.6396	44.7388	68.9697	100.464	-100.128	-80.1086	-60.0586	-40.0391	-20.0195	0	19.9585	39.978	60.0281	80.0781	100.128
107.8	-39.4287	-30.7007	-21.8506	-13.977	-4.39453	5.7373	18.1885	30.5786	44.7998	69.0308	100.342	-100.037	-80.1392	-59.9976	-40.1001	-20.0195	-30.5176	19.9585	39.978	60.0281	80.0781	100.067
107.9	-39.3677	-30.7007	-21.9116	-13.977	-4.45557	5.7373	18.1885	30.5786	44.8608	69.0918	100.281	-100.067	-80.1697	-60.0586	-40.0696	-20.0195	-91.5527	19.989	39.978	60.0281	80.0781	100.098
108	-39.3677	-30.7007	-21.9727	-14.0991	-4.39453	5.7373	18.1885	30.5176	44.9219	69.1528	100.22	-100.098	-80.0781	-60.1196	-40.1306	-20.0195	0	20.0195	40.0391	60.0586	80.0781	100.128
108.1	-39.3066	-30.7007	-21.9727	-14.1602	-4.45557	5.7373	18.1274	30.5786	44.9219	69.1528	100.159	-100.159	-80.0781	-60.0891	-40.1001	-20.05	30.5176	20.0195	40.0696	60.0281	80.1392	100.098
108.2	-39.2456	-30.7617	-21.9727	-14.1602	-4.45557	5.79834	18.1885	30.5786	44.9219	69.2139	100.098	-100.128	-80.1086	-60.0586	-40.1306	-20.0195	0	19.989	40.0391	60.0281	80.1086	100.128
108.3	-39.1235	-30.7617	-21.9727	-14.1602	-4.5166	5.85937	18.1885	30.5786	44.9829	69.2749	100.098	-100.128	-80.1392	-60.0281	-40.0696	-20.0195	-30.5176	19.9585	40.0085	59.9976	80.0476	100.098
108.4	-39.0625	-30.7007	-21.9116	-14.0991	-4.5166	5.85937	18.1885	30.6396	45.0439	69.3359	100.098	-100.128	-80.1086	-60.0281	-40.0391	-19.989	-61.0352	19.989	39.978	59.9976	80.0781	100.037
108.5	-39.0625	-30.6396	-21.9116	-14.0991	-4.57764	5.85937	18.2495	30.6396	45.0439	69.2749	100.159	-100.098	-80.1392	-60.0281	-40.0696	-20.0195	-30.5176	19.989	40.0391	60.0891	80.0476	100.098
108.6	-39.0625	-30.5786	-21.9116	-14.0991	-4.63867	5.79834	18.3105	30.6396	44.9829	69.2139	100.22	-100.098	-80.0476	-60.0586	-40.0696	-19.989	-30.5176	19.989	40.0696	60.0891	80.1086	100.128
108.7	-39.0625	-30.6396	-21.8506	-14.1602	-4.63867	5.7373	18.3716	30.6396	44.8608	69.2139	100.281	-100.098	-80.0781	-60.0586	-40.1001	-20.05	0	20.0195	40.0391	60.0586	80.1392	100.159
108.8	-39.1235	-30.7007	-21.7895	-14.1602	-4.63867	5.7373	18.4326	30.6396	44.7388	69.1528	100.342	-100.098	-80.1392	-60.0891	-40.1001	-20.0806	-91.5527	19.9585	39.978	60.0586	80.0476	100.098
108.9	-39.2456	-30.7617	-21.7285	-14.0991	-4.63867	5.7373	18.4326	30.6396	44.5557	69.1528	100.403	-100.098	-80.2002	-60.0281	-40.1001	-19.989	-61.0352	19.9585	39.978	59.967	80.0781	100.037
109	-39.3677	-30.8228	-21.7285	-14.0381	-4.69971	5.7373	18.4937	30.5786	44.4946	69.2139	100.403	-100.128	-80.1392	-60.0586	-40.1001	-19.989	-122.07	20.0195	39.978	60.0281	80.1086	100.098
109.1	-39.4287	-30.8838	-21.8506	-13.977	-4.69971	5.7373	18.4937	30.6396	44.4946	69.2139	100.464	-100.128	-80.1086	-60.0586	-40.1001	-20.0195	-30.5176	20.05	40.1001	60.0281	80.0781	100.128
109.2	-39.4287	-30.8228	-21.9116	-13.977	-4.63867	5.7373	18.5547	30.7007	44.5557	69.2749	100.464	-100.128	-80.1086	-60.0891	-40.1001	-20.0195	0	20.0195	40.0391	60.0281	80.1086	100.098
109.3	-39.3066	-30.7617	-21.9727	-13.977	-4.63867	5.79834	18.6157	30.7617	44.5557	69.3359	100.464	-100.128	-80.0781	-60.0891	-40.1306	-20.0195	0	19.9585	40.0085	60.0281	80.0476	100.098
109.4	-39.2456	-30.6396	-21.9727	-13.977	-4.57764	5.79834	18.6157	30.7617	44.6167	69.397	100.525	-100.128	-80.1086	-59.9976	-40.0696	-20.05	30.5176	19.928	39.9475	60.0281	80.0781	100.098
109.5	-39.2456	-30.5176	-21.9116	-13.916	-4.63867	5.79834	18.5547	30.7617	44.6777	69.397	100.586	-100.128	-80.1392	-60.0281	-40.0696	-20.0195	-61.0352	19.928	39.978	60.0281	80.0781	100.067
109.6	-39.2456	-30.4565	-21.9116	-13.916	-4.63867	5.79834	18.4937	30.7617	44.7388	69.397	100.708	-100.067	-80.1086	-60.0281	-40.1001	-20.0195	-30.5176	19.9585	40.0391	59.9976	80.0476	100.067
109.7	-39.3066	-30.5176	-21.8506	-13.977	-4.69971	5.79834	18.4937	30.7007	44.7998	69.458	100.769	-100.128	-80.0476	-60.0586	-40.0696	-20.0195	-30.5176	20.0195	40.0391	60.0891	80.1086	100.128
109.8	-39.3677	-30.5786	-21.7895	-14.0381	-4.76074	5.79834	18.4937	30.6396	44.7998	69.458	100.83	-100.159	-80.0781	-60.0891	-40.1001	-20.0195	30.5176	20.05	40.0696	60.0281	80.0781	100.128
109.9	-39.4287	-30.5786	-21.7285	-14.0381	-4.82178	5.85937	18.4326	30.5786	44.7998	69.458	100.769	-100.189	-80.0781	-60.0891	-40.1001	-20.05	30.5176	19.989	39.978	59.9976	80.0781	100.067
110	-39.5508	-30.5786	-21.7285	-14.0381	-4.76074	5.92041	18.4326	30.5176	44.7388	69.397	100.769	-100.128	-80.1086	-60.0586	-40.0391	-20.05	0	19.9585	39.978	59.967	80.0781	100.037
110.1	-39.6728	-30.5786	-21.7895	-13.977	-4.69971	5.92041	18.4326	30.4565	44.7388	69.2749	100.708	-100.128	-80.0781	-60.0281	-40.0696	-20.0195	-30.5176	19.9585	39.978	60.0586	80.0476	100.128
110.2	-39.7339	-30.5786	-21.8506	-13.977	-4.57764	5.98144	18.4326	30.4565	44.7388	69.1528	100.586	-100.159	-80.0781	-60.0281	-40.1001	-20.0195	-30.5176	19.989	39.978	60.0891	80.1086	100.128
110.3	-39.7339	-30.6396	-21.9116	-13.916	-4.57764	5.98144	18.4326	30.3955	44.7388	69.0918	100.464	-100.128	-80.0476	-60.0586	-40.1001	-20.0195	-30.5176	19.989	40.0085	60.0891	80.0781	100.159
110.4	-39.7339	-30.7007	-21.9727	-13.855	-4.5166	5.92041	18.3716	30.3345	44.7388	69.0918	100.403	-100.098	-80.0781	-60.1196	-40.0696	-20.0195	30.5176	19.9585	39.978	60.0586	80.1392	100.159
110.5	-39.7949	-30.7617	-21.9116	-13.7939	-4.57764	5.92041	18.3105	30.3345	44.7998	69.1528	100.342	-100.128	-80.0781	-60.0586	-40.0696	-20.05	0	19.989	39.978	59.967	80.0476	100.098
110.6	-39.917	-30.8228	-21.8506	-13.7329	-4.69971	5.92041	18.2495	30.3345	44.7388	69.2139	100.342	-100.098	-80.1086	-60.0891	-40.0696	-20.0195	0	19.989	39.978	59.9976	80.0781	100.006
110.7	-39.978	-30.8228	-21.7895	-13.7329	-4.76074	5.85937	18.2495	30.3345	44.6777	69.2139	100.342	-100.067	-80.0781	-60.0891	-40.0085	-19.989	-61.0352	19.989	39.978	60.0281	80.0476	100.037
110.8	-39.978	-30.8228	-21.7895	-13.7329	-4.82178	5.85937	18.2495	30.3345	44.6167	69.2749	100.403	-100.159	-80.1086	-60.0586	-40.0391	-19.989	0	19.989	40.0085	60.0281	80.0171	100.159
110.9	-39.978	-30.8228	-21.7895	-13.7939	-4.76074	5.85937	18.2495	30.3345	44.5557	69.3359	100.525	-100.128	-80.0781	-60.0281	-40.0391	-20.0195	-30.5176	19.989	40.0085	60.0281	80.0781	100.159
111	-39.978	-30.8838	-21.7895	-13.855	-4.69971	5.92041	18.2495	30.3345	44.4946	69.3359	100.586	-100.098	-80.0781	-60.0891	-40.0696	-20.05	-30.5176	19.928	39.978	59.9976	80.1392	100.098
111.1	-40.0391	-30.8838	-21.7895	-13.916	-4.69971	5.92041	18.1885	30.3345	44.4946	69.3359	100.586	-100.067	-80.0476	-60.0891	-40.0696	-20.05	30.5176	19.9585	40.0391	60.0281	80.1392	100.098
111.2	-40.1611	-30.9448	-21.7895	-13.916	-4.69971	5.92041	18.1885	30.3345	44.4946	69.3359	100.586	-100.098	-80.0476	-60.0586	-40.0696	-20.05	-30.5176	19.989	39.978	59.9976	80.0781	100.098
111.3	-40.2222	-31.0669	-21.7895	-13.855	-4.69971	5.85937	18.1885	30.2734	44.5557	69.3359	100.525	-100.098	-80.1086	-60.0891	-40.0696	-20.0806	-30.5176	20.0195	40.0696	59.9976	80.0476	100.128
111.4	-40.1611	-31.1279	-21.8506	-13.7939	-4.63867	5.85937	18.1885	30.3345	44.6167	69.3359	100.464	-100.128	-80.1392	-60.0586	-40.0696	-20.0195	0	19.989	40.0391	60.0586	80.0476	100.128
111.5	-40.0391	-31.0669	-21.9116	-13.7329	-4.63867	5.85937	18.1885	30.2734	44.6167	69.2749	100.403	-100.098	-80.0781	-60.0586	-40.0696	-20.0195	30.5176	19.9585	40.0391	60.0891	80.0781	100.128
111.6	-40.0391	-31.0059	-21.8506	-13.7939	-4.63867	5.85937	18.1885	30.2734	44.6777	69.2749	100.342	-100.128	-80.1086	-60.0586	-39.9475	-20.0195	-30.5176	19.989	40.0696	59.9976	80.0781	100.098
111.7	-40.1001	-30.8838	-21.7895	-13.7939	-4.69971	5.85937	18.2495	30.2734	44.7388	69.3359	100.342	-100.067	-80.1086	-60.0281	-40.0085	-19.989	0	20.0195	40.0391	60.0586	80.0171	100.098
111.8	-40.1001	-30.8228	-21.7285	-13.7329	-4.69971	5.7373	18.2495	30.2734	44.7998	69.397	100.342	-100.098	-80.0781	-60.0891	-40.0391	-19.989	0	19.989	40.0085	60.0586	80.0171	100.128
111.9	-40.1001	-30.7617	-21.7285	-13.6719	-4.69971	5.7373	18.2495	30.2734	44.7998	69.397	100.464	-100.128	-80.1392	-60.1196	-40.0085	-20.0195	-61.0352	19.989	40.0085	60.0586	80.0476	100.098
112	-40.0391	-30.7007	-21.6675	-13.6719	-4.69971	5.79834	18.1885	30.1514	44.7998	69.3359	100.586	-100.128	-80.1392	-60.0586	-40.0391	-19.989	-30.5176	19.9585	40.0085	60.1196	80.1086	100.098
112.1	-40.0391	-30.7007	-21.6675	-13.7329	-4.76074	5.92041	18.3105	30.0903	44.7388	69.2749	100.647	-100.128	-80.0781	-60.0281	-40.0391	-20.0806	-30.5176	19.9585	40.0085	60.0586	80.0781	100.098
112.2	-39.978	-30.7617	-21.6675	-13.7939	-4.76074	5.98144	18.3716	30.0903	44.5557	69.2139	100.647	-100.098	-80.1086	-60.0586	-40.0696	-20.05	-30.5176	20.0195	40.1001	60.0281	80.0781	100.098
112.3	-39.978	-30.7617	-21.6675	-13.7939	-4.69971	5.92041	18.3716	30.1514	44.4336	69.1528	100.525	-100.128	-80.0781	-60.0891	-40.0696	-20.0195	-30.5176	19.9585	40.0391	60.0891	80.0781	100.067
112.4	-39.978	-30.7617	-21.6675	-13.855	-4.63867	5.85937	18.3716	30.2124	44.4946	69.1528	100.403	-100.128	-80.1392	-60.1501	-40.0696	-20.0195	0	19.9585	40.0391	60.0281	80.0171	100.098
112.5	-39.856	-30.8228	-21.6675	-13.855	-4.57764	5.85937	18.3716	30.1514	44.5557	69.2139	100.22	-100.128	-80.1086	-60.0891	-40.0696	-19.989	0	20.0806	40.0696	60.0281	79.9866	100.098
112.6	-39.7949	-30.8228	-21.6675	-13.855	-4.5166	5.85937	18.4326	30.1514	44.6167	69.3359	100.281	-100.189	-80.1392	-60.1196	-40.0696	-20.0195	-30.5176	19.989	40.0391	60.0891	80.0476	100.128
112.7	-39.7339	-30.8838	-21.6675	-13.7939	-4.5166	5.85937	18.4326	30.0903	44.6777	69.397	100.403	-100.128	-80.0781	-60.0891	-40.0391	-19.989	-30.5176	19.9585	40.0391	60.0891	80.1086	100.128
112.8	-39.6118	-30.8838	-21.6064	-13.7329	-4.5166	5.85937	18.4937	30.0903	44.6777	69.458	100.464	-100.159	-80.0171	-60.0586	-40.1001	-20.05	-61.0352	19.8975	39.978	60.0281	80.1392	100.098
112.9	-39.6118	-30.8228	-21.5454	-13.6719	-4.5166	5.92041	18.4937	30.0903	44.6167	69.519	100.464	-100.128	-80.0476	-60.0891	-40.0391	-20.0195	-30.5176	19.9585	39.978	60.0281	80.0781	100.098
113	-39.5508	-30.8228	-21.4844	-13.6108	-4.45557	5.92041	18.4937	30.1514	44.5557	69.5801	100.464	-100.159	-80.1086	-60.0891	-40.1001	-20.05	-30.5176	20.0195	40.0391	59.967	80.0476	100.067
113.1	-39.5508	-30.8228	-21.4844	-13.6108	-4.39453	5.92041	18.4937	30.2124	44.4946	69.5801	100.403	-100.159	-80.1392	-60.0891	-40.0696	-20.05	-30.5176	20.0195	40.0391	60.0586	80.0476	100.067
113.2	-39.5508	-30.8228	-21.5454	-13.7329	-4.39453	5.92041	18.4937	30.2124	44.4946	69.519	100.342	-100.159	-80.1086	-60.0281	-40.0696	-20.0195	30.5176	20.0195	40.0391	60.0891	79.9866	100.067
113.3	-39.5508	-30.8228	-21.5454	-13.7329	-4.39453	5.85937	18.4937	30.3345	44.4946	69.458	100.403	-100.128	-80.1392	-60.0281	-40.0391	-20.0195	0	19.928	39.978	60.0586	80.0476	100.067
113.4	-39.4897	-30.8228	-21.6064	-13.7939	-4.45557	5.85937	18.4937	30.3345	44.4946	69.397	100.525	-100.159	-80.0476	-60.0586	-40.0391	-20.0195	0	19.9585	40.0085	60.0891	80.1086	100.098
113.5	-39.4897	-30.8838	-21.5454	-13.7329	-4.45557	5.85937	18.4326	30.3345	44.4946	69.2749	100.586	-100.128	-80.0781	-60.1196	-40.0391	-20.0806	-30.5176	19.989	40.0391	60.0891	80.0781	100.098
113.6	-39.4897	-30.8838	-21.4844	-13.7329	-4.5166	5.85937	18.3105	30.3345	44.5557	69.2139	100.647	-100.22	-80.0781	-60.0586	-40.0391	-20.0806	-30.5176	19.989	40.0391	60.0281	80.1086	100.098
113.7	-39.5508	-30.8228	-21.4233	-13.6108	-4.5166	5.85937	18.3105	30.2734	44.6167	69.1528	100.647	-100.159	-80.1392	-60.0891	-40.0391	-20.05	-30.5176	19.989	39.9475	60.0281	80.0476	100.037
113.8	-39.5508	-30.7617	-21.4233	-13.6108	-4.5166	5.85937	18.3105	30.2734	44.6167	69.0918	100.647	-100.128	-80.1086	-60.0891	-40.0696	-20.05	-30.5176	19.989	40.0085	60.0281	80.0476	100.067
113.9	-39.5508	-30.7007	-21.4844	-13.6108	-4.5166	5.92041	18.2495	30.2734	44.5557	69.0308	100.586	-100.128	-80.1086	-60.1196	-40.0696	-20.05	-30.5176	19.989	39.978	59.9976	80.0171	100.067
114	-39.4897	-30.6396	-21.5454	-13.5498	-4.57764	6.04248	18.2495	30.3345	44.4336	68.9087	100.525	-100.128	-80.1086	-60.1196	-40.0696	-19.9585	0	19.989	40.0085	60.0586	80.0476	100.098
114.1	-39.4897	-30.7007	-21.7285	-13.5498	-4.57764	6.10352	18.2495	30.3955	44.3726	68.8477	100.525	-100.189	-80.0781	-60.0891	-40.0391	-20.0195	30.5176	20.0195	40.0391	60.0281	80.0476	100.128
114.2	-39.4897	-30.7617	-21.7895	-13.5498	-4.63867	6.16455	18.2495	30.3345	44.3726	68.7866	100.464	-100.128	-80.0476	-60.0586	-40.0391	-19.989	-30.5176	20.0195	40.0085	60.0891	80.0171	100.128
114.3	-39.4897	-30.8228	-21.8506	-13.5498	-4.69971	6.22559	18.3105	30.3345	44.3726	68.7866	100.464	-100.159	-80.0781	-60.1196	-40.0391	-20.05	-61.0352	19.9585	40.0696	60.0281	80.0476	100.128
114.4	-39.6118	-30.8838	-21.8506	-13.4888	-4.69971	6.22559	18.3105	30.3345	44.3726	68.7866	100.464	-100.159	-80.0781	-60.0586	-40.0696	-20.05	-30.5176	19.989	39.978	60.0891	80.0476	100.098
114.5	-39.6118	-30.8838	-21.7895	-13.4277	-4.63867	6.10352	18.3105	30.3345	44.3726	68.8477	100.403	-100.128	-80.0781	-60.1501	-40.0391	-20.05	-30.5176	19.9585	40.0085	60.0281	80.0476	100.128
114.6	-39.5508	-30.8838	-21.7285	-13.3667	-4.57764	6.04248	18.2495	30.2734	44.4336	68.9087	100.342	-100.128	-80.1086	-60.1196	-40.0696	-20.0806	-30.5176	19.989	40.0391	60.0586	80.0781	100.067
114.7	-39.4897	-30.8228	-21.7285	-13.3667	-4.5166	6.04248	18.1885	30.2734	44.4946	68.9087	100.403	-100.159	-80.0781	-60.0891	-40.0085	-20.0806	0	19.9585	40.0391	60.0281	80.0476	100.098
114.8	-39.4287	-30.8228	-21.7285	-13.4277	-4.5166	6.04248	18.1274	30.3345	44.5557	68.9697	100.464	-100.189	-80.1086	-60.1501	-40.0696	-20.0195	30.5176	19.9585	40.0391	60.0586	80.0171	100.128
114.9	-39.4287	-30.8228	-21.7285	-13.4277	-4.45557	6.16455	18.0664	30.3955	44.6167	68.9697	100.647	-100.189	-80.0781	-60.1196	-40.0085	-20.0195	-30.5176	19.989	39.978	60.1196	79.9866	100.098
115	-39.4287	-30.7617	-21.7285	-13.4277	-4.45557	6.22559	18.0054	30.4565	44.6167	68.9087	100.708	-100.159	-80.0781	-60.1196	-40.0391	-20.0195	0	19.989	40.0696	60.0891	80.0171	100.128
115.1	-39.4897	-30.7617	-21.6675	-13.3667	-4.5166	6.28662	17.9443	30.4565	44.5557	68.8477	100.769	-100.22	-80.0781	-60.0891	-40.0085	-20.0806	0	19.9585	40.0391	60.0891	79.9866	100.159
115.2	-39.5508	-30.7617	-21.6064	-13.3667	-4.5166	6.22559	17.9443	30.4565	44.5557	68.8477	100.891	-100.128	-80.0781	-60.0891	-40.0391	-20.0806	30.5176	19.9585	40.0391	60.0586	80.0781	100.128
115.3	-39.5508	-30.7617	-21.6064	-13.4277	-4.57764	6.16455	18.0054	30.4565	44.4946	68.8477	101.013	-100.159	-80.0476	-60.1501	-40.0391	-20.0806	-30.5176	19.8975	39.978	60.0586	80.0781	100.037
115.4	-39.6728	-30.8228	-21.5454	-13.4277	-4.63867	6.10352	18.0664	30.4565	44.4946	68.7866	101.196	-100.128	-80.1392	-60.0891	-40.0085	-20.0806	0	19.928	39.978	60.0586	80.0476	100.067
115.5	-39.7339	-30.8838	-21.4844	-13.4888	-4.63867	6.10352	18.1274	30.4565	44.4946	68.7256	101.318	-100.159	-80.1392	-60.1501	-40.0391	-20.0195	0	19.989	40.0085	60.0281	80.0171	100.098
115.6	-39.856	-30.8838	-21.4844	-13.5498	-4.63867	6.04248	18.1885	30.5176	44.5557	68.6645	101.44	-100.159	-80.0476	-60.1196	-40.0085	-20.0195	0	20.0195	40.0391	60.0586	80.0476	100.128
115.7	-39.978	-30.8838	-21.4233	-13.6108	-4.63867	5.92041	18.1274	30.5786	44.6167	68.7256	101.501	-100.159	-80.0781	-60.0891	-39.978	-19.989	61.0352	20.0195	40.0696	60.1196	80.0476	100.128
115.8	-40.1001	-30.8838	-21.3623	-13.6108	-4.57764	5.85937	18.1885	30.5786	44.6777	68.8477	101.562	-100.159	-80.0781	-60.1501	-40.0085	-20.05	-30.5176	19.989	40.0085	60.0281	80.0476	100.098
115.9	-40.1611	-30.8838	-21.3013	-13.5498	-4.57764	5.85937	18.2495	30.6396	44.6777	68.9087	101.624	-100.098	-80.0476	-60.0891	-40.0391	-19.989	0	19.9585	40.0391	60.0891	80.0476	100.037
116	-40.1611	-30.8838	-21.2402	-13.4888	-4.5166	5.85937	18.3105	30.6396	44.6777	68.8477	101.624	-100.159	-80.0476	-60.0586	-40.0391	-20.05	0	19.989	40.0391	60.0586	79.9866	100.037
116.1	-40.1611	-30.8838	-21.2402	-13.4888	-4.5166	5.85937	18.3105	30.5786	44.6777	68.7866	101.624	-100.159	-80.0781	-60.1196	-40.0085	-19.989	-30.5176	19.9585	40.0085	60.0891	80.0171	100.098
116.2	-40.1611	-30.9448	-21.1792	-13.4888	-4.5166	5.92041	18.3105	30.5786	44.6777	68.6645	101.501	-100.159	-80.0781	-60.1196	-40.0391	-20.1111	-30.5176	19.989	40.0391	60.1501	80.0476	100.159
116.3	-40.1611	-31.0059	-21.1182	-13.4888	-4.45557	5.92041	18.3105	30.5786	44.6777	68.6035	101.44	-100.189	-80.0781	-60.1196	-40.0085	-20.0806	0	19.989	40.0085	60.0586	80.0781	100.159
116.4	-40.2222	-31.0669	-21.0571	-13.4888	-4.45557	5.92041	18.2495	30.5786	44.6167	68.4814	101.318	-100.128	-80.1086	-60.0891	-40.0085	-20.0195	30.5176	19.989	40.0391	60.0891	80.0171	100.067
116.5	-40.2222	-31.1279	-20.9961	-13.4888	-4.39453	5.98144	18.2495	30.6396	44.6777	68.4204	101.318	-100.159	-80.1697	-60.1196	-40.0696	-20.05	-30.5176	19.9585	40.0696	60.0586	80.0171	100.067
116.6	-40.2832	-31.189	-20.9351	-13.4277	-4.45557	6.10352	18.2495	30.6396	44.7388	68.4204	101.379	-100.128	-80.1086	-60.0891	-40.0391	-20.0195	-30.5176	20.0195	40.0696	60.0891	80.0171	100.098
116.7	-40.3442	-31.1279	-20.9351	-13.3667	-4.45557	6.22559	18.2495	30.5786	44.7998	68.4204	101.379	-100.159	-80.0781	-60.0891	-40.0391	-20.0195	30.5176	19.9585	40.0696	60.0891	80.0781	100.128
116.8	-40.3442	-31.0669	-20.9351	-13.3667	-4.45557	6.28662	18.2495	30.5176	44.7998	68.4204	101.44	-100.159	-80.1086	-60.0891	-39.978	-20.0195	61.0352	20.0195	40.0696	60.1196	80.0476	100.098
116.9	-40.4053	-31.0059	-20.9351	-13.3057	-4.45557	6.34766	18.2495	30.4565	44.7388	68.4204	101.501	-100.128	-80.0781	-60.0891	-40.0391	-20.05	30.5176	19.9585	40.0085	60.0891	80.0781	100.067
117	-40.4053	-31.0669	-20.9351	-13.2446	-4.39453	6.28662	18.3105	30.4565	44.6777	68.4814	101.624	-100.159	-80.1392	-60.0891	-40.0391	-20.05	0	19.9585	39.978	60.0891	80.0781	100.006
117.1	-40.4663	-31.1279	-20.9351	-13.2446	-4.39453	6.22559	18.3105	30.3955	44.6167	68.5425	101.685	-100.098	-80.0781	-60.1501	-40.0696	-20.0195	-30.5176	20.0195	39.978	59.9976	79.9866	100.098
117.2	-40.4663	-31.0669	-20.9351	-13.2446	-4.45557	6.10352	18.3105	30.3345	44.6167	68.4814	101.746	-100.128	-80.0781	-60.0891	-40.0391	-20.05	-30.5176	19.989	40.0391	60.0281	80.0171	100.098
117.3	-40.4663	-31.0669	-20.9351	-13.2446	-4.5166	5.98144	18.2495	30.2734	44.6167	68.4204	101.807	-100.159	-80.1086	-60.0891	-39.978	-20.0195	30.5176	20.05	40.0391	60.0586	80.0476	100.098
117.4	-40.4053	-31.0669	-20.9351	-13.2446	-4.5166	5.98144	18.2495	30.1514	44.6167	68.4204	101.746	-100.159	-80.1086	-60.0891	-40.0391	-19.989	30.5176	20.0195	40.0696	60.1196	80.0781	100.159
117.5	-40.4053	-31.0669	-20.874	-13.1836	-4.45557	6.04248	18.2495	30.1514	44.6777	68.4814	101.746	-100.189	-80.1392	-60.0281	-40.0085	-20.05	0	19.928	40.0085	60.0891	79.9866	100.067
117.6	-40.4663	-31.1279	-20.813	-13.1226	-4.39453	6.10352	18.2495	30.1514	44.7388	68.5425	101.685	-100.159	-80.0781	-60.0891	-40.1001	-19.9585	-61.0352	19.928	39.978	60.0586	80.0171	100.037
117.7	-40.5273	-31.1279	-20.813	-13.1226	-4.3335	6.10352	18.1885	30.2124	44.7998	68.5425	101.624	-100.159	-80.1086	-60.0586	-40.0696	-20.0195	-91.5527	19.928	39.978	60.0891	80.0171	100.037
117.8	-40.5884	-31.1279	-20.813	-13.1226	-4.39453	6.10352	18.1274	30.3345	44.7998	68.4814	101.624	-100.128	-80.0476	-60.1196	-40.0696	-20.0195	-30.5176	20.0195	40.0696	60.0891	80.0171	100.067
117.9	-40.7104	-31.1279	-20.874	-13.1226	-4.45557	6.10352	18.1274	30.3955	44.7388	68.4204	101.624	-100.159	-80.1086	-60.1196	-40.0391	-20.05	61.0352	20.0195	40.0391	60.0891	80.0476	100.098
118	-40.7715	-31.1279	-20.874	-13.1836	-4.45557	6.10352	18.1274	30.3955	44.6167	68.2983	101.624	-100.159	-80.1086	-60.1501	-40.0085	-20.05	30.5176	19.989	40.0085	60.1196	79.9866	100.098
118.1	-40.8325	-31.189	-20.874	-13.2446	-4.45557	6.10352	18.1885	30.4565	44.5557	68.2983	101.562	-100.159	-80.1086	-60.0891	-40.0391	-20.0195	30.5176	19.989	39.978	60.0586	79.9561	100.098
118.2	-40.8936	-31.189	-20.9351	-13.3057	-4.45557	6.10352	18.1885	30.4565	44.4336	68.2983	101.562	-100.189	-80.1392	-60.0586	-40.0391	-20.0195	-91.5527	19.928	40.0085	60.0281	80.0171	100.098
118.3	-40.9546	-31.189	-20.9961	-13.4277	-4.45557	6.10352	18.1885	30.5176	44.3115	68.4204	101.44	-100.189	-80.1086	-60.0586	-40.0696	-20.0195	-61.0352	19.928	40.0085	60.0281	80.0171	100.098
118.4	-40.9546	-31.1279	-20.9961	-13.4277	-4.39453	6.10352	18.1274	30.5176	44.3115	68.4814	101.379	-100.189	-80.0476	-60.1196	-40.0085	-19.989	30.5176	19.989	40.0696	60.0891	80.0781	100.128
118.5	-40.8936	-31.0059	-20.9351	-13.4277	-4.39453	6.16455	18.0664	30.5176	44.3726	68.5425	101.318	-100.159	-80.0476	-60.0891	-40.0696	-20.0806	-30.5176	20.0195	40.0391	60.1196	80.1086	100.128
118.6	-40.8936	-30.9448	-20.874	-13.4277	-4.39453	6.16455	18.0664	30.4565	44.4336	68.4814	101.257	-100.098	-80.0781	-60.1196	-40.0696	-20.05	30.5176	20.0195	40.0391	60.0891	80.0476	100.067
118.7	-40.8936	-30.8838	-20.813	-13.3667	-4.45557	6.28662	18.0664	30.4565	44.4946	68.5425	101.196	-100.098	-80.1086	-60.1196	-40.0696	-20.0806	0	19.928	40.0391	60.0281	79.9561	100.037
118.8	-41.0156	-30.8228	-20.813	-13.3667	-4.5166	6.28662	18.0054	30.4565	44.5557	68.6035	101.135	-100.128	-80.0781	-60.0891	-40.0391	-20.0195	-30.5176	19.9585	39.978	60.0586	79.9866	100.037
118.9	-41.0767	-30.8838	-20.813	-13.3057	-4.5166	6.22559	18.0054	30.4565	44.6167	68.6645	101.135	-100.159	-80.1086	-60.0586	-40.0696	-20.0195	-30.5176	19.989	40.0085	60.0586	80.0476	100.098
119	-41.0767	-30.9448	-20.813	-13.2446	-4.5166	6.22559	18.0054	30.5176	44.6167	68.6645	101.135	-100.159	-80.1086	-60.0891	-40.0391	-19.989	0	19.989	40.0391	60.0891	80.1086	100.159
119.1	-41.0767	-31.0059	-20.874	-13.2446	-4.57764	6.22559	18.0054	30.5176	44.5557	68.6645	101.135	-100.128	-80.0476	-60.1196	-40.0391	-19.9585	30.5176	19.989	40.0391	60.0891	80.0781	100.128
119.2	-41.0156	-31.0669	-20.874	-13.2446	-4.63867	6.22559	18.0054	30.5176	44.5557	68.6645	101.135	-100.189	-80.1086	-60.0891	-40.0085	-20.05	0	19.928	40.0696	60.0891	80.0171	100.098
119.3	-40.9546	-31.0669	-20.874	-13.2446	-4.63867	6.22559	18.0054	30.5176	44.5557	68.6035	101.196	-100.189	-80.1392	-60.0891	-40.0391	-20.0806	0	19.9585	39.9475	60.0891	80.0781	100.098
119.4	-40.9546	-30.9448	-20.9351	-13.3057	-4.69971	6.16455	18.0054	30.5786	44.5557	68.6645	101.196	-100.128	-80.0781	-60.0891	-40.0696	-20.0195	-30.5176	19.9585	40.0391	60.0281	80.0476	100.067
119.5	-40.9546	-30.7617	-20.813	-13.3667	-4.69971	6.16455	18.0054	30.5786	44.5557	68.6645	101.257	-100.128	-80.1392	-60.0891	-40.0391	-20.05	-30.5176	19.9585	39.978	60.0281	80.0476	100.098
119.6	-41.0767	-30.7007	-20.752	-13.3667	-4.76074	6.16455	18.0054	30.5176	44.6167	68.7256	101.257	-100.098	-80.1392	-60.0586	-40.0696	-20.0195	0	19.9585	40.0391	60.0586	80.0476	100.128
119.7	-41.1377	-30.7007	-20.813	-13.3667	-4.76074	6.22559	18.0664	30.4565	44.6777	68.7866	101.257	-100.159	-80.1086	-60.0891	-40.0085	-20.0195	30.5176	19.989	40.0085	59.9976	80.0781	100.159
119.8	-41.1987	-30.8228	-20.9351	-13.4277	-4.69971	6.22559	18.1274	30.4565	44.7388	68.8477	101.318	-100.128	-80.0781	-60.0586	-40.0391	-20.1111	0	19.989	40.0391	60.0586	80.0476	100.067
119.9	-41.1987	-30.9448	-21.0571	-13.4888	-4.57764	6.22559	18.1885	30.4565	44.7998	68.8477	101.44	-100.128	-80.0781	-60.0586	-40.0391	-20.0195	30.5176	19.9585	40.0391	60.0586	80.0476	100.067
120	-41.1377	-31.0669	-21.1182	-13.6108	-4.5166	6.22559	18.2495	30.5786	44.8608	68.8477	101.501	-100.128	-80.1086	-60.0891	-40.0391	-20.0195	-91.5527	19.9585	39.978	60.0586	80.0171	100.098
120.1	-41.1377	-31.1279	-21.0571	-13.6108	-4.57764	6.16455	18.3105	30.5786	44.8608	68.8477	101.501	-100.128	-80.1697	-60.0586	-40.0696	-20.05	-30.5176	19.8975	40.0085	60.0891	80.1392	100.128
120.2	-41.1377	-31.1279	-21.0571	-13.6108	-4.57764	6.10352	18.3105	30.6396	44.8608	68.7866	101.624	-100.128	-80.1086	-60.0891	-40.0391	-20.0195	-30.5176	19.9585	40.0085	60.0281	80.0476	100.128
120.3	-41.1987	-31.0669	-21.0571	-13.4888	-4.57764	6.04248	18.2495	30.6396	44.8608	68.7256	101.807	-100.098	-80.0781	-60.1196	-40.0696	-20.0195	-30.5176	19.989	40.0085	60.0586	80.1392	100.098
120.4	-41.2598	-30.9448	-21.0571	-13.4277	-4.57764	6.04248	18.2495	30.5176	44.9219	68.7256	101.929	-100.098	-80.1086	-60.0891	-40.0696	-19.989	30.5176	19.989	40.0696	59.9976	80.0171	100.067
120.5	-41.3818	-30.8838	-21.1182	-13.3667	-4.57764	6.04248	18.2495	30.3955	44.7998	68.7866	102.051	-100.098	-80.1086	-60.1196	-40.0391	-20.0195	-30.5176	20.05	39.978	60.0586	80.0171	100.128
120.6	-41.4429	-30.8228	-21.1182	-13.3667	-4.57764	6.04248	18.2495	30.3955	44.6777	68.7866	102.173	-100.128	-80.1697	-60.0891	-40.0391	-20.05	-30.5176	20.0195	40.0391	60.0891	80.0171	100.128
120.7	-41.4429	-30.7617	-21.0571	-13.4277	-4.57764	6.04248	18.1885	30.4565	44.5557	68.6645	102.295	-100.098	-80.1086	-59.9976	-40.0696	-20.05	0	20.0195	40.0391	60.0281	80.0476	100.128
120.8	-41.4429	-30.7617	-21.0571	-13.4277	-4.57764	6.04248	18.1274	30.4565	44.4946	68.5425	102.234	-100.128	-80.1392	-60.0586	-40.0391	-20.05	0	19.989	39.978	60.0891	80.0781	100.159
120.9	-41.5039	-30.7617	-20.9351	-13.4888	-4.57764	6.04248	18.0664	30.4565	44.4946	68.5425	102.234	-100.128	-80.1086	-60.0891	-40.1001	-20.0195	-30.5176	19.989	40.0696	60.0891	80.1392	100.159
121	-41.5039	-30.8228	-20.874	-13.4888	-4.57764	6.04248	18.0054	30.5176	44.5557	68.6035	102.173	-100.098	-80.0476	-60.0891	-40.0696	-20.05	0	19.9585	40.0391	60.0586	80.0781	100.098
121.1	-41.4429	-30.7617	-20.813	-13.5498	-4.57764	6.04248	17.8833	30.5786	44.6167	68.7256	102.112	-100.128	-80.1086	-60.1196	-40.0696	-20.0195	-30.5176	19.989	40.1001	60.0586	80.0171	100.098
121.2	-41.3818	-30.7617	-20.813	-13.6108	-4.57764	6.04248	17.8223	30.6396	44.6777	68.7866	101.99	-100.098	-80.0781	-60.0891	-40.0696	-20.05	0	19.989	40.0391	60.0586	80.0476	100.067
121.3	-41.3208	-30.7007	-20.813	-13.6108	-4.63867	6.10352	17.8223	30.7617	44.6777	68.7866	101.807	-100.098	-80.1392	-60.0586	-40.0696	-20.05	-30.5176	20.0195	40.0391	60.0891	80.0781	100.128
121.4	-41.1987	-30.7007	-20.813	-13.6719	-4.63867	6.04248	17.8833	30.7617	44.6777	68.7256	101.685	-100.128	-80.1086	-60.0891	-40.0391	-20.0195	0	19.9585	40.0085	60.0586	80.0781	100.067
121.5	-41.0767	-30.7007	-20.874	-13.6108	-4.63867	5.98144	17.9443	30.8228	44.6777	68.6645	101.562	-100.128	-80.0781	-60.0281	-40.0696	-19.989	-30.5176	19.989	40.0391	60.0281	80.0781	100.098
121.6	-41.0156	-30.7617	-20.9961	-13.5498	-4.69971	5.98144	18.0054	30.8228	44.7388	68.6035	101.624	-100.128	-80.0781	-60.0891	-40.0696	-19.989	0	19.9585	40.0391	60.0586	80.0781	100.159
121.7	-40.9546	-30.7617	-20.9961	-13.4888	-4.76074	5.98144	18.0054	30.7617	44.7998	68.6035	101.685	-100.159	-80.0781	-60.0891	-40.0391	-20.05	0	19.989	40.0696	60.0281	80.0781	100.098
121.8	-41.0156	-30.7617	-21.0571	-13.4277	-4.76074	5.92041	18.0054	30.6396	44.9219	68.4814	101.746	-100.159	-80.0781	-60.0891	-40.0696	-20.0195	-30.5176	20.0195	40.0085	60.1196	80.0476	100.098
121.9	-41.0156	-30.7007	-20.9961	-13.3667	-4.69971	5.98144	18.0054	30.6396	44.9829	68.3594	101.807	-100.128	-80.1086	-60.0281	-40.1001	-19.989	-30.5176	19.989	40.0391	60.0586	80.0781	100.067
122	-41.0156	-30.7617	-20.9351	-13.3667	-4.69971	5.92041	18.0054	30.6396	44.9829	68.2983	101.807	-100.067	-80.0781	-60.0281	-40.1001	-19.989	-30.5176	20.05	40.0085	60.0281	80.0476	100.067
122.1	-40.9546	-30.8228	-20.9351	-13.4277	-4.63867	5.98144	18.0054	30.7007	44.9219	68.2373	101.868	-100.128	-80.1086	-60.0891	-40.0696	-19.9585	0	20.0195	40.0391	60.0586	80.0171	100.098
122.2	-40.9546	-30.8838	-20.9351	-13.4277	-4.5166	5.98144	17.9443	30.7007	44.9219	68.1763	101.929	-100.098	-80.1392	-60.0891	-40.1001	-20.0195	-30.5176	20.0195	39.978	60.0281	80.0476	100.098
122.3	-40.9546	-30.8838	-20.9351	-13.4888	-4.45557	6.04248	17.9443	30.7007	44.9219	68.0542	101.929	-100.159	-80.1392	-60.0586	-40.0391	-20.0195	30.5176	20.0195	40.0085	60.0281	80.0476	100.098
122.4	-40.9546	-30.8838	-20.9351	-13.4888	-4.39453	6.10352	17.9443	30.7007	44.9219	67.9932	101.868	-100.128	-80.0171	-60.0586	-40.0696	-20.0806	0	19.989	39.978	60.0586	80.0476	100.098
122.5	-40.8936	-30.8838	-20.9961	-13.5498	-4.39453	6.16455	18.0054	30.7617	44.9219	67.9932	101.868	-100.128	-80.0781	-60.0891	-40.1001	-20.0195	-30.5176	19.989	40.0085	60.0891	80.0476	100.098
122.6	-40.8936	-30.8838	-21.0571	-13.6108	-4.45557	6.10352	18.0664	30.7617	44.9829	67.9932	101.929	-100.128	-80.0476	-60.0891	-40.0696	-19.989	-91.5527	19.989	40.0391	60.0281	80.0476	100.098
122.7	-40.8936	-30.8838	-21.1792	-13.6108	-4.5166	6.04248	18.0664	30.7617	45.0439	68.0542	101.929	-100.067	-80.0476	-60.0891	-40.0696	-20.05	30.5176	20.0195	40.0391	60.0586	80.0476	100.098
122.8	-40.8936	-30.8228	-21.3013	-13.5498	-4.57764	5.98144	18.1274	30.7617	45.105	68.0542	101.929	-100.128	-80.1392	-60.1501	-40.1001	-19.989	30.5176	19.9585	40.0391	60.0281	80.0476	100.067
122.9	-40.8325	-30.8228	-21.3623	-13.4888	-4.5166	5.92041	18.1274	30.8838	45.105	68.1152	101.868	-100.128	-80.1086	-60.0586	-40.0696	-20.0195	30.5176	19.989	40.0391	60.0586	80.0476	100.067
123	-40.8936	-30.8838	-21.4233	-13.4277	-4.5166	5.85937	18.1274	30.9448	45.105	68.1152	101.807	-100.128	-80.1086	-60.0891	-40.0391	-20.0195	0	19.989	39.978	59.967	80.0171	100.037
123.1	-40.8325	-30.9448	-21.3623	-13.4277	-4.5166	5.85937	18.1274	30.9448	45.105	68.1763	101.746	-100.128	-80.1086	-60.0586	-40.1001	-19.989	0	19.989	40.0391	60.0281	80.0171	100.098
123.2	-40.8325	-31.0059	-21.3623	-13.3667	-4.57764	5.92041	18.1274	30.8838	45.105	68.1763	101.746	-100.159	-80.0781	-60.0586	-40.0696	-19.989	-30.5176	20.0195	40.0391	60.0586	80.0781	100.128
123.3	-40.7715	-31.0059	-21.3623	-13.4277	-4.57764	5.92041	18.1274	30.8228	45.105	68.2373	101.807	-100.159	-80.0476	-60.0891	-40.1001	-20.0806	0	20.0195	40.1001	60.0586	80.1086	100.098
123.4	-40.7104	-31.0059	-21.4233	-13.4888	-4.57764	5.92041	18.1274	30.7617	45.105	68.2983	101.929	-100.128	-80.0781	-60.0891	-40.1001	-20.05	0	19.989	40.0391	60.0586	80.1392	100.098
123.5	-40.7104	-31.0059	-21.4844	-13.5498	-4.63867	5.92041	18.1885	30.7617	45.166	68.3594	101.99	-100.098	-80.0781	-60.0586	-40.1001	-20.0195	-30.5176	19.9585	39.978	60.0891	80.0781	100.037
123.6	-40.7104	-31.0059	-21.5454	-13.6108	-4.63867	5.92041	18.1274	30.7617	45.227	68.4814	101.929	-100.128	-80.0781	-60.0586	-40.1001	-20.0195	-30.5176	19.989	40.0085	59.9976	80.0781	100.037
123.7	-40.7104	-30.9448	-21.5454	-13.6108	-4.63867	5.98144	18.1274	30.7007	45.166	68.5425	101.746	-100.128	-80.0781	-60.1196	-40.1306	-19.9585	0	19.9585	39.978	59.967	80.0781	100.067
123.8	-40.7104	-30.8838	-21.5454	-13.6719	-4.69971	5.98144	18.1274	30.6396	45.166	68.5425	101.624	-100.128	-80.1392	-60.0891	-39.978	-19.989	30.5176	20.0806	40.0391	60.0281	80.0781	100.098
123.9	-40.6494	-30.8838	-21.4844	-13.7939	-4.63867	5.85937	18.1274	30.5176	45.166	68.6035	101.501	-100.098	-80.0781	-60.0281	-40.0391	-20.0195	30.5176	19.989	40.0391	60.0281	80.0781	100.128
124	-40.5884	-30.8838	-21.4844	-13.855	-4.63867	5.85937	18.1885	30.3955	45.166	68.6035	101.501	-100.098	-80.0781	-60.0281	-40.0391	-20.05	30.5176	19.989	40.0391	59.967	80.0781	100.098
124.1	-40.5273	-30.9448	-21.4233	-13.916	-4.5166	5.79834	18.2495	30.3345	45.166	68.6035	101.624	-100.128	-80.0781	-60.0281	-40.1001	-20.05	-30.5176	19.9585	40.0391	59.9976	80.1392	100.037
124.2	-40.4663	-30.9448	-21.3623	-13.916	-4.45557	5.79834	18.2495	30.3345	45.166	68.6035	101.685	-100.128	-80.0781	-60.1196	-40.1001	-19.989	-61.0352	20.0195	40.0391	60.0281	80.0781	100.037
124.3	-40.4053	-30.9448	-21.3013	-13.977	-4.5166	5.85937	18.1885	30.3955	45.166	68.6035	101.746	-100.098	-80.0781	-60.0891	-40.1001	-19.989	0	19.989	40.0391	60.0281	80.0781	100.037
124.4	-40.3442	-31.0059	-21.3013	-14.0381	-4.57764	5.85937	18.1274	30.4565	45.166	68.6035	101.746	-100.128	-80.1697	-60.1196	-40.1001	-20.0195	30.5176	19.989	40.0391	60.0586	80.1086	100.159
124.5	-40.3442	-31.0669	-21.3013	-14.0381	-4.63867	5.98144	18.0664	30.5176	45.166	68.6645	101.685	-100.067	-80.1392	-60.0586	-40.1001	-20.05	30.5176	20.0195	40.0391	59.9976	80.0781	100.098
124.6	-40.2222	-31.1279	-21.3623	-14.0381	-4.69971	6.04248	18.0054	30.5786	45.166	68.8477	101.624	-100.006	-80.1086	-59.9976	-40.0696	-19.989	-61.0352	19.989	40.0085	59.9976	80.0476	100.006
124.7	-40.2222	-31.1279	-21.3623	-14.0381	-4.69971	6.16455	18.0054	30.5786	45.105	68.9087	101.562	-100.098	-80.0476	-60.0586	-40.1001	-19.989	30.5176	19.989	40.0391	60.0891	80.0171	100.067
124.8	-40.1611	-31.189	-21.3623	-14.0381	-4.63867	6.28662	18.0664	30.5176	45.0439	68.8477	101.44	-100.128	-80.0476	-60.1501	-40.1001	-20.0195	-30.5176	20.0195	40.0696	60.0586	80.0171	100.128
124.9	-40.1611	-31.189	-21.3013	-14.0381	-4.63867	6.34766	18.1885	30.3955	45.0439	68.7256	101.379	-100.128	-80.1086	-60.0891	-40.0085	-20.05	0	20.0195	40.0391	60.0586	80.1086	100.128
125	-40.1611	-31.189	-21.3013	-14.0381	-4.63867	6.34766	18.2495	30.3345	45.105	68.6035	101.44	-100.128	-80.1392	-60.0586	-40.0696	-20.05	30.5176	19.989	40.1001	60.0586	80.1086	100.128
125.1	-40.1611	-31.0669	-21.3013	-14.0381	-4.63867	6.34766	18.3105	30.2734	45.105	68.5425	101.501	-100.128	-80.1086	-60.0891	-40.0391	-20.0806	-30.5176	19.989	40.0391	60.0281	80.0781	100.037
125.2	-40.1611	-31.0059	-21.3623	-14.0381	-4.63867	6.28662	18.2495	30.3345	45.105	68.6035	101.624	-100.098	-80.1086	-60.0586	-40.0696	-20.0195	-30.5176	19.989	39.917	59.967	80.0781	100.067
125.3	-40.1611	-30.9448	-21.4233	-14.0381	-4.63867	6.28662	18.1885	30.3955	45.0439	68.6645	101.685	-100.067	-80.1086	-60.1196	-40.1001	-19.989	-30.5176	19.989	40.0085	59.9976	80.0171	100.098
125.4	-40.2222	-30.8838	-21.4844	-14.0381	-4.63867	6.34766	18.0664	30.4565	44.9829	68.7256	101.746	-100.128	-80.0781	-60.0586	-40.0391	-19.989	0	19.989	40.0696	59.9976	80.0476	100.098
125.5	-40.2222	-30.8228	-21.6064	-13.977	-4.57764	6.34766	18.0054	30.5176	44.9829	68.7866	101.746	-100.098	-80.1392	-59.9976	-40.0391	-20.0195	30.5176	20.0195	40.0696	60.0281	80.0781	100.098
125.6	-40.1611	-30.8838	-21.6064	-13.977	-4.5166	6.40869	18.0054	30.5176	44.9829	68.8477	101.685	-100.067	-80.1086	-60.0586	-40.0696	-19.989	30.5176	20.0195	40.0696	60.0586	80.1392	100.098
125.7	-40.1611	-30.9448	-21.6064	-13.977	-4.5166	6.40869	18.0054	30.4565	44.9219	68.7866	101.685	-100.128	-80.0781	-60.0586	-40.1306	-19.989	0	19.9585	40.0085	60.0281	80.1086	100.098
125.8	-40.1001	-30.9448	-21.5454	-14.0381	-4.5166	6.40869	18.0054	30.3345	44.8608	68.7866	101.685	-100.159	-80.0781	-60.0891	-40.1611	-19.9585	-30.5176	19.9585	40.0085	59.9976	80.0171	100.067
125.9	-40.0391	-30.8838	-21.5454	-14.0381	-4.5166	6.34766	18.0054	30.2734	44.7998	68.7256	101.685	-100.159	-80.0781	-60.1501	-40.1306	-19.9585	-61.0352	19.989	40.0085	60.0586	80.0476	100.098
126	-40.0391	-30.7617	-21.4844	-14.0381	-4.57764	6.28662	18.0054	30.2124	44.7998	68.7256	101.685	-100.067	-80.1086	-60.0891	-40.1001	-20.0806	0	20.05	40.0391	60.0281	80.0781	100.098
126.1	-40.0391	-30.7617	-21.4844	-13.977	-4.57764	6.22559	18.0054	30.1514	44.7998	68.7256	101.624	-100.067	-80.1086	-60.0281	-40.0391	-20.05	0	20.0806	40.0696	60.0586	80.0476	100.128
126.2	-40.1001	-30.7617	-21.4844	-13.855	-4.57764	6.16455	18.0054	30.1514	44.7388	68.7256	101.562	-100.098	-80.0781	-60.0281	-40.0391	-20.0195	30.5176	20.0195	40.0085	59.9976	80.0781	100.098
126.3	-40.1611	-30.7617	-21.4233	-13.855	-4.63867	6.16455	17.9443	30.2124	44.7388	68.7866	101.501	-100.128	-80.0781	-60.0586	-40.1001	-19.989	-30.5176	19.989	40.0085	59.9976	79.9866	100.159
126.4	-40.1611	-30.7007	-21.4233	-13.916	-4.69971	6.10352	17.9443	30.2734	44.7998	68.7866	101.379	-100.128	-80.0476	-60.0891	-40.0391	-19.989	-30.5176	20.05	40.0696	59.9976	80.0171	100.128
126.5	-40.2222	-30.7007	-21.3623	-13.977	-4.76074	6.16455	17.9443	30.2124	44.7998	68.7256	101.379	-100.159	-80.0781	-60.0891	-40.0696	-19.989	-61.0352	19.989	40.1001	60.0281	80.1086	100.128
126.6	-40.2832	-30.6396	-21.3013	-14.0381	-4.82178	6.16455	17.9443	30.1514	44.7998	68.7256	101.318	-100.189	-80.0781	-60.0891	-40.0696	-20.05	0	19.9585	40.1001	60.0891	80.1086	100.098
126.7	-40.3442	-30.6396	-21.3013	-13.977	-4.82178	6.22559	17.9443	30.0293	44.7998	68.6645	101.379	-100.067	-80.0781	-60.0586	-40.0696	-20.0806	-61.0352	19.989	40.0391	60.0586	80.1392	100.037
126.8	-40.3442	-30.6396	-21.3623	-13.977	-4.69971	6.28662	17.9443	29.9683	44.7998	68.6645	101.44	-100.128	-80.1086	-60.0281	-40.1001	-20.0195	-30.5176	19.9585	40.0085	59.9976	80.1086	100.067
126.9	-40.4053	-30.6396	-21.3623	-13.916	-4.63867	6.34766	17.9443	30.0293	44.7998	68.7256	101.562	-100.128	-80.0781	-60.0891	-40.1001	-20.0195	-61.0352	19.989	39.978	59.9365	80.0476	100.037
127	-40.4053	-30.7007	-21.3623	-13.916	-4.57764	6.34766	17.9443	30.0293	44.7998	68.8477	101.624	-100.128	-80.0781	-60.0891	-40.0391	-19.989	-30.5176	19.989	39.978	59.967	80.0476	100.098
127.1	-40.3442	-30.7007	-21.3623	-13.916	-4.57764	6.34766	17.9443	30.0293	44.7998	68.9087	101.685	-100.037	-80.1086	-60.0586	-40.0391	-19.989	-61.0352	20.05	40.0391	60.0281	80.0171	100.128
127.2	-40.2832	-30.7007	-21.3623	-13.977	-4.63867	6.28662	17.9443	30.0903	44.8608	68.9697	101.807	-100.159	-80.0171	-60.0586	-40.0696	-19.989	30.5176	20.0195	40.0696	60.0586	80.1086	100.098
127.3	-40.2222	-30.7007	-21.3623	-13.977	-4.76074	6.28662	17.9443	30.1514	44.9219	69.0308	101.868	-100.159	-80.0476	-60.0586	-40.0696	-20.05	30.5176	20.0195	40.1001	60.0891	80.1392	100.098
127.4	-40.2222	-30.7007	-21.3013	-13.855	-4.82178	6.28662	18.0054	30.1514	44.9219	68.9697	101.99	-100.159	-80.0781	-60.0586	-40.0696	-20.05	30.5176	19.989	40.0391	60.0281	80.0781	100.067
127.5	-40.1611	-30.7007	-21.3013	-13.7939	-4.82178	6.34766	17.9443	30.1514	44.9829	68.9697	102.051	-100.159	-80.0476	-60.0891	-40.0696	-20.05	-30.5176	19.989	39.978	59.9976	80.0171	100.098
127.6	-40.1001	-30.6396	-21.3013	-13.7329	-4.82178	6.40869	18.0054	30.1514	44.9829	68.9087	102.051	-100.098	-80.0781	-60.0891	-40.0391	-19.989	-30.5176	19.9585	40.0085	59.9976	80.0476	100.098
127.7	-40.0391	-30.7007	-21.3013	-13.6719	-4.82178	6.46973	18.0054	30.2124	44.9829	68.8477	101.929	-100.098	-80.1392	-60.0586	-40.0696	-19.989	30.5176	20.0195	40.0391	59.9976	80.0781	100.037
127.8	-40.0391	-30.6396	-21.3623	-13.6108	-4.82178	6.53076	18.0054	30.1514	44.9829	68.7256	101.746	-100.128	-80.0781	-60.0891	-40.0391	-20.0195	61.0352	20.0195	40.0085	60.0281	80.0476	100.098
127.9	-40.1001	-30.5786	-21.4233	-13.6108	-4.82178	6.53076	18.0054	30.1514	44.9829	68.6035	101.624	-100.128	-80.0476	-60.0586	-40.0085	-20.0195	0	19.989	39.978	60.0281	80.0476	100.098
128	-40.1001	-30.6396	-21.4844	-13.6719	-4.69971	6.53076	17.9443	30.1514	44.9219	68.5425	101.562	-100.159	-80.1086	-60.0586	-40.0391	-20.0195	0	19.989	39.9475	60.0281	80.0476	100.067
128.1	-40.0391	-30.7007	-21.5454	-13.7329	-4.63867	6.53076	18.0054	30.0903	44.8608	68.4814	101.501	-100.128	-80.1086	-60.0891	-40.0391	-20.0195	-30.5176	20.0195	40.0085	59.9976	80.0476	100.098
128.2	-39.978	-30.7007	-21.5454	-13.855	-4.63867	6.46973	18.0054	30.0293	44.8608	68.5425	101.501	-100.128	-80.0781	-60.0586	-40.0391	-20.0195	-30.5176	19.989	40.0696	60.0586	80.0171	100.098
128.3	-39.917	-30.6396	-21.4233	-13.916	-4.82178	6.40869	18.0664	30.0293	44.8608	68.6645	101.562	-100.128	-80.1392	-60.1196	-40.0696	-20.0806	30.5176	19.989	40.0391	60.0586	80.0476	100.128
128.4	-39.978	-30.6396	-21.3013	-13.7939	-4.94385	6.34766	18.0664	30.0293	44.9219	68.7866	101.624	-100.098	-80.0781	-60.0891	-40.0696	-20.0195	0	20.0195	40.1001	60.0586	80.0781	100.098
128.5	-39.978	-30.6396	-21.2402	-13.7329	-4.94385	6.28662	18.1274	30.0293	44.9829	68.9087	101.624	-100.128	-80.1392	-60.1196	-40.0085	-19.989	30.5176	20.05	39.978	60.0586	80.0781	100.098
128.6	-40.0391	-30.6396	-21.3013	-13.6719	-4.88281	6.28662	18.1274	30.0293	44.9829	68.9697	101.746	-100.098	-80.1086	-60.1196	-40.0391	-20.05	30.5176	19.9585	39.978	60.0281	80.0171	100.067
128.7	-40.0391	-30.6396	-21.4844	-13.6719	-4.82178	6.34766	18.1274	29.9683	44.9829	68.9697	101.807	-100.098	-80.0781	-60.0586	-39.978	-19.989	-30.5176	20.0195	40.0085	59.9976	80.0476	100.098
128.8	-40.1001	-30.6396	-21.6064	-13.6108	-4.82178	6.34766	18.2495	30.0293	44.9829	68.9697	101.868	-100.098	-80.1392	-60.0891	-40.0085	-20.0195	-30.5176	19.989	39.978	59.9976	80.0476	100.098
128.9	-40.1611	-30.5786	-21.6675	-13.5498	-4.76074	6.34766	18.3105	30.1514	44.9219	68.8477	101.929	-100.098	-80.0476	-60.0891	-40.0391	-19.989	30.5176	20.0195	40.0391	60.0586	80.0781	100.098
129	-40.2832	-30.4565	-21.6675	-13.4888	-4.69971	6.40869	18.2495	30.2734	44.9219	68.6645	101.929	-100.128	-80.0781	-60.0586	-40.0391	-20.05	-30.5176	19.989	40.0696	60.0586	80.1392	100.189
129.1	-40.3442	-30.3955	-21.6064	-13.4888	-4.69971	6.40869	18.1274	30.3345	45.0439	68.6035	101.807	-100.159	-80.1086	-60.0891	-40.0391	-20.0806	0	19.9585	40.0696	60.0586	80.0476	100.098
129.2	-40.4053	-30.4565	-21.4844	-13.5498	-4.76074	6.40869	18.0054	30.3955	45.105	68.6035	101.685	-100.128	-80.1086	-60.0586	-40.1001	-20.05	-30.5176	20.0195	40.0391	60.0586	80.0476	100.098
129.3	-40.4053	-30.5176	-21.4233	-13.5498	-4.82178	6.40869	17.9443	30.3955	45.0439	68.6645	101.685	-100.128	-80.1697	-60.1196	-40.0696	-20.05	-30.5176	20.0195	40.0085	60.0586	80.0171	100.037
129.4	-40.5273	-30.6396	-21.3623	-13.6108	-4.88281	6.34766	17.8833	30.3955	44.9829	68.7866	101.807	-100.128	-80.1392	-60.0891	-40.0391	-19.989	-30.5176	19.989	40.0391	60.0586	80.0171	100.098
129.5	-40.5884	-30.7007	-21.3623	-13.6108	-4.88281	6.28662	17.9443	30.3345	44.9219	68.7866	101.868	-100.128	-80.1086	-60.0891	-40.0696	-19.989	0	19.989	40.0391	59.9976	80.0476	100.159
129.6	-40.6494	-30.7617	-21.3013	-13.5498	-4.88281	6.28662	18.0054	30.3345	44.7998	68.7256	101.99	-100.098	-80.1392	-60.0586	-40.0696	-20.0195	30.5176	20.0195	40.0391	60.0586	80.0781	100.128
129.7	-40.5884	-30.8228	-21.3013	-13.5498	-4.88281	6.34766	18.0054	30.2734	44.7388	68.7256	101.99	-100.159	-80.1086	-60.0586	-40.0696	-20.05	0	20.0195	40.0696	60.0281	80.0171	100.098
129.8	-40.5273	-30.8228	-21.2402	-13.5498	-4.88281	6.34766	18.0664	30.2734	44.7388	68.7256	101.929	-100.189	-80.0476	-60.0891	-40.0696	-20.0806	-30.5176	19.9585	40.0391	60.0586	80.0476	100.128
129.9	-40.4663	-30.8228	-21.1792	-13.5498	-4.88281	6.34766	18.0664	30.2124	44.7388	68.6645	101.868	-100.159	-80.1392	-60.0586	-40.0391	-20.05	0	19.989	40.1001	60.0586	80.0476	100.037
130	-40.4053	-30.7617	-21.1182	-13.6108	-4.88281	6.40869	18.0664	30.1514	44.7388	68.5425	101.868	-100.159	-80.0781	-60.0891	-40.0696	-20.05	-61.0352	19.928	40.0391	60.0281	80.0781	100.098
130.1	-40.4663	-30.6396	-21.1182	-13.6108	-4.88281	6.34766	18.0664	30.1514	44.7388	68.4204	101.868	-100.128	-80.1086	-60.1196	-40.0391	-20.0195	-30.5176	19.989	40.0391	60.0586	80.0476	100.037
130.2	-40.5273	-30.6396	-21.1182	-13.6719	-4.88281	6.34766	18.0054	30.1514	44.7998	68.4204	101.99	-100.098	-80.1086	-60.1196	-40.0696	-20.0195	0	19.9585	40.0391	59.967	80.0476	100.098
130.3	-40.5884	-30.6396	-21.1182	-13.7329	-4.82178	6.34766	18.0054	30.2734	44.7998	68.4204	102.051	-100.128	-80.1697	-60.0891	-40.0391	-20.0195	30.5176	20.0195	39.978	60.0586	80.0781	100.128
130.4	-40.5884	-30.7617	-21.2402	-13.7939	-4.82178	6.34766	17.9443	30.3345	44.7998	68.4814	102.051	-100.128	-80.0781	-60.0586	-40.0085	-20.0806	0	20.0195	40.0696	60.0586	80.0171	100.037
130.5	-40.5884	-30.8228	-21.2402	-13.855	-4.76074	6.34766	17.9443	30.3345	44.8608	68.5425	102.051	-100.159	-80.0781	-59.9976	-40.0696	-19.989	-30.5176	19.989	40.0085	60.0586	80.1086	100.098
130.6	-40.5884	-30.9448	-21.2402	-13.7939	-4.76074	6.28662	17.9443	30.3345	44.8608	68.5425	101.929	-100.159	-80.0781	-60.0586	-40.0696	-19.989	0	20.0195	40.0391	60.1196	80.0476	100.128
130.7	-40.5884	-31.0669	-21.1792	-13.7939	-4.82178	6.22559	17.9443	30.3345	44.9219	68.6035	101.746	-100.159	-80.0781	-60.0586	-40.1001	-20.0195	-30.5176	19.9585	40.0085	60.0281	80.0781	100.128
130.8	-40.5273	-31.1279	-21.1182	-13.6719	-4.82178	6.28662	17.8833	30.3955	44.9829	68.6035	101.685	-100.189	-80.0781	-60.0891	-40.0391	-19.989	0	19.989	40.0391	60.0891	80.0476	100.098
130.9	-40.4663	-31.189	-21.0571	-13.6719	-4.88281	6.34766	17.7612	30.4565	45.0439	68.6645	101.685	-100.189	-80.0476	-60.0586	-40.1306	-20.0195	-30.5176	19.989	39.9475	60.0281	80.0171	100.098
131	-40.4663	-31.1279	-21.0571	-13.6719	-4.94385	6.40869	17.8223	30.3955	45.105	68.6645	101.685	-100.128	-80.0781	-60.0586	-40.0391	-20.1111	-30.5176	19.9585	40.0085	60.0586	80.0171	100.037
131.1	-40.5884	-31.0669	-21.1182	-13.7329	-5.00488	6.40869	17.8223	30.3955	45.166	68.6035	101.624	-100.128	-80.0781	-60.0891	-40.0696	-20.0195	-30.5176	19.9585	39.9475	60.0891	80.0476	100.098
131.2	-40.6494	-31.0059	-21.1792	-13.855	-5.00488	6.34766	17.8833	30.3345	45.166	68.5425	101.562	-100.128	-80.0781	-60.0586	-40.0391	-20.0195	-61.0352	19.9585	39.978	60.0586	80.0476	100.067
131.3	-40.6494	-31.0059	-21.1792	-13.855	-5.00488	6.22559	17.8833	30.3345	45.166	68.5425	101.562	-100.128	-80.0781	-60.0586	-40.0085	-20.0195	30.5176	19.989	39.978	60.0586	80.0476	100.159
131.4	-40.7104	-31.0059	-21.2402	-13.7939	-5.00488	6.22559	17.9443	30.3955	45.105	68.5425	101.624	-100.159	-80.1392	-60.0891	-40.1001	-20.05	-30.5176	19.9585	40.0391	60.0891	80.0476	100.128
131.5	-40.7715	-30.9448	-21.2402	-13.7939	-5.00488	6.22559	17.8833	30.3955	45.0439	68.5425	101.685	-100.159	-80.1086	-60.0891	-40.0391	-20.1416	0	19.928	39.978	60.1196	80.0781	100.128
131.6	-40.8936	-30.9448	-21.1182	-13.7329	-5.00488	6.22559	17.8833	30.4565	44.9829	68.5425	101.746	-100.189	-80.0781	-60.0586	-40.0696	-20.0806	-30.5176	19.8975	40.0085	60.0891	80.0476	100.067
131.7	-40.8936	-30.9448	-20.9961	-13.7329	-4.94385	6.22559	17.8833	30.4565	44.9829	68.5425	101.807	-100.159	-80.0781	-60.1196	-40.0696	-19.989	-61.0352	19.989	39.978	60.0586	80.0781	100.098
131.8	-40.9546	-30.9448	-20.874	-13.7329	-4.88281	6.22559	17.8833	30.3955	44.9829	68.5425	101.868	-100.159	-80.1086	-60.0586	-40.0391	-19.989	-30.5176	19.9585	40.0085	60.0281	80.0171	100.067
131.9	-41.0156	-30.9448	-20.813	-13.7329	-4.76074	6.22559	17.8833	30.3955	45.0439	68.4814	101.868	-100.159	-80.1392	-60.0586	-40.0391	-20.05	0	19.989	39.978	60.0586	80.0476	100.128
132	-41.0767	-31.0059	-20.813	-13.6719	-4.69971	6.34766	17.9443	30.3345	45.105	68.4204	101.868	-100.159	-80.1086	-60.0586	-40.0085	-20.05	30.5176	19.989	39.978	60.1501	80.0781	100.128
132.1	-41.1987	-31.0059	-20.813	-13.6719	-4.69971	6.40869	18.0054	30.3345	45.166	68.4204	101.868	-100.189	-80.0781	-60.0891	-40.0085	-20.0806	0	19.9585	39.978	60.0891	80.1086	100.128
132.2	-41.1377	-31.0059	-20.9351	-13.6719	-4.76074	6.46973	18.0664	30.3345	45.227	68.4204	101.929	-100.128	-80.0781	-60.0586	-40.0696	-20.05	0	19.9585	39.9475	60.0586	80.0781	100.128
132.3	-41.0767	-30.9448	-20.9351	-13.7329	-4.76074	6.46973	18.0664	30.3345	45.2881	68.4814	101.929	-100.189	-80.0476	-60.0891	-40.0696	-20.0195	-91.5527	19.8975	39.978	60.0891	80.0476	100.098
132.4	-41.0767	-30.9448	-20.9961	-13.7329	-4.82178	6.46973	18.1274	30.3345	45.2881	68.5425	101.929	-100.128	-80.0781	-60.0891	-40.0696	-20.05	-61.0352	19.9585	39.9475	60.0586	80.0171	100.159
132.5	-41.1377	-30.9448	-20.9961	-13.7329	-4.82178	6.40869	18.1274	30.3345	45.3491	68.5425	101.929	-100.159	-80.1392	-60.1196	-40.0085	-20.05	0	19.989	40.0391	60.1196	80.0476	100.128
132.6	-41.2598	-30.9448	-21.0571	-13.7329	-4.76074	6.28662	18.0664	30.3345	45.4102	68.5425	101.99	-100.128	-80.1697	-60.0586	-40.1001	-20.0806	-30.5176	19.928	40.0085	60.1196	80.0781	100.098
132.7	-41.3818	-30.9448	-21.0571	-13.7329	-4.76074	6.22559	18.0054	30.3345	45.4102	68.5425	102.051	-100.128	-80.1392	-60.1501	-40.0391	-20.0806	0	19.9585	39.9475	60.0281	80.0171	100.128
132.8	-41.4429	-30.9448	-21.0571	-13.7329	-4.69971	6.16455	17.9443	30.3345	45.2881	68.5425	102.112	-100.159	-80.1086	-60.0586	-40.0391	-19.989	-61.0352	19.9585	39.9475	60.0281	80.0476	100.098
132.9	-41.5039	-30.9448	-21.0571	-13.7329	-4.69971	6.22559	17.9443	30.3345	45.227	68.5425	102.112	-100.189	-80.0781	-60.1501	-40.0391	-20.0195	-30.5176	19.989	39.9475	60.0281	79.9561	100.098
133	-41.5039	-31.0059	-21.1792	-13.6719	-4.76074	6.22559	17.9443	30.3345	45.227	68.5425	102.051	-100.159	-80.1086	-60.1196	-40.0391	-19.9585	30.5176	19.989	40.0391	60.0891	80.0171	100.098
133.1	-41.5039	-31.0669	-21.2402	-13.6108	-4.82178	6.22559	17.9443	30.3345	45.2881	68.6035	101.929	-100.159	-80.0781	-60.0891	-40.0696	-20.05	0	19.989	40.0391	60.1807	80.0476	100.128
133.2	-41.5039	-31.1279	-21.3013	-13.5498	-4.82178	6.16455	17.9443	30.3955	45.3491	68.6645	101.868	-100.159	-80.1392	-60.0586	-40.1001	-20.0806	30.5176	19.9585	40.0085	60.0586	80.0171	100.128
133.3	-41.4429	-31.1279	-21.3013	-13.4888	-4.88281	6.10352	17.9443	30.3955	45.4712	68.7866	101.746	-100.159	-80.0781	-60.0586	-40.0391	-20.0806	-30.5176	19.9585	40.0085	60.0891	80.0781	100.128
133.4	-41.5039	-31.1279	-21.3013	-13.4888	-4.94385	6.16455	17.9443	30.3955	45.5322	68.7866	101.746	-100.159	-80.0476	-60.0891	-40.0391	-20.0195	0	19.8975	39.978	60.0586	80.0781	100.067
133.5	-41.5039	-31.0669	-21.2402	-13.5498	-5.00488	6.22559	18.0054	30.3955	45.5322	68.7256	101.746	-100.159	-80.1086	-60.0891	-40.0085	-19.989	-30.5176	19.9585	39.978	60.0891	79.9866	100.128
133.6	-41.5649	-30.9448	-21.2402	-13.6108	-5.00488	6.28662	18.0664	30.3955	45.5322	68.6035	101.807	-100.189	-80.1392	-60.0586	-40.0085	-19.989	-30.5176	20.05	40.1001	60.0891	80.0171	100.159
133.7	-41.5039	-30.8228	-21.2402	-13.6108	-4.88281	6.40869	18.1885	30.3955	45.5322	68.5425	101.868	-100.128	-80.1392	-60.0281	-40.0391	-20.0806	30.5176	19.9585	40.0391	60.1196	80.0476	100.159
133.8	-41.5039	-30.7617	-21.1792	-13.6719	-4.82178	6.46973	18.1885	30.4565	45.5322	68.5425	101.868	-100.189	-80.1697	-60.0586	-40.0696	-20.0806	-30.5176	19.989	40.0391	60.0891	80.0781	100.128
133.9	-41.5039	-30.7007	-21.1792	-13.6719	-4.76074	6.46973	18.2495	30.4565	45.5322	68.5425	101.929	-100.159	-80.1086	-60.0891	-40.0391	-20.05	-30.5176	19.989	39.978	60.0891	80.0476	100.098
134	-41.5039	-30.7007	-21.1182	-13.6719	-4.76074	6.46973	18.2495	30.3955	45.5322	68.6035	101.929	-100.189	-80.0781	-60.1196	-40.0391	-20.0195	-61.0352	19.9585	40.0391	59.9976	80.0476	100.128
134.1	-41.5039	-30.7007	-21.1792	-13.6719	-4.82178	6.40869	18.2495	30.3345	45.5322	68.7256	101.929	-100.159	-80.1086	-60.1196	-40.0696	-20.05	-30.5176	19.9585	39.978	60.0891	80.0171	100.098
134.2	-41.5039	-30.7007	-21.1792	-13.6719	-4.88281	6.34766	18.2495	30.2734	45.5933	68.7866	101.868	-100.159	-80.1086	-60.0586	-40.0391	-20.0806	-30.5176	19.989	40.0391	60.0586	80.0781	100.128
134.3	-41.5039	-30.7007	-21.1792	-13.6108	-4.94385	6.28662	18.3105	30.2734	45.5933	68.8477	101.746	-100.159	-80.1086	-60.0586	-40.0696	-20.0806	0	19.989	40.0391	60.0891	80.0781	100.128
134.4	-41.5649	-30.6396	-21.1792	-13.6108	-4.94385	6.28662	18.3105	30.2734	45.5322	68.9087	101.746	-100.128	-80.1392	-60.0586	-40.0391	-20.05	-30.5176	19.9585	39.978	60.0281	80.0476	100.098
134.5	-41.5039	-30.6396	-21.1792	-13.5498	-4.94385	6.34766	18.2495	30.2734	45.4712	69.0308	101.807	-100.159	-80.0781	-60.0586	-40.0391	-19.989	-30.5176	19.989	40.0085	60.0281	80.0476	100.067
134.6	-41.5039	-30.5786	-21.2402	-13.4888	-4.88281	6.34766	18.1885	30.3345	45.4712	69.0918	101.868	-100.189	-80.0476	-60.1196	-40.0696	-19.928	-30.5176	19.989	40.0085	60.1196	79.9866	100.098
134.7	-41.4429	-30.5786	-21.3013	-13.4888	-4.88281	6.34766	18.1885	30.3955	45.5322	69.0918	101.868	-100.159	-80.0781	-60.1196	-40.1001	-20.0195	0	19.989	40.0391	60.0891	80.0171	100.159
134.8	-41.3208	-30.5786	-21.3013	-13.4277	-4.88281	6.34766	18.1885	30.3955	45.5933	69.1528	101.807	-100.128	-80.1392	-60.0586	-40.1001	-20.0806	-61.0352	19.9585	40.0391	60.1807	80.0476	100.128
134.9	-41.1987	-30.5786	-21.2402	-13.4277	-4.88281	6.28662	18.2495	30.4565	45.5933	69.2139	101.807	-100.128	-80.1392	-60.0891	-40.0391	-20.0806	0	19.928	39.978	60.1196	80.0476	100.098
135	-41.1377	-30.5786	-21.1182	-13.4277	-4.94385	6.22559	18.3105	30.5176	45.5933	69.2749	101.807	-100.128	-80.1086	-60.0891	-40.0696	-20.0806	-61.0352	19.9585	39.978	60.1196	80.0476	100.098
135.1	-41.0767	-30.5786	-21.0571	-13.5498	-5.00488	6.16455	18.3716	30.5786	45.5933	69.3359	101.868	-100.189	-80.0781	-60.1196	-40.1001	-20.0195	-61.0352	19.928	40.0085	60.0586	79.9866	100.037
135.2	-41.1377	-30.5786	-20.9961	-13.6108	-5.06592	6.04248	18.3716	30.5786	45.5933	69.3359	101.929	-100.128	-80.1392	-60.0891	-40.0696	-20.0806	-61.0352	19.9585	40.0391	60.1196	79.9866	100.098
135.3	-41.1987	-30.5786	-20.9961	-13.6719	-5.06592	5.98144	18.4326	30.5786	45.7153	69.3359	101.929	-100.098	-80.1086	-60.0281	-40.0391	-20.05	0	20.0195	40.0085	60.1196	80.0476	100.159
135.4	-41.1987	-30.5176	-21.0571	-13.7329	-5.00488	6.04248	18.4326	30.4565	45.7153	69.397	101.929	-100.128	-80.1086	-60.0586	-40.1001	-20.05	0	19.989	40.0085	60.1501	80.0476	100.128
135.5	-41.1377	-30.4565	-21.0571	-13.7329	-5.00488	6.10352	18.4326	30.3955	45.7153	69.397	101.807	-100.128	-80.0781	-60.0891	-40.1001	-20.0806	0	19.9585	39.978	60.0891	80.0476	100.098
135.6	-41.0156	-30.4565	-21.1182	-13.7939	-5.00488	6.16455	18.4326	30.3345	45.6543	69.458	101.746	-100.189	-80.0781	-60.0891	-40.1306	-20.05	-30.5176	19.928	40.0085	60.0281	80.0781	100.098
135.7	-40.9546	-30.4565	-21.1792	-13.7939	-5.00488	6.22559	18.4326	30.3345	45.6543	69.519	101.746	-100.128	-80.0781	-60.0891	-40.0696	-19.989	-30.5176	19.8975	40.0085	60.0891	80.0476	100.067
135.8	-40.8936	-30.4565	-21.1792	-13.7939	-5.06592	6.22559	18.4326	30.3345	45.6543	69.5801	101.746	-100.189	-80.0781	-60.1196	-40.0085	-20.05	-30.5176	19.928	40.0085	60.0891	80.0476	100.067
135.9	-40.8325	-30.4565	-21.2402	-13.7939	-5.06592	6.22559	18.4326	30.3955	45.7153	69.5801	101.807	-100.128	-80.1086	-60.0586	-40.0696	-20.05	-30.5176	20.0195	40.0085	60.0586	80.0171	100.098
136	-40.7104	-30.4565	-21.3013	-13.855	-5.06592	6.16455	18.4326	30.4565	45.7153	69.458	101.807	-100.128	-80.1392	-59.9976	-40.0391	-20.0195	-30.5176	20.0195	40.0391	60.0586	80.0781	100.037
136.1	-40.5884	-30.3955	-21.3013	-13.855	-5.06592	6.16455	18.4326	30.5176	45.7153	69.3359	101.868	-100.159	-80.1086	-60.0281	-40.1001	-19.989	30.5176	19.9585	40.0391	60.0281	80.0476	100.098
136.2	-40.6494	-30.3955	-21.2402	-13.855	-5.00488	6.16455	18.4326	30.5786	45.7153	69.1528	101.99	-100.159	-80.0781	-60.0586	-40.0696	-20.05	-30.5176	19.928	39.9475	60.0586	80.0476	100.128
136.3	-40.7715	-30.5176	-21.1182	-13.855	-4.94385	6.22559	18.3716	30.5786	45.5933	69.0308	102.112	-100.159	-80.0781	-60.0586	-40.1001	-20.0195	-30.5176	19.9585	39.978	60.0281	80.0781	100.128
136.4	-40.8936	-30.6396	-21.1182	-13.7329	-4.82178	6.22559	18.3716	30.5786	45.4712	68.9697	102.173	-100.189	-80.0476	-60.0891	-40.0696	-20.05	0	19.9585	40.0391	60.1196	80.0781	100.128
136.5	-40.8936	-30.7617	-21.2402	-13.7329	-4.76074	6.28662	18.4326	30.5786	45.4102	68.9087	102.173	-100.128	-80.0476	-60.0281	-40.0696	-20.1111	-61.0352	19.928	40.0085	60.0891	80.0781	100.098
136.6	-40.7715	-30.7617	-21.3623	-13.7939	-4.76074	6.40869	18.4326	30.5786	45.2881	68.9087	102.112	-100.128	-80.0781	-60.0891	-40.0391	-20.0806	-30.5176	20.05	40.0085	60.0586	80.0476	100.098
136.7	-40.6494	-30.7617	-21.4233	-13.855	-4.88281	6.46973	18.4326	30.5176	45.227	68.9087	101.99	-100.128	-80.1086	-60.0891	-40.0696	-20.0806	0	19.989	39.978	60.0586	80.0171	100.067
136.8	-40.5273	-30.6396	-21.4844	-13.916	-4.94385	6.40869	18.5547	30.5176	45.105	68.9087	101.929	-100.128	-80.0781	-60.0586	-40.0391	-20.05	-30.5176	19.9585	39.9475	60.0281	80.0171	100.067
136.9	-40.4663	-30.5786	-21.5454	-13.916	-4.94385	6.22559	18.4937	30.6396	45.0439	68.8477	101.868	-100.128	-80.0781	-60.0586	-40.0696	-19.989	30.5176	19.989	39.978	60.0281	80.0171	100.189
137	-40.5273	-30.5176	-21.5454	-13.977	-4.94385	6.10352	18.4326	30.6396	45.0439	68.8477	101.929	-100.098	-80.0781	-60.1196	-40.0391	-19.9585	30.5176	19.989	40.0085	60.0281	80.0476	100.098
137.1	-40.5273	-30.5176	-21.5454	-13.977	-4.94385	6.04248	18.3105	30.5176	45.0439	68.8477	102.051	-100.128	-80.0781	-60.0891	-40.0085	-20.05	30.5176	20.0195	40.0085	60.0891	80.0781	100.128
137.2	-40.5273	-30.5176	-21.4844	-13.855	-4.88281	5.98144	18.1885	30.3345	44.9829	68.9087	102.112	-100.128	-80.1086	-60.0586	-40.0085	-20.0195	0	20.0195	40.0391	60.0586	80.0171	100.128
137.3	-40.5273	-30.4565	-21.4844	-13.7939	-4.88281	6.04248	18.1885	30.2734	44.9829	68.9087	102.112	-100.128	-80.0781	-60.0891	-40.0391	-20.05	30.5176	19.9585	40.0085	60.0891	80.0476	100.067
137.4	-40.5273	-30.4565	-21.4233	-13.7939	-4.88281	6.04248	18.2495	30.2124	44.9829	68.9087	101.99	-100.159	-80.1086	-60.0891	-40.0391	-20.0195	-30.5176	19.989	40.0085	60.0586	80.0171	100.098
137.5	-40.4663	-30.3955	-21.3623	-13.7939	-4.88281	6.16455	18.3716	30.2124	44.9219	68.9697	101.746	-100.098	-80.1392	-60.1196	-40.0391	-20.05	0	19.989	40.0696	59.9976	80.0171	100.098
137.6	-40.4663	-30.3955	-21.3623	-13.855	-4.88281	6.22559	18.4937	30.3345	44.9219	69.0918	101.562	-100.159	-80.1392	-60.0586	-40.0391	-20.0195	0	20.0195	40.0085	59.9976	80.1086	100.098
137.7	-40.5273	-30.3345	-21.3013	-13.855	-4.94385	6.28662	18.5547	30.3955	44.9219	69.2139	101.44	-100.128	-80.1086	-60.0891	-40.0085	-20.0195	-30.5176	20.05	40.0085	60.0891	80.0476	100.098
137.8	-40.5884	-30.2734	-21.2402	-13.916	-4.88281	6.22559	18.4937	30.3955	44.9219	69.2749	101.379	-100.189	-80.0476	-60.0586	-40.0391	-20.0195	-30.5176	20.0195	40.0391	60.0281	80.0476	100.159
137.9	-40.6494	-30.2734	-21.2402	-13.855	-4.88281	6.22559	18.4326	30.3345	44.9829	69.2139	101.318	-100.128	-80.1086	-60.0891	-40.1001	-20.0195	0	20.0195	40.0085	60.0891	80.0781	100.128
138	-40.7104	-30.3345	-21.2402	-13.7329	-4.88281	6.16455	18.3716	30.3345	45.0439	69.1528	101.318	-100.22	-80.0476	-60.1196	-40.1001	-20.0195	91.5527	19.989	40.0085	60.0586	80.0476	100.098
138.1	-40.8325	-30.3345	-21.3013	-13.6719	-4.76074	6.10352	18.3105	30.2734	45.105	69.0308	101.379	-100.098	-80.0781	-60.1501	-40.0085	-20.05	-30.5176	20.0195	40.0391	60.0586	80.0476	100.098
138.2	-40.8936	-30.3345	-21.3623	-13.5498	-4.76074	6.10352	18.3105	30.2124	45.105	69.0308	101.379	-100.159	-80.1086	-60.0891	-40.0696	-20.0806	-30.5176	20.0195	40.1001	60.0891	80.0476	100.189
138.3	-40.9546	-30.2734	-21.4844	-13.5498	-4.69971	6.10352	18.3105	30.2124	45.0439	69.0308	101.501	-100.098	-80.1086	-60.1196	-40.0391	-20.0195	30.5176	19.989	40.0696	60.0586	80.0171	100.098
138.4	-40.8936	-30.1514	-21.5454	-13.6108	-4.63867	6.16455	18.4326	30.1514	44.9219	69.0918	101.501	-100.128	-80.1086	-60.0586	-40.0085	-20.05	-30.5176	19.989	40.0391	60.0891	80.0171	100.067
138.5	-40.8325	-30.0903	-21.5454	-13.6719	-4.63867	6.22559	18.4937	30.2124	44.8608	69.1528	101.562	-100.098	-80.1086	-60.1196	-40.0696	-19.989	0	19.989	40.0085	60.0281	79.9866	100.067
138.6	-40.8325	-30.0293	-21.6064	-13.7329	-4.69971	6.22559	18.5547	30.2124	44.7998	69.2139	101.562	-100.128	-80.0476	-60.0586	-40.0696	-20.0195	0	20.05	40.0085	60.0891	80.0476	100.098
138.7	-40.7715	-29.9683	-21.6064	-13.7939	-4.82178	6.22559	18.5547	30.1514	44.8608	69.2139	101.562	-100.098	-80.1086	-60.0586	-40.0391	-20.0195	30.5176	19.989	40.0085	60.0586	80.1086	100.159
138.8	-40.7715	-29.9072	-21.5454	-13.855	-4.88281	6.22559	18.4937	30.0903	44.8608	69.1528	101.624	-100.159	-80.0781	-60.0891	-40.0696	-19.989	-30.5176	19.989	40.0085	60.0586	80.1086	100.128
138.9	-40.7104	-29.9683	-21.4233	-13.855	-4.94385	6.28662	18.4326	29.9683	44.8608	69.2139	101.624	-100.098	-80.1086	-60.0891	-40.0391	-20.0195	-61.0352	19.9585	40.1306	59.9976	80.0476	100.098
139	-40.6494	-30.0293	-21.3013	-13.855	-4.94385	6.34766	18.3716	29.9072	44.8608	69.2139	101.624	-100.128	-80.0781	-60.0586	-40.0696	-19.9585	-30.5176	19.989	39.978	60.0891	80.0476	100.037
139.1	-40.6494	-30.1514	-21.2402	-13.7939	-4.94385	6.40869	18.3716	29.8462	44.8608	69.2749	101.562	-100.098	-80.0781	-60.0891	-40.0696	-20.05	30.5176	20.05	40.0696	60.0586	80.0476	100.098
139.2	-40.6494	-30.2124	-21.2402	-13.7329	-5.00488	6.46973	18.3716	29.7852	44.9219	69.2749	101.44	-100.098	-80.0476	-60.0586	-40.0391	-19.989	-30.5176	19.989	39.978	60.0281	80.0476	100.098
139.3	-40.7104	-30.2124	-21.2402	-13.7939	-5.06592	6.40869	18.3716	29.7852	44.9219	69.3359	101.44	-100.128	-80.0781	-60.0891	-40.0391	-19.989	30.5176	19.989	39.978	60.0281	80.0476	100.098
139.4	-40.7104	-30.2124	-21.3013	-13.855	-5.06592	6.40869	18.3105	29.8462	44.9829	69.397	101.44	-100.098	-80.0476	-60.0586	-40.0391	-20.0195	-30.5176	20.0195	40.0391	60.0586	80.0171	100.098
139.5	-40.7104	-30.2124	-21.3623	-13.977	-5.12695	6.34766	18.2495	29.8462	44.9829	69.458	101.379	-100.128	-80.0781	-60.0891	-40.0696	-19.9585	0	20.0195	40.0391	60.0586	80.0476	100.159
139.6	-40.6494	-30.2124	-21.4233	-14.0381	-5.00488	6.34766	18.1885	29.9072	45.0439	69.458	101.318	-100.128	-80.0476	-60.0891	-40.0391	-20.05	-30.5176	20.0806	40.0696	60.1501	80.0781	100.128
139.7	-40.6494	-30.1514	-21.4844	-14.0381	-4.94385	6.34766	18.2495	29.9072	45.0439	69.458	101.318	-100.128	-80.0781	-60.0586	-40.1306	-20.0195	30.5176	19.9585	40.0696	60.0281	80.0781	100.067
139.8	-40.6494	-30.0903	-21.5454	-13.977	-4.88281	6.28662	18.2495	29.9072	45.0439	69.3359	101.318	-100.128	-80.0781	-60.0891	-40.0391	-20.0195	-61.0352	19.989	40.0391	60.1196	80.0781	100.067
139.9	-40.6494	-30.0293	-21.6064	-13.977	-4.82178	6.22559	18.3716	29.9072	45.0439	69.2139	101.379	-100.128	-80.0781	-60.0891	-40.0696	-20.0195	-30.5176	19.9585	40.0391	59.9976	80.0171	100.067
140	-40.5273	-29.9683	-21.6064	-13.916	-4.76074	6.16455	18.3716	29.9683	45.0439	69.1528	101.501	-100.067	-80.1697	-60.0891	-40.0391	-19.9585	-91.5527	20.0195	40.0391	60.0586	80.0171	100.098
140.1	-40.4053	-29.9683	-21.6064	-13.7939	-4.76074	6.22559	18.3716	30.0293	45.0439	69.0918	101.562	-100.098	-80.0781	-60.0586	-40.0391	-20.0195	0	20.1111	40.0696	60.0281	80.0171	100.067
140.2	-40.2832	-29.9683	-21.5454	-13.6719	-4.76074	6.28662	18.3716	30.0293	44.9829	69.0918	101.685	-100.098	-79.9866	-60.0586	-40.0696	-20.0195	30.5176	20.05	40.0696	60.0281	80.0476	100.067
140.3	-40.2222	-29.9683	-21.5454	-13.6719	-4.76074	6.28662	18.3105	30.0293	44.9219	69.1528	101.746	-100.159	-80.0476	-60.0891	-40.0391	-19.989	30.5176	19.989	40.0085	60.0281	80.0781	100.128
140.4	-40.1001	-30.0293	-21.5454	-13.6719	-4.76074	6.34766	18.3105	30.0903	44.9219	69.2749	101.685	-100.128	-79.9866	-60.1501	-40.0696	-19.989	30.5176	19.989	39.978	59.9365	80.0781	100.067
140.5	-40.1001	-30.0903	-21.4844	-13.7939	-4.76074	6.40869	18.3105	30.0903	44.9219	69.2749	101.624	-100.067	-80.0781	-60.1196	-40.0391	-19.989	0	19.9585	40.0696	59.9976	80.0781	100.037
140.6	-40.1001	-30.1514	-21.4233	-13.855	-4.82178	6.40869	18.3105	30.0293	44.9219	69.2139	101.44	-100.098	-80.0781	-60.0281	-40.0085	-19.989	0	19.9585	40.0696	59.9976	80.0476	100.037
140.7	-40.1001	-30.2124	-21.3013	-13.916	-4.82178	6.40869	18.3105	30.0293	44.9829	69.2139	101.257	-100.098	-80.0781	-60.0891	-40.0696	-20.05	0	20.0195	40.0696	60.0281	80.0476	100.098
140.8	-40.1001	-30.2734	-21.2402	-13.977	-4.82178	6.40869	18.3105	29.9683	45.105	69.1528	101.135	-100.128	-80.0781	-60.0891	-40.0391	-20.0806	30.5176	19.989	40.0696	59.9976	80.0781	100.128
140.9	-40.1001	-30.3345	-21.1792	-13.977	-4.88281	6.34766	18.4326	29.9072	45.105	69.2139	101.074	-100.128	-80.0781	-60.0586	-40.0696	-20.0195	0	19.989	39.978	60.0281	80.0476	100.037
141	-40.1611	-30.3955	-21.1792	-14.0381	-4.88281	6.28662	18.4937	29.8462	45.0439	69.2749	101.074	-100.098	-80.0781	-60.0586	-40.0085	-19.9585	0	19.989	39.978	59.9976	80.0476	100.067
141.1	-40.2222	-30.3955	-21.1792	-14.0381	-4.88281	6.22559	18.5547	29.7241	45.0439	69.2749	101.135	-100.037	-80.1086	-60.0891	-40.0085	-19.989	0	19.9585	40.0391	59.9976	80.0476	100.067
141.2	-40.2832	-30.3955	-21.2402	-14.0381	-4.94385	6.22559	18.5547	29.6631	45.0439	69.2749	101.257	-100.098	-80.0781	-60.0891	-40.0391	-19.989	30.5176	20.05	40.0696	60.0586	80.0781	100.067
141.3	-40.2222	-30.3345	-21.3013	-14.0381	-5.00488	6.28662	18.6157	29.6631	45.0439	69.2749	101.318	-100.128	-80.0781	-60.0891	-40.0696	-20.05	122.07	20.0195	40.1001	60.0891	80.1086	100.128
141.4	-40.2222	-30.2734	-21.3013	-14.0991	-5.00488	6.34766	18.5547	29.6631	44.9829	69.3359	101.318	-100.128	-80.0476	-60.1196	-40.1001	-20.0806	0	19.9585	40.0391	60.0281	80.0781	100.098
141.5	-40.1611	-30.2124	-21.3013	-14.0991	-5.00488	6.40869	18.5547	29.7852	44.9219	69.397	101.318	-100.098	-80.0476	-60.1196	-40.0391	-20.0195	0	19.9585	39.978	59.9976	80.0781	100.067
141.6	-40.2222	-30.1514	-21.3013	-14.0991	-4.94385	6.34766	18.5547	29.7852	44.9219	69.397	101.318	-100.067	-80.0781	-60.1196	-40.0391	-19.989	-30.5176	19.989	40.0085	59.967	80.0476	100.067
141.7	-40.2222	-30.0903	-21.3013	-14.0991	-4.94385	6.28662	18.5547	29.7241	44.9829	69.3359	101.257	-100.037	-80.1086	-60.0281	-40.0085	-20.0195	-30.5176	20.05	40.0391	59.9976	80.0476	100.067
141.8	-40.2832	-30.0293	-21.3623	-14.0381	-4.94385	6.28662	18.6157	29.6631	45.0439	69.2749	101.318	-100.067	-80.1086	-60.1196	-40.0391	-20.0195	30.5176	20.1111	40.0391	60.0281	80.0781	100.098
141.9	-40.3442	-30.0293	-21.3623	-14.0381	-4.94385	6.28662	18.6768	29.541	44.9829	69.2749	101.318	-100.159	-80.0781	-60.1196	-40.1001	-19.989	91.5527	20.05	39.978	60.0586	80.0781	100.098
142	-40.4053	-30.0903	-21.3013	-14.0381	-5.00488	6.22559	18.7378	29.602	44.9829	69.2139	101.379	-100.159	-80.0781	-60.0586	-40.1001	-20.05	0	19.9585	39.978	60.0586	80.0781	100.128
142.1	-40.4663	-30.0903	-21.3013	-14.0381	-5.00488	6.16455	18.7378	29.602	44.9219	69.2139	101.379	-100.159	-80.0781	-60.0891	-40.0696	-19.989	-30.5176	19.989	39.978	60.0281	80.0781	100.037
142.2	-40.5884	-30.0293	-21.1792	-14.0991	-5.06592	6.16455	18.7378	29.6631	44.8608	69.1528	101.379	-100.037	-80.0781	-60.0586	-40.0391	-19.928	0	19.989	40.0696	59.9976	80.0476	100.067
142.3	-40.7104	-30.0293	-21.1792	-14.2212	-5.12695	6.22559	18.7378	29.6631	44.8608	69.0918	101.318	-100.067	-80.0781	-60.0891	-40.0696	-19.989	0	20.0195	40.0696	60.0586	80.0476	100.098
142.4	-40.7715	-30.0293	-21.1182	-14.2212	-5.18799	6.22559	18.7378	29.6631	44.7998	69.0918	101.257	-100.067	-80.0171	-60.1196	-40.0696	-20.05	61.0352	19.989	40.0696	60.0281	80.0781	100.128
142.5	-40.8325	-30.0293	-21.1182	-14.2822	-5.18799	6.28662	18.7378	29.6631	44.7998	69.0308	101.257	-100.128	-80.1086	-60.0891	-40.0391	-20.0195	61.0352	20.0195	40.0391	59.9976	80.0781	100.037
142.6	-40.8325	-30.0293	-21.1182	-14.2822	-5.18799	6.34766	18.6768	29.6631	44.7998	69.0308	101.318	-100.189	-80.0781	-60.1196	-40.0085	-20.0195	-30.5176	20.0195	39.978	59.9976	80.0781	100.067
142.7	-40.9546	-30.0293	-21.1182	-14.2822	-5.18799	6.34766	18.5547	29.7241	44.8608	68.9697	101.44	-100.098	-80.1086	-60.1196	-40.0391	-19.9585	-30.5176	19.989	40.0696	59.9976	80.0476	100.098
142.8	-41.0767	-29.9072	-21.1182	-14.2212	-5.06592	6.34766	18.4937	29.7852	44.8608	68.9087	101.562	-100.098	-80.1086	-60.0891	-40.0391	-19.989	-30.5176	20.0195	40.0696	60.0586	80.0781	100.128
142.9	-41.1377	-29.7852	-21.1792	-14.1602	-5.00488	6.28662	18.4937	29.7852	44.7998	68.9087	101.624	-100.128	-80.0476	-60.0586	-40.1001	-19.9585	0	20.0195	40.1306	60.0586	80.1086	100.128
143	-41.1987	-29.6631	-21.2402	-14.1602	-4.94385	6.22559	18.5547	29.8462	44.7998	68.9697	101.624	-100.159	-80.0476	-60.0891	-40.1001	-20.0195	61.0352	20.0195	40.0696	60.0891	80.0781	100.098
143.1	-41.1987	-29.6631	-21.3013	-14.1602	-4.88281	6.22559	18.6768	29.8462	44.7998	69.0918	101.562	-100.159	-80.0781	-60.1501	-40.0696	-20.0195	30.5176	19.989	40.1001	59.9976	80.1086	100.037
143.2	-41.3208	-29.6631	-21.3623	-14.1602	-4.88281	6.16455	18.7378	29.7852	44.7998	69.0918	101.44	-100.128	-80.0781	-60.1196	-40.0085	-20.05	-30.5176	19.9585	40.0085	59.9976	80.0171	99.9756
143.3	-41.3818	-29.6631	-21.4233	-14.0991	-4.94385	6.16455	18.8599	29.7241	44.8608	69.0918	101.318	-100.098	-80.0781	-60.0586	-40.0085	-20.0195	-30.5176	20.0195	40.0085	59.9976	80.0171	100.006
143.4	-41.5039	-29.7852	-21.4233	-14.0991	-5.06592	6.22559	18.8599	29.6631	44.9219	69.0918	101.257	-100.098	-80.1392	-60.0891	-40.0391	-19.9585	-30.5176	20.0806	40.1001	60.0281	80.0171	100.098
143.5	-41.626	-29.9072	-21.4233	-14.0381	-5.12695	6.28662	18.7988	29.6631	44.9829	69.0918	101.135	-100.128	-80.0781	-60.0891	-40.1001	-19.989	30.5176	20.0806	40.1001	60.0586	80.0781	100.128
143.6	-41.626	-29.9072	-21.3623	-14.0381	-5.12695	6.34766	18.8599	29.602	44.9829	69.0308	101.135	-100.128	-80.0476	-60.0586	-40.0696	-19.989	0	19.989	40.0391	60.0891	80.0781	100.098
143.7	-41.626	-29.8462	-21.4233	-14.0381	-5.06592	6.46973	18.8599	29.602	44.9829	68.9087	101.074	-100.159	-80.0781	-60.1196	-40.0696	-19.989	0	19.989	39.978	60.0281	80.0781	100.128
143.8	-41.626	-29.7241	-21.4233	-14.0381	-5.06592	6.53076	18.9819	29.602	44.9219	68.9087	101.013	-100.128	-80.0781	-60.1501	-40.0391	-19.989	-61.0352	19.9585	40.0391	59.9976	80.0476	100.006
143.9	-41.687	-29.6631	-21.4233	-14.0381	-5.00488	6.5918	19.043	29.541	44.9219	68.8477	101.013	-100.128	-80.0171	-60.0891	-40.0696	-19.9585	0	19.989	40.0696	60.0281	79.9866	100.006
144	-41.687	-29.541	-21.4233	-14.0381	-4.88281	6.5918	18.9819	29.541	44.7998	68.8477	101.074	-100.159	-80.1086	-60.0281	-40.0696	-20.0195	30.5176	20.0195	40.1001	60.0586	80.0171	100.098
144.1	-41.687	-29.541	-21.3623	-14.0381	-4.82178	6.5918	18.9819	29.602	44.7388	68.7866	101.135	-100.128	-80.1086	-60.0891	-40.0391	-20.05	-61.0352	20.0195	40.0085	60.0281	80.0781	100.159
144.2	-41.687	-29.541	-21.3623	-14.0381	-4.82178	6.53076	18.8599	29.6631	44.6167	68.7866	101.196	-100.098	-80.0781	-60.0891	-40.0391	-19.989	0	20.05	40.0085	60.0281	80.0781	100.067
144.3	-41.626	-29.541	-21.3623	-14.0991	-4.88281	6.46973	18.7988	29.7241	44.5557	68.7866	101.318	-100.159	-80.1086	-60.0586	-40.0696	-20.05	30.5176	20.0195	40.0391	60.0281	80.0781	100.037
144.4	-41.5039	-29.602	-21.3623	-14.0991	-4.94385	6.40869	18.7378	29.7241	44.5557	68.7866	101.318	-100.189	-80.0476	-60.0891	-40.0696	-20.0195	-30.5176	19.9585	40.0696	60.0586	80.0781	100.098
144.5	-41.5649	-29.6631	-21.3623	-14.0991	-5.00488	6.46973	18.7378	29.7241	44.5557	68.8477	101.318	-100.159	-80.0476	-60.0891	-40.0391	-19.9585	0	19.989	40.0391	60.0281	80.0476	100.006
144.6	-41.5649	-29.8462	-21.3623	-14.0991	-5.06592	6.46973	18.7378	29.7241	44.5557	68.9087	101.379	-100.067	-80.0781	-60.0586	-40.0391	-19.989	30.5176	19.989	40.0391	60.0586	80.0476	100.037
144.7	-41.5039	-29.9683	-21.4233	-14.1602	-5.00488	6.46973	18.7378	29.7241	44.5557	68.9697	101.501	-100.159	-80.1392	-60.0891	-40.0696	-20.0195	0	19.928	40.0391	60.0586	80.0476	100.098
144.8	-41.3208	-29.9683	-21.4233	-14.2212	-5.00488	6.53076	18.7988	29.6631	44.5557	69.0308	101.624	-100.067	-80.1086	-60.0586	-40.0696	-20.0195	-30.5176	19.989	39.978	60.0891	80.1392	100.067
144.9	-41.2598	-29.8462	-21.3623	-14.3433	-5.00488	6.53076	18.8599	29.7241	44.4946	68.9697	101.746	-100.128	-80.1392	-60.0281	-40.0696	-19.989	61.0352	20.0195	39.978	60.0586	80.0781	100.037
145	-41.1987	-29.7852	-21.3013	-14.3433	-5.06592	6.46973	18.9209	29.7241	44.4946	68.9087	101.807	-100.159	-80.0476	-60.0586	-40.0391	-20.0806	0	19.9585	39.978	59.9976	80.0171	100.067
145.1	-41.1377	-29.7852	-21.2402	-14.2822	-5.06592	6.40869	18.9209	29.7852	44.4336	68.8477	101.868	-100.159	-80.0171	-60.0586	-40.0085	-20.0195	0	19.989	39.978	60.0281	80.0476	100.098
145.2	-41.1377	-29.7852	-21.3013	-14.1602	-5.00488	6.28662	18.9209	29.8462	44.3726	68.8477	101.807	-100.128	-80.1392	-60.0586	-40.0696	-20.0195	61.0352	19.989	40.0696	60.0586	80.0781	100.067
145.3	-41.1987	-29.8462	-21.3013	-14.0381	-4.94385	6.34766	18.7378	29.9072	44.3726	68.8477	101.685	-100.189	-80.0781	-60.0891	-40.1001	-19.989	-30.5176	19.989	40.0391	60.0891	80.1086	100.098
145.4	-41.2598	-29.9683	-21.3623	-13.977	-4.88281	6.40869	18.7378	29.8462	44.3726	68.8477	101.562	-100.159	-80.0781	-60.1196	-40.0696	-20.0195	0	19.9585	40.0391	60.0586	80.1086	100.098
145.5	-41.3208	-29.9683	-21.3623	-14.0381	-4.82178	6.40869	18.7378	29.8462	44.3115	68.8477	101.501	-100.128	-80.0781	-60.0586	-40.0696	-20.0195	-30.5176	19.9585	40.0391	59.9976	80.1086	100.006
145.6	-41.2598	-30.0293	-21.3013	-14.0991	-4.88281	6.40869	18.7378	29.8462	44.2505	68.7866	101.501	-100.098	-80.0781	-60.0586	-40.0085	-19.9585	0	19.9585	39.978	60.0281	80.0171	100.098
145.7	-41.1987	-29.9683	-21.2402	-14.1602	-4.88281	6.40869	18.6768	29.9072	44.3115	68.7866	101.501	-100.159	-80.1086	-60.0586	-40.0391	-20.05	-30.5176	20.0195	40.0085	60.0281	80.0171	100.098
145.8	-41.1987	-29.9072	-21.1792	-14.2212	-4.94385	6.46973	18.6768	29.9072	44.3726	68.8477	101.44	-100.128	-80.1086	-60.0891	-40.0391	-20.0806	-30.5176	19.989	40.0391	60.0891	80.0171	100.098
145.9	-41.1987	-29.7852	-21.1182	-14.1602	-5.00488	6.46973	18.6768	29.9072	44.4946	69.0308	101.501	-100.128	-80.1392	-60.0586	-40.0391	-19.989	30.5176	20.0195	40.0085	60.0891	80.0171	100.098
146	-41.2598	-29.7241	-21.1792	-14.0991	-5.06592	6.46973	18.6768	29.9072	44.4946	69.2139	101.562	-100.098	-80.0781	-60.0891	-40.0696	-20.0195	61.0352	19.989	40.0391	60.0586	80.0781	100.128
146.1	-41.3208	-29.7241	-21.1792	-14.0381	-5.18799	6.46973	18.6768	29.9072	44.4336	69.2749	101.624	-100.098	-80.0781	-60.0891	-40.0696	-19.989	0	19.9585	40.0085	60.0891	80.0781	100.128
146.2	-41.3208	-29.7241	-21.3013	-13.977	-5.24902	6.46973	18.7378	29.9072	44.2505	69.3359	101.624	-100.159	-80.1086	-60.1196	-40.0696	-20.0195	0	19.9585	40.0391	60.0281	80.0781	100.159
146.3	-41.1987	-29.8462	-21.3013	-13.916	-5.31006	6.46973	18.7378	29.9683	44.1284	69.2749	101.562	-100.159	-80.1392	-60.1196	-40.0696	-20.05	0	19.9585	40.0696	60.0281	80.0781	100.128
146.4	-41.1377	-29.9072	-21.3623	-13.916	-5.31006	6.46973	18.7378	29.9683	44.1284	69.2749	101.501	-100.128	-80.1392	-60.0586	-40.0696	-20.05	0	19.989	40.0391	60.0281	80.0781	100.128
146.5	-41.1377	-29.9683	-21.3013	-13.916	-5.24902	6.46973	18.7378	29.9683	44.0674	69.2139	101.501	-100.098	-80.1086	-60.0281	-40.0391	-19.989	30.5176	19.989	40.0391	60.0586	80.0476	100.098
146.6	-41.1377	-30.0293	-21.2402	-13.916	-5.24902	6.53076	18.6768	30.0293	44.0674	69.1528	101.562	-100.098	-80.1086	-60.0586	-40.0696	-20.0195	0	19.989	40.0085	60.0891	80.0476	100.098
146.7	-41.1987	-30.0293	-21.2402	-13.916	-5.24902	6.53076	18.6157	30.0903	44.0063	69.0918	101.624	-100.159	-80.1086	-60.0586	-40.0696	-20.05	30.5176	19.989	40.0391	60.0281	80.0781	100.159
146.8	-41.1987	-30.0903	-21.1792	-13.916	-5.31006	6.53076	18.6157	30.1514	44.0063	69.0918	101.685	-100.159	-80.1086	-60.0891	-40.0696	-20.0195	-30.5176	20.0195	40.0391	60.0891	80.0476	100.098
146.9	-41.1987	-30.0903	-21.1792	-13.916	-5.24902	6.53076	18.6768	30.1514	43.9453	69.1528	101.685	-100.159	-80.1697	-60.1196	-40.1001	-20.0806	0	19.989	40.0696	60.0586	80.0476	100.128
147	-41.1377	-30.1514	-21.1792	-13.916	-5.24902	6.53076	18.7378	30.1514	44.0063	69.1528	101.685	-100.128	-80.1086	-60.0891	-40.0696	-20.0195	0	19.9585	40.0391	60.0586	80.0781	100.128
147.1	-41.1377	-30.1514	-21.1792	-13.977	-5.18799	6.46973	18.7988	30.2124	44.0063	69.1528	101.624	-100.159	-80.0781	-60.0891	-40.1001	-20.0195	0	19.989	40.1001	60.0281	80.0781	100.067
147.2	-41.1377	-30.0903	-21.2402	-14.0381	-5.18799	6.40869	18.8599	30.2734	44.0674	69.0918	101.624	-100.098	-80.1392	-60.0586	-40.1001	-20.0195	-30.5176	19.9585	40.0391	60.0281	80.0476	100.067
147.3	-41.0767	-30.0293	-21.2402	-14.0381	-5.31006	6.34766	18.8599	30.3345	44.0674	69.0918	101.624	-100.128	-80.1392	-60.0586	-40.1001	-20.05	-30.5176	20.0195	40.0391	59.9976	80.0171	100.098
147.4	-41.0156	-29.9072	-21.2402	-14.0381	-5.31006	6.28662	18.7988	30.3955	44.1284	69.0918	101.624	-100.128	-80.1086	-60.0891	-40.0085	-20.05	-30.5176	19.9585	40.0391	59.9976	80.0171	100.128
147.5	-40.8936	-29.9072	-21.2402	-14.0991	-5.43213	6.28662	18.6768	30.3955	44.1284	69.1528	101.746	-100.128	-80.1086	-60.0586	-40.0391	-20.05	0	20.0195	39.978	60.0891	80.0171	100.098
147.6	-40.8325	-29.9072	-21.2402	-14.0991	-5.43213	6.28662	18.5547	30.3345	44.1284	69.2139	101.929	-100.159	-80.0476	-59.9976	-40.0391	-19.989	-30.5176	19.989	39.978	60.0891	80.0781	100.098
147.7	-40.8325	-29.9072	-21.2402	-14.0381	-5.43213	6.28662	18.4326	30.3345	44.1284	69.2749	102.112	-100.189	-80.1086	-60.0586	-40.0391	-20.0195	-30.5176	20.05	40.0085	60.0891	80.0171	100.067
147.8	-40.8325	-29.9072	-21.2402	-14.0381	-5.31006	6.22559	18.3105	30.2734	44.1284	69.3359	102.234	-100.159	-80.0781	-60.0586	-40.1001	-20.05	-30.5176	19.989	40.0391	60.0586	80.0781	100.098
147.9	-40.8325	-29.8462	-21.3013	-13.977	-5.18799	6.28662	18.3105	30.2124	44.1284	69.397	102.295	-100.22	-80.1086	-60.0891	-40.0696	-20.0806	0	20.0195	39.978	60.0891	80.1392	100.159
148	-40.8325	-29.8462	-21.3013	-13.977	-5.12695	6.28662	18.3716	30.2124	44.1895	69.2749	102.234	-100.189	-80.1086	-60.0891	-40.0696	-20.0195	-91.5527	19.928	40.0391	60.0281	80.0781	100.098
148.1	-40.7104	-29.7852	-21.2402	-13.977	-5.12695	6.28662	18.4937	30.2124	44.2505	69.2139	102.173	-100.067	-80.2002	-60.0281	-40.0391	-20.0195	-30.5176	19.9585	40.0085	60.0586	80.0476	100.098
148.2	-40.5273	-29.8462	-21.2402	-13.977	-5.18799	6.28662	18.4937	30.2124	44.2505	69.1528	102.112	-100.159	-80.1086	-60.0586	-40.0696	-20.0195	-91.5527	19.989	40.0085	60.0281	79.9866	100.128
148.3	-40.3442	-29.8462	-21.2402	-13.977	-5.24902	6.22559	18.5547	30.2124	44.1895	69.2139	102.112	-100.128	-80.0781	-60.0281	-40.0696	-20.05	-30.5176	19.989	39.978	60.0586	79.9866	100.159
148.4	-40.2222	-29.9072	-21.1792	-13.977	-5.24902	6.28662	18.5547	30.2124	44.0674	69.2749	102.173	-100.159	-80.0476	-60.0586	-40.0696	-20.1111	30.5176	20.0195	39.978	60.1196	80.0781	100.098
148.5	-40.2222	-29.9072	-21.1182	-14.0381	-5.24902	6.34766	18.5547	30.1514	44.0063	69.3359	102.295	-100.159	-80.0781	-60.0586	-40.0696	-20.0806	0	19.9585	40.0085	60.0586	80.0171	100.159
148.6	-40.2222	-29.8462	-21.0571	-14.0991	-5.24902	6.40869	18.5547	30.0903	44.0063	69.397	102.417	-100.159	-80.1392	-60.0586	-40.0085	-20.0195	-30.5176	19.9585	39.978	60.0891	80.0781	100.067
148.7	-40.2832	-29.8462	-21.0571	-14.0991	-5.31006	6.53076	18.4937	30.0903	44.0674	69.458	102.6	-100.128	-80.1392	-60.0891	-40.1001	-20.05	-30.5176	19.8975	40.0391	60.0586	80.0171	100.098
148.8	-40.3442	-29.8462	-20.9961	-14.0381	-5.31006	6.53076	18.4937	30.0903	44.1895	69.458	102.661	-100.189	-80.1392	-60.0586	-40.0696	-20.0195	-30.5176	19.9585	40.0391	60.0891	80.0476	100.098
148.9	-40.4053	-29.8462	-21.0571	-13.977	-5.43213	6.53076	18.5547	30.0903	44.1895	69.458	102.661	-100.128	-80.1392	-60.0586	-40.1001	-20.05	-30.5176	19.989	40.0085	60.0586	80.0781	100.128
149	-40.4663	-29.8462	-21.1792	-13.977	-5.49316	6.46973	18.5547	30.0293	44.2505	69.458	102.6	-100.128	-80.0781	-60.0891	-40.0391	-20.0806	-30.5176	19.9585	39.978	60.0891	80.0781	100.159
149.1	-40.5273	-29.8462	-21.1792	-13.977	-5.49316	6.53076	18.5547	30.0293	44.2505	69.519	102.478	-100.128	-80.1392	-60.0891	-40.0085	-20.0806	0	19.989	39.9475	60.0586	80.0171	100.098
149.2	-40.5273	-29.9072	-21.1182	-14.0381	-5.49316	6.5918	18.5547	29.9683	44.2505	69.519	102.356	-100.128	-80.1086	-60.0891	-40.0391	-20.05	-30.5176	19.928	40.0391	60.0281	80.0171	100.128
149.3	-40.4663	-29.9072	-21.0571	-14.0991	-5.49316	6.5918	18.5547	30.0293	44.2505	69.6411	102.356	-100.128	-80.1697	-60.0586	-40.0696	-20.0195	-30.5176	19.989	39.978	60.1196	79.9866	100.128
149.4	-40.4663	-29.9072	-21.0571	-14.1602	-5.43213	6.65283	18.4937	30.0903	44.2505	69.7021	102.356	-100.159	-80.1086	-60.0586	-40.0085	-20.0806	30.5176	19.989	40.0391	60.0891	80.0781	100.159
149.5	-40.4663	-29.9072	-20.9961	-14.2212	-5.37109	6.65283	18.5547	30.1514	44.3726	69.7021	102.356	-100.189	-80.0781	-60.0586	-40.1001	-20.0195	30.5176	19.9585	39.978	60.1501	80.1392	100.128
149.6	-40.4663	-29.9072	-20.9961	-14.2212	-5.31006	6.65283	18.5547	30.2124	44.4336	69.7021	102.478	-100.189	-80.1086	-60.0891	-40.1306	-20.0806	-61.0352	19.928	40.0696	60.0891	80.0781	100.098
149.7	-40.4663	-30.0293	-20.9961	-14.2822	-5.31006	6.5918	18.6157	30.2124	44.4946	69.6411	102.6	-100.159	-80.1392	-60.0586	-40.0696	-20.0806	-61.0352	19.8975	40.0391	60.0586	80.0476	100.128
149.8	-40.4663	-30.0293	-20.9961	-14.4043	-5.31006	6.46973	18.6157	30.3345	44.5557	69.6411	102.661	-100.098	-80.1697	-60.0586	-40.0696	-20.0195	-91.5527	19.9585	40.0391	60.0891	80.0171	100.128
149.9	-40.4663	-30.0903	-21.0571	-14.4653	-5.24902	6.40869	18.6157	30.4565	44.5557	69.519	102.722	-100.098	-80.1697	-59.9976	-40.0391	-20.05	-61.0352	19.989	40.0391	60.0586	79.9866	100.128
150	-40.4053	-30.0903	-21.1182	-14.4653	-5.24902	6.40869	18.6157	30.4565	44.5557	69.458	102.722	-100.159	-80.0781	-60.0891	-40.1001	-20.0195	30.5176	19.989	40.0085	60.1196	80.0781	100.159
150.1	-40.4053	-30.0903	-21.1792	-14.4043	-5.24902	6.40869	18.5547	30.4565	44.4946	69.458	102.783	-100.159	-80.0781	-60.1196	-40.1001	-20.0806	61.0352	19.9585	40.0085	60.1196	80.0781	100.098
150.2	-40.3442	-30.0903	-21.1182	-14.3433	-5.31006	6.40869	18.4937	30.3955	44.4946	69.458	102.844	-100.159	-80.0781	-60.0891	-40.1306	-20.0195	-30.5176	19.8975	39.917	60.0891	80.0476	100.128
150.3	-40.3442	-30.0903	-21.0571	-14.2822	-5.37109	6.46973	18.3716	30.3955	44.4336	69.458	102.905	-100.128	-80.1392	-60.0586	-40.0696	-20.0195	-91.5527	19.928	40.0085	60.0586	80.0171	100.006
150.4	-40.3442	-30.0293	-21.0571	-14.2822	-5.37109	6.46973	18.3716	30.3955	44.3726	69.397	102.905	-100.128	-80.1697	-60.0891	-40.0696	-20.0195	-91.5527	19.928	39.978	60.1196	80.0476	100.128
150.5	-40.3442	-30.0293	-20.9961	-14.3433	-5.37109	6.46973	18.3716	30.3345	44.4336	69.3359	102.844	-100.159	-80.1392	-60.0891	-40.0696	-19.989	-30.5176	19.989	40.0696	60.1196	80.0781	100.159
150.6	-40.2832	-29.9683	-20.9351	-14.3433	-5.31006	6.46973	18.3716	30.2734	44.4946	69.2749	102.783	-100.159	-80.0476	-60.0586	-40.1001	-20.0806	30.5176	19.989	40.0391	60.1196	80.0781	100.159
150.7	-40.2832	-30.0293	-20.9351	-14.4043	-5.37109	6.53076	18.4326	30.1514	44.5557	69.2139	102.661	-100.159	-80.1086	-60.0891	-40.0391	-20.1111	30.5176	19.928	39.978	60.0586	80.0171	100.189
150.8	-40.2832	-30.0903	-20.9961	-14.4043	-5.37109	6.46973	18.4326	30.0293	44.6167	69.2139	102.661	-100.067	-80.1086	-60.0586	-40.0391	-20.0806	-61.0352	19.9585	39.9475	60.0586	80.0781	100.098
150.9	-40.2832	-30.0903	-20.9961	-14.3433	-5.37109	6.53076	18.4326	29.9683	44.6777	69.2749	102.661	-100.159	-80.1392	-60.0891	-39.978	-20.0195	-61.0352	19.9585	39.978	59.9976	80.0171	100.128
151	-40.3442	-30.0903	-20.9961	-14.3433	-5.37109	6.53076	18.5547	29.9683	44.7998	69.2749	102.783	-100.128	-80.1392	-60.0586	-40.0696	-20.0195	0	19.9585	40.0391	60.0586	80.0476	100.128
151.1	-40.2832	-30.1514	-21.0571	-14.2822	-5.37109	6.5918	18.6157	30.0293	44.8608	69.2749	102.905	-100.159	-80.1086	-60.0891	-40.0696	-20.05	30.5176	20.0195	40.0696	60.1196	80.0781	100.098
151.2	-40.2832	-30.1514	-21.1182	-14.2822	-5.43213	6.5918	18.6768	30.0293	44.9219	69.2139	102.966	-100.159	-80.1086	-60.0586	-40.1001	-20.05	-30.5176	19.9585	40.0391	60.1196	80.0781	100.128
151.3	-40.2222	-30.1514	-21.1792	-14.2212	-5.43213	6.5918	18.6768	30.1514	44.9219	69.2139	103.027	-100.128	-80.1392	-60.0891	-40.1001	-20.0806	-61.0352	19.928	39.9475	60.0586	80.0476	100.067
151.4	-40.2832	-30.1514	-21.1792	-14.1602	-5.49316	6.65283	18.6157	30.1514	44.9219	69.0918	103.088	-100.128	-80.1697	-60.0281	-40.0391	-20.05	-61.0352	19.928	39.978	60.0586	79.9866	100.128
151.5	-40.3442	-30.0903	-21.2402	-14.0991	-5.43213	6.65283	18.5547	30.1514	44.9219	69.0918	103.027	-100.098	-80.1697	-60.0281	-40.0391	-20.0195	-61.0352	19.9585	39.978	60.0586	79.9866	100.128
151.6	-40.4053	-30.0293	-21.2402	-14.0991	-5.43213	6.71387	18.5547	30.1514	44.9219	69.0918	102.966	-100.128	-80.1392	-60.0586	-40.0391	-19.989	0	20.0195	40.0696	60.0891	80.0171	100.189
151.7	-40.5273	-30.0293	-21.1792	-14.0991	-5.37109	6.71387	18.4937	30.0903	44.9219	69.1528	102.966	-100.128	-80.1086	-60.0586	-40.0391	-20.0195	0	20.0195	40.0391	60.1196	80.1086	100.159
151.8	-40.5273	-30.0293	-21.1182	-14.0381	-5.31006	6.71387	18.4937	30.1514	44.9219	69.2749	102.966	-100.159	-80.0781	-60.1196	-40.0391	-20.0806	30.5176	19.9585	40.0085	60.0891	80.0171	100.128
151.9	-40.4053	-29.9683	-21.0571	-13.977	-5.24902	6.71387	18.4937	30.1514	44.8608	69.3359	103.027	-100.128	-80.0476	-60.0891	-40.0085	-20.0806	-61.0352	19.8975	39.978	60.0586	80.0476	100.067
152	-40.3442	-29.9072	-21.0571	-13.977	-5.24902	6.71387	18.4937	30.1514	44.8608	69.397	103.027	-100.128	-80.1392	-60.0586	-40.0696	-19.989	-61.0352	19.989	40.0085	60.0281	80.0476	100.098
152.1	-40.3442	-29.8462	-21.0571	-13.916	-5.24902	6.71387	18.4937	30.1514	44.7998	69.458	103.027	-100.159	-80.1392	-60.0586	-40.0696	-19.989	-30.5176	19.989	40.0085	60.0586	80.0476	100.098
152.2	-40.3442	-29.7852	-21.0571	-13.977	-5.24902	6.7749	18.5547	30.0903	44.7998	69.458	102.966	-100.159	-80.1086	-60.0586	-40.1001	-20.05	-30.5176	19.989	40.0391	60.1196	80.0476	100.128
152.3	-40.4053	-29.7852	-21.1182	-14.0381	-5.24902	6.7749	18.5547	30.0903	44.8608	69.458	102.966	-100.128	-80.1086	-59.9976	-40.0696	-20.05	30.5176	20.0195	40.0085	60.0891	80.0476	100.189
152.4	-40.4053	-29.8462	-21.1182	-14.0991	-5.24902	6.7749	18.5547	30.0293	44.9219	69.397	102.905	-100.098	-80.0476	-60.0586	-40.0696	-20.0806	0	19.989	39.978	60.0891	80.0171	100.189
152.5	-40.4663	-29.8462	-21.1792	-14.1602	-5.31006	6.7749	18.4937	29.9683	44.9219	69.3359	102.844	-100.098	-80.0781	-60.0586	-40.0085	-20.05	0	19.989	39.978	60.0891	80.0171	100.098
152.6	-40.4663	-29.8462	-21.2402	-14.2212	-5.37109	6.71387	18.4937	29.9683	44.9219	69.3359	102.844	-100.159	-80.1697	-60.0586	-40.1001	-20.05	0	19.9585	40.0085	60.0891	80.0781	100.128
152.7	-40.4053	-29.9072	-21.1182	-14.2822	-5.37109	6.5918	18.5547	29.9072	44.7998	69.3359	102.905	-100.159	-80.0781	-60.1196	-40.0696	-19.989	-30.5176	19.9585	40.0391	60.0281	80.0171	100.098
152.8	-40.4663	-29.8462	-21.0571	-14.3433	-5.37109	6.53076	18.5547	29.9683	44.7388	69.3359	103.027	-100.159	-80.0171	-60.1196	-40.1001	-19.9585	-61.0352	19.9585	40.0391	60.0586	80.0781	100.067
152.9	-40.5884	-29.9072	-20.874	-14.3433	-5.43213	6.53076	18.5547	30.0293	44.7388	69.2749	103.149	-100.098	-80.1697	-60.0586	-40.1306	-20.1111	-30.5176	19.9585	40.0391	60.1196	80.1086	100.128
153	-40.7104	-30.0293	-20.874	-14.2822	-5.5542	6.53076	18.4937	30.0903	44.6777	69.2749	103.333	-100.128	-80.1086	-60.0891	-40.1306	-20.0806	-61.0352	19.9585	39.978	60.0586	80.0781	100.098
153.1	-40.7715	-30.1514	-20.9961	-14.1602	-5.49316	6.5918	18.4326	30.0903	44.6167	69.2749	103.455	-100.159	-80.0476	-60.0891	-40.0696	-20.0806	0	19.989	39.978	60.0586	80.0781	100.067
153.2	-40.7715	-30.2734	-21.0571	-14.2212	-5.43213	6.5918	18.4937	30.0903	44.6167	69.2749	103.577	-100.159	-80.0781	-60.0586	-40.0696	-20.0806	30.5176	19.9585	39.978	60.0586	80.0476	100.128
153.3	-40.6494	-30.2734	-21.0571	-14.3433	-5.43213	6.71387	18.4937	30.0903	44.5557	69.2139	103.638	-100.128	-80.0781	-60.0281	-40.0696	-19.989	-30.5176	19.989	40.0085	60.0586	80.0171	100.159
153.4	-40.5273	-30.3955	-21.0571	-14.4043	-5.49316	6.7749	18.6157	30.0293	44.6167	69.2139	103.638	-100.098	-80.0476	-60.0891	-40.0391	-20.0195	-30.5176	19.989	40.0085	60.1196	80.0781	100.098
153.5	-40.4663	-30.3955	-21.0571	-14.4043	-5.49316	6.71387	18.6157	30.0903	44.6777	69.2139	103.638	-100.128	-80.1392	-60.0586	-40.0391	-20.05	-61.0352	19.928	40.0085	60.0586	80.1086	100.128
153.6	-40.4053	-30.4565	-21.0571	-14.4043	-5.49316	6.65283	18.5547	30.1514	44.7388	69.2749	103.699	-100.159	-80.0781	-60.1196	-40.0696	-19.989	0	19.9585	40.0085	60.0281	80.1086	100.098
153.7	-40.3442	-30.3955	-21.1182	-14.3433	-5.49316	6.5918	18.4937	30.1514	44.9219	69.3359	103.699	-100.189	-80.0476	-60.0586	-40.0696	-20.0806	30.5176	19.9585	40.0085	60.0281	80.0781	100.067
153.8	-40.3442	-30.3955	-21.1182	-14.3433	-5.49316	6.5918	18.4937	30.1514	44.9829	69.458	103.76	-100.128	-80.1392	-60.0586	-40.0696	-20.0806	-30.5176	19.9585	40.0696	60.0586	80.0476	100.098
153.9	-40.3442	-30.3345	-21.1182	-14.3433	-5.5542	6.5918	18.4937	30.1514	45.0439	69.519	103.821	-100.128	-80.0781	-60.0891	-40.0085	-20.0195	0	20.0195	39.978	59.9976	80.0476	100.098
154	-40.3442	-30.3345	-21.1182	-14.2822	-5.61523	6.5918	18.5547	30.1514	45.0439	69.458	103.882	-100.128	-80.1086	-60.0586	-40.0696	-20.05	0	19.9585	40.0085	60.0891	80.0476	100.128
154.1	-40.4053	-30.3345	-21.1182	-14.2822	-5.67627	6.65283	18.6768	30.1514	45.0439	69.3359	103.821	-100.128	-80.0476	-60.0891	-40.0696	-19.989	30.5176	19.989	40.0085	60.0891	80.0781	100.128
154.2	-40.4663	-30.3955	-21.0571	-14.2822	-5.61523	6.65283	18.6768	30.1514	45.0439	69.2749	103.76	-100.159	-80.1086	-60.0891	-40.0696	-20.0195	30.5176	19.9585	39.978	60.0891	80.0171	100.159
154.3	-40.4663	-30.4565	-21.0571	-14.2822	-5.49316	6.65283	18.6768	30.1514	44.9829	69.3359	103.638	-100.159	-80.0781	-60.0586	-39.978	-20.0195	-30.5176	19.989	40.0391	60.0586	80.0476	100.098
154.4	-40.4053	-30.5176	-21.1182	-14.2822	-5.43213	6.5918	18.6157	30.0903	44.9829	69.2749	103.577	-100.159	-80.1086	-60.1196	-40.0391	-19.989	0	19.989	40.0391	60.0891	80.1392	100.098
154.5	-40.2832	-30.5176	-21.1792	-14.2822	-5.43213	6.5918	18.5547	30.0293	44.9219	69.2139	103.516	-100.098	-80.1392	-60.0586	-40.1001	-20.0195	0	19.989	40.0085	60.1501	80.0476	100.037
154.6	-40.2222	-30.4565	-21.2402	-14.3433	-5.43213	6.5918	18.5547	30.0293	44.9219	69.1528	103.455	-100.128	-80.1086	-60.0891	-40.0696	-19.989	-30.5176	19.989	40.0085	60.0586	80.0476	100.128
154.7	-40.1611	-30.3955	-21.2402	-14.4043	-5.5542	6.53076	18.4937	30.0293	44.9219	69.0918	103.333	-100.159	-80.0781	-60.0586	-40.0391	-20.0806	-30.5176	20.0806	39.978	60.0281	79.9866	100.128
154.8	-40.1611	-30.3345	-21.2402	-14.3433	-5.61523	6.53076	18.4937	30.0903	44.9219	69.0308	103.21	-100.128	-80.0476	-60.1196	-40.0391	-20.05	-30.5176	19.989	40.0391	59.967	80.0781	100.128
154.9	-40.1611	-30.3955	-21.1792	-14.3433	-5.67627	6.53076	18.4326	30.0903	44.9829	69.0308	103.088	-100.067	-80.0476	-60.0891	-40.0696	-20.05	30.5176	20.0195	39.978	60.0586	80.0476	100.128
155	-40.2222	-30.3955	-21.1182	-14.3433	-5.67627	6.53076	18.3716	30.0293	44.9219	68.9697	102.966	-100.159	-80.0781	-60.1196	-40.0696	-19.989	30.5176	19.989	40.0391	60.0281	80.0171	100.098
155.1	-40.2832	-30.3955	-21.0571	-14.3433	-5.61523	6.5918	18.3105	29.9683	44.8608	68.9087	102.905	-100.128	-80.0781	-60.0891	-40.0696	-19.989	-30.5176	20.0195	40.0391	60.0891	80.0171	100.098
155.2	-40.2832	-30.3345	-20.9961	-14.2822	-5.67627	6.53076	18.2495	29.9072	44.6777	68.8477	102.844	-100.159	-80.0476	-60.1196	-40.0391	-19.9585	0	19.989	39.978	60.0586	80.0476	100.067
155.3	-40.2832	-30.2734	-21.0571	-14.2822	-5.67627	6.53076	18.2495	29.9683	44.5557	68.7866	102.844	-100.159	-80.0476	-60.1196	-40.0391	-20.0195	0	19.9585	40.0085	60.0281	80.1086	100.128
155.4	-40.2832	-30.2734	-21.1182	-14.2212	-5.67627	6.46973	18.1885	29.9683	44.4946	68.7866	102.844	-100.128	-80.0781	-60.0891	-40.0391	-20.0195	0	19.989	40.0696	60.0281	80.0781	100.098
155.5	-40.2832	-30.3345	-21.1792	-14.2212	-5.67627	6.40869	18.1274	30.0293	44.4946	68.7866	102.783	-100.128	-80.1086	-60.0586	-40.0391	-20.0195	30.5176	20.0195	40.0391	60.0281	80.0476	100.128
155.6	-40.2832	-30.3955	-21.2402	-14.2212	-5.7373	6.40869	18.1274	30.0293	44.5557	68.7866	102.783	-100.098	-80.0781	-60.1196	-40.0391	-20.0195	61.0352	20.05	39.978	59.9976	80.0171	100.128
155.7	-40.2222	-30.4565	-21.2402	-14.2822	-5.7373	6.34766	18.1274	29.9683	44.5557	68.7866	102.844	-100.159	-80.0476	-60.0891	-40.0085	-19.989	0	20.0195	40.0085	60.0281	80.0171	100.098
155.8	-40.1001	-30.5176	-21.3013	-14.3433	-5.7373	6.40869	18.0664	29.9072	44.5557	68.7866	102.905	-100.128	-80.0476	-60.1196	-40.0391	-19.9585	30.5176	19.9585	39.978	60.0891	80.0476	100.067
155.9	-40.0391	-30.5786	-21.3623	-14.4043	-5.79834	6.46973	18.1274	29.9072	44.5557	68.7866	103.027	-100.159	-80.0476	-60.1196	-40.0391	-20.0195	0	19.989	40.0391	60.0586	80.0171	100.098
156	-39.978	-30.6396	-21.4233	-14.3433	-5.79834	6.53076	18.1274	29.9683	44.5557	68.7866	103.088	-100.128	-80.0781	-60.1501	-40.0085	-20.05	30.5176	19.989	40.0696	60.0586	80.0781	100.098
156.1	-40.0391	-30.6396	-21.4844	-14.3433	-5.7373	6.5918	18.1274	29.9683	44.6167	68.7866	103.149	-100.067	-80.1086	-60.0586	-40.0391	-20.0195	30.5176	19.989	40.0391	60.0586	80.0476	100.037
156.2	-40.0391	-30.5786	-21.4233	-14.2822	-5.67627	6.53076	18.1274	29.9683	44.6777	68.8477	103.149	-100.128	-80.1086	-60.0891	-40.0391	-19.989	0	19.989	39.978	60.0281	80.0476	100.098
156.3	-40.0391	-30.5786	-21.3623	-14.2822	-5.67627	6.53076	18.1274	29.9072	44.6777	68.9087	103.027	-100.098	-80.0781	-60.0586	-40.0391	-20.0195	30.5176	19.989	40.0696	60.0281	80.0171	100.037
156.4	-40.0391	-30.6396	-21.2402	-14.2822	-5.67627	6.53076	18.1274	29.8462	44.6167	68.9087	103.027	-100.159	-80.0781	-60.0586	-40.0085	-19.989	0	20.0195	40.0085	60.0281	80.0781	100.128
156.5	-40.0391	-30.7007	-21.1792	-14.2212	-5.7373	6.53076	18.0664	29.8462	44.5557	68.9087	103.088	-100.159	-80.0476	-60.1196	-40.0391	-20.0195	61.0352	20.05	40.0391	60.0586	80.0171	100.098
156.6	-40.1001	-30.7617	-21.1792	-14.2212	-5.7373	6.53076	18.0664	29.9072	44.5557	68.8477	103.088	-100.128	-80.0476	-60.1196	-40.0085	-19.9585	30.5176	19.9585	40.0391	60.0891	80.0476	100.067
156.7	-40.1001	-30.7617	-21.1792	-14.2212	-5.7373	6.53076	18.1274	30.0293	44.5557	68.8477	102.966	-100.159	-80.1086	-60.0891	-40.0085	-19.989	30.5176	20.0195	40.0391	60.0586	80.0171	100.067
156.8	-40.1001	-30.7617	-21.3013	-14.2212	-5.79834	6.46973	18.1885	30.1514	44.6167	68.8477	102.844	-100.128	-80.0476	-60.0891	-39.978	-19.989	-30.5176	19.9585	40.0391	60.0281	80.0171	100.067
156.9	-40.1001	-30.7617	-21.3623	-14.2212	-5.79834	6.46973	18.2495	30.2124	44.6777	68.8477	102.722	-100.159	-80.0781	-60.1196	-40.0391	-19.9585	-30.5176	19.989	40.0696	60.0586	80.0476	100.037
157	-40.0391	-30.7007	-21.4844	-14.2212	-5.85937	6.46973	18.2495	30.2124	44.6167	68.8477	102.722	-100.128	-80.0476	-60.0586	-40.0696	-20.0806	0	20.0195	40.1001	60.0281	80.0476	100.067
157.1	-40.1001	-30.7007	-21.5454	-14.2212	-5.85937	6.46973	18.2495	30.2124	44.6777	68.7866	102.783	-100.128	-80.0476	-60.0891	-40.0696	-20.0806	0	20.0195	40.0391	60.0281	80.0476	100.098
157.2	-40.1001	-30.7007	-21.4844	-14.1602	-5.92041	6.46973	18.2495	30.1514	44.6777	68.7256	102.905	-100.159	-80.0781	-60.0281	-40.0391	-20.0195	0	20.0195	40.0391	60.0281	80.0781	100.037
157.3	-40.1611	-30.7007	-21.4233	-14.0991	-5.92041	6.53076	18.1885	30.0903	44.7388	68.7256	103.088	-100.128	-80.0476	-60.0891	-40.0391	-20.0195	0	19.9585	40.0391	59.967	80.0171	100.098
157.4	-40.1611	-30.7617	-21.3623	-14.0991	-5.92041	6.53076	18.1885	30.1514	44.8608	68.6645	103.21	-100.128	-80.0476	-60.0586	-40.0391	-19.9585	0	19.9585	40.0391	60.0281	80.0171	100.006
157.5	-40.1001	-30.7617	-21.3623	-14.0381	-5.92041	6.5918	18.1274	30.1514	44.9219	68.5425	103.333	-100.159	-80.0171	-60.0891	-40.1001	-19.989	0	20.0195	40.1001	60.0891	80.0476	100.006
157.6	-40.0391	-30.7617	-21.3623	-14.0381	-5.92041	6.65283	18.0664	30.0903	45.0439	68.4814	103.455	-100.159	-80.0476	-60.0891	-40.0391	-19.989	30.5176	19.989	40.0696	60.0891	80.0476	100.067
157.7	-40.0391	-30.7617	-21.3623	-13.977	-5.92041	6.65283	18.0664	30.0903	45.105	68.4204	103.516	-100.159	-80.1086	-60.1196	-40.0391	-20.05	91.5527	20.0195	40.0085	60.0586	80.1697	100.037
157.8	-39.978	-30.7617	-21.3623	-13.977	-5.85937	6.65283	18.0664	30.0293	45.105	68.4204	103.577	-100.128	-80.0781	-60.0586	-40.0391	-20.0195	0	19.928	40.0085	59.9976	80.0781	100.006
157.9	-39.978	-30.7007	-21.3013	-13.977	-5.85937	6.5918	18.0664	30.0903	45.0439	68.4814	103.577	-100.067	-80.0781	-60.0586	-40.0696	-19.989	-61.0352	19.989	40.0391	59.9976	80.0781	100.037
158	-39.917	-30.7617	-21.3013	-13.977	-5.85937	6.5918	18.0664	30.2124	44.9829	68.6035	103.577	-100.128	-80.1392	-60.0586	-40.0391	-20.0195	-61.0352	19.989	40.0391	59.967	80.0476	100.098
158.1	-39.856	-30.7617	-21.3013	-14.0381	-5.85937	6.53076	18.0664	30.2124	44.8608	68.6035	103.577	-100.159	-79.9866	-60.0891	-40.0391	-20.0195	0	20.0195	40.0391	60.0586	80.0781	100.128
158.2	-39.7949	-30.7617	-21.3013	-14.0991	-5.92041	6.46973	18.1274	30.2124	44.8608	68.6035	103.455	-100.098	-80.0476	-60.1196	-40.0391	-19.989	30.5176	20.0195	40.0391	60.1196	80.0781	100.128
158.3	-39.7339	-30.7617	-21.3623	-14.0991	-5.92041	6.40869	18.1274	30.2124	44.7998	68.4814	103.333	-100.159	-80.0476	-60.1196	-40.0696	-19.989	0	20.0195	40.0085	60.0891	80.1086	100.067
158.4	-39.7339	-30.7617	-21.3623	-14.0991	-5.92041	6.40869	18.1885	30.2124	44.7998	68.4814	103.271	-100.159	-80.0476	-60.1501	-39.978	-19.989	0	19.989	39.978	60.0281	80.0171	100.098
158.5	-39.7339	-30.7007	-21.3623	-14.0991	-5.85937	6.46973	18.1274	30.2124	44.7388	68.4204	103.21	-100.128	-80.0476	-60.1196	-40.0391	-19.989	-30.5176	19.9585	40.0391	59.9976	80.0476	100.067
158.6	-39.7339	-30.5786	-21.4233	-14.0381	-5.79834	6.53076	18.0664	30.2124	44.7388	68.4204	103.271	-100.128	-80.0781	-60.1196	-40.0696	-19.989	0	20.05	40.1001	59.967	80.0781	100.098
158.7	-39.7339	-30.5176	-21.4233	-14.0381	-5.79834	6.53076	18.0664	30.2124	44.7998	68.4814	103.333	-100.098	-80.0476	-60.0891	-40.0696	-20.05	30.5176	20.0806	40.1001	60.0281	80.1086	100.098
158.8	-39.6728	-30.4565	-21.4844	-13.977	-5.79834	6.5918	18.0054	30.2124	44.7998	68.4814	103.333	-100.128	-80.0171	-60.0891	-40.0391	-20.05	91.5527	20.1111	40.0085	60.0281	80.1392	100.159
158.9	-39.6728	-30.4565	-21.4844	-13.977	-5.79834	6.5918	18.0664	30.2124	44.7998	68.4814	103.333	-100.128	-80.0476	-60.0891	-40.0391	-20.05	30.5176	20.0195	40.0391	59.9976	80.0781	100.128
159	-39.6118	-30.3955	-21.6064	-13.916	-5.79834	6.53076	18.0664	30.2124	44.7998	68.5425	103.333	-100.128	-80.0781	-60.1196	-40.0085	-19.9585	-61.0352	20.0195	40.0085	59.967	80.0171	100.098
159.1	-39.5508	-30.3345	-21.6675	-13.916	-5.67627	6.46973	18.1274	30.2124	44.7388	68.5425	103.394	-100.098	-80.0476	-60.1501	-39.978	-19.989	0	20.0195	40.0391	60.0586	80.0171	100.067
159.2	-39.5508	-30.3345	-21.7285	-13.916	-5.61523	6.46973	18.1885	30.2124	44.7998	68.5425	103.271	-100.128	-80.0476	-60.1501	-40.0085	-19.9585	0	20.0806	40.0391	60.0586	80.0476	100.128
159.3	-39.5508	-30.2734	-21.8506	-13.977	-5.49316	6.46973	18.2495	30.1514	44.7998	68.5425	103.21	-100.128	-80.0781	-60.1501	-40.0085	-19.989	61.0352	20.05	40.1306	60.0586	80.1697	100.128
159.4	-39.6118	-30.2124	-21.8506	-14.0381	-5.49316	6.46973	18.2495	30.1514	44.8608	68.5425	103.088	-100.098	-80.0476	-60.0891	-40.0696	-19.989	61.0352	20.0195	40.0391	60.0281	80.1392	100.067
159.5	-39.6118	-30.2124	-21.7895	-14.0991	-5.49316	6.46973	18.2495	30.1514	44.7998	68.5425	102.905	-100.128	-80.0781	-60.0586	-40.0391	-19.9585	30.5176	19.928	40.0391	59.967	80.0781	100.037
159.6	-39.6118	-30.2124	-21.7285	-14.0991	-5.5542	6.40869	18.2495	30.0903	44.7388	68.5425	102.844	-100.098	-80.0476	-60.0891	-40.0085	-19.989	-30.5176	19.9585	40.0085	59.967	80.0171	100.037
159.7	-39.4897	-30.2124	-21.6675	-14.0991	-5.5542	6.34766	18.2495	30.0903	44.6167	68.4814	102.783	-100.098	-80.0476	-60.1196	-40.0085	-19.989	30.5176	20.1111	40.0391	59.9976	80.0476	100.037
159.8	-39.3677	-30.2734	-21.6064	-14.0381	-5.5542	6.28662	18.2495	30.0903	44.6167	68.4814	102.844	-100.159	-80.0781	-60.1501	-40.0085	-19.989	30.5176	20.05	40.0696	60.0281	80.1392	100.128
159.9	-39.3677	-30.2734	-21.5454	-14.0991	-5.5542	6.28662	18.2495	30.1514	44.5557	68.5425	102.905	-100.098	-80.0781	-60.0891	-39.978	-20.0195	61.0352	20.05	40.0391	60.0586	80.0781	100.098
160	-39.4897	-30.2734	-21.4844	-14.1602	-5.5542	6.34766	18.2495	30.1514	44.4946	68.4814	102.966	-100.098	-80.0781	-60.1196	-40.0085	-20.0195	61.0352	20.0195	40.1001	60.0586	80.0476	100.067
160.1	-39.6118	-30.2734	-21.3623	-14.2212	-5.5542	6.46973	18.2495	30.1514	44.4946	68.4814	103.027	-100.128	-80.1086	-60.1196	-40.0696	-19.989	30.5176	19.928	40.0391	59.9976	79.9866	100.037
160.2	-39.7339	-30.2734	-21.2402	-14.2212	-5.61523	6.53076	18.3105	30.1514	44.4336	68.5425	103.027	-100.189	-80.1392	-60.0586	-40.0696	-19.9585	-61.0352	19.9585	40.0696	60.0281	79.9866	100.037
160.3	-39.7339	-30.3345	-21.2402	-14.2212	-5.61523	6.5918	18.3105	30.1514	44.4336	68.5425	103.027	-100.128	-80.1086	-60.0891	-40.1001	-19.989	-61.0352	20.0195	40.1001	59.9976	80.0476	100.067
160.4	-39.7339	-30.3345	-21.3013	-14.1602	-5.61523	6.5918	18.3716	30.0903	44.3726	68.5425	103.027	-100.189	-80.0781	-60.1196	-40.0391	-19.989	0	20.0195	40.1001	60.0586	80.0476	100.098
160.5	-39.6728	-30.2734	-21.4233	-14.0991	-5.61523	6.53076	18.3716	29.9683	44.4336	68.5425	103.149	-100.159	-80.0781	-60.1501	-39.978	-20.0195	30.5176	20.0195	40.0391	60.0281	80.1086	100.037
160.6	-39.6728	-30.2734	-21.4844	-14.0381	-5.61523	6.46973	18.3716	29.9072	44.4946	68.4814	103.149	-100.067	-80.1392	-60.0891	-40.0391	-19.989	30.5176	19.989	40.0391	60.0586	80.0476	100.098
160.7	-39.5508	-30.2734	-21.5454	-14.0381	-5.61523	6.46973	18.3716	29.7852	44.6167	68.4814	103.149	-100.128	-80.1086	-60.0891	-40.0391	-20.0195	0	19.989	40.0696	60.0586	79.9866	100.037
160.8	-39.4897	-30.2124	-21.4844	-14.0381	-5.61523	6.46973	18.3716	29.7241	44.7998	68.4204	103.088	-100.159	-80.0476	-60.0891	-40.0085	-19.989	30.5176	19.9585	40.0696	60.0586	80.0171	100.067
160.9	-39.4287	-30.2124	-21.4233	-13.977	-5.61523	6.53076	18.3105	29.7241	44.9219	68.3594	102.905	-100.159	-80.0476	-60.0586	-40.0696	-19.9585	0	20.0195	40.0391	59.9976	80.1086	100.128
161	-39.4287	-30.1514	-21.4233	-13.977	-5.67627	6.65283	18.3105	29.7241	44.9829	68.2373	102.844	-100.159	-80.0781	-60.0891	-40.0696	-20.05	-61.0352	20.0195	40.0696	60.0586	80.0476	100.098
161.1	-39.4287	-30.0293	-21.4233	-13.977	-5.67627	6.71387	18.2495	29.7852	44.9829	68.2373	102.844	-100.159	-80.0476	-60.1196	-40.0391	-20.05	30.5176	19.9585	40.0391	60.0281	80.0476	100.128
161.2	-39.4287	-30.0293	-21.4233	-13.977	-5.67627	6.7749	18.2495	29.8462	44.9829	68.2373	102.844	-100.128	-80.1392	-60.0586	-40.0696	-20.0195	0	19.9585	40.0391	60.0281	80.0781	100.006
161.3	-39.3677	-30.0903	-21.4844	-13.977	-5.67627	6.7749	18.3105	29.8462	44.9219	68.2983	102.844	-100.159	-80.0476	-60.0891	-40.0696	-19.989	0	20.0195	40.0085	60.0281	80.0171	100.037
161.4	-39.2456	-30.0903	-21.6064	-13.916	-5.67627	6.71387	18.3716	29.9072	44.8608	68.3594	102.844	-100.128	-80.0781	-60.1501	-40.0696	-20.05	-30.5176	19.989	40.0391	59.9976	80.0171	100.098
161.5	-39.1235	-30.0293	-21.7285	-13.916	-5.7373	6.65283	18.4326	29.8462	44.8608	68.3594	102.905	-100.128	-80.0781	-60.0891	-40.0391	-19.989	0	20.0195	40.0696	60.0891	80.0476	100.098
161.6	-39.0625	-29.9072	-21.6675	-13.977	-5.67627	6.5918	18.4937	29.7852	44.8608	68.4204	102.905	-100.159	-80.0476	-60.1196	-40.1001	-19.989	30.5176	20.0195	40.0391	60.0586	80.0781	100.067
161.7	-39.0015	-29.9072	-21.6064	-13.916	-5.7373	6.53076	18.4937	29.8462	44.8608	68.4204	102.966	-100.159	-80.1392	-60.1196	-40.0696	-20.0806	0	20.0195	40.1001	60.0891	80.0476	100.098
161.8	-39.0015	-29.9072	-21.5454	-13.916	-5.67627	6.46973	18.4937	29.9072	44.8608	68.5425	103.027	-100.159	-80.0781	-60.0281	-40.0696	-20.0806	30.5176	19.928	40.0391	60.0586	80.0781	100.037
161.9	-39.0015	-29.9683	-21.4844	-13.916	-5.61523	6.46973	18.4326	29.9683	44.8608	68.6035	103.088	-100.159	-80.0781	-60.0586	-40.0696	-20.0195	-30.5176	19.9585	40.0085	59.9976	80.0781	100.037
162	-39.0015	-29.9683	-21.4844	-13.977	-5.5542	6.53076	18.3105	29.9683	44.8608	68.7256	103.149	-100.159	-80.1086	-60.0586	-40.0696	-20.0195	-61.0352	19.8975	39.9475	60.0281	80.0171	100.037
162.1	-39.0015	-29.9683	-21.4233	-14.0381	-5.5542	6.5918	18.3105	29.9072	44.8608	68.7866	103.149	-100.128	-80.0781	-60.0891	-40.1001	-20.05	-30.5176	19.9585	39.978	60.0281	80.0476	100.067
162.2	-38.9404	-29.9683	-21.4233	-14.0991	-5.5542	6.65283	18.3716	29.9072	44.7388	68.7866	103.21	-100.128	-80.0781	-60.0891	-40.0085	-20.0806	-30.5176	20.05	40.0085	59.9976	80.1086	100.189
162.3	-38.9404	-29.9683	-21.4844	-14.0991	-5.61523	6.65283	18.4326	30.0293	44.6777	68.6645	103.149	-100.128	-80.0781	-60.1196	-40.0391	-20.0806	30.5176	19.989	40.0085	60.0586	80.0476	100.128
162.4	-38.9404	-30.0293	-21.4844	-14.0991	-5.67627	6.71387	18.4937	30.0903	44.6777	68.5425	103.149	-100.128	-80.0171	-60.1196	-40.0391	-20.0195	30.5176	19.989	39.9475	60.0891	80.0781	100.098
162.5	-38.9404	-30.0903	-21.5454	-14.1602	-5.7373	6.65283	18.4937	30.2124	44.7998	68.4814	102.966	-100.128	-80.1086	-60.0891	-40.0696	-19.9585	0	19.989	40.0391	60.0891	80.0476	100.037
162.6	-38.8184	-30.1514	-21.5454	-14.2212	-5.7373	6.65283	18.4937	30.2124	44.8608	68.5425	102.966	-100.128	-80.0781	-60.0891	-40.1001	-19.989	-61.0352	19.9585	40.0391	60.0891	80.0171	100.037
162.7	-38.7573	-30.1514	-21.6064	-14.2822	-5.7373	6.5918	18.5547	30.2734	44.9219	68.6645	103.027	-100.128	-80.1086	-60.0586	-40.0696	-20.0195	-30.5176	19.928	39.978	60.0281	80.0781	100.037
162.8	-38.7573	-30.2124	-21.6675	-14.2822	-5.7373	6.53076	18.5547	30.2124	44.9219	68.7866	103.088	-100.067	-80.0781	-60.0586	-40.0085	-20.0195	-30.5176	19.9585	40.0085	60.0586	80.0476	100.128
162.9	-38.7573	-30.3345	-21.6675	-14.2822	-5.79834	6.53076	18.5547	30.2124	44.9219	68.7866	103.149	-100.098	-80.1086	-60.0891	-40.0085	-20.05	-61.0352	19.989	40.0391	60.0281	80.0171	100.159
163	-38.8184	-30.3955	-21.6064	-14.2212	-5.79834	6.5918	18.5547	30.1514	44.9219	68.7256	103.088	-100.067	-80.0781	-60.0586	-40.0391	-20.0195	30.5176	20.0195	39.978	60.0586	80.0476	100.128
163.1	-38.8794	-30.4565	-21.4844	-14.1602	-5.85937	6.71387	18.6157	30.1514	44.8608	68.6645	103.027	-100.098	-80.1392	-60.0891	-40.0391	-20.0195	0	20.0195	40.0391	60.0586	79.9866	100.128
163.2	-38.9404	-30.4565	-21.3623	-14.1602	-5.85937	6.7749	18.6157	30.1514	44.8608	68.6645	102.966	-100.128	-80.1086	-60.0891	-40.0696	-20.0195	30.5176	19.989	40.0085	60.0281	80.0171	100.067
163.3	-39.1235	-30.4565	-21.3013	-14.0991	-5.79834	6.7749	18.6157	30.1514	44.7998	68.6035	102.966	-100.159	-80.0781	-60.1196	-40.0085	-20.0195	0	19.9585	39.978	60.0586	80.0781	100.098
163.4	-39.1846	-30.4565	-21.3623	-14.0991	-5.7373	6.71387	18.5547	30.0903	44.7998	68.6035	103.027	-100.128	-80.1392	-60.0586	-40.0391	-20.0806	30.5176	19.989	40.0391	60.0281	80.0781	100.067
163.5	-39.2456	-30.4565	-21.3623	-14.0381	-5.67627	6.71387	18.4937	30.0293	44.7998	68.6645	103.088	-100.159	-80.1697	-60.0891	-40.0391	-20.0195	30.5176	19.9585	40.0696	59.9976	80.1392	100.098
163.6	-39.3066	-30.4565	-21.4233	-14.0381	-5.61523	6.71387	18.4937	30.0293	44.8608	68.7256	103.21	-100.128	-80.1392	-60.0281	-40.1001	-20.0195	-30.5176	19.9585	40.0391	60.0586	80.1086	100.159
163.7	-39.3066	-30.4565	-21.5454	-14.0991	-5.5542	6.71387	18.5547	30.0903	44.9219	68.7256	103.333	-100.128	-80.1086	-60.0586	-40.1001	-20.05	0	19.9585	40.0391	60.1196	80.0781	100.128
163.8	-39.3066	-30.4565	-21.7285	-14.1602	-5.5542	6.7749	18.6157	30.0903	44.9829	68.7866	103.394	-100.128	-80.0781	-60.0586	-40.0391	-19.989	-30.5176	20.0195	40.0085	60.0281	80.0171	100.159
163.9	-39.2456	-30.4565	-21.8506	-14.2212	-5.61523	6.89697	18.6768	30.1514	45.105	68.7866	103.455	-100.189	-80.0781	-60.1196	-40.0696	-20.0195	0	19.989	40.0085	60.0281	80.0781	100.098
164	-39.2456	-30.4565	-21.8506	-14.2212	-5.67627	6.89697	18.6768	30.1514	45.227	68.7256	103.577	-100.128	-80.0781	-60.0891	-40.0391	-20.0195	0	20.0195	40.0696	60.0586	80.0476	100.128
164.1	-39.3066	-30.5176	-21.8506	-14.2212	-5.79834	6.83594	18.6768	30.2124	45.3491	68.7256	103.638	-100.189	-80.1697	-60.0891	-40.0391	-20.0195	0	20.0195	40.0391	60.0281	80.0476	100.067
164.2	-39.3677	-30.5786	-21.8506	-14.2212	-5.92041	6.7749	18.6768	30.2734	45.4102	68.7256	103.699	-100.159	-80.2002	-60.0281	-40.0391	-20.05	30.5176	19.989	40.0696	60.0586	80.0781	100.128
164.3	-39.3677	-30.6396	-21.7895	-14.2212	-5.92041	6.7749	18.6768	30.2734	45.4712	68.7866	103.699	-100.189	-80.1392	-60.0586	-40.0391	-20.0195	0	19.8975	39.978	60.0281	80.0476	100.098
164.4	-39.3066	-30.7007	-21.7285	-14.2212	-5.92041	6.71387	18.6768	30.2734	45.4712	68.7866	103.638	-100.128	-80.1697	-60.0586	-40.1001	-20.0195	-30.5176	19.9585	40.0391	59.9976	80.0476	100.098
164.5	-39.2456	-30.7007	-21.6675	-14.2212	-5.79834	6.71387	18.6768	30.2124	45.4712	68.8477	103.516	-100.159	-80.1086	-60.0281	-40.0696	-20.0195	-30.5176	19.989	39.978	60.0281	80.0476	100.098
164.6	-39.1846	-30.7007	-21.6675	-14.2822	-5.7373	6.71387	18.6768	30.1514	45.4712	68.8477	103.455	-100.128	-80.0781	-60.0891	-40.0696	-20.0195	-61.0352	19.989	40.0085	60.0891	80.0476	100.159
164.7	-39.1235	-30.6396	-21.6675	-14.2822	-5.7373	6.65283	18.6768	30.0903	45.4712	68.7866	103.455	-100.128	-80.1392	-60.0281	-40.0696	-20.05	-30.5176	20.0195	40.0085	60.0586	80.0171	100.159
164.8	-39.1235	-30.6396	-21.7285	-14.2822	-5.7373	6.65283	18.6768	30.0903	45.4712	68.7866	103.516	-100.128	-80.1086	-59.9976	-40.1001	-20.0195	-30.5176	20.0195	39.978	60.0586	80.0171	100.098
164.9	-39.1846	-30.6396	-21.7895	-14.3433	-5.7373	6.65283	18.6157	30.0293	45.5322	68.7866	103.516	-100.159	-80.1086	-60.0281	-40.0391	-20.0195	-61.0352	19.9585	39.978	60.0586	80.0171	100.067
165	-39.3066	-30.6396	-21.7895	-14.4043	-5.7373	6.65283	18.6157	29.9683	45.5322	68.8477	103.577	-100.159	-80.1086	-60.0586	-40.1001	-19.989	-61.0352	19.9585	40.0085	60.0891	80.0171	100.128
165.1	-39.4287	-30.6396	-21.8506	-14.4043	-5.79834	6.65283	18.6157	29.9683	45.5933	68.8477	103.577	-100.159	-80.1392	-60.0586	-40.1001	-20.05	-91.5527	19.928	40.0391	60.0586	80.0171	100.098
165.2	-39.4897	-30.7007	-21.8506	-14.3433	-5.7373	6.65283	18.6157	30.0293	45.5933	68.9087	103.577	-100.159	-80.1392	-60.0586	-40.1001	-20.0806	-91.5527	20.0195	40.0391	60.0891	80.0781	100.128
165.3	-39.4897	-30.7617	-21.9116	-14.2822	-5.7373	6.65283	18.6157	30.0903	45.5933	68.8477	103.638	-100.128	-80.1392	-60.0586	-40.1001	-20.1111	0	19.989	39.978	60.0891	80.0781	100.128
165.4	-39.5508	-30.7617	-21.9727	-14.2212	-5.7373	6.5918	18.6768	30.1514	45.5322	68.7256	103.577	-100.098	-80.1392	-60.0281	-40.1001	-20.05	-61.0352	19.928	40.0085	60.0281	80.0781	100.098
165.5	-39.6118	-30.7007	-22.0337	-14.2212	-5.7373	6.65283	18.6768	30.1514	45.4712	68.6645	103.455	-100.189	-80.1392	-59.9976	-40.0391	-20.0195	-61.0352	19.9585	39.9475	60.0586	80.0476	100.067
165.6	-39.6118	-30.5786	-22.0947	-14.3433	-5.7373	6.71387	18.6157	30.1514	45.4102	68.6035	103.271	-100.128	-80.1392	-60.0586	-40.1001	-19.989	-30.5176	19.989	40.0085	60.0891	80.0476	100.098
165.7	-39.6118	-30.4565	-22.0947	-14.4653	-5.79834	6.7749	18.6157	30.1514	45.3491	68.6035	103.21	-100.189	-80.0781	-60.0891	-40.1001	-20.0195	-30.5176	20.0195	40.0391	60.0891	80.0781	100.189
165.8	-39.5508	-30.2734	-22.0947	-14.4653	-5.7373	6.7749	18.6157	30.0903	45.4102	68.5425	103.149	-100.159	-80.1697	-60.0891	-40.0391	-20.0806	0	19.989	40.0391	60.1196	80.0476	100.159
165.9	-39.5508	-30.1514	-22.0947	-14.4653	-5.67627	6.7749	18.6768	30.0903	45.4102	68.4814	103.149	-100.128	-80.1697	-60.0281	-40.0696	-20.0806	-30.5176	19.9585	39.978	60.0891	80.1086	100.098
166	-39.4897	-30.2124	-22.0337	-14.4653	-5.61523	6.7749	18.7378	30.0903	45.4102	68.4204	103.21	-100.098	-80.1086	-60.0281	-40.1306	-20.0195	-61.0352	19.8975	39.978	60.0281	80.0781	100.067
166.1	-39.4897	-30.3345	-22.0337	-14.4043	-5.5542	6.7749	18.7378	30.0903	45.4102	68.2983	103.271	-100.128	-80.0781	-59.9976	-40.1306	-20.05	-91.5527	19.928	39.9475	60.0281	80.0476	100.037
166.2	-39.4897	-30.3345	-21.9727	-14.3433	-5.5542	6.71387	18.7378	30.0293	45.4712	68.3594	103.394	-100.159	-80.0781	-60.0891	-40.1611	-20.0195	-61.0352	19.9585	40.0085	60.0586	80.0476	100.128
166.3	-39.4897	-30.3955	-21.9116	-14.2822	-5.5542	6.71387	18.6768	30.0293	45.5322	68.3594	103.455	-100.128	-80.0781	-60.0891	-40.1001	-20.1111	-30.5176	20.0195	40.0696	60.1196	80.0476	100.159
166.4	-39.4897	-30.4565	-21.9727	-14.2212	-5.5542	6.71387	18.6768	29.9683	45.5322	68.4204	103.394	-100.098	-80.1392	-60.0281	-40.0696	-19.989	-30.5176	19.928	39.9475	60.1196	80.1086	100.128
166.5	-39.4897	-30.5176	-21.9116	-14.1602	-5.61523	6.71387	18.6768	29.9683	45.5933	68.3594	103.333	-100.098	-80.1086	-60.0281	-40.0391	-20.0195	0	19.9585	39.9475	60.0891	80.0781	100.128
166.6	-39.5508	-30.5786	-21.9727	-14.0991	-5.61523	6.71387	18.6157	29.9683	45.5322	68.2983	103.21	-100.189	-80.1086	-60.0281	-40.0696	-20.0195	-30.5176	19.928	39.978	60.0586	80.0171	100.037
166.7	-39.5508	-30.5786	-21.9727	-14.0381	-5.67627	6.71387	18.5547	29.8462	45.5322	68.2373	103.149	-100.189	-80.1392	-60.0891	-40.1306	-20.05	-61.0352	19.9585	40.0391	60.0586	80.0171	100.098
166.8	-39.6118	-30.5786	-21.9727	-14.0381	-5.7373	6.71387	18.4937	29.7852	45.5322	68.1763	103.149	-100.189	-80.1086	-59.9976	-40.1611	-20.0806	-61.0352	19.9585	40.0391	60.0586	80.0781	100.128
166.9	-39.6118	-30.5786	-21.9116	-14.0381	-5.7373	6.71387	18.4326	29.6631	45.5322	68.1763	103.088	-100.128	-80.1392	-60.0891	-40.0696	-20.0806	-30.5176	19.9585	39.978	60.0891	80.0476	100.189
167	-39.6118	-30.5176	-21.9116	-14.0381	-5.79834	6.65283	18.4326	29.6631	45.5322	68.1763	103.149	-100.098	-80.1392	-60.0281	-40.0391	-20.0806	-30.5176	19.9585	39.9475	60.1196	80.1086	100.098
167.1	-39.6728	-30.5176	-21.8506	-14.0381	-5.79834	6.65283	18.5547	29.6631	45.4712	68.1763	103.149	-100.098	-80.1392	-59.9976	-39.978	-20.05	0	19.8669	39.9475	60.0586	80.1086	100.098
167.2	-39.6728	-30.4565	-21.9116	-14.0991	-5.7373	6.5918	18.5547	29.6631	45.5322	68.1763	103.149	-100.159	-80.1086	-60.0586	-40.0085	-20.0195	0	19.928	39.9475	60.0891	80.0171	100.128
167.3	-39.6728	-30.5176	-21.9116	-14.1602	-5.67627	6.5918	18.5547	29.7241	45.5322	68.1763	103.149	-100.159	-80.1086	-60.0891	-40.1001	-20.0195	0	20.0195	40.0391	60.0586	80.0476	100.159
167.4	-39.6118	-30.5786	-21.9727	-14.1602	-5.61523	6.53076	18.5547	29.6631	45.5322	68.2373	103.088	-100.159	-80.1086	-60.1196	-40.1001	-20.0195	30.5176	19.989	40.0696	60.1196	80.0476	100.098
167.5	-39.6118	-30.7007	-22.0337	-14.2212	-5.67627	6.53076	18.4937	29.602	45.6543	68.2983	103.027	-100.159	-80.1697	-60.0586	-40.0696	-20.05	30.5176	19.989	39.9475	60.0891	80.0781	100.128
167.6	-39.5508	-30.7617	-22.0337	-14.2212	-5.7373	6.5918	18.4937	29.48	45.7153	68.2983	102.966	-100.098	-80.1392	-60.0586	-40.0696	-20.0806	0	19.928	39.9475	60.0281	80.1392	100.128
167.7	-39.4897	-30.8228	-22.0337	-14.2822	-5.79834	6.5918	18.4326	29.48	45.8374	68.4204	103.027	-100.128	-80.1697	-59.9976	-40.0391	-20.0806	-30.5176	19.8975	39.9475	59.9976	80.0476	100.067
167.8	-39.4287	-30.8838	-22.0337	-14.2822	-5.79834	6.65283	18.3105	29.48	45.8374	68.4814	103.027	-100.128	-80.0781	-60.0281	-40.1001	-20.05	-91.5527	19.9585	40.0085	60.0586	80.0171	100.128
167.9	-39.3677	-30.8838	-21.9727	-14.2822	-5.85937	6.71387	18.2495	29.4189	45.8984	68.6035	103.027	-100.128	-80.0171	-60.1196	-40.1001	-20.0195	-30.5176	19.989	39.978	60.0891	80.0476	100.159
168	-39.4287	-30.8228	-21.9727	-14.2822	-5.85937	6.7749	18.1885	29.3579	45.8984	68.6035	103.027	-100.159	-80.0781	-60.0891	-40.1001	-20.05	0	20.0195	40.0085	60.0891	80.0476	100.159
168.1	-39.4897	-30.7617	-22.0337	-14.2822	-5.79834	6.83594	18.2495	29.3579	45.9595	68.6035	103.088	-100.098	-80.1392	-60.0586	-40.0391	-20.05	0	19.989	39.9475	60.0891	80.1086	100.189
168.2	-39.5508	-30.7617	-22.0337	-14.2822	-5.7373	6.7749	18.3105	29.3579	46.0815	68.5425	103.149	-100.128	-80.1392	-60.0281	-40.1001	-20.0195	0	19.989	39.978	60.0586	80.0781	100.128
168.3	-39.6118	-30.7617	-22.0947	-14.3433	-5.67627	6.71387	18.4326	29.3579	46.0815	68.4814	103.21	-100.159	-80.1086	-60.0891	-40.0696	-20.0195	-61.0352	19.9585	39.978	60.0586	80.0476	100.098
168.4	-39.6118	-30.7617	-22.1558	-14.3433	-5.61523	6.5918	18.4937	29.4189	46.0815	68.4204	103.271	-100.159	-80.1086	-60.0586	-40.0696	-19.9585	-91.5527	19.9585	40.0085	60.0891	80.0476	100.067
168.5	-39.5508	-30.7617	-22.1558	-14.2822	-5.61523	6.53076	18.5547	29.4189	46.0815	68.3594	103.271	-100.159	-80.1392	-60.0281	-40.1001	-20.05	-30.5176	19.989	40.0391	60.0586	80.0476	100.128
168.6	-39.4897	-30.8228	-22.2168	-14.2212	-5.5542	6.53076	18.5547	29.4189	45.9595	68.3594	103.21	-100.128	-80.1392	-60.0586	-40.0085	-20.1416	-30.5176	19.989	40.0085	60.0891	80.0781	100.098
168.7	-39.4287	-30.8838	-22.1558	-14.1602	-5.5542	6.53076	18.5547	29.4189	45.9595	68.3594	103.21	-100.067	-80.0476	-60.0281	-40.0391	-20.05	-61.0352	19.9585	39.978	60.0586	80.0781	100.098
168.8	-39.4897	-30.9448	-22.1558	-14.1602	-5.5542	6.5918	18.4937	29.4189	45.8984	68.3594	103.149	-100.128	-80.1086	-60.0586	-40.0085	-19.989	-61.0352	19.989	39.978	60.0586	80.0476	100.098
168.9	-39.4897	-31.0059	-22.0947	-14.2212	-5.5542	6.5918	18.4326	29.4189	45.8984	68.3594	103.088	-100.128	-80.0781	-60.0891	-40.0696	-20.05	0	19.989	40.0391	60.0586	80.0171	100.128
169	-39.5508	-31.0669	-22.0337	-14.2822	-5.5542	6.65283	18.4326	29.3579	45.8984	68.3594	103.027	-100.159	-80.1086	-60.1196	-40.0391	-20.0195	0	19.989	40.0696	60.0586	79.9866	100.128
169.1	-39.4897	-31.0059	-22.0337	-14.3433	-5.61523	6.65283	18.4937	29.3579	45.8984	68.3594	102.966	-100.189	-80.2002	-60.0891	-40.0391	-20.0195	0	19.989	40.0696	60.0586	80.0476	100.159
169.2	-39.4897	-31.0669	-22.0337	-14.4043	-5.61523	6.5918	18.4937	29.4189	45.8984	68.2983	102.905	-100.189	-80.1392	-60.0586	-40.1001	-20.05	0	19.989	40.0391	60.0586	80.1086	100.128
169.3	-39.3677	-31.1279	-22.0947	-14.4043	-5.67627	6.53076	18.4326	29.4189	45.8984	68.3594	102.783	-100.159	-80.0476	-60.0281	-40.1001	-20.0195	-30.5176	19.9585	39.978	60.1196	80.0781	100.067
169.4	-39.2456	-31.189	-22.0947	-14.4043	-5.67627	6.53076	18.3716	29.48	45.8984	68.4204	102.661	-100.159	-80.1086	-60.0586	-40.1001	-20.0195	-61.0352	19.9585	40.0085	60.0891	80.0781	100.067
169.5	-39.2456	-31.189	-22.1558	-14.2822	-5.67627	6.46973	18.3716	29.4189	45.8984	68.4204	102.6	-100.159	-80.0781	-60.0891	-40.0696	-20.05	-61.0352	19.989	39.978	60.0281	80.0171	100.128
169.6	-39.2456	-31.189	-22.0947	-14.2212	-5.61523	6.46973	18.3716	29.4189	45.8984	68.4204	102.6	-100.128	-80.0476	-60.1196	-40.0696	-19.989	-30.5176	19.9585	39.978	60.0891	80.0781	100.098
169.7	-39.2456	-31.25	-22.0947	-14.1602	-5.61523	6.53076	18.4326	29.4189	45.8984	68.4814	102.661	-100.159	-80.1086	-60.0891	-40.0696	-19.989	-30.5176	19.989	40.0696	60.0891	80.0781	100.098
169.8	-39.2456	-31.311	-22.1558	-14.0991	-5.5542	6.53076	18.4326	29.4189	45.8374	68.4814	102.661	-100.128	-80.1392	-60.1196	-40.1001	-20.0195	-30.5176	20.0195	40.0391	60.0891	80.0476	100.159
169.9	-39.3066	-31.3721	-22.2168	-14.2212	-5.49316	6.5918	18.4326	29.48	45.7764	68.4814	102.661	-100.128	-80.1086	-60.1196	-40.0391	-20.0195	0	19.928	39.978	60.0281	80.0781	100.098
170	-39.3066	-31.3721	-22.2778	-14.3433	-5.49316	6.65283	18.4326	29.48	45.7153	68.4814	102.6	-100.128	-80.0781	-60.0586	-40.0696	-19.989	0	19.928	40.0085	60.0586	80.0781	100.037
170.1	-39.4287	-31.3721	-22.2168	-14.4653	-5.49316	6.5918	18.4326	29.48	45.7153	68.5425	102.478	-100.098	-80.0781	-60.0586	-40.0696	-20.05	-61.0352	19.9585	40.0085	60.0586	80.0476	100.098
170.2	-39.4897	-31.3721	-22.1558	-14.4043	-5.49316	6.46973	18.3716	29.541	45.7153	68.6035	102.356	-100.189	-80.0781	-60.0891	-40.0391	-20.0195	-30.5176	19.928	40.0391	59.9976	80.0476	100.128
170.3	-39.5508	-31.4331	-22.0947	-14.3433	-5.49316	6.34766	18.3105	29.6631	45.8374	68.6645	102.295	-100.128	-80.0781	-60.0891	-40.0391	-20.0195	-30.5176	19.989	40.0391	60.0586	80.0476	100.128
170.4	-39.5508	-31.4941	-22.0337	-14.2212	-5.49316	6.34766	18.2495	29.602	45.9595	68.6645	102.356	-100.159	-80.0476	-60.1196	-40.0696	-20.05	30.5176	20.0195	39.978	60.0586	80.0171	100.128
170.5	-39.4287	-31.4331	-22.0337	-14.2212	-5.49316	6.40869	18.1885	29.541	45.9595	68.7256	102.356	-100.128	-80.1086	-60.0891	-40.0696	-19.989	-30.5176	19.989	40.0085	60.0891	80.0476	100.128
170.6	-39.3677	-31.4331	-22.0337	-14.2212	-5.43213	6.40869	18.1885	29.48	45.9595	68.6645	102.539	-100.128	-80.0781	-60.0891	-40.1001	-20.0195	0	19.9585	39.978	60.0891	80.0781	100.037
170.7	-39.3066	-31.4331	-22.0337	-14.2212	-5.43213	6.40869	18.1885	29.4189	45.9595	68.4814	102.661	-100.159	-80.1392	-60.0586	-40.0391	-20.0195	-30.5176	19.9585	39.978	59.9976	80.0476	100.128
170.8	-39.2456	-31.4331	-22.0947	-14.2212	-5.43213	6.40869	18.1885	29.3579	46.0205	68.3594	102.6	-100.159	-80.0781	-60.0586	-40.0696	-20.0195	0	19.928	40.0085	60.1196	80.0476	100.067
170.9	-39.3066	-31.4941	-22.0947	-14.2212	-5.49316	6.34766	18.1274	29.3579	46.0815	68.2983	102.539	-100.159	-80.0476	-60.0891	-40.0391	-20.0806	0	20.0195	40.0391	60.0281	80.0781	100.098
171	-39.3677	-31.4941	-22.1558	-14.1602	-5.49316	6.34766	18.1274	29.3579	46.1426	68.2983	102.6	-100.128	-80.0781	-60.0891	-40.0696	-20.0195	30.5176	19.989	40.0085	60.0891	80.0781	100.098
171.1	-39.3677	-31.4941	-22.1558	-14.1602	-5.5542	6.34766	18.0664	29.2969	46.2036	68.2983	102.722	-100.128	-80.0781	-60.0891	-40.0696	-20.0195	-30.5176	19.9585	40.0391	60.1196	80.0476	100.098
171.2	-39.3066	-31.5552	-22.0337	-14.2212	-5.61523	6.46973	18.0664	29.2969	46.2646	68.3594	102.844	-100.098	-80.0781	-60.0891	-39.978	-20.0195	0	19.989	39.9475	60.0586	80.0476	100.098
171.3	-39.2456	-31.6162	-21.9727	-14.2822	-5.61523	6.46973	18.0664	29.2969	46.2646	68.3594	102.905	-100.128	-80.0781	-60.0891	-40.0696	-19.989	30.5176	19.989	40.0085	60.0586	80.0476	100.098
171.4	-39.1846	-31.6162	-21.9116	-14.2822	-5.61523	6.46973	18.0664	29.2358	46.2646	68.2983	102.905	-100.128	-80.1392	-60.0891	-40.0391	-20.0195	-30.5176	19.9585	40.0391	60.0586	80.0476	100.067
171.5	-39.1846	-31.5552	-21.8506	-14.3433	-5.61523	6.34766	18.0664	29.1748	46.2646	68.1763	102.905	-100.159	-80.1086	-60.0891	-40.0085	-19.989	30.5176	19.989	40.0085	60.0586	80.0476	100.098
171.6	-39.2456	-31.4941	-21.7895	-14.4043	-5.5542	6.28662	18.0664	29.1748	46.2646	67.9932	102.966	-100.159	-80.0781	-60.1196	-40.0696	-19.989	30.5176	20.0806	40.0696	60.0891	80.0781	100.098
171.7	-39.2456	-31.4941	-21.7285	-14.4653	-5.5542	6.22559	18.0664	29.2358	46.2036	67.8711	103.027	-100.159	-80.0781	-60.0891	-40.0391	-20.0195	30.5176	19.989	40.0085	60.0281	80.0171	100.067
171.8	-39.2456	-31.4941	-21.6675	-14.4653	-5.49316	6.22559	18.0664	29.2969	46.2036	67.8711	103.088	-100.128	-80.0781	-60.0586	-40.0391	-20.05	-30.5176	20.0195	40.0391	60.0586	80.0781	100.098
171.9	-39.1846	-31.5552	-21.6064	-14.5264	-5.49316	6.28662	18.0664	29.2969	46.2036	67.8101	103.149	-100.22	-80.0781	-60.0891	-40.0391	-20.0195	0	19.989	39.978	59.9976	80.0476	100.098
172	-39.1235	-31.5552	-21.6064	-14.4653	-5.49316	6.40869	18.1274	29.3579	46.2646	67.8711	103.149	-100.128	-80.1086	-60.0891	-40.0391	-20.0806	0	20.0195	39.978	60.0586	80.0476	100.098
172.1	-39.1235	-31.6162	-21.5454	-14.4653	-5.49316	6.46973	18.1274	29.4189	46.2646	67.8711	103.149	-100.159	-80.0781	-60.1196	-40.0696	-20.0195	-61.0352	20.0195	40.0696	60.0281	80.0476	100.098
172.2	-39.1846	-31.6162	-21.5454	-14.4043	-5.49316	6.53076	18.1274	29.4189	46.2036	67.8101	103.027	-100.128	-80.1392	-60.0891	-40.0391	-20.05	0	20.0195	40.0696	60.0281	80.0171	100.128
172.3	-39.1846	-31.6162	-21.4844	-14.4043	-5.5542	6.46973	18.1274	29.4189	46.1426	67.8101	102.966	-100.159	-80.0781	-60.1196	-40.0696	-19.989	61.0352	20.0195	40.0696	60.0891	80.0171	100.098
172.4	-39.1846	-31.6162	-21.4844	-14.4043	-5.5542	6.46973	18.1885	29.4189	46.0815	67.749	102.966	-100.159	-80.0781	-60.0891	-40.0391	-20.0806	0	19.989	39.978	60.0281	80.0476	100.098
172.5	-39.1235	-31.5552	-21.5454	-14.4043	-5.5542	6.40869	18.2495	29.4189	46.0815	67.8101	103.088	-100.159	-80.0476	-60.0891	-40.0696	-20.0195	30.5176	19.928	39.978	60.0586	80.1392	100.098
172.6	-39.0625	-31.5552	-21.4844	-14.4043	-5.61523	6.34766	18.1885	29.4189	46.0205	67.8101	103.21	-100.159	-80.0781	-60.1501	-40.0391	-20.0195	0	19.989	40.0391	59.9976	80.0476	100.098
172.7	-39.0015	-31.5552	-21.4844	-14.4653	-5.61523	6.34766	18.1885	29.48	45.9595	67.8711	103.333	-100.128	-80.0781	-60.1501	-40.0696	-20.0195	0	19.989	40.0696	60.0281	80.0476	100.128
172.8	-39.0015	-31.5552	-21.4233	-14.5264	-5.5542	6.40869	18.1274	29.48	45.8984	67.9321	103.333	-100.159	-80.0476	-60.0586	-40.0391	-20.0195	0	20.0195	40.0391	60.0586	80.0171	100.128
172.9	-38.9404	-31.5552	-21.4844	-14.5264	-5.5542	6.40869	18.0664	29.3579	45.8374	67.9932	103.271	-100.128	-80.0476	-60.1501	-40.0391	-20.0195	30.5176	20.0195	40.0391	60.0891	80.0171	100.098
173	-38.8794	-31.4941	-21.4844	-14.5264	-5.5542	6.46973	18.0664	29.2969	45.8374	68.0542	103.21	-100.159	-80.0781	-60.0891	-40.0085	-20.0195	61.0352	19.989	40.0391	60.0281	79.9866	100.067
173.1	-38.8184	-31.4941	-21.5454	-14.4653	-5.5542	6.46973	18.0664	29.2358	45.8374	68.0542	103.149	-100.128	-80.0476	-60.1196	-40.0391	-20.0195	30.5176	19.9585	40.0696	60.0586	80.0476	100.098
173.2	-38.8184	-31.5552	-21.5454	-14.4653	-5.5542	6.46973	18.0054	29.3579	45.8984	68.0542	103.088	-100.189	-80.0476	-60.1196	-40.0391	-19.9585	-61.0352	19.989	40.1001	60.0281	80.0476	100.098
173.3	-38.8794	-31.6162	-21.5454	-14.4653	-5.5542	6.46973	17.9443	29.4189	45.8984	67.9932	103.027	-100.159	-80.1086	-60.0891	-40.0696	-19.9585	0	19.989	40.1001	60.0586	80.0476	100.067
173.4	-39.0015	-31.6162	-21.4844	-14.5264	-5.5542	6.40869	18.0054	29.541	45.9595	67.9932	102.966	-100.098	-80.0781	-60.0891	-40.0391	-20.0195	-30.5176	20.0195	40.1001	60.0891	80.0476	100.128
173.5	-39.1235	-31.5552	-21.4233	-14.5264	-5.5542	6.40869	18.0054	29.602	46.0205	67.9321	102.966	-100.128	-80.0781	-60.1196	-40.0085	-20.0195	-30.5176	19.928	40.0085	60.0281	80.0476	100.098
173.6	-39.1846	-31.4941	-21.4233	-14.5874	-5.61523	6.34766	18.0664	29.602	46.0815	67.9932	102.966	-100.128	-80.0476	-60.0891	-40.0696	-20.0195	-30.5176	19.989	40.0085	60.0281	80.0476	100.098
173.7	-39.2456	-31.4331	-21.4233	-14.5874	-5.7373	6.28662	18.0054	29.541	46.1426	67.9932	102.966	-100.128	-80.1086	-60.0586	-40.0085	-19.8975	0	20.0195	40.0391	59.967	80.0171	100.098
173.8	-39.2456	-31.4331	-21.4233	-14.6484	-5.7373	6.28662	18.0054	29.48	46.1426	68.0542	102.966	-100.128	-80.0476	-60.1196	-40.0391	-19.9585	0	20.05	40.1001	60.1196	79.9866	100.098
173.9	-39.1846	-31.4941	-21.3013	-14.5874	-5.7373	6.28662	18.0054	29.4189	46.1426	68.1763	103.027	-100.128	-80.0476	-60.1501	-40.0085	-19.989	30.5176	20.05	40.1001	60.0891	80.0171	100.128
174	-39.1846	-31.5552	-21.1792	-14.5264	-5.7373	6.28662	18.0054	29.3579	46.0815	68.1763	103.088	-100.128	-80.0476	-60.0891	-40.0085	-20.05	61.0352	19.989	40.0391	60.0891	80.0476	100.128
174.1	-39.1235	-31.4941	-21.0571	-14.5264	-5.7373	6.28662	18.0054	29.4189	45.9595	68.1763	103.149	-100.159	-80.1086	-60.0891	-40.0696	-19.989	0	19.9585	40.0085	60.0586	80.0476	100.037
174.2	-39.0625	-31.3721	-21.1182	-14.5264	-5.67627	6.22559	18.0664	29.541	45.8984	68.1763	103.149	-100.128	-80.0476	-60.0891	-40.0085	-19.989	-61.0352	19.928	40.0391	59.967	80.0476	100.037
174.3	-38.9404	-31.311	-21.2402	-14.5264	-5.61523	6.22559	18.1274	29.6631	45.8374	68.1152	103.21	-100.128	-80.0476	-60.0891	-40.0696	-19.9585	-30.5176	19.9585	40.0696	60.0281	80.0171	100.098
174.4	-38.8794	-31.311	-21.3013	-14.5264	-5.61523	6.22559	18.1885	29.7852	45.8374	68.1152	103.271	-100.159	-80.0476	-60.0891	-40.0696	-19.989	0	19.989	40.1001	60.0281	80.0781	100.098
174.5	-38.8794	-31.25	-21.3623	-14.4653	-5.61523	6.22559	18.1274	29.7852	45.7764	68.1152	103.394	-100.098	-80.0476	-60.1196	-40.0696	-20.0195	30.5176	19.989	40.0085	60.0891	80.0476	100.159
174.6	-38.8794	-31.25	-21.3013	-14.5264	-5.61523	6.22559	18.1274	29.7852	45.7764	68.1152	103.394	-100.128	-80.0476	-60.1196	-39.978	-20.0195	30.5176	20.05	39.978	60.0891	80.0476	100.098
174.7	-38.8794	-31.1279	-21.3013	-14.5264	-5.5542	6.22559	18.1274	29.7852	45.7764	68.1763	103.394	-100.128	-80.0781	-60.0891	-40.0391	-20.0195	0	19.989	40.0085	60.0281	80.0171	100.037
174.8	-38.8184	-31.1279	-21.2402	-14.5874	-5.49316	6.28662	18.1274	29.7241	45.7153	68.1763	103.455	-100.128	-80.0476	-60.0891	-40.0696	-19.989	0	20.0195	40.0085	59.9976	80.0171	100.037
174.9	-38.7573	-31.0669	-21.2402	-14.5874	-5.49316	6.34766	18.1885	29.7241	45.7153	68.2373	103.516	-100.189	-80.0781	-60.1501	-40.1001	-19.989	30.5176	20.0195	40.0696	59.9976	80.0781	100.037
175	-38.7573	-31.0669	-21.2402	-14.5264	-5.5542	6.34766	18.2495	29.6631	45.7153	68.2983	103.699	-100.159	-80.0476	-60.0891	-40.0391	-20.0195	30.5176	19.989	40.0696	60.0586	80.0476	100.037
175.1	-38.8184	-31.0669	-21.2402	-14.4653	-5.67627	6.28662	18.3105	29.602	45.7153	68.3594	103.821	-100.189	-80.0781	-60.0891	-40.0085	-20.05	0	19.989	40.0391	60.1196	80.0781	100.098
175.2	-38.8794	-31.0669	-21.2402	-14.4043	-5.7373	6.22559	18.3105	29.602	45.7764	68.3594	103.821	-100.159	-80.0781	-60.1196	-40.0085	-20.0195	0	20.0195	39.978	60.0586	80.0476	100.067
175.3	-38.9404	-31.189	-21.2402	-14.3433	-5.67627	6.10352	18.3716	29.541	45.7764	68.3594	103.821	-100.128	-80.0476	-60.0891	-39.978	-20.0195	30.5176	19.989	40.0391	60.0281	80.0781	100.067
175.4	-38.9404	-31.25	-21.2402	-14.2212	-5.61523	6.04248	18.4326	29.602	45.7764	68.4204	103.699	-100.128	-80.0476	-60.1501	-40.0696	-19.989	-91.5527	20.0195	40.0696	59.9976	80.0476	100.067
175.5	-38.9404	-31.4331	-21.2402	-14.1602	-5.49316	5.98144	18.4326	29.602	45.7764	68.4814	103.638	-100.067	-80.0171	-60.1196	-40.0696	-20.0195	30.5176	20.0195	40.0696	60.0891	80.0476	100.128
175.6	-39.0015	-31.4941	-21.2402	-14.0991	-5.49316	6.04248	18.4326	29.602	45.7153	68.6035	103.638	-100.128	-80.0781	-60.0891	-40.0391	-19.989	91.5527	20.05	40.0696	60.0891	80.0781	100.128
175.7	-39.0015	-31.4331	-21.2402	-14.0991	-5.43213	6.10352	18.3716	29.602	45.6543	68.7256	103.638	-100.159	-80.0781	-60.0891	-40.0391	-20.0195	30.5176	19.989	40.0696	60.0891	80.0476	100.037
175.8	-39.0015	-31.3721	-21.3013	-14.0991	-5.43213	6.22559	18.3716	29.6631	45.5933	68.7866	103.638	-100.159	-80.1086	-60.0891	-40.0391	-19.989	30.5176	19.9585	39.9475	59.967	80.0781	100.037
175.9	-39.0015	-31.25	-21.4233	-14.0991	-5.43213	6.34766	18.3716	29.7241	45.5933	68.9087	103.699	-100.159	-80.0476	-60.0891	-40.0696	-19.989	0	20.0195	39.978	60.0281	80.0171	99.9756
176	-39.0015	-31.1279	-21.4233	-14.0991	-5.49316	6.40869	18.4326	29.7852	45.7153	68.9697	103.76	-100.098	-80.0781	-60.1501	-40.0391	-19.989	0	19.989	40.0391	60.0586	80.0171	100.098
176.1	-38.9404	-31.0059	-21.4233	-14.0381	-5.5542	6.40869	18.4937	29.8462	45.7764	69.0918	103.882	-100.098	-80.0476	-60.1196	-40.0391	-19.989	30.5176	20.0806	40.0696	60.0281	80.0476	100.098
176.2	-38.9404	-30.8838	-21.4233	-14.0991	-5.5542	6.28662	18.4937	29.8462	45.7764	69.0918	103.882	-100.128	-80.0476	-60.0891	-39.9475	-20.05	30.5176	20.0195	40.0696	60.0891	80.0781	100.098
176.3	-38.8794	-30.8838	-21.4844	-14.0991	-5.49316	6.22559	18.4326	29.7852	45.7764	69.0918	103.882	-100.128	-80.0781	-60.1196	-40.0085	-20.0195	61.0352	20.0195	40.0085	60.0281	80.0781	100.098
176.4	-38.8794	-30.8228	-21.4844	-14.0381	-5.43213	6.16455	18.4326	29.8462	45.7764	69.0918	103.821	-100.159	-80.0781	-60.1196	-40.0391	-19.989	30.5176	20.0195	40.0696	59.9976	80.0476	100.037
176.5	-38.9404	-30.8228	-21.4233	-14.0381	-5.43213	6.16455	18.3716	29.8462	45.7764	69.1528	103.76	-100.128	-80.0476	-60.1501	-40.0085	-19.9585	-30.5176	20.0195	40.1001	60.0281	80.0476	100.037
176.6	-39.0015	-30.8838	-21.3623	-13.977	-5.49316	6.22559	18.3716	29.8462	45.8374	69.1528	103.699	-100.189	-80.1392	-60.1196	-40.0696	-19.989	-30.5176	20.0195	40.1001	60.0281	80.0476	100.067
176.7	-39.0625	-30.9448	-21.3013	-13.977	-5.49316	6.28662	18.3716	29.7852	45.8984	69.0918	103.699	-100.159	-80.1086	-60.0891	-40.0696	-20.05	0	19.989	40.0696	60.0586	80.0476	100.098
176.8	-39.0015	-31.0059	-21.3013	-14.0381	-5.5542	6.40869	18.3105	29.7241	45.9595	69.0918	103.699	-100.159	-80.0781	-60.0586	-40.0391	-20.0195	30.5176	19.9585	39.978	60.0586	80.0781	100.098
176.9	-38.9404	-31.0059	-21.3013	-14.0991	-5.5542	6.40869	18.3105	29.7852	45.9595	69.0308	103.699	-100.128	-80.0476	-60.0891	-39.978	-19.989	0	20.0195	40.0391	59.9976	80.0781	100.098
177	-38.9404	-31.0059	-21.3623	-14.2212	-5.49316	6.46973	18.3105	29.7852	46.0205	69.0308	103.638	-100.067	-80.0781	-60.1196	-40.0085	-19.989	0	20.05	39.978	60.0281	80.0476	100.037
177.1	-38.8794	-30.9448	-21.3623	-14.2822	-5.49316	6.46973	18.3105	29.8462	46.0815	69.0308	103.577	-100.128	-80.0476	-60.1501	-40.0085	-19.9585	61.0352	20.05	40.0696	60.0281	80.0171	100.067
177.2	-38.8794	-30.9448	-21.3623	-14.2822	-5.49316	6.46973	18.2495	29.8462	46.0815	68.9697	103.638	-100.098	-80.1392	-60.1196	-40.0391	-19.989	30.5176	20.0195	40.0696	60.0891	80.0171	100.128
177.3	-38.8184	-30.8228	-21.4233	-14.2212	-5.43213	6.46973	18.2495	29.8462	46.0815	68.9697	103.699	-100.128	-80.1392	-60.0891	-40.0391	-19.989	0	20.0195	40.1001	60.0586	80.0171	100.128
177.4	-38.7573	-30.7007	-21.5454	-14.2212	-5.49316	6.40869	18.1885	29.8462	46.1426	68.9697	103.76	-100.128	-80.0476	-60.0586	-40.0391	-20.0195	0	20.0195	40.0391	60.0281	80.0171	100.037
177.5	-38.7573	-30.6396	-21.6064	-14.2212	-5.49316	6.28662	18.1885	29.8462	46.1426	68.9697	103.821	-100.159	-80.0476	-60.0891	-40.0696	-20.05	-30.5176	19.989	40.0085	60.0281	80.0781	100.037
177.6	-38.8184	-30.5176	-21.6675	-14.1602	-5.49316	6.22559	18.1885	29.8462	46.2646	69.0308	103.76	-100.159	-80.0781	-60.0586	-40.0391	-20.0195	-30.5176	19.9585	40.0696	60.0281	80.0171	100.037
177.7	-38.8184	-30.5176	-21.6675	-14.1602	-5.49316	6.16455	18.1885	29.7852	46.3257	68.9697	103.699	-100.189	-80.0781	-60.1196	-40.0391	-19.9585	0	19.989	40.1001	60.0586	80.0476	100.098
177.8	-38.8794	-30.4565	-21.6675	-14.1602	-5.5542	6.16455	18.3105	29.7241	46.3257	68.9087	103.577	-100.128	-80.0781	-60.1196	-40.0391	-20.05	0	20.05	40.0696	60.0891	80.0781	100.128
177.9	-39.0015	-30.4565	-21.6675	-14.1602	-5.5542	6.16455	18.4326	29.6631	46.2646	68.9087	103.516	-100.067	-80.0171	-60.0281	-40.0391	-19.989	0	20.0195	40.1001	60.0586	80.0171	100.128
178	-30.5176	-23.0103	-15.2588	-9.27734	-2.62451	6.16455	15.8691	25.2686	40.3442	61.8286	95.6421	0.0305176	0	0	0.0305176	0.0305176	0	0	0	0	-0.0305176	0
178.1	62.3169	54.6265	46.0205	33.9355	21.6064	6.16455	-6.53076	-14.9536	-16.9678	-11.9019	7.38525	-0.0610352	0	0	-0.0610352	-0.0305176	0	-0.0305176	0	-0.0305176	-0.0305176	-0.0305176
178.2	240.723	199.402	156.921	109.68	62.5	6.16455	-45.166	-86.6089	-122.498	-151.184	-164.612	-0.0305176	-0.0305176	0.0305176	0	0	0	-0.0305176	0	-0.0305176	-0.0305176	0
178.3	400.269	326.599	252.319	173.523	95.459	6.10352	-77.2095	-148.437	-215.759	-276.611	-323.181	-0.0610352	0	-0.0305176	-0.0610352	-0.0305176	-61.0352	-0.0305176	0.0610352	0	-0.0610352	-0.0305176
178.4	476.685	385.986	295.593	201.538	108.582	6.10352	-91.0034	-177.307	-261.169	-339.539	-405.518	0	-0.0610352	0	-0.0305176	-0.0305176	0	0.0305176	0	0	-0.0305176	0.0305176
178.5	475.952	383.789	292.419	198.425	105.225	5.98144	-89.1113	-176.697	-262.512	-343.628	-414.124	0	-0.0305176	-0.0305176	0.0305176	-0.0610352	-61.0352	-0.0305176	0	0	0.0305176	0
178.6	434.875	349.915	265.93	179.871	94.2383	5.92041	-79.7119	-160.95	-240.662	-315.979	-381.775	0	-0.0305176	-0.0305176	-0.0305176	-0.0305176	-61.0352	-0.0305176	0	-0.0305176	0	0
178.7	385.62	309.998	235.352	158.997	82.5195	5.98144	-69.2139	-142.273	-213.684	-280.701	-338.806	0	0	-0.0305176	0.0305176	0	30.5176	-0.0305176	-0.0305176	0	-0.0305176	-0.0305176
178.8	344.36	276.672	209.961	141.785	73.1811	6.10352	-60.5469	-126.526	-190.613	-250.183	-301.086	-0.0305176	0	-0.0610352	0	-0.0305176	30.5176	-0.0305176	0.0305176	-0.0305176	-0.0610352	0.0305176
178.9	314.331	252.441	191.467	129.333	66.5283	6.16455	-54.2603	-114.868	-173.523	-227.417	-272.705	-0.0610352	0	0.0305176	-0.0305176	0	30.5176	-0.0610352	0	-0.0610352	0	-0.0305176
179	293.091	235.291	178.345	120.666	61.8896	6.22559	-49.8047	-106.262	-161.072	-210.937	-252.075	-0.0305176	-0.0305176	-0.0915527	-0.0305176	-0.0305176	30.5176	0	0	0	-0.0305176	-0.0610352
179.1	276.978	222.412	168.579	114.197	58.5327	6.16455	-46.4478	-99.7925	-151.489	-198.425	-236.45	-0.0305176	-0.0305176	0.0305176	-0.0610352	-0.0305176	-30.5176	-0.0305176	-0.0305176	0	0.0305176	0
179.2	263.672	211.853	160.706	108.765	55.7861	6.16455	-43.6401	-94.4214	-143.494	-187.927	-223.633	-0.0305176	-0.0305176	-0.0610352	-0.0610352	0.0305176	-61.0352	-0.0305176	-0.0610352	0.0305176	0	-0.0305176
179.3	251.953	202.515	153.87	104.004	53.4668	6.10352	-41.1987	-89.7217	-136.475	-178.528	-212.219	0	0.0305176	0.0305176	-0.0305176	-0.0305176	-61.0352	-0.0610352	0	-0.0610352	-0.0305176	-0.0610352
179.4	241.272	193.97	147.644	99.5483	51.3306	6.10352	-39.0015	-85.3882	-130.127	-169.983	-201.843	0	0.0305176	-0.0305176	-0.0305176	-0.0305176	-30.5176	-0.0305176	-0.0305176	-0.0305176	-0.0305176	-0.0305176
179.5	231.445	185.974	141.785	95.3979	49.3164	6.16455	-36.9873	-81.4209	-124.146	-162.109	-192.2	-0.0305176	0.0305176	-0.0305176	0.0305176	-0.0610352	30.5176	-0.0305176	0	0	0	0.0305176
179.6	222.29	178.467	136.169	91.4917	47.4243	6.16455	-35.0342	-77.6977	-118.469	-154.785	-183.166	-0.0305176	-0.0305176	-0.0610352	0	0	0	0	0	0.0305176	0	0
179.7	213.684	171.448	130.798	87.8906	45.6543	6.16455	-33.2642	-74.2187	-113.159	-147.949	-174.683	-0.0305176	0	-0.0305176	0	0	0	0.0610352	0	0	-0.0305176	0.0305176
179.8	205.505	164.917	125.671	84.5337	43.8843	6.16455	-31.5552	-70.8618	-107.971	-141.418	-166.687	0.0305176	-0.0305176	0	-0.0305176	0	-30.5176	-0.0305176	-0.0610352	0	-0.0610352	-0.0610352
179.9	197.693	158.691	120.728	81.3599	42.2363	6.10352	-29.9072	-67.6269	-103.149	-135.193	-159.241	0	0	0.0305176	-0.0305176	-0.0305176	-30.5176	0	-0.0305176	-0.0305176	0	-0.0305176
180	190.125	152.649	116.028	78.3081	40.6494	6.10352	-28.2593	-64.4531	-98.6328	-129.272	-152.1	0.0305176	-0.0305176	-0.0305176	0.0305176	0	-61.0352	-0.0305176	-0.0915527	0.0305176	0.0610352	-0.0305176
180.1	182.922	146.79	111.572	75.3784	39.2456	6.10352	-26.7944	-61.4014	-94.2993	-123.657	-145.264	-0.0305176	-0.0305176	-0.0305176	-0.0305176	-0.0305176	-30.5176	0	0	0	-0.0305176	0
180.2	175.903	141.174	107.3	72.5098	37.9028	6.04248	-25.3906	-58.4717	-90.0879	-118.225	-138.733	0	-0.0305176	-0.0305176	0.0305176	-0.0305176	-30.5176	0	-0.0305176	0	0	0
180.3	169.128	135.803	103.271	69.7632	36.5601	5.98144	-24.1089	-55.7251	-86.1206	-113.037	-132.568	0	-0.0305176	0	0	0	0	0	0	0.0305176	-0.0610352	0.0610352
180.4	162.659	130.737	99.4263	67.0776	35.2173	5.98144	-22.8271	-53.1616	-82.3364	-108.093	-126.648	0	-0.0610352	-0.0305176	0	0	-30.5176	0.0305176	0	-0.0305176	-0.0305176	0
180.5	156.433	125.854	95.6421	64.5142	33.9355	6.04248	-21.5454	-50.7202	-78.7353	-103.394	-121.033	0	-0.0610352	0	0	-0.0305176	0	0	-0.0305176	-0.0305176	-0.0305176	0
180.6	150.452	121.155	92.041	62.0728	32.6538	6.04248	-20.3247	-48.4619	-75.2563	-98.938	-115.601	-0.0610352	-0.0610352	-0.0915527	-0.0305176	-0.0305176	0	-0.0305176	0	-0.0305176	0.0305176	-0.0305176
180.7	144.775	116.577	88.501	59.6924	31.4331	6.04248	-19.104	-46.2646	-71.8994	-94.6655	-110.474	0	0	-0.0305176	-0.0305176	-0.0305176	-30.5176	0	-0.0305176	-0.0305176	0.0610352	0
180.8	139.404	112.183	85.2051	57.4341	30.3345	6.04248	-17.9443	-44.1284	-68.6035	-90.4541	-105.53	0	-0.0305176	0	-0.0610352	0	0	-0.0610352	0	-0.0610352	0.0305176	-0.0305176
180.9	134.277	107.91	82.0312	55.3589	29.2969	6.04248	-16.7847	-42.0532	-65.4297	-86.3647	-100.891	0	0	-0.0305176	-0.0305176	-0.0610352	-30.5176	0.0305176	-0.0305176	0	0.0305176	0
181	129.395	103.76	79.0405	53.3447	28.2593	6.10352	-15.686	-40.1001	-62.3779	-82.5195	-96.3745	0.0305176	0	0	-0.0610352	0	0	-0.0305176	-0.0305176	-0.0305176	0	0
181.1	124.634	99.9145	76.1108	51.4526	27.2827	6.16455	-14.7095	-38.208	-59.4482	-78.7964	-91.98	0	-0.0305176	-0.0305176	-0.0305176	-0.0610352	0	0	-0.0305176	-0.0305176	-0.0305176	0
181.2	119.995	96.1914	73.3032	49.6216	26.3062	6.16455	-13.7329	-36.3159	-56.6406	-75.2563	-87.7685	0	-0.0305176	-0.0610352	0	-0.0305176	30.5176	0	-0.0305176	0	0	0.0610352
181.3	115.601	92.5903	70.6787	47.8516	25.4517	6.16455	-12.8784	-34.4849	-54.0161	-71.8384	-83.8013	0	0	-0.0305176	-0.0305176	0	0	0.0305176	-0.0305176	0	0	0
181.4	111.389	89.1724	68.0542	46.1426	24.5361	6.10352	-12.0239	-32.6538	-51.4526	-68.5425	-80.0171	0	-0.0610352	0	-0.0610352	0	-30.5176	-0.0610352	-0.0305176	-0.0610352	0	0
181.5	107.3	85.9985	65.6128	44.4946	23.7427	6.10352	-11.2915	-30.8838	-49.0723	-65.3686	-76.355	-0.0305176	-0.0610352	0.0305176	0	0	30.5176	0	-0.0305176	-0.0305176	0	-0.0610352
181.6	103.394	82.8857	63.2324	42.8467	22.8271	6.10352	-10.6201	-29.1748	-46.814	-62.3169	-72.937	0	-0.0610352	0.0305176	-0.0305176	-0.0610352	0	0	-0.0610352	0	0	-0.0305176
181.7	99.6094	79.895	60.9131	41.1987	21.9727	6.04248	-9.88769	-27.6489	-44.7388	-59.3872	-69.5801	0.0305176	-0.0610352	0.0305176	-0.0610352	-0.0305176	0	0.0305176	-0.0915527	-0.0305176	0	-0.0610352
181.8	96.0083	77.0264	58.7158	39.6728	21.2402	6.10352	-9.09424	-26.1841	-42.7246	-56.6406	-66.2842	0	-0.0305176	-0.0305176	-0.0305176	0	-91.5527	-0.0305176	-0.0610352	-0.0305176	0	0.0305176
181.9	92.4683	74.1577	56.5796	38.208	20.5078	6.10352	-8.36182	-24.7803	-40.8325	-54.0161	-63.1714	0	-0.0305176	0	-0.0305176	0	-30.5176	-0.0305176	0.0305176	-0.0305176	-0.0610352	-0.0305176
182	88.9893	71.5332	54.5044	36.8652	19.8975	6.16455	-7.56836	-23.4985	-39.0015	-51.5137	-60.1807	0.0305176	-0.0305176	0.0305176	-0.0305176	0.0305176	-61.0352	0.0305176	0.0305176	0.0305176	-0.0610352	0
182.1	85.6323	68.9087	52.4902	35.5225	19.2261	6.16455	-6.83594	-22.1558	-37.1094	-49.1333	-57.312	0.0305176	-0.0915527	0.0610352	-0.0305176	-0.0610352	-30.5176	-0.0610352	-0.0305176	0	0.0305176	-0.0305176
182.2	82.3975	66.4062	50.5981	34.3018	18.6157	6.22559	-6.10352	-20.874	-35.2173	-46.875	-54.6265	-0.0610352	-0.0305176	0	-0.0305176	-0.0610352	-30.5176	-0.0305176	-0.0305176	0.0305176	0.0305176	-0.0305176
182.3	79.2847	63.9648	48.7671	33.1421	18.0664	6.22559	-5.49316	-19.6533	-33.4473	-44.7388	-52.063	-0.0305176	-0.0610352	0	-0.0305176	-0.0610352	-61.0352	-0.0610352	-0.0305176	-0.0305176	0.0305176	-0.0305176
182.4	76.2329	61.6455	47.0581	31.9824	17.5171	6.16455	-4.94385	-18.4937	-31.7993	-42.6025	-49.6216	-0.0305176	-0.0610352	0.0305176	-0.0915527	-0.0305176	-122.07	-0.0610352	-0.0305176	-0.0610352	-0.0305176	-0.0610352
182.5	73.3643	59.4482	45.4712	30.8838	16.9678	6.16455	-4.45557	-17.395	-30.2734	-40.6494	-47.3022	0	-0.0610352	0.0305176	-0.0610352	0	-91.5527	0	0	0	0.0305176	0
182.6	70.6177	57.312	43.8232	29.7241	16.3574	6.10352	-3.96728	-16.3574	-28.6865	-38.6963	-45.105	-0.0305176	-0.0915527	0	-0.0610352	-0.0610352	-30.5176	0.0305176	-0.0305176	0.0305176	-0.0305176	0.0610352
182.7	68.0542	55.2368	42.2363	28.6255	15.8081	6.10352	-3.479	-15.3198	-27.2217	-36.7432	-43.0298	-0.0610352	-0.0305176	0.0305176	-0.0305176	-0.0915527	0	0.0305176	0	0	-0.0305176	0
182.8	65.6128	53.2837	40.6494	27.5879	15.2588	6.10352	-2.99072	-14.4043	-25.6958	-34.9731	-41.0156	0	-0.0305176	0	0	0	0	0	-0.0610352	0.0305176	-0.0305176	0
182.9	63.1714	51.4526	39.1235	26.5503	14.7705	6.04248	-2.50244	-13.4888	-24.292	-33.2642	-39.0625	0.0610352	-0.0305176	0	-0.0610352	0	-30.5176	-0.0610352	-0.0305176	-0.0305176	-0.0305176	0
183	60.852	49.6216	37.7197	25.5737	14.2822	5.98144	-2.01416	-12.6953	-22.8882	-31.7383	-37.1704	0	-0.0610352	0	-0.0305176	0.0610352	-91.5527	0.0305176	0.0305176	-0.0305176	0.0305176	0
183.1	58.5937	47.7905	36.3159	24.6582	13.7939	5.98144	-1.58691	-11.8408	-21.6675	-30.1514	-35.2783	0	-0.12207	0	-0.0305176	-0.0305176	-30.5176	-0.0305176	0	-0.0305176	0	-0.0305176
183.2	56.3965	46.0815	35.0342	23.8037	13.3667	5.98144	-1.15967	-11.0474	-20.5078	-28.6865	-33.3862	0	-0.0915527	0.0305176	-0.0305176	-0.0610352	0	-0.0305176	0.0610352	-0.0305176	0.0305176	0
183.3	54.3213	44.4336	33.8135	23.0103	12.8784	6.04248	-0.793457	-10.3149	-19.4092	-27.1606	-31.6162	-0.0305176	-0.0305176	0	-0.0610352	-0.0915527	-30.5176	-0.0610352	-0.0305176	0	0.0610352	0.0305176
183.4	52.3682	42.9077	32.7148	22.1558	12.5122	6.10352	-0.488281	-9.58252	-18.3716	-25.7568	-29.9072	-0.0610352	0	-0.0305176	-0.0610352	-0.0610352	-91.5527	-0.0610352	-0.0305176	-0.0610352	0	-0.0305176
183.5	50.4761	41.4429	31.6772	21.3623	12.146	6.16455	-0.12207	-8.8501	-17.334	-24.353	-28.3813	0.0305176	-0.0610352	0.0305176	-0.0915527	0	-61.0352	-0.0610352	-0.0305176	0	-0.0305176	-0.0610352
183.6	48.7061	40.1001	30.7007	20.5688	11.7187	6.16455	0.244141	-8.05664	-16.2964	-23.0103	-26.9165	0.0610352	-0.0610352	-0.0305176	-0.0305176	-0.0305176	-61.0352	-0.0305176	0	-0.0305176	-0.0610352	0
183.7	46.9971	38.7573	29.6631	19.7754	11.4136	6.16455	0.610352	-7.26318	-15.3809	-21.7285	-25.5127	0	-0.0305176	-0.0305176	0	-0.0305176	0	0.0305176	0	0	0	0.0610352
183.8	45.3491	37.3535	28.6255	19.104	10.9863	6.16455	0.915527	-6.5918	-14.5264	-20.5078	-24.231	-0.0305176	-0.0305176	0	-0.0305176	-0.152588	0	0	0	0.0305176	0.0305176	0.0305176
183.9	43.7622	36.0718	27.5879	18.4326	10.6812	6.04248	1.2207	-5.98144	-13.6719	-19.4092	-22.9492	0.0305176	0.0305176	0.0305176	-0.0610352	-0.0610352	61.0352	0	-0.0610352	0.0915527	-0.0305176	0
184	42.2363	34.79	26.5503	17.8833	10.376	5.98144	1.52588	-5.43213	-12.7563	-18.3105	-21.6675	0	-0.0305176	0	-0.0915527	-0.0610352	-61.0352	-0.0610352	-0.0915527	-0.0305176	0	-0.0610352
184.1	40.7715	33.5693	25.5127	17.334	10.1318	5.98144	1.77002	-4.94385	-11.9019	-17.2729	-20.3857	-0.0305176	0.0305176	0.0305176	0	0	-122.07	0	-0.0610352	-0.0610352	0.0305176	-0.0610352
184.2	39.3677	32.3486	24.5972	16.7847	9.82666	5.98144	2.01416	-4.39453	-11.1084	-16.2964	-19.2261	0	-0.0305176	0.0305176	-0.0610352	-0.0305176	-61.0352	-0.0305176	-0.0305176	-0.0305176	0.0305176	0.0305176
184.3	38.0249	31.189	23.7427	16.2354	9.52148	5.98144	2.19727	-3.84521	-10.2539	-15.3809	-18.1274	0.0305176	-0.0305176	-0.0305176	-0.0610352	-0.0610352	-61.0352	0.0305176	0	0	0.0305176	0.0610352
184.4	36.6821	30.0903	22.9492	15.7471	9.21631	5.92041	2.44141	-3.23486	-9.46045	-14.5264	-17.0288	0	0.0305176	0.0305176	-0.0305176	-0.0915527	30.5176	-0.0305176	-0.0305176	0.0305176	0	0.0305176
184.5	35.4004	28.9917	22.2168	15.2588	8.91113	5.92041	2.68555	-2.74658	-8.66699	-13.6719	-15.9912	0	0.0305176	-0.0610352	-0.0305176	-0.0610352	-30.5176	-0.0610352	-0.0305176	0	0	-0.0610352
184.6	34.2407	27.9541	21.4844	14.7095	8.66699	5.92041	2.99072	-2.31934	-7.9956	-12.8784	-15.0146	0	-0.0305176	-0.0610352	-0.0305176	0	0	-0.0610352	-0.0610352	-0.0305176	-0.0610352	-0.0610352
184.7	33.0811	27.0386	20.813	14.2212	8.42285	5.92041	3.23486	-1.83105	-7.38525	-12.0239	-14.0381	0.0305176	-0.0305176	0	-0.0610352	0.0305176	-61.0352	0	0.0305176	-0.0305176	-0.0305176	-0.0305176
184.8	31.9824	26.123	20.2026	13.7329	8.17871	5.98144	3.479	-1.46484	-6.71387	-11.1694	-13.0615	-0.0610352	-0.0305176	0.0305176	-0.0610352	0	-30.5176	-0.0305176	-0.0610352	-0.0305176	0	0.0305176
184.9	30.8838	25.3296	19.5923	13.3057	7.93457	5.98144	3.72314	-1.0376	-6.16455	-10.3149	-12.146	0	0.0305176	0	0	-0.0610352	-30.5176	0.0305176	-0.0610352	-0.0305176	0.0305176	0.0610352
185	29.8462	24.5972	18.9819	12.8784	7.69043	5.92041	3.90625	-0.610352	-5.5542	-9.58252	-11.3525	-0.0610352	-0.0305176	-0.0305176	-0.0915527	-0.0915527	30.5176	-0.0305176	-0.0915527	0	0.0305176	0.0610352
185.1	28.7476	23.8037	18.3105	12.5122	7.50732	5.85937	4.15039	-0.244141	-5.06592	-8.8501	-10.6812	0.0305176	0.0610352	0	-0.0915527	-0.0305176	-30.5176	-0.0305176	-0.0610352	0	0.0305176	-0.0305176
185.2	27.771	23.0713	17.6392	12.146	7.26318	5.85937	4.39453	0.0610352	-4.57764	-8.23975	-9.94873	0	0	0.0305176	0	-0.0305176	-30.5176	0	0.0610352	-0.0305176	-0.0610352	-0.0610352
185.3	26.8555	22.3389	17.0288	11.7187	7.01904	5.85937	4.63867	0.427246	-4.08936	-7.56836	-9.27734	0	-0.0305176	-0.0610352	0	0.0305176	-61.0352	0	0	0	-0.0610352	-0.0305176
185.4	26.001	21.5454	16.3574	11.3525	6.83594	5.85937	4.94385	0.793457	-3.66211	-7.01904	-8.54492	0.0915527	0	-0.0610352	0	0	-30.5176	0.0610352	-0.0305176	0.0305176	-0.0305176	-0.0305176
185.5	25.1465	20.813	15.8081	10.9863	6.7749	5.92041	5.12695	1.15967	-3.11279	-6.40869	-7.87353	0	-0.0305176	0	0	0	0	0	0	0	0.0305176	0.0305176
185.6	24.353	20.0195	15.2588	10.6812	6.65283	5.98144	5.31006	1.52588	-2.56348	-5.85937	-7.26318	-0.0305176	-0.0610352	-0.0305176	0	0	0	-0.0305176	0	-0.0305176	0.0305176	0
185.7	23.5596	19.4092	14.7095	10.376	6.53076	6.04248	5.49316	1.77002	-2.0752	-5.31006	-6.65283	0	0.0305176	0	-0.0610352	-0.0610352	30.5176	0	-0.0610352	-0.0305176	0.0305176	-0.0305176
185.8	22.7661	18.7988	14.2822	10.0708	6.40869	6.10352	5.61523	2.01416	-1.58691	-4.82178	-6.16455	0.0305176	-0.0305176	-0.0610352	-0.0610352	-0.0610352	0	-0.0305176	-0.0610352	-0.0305176	-0.0610352	-0.0610352
185.9	22.0337	18.3105	13.855	9.70459	6.28662	6.04248	5.7373	2.2583	-1.15967	-4.3335	-5.67627	-0.0305176	-0.0305176	-0.0610352	-0.0610352	-0.0305176	-30.5176	-0.0305176	-0.0305176	-0.0305176	-0.0305176	0
186	21.4233	17.7612	13.4277	9.39941	6.16455	5.98144	5.79834	2.56348	-0.732422	-3.90625	-5.18799	0.0305176	0	-0.0305176	-0.0305176	-0.0305176	-30.5176	0	0	0.0305176	-0.0305176	0.0305176
186.1	20.813	17.2729	13.0615	9.09424	6.04248	5.92041	5.85937	2.80762	-0.366211	-3.41797	-4.63867	0.0610352	0	-0.0305176	0	-0.0305176	-61.0352	0	0	0	0	0.0305176
186.2	20.2026	16.7236	12.6953	8.72803	5.85937	5.92041	5.98144	2.99072	0	-2.92969	-4.02832	-0.0305176	-0.0305176	-0.0610352	0	-0.0305176	91.5527	0	-0.0305176	-0.0305176	0	0
186.3	19.4702	16.1133	12.3901	8.42285	5.7373	5.92041	6.10352	3.17383	0.244141	-2.50244	-3.41797	-0.0305176	-0.0305176	0	-0.0305176	0	0	0.0305176	0.0305176	-0.0305176	0.0610352	0.0305176
186.4	18.7988	15.4419	11.9629	8.17871	5.67627	5.92041	6.28662	3.35693	0.488281	-2.0752	-2.92969	0	-0.0610352	0	-0.0610352	0	0	-0.0305176	0	-0.0305176	-0.0305176	-0.0305176
186.5	18.2495	14.8926	11.5356	7.9956	5.61523	5.92041	6.40869	3.54004	0.671387	-1.70898	-2.50244	-0.0305176	-0.0610352	0	-0.0305176	0	0	-0.0305176	0	-0.0610352	-0.0305176	0.0305176
186.6	17.6392	14.4043	11.1084	7.8125	5.61523	5.98144	6.53076	3.78418	0.915527	-1.40381	-2.0752	-0.0305176	-0.0305176	0	-0.0305176	0.0305176	-61.0352	0	-0.0305176	-0.0305176	-0.0610352	-0.0305176
186.7	17.1509	13.977	10.7422	7.62939	5.37109	6.04248	6.7749	4.02832	1.15967	-1.0376	-1.64795	-0.0305176	-0.0305176	0	-0.0305176	0	-30.5176	0	-0.0305176	0.0610352	0.0305176	-0.0305176
186.8	16.6016	13.5498	10.376	7.50732	5.18799	6.04248	6.89697	4.27246	1.40381	-0.732422	-1.28174	-0.0305176	-0.0305176	0	0	-0.0610352	0	-0.0305176	0.0305176	-0.0305176	0	0.0305176
186.9	15.9912	13.0615	10.0098	7.26318	5.00488	5.92041	7.01904	4.57764	1.70898	-0.366211	-0.793457	0	0	-0.0305176	-0.0305176	-0.0305176	-30.5176	0	0.0305176	0	0	0.0305176
187	15.4419	12.5732	9.70459	7.01904	4.88281	5.85937	6.95801	4.76074	2.0752	0	-0.427246	-0.0305176	-0.0610352	-0.0610352	0	-0.0305176	0	0.0305176	0	0	-0.0610352	-0.0305176
187.1	14.9536	12.207	9.39941	6.83594	4.82178	5.79834	6.95801	4.88281	2.38037	0.366211	-0.0610352	0	-0.0610352	0	-0.0610352	-0.0305176	-30.5176	-0.0305176	0	-0.0305176	-0.0305176	0.0305176
187.2	14.4653	11.9019	9.09424	6.65283	4.76074	5.7373	7.01904	5.00488	2.56348	0.732422	0.244141	0	-0.0305176	0	-0.0305176	0.0610352	-30.5176	-0.0305176	-0.0305176	0	-0.0305176	-0.0305176
187.3	14.0381	11.6577	8.78906	6.40869	4.63867	5.7373	7.08008	5.18799	2.74658	0.976562	0.610352	-0.0610352	-0.0305176	-0.0305176	-0.0305176	0	-30.5176	-0.0610352	-0.0305176	0	0	-0.0305176
187.4	13.5498	11.3525	8.48389	6.22559	4.5166	5.7373	7.14111	5.37109	2.99072	1.15967	0.854492	-0.0610352	0	-0.0305176	-0.0305176	-0.0305176	0	-0.0305176	-0.0305176	-0.0610352	0.0305176	-0.0305176
187.5	13.1226	11.0474	8.23975	6.04248	4.39453	5.67627	7.14111	5.5542	3.23486	1.34277	1.09863	-0.0305176	0.0305176	-0.0305176	-0.0305176	-0.0305176	-61.0352	-0.0915527	-0.0610352	-0.0305176	0.0305176	-0.0305176
187.6	12.7563	10.7422	7.9956	5.85937	4.3335	5.5542	7.26318	5.7373	3.35693	1.64795	1.34277	0	0.0305176	-0.0610352	-0.0305176	-0.0610352	0	0	0	-0.0305176	-0.0305176	0
187.7	12.4512	10.376	7.75146	5.7373	4.27246	5.5542	7.32422	5.85937	3.54004	1.95312	1.58691	0	0	-0.0915527	0	0	-61.0352	0	0.0305176	0.0305176	-0.0305176	0.0305176
187.8	12.207	10.0098	7.56836	5.5542	4.27246	5.61523	7.44629	5.85937	3.72314	2.19727	1.89209	0	-0.0305176	-0.0305176	0	0	-30.5176	0	-0.0610352	0	-0.0610352	-0.0610352
187.9	11.9019	9.64355	7.38525	5.37109	4.15039	5.67627	7.56836	5.92041	3.90625	2.38037	2.13623	-0.0305176	0.0305176	0.0610352	0	0	30.5176	-0.0305176	-0.0305176	0.0305176	0	0
188	11.5967	9.33838	7.26318	5.12695	4.02832	5.79834	7.69043	5.98144	4.08936	2.50244	2.38037	-0.0610352	-0.0305176	0	0	-0.0305176	-30.5176	-0.0610352	-0.0305176	0	0.0305176	-0.0610352
188.1	11.2915	9.15527	7.08008	4.94385	3.96728	5.85937	7.75146	6.04248	4.27246	2.74658	2.56348	0	0	-0.0305176	-0.0305176	0	30.5176	-0.0305176	-0.0305176	-0.0610352	0	-0.0305176
188.2	10.9863	8.91113	6.95801	4.88281	3.96728	5.92041	7.75146	6.16455	4.5166	2.99072	2.74658	-0.0610352	0	0	0	0	0	-0.0305176	-0.0305176	0	0.0610352	0.0305176
188.3	10.6812	8.66699	6.7749	4.76074	3.96728	5.98144	7.75146	6.22559	4.69971	3.17383	2.92969	-0.0305176	0	0	0.0305176	-0.0305176	0	0.0305176	0	-0.0305176	-0.0305176	0
188.4	10.376	8.42285	6.5918	4.69971	3.96728	5.98144	7.75146	6.34766	4.88281	3.41797	3.17383	0.0305176	0	0	0	-0.0610352	0	-0.0305176	-0.0305176	0.0305176	0	0
188.5	10.0098	8.17871	6.40869	4.57764	3.90625	5.98144	7.75146	6.40869	5.00488	3.54004	3.41797	-0.0305176	0.0305176	-0.0305176	0	-0.0305176	-61.0352	0.0305176	-0.0305176	0	-0.0305176	-0.0305176
188.6	9.64355	7.93457	6.16455	4.39453	3.90625	5.98144	7.87353	6.53076	5.06592	3.72314	3.60107	0	-0.0305176	-0.0305176	0.0305176	-0.0305176	0	-0.0305176	0	0.0305176	-0.0305176	-0.0305176
188.7	9.33838	7.69043	6.04248	4.21143	3.78418	5.92041	7.93457	6.65283	5.18799	3.90625	3.78418	0	0	-0.0305176	-0.0305176	-0.0305176	0	0	0	0	-0.0305176	-0.0305176
188.8	9.09424	7.44629	5.85937	4.02832	3.72314	5.85937	7.9956	6.7749	5.31006	4.02832	3.96728	0	-0.0305176	-0.0305176	0	-0.0610352	0	-0.0305176	-0.0610352	-0.0305176	0	0
188.9	8.91113	7.26318	5.7373	3.96728	3.66211	5.79834	8.05664	6.83594	5.49316	4.21143	4.15039	-0.0305176	0	-0.0305176	-0.0305176	-0.0305176	-61.0352	-0.0305176	-0.0305176	-0.0305176	-0.0305176	0
189	8.78906	7.14111	5.5542	3.90625	3.54004	5.79834	8.11768	6.89697	5.61523	4.3335	4.3335	-0.0610352	0.0305176	-0.0610352	-0.0305176	0	-30.5176	-0.0610352	-0.0305176	0	0	-0.0305176
189.1	8.60596	7.01904	5.37109	3.90625	3.41797	5.7373	8.17871	6.95801	5.79834	4.57764	4.5166	-0.0305176	0	-0.0305176	-0.0305176	-0.0305176	-30.5176	-0.0305176	-0.0305176	0	0	-0.0305176
189.2	8.42285	6.83594	5.24902	3.84521	3.35693	5.67627	8.30078	7.01904	5.92041	4.76074	4.69971	-0.0610352	0.0915527	0	0.0610352	-0.0610352	0	-0.0610352	0	-0.0305176	-0.0305176	0.0305176
189.3	8.23975	6.65283	5.12695	3.84521	3.2959	5.61523	8.36182	7.14111	6.04248	4.94385	4.88281	-0.0610352	-0.0305176	0	-0.0305176	-0.0305176	30.5176	0.0305176	-0.0305176	0	0	0.0305176
189.4	7.9956	6.46973	5.06592	3.78418	3.2959	5.67627	8.36182	7.26318	6.10352	5.00488	5.00488	0	-0.0305176	-0.0610352	-0.0305176	-0.0305176	30.5176	-0.0305176	0	-0.0610352	-0.0305176	0
189.5	7.87353	6.28662	4.94385	3.72314	3.2959	5.67627	8.42285	7.32422	6.22559	5.06592	5.12695	0	-0.0305176	-0.0305176	0.0305176	0.0305176	0	-0.0305176	0	-0.0305176	-0.0305176	0
189.6	7.62939	6.10352	4.76074	3.66211	3.35693	5.67627	8.42285	7.32422	6.40869	5.12695	5.24902	-0.0305176	-0.0305176	0	0	-0.0305176	-30.5176	0	0	-0.0305176	-0.0915527	0
189.7	7.44629	5.92041	4.63867	3.54004	3.35693	5.7373	8.42285	7.38525	6.53076	5.24902	5.37109	-0.0610352	0	-0.0305176	0.0305176	0	0	0	0	-0.0610352	0	-0.0305176
189.8	7.26318	5.79834	4.45557	3.35693	3.35693	5.79834	8.42285	7.38525	6.5918	5.37109	5.5542	-0.0915527	0	-0.0610352	-0.0305176	-0.0305176	61.0352	-0.0610352	-0.0610352	-0.0305176	0	0
189.9	7.01904	5.67627	4.39453	3.23486	3.2959	5.92041	8.42285	7.44629	6.65283	5.5542	5.7373	-0.0305176	0.0305176	-0.0610352	-0.0305176	-0.0305176	-30.5176	-0.0305176	0	0.0305176	0.0305176	-0.0305176
190	6.83594	5.5542	4.3335	3.11279	3.23486	5.92041	8.42285	7.50732	6.71387	5.7373	5.79834	-0.0305176	0	-0.0305176	0.0610352	0.0305176	-30.5176	0	-0.0305176	0	-0.0610352	-0.0305176
190.1	6.65283	5.49316	4.3335	2.99072	3.17383	5.92041	8.48389	7.56836	6.7749	5.85937	5.85937	-0.0610352	0	-0.0610352	0	0.0610352	-61.0352	-0.0305176	0.0305176	0	-0.12207	0
190.2	6.40869	5.37109	4.27246	2.99072	3.05176	5.85937	8.54492	7.62939	6.83594	5.92041	5.98144	0	0	-0.0610352	0.0305176	0.0305176	0	0.0305176	0.0305176	0.0610352	-0.0610352	0.0610352
190.3	6.22559	5.24902	4.15039	2.99072	3.05176	5.79834	8.54492	7.69043	6.89697	6.04248	6.10352	-0.0305176	0.0305176	0.0305176	0	-0.0305176	61.0352	-0.0305176	0	-0.0305176	-0.0915527	0
190.4	6.10352	5.06592	3.96728	2.99072	2.99072	5.7373	8.54492	7.75146	6.89697	6.04248	6.16455	-0.0305176	0	0	0.0305176	0	30.5176	0	0	-0.0305176	-0.0305176	-0.0305176
190.5	5.92041	4.94385	3.84521	2.99072	3.11279	5.61523	8.54492	7.75146	6.95801	6.10352	6.28662	-0.0305176	-0.0305176	-0.0305176	-0.0610352	0.0305176	30.5176	-0.0610352	0	-0.0305176	-0.0610352	0
190.6	5.79834	4.82178	3.72314	2.92969	3.11279	5.61523	8.60596	7.75146	7.01904	6.16455	6.40869	-0.0915527	-0.0305176	-0.0305176	-0.0305176	0	0	0	0	-0.0305176	-0.0305176	-0.0305176
190.7	5.67627	4.69971	3.66211	2.92969	3.17383	5.61523	8.72803	7.8125	7.08008	6.22559	6.46973	0	-0.0305176	-0.0305176	0	0.0305176	-30.5176	0.0305176	0.0305176	-0.0305176	-0.0610352	0
190.8	5.5542	4.63867	3.60107	2.86865	3.17383	5.61523	8.78906	7.87353	7.14111	6.28662	6.46973	-0.0305176	-0.0305176	0	0.0305176	0.0305176	-30.5176	0	0	-0.0305176	-0.0305176	0.0305176
190.9	5.49316	4.57764	3.479	2.80762	3.11279	5.61523	8.78906	7.93457	7.14111	6.28662	6.46973	-0.0305176	0.0305176	-0.0610352	0	-0.0305176	0	0.0305176	0	0	-0.0305176	-0.0305176
191	5.49316	4.57764	3.479	2.74658	3.11279	5.67627	8.78906	7.93457	7.20215	6.34766	6.53076	0.0305176	0.0305176	-0.0610352	-0.0305176	-0.0305176	0	0	0.0305176	0.0305176	-0.0305176	-0.0305176
191.1	5.43213	4.57764	3.41797	2.68555	3.05176	5.67627	8.78906	7.93457	7.26318	6.40869	6.53076	0	0.0305176	-0.0305176	0	0.0610352	0	-0.0305176	0.0610352	0	-0.0305176	-0.0610352
191.2	5.31006	4.57764	3.54004	2.68555	3.05176	5.67627	8.78906	7.9956	7.32422	6.53076	6.65283	0.0305176	0	-0.0305176	0	0.0305176	-30.5176	0	0.0610352	-0.0305176	-0.0610352	-0.0305176
191.3	5.24902	4.45557	3.54004	2.62451	2.99072	5.61523	8.8501	8.05664	7.38525	6.5918	6.7749	0	-0.0305176	0.0305176	0	0	0	-0.0305176	0.0305176	-0.0305176	-0.0610352	0.0610352
191.4	5.12695	4.3335	3.479	2.56348	2.99072	5.61523	8.78906	8.05664	7.38525	6.71387	6.89697	0	0.0305176	0.0305176	0	0	30.5176	-0.0305176	-0.0305176	0	0	0
191.5	5.06592	4.21143	3.41797	2.50244	2.92969	5.61523	8.66699	8.11768	7.44629	6.7749	6.95801	-0.0610352	0.0305176	-0.0305176	-0.0305176	-0.0610352	30.5176	-0.0305176	-0.0610352	-0.0305176	0.0305176	0.0305176
191.6	4.88281	4.08936	3.2959	2.50244	2.92969	5.61523	8.66699	8.05664	7.44629	6.83594	7.01904	0	0	-0.0610352	0	-0.0305176	-30.5176	-0.0610352	0	-0.0305176	-0.0305176	-0.0305176
191.7	4.76074	3.96728	3.2959	2.44141	2.92969	5.61523	8.66699	8.11768	7.44629	6.89697	7.08008	-0.0305176	0.0305176	-0.0305176	0	0.0610352	-30.5176	-0.0305176	-0.0305176	-0.0305176	-0.0610352	-0.0305176
191.8	4.69971	3.90625	3.17383	2.44141	2.86865	5.67627	8.72803	8.17871	7.44629	6.89697	7.14111	-0.0305176	0	0	0	0.0610352	-30.5176	0.0305176	0.0305176	0	-0.0610352	0
191.9	4.69971	3.90625	3.11279	2.50244	2.80762	5.7373	8.72803	8.30078	7.44629	6.95801	7.20215	0	0	0	0	0.0305176	30.5176	0.0610352	0.0610352	0	0	-0.0305176
192	4.69971	3.90625	3.05176	2.44141	2.68555	5.7373	8.78906	8.36182	7.44629	6.95801	7.26318	-0.0610352	-0.0305176	-0.0305176	0	0.0305176	61.0352	0	-0.0305176	0	-0.0305176	-0.0305176
192.1	4.69971	3.84521	2.99072	2.44141	2.62451	5.79834	8.8501	8.42285	7.50732	7.01904	7.32422	-0.0305176	0.0305176	-0.0305176	0	-0.0305176	61.0352	-0.0305176	-0.0305176	-0.0610352	-0.0305176	-0.0305176
192.2	4.63867	3.78418	2.92969	2.31934	2.62451	5.7373	8.91113	8.42285	7.56836	7.08008	7.38525	-0.0915527	-0.0305176	-0.0305176	-0.0610352	0.0305176	0	-0.0915527	-0.0305176	-0.0610352	-0.0305176	0
192.3	4.45557	3.72314	2.86865	2.31934	2.62451	5.67627	8.91113	8.48389	7.62939	7.08008	7.44629	-0.0305176	0	-0.0305176	0	0.0305176	-91.5527	-0.0610352	0.0305176	-0.0305176	0	-0.0305176
192.4	4.3335	3.66211	2.86865	2.38037	2.62451	5.61523	8.97217	8.42285	7.69043	7.01904	7.50732	-0.0610352	0.0305176	0	0.0305176	0.0305176	0	0	0.0305176	0	-0.0305176	0
192.5	4.21143	3.66211	2.80762	2.44141	2.62451	5.61523	9.0332	8.42285	7.75146	7.01904	7.44629	-0.0610352	0.0305176	0	0	0	0	0	0	0.12207	0	0.0305176
192.6	4.15039	3.60107	2.74658	2.44141	2.62451	5.61523	9.0332	8.36182	7.75146	6.95801	7.38525	-0.0305176	0.0305176	0	0	0.0305176	30.5176	0	0	0.0305176	0	0.0610352
192.7	4.08936	3.54004	2.68555	2.38037	2.68555	5.67627	9.0332	8.36182	7.75146	7.01904	7.44629	0	0.0915527	-0.0610352	0.0305176	0	30.5176	-0.0305176	-0.0305176	0	-0.0305176	-0.0610352
192.8	4.08936	3.479	2.62451	2.44141	2.68555	5.67627	9.0332	8.36182	7.75146	7.14111	7.50732	-0.0305176	0	-0.0305176	0	0.0915527	0	-0.0305176	0	-0.0305176	-0.0305176	-0.0305176
192.9	4.15039	3.41797	2.62451	2.50244	2.68555	5.7373	9.09424	8.36182	7.87353	7.20215	7.62939	-0.0305176	-0.0610352	-0.0305176	0	0.0305176	-30.5176	0	-0.0305176	-0.0305176	-0.0610352	-0.0915527
193	4.15039	3.479	2.62451	2.50244	2.74658	5.7373	9.09424	8.42285	7.93457	7.26318	7.69043	-0.0305176	0	0	0	0	30.5176	0	0	0	0.0305176	0.0305176
193.1	4.08936	3.479	2.62451	2.50244	2.68555	5.7373	9.09424	8.48389	7.9956	7.26318	7.8125	-0.0610352	-0.0305176	0.0305176	0.0305176	-0.0305176	30.5176	-0.0305176	-0.0610352	0	0.0610352	0.0610352
193.2	4.02832	3.41797	2.62451	2.44141	2.68555	5.67627	9.0332	8.54492	8.11768	7.32422	7.8125	-0.0610352	0	-0.0610352	-0.0305176	-0.0305176	30.5176	-0.0610352	-0.0610352	0.0305176	0.0305176	0.0305176
193.3	3.96728	3.479	2.62451	2.44141	2.62451	5.67627	9.0332	8.60596	8.17871	7.38525	7.8125	-0.0305176	0	-0.0610352	0	0	-61.0352	-0.0305176	0.0305176	-0.0305176	0	-0.0305176
193.4	3.96728	3.41797	2.56348	2.38037	2.62451	5.61523	9.0332	8.66699	8.23975	7.38525	7.87353	-0.0305176	0	-0.0305176	0	-0.0305176	30.5176	-0.0610352	0.0305176	-0.0305176	-0.0610352	-0.0305176
193.5	3.96728	3.479	2.56348	2.38037	2.56348	5.5542	9.0332	8.72803	8.23975	7.44629	7.8125	0	-0.0305176	-0.0305176	0.0305176	-0.0305176	0	0.0305176	0.0305176	0	-0.0305176	0
193.6	3.96728	3.479	2.56348	2.38037	2.62451	5.5542	9.0332	8.72803	8.23975	7.44629	7.8125	-0.0610352	0	-0.0305176	0	0.0305176	0	0.0305176	0.0305176	0	-0.0305176	0
193.7	3.90625	3.41797	2.50244	2.38037	2.68555	5.5542	9.0332	8.72803	8.23975	7.44629	7.8125	-0.0305176	0	-0.0305176	0.0305176	0	61.0352	0.0305176	0.0305176	0	0.0305176	-0.0305176
193.8	3.84521	3.2959	2.50244	2.31934	2.68555	5.5542	9.09424	8.72803	8.23975	7.50732	7.93457	-0.0305176	-0.0610352	-0.0610352	-0.0305176	-0.0305176	-30.5176	0	0	0	-0.0305176	-0.0305176
193.9	3.78418	3.23486	2.56348	2.2583	2.68555	5.61523	9.09424	8.66699	8.30078	7.56836	7.93457	0	-0.0610352	-0.0305176	0	0.0305176	-30.5176	-0.0610352	0	0.0305176	-0.0915527	-0.0610352
194	3.72314	3.17383	2.62451	2.19727	2.68555	5.61523	9.09424	8.66699	8.36182	7.50732	7.93457	-0.0305176	0.0305176	0	0.0305176	0	-61.0352	-0.0305176	-0.0305176	0	-0.0610352	0.0305176
194.1	3.66211	3.11279	2.62451	2.13623	2.68555	5.61523	9.0332	8.66699	8.42285	7.50732	7.9956	0	-0.0305176	0	0.0305176	-0.0305176	-30.5176	-0.0305176	0	0	-0.0915527	0.0305176
194.2	3.60107	3.05176	2.50244	2.13623	2.74658	5.67627	9.0332	8.66699	8.48389	7.50732	7.9956	0	0.0305176	0	0	0	-30.5176	0	0.0610352	0.0305176	0	0.0305176
194.3	3.54004	2.99072	2.38037	2.19727	2.74658	5.79834	8.97217	8.60596	8.54492	7.50732	8.05664	0.0305176	0	-0.0305176	0.0305176	0.0610352	30.5176	0.0305176	0.0305176	0.0610352	-0.0305176	0
194.4	3.479	2.92969	2.2583	2.2583	2.74658	5.92041	8.91113	8.60596	8.54492	7.50732	8.05664	0	0	0	0	0	30.5176	0.0305176	0	0	-0.0610352	-0.0610352
194.5	3.2959	2.92969	2.2583	2.31934	2.74658	5.98144	8.97217	8.66699	8.48389	7.56836	8.11768	0.0305176	-0.0610352	0	0	0.0610352	0	-0.0305176	0	-0.0915527	-0.0915527	-0.0305176
194.6	3.17383	2.86865	2.2583	2.31934	2.68555	5.98144	8.97217	8.72803	8.48389	7.62939	8.11768	-0.0305176	-0.0305176	0.0305176	0	0.0305176	-61.0352	-0.0610352	0	-0.0305176	-0.0305176	-0.0305176
194.7	3.23486	2.74658	2.19727	2.31934	2.68555	5.92041	9.09424	8.8501	8.48389	7.62939	8.11768	-0.0305176	-0.0305176	0	0	0.0305176	-30.5176	-0.0610352	-0.0305176	-0.0305176	-0.0610352	-0.0305176
194.8	3.2959	2.68555	2.13623	2.31934	2.68555	5.85937	9.09424	8.8501	8.48389	7.69043	8.11768	-0.0305176	0.0305176	0.0305176	0	-0.0305176	-61.0352	-0.0305176	0	-0.0305176	-0.0305176	0.0305176
194.9	3.41797	2.80762	2.19727	2.2583	2.74658	5.7373	9.0332	8.91113	8.48389	7.75146	8.11768	-0.0305176	0	0	-0.0305176	-0.0305176	0	-0.0305176	0	-0.0610352	0	0.0305176
195	3.479	2.92969	2.2583	2.2583	2.62451	5.67627	8.97217	8.91113	8.42285	7.8125	8.11768	0	0	-0.0610352	-0.0305176	-0.0610352	30.5176	0	0	0	-0.0305176	-0.0305176
195.1	3.54004	2.99072	2.31934	2.2583	2.50244	5.5542	8.91113	8.8501	8.42285	7.87353	8.11768	-0.0305176	0	-0.0305176	-0.0305176	0	0	0	0.0305176	0	-0.0610352	0
195.2	3.54004	3.05176	2.31934	2.19727	2.50244	5.43213	8.91113	8.78906	8.36182	7.87353	8.05664	0	-0.0305176	0.0305176	0	0	-30.5176	-0.0305176	0	-0.0305176	-0.0610352	-0.0305176
195.3	3.54004	3.05176	2.38037	2.13623	2.62451	5.43213	8.78906	8.72803	8.30078	7.93457	7.9956	-0.0305176	-0.0305176	0	0	0	0	0	0.0305176	0	-0.0915527	-0.0305176
195.4	3.479	3.05176	2.38037	2.0752	2.68555	5.5542	8.78906	8.66699	8.30078	7.93457	7.9956	-0.0305176	-0.0305176	0.0305176	-0.0305176	-0.0305176	0	0	0	-0.0305176	-0.0305176	-0.0610352
195.5	3.479	3.05176	2.31934	2.01416	2.80762	5.7373	8.91113	8.60596	8.23975	7.87353	8.11768	-0.0610352	-0.0305176	-0.0610352	-0.0305176	-0.0305176	-30.5176	0	0	0	0.0610352	0
195.6	3.41797	3.05176	2.19727	2.01416	2.86865	5.79834	9.0332	8.66699	8.17871	7.8125	8.23975	-0.0610352	0	-0.0305176	-0.0915527	0	30.5176	-0.0305176	0	-0.0305176	0	0
195.7	3.41797	2.99072	2.13623	2.01416	2.92969	5.79834	9.09424	8.72803	8.30078	7.69043	8.30078	0.0305176	0	0.0305176	-0.0610352	0	-30.5176	-0.0610352	0	0	-0.0305176	0
195.8	3.35693	2.92969	2.13623	2.01416	2.92969	5.7373	9.09424	8.78906	8.48389	7.62939	8.17871	-0.0610352	0	-0.0305176	-0.0915527	-0.0610352	-61.0352	0	0	-0.0610352	0	-0.0305176
195.9	3.35693	2.86865	2.19727	1.95312	2.86865	5.67627	9.0332	8.78906	8.60596	7.69043	8.11768	-0.0305176	-0.0305176	-0.0305176	-0.0305176	-0.0305176	-30.5176	-0.0305176	0.0305176	0	-0.0610352	-0.0610352
196	3.35693	2.92969	2.2583	1.95312	2.86865	5.61523	8.97217	8.8501	8.66699	7.69043	8.11768	-0.0305176	0	0	0.0610352	-0.0610352	0	-0.0305176	0	-0.0305176	0	0
196.1	3.35693	2.92969	2.2583	1.95312	2.86865	5.61523	8.97217	8.8501	8.60596	7.75146	8.17871	0	0	0	-0.0305176	0.0610352	61.0352	-0.0610352	-0.0305176	0	0.0305176	-0.0610352
196.2	3.35693	2.92969	2.2583	1.95312	2.86865	5.61523	8.97217	8.8501	8.54492	7.75146	8.17871	-0.0305176	0	0.0305176	0	0	-30.5176	-0.0305176	-0.0305176	-0.0305176	0	-0.0610352
196.3	3.35693	2.92969	2.19727	1.95312	2.92969	5.67627	8.97217	8.91113	8.54492	7.75146	8.23975	0	-0.0305176	0	-0.0610352	0	-30.5176	-0.0305176	-0.0610352	-0.0305176	0.0305176	-0.0305176
196.4	3.35693	2.92969	2.13623	1.89209	3.05176	5.7373	8.97217	8.91113	8.54492	7.8125	8.30078	-0.0305176	0.0305176	0	-0.0610352	0	-30.5176	-0.0610352	-0.0305176	0	0	0.0305176
196.5	3.35693	2.92969	2.0752	1.89209	3.11279	5.79834	8.97217	8.8501	8.54492	7.8125	8.36182	0.0305176	0	0	-0.0305176	-0.0305176	-30.5176	-0.0305176	-0.0305176	0	0	-0.0305176
196.6	3.35693	2.92969	2.01416	1.95312	3.11279	5.79834	8.97217	8.8501	8.60596	7.87353	8.42285	0	0.0305176	-0.0305176	0	0	-30.5176	-0.0305176	-0.0305176	0	0	-0.0610352
196.7	3.2959	2.86865	2.01416	1.95312	3.11279	5.79834	8.97217	8.91113	8.60596	7.9956	8.48389	0.0305176	0	-0.0305176	0	0	-30.5176	0.0305176	-0.0305176	-0.0305176	-0.0305176	0
196.8	3.2959	2.80762	2.0752	2.01416	3.11279	5.7373	8.91113	8.91113	8.60596	7.9956	8.54492	-0.0305176	-0.0610352	-0.0305176	-0.0305176	-0.0305176	-30.5176	-0.0305176	0	0	0	-0.0305176
196.9	3.35693	2.80762	2.13623	1.95312	3.11279	5.7373	8.8501	8.97217	8.66699	7.9956	8.48389	0	-0.0305176	-0.0305176	0.0305176	0	-30.5176	0	-0.0305176	-0.0305176	-0.0610352	0.0305176
197	3.35693	2.86865	2.13623	1.95312	3.05176	5.7373	8.72803	9.0332	8.72803	7.9956	8.42285	0	-0.0305176	0.0305176	0	-0.0305176	-30.5176	-0.0915527	-0.0305176	0	-0.0305176	-0.0305176
197.1	3.35693	2.86865	2.13623	1.95312	2.99072	5.7373	8.66699	9.09424	8.72803	7.93457	8.42285	0	-0.0610352	-0.0305176	-0.0305176	-0.0305176	-30.5176	0	-0.0305176	0	-0.0305176	-0.0610352
197.2	3.35693	2.80762	2.13623	1.95312	2.92969	5.79834	8.66699	9.09424	8.72803	7.87353	8.36182	0	0	0	-0.0610352	0	-30.5176	0.0305176	-0.0305176	-0.0305176	-0.0305176	-0.0305176
197.3	3.35693	2.68555	2.13623	1.95312	2.86865	5.79834	8.72803	9.09424	8.72803	7.87353	8.36182	-0.0305176	-0.0305176	-0.0305176	0	-0.0305176	-30.5176	0	-0.0305176	0	0	-0.0305176
197.4	3.35693	2.56348	2.13623	1.95312	2.86865	5.79834	8.78906	9.15527	8.60596	7.93457	8.30078	0.0305176	-0.0305176	-0.0610352	-0.0305176	-0.0305176	-30.5176	-0.0305176	0	-0.0610352	0	0
197.5	3.41797	2.50244	2.0752	2.01416	2.86865	5.79834	8.8501	9.15527	8.54492	7.9956	8.36182	-0.0305176	0	-0.0610352	-0.0610352	-0.0305176	-30.5176	0.0305176	0	0.0305176	0.0305176	-0.0305176
197.6	3.41797	2.44141	2.0752	2.01416	2.80762	5.79834	8.91113	9.15527	8.48389	8.05664	8.36182	0.0305176	-0.0305176	-0.0305176	-0.0305176	-0.0305176	-30.5176	-0.0305176	-0.0305176	-0.0610352	-0.0305176	-0.0305176
197.7	3.41797	2.50244	2.0752	1.95312	2.74658	5.7373	8.91113	9.09424	8.48389	8.11768	8.36182	0.0610352	-0.0305176	-0.0305176	-0.0305176	0	-30.5176	0.0305176	-0.0610352	-0.0610352	0	-0.0305176
197.8	3.41797	2.56348	2.0752	1.95312	2.74658	5.67627	8.91113	9.09424	8.48389	8.17871	8.36182	0.0305176	-0.0305176	-0.0305176	0.0305176	0	0	0.0305176	-0.0305176	-0.0915527	-0.0305176	0
197.9	3.41797	2.56348	2.01416	1.89209	2.74658	5.67627	8.91113	9.15527	8.42285	8.17871	8.42285	0.0305176	-0.0305176	0	-0.0610352	-0.0610352	30.5176	0	-0.0610352	0	0	-0.0305176
198	3.479	2.62451	2.0752	1.83105	2.74658	5.67627	8.8501	9.15527	8.36182	8.11768	8.42285	0.0305176	-0.0305176	-0.0305176	-0.0305176	-0.0610352	30.5176	-0.0305176	0	-0.0610352	0	0
198.1	3.54004	2.68555	2.0752	1.83105	2.80762	5.67627	8.78906	9.15527	8.36182	8.11768	8.48389	0	-0.0305176	-0.0305176	0	-0.0610352	-61.0352	-0.0305176	-0.12207	-0.0305176	0.0305176	-0.0610352
198.2	3.54004	2.80762	2.13623	1.89209	2.80762	5.67627	8.72803	9.15527	8.36182	8.11768	8.48389	0	-0.0305176	-0.0610352	0	-0.0305176	0	0.0305176	-0.0305176	-0.0915527	-0.0305176	0
198.3	3.60107	2.86865	2.19727	1.95312	2.86865	5.67627	8.78906	9.09424	8.42285	8.05664	8.42285	0.0610352	-0.0305176	-0.0915527	0.0610352	0	-30.5176	0	0	0	0	-0.0305176
198.4	3.66211	2.80762	2.13623	1.95312	2.92969	5.7373	8.78906	9.09424	8.48389	8.11768	8.42285	0.0305176	0.0305176	0	0	0	0	0.0610352	0	-0.0610352	0	0
198.5	3.66211	2.74658	2.0752	1.95312	2.99072	5.7373	8.8501	9.0332	8.48389	8.11768	8.42285	0	-0.0305176	-0.0305176	-0.0305176	-0.0305176	30.5176	0	0	0	0.0610352	-0.0610352
198.6	3.60107	2.74658	2.01416	1.95312	3.05176	5.7373	8.8501	8.97217	8.54492	8.11768	8.36182	0.0610352	-0.0610352	0	-0.0305176	0	0	0	-0.0305176	-0.0610352	0.0305176	-0.0305176
198.7	3.54004	2.74658	2.01416	1.95312	3.11279	5.79834	8.8501	8.97217	8.48389	8.17871	8.30078	0	-0.0610352	-0.0305176	0	0	-91.5527	-0.0305176	-0.0610352	-0.0610352	0	-0.0610352
198.8	3.54004	2.68555	2.0752	2.01416	3.11279	5.79834	8.8501	9.0332	8.42285	8.17871	8.23975	0	-0.0305176	0	-0.0305176	0	-91.5527	-0.0305176	0	-0.0305176	0.0305176	-0.0915527
198.9	3.60107	2.68555	2.13623	2.0752	3.11279	5.85937	8.91113	9.09424	8.42285	8.17871	8.30078	-0.0305176	0	-0.0305176	-0.0610352	-0.0305176	0	0.0305176	0	-0.0305176	0	0
199	3.54004	2.74658	2.2583	2.0752	3.11279	5.85937	8.91113	9.09424	8.36182	8.11768	8.36182	0	0	-0.0610352	-0.0305176	-0.0915527	0	0	-0.0305176	0	0.0305176	-0.0610352
199.1	3.54004	2.80762	2.2583	2.0752	3.05176	5.92041	8.91113	9.15527	8.42285	8.11768	8.36182	0.0305176	-0.0305176	0	-0.0610352	-0.0305176	0	0.0305176	-0.0305176	0	0	-0.0305176
199.2	3.479	2.86865	2.31934	2.0752	2.92969	5.85937	8.8501	9.15527	8.42285	8.17871	8.42285	0.0305176	-0.0305176	-0.0305176	0	0	-30.5176	-0.0305176	-0.0305176	-0.0305176	-0.0305176	-0.0610352
199.3	3.479	2.86865	2.31934	2.01416	2.86865	5.85937	8.78906	9.15527	8.42285	8.11768	8.42285	0	-0.0610352	0	-0.0305176	0	-61.0352	-0.0610352	-0.0305176	-0.0610352	-0.0305176	-0.0305176
199.4	3.41797	2.74658	2.2583	1.95312	2.86865	5.79834	8.72803	9.09424	8.48389	8.11768	8.42285	0	-0.0610352	-0.0305176	-0.0305176	0.0305176	-30.5176	0.0305176	-0.0305176	-0.0915527	-0.0610352	-0.0610352
199.5	3.35693	2.68555	2.2583	1.89209	2.92969	5.79834	8.66699	9.09424	8.48389	8.05664	8.48389	0	0	0	-0.0305176	-0.0305176	-30.5176	0	0	0	0	-0.0305176
199.6	3.2959	2.62451	2.19727	1.89209	2.92969	5.92041	8.66699	9.15527	8.42285	8.05664	8.48389	0.0305176	-0.0305176	-0.0610352	-0.0610352	-0.0610352	0	-0.0305176	-0.0610352	-0.0305176	0.0305176	0
199.7	3.35693	2.62451	2.13623	1.95312	2.99072	5.98144	8.66699	9.21631	8.42285	8.05664	8.48389	0	-0.0305176	-0.0305176	0	-0.0610352	-30.5176	-0.0305176	-0.0610352	-0.0305176	0	0
199.8	3.35693	2.56348	2.13623	2.01416	3.11279	6.10352	8.72803	9.27734	8.36182	8.05664	8.48389	0.0305176	-0.0305176	0.0305176	-0.0305176	-0.0610352	30.5176	-0.0305176	0	-0.0305176	-0.0305176	-0.0305176
199.9	3.2959	2.56348	2.0752	2.01416	3.17383	6.10352	8.72803	9.39941	8.36182	8.11768	8.54492	-0.0610352	-0.0610352	-0.0610352	0	-0.0305176	-61.0352	-0.0610352	0	-0.0610352	0.0305176	-0.0305176
[truncated: 3,001 more rows]

## Sheet: I271V-4AP
﻿Time (ms)	Im_scaled (pA)	Im_scaled (pA)	Im_scaled (pA)	Im_scaled (pA)	Im_scaled (pA)	Im_scaled (pA)	Im_scaled (pA)	Im_scaled (pA)	Im_scaled (pA)	Im_scaled (pA)	Im_scaled (pA)	10_Vm (mV)	10_Vm (mV)	10_Vm (mV)	10_Vm (mV)	10_Vm (mV)	10_Vm (µV)	10_Vm (mV)	10_Vm (mV)	10_Vm (mV)	10_Vm (mV)	10_Vm (mV)
0.1	2.62451	4.63867	5.00488	4.94385	4.45557	4.21143	4.02832	4.3335	4.3335	4.02832	4.3335	0.0305176	-0.0305176	0	0.0305176	-0.0305176	30.5176	0	0	0	0	-0.0610352
0.2	2.56348	4.63867	5.06592	4.94385	4.39453	4.3335	4.02832	4.27246	4.3335	4.08936	4.3335	-0.0305176	-0.0305176	-0.0610352	0.0610352	-0.0305176	-30.5176	0	0.0305176	0.0305176	-0.0915527	-0.0305176
0.3	2.56348	4.69971	5.12695	4.94385	4.39453	4.39453	4.02832	4.27246	4.27246	4.08936	4.27246	0.0305176	-0.0305176	0	0	0	0	0.0305176	-0.0305176	-0.0305176	0	-0.0610352
0.4	2.62451	4.76074	5.12695	4.94385	4.39453	4.3335	4.02832	4.27246	4.21143	4.15039	4.21143	0.0305176	0	-0.0305176	0	0.0305176	-61.0352	0	-0.0305176	-0.0305176	-0.0305176	-0.0305176
0.5	2.62451	4.82178	5.06592	4.94385	4.39453	4.27246	4.02832	4.21143	4.21143	4.08936	4.15039	0.0305176	-0.0610352	0	0.0305176	-0.0610352	-30.5176	0	-0.0305176	-0.0610352	0	0.0305176
0.6	2.74658	4.82178	5.00488	4.94385	4.39453	4.21143	4.02832	4.21143	4.21143	4.08936	4.15039	-0.0305176	-0.0305176	0	0	0	-30.5176	0	-0.0915527	-0.0305176	-0.0305176	0.0305176
0.7	2.80762	4.88281	5.00488	5.00488	4.3335	4.15039	4.02832	4.21143	4.21143	4.08936	4.15039	-0.0610352	0	-0.0305176	-0.0305176	0	-30.5176	0	-0.0305176	-0.0305176	0	0
0.8	2.86865	4.88281	5.00488	5.00488	4.3335	4.15039	4.08936	4.21143	4.21143	4.15039	4.15039	0	0	-0.0305176	0.0305176	-0.0305176	-30.5176	0.0305176	-0.0305176	0.0610352	-0.0610352	-0.0305176
0.9	2.92969	4.82178	5.00488	5.00488	4.3335	4.21143	4.15039	4.21143	4.21143	4.15039	4.15039	0.0915527	0	-0.0305176	0	0.0305176	0	-0.0610352	-0.0610352	0	-0.0610352	0
1	2.99072	4.82178	5.00488	5.06592	4.39453	4.21143	4.21143	4.21143	4.15039	4.08936	4.15039	0.0305176	-0.0305176	0	0.0610352	0	-91.5527	-0.0305176	-0.0305176	0	-0.0610352	-0.0305176
1.1	2.99072	4.82178	4.94385	5.06592	4.45557	4.21143	4.27246	4.21143	4.15039	3.96728	4.08936	0.0305176	-0.0305176	0.0305176	0	0.0305176	-61.0352	0.0305176	-0.0610352	-0.0305176	-0.0610352	0
1.2	2.92969	4.82178	5.00488	5.12695	4.45557	4.21143	4.27246	4.15039	4.15039	3.90625	4.08936	0	-0.0305176	0.0305176	0	-0.0610352	-30.5176	0.0305176	-0.0305176	0	-0.0305176	-0.0305176
1.3	2.80762	4.88281	5.00488	5.18799	4.45557	4.21143	4.3335	4.08936	4.15039	3.90625	4.02832	0	-0.0305176	0	0	-0.0305176	-30.5176	0.0915527	-0.0305176	-0.0610352	-0.0305176	0
1.4	2.74658	4.94385	5.00488	5.18799	4.45557	4.21143	4.27246	4.08936	4.15039	3.96728	4.08936	-0.0305176	-0.0305176	0.0305176	0	-0.0305176	-30.5176	0.0610352	-0.0610352	-0.0610352	-0.0915527	-0.0305176
1.5	2.80762	5.00488	5.00488	5.12695	4.39453	4.21143	4.27246	4.08936	4.15039	3.90625	4.08936	-0.0305176	-0.0610352	0	0.0305176	0	-61.0352	0	-0.0610352	0.0610352	-0.0610352	-0.0610352
1.6	2.86865	4.94385	5.00488	5.06592	4.39453	4.3335	4.21143	4.15039	4.21143	3.90625	4.08936	0.0610352	-0.0610352	0.0610352	0.0305176	0	0	-0.0610352	-0.0610352	0.0305176	-0.0305176	-0.0305176
1.7	2.92969	4.88281	5.06592	5.06592	4.27246	4.3335	4.15039	4.21143	4.27246	3.90625	4.08936	0	0	0.0305176	0	-0.0305176	-30.5176	0	0	-0.0305176	-0.0610352	-0.0610352
1.8	2.99072	4.88281	5.00488	5.00488	4.21143	4.45557	4.15039	4.15039	4.3335	3.96728	4.08936	0	0	0.0610352	-0.0305176	-0.0305176	30.5176	0.0305176	-0.0305176	-0.0305176	-0.0610352	-0.0305176
1.9	2.92969	4.94385	5.00488	5.00488	4.08936	4.45557	4.21143	4.15039	4.3335	3.96728	4.08936	0	-0.0305176	-0.0305176	0	-0.0305176	0	0	0	-0.0305176	-0.0610352	-0.0610352
2	2.86865	5.06592	4.94385	5.00488	4.08936	4.45557	4.27246	4.15039	4.3335	3.96728	4.08936	0	-0.0305176	0	0	0.0305176	-30.5176	0.0305176	-0.0305176	-0.0915527	-0.0610352	-0.0610352
2.1	2.80762	5.06592	4.88281	5.06592	4.15039	4.5166	4.27246	4.21143	4.27246	3.96728	4.15039	0.0305176	-0.0610352	0.0305176	0.0305176	-0.0305176	-152.588	0	-0.0610352	0	-0.0305176	-0.0305176
2.2	2.74658	5.06592	4.88281	5.06592	4.21143	4.5166	4.27246	4.27246	4.21143	3.96728	4.21143	-0.0610352	-0.0305176	0.0305176	0	-0.0305176	-30.5176	0	-0.0915527	0	-0.0305176	-0.0305176
2.3	2.74658	4.94385	4.88281	5.06592	4.27246	4.5166	4.21143	4.3335	4.15039	3.96728	4.21143	0.0305176	-0.0305176	0.0305176	0.0305176	-0.0305176	0	0.0305176	-0.0305176	-0.0305176	0	-0.0305176
2.4	2.74658	4.88281	4.88281	5.06592	4.27246	4.5166	4.21143	4.3335	4.15039	3.96728	4.21143	-0.0305176	-0.0305176	0.0305176	0.0305176	-0.0610352	0	0	-0.0305176	-0.0610352	-0.0305176	0
2.5	2.74658	4.82178	4.88281	5.12695	4.21143	4.57764	4.15039	4.27246	4.15039	3.96728	4.15039	0.0305176	0	0	0.0610352	-0.0305176	0	0.0305176	-0.0305176	0	-0.0610352	-0.0305176
2.6	2.74658	4.82178	4.82178	5.06592	4.21143	4.57764	4.15039	4.15039	4.15039	3.90625	4.15039	0.0305176	0	0.0305176	0.0610352	-0.0305176	-61.0352	-0.0305176	-0.0305176	0.0305176	-0.0305176	-0.0610352
2.7	2.68555	4.88281	4.82178	5.12695	4.21143	4.5166	4.15039	4.08936	4.08936	3.90625	4.21143	0.0610352	0	0	0.0305176	0	-91.5527	-0.0305176	-0.0610352	0.0610352	-0.0610352	-0.0610352
2.8	2.68555	4.88281	4.76074	5.06592	4.27246	4.45557	4.15039	4.08936	4.02832	3.90625	4.21143	0.0305176	-0.0305176	0	0	-0.0305176	-30.5176	0	0	-0.0305176	-0.0305176	-0.0610352
2.9	2.68555	4.94385	4.82178	5.06592	4.3335	4.39453	4.02832	4.08936	4.02832	3.84521	4.21143	0.0305176	-0.0305176	0	-0.0305176	0	-30.5176	0.0305176	0	-0.0610352	-0.0305176	-0.0305176
3	2.74658	4.94385	4.76074	5.06592	4.3335	4.39453	4.02832	4.02832	4.15039	3.84521	4.21143	0	-0.0610352	-0.0610352	0	0	0	0.0610352	-0.0610352	-0.0610352	0	-0.0305176
3.1	2.74658	4.88281	4.82178	5.06592	4.27246	4.5166	4.08936	4.02832	4.27246	3.84521	4.15039	0	-0.0610352	-0.0305176	0	0.0305176	-61.0352	0	-0.0610352	-0.0305176	-0.0305176	-0.0610352
3.2	2.74658	4.88281	4.88281	5.12695	4.21143	4.57764	4.15039	4.02832	4.3335	3.84521	4.08936	-0.0305176	-0.0915527	0	0.0305176	-0.0305176	-30.5176	-0.0305176	-0.0915527	0	-0.0305176	-0.0305176
3.3	2.74658	4.94385	4.94385	5.12695	4.15039	4.57764	4.15039	3.96728	4.39453	3.96728	4.02832	-0.0305176	-0.0305176	0.0305176	0.0305176	-0.0305176	0	-0.0305176	-0.0915527	0.0305176	-0.0305176	-0.0305176
3.4	2.62451	4.94385	5.00488	5.12695	4.15039	4.57764	4.15039	4.02832	4.39453	4.02832	3.96728	0.0305176	-0.0610352	0	-0.0305176	-0.0305176	0	0.0305176	-0.0305176	0.0305176	-0.0610352	-0.0305176
3.5	2.56348	4.94385	5.00488	5.12695	4.15039	4.5166	4.15039	4.08936	4.39453	4.08936	3.90625	0.0305176	-0.0305176	-0.0305176	0	-0.0305176	0	0.0610352	-0.0305176	-0.0610352	-0.0915527	-0.0305176
3.6	2.50244	4.94385	5.06592	5.18799	4.21143	4.45557	4.08936	4.15039	4.3335	4.08936	3.96728	0	-0.0305176	-0.0305176	-0.0305176	0	-30.5176	0	0.0305176	-0.0305176	-0.0610352	-0.0610352
3.7	2.56348	4.94385	5.06592	5.24902	4.27246	4.3335	4.02832	4.15039	4.3335	4.08936	4.02832	0.0610352	-0.0915527	-0.0305176	0.0305176	0.0305176	-122.07	-0.0305176	-0.0305176	-0.12207	-0.0915527	-0.0915527
3.8	2.62451	4.94385	5.06592	5.24902	4.27246	4.3335	4.08936	4.15039	4.27246	4.08936	4.08936	-0.0305176	-0.0305176	0	0	0	-91.5527	0	-0.0610352	-0.0305176	0.0305176	-0.0610352
3.9	2.74658	5.00488	5.00488	5.18799	4.27246	4.21143	4.08936	4.21143	4.27246	4.08936	4.21143	-0.0305176	-0.0610352	0.0305176	-0.0305176	0	0	0.0305176	-0.0610352	0	0.0305176	-0.0610352
4	2.86865	5.12695	4.94385	5.12695	4.27246	4.15039	4.21143	4.27246	4.15039	4.15039	4.27246	0.0305176	-0.0610352	0	0.0305176	-0.0305176	0	0.0610352	-0.0305176	-0.0305176	-0.0305176	0
4.1	2.86865	5.18799	4.88281	5.18799	4.27246	4.08936	4.27246	4.27246	4.15039	4.21143	4.27246	-0.0305176	-0.0305176	-0.0305176	0	-0.0305176	0	-0.0305176	-0.0305176	-0.0610352	-0.0610352	0.0305176
4.2	2.86865	5.12695	4.88281	5.18799	4.27246	3.96728	4.3335	4.27246	4.15039	4.21143	4.21143	0	0	-0.0305176	0.0305176	0.0305176	-30.5176	0.0305176	-0.0305176	-0.0305176	-0.0305176	-0.0305176
4.3	2.74658	5.06592	4.82178	5.24902	4.3335	3.96728	4.39453	4.21143	4.15039	4.15039	4.15039	0.0305176	0	-0.0610352	0.0305176	0.0305176	0	-0.0305176	-0.0610352	0.0610352	-0.0305176	-0.0915527
4.4	2.68555	4.94385	4.82178	5.31006	4.3335	3.96728	4.45557	4.15039	4.21143	4.15039	4.08936	0.0305176	0	-0.0305176	0.0305176	0.0305176	-91.5527	0	-0.0610352	-0.0305176	-0.0305176	-0.0305176
4.5	2.56348	4.88281	4.76074	5.31006	4.39453	3.96728	4.45557	4.08936	4.15039	4.15039	4.08936	0	-0.0610352	-0.0305176	0	-0.0305176	-30.5176	0.0610352	-0.0610352	0	-0.0305176	-0.0915527
4.6	2.56348	4.82178	4.76074	5.31006	4.39453	3.96728	4.39453	4.02832	4.15039	4.15039	4.02832	0	-0.0305176	-0.0305176	-0.0305176	-0.0305176	-61.0352	0.0915527	0	0	-0.0305176	0.0305176
4.7	2.56348	4.82178	4.82178	5.18799	4.3335	3.96728	4.27246	3.96728	4.15039	4.15039	4.02832	0	-0.0610352	0	0	-0.0305176	0	0.0305176	-0.0915527	-0.0305176	-0.0610352	0
4.8	2.62451	4.88281	4.82178	5.12695	4.27246	4.02832	4.15039	3.96728	4.15039	4.15039	3.96728	-0.0610352	-0.0305176	0	-0.0305176	0	-61.0352	-0.0305176	-0.0610352	-0.0305176	-0.0915527	-0.0610352
4.9	2.80762	4.94385	4.88281	5.06592	4.21143	4.02832	4.02832	3.90625	4.08936	4.02832	3.90625	-0.0305176	0	-0.0610352	0.0305176	0.0305176	-30.5176	0	-0.0610352	0	0	-0.0305176
5	2.92969	4.94385	4.88281	5.06592	4.21143	4.08936	4.02832	3.90625	3.96728	3.96728	3.84521	-0.0305176	0	0	0	0.0305176	-30.5176	-0.0305176	-0.0305176	0	-0.0610352	-0.0915527
5.1	2.92969	5.06592	4.94385	5.12695	4.21143	4.08936	4.02832	3.96728	3.84521	3.96728	3.90625	0	-0.0305176	-0.0305176	-0.0610352	-0.0305176	-30.5176	-0.0305176	0.0305176	0.0305176	-0.0610352	-0.0305176
5.2	2.86865	5.12695	5.00488	5.12695	4.27246	4.02832	4.08936	4.02832	3.90625	3.96728	3.96728	0	-0.0305176	-0.0305176	0	-0.0305176	30.5176	0	-0.0610352	0	-0.0915527	0.0305176
5.3	2.86865	5.06592	5.06592	5.12695	4.27246	4.02832	4.15039	4.08936	4.02832	4.02832	4.08936	-0.0305176	0.0305176	-0.0305176	0.0305176	-0.0305176	-30.5176	0.0610352	-0.0610352	0	-0.0610352	-0.0305176
5.4	2.86865	5.06592	5.06592	5.18799	4.27246	4.02832	4.21143	4.08936	4.15039	4.08936	4.15039	0.0305176	-0.0305176	-0.0305176	-0.0305176	0	-30.5176	0	-0.0305176	-0.0610352	0.0305176	-0.0305176
5.5	2.86865	5.00488	5.00488	5.31006	4.21143	4.08936	4.21143	4.02832	4.3335	4.08936	4.27246	0	0	0	-0.0305176	0	-30.5176	0.0305176	-0.0610352	0	0.0305176	-0.0305176
5.6	2.80762	5.00488	4.94385	5.37109	4.21143	4.15039	4.21143	4.02832	4.39453	4.08936	4.3335	0.0305176	-0.0610352	0	0	0	-30.5176	-0.0610352	-0.0610352	-0.0610352	-0.0610352	-0.0610352
5.7	2.80762	5.00488	4.94385	5.31006	4.27246	4.21143	4.21143	4.02832	4.3335	4.15039	4.3335	-0.0915527	-0.0305176	0	0	-0.0610352	0	0	-0.0610352	-0.0305176	0	0
5.8	2.74658	4.94385	5.00488	5.24902	4.27246	4.3335	4.21143	4.02832	4.27246	4.15039	4.27246	-0.0305176	0.0305176	0	0	-0.0305176	30.5176	0	-0.0305176	0.0305176	-0.0610352	-0.0610352
5.9	2.74658	4.94385	5.06592	5.18799	4.21143	4.39453	4.15039	4.02832	4.21143	4.08936	4.21143	-0.0305176	0.0305176	0	0	-0.0305176	-30.5176	0	0.0305176	0	-0.0610352	-0.0305176
6	2.74658	4.94385	5.06592	5.12695	4.15039	4.39453	4.15039	3.96728	4.15039	4.02832	4.15039	-0.0305176	0	0	0.0305176	-0.0610352	0	-0.0305176	-0.0305176	-0.0305176	-0.0915527	-0.0610352
6.1	2.74658	4.94385	5.00488	5.12695	4.15039	4.39453	4.21143	3.96728	4.15039	3.96728	4.15039	0	0	-0.0305176	-0.0305176	0	0	0	0	0	-0.0305176	-0.0610352
6.2	2.80762	4.88281	5.00488	5.12695	4.08936	4.39453	4.21143	4.02832	4.21143	3.90625	4.08936	0.0610352	0.0305176	-0.0305176	-0.0305176	0.0610352	-61.0352	-0.0305176	-0.0305176	-0.0305176	0	-0.0610352
6.3	2.80762	4.82178	4.94385	5.12695	4.08936	4.39453	4.15039	4.08936	4.27246	3.90625	4.02832	-0.0610352	-0.0610352	-0.0305176	0	-0.0305176	0	-0.0305176	-0.0305176	0	-0.0610352	0
6.4	2.80762	4.88281	5.00488	5.12695	4.08936	4.39453	4.08936	4.08936	4.3335	3.90625	3.90625	-0.0305176	-0.0610352	-0.0305176	0	-0.0305176	30.5176	0	-0.0305176	-0.0610352	-0.0610352	0
6.5	2.80762	4.82178	5.00488	5.12695	4.15039	4.39453	4.02832	4.08936	4.39453	3.90625	3.90625	-0.0610352	-0.0305176	0.0305176	-0.0305176	-0.0610352	0	0	0	0	0.0305176	-0.0305176
6.6	2.80762	4.82178	4.94385	5.12695	4.21143	4.45557	4.02832	4.02832	4.3335	3.96728	3.90625	0	0	0	-0.0305176	-0.0305176	-30.5176	-0.0305176	0	0.0305176	-0.0305176	-0.0305176
6.7	2.80762	4.82178	4.82178	5.12695	4.21143	4.39453	4.02832	4.02832	4.21143	3.96728	3.96728	0.0610352	-0.0305176	-0.0305176	-0.0610352	0	-30.5176	-0.0305176	-0.0610352	-0.0305176	-0.0305176	-0.0305176
6.8	2.86865	4.88281	4.82178	5.18799	4.21143	4.39453	4.02832	4.02832	4.08936	3.96728	4.15039	0.0305176	0	-0.0305176	0	-0.0305176	-30.5176	-0.0610352	0	0	0	-0.0305176
6.9	2.86865	4.94385	4.82178	5.24902	4.21143	4.39453	4.08936	4.02832	4.02832	3.96728	4.15039	-0.0305176	0.0610352	-0.0915527	-0.0305176	0.0305176	-30.5176	0	0	0	0	-0.0915527
7	2.92969	5.00488	4.88281	5.24902	4.21143	4.39453	4.08936	3.96728	3.96728	4.02832	4.02832	0	0	-0.0305176	0	0.0305176	0	0	0.0305176	-0.0610352	0	0.0305176
7.1	2.99072	5.00488	4.88281	5.18799	4.15039	4.3335	4.08936	4.02832	3.96728	4.02832	3.90625	0	-0.0305176	-0.0610352	-0.0610352	0	-61.0352	0	-0.0305176	0	0	0.0305176
7.2	2.99072	5.00488	4.94385	5.12695	4.15039	4.3335	4.15039	4.02832	4.08936	4.02832	3.84521	-0.0610352	-0.0305176	0.0305176	-0.0305176	-0.0305176	0	0.0305176	-0.0305176	-0.0305176	-0.0305176	0
7.3	2.92969	5.00488	4.88281	5.12695	4.21143	4.3335	4.15039	4.02832	4.15039	4.02832	3.90625	-0.0305176	-0.0305176	0	0	-0.0305176	-61.0352	0	-0.0305176	-0.0305176	-0.0305176	0
7.4	2.86865	4.94385	4.88281	5.12695	4.21143	4.3335	4.15039	4.08936	4.08936	4.02832	3.90625	-0.0305176	-0.0305176	-0.0305176	-0.0610352	-0.0305176	-30.5176	0	-0.0610352	0	0.0305176	-0.0305176
7.5	2.80762	4.88281	4.88281	5.12695	4.21143	4.3335	4.21143	4.08936	4.15039	3.96728	3.90625	0	0	0.0305176	0.0305176	-0.0610352	-30.5176	-0.0610352	0	0.0305176	-0.0305176	-0.0305176
7.6	2.74658	4.88281	4.94385	5.12695	4.15039	4.27246	4.21143	4.08936	4.15039	3.90625	3.90625	-0.0305176	0	0	0	-0.0305176	-30.5176	-0.0305176	0.0305176	-0.0305176	0	-0.0610352
7.7	2.74658	4.88281	5.00488	5.12695	4.08936	4.27246	4.21143	4.02832	4.21143	3.84521	3.84521	0	0	0	0	-0.0305176	0	0.0305176	0	0	-0.0305176	-0.0305176
7.8	2.86865	4.82178	5.06592	5.06592	4.02832	4.27246	4.27246	3.96728	4.27246	3.84521	3.84521	0	0	-0.0305176	-0.0305176	-0.0305176	-61.0352	0	-0.0305176	0	-0.0610352	0.0305176
7.9	2.92969	4.82178	5.12695	5.06592	4.02832	4.27246	4.27246	3.96728	4.27246	3.84521	3.84521	0.0305176	-0.0305176	-0.0305176	-0.0305176	0.0305176	-61.0352	0	-0.0305176	0	-0.0305176	0
8	2.99072	4.82178	5.06592	5.06592	4.08936	4.3335	4.21143	3.96728	4.39453	3.84521	3.90625	-0.0610352	-0.0915527	-0.0305176	-0.0610352	-0.0305176	-30.5176	-0.0305176	-0.0305176	-0.0610352	0	0.0305176
8.1	2.99072	4.82178	5.00488	5.06592	4.08936	4.3335	4.15039	4.02832	4.39453	3.84521	3.96728	-0.0610352	-0.0305176	0.0305176	-0.0305176	-0.0305176	-30.5176	-0.0305176	-0.0305176	0	-0.0305176	0.0305176
8.2	2.99072	4.88281	4.94385	5.00488	4.15039	4.39453	4.08936	3.96728	4.39453	3.84521	3.96728	-0.12207	0.0305176	-0.0305176	-0.0610352	-0.0610352	30.5176	0	-0.0305176	-0.0305176	0	-0.0610352
8.3	3.05176	4.94385	4.94385	5.00488	4.15039	4.39453	4.02832	3.96728	4.39453	3.84521	3.96728	-0.0305176	0	0	-0.0305176	0	61.0352	-0.0610352	0.0610352	0.0305176	-0.12207	0
8.4	2.99072	5.00488	4.94385	5.00488	4.15039	4.39453	4.02832	3.96728	4.3335	3.84521	3.96728	-0.0610352	0.0915527	-0.0610352	0.0305176	-0.0305176	0	-0.0305176	-0.0305176	-0.0305176	-0.0305176	0
8.5	2.92969	5.00488	4.88281	5.06592	4.08936	4.3335	4.02832	3.96728	4.21143	3.90625	3.96728	-0.0305176	0.0305176	-0.0305176	0	0	0	-0.0610352	0	-0.0305176	0	-0.0305176
8.6	2.80762	5.00488	4.88281	5.12695	4.08936	4.27246	4.08936	3.96728	4.08936	3.90625	4.08936	-0.0305176	0.0610352	-0.0915527	-0.0610352	0	-30.5176	-0.0305176	0	-0.0305176	0	-0.0305176
8.7	2.74658	4.94385	4.82178	5.12695	4.15039	4.27246	4.08936	4.02832	4.02832	3.84521	4.15039	-0.0610352	0	-0.0305176	-0.0305176	-0.0305176	0	-0.0305176	-0.0305176	-0.0915527	0	-0.0610352
8.8	2.80762	4.88281	4.88281	5.18799	4.21143	4.3335	4.02832	4.08936	3.96728	3.72314	4.15039	-0.0915527	0	-0.0305176	-0.0305176	-0.0610352	30.5176	0	-0.0305176	-0.0305176	0	0.0305176
8.9	2.86865	4.82178	4.88281	5.18799	4.21143	4.39453	4.08936	4.15039	3.96728	3.72314	4.15039	-0.0915527	0	0.0305176	-0.0305176	0.0305176	0	-0.0305176	-0.0305176	-0.0305176	0.0305176	0
9	2.92969	4.82178	4.88281	5.18799	4.21143	4.45557	4.08936	4.21143	4.02832	3.66211	4.08936	-0.0305176	0.0305176	-0.0610352	-0.0305176	-0.0305176	0	-0.0305176	0.0305176	-0.0305176	0	0
9.1	2.99072	4.82178	4.88281	5.12695	4.15039	4.45557	4.15039	4.27246	4.02832	3.72314	4.08936	-0.0305176	0.0610352	-0.0305176	0.0305176	0	0	-0.0915527	-0.0305176	-0.0305176	-0.0305176	-0.0305176
9.2	2.92969	4.82178	4.82178	5.06592	4.15039	4.39453	4.15039	4.21143	4.02832	3.78418	4.08936	-0.0305176	0.0305176	-0.0305176	-0.0610352	-0.0610352	30.5176	-0.0305176	0	-0.0305176	-0.0305176	-0.0305176
9.3	2.92969	4.82178	4.82178	5.06592	4.15039	4.39453	4.15039	4.21143	4.02832	3.72314	4.08936	-0.0915527	0	-0.0610352	-0.0915527	-0.0305176	30.5176	0	-0.0305176	-0.0305176	0.0305176	0.0305176
9.4	2.86865	4.82178	4.82178	5.00488	4.15039	4.27246	4.15039	4.15039	4.08936	3.72314	4.02832	-0.0610352	0	-0.0610352	-0.0610352	-0.0915527	30.5176	0.0305176	0.0305176	-0.0610352	0	0
9.5	2.86865	4.76074	4.82178	5.00488	4.15039	4.27246	4.15039	4.08936	4.15039	3.72314	4.02832	0	0.0305176	-0.0610352	0	0	-30.5176	0	-0.0305176	-0.0305176	-0.0305176	0.0610352
9.6	2.86865	4.69971	4.82178	5.00488	4.15039	4.21143	4.15039	4.02832	4.21143	3.78418	3.96728	-0.0610352	0.0305176	0	0	0.0305176	-30.5176	-0.0305176	-0.0305176	0	-0.0305176	0.0305176
9.7	2.80762	4.63867	4.76074	5.06592	4.08936	4.21143	4.08936	3.90625	4.27246	3.84521	4.02832	-0.0610352	0	0	-0.0915527	0	30.5176	-0.0610352	-0.0610352	0	0	0
9.8	2.74658	4.63867	4.82178	5.12695	4.02832	4.27246	4.08936	3.84521	4.21143	3.96728	4.02832	-0.0610352	0	0.0305176	-0.0305176	-0.0305176	-30.5176	-0.0610352	-0.0305176	0.0305176	0	0
9.9	2.74658	4.63867	4.88281	5.12695	4.08936	4.3335	4.02832	3.84521	4.08936	4.02832	4.08936	-0.0305176	0.0305176	0	-0.0305176	-0.0610352	0	-0.0305176	-0.0305176	0	-0.0305176	0
10	2.74658	4.69971	4.88281	5.12695	4.08936	4.39453	4.02832	3.84521	4.08936	4.02832	4.08936	-0.0610352	0.0305176	0	-0.0915527	-0.0305176	30.5176	-0.0610352	0.0305176	0	-0.0305176	0
10.1	2.74658	4.69971	4.94385	5.12695	4.15039	4.3335	4.08936	3.96728	4.08936	4.02832	4.08936	-0.0305176	0.0610352	-0.0305176	-0.0610352	-0.0305176	0	-0.0305176	0	-0.0610352	-0.0305176	0
10.2	2.74658	4.76074	4.94385	5.18799	4.21143	4.27246	4.21143	4.02832	4.08936	3.96728	4.15039	-0.0610352	0.0305176	-0.0610352	-0.0305176	0.0305176	-61.0352	-0.0610352	0.0305176	-0.0305176	0.0305176	-0.0305176
10.3	2.80762	4.82178	4.94385	5.24902	4.15039	4.21143	4.3335	4.08936	4.08936	3.96728	4.21143	-0.0305176	0.0305176	-0.0305176	-0.0610352	0	-30.5176	-0.0610352	-0.0305176	0	0	-0.0305176
10.4	2.80762	4.82178	4.94385	5.24902	4.15039	4.15039	4.39453	4.02832	4.15039	3.90625	4.21143	-0.0305176	-0.0305176	0	-0.0610352	0	-30.5176	-0.0610352	0	-0.0305176	0.0610352	-0.0610352
10.5	2.86865	4.88281	4.88281	5.24902	4.21143	4.08936	4.39453	4.02832	4.08936	3.90625	4.21143	-0.0610352	0	-0.0305176	-0.0305176	-0.0305176	30.5176	-0.0305176	0	-0.0305176	-0.0305176	-0.0305176
10.6	2.92969	4.88281	4.88281	5.24902	4.27246	4.02832	4.27246	4.02832	4.02832	3.90625	4.15039	-0.0305176	-0.0610352	-0.0305176	-0.0610352	0	30.5176	0	0	-0.0610352	-0.0610352	-0.0305176
10.7	2.92969	4.88281	4.88281	5.18799	4.3335	4.08936	4.21143	4.02832	4.02832	3.84521	4.08936	-0.0305176	0.0305176	-0.0610352	-0.0305176	0	-30.5176	-0.0915527	0.0610352	-0.0305176	0	0
10.8	2.92969	4.88281	4.88281	5.12695	4.27246	4.08936	4.21143	4.02832	4.02832	3.84521	4.08936	0.0305176	0	-0.0305176	-0.0305176	0.0305176	0	-0.0610352	0	-0.0305176	-0.0305176	0.0305176
10.9	2.86865	4.88281	4.82178	5.06592	4.27246	4.15039	4.27246	4.02832	4.08936	3.84521	4.15039	-0.0305176	0	-0.0305176	-0.0305176	0	0	-0.0305176	0	0	0.0305176	-0.0305176
11	2.86865	4.88281	4.82178	5.06592	4.21143	4.21143	4.3335	4.02832	4.02832	3.84521	4.21143	-0.0610352	0	-0.0305176	-0.0610352	-0.0305176	61.0352	0	0	-0.0610352	-0.0305176	0
11.1	2.80762	4.88281	4.88281	5.00488	4.15039	4.21143	4.3335	4.02832	4.02832	3.78418	4.27246	-0.0610352	0	-0.0305176	-0.0610352	-0.0610352	0	0	0.0610352	-0.0610352	0.0305176	0.0610352
11.2	2.80762	5.00488	4.94385	5.00488	4.21143	4.27246	4.21143	4.02832	4.02832	3.78418	4.3335	-0.0915527	0.0305176	-0.0610352	-0.12207	-0.0305176	-30.5176	0	-0.0305176	-0.0305176	0.0305176	0.0305176
11.3	2.80762	5.00488	5.00488	5.06592	4.21143	4.21143	4.15039	4.02832	3.96728	3.78418	4.27246	-0.0610352	0.0305176	0.0305176	-0.0610352	0.0305176	-61.0352	-0.0305176	-0.0305176	-0.0305176	0.0305176	0
11.4	2.86865	5.06592	5.00488	5.00488	4.27246	4.21143	4.02832	3.96728	3.90625	3.78418	4.21143	-0.0305176	0	-0.0305176	0	0	-30.5176	-0.0610352	-0.0305176	0	0	0
11.5	2.86865	5.06592	4.94385	5.00488	4.27246	4.21143	4.08936	4.02832	3.90625	3.78418	4.15039	0.0305176	0.0305176	0.0305176	-0.0305176	-0.0305176	30.5176	-0.0915527	0	0	0.0305176	0
11.6	2.86865	5.06592	4.94385	4.94385	4.21143	4.21143	4.08936	4.02832	3.90625	3.78418	4.08936	-0.0305176	0	-0.0305176	-0.0305176	0	0	0	0.0305176	-0.0305176	0	0.0305176
11.7	2.86865	5.06592	4.82178	5.00488	4.15039	4.21143	4.08936	4.02832	3.84521	3.78418	4.15039	0.0305176	-0.0610352	0	-0.0305176	-0.0305176	0	-0.0610352	0.0305176	-0.0305176	-0.0305176	0
11.8	2.86865	5.00488	4.82178	5.12695	4.08936	4.15039	4.15039	4.08936	3.84521	3.78418	4.27246	-0.0915527	0	-0.0610352	0	0.0305176	0	-0.0915527	0.0305176	-0.0305176	0	0
11.9	2.92969	4.94385	4.76074	5.18799	4.08936	4.08936	4.15039	4.15039	3.96728	3.72314	4.3335	-0.0305176	0	0	0	0	-61.0352	-0.12207	0.0610352	-0.0305176	0	-0.0305176
12	2.92969	4.88281	4.82178	5.24902	4.15039	4.08936	4.21143	4.15039	3.96728	3.78418	4.3335	-0.0305176	-0.0305176	0	-0.0305176	0	-61.0352	-0.0305176	-0.0305176	0	0.0305176	0
12.1	2.86865	4.82178	4.88281	5.24902	4.21143	4.08936	4.27246	4.15039	3.96728	3.84521	4.27246	-0.0610352	-0.0305176	0	-0.0610352	-0.0305176	0	-0.0305176	0	0.0305176	-0.0305176	0.0915527
12.2	2.86865	4.76074	4.94385	5.24902	4.21143	4.21143	4.27246	4.15039	3.96728	3.96728	4.21143	-0.0610352	-0.0305176	0.0305176	-0.0305176	-0.0610352	30.5176	-0.0305176	0.0305176	-0.0610352	-0.0305176	0.0610352
12.3	2.80762	4.76074	5.00488	5.18799	4.21143	4.27246	4.27246	4.15039	3.90625	4.02832	4.15039	-0.0610352	-0.0305176	-0.0305176	0	-0.0305176	30.5176	-0.0305176	0.0610352	-0.0305176	-0.0305176	0.0610352
12.4	2.80762	4.82178	5.06592	5.12695	4.21143	4.27246	4.21143	4.15039	3.90625	4.02832	4.21143	-0.0305176	0.0305176	-0.0610352	-0.0610352	0	-30.5176	-0.0305176	0.0610352	-0.0305176	-0.0305176	0
12.5	2.80762	4.88281	5.06592	5.06592	4.27246	4.27246	4.21143	4.15039	3.84521	3.96728	4.21143	-0.0305176	0.0305176	-0.0610352	0	0	-30.5176	-0.0610352	0	-0.0305176	0.0305176	0
12.6	2.80762	4.88281	5.06592	5.06592	4.27246	4.15039	4.21143	4.15039	3.84521	3.90625	4.21143	-0.0305176	-0.0305176	-0.0305176	-0.0610352	-0.0305176	30.5176	-0.0610352	0	-0.0305176	0.0305176	0.0305176
12.7	2.80762	4.94385	5.00488	5.06592	4.3335	4.15039	4.27246	4.15039	3.84521	3.78418	4.15039	-0.0305176	-0.0305176	-0.0610352	-0.0610352	-0.0305176	30.5176	-0.0305176	0	0	0.0305176	0.0305176
12.8	2.80762	4.94385	4.94385	5.12695	4.39453	4.08936	4.3335	4.21143	3.90625	3.78418	4.08936	-0.0305176	-0.0305176	-0.0305176	-0.0610352	0	0	0	0	-0.0610352	0	0.0305176
12.9	2.80762	4.94385	4.82178	5.18799	4.39453	4.08936	4.3335	4.21143	4.02832	3.78418	4.08936	-0.0610352	-0.0305176	-0.0305176	-0.0305176	0	-30.5176	-0.0610352	-0.0305176	-0.0305176	0	0.0305176
13	2.86865	4.94385	4.69971	5.18799	4.3335	4.08936	4.27246	4.21143	4.02832	3.78418	4.08936	-0.0305176	-0.0305176	-0.0610352	-0.0305176	-0.0610352	-61.0352	-0.0305176	0	-0.0610352	0.0915527	-0.0305176
13.1	2.86865	4.82178	4.63867	5.18799	4.27246	4.15039	4.21143	4.21143	4.08936	3.84521	4.08936	-0.0305176	0.0305176	-0.0305176	-0.0305176	-0.0305176	0	-0.0610352	-0.0305176	0.0305176	0	0
13.2	2.99072	4.76074	4.63867	5.18799	4.21143	4.15039	4.21143	4.21143	4.08936	3.84521	4.15039	-0.0305176	0	0.0305176	-0.0305176	0	0	-0.0610352	-0.0305176	0	-0.0305176	0.0305176
13.3	3.05176	4.69971	4.69971	5.18799	4.21143	4.08936	4.21143	4.27246	4.02832	3.84521	4.08936	-0.0305176	0	0	-0.0305176	0	30.5176	-0.0305176	0.0305176	-0.0305176	0	0.0305176
13.4	2.99072	4.63867	4.69971	5.12695	4.21143	4.08936	4.27246	4.3335	4.02832	3.84521	4.15039	0	0	-0.0305176	-0.0610352	-0.0305176	0	-0.0305176	0.0305176	0	-0.0305176	0.0305176
13.5	2.86865	4.57764	4.76074	5.12695	4.27246	4.08936	4.27246	4.3335	3.96728	3.84521	4.08936	0.0305176	-0.0305176	-0.0610352	-0.0305176	-0.0305176	30.5176	-0.0610352	-0.0305176	-0.0610352	0	-0.0305176
13.6	2.86865	4.5166	4.76074	5.12695	4.27246	4.15039	4.27246	4.27246	3.90625	3.90625	4.08936	-0.0305176	-0.0610352	-0.0305176	-0.0305176	0	0	-0.0305176	-0.0610352	0	0.0305176	0
13.7	2.92969	4.45557	4.76074	5.06592	4.21143	4.21143	4.27246	4.27246	3.84521	3.78418	4.15039	-0.0610352	0	-0.0305176	-0.0610352	0	30.5176	-0.0610352	-0.0305176	-0.0305176	0.0305176	0
13.8	2.99072	4.5166	4.69971	5.06592	4.15039	4.21143	4.27246	4.27246	3.78418	3.72314	4.15039	-0.0305176	0.0305176	0.0305176	0	-0.0610352	-30.5176	-0.0610352	-0.0305176	0	0.0305176	0
13.9	2.99072	4.69971	4.69971	5.06592	4.15039	4.27246	4.21143	4.3335	3.78418	3.72314	4.15039	0	0	0.0915527	0	-0.0305176	0	-0.0305176	-0.0305176	0	-0.0305176	0
14	2.99072	4.82178	4.82178	4.94385	4.15039	4.27246	4.15039	4.39453	3.78418	3.72314	4.21143	0	0.0305176	0	-0.0305176	-0.0305176	0	0	-0.0305176	0	-0.0610352	0.0305176
14.1	2.92969	4.88281	4.94385	4.88281	4.21143	4.27246	4.08936	4.5166	3.84521	3.78418	4.21143	0.0305176	0	0	0	-0.0610352	30.5176	-0.0610352	-0.0305176	-0.0305176	0	0
14.2	2.92969	4.94385	4.94385	4.88281	4.08936	4.21143	4.08936	4.5166	3.90625	3.84521	4.21143	-0.0610352	0.0305176	0	0	0.0305176	0	-0.0610352	0.0305176	0	0	-0.0610352
14.3	2.92969	4.88281	4.94385	4.94385	4.15039	4.08936	4.02832	4.57764	3.96728	3.90625	4.21143	0	0	-0.0610352	-0.0305176	0	0	-0.0305176	-0.0610352	-0.0305176	0.0305176	-0.0915527
14.4	2.92969	4.88281	4.88281	4.88281	4.27246	3.96728	4.02832	4.5166	3.96728	3.90625	4.15039	-0.0305176	0	-0.0305176	-0.0305176	0	30.5176	-0.0305176	-0.0305176	0	0	-0.0305176
14.5	2.99072	4.88281	4.82178	4.88281	4.39453	3.90625	3.96728	4.39453	3.96728	3.90625	4.15039	-0.0610352	-0.0305176	0	0	-0.0305176	0	-0.0305176	0	-0.0915527	0.0305176	0.0305176
14.6	2.99072	4.88281	4.76074	4.88281	4.5166	3.96728	3.90625	4.27246	3.96728	3.84521	4.08936	-0.0610352	0	0.0305176	-0.0305176	-0.0305176	0	-0.0305176	-0.0305176	-0.0305176	0	0
14.7	3.05176	4.88281	4.82178	4.88281	4.57764	3.96728	4.02832	4.15039	3.90625	3.90625	4.08936	-0.0305176	-0.0305176	0	0	-0.0610352	-30.5176	0.0305176	-0.0305176	0	0	0
14.8	3.05176	4.82178	4.88281	4.88281	4.57764	3.96728	4.21143	4.08936	3.90625	3.90625	4.08936	0	-0.0305176	-0.0305176	0	0	0	-0.0610352	0.0305176	-0.0305176	0	-0.0610352
14.9	2.99072	4.88281	4.88281	4.94385	4.5166	3.96728	4.27246	4.08936	3.84521	3.96728	4.15039	-0.0305176	-0.0305176	0	-0.0305176	-0.0305176	30.5176	-0.0915527	0.0305176	0	0	-0.0305176
15	2.92969	4.94385	4.94385	5.00488	4.45557	3.96728	4.27246	4.15039	3.84521	3.96728	4.21143	0	0	0	0	-0.0305176	-30.5176	-0.0305176	0	0	-0.0610352	0.0305176
15.1	2.80762	4.88281	4.88281	5.00488	4.39453	4.02832	4.21143	4.21143	3.90625	3.84521	4.21143	-0.0305176	0	-0.0915527	-0.0305176	0.0610352	0	-0.0610352	0.0305176	-0.0305176	0	-0.0305176
[truncated: 4,849 more rows]

## Sheet: I271V-washout
﻿Time (ms)	Im_scaled (pA)	Im_scaled (pA)	Im_scaled (pA)	Im_scaled (pA)	Im_scaled (pA)	Im_scaled (pA)	Im_scaled (pA)	Im_scaled (pA)	Im_scaled (pA)	Im_scaled (pA)	Im_scaled (pA)	10_Vm (mV)	10_Vm (mV)	10_Vm (mV)	10_Vm (mV)	10_Vm (mV)	10_Vm (µV)	10_Vm (mV)	10_Vm (mV)	10_Vm (mV)	10_Vm (mV)	10_Vm (mV)
[truncated: 5,000 more rows]

[truncated: 1 more sheets: I-V]
