# Supplementary material for: Differential ion dehydration energetics explains selectivity in the non-canonical lysosomal K+ channel TMEM175
Source: eLife journal article supplement (doi:10.7554/elife.75122), 2022-05-05
Supplement: fig5-data1 [file raw-data-Figure5A-C.xlsx]

## Sheet: figureA_CsNa
Time (ms)	Im_scaled (nA)	Im_scaled (nA)	Im_scaled (nA)	Im_scaled (nA)	Im_scaled (nA)	Im_scaled (pA)	Im_scaled (nA)	Im_scaled (nA)	Im_scaled (nA)	Im_scaled (nA)	Im_scaled (nA)
0.1	171.509	175.781	181.885	178.528	178.223	178.528	180.969	184.021	181.885	179.749	178.833
0.2	172.119	175.171	182.19	178.223	178.833	178.833	180.664	184.021	182.19	180.054	178.833
0.3	172.424	174.866	182.19	178.528	179.443	179.138	180.359	183.716	182.495	180.054	178.528
0.4	172.424	174.866	181.885	178.833	179.749	179.443	180.054	183.716	182.495	179.749	178.528
0.5	172.119	175.171	181.58	178.528	179.749	179.749	179.749	183.411	182.19	179.138	178.528
0.6	171.814	175.781	181.274	178.223	179.443	180.054	179.443	183.411	181.885	179.138	178.833
0.7	171.814	176.392	181.274	177.612	179.749	179.749	179.443	183.411	180.969	179.138	179.138
0.8	171.814	177.002	181.274	177.307	180.054	179.443	179.138	183.411	180.359	178.833	179.443
0.9	171.814	177.307	181.274	177.307	180.664	179.138	179.749	184.021	180.359	178.528	179.443
1	171.814	177.002	180.664	177.917	180.969	179.443	180.359	184.326	180.359	178.528	179.138
1.1	172.424	177.002	180.359	178.528	180.969	179.443	180.664	184.326	180.359	178.528	179.138
1.2	172.729	176.697	180.054	179.138	180.359	179.138	180.969	184.631	180.359	178.833	179.138
1.3	172.424	176.697	179.443	179.443	179.443	178.833	180.664	184.631	180.359	178.833	179.443
1.4	172.119	177.002	179.443	179.443	179.443	177.917	180.359	184.326	180.664	178.528	180.054
1.5	171.814	177.307	179.443	179.138	179.443	177.612	179.749	183.411	180.664	178.528	180.664
1.6	171.814	177.612	179.749	179.138	180.054	177.612	179.749	183.105	180.359	178.528	180.664
1.7	171.509	177.612	180.054	179.443	180.359	177.612	180.359	183.105	180.359	178.528	180.664
1.8	171.814	177.002	180.359	180.664	180.359	178.528	180.359	182.8	180.359	178.833	180.359
1.9	172.119	176.697	180.664	181.58	180.359	178.833	180.359	182.495	180.664	178.833	180.359
2	172.119	176.392	180.664	182.495	180.054	179.138	180.359	182.19	180.969	179.138	180.664
2.1	172.424	176.697	180.969	182.495	179.749	179.138	180.054	182.19	181.274	179.138	180.969
2.2	173.035	177.002	181.274	181.885	179.443	178.528	180.359	182.495	180.664	179.443	180.969
2.3	173.645	176.697	181.58	180.969	179.443	177.917	180.664	182.8	179.749	179.749	180.359
2.4	173.95	176.392	181.885	180.359	179.443	177.307	180.969	182.8	179.443	179.749	179.443
2.5	173.95	176.392	182.19	180.664	179.443	177.307	181.58	182.495	179.443	180.054	178.833
2.6	173.95	176.697	181.885	180.969	179.443	177.917	182.19	182.19	179.443	179.749	178.833
2.7	173.95	177.002	181.58	181.274	179.138	178.528	182.8	182.19	179.138	179.443	178.833
2.8	173.34	177.612	181.274	180.664	179.138	179.138	183.411	182.19	179.138	179.443	179.443
2.9	172.729	177.917	181.58	180.054	179.749	179.138	183.411	182.19	179.443	179.749	180.359
3	172.729	177.917	181.885	179.443	180.054	179.443	183.105	182.495	179.749	180.054	180.969
3.1	172.729	177.612	181.885	179.138	180.664	179.749	183.105	182.495	180.054	180.664	180.969
3.2	172.729	177.002	181.885	179.138	180.969	180.054	183.105	182.8	180.054	180.969	180.359
3.3	172.424	176.392	182.19	179.443	180.969	180.359	183.105	183.105	180.054	181.274	179.443
3.4	172.424	176.392	182.495	179.749	180.359	180.359	183.105	183.105	180.359	180.969	178.528
3.5	172.424	176.392	183.105	180.054	180.054	180.359	183.105	182.8	180.664	180.664	178.223
3.6	172.424	176.392	182.8	179.749	180.054	180.054	183.411	182.8	181.274	180.054	178.223
3.7	172.119	176.392	182.19	180.054	180.054	179.443	183.716	182.495	181.58	179.138	179.138
3.8	172.119	176.086	181.885	180.054	180.054	178.833	183.411	182.495	180.969	178.528	180.664
3.9	171.814	175.781	181.274	180.054	179.749	178.528	183.105	182.19	180.054	178.528	181.274
4	170.898	176.086	180.664	179.749	179.749	178.223	182.8	182.495	179.749	179.443	181.274
4.1	170.288	176.392	180.054	179.443	180.054	177.917	182.19	182.19	180.054	180.054	180.969
4.2	169.983	176.697	179.749	178.528	180.359	177.612	181.885	182.19	180.359	180.054	180.664
4.3	170.898	176.697	179.749	177.917	180.664	177.307	181.885	182.8	180.664	179.749	180.359
4.4	171.814	176.086	179.749	177.917	180.969	177.002	182.19	183.716	180.969	179.443	180.664
4.5	172.424	175.781	180.054	178.223	180.664	177.002	182.495	184.021	180.969	179.749	180.969
4.6	172.729	175.781	180.359	178.833	180.054	177.307	182.495	183.716	181.274	180.054	180.969
4.7	172.424	175.476	180.664	179.443	179.443	178.223	182.8	183.411	181.274	180.054	181.274
4.8	172.424	175.781	180.359	179.443	179.443	178.833	182.8	183.105	181.274	180.359	181.58
4.9	171.814	175.781	179.443	179.443	179.749	178.528	182.495	183.105	181.58	180.664	181.58
5	171.204	176.086	178.528	180.359	180.664	178.223	181.885	183.105	181.885	180.664	181.885
5.1	170.593	175.781	178.223	181.274	181.274	177.917	181.274	182.8	182.19	180.969	182.19
5.2	170.593	175.171	178.528	181.885	181.885	177.612	181.274	182.495	182.495	180.969	181.885
5.3	170.288	175.171	178.833	181.58	181.885	177.917	181.274	182.19	182.19	181.274	181.58
5.4	170.593	175.476	179.138	180.969	181.885	177.917	181.58	182.495	182.19	180.969	181.58
5.5	171.204	176.392	178.528	180.054	181.58	178.223	182.19	182.495	181.885	180.664	181.885
5.6	172.119	177.307	177.917	179.443	181.58	178.223	183.105	181.885	182.19	180.359	182.495
5.7	172.424	177.917	177.612	178.528	181.274	178.223	183.716	181.274	182.19	180.664	182.495
5.8	172.424	178.223	177.612	177.917	180.969	178.223	184.021	180.664	182.495	180.969	181.885
5.9	172.119	178.223	177.612	177.612	180.969	178.528	183.411	180.664	182.495	181.58	180.969
6	171.509	177.917	177.307	177.917	181.274	178.528	183.105	180.969	182.495	181.885	180.054
6.1	171.204	177.612	177.002	178.833	181.58	178.833	182.8	181.274	182.19	181.58	179.443
6.2	170.898	177.307	177.002	179.138	181.885	179.138	183.105	181.58	181.58	180.969	178.528
6.3	170.898	177.002	177.002	179.138	181.885	180.054	183.105	181.58	180.969	180.664	177.917
6.4	171.204	177.307	177.612	179.138	181.885	180.664	182.8	181.58	180.664	180.359	178.223
6.5	171.814	177.612	177.917	179.443	181.58	180.969	182.495	181.58	180.664	180.054	178.833
6.6	172.424	177.307	178.528	179.443	180.969	180.664	182.19	181.58	180.664	180.054	179.749
6.7	172.729	176.697	179.749	179.138	180.664	180.054	181.885	181.885	180.969	179.749	180.359
6.8	172.729	176.086	180.664	179.138	180.664	179.138	181.58	181.885	180.969	179.443	180.359
6.9	172.424	175.781	181.58	179.138	180.969	178.528	181.274	181.885	180.664	179.443	179.749
7	172.119	176.086	181.274	179.138	180.969	177.917	181.274	181.58	180.054	179.749	179.138
7.1	171.509	176.697	180.969	179.443	180.664	177.002	181.274	181.274	179.443	180.054	179.138
7.2	171.509	177.612	180.969	179.443	180.054	176.086	181.58	181.274	179.443	180.054	180.359
7.3	171.814	177.917	180.664	179.749	179.443	175.476	181.274	181.274	179.443	180.054	181.58
7.4	172.424	177.612	180.054	180.054	179.138	175.476	181.274	181.58	179.443	180.054	182.19
7.5	172.424	177.307	179.443	180.359	179.138	176.086	181.274	181.885	180.054	179.749	182.19
7.6	172.424	176.697	178.833	180.054	179.138	177.002	181.58	182.495	180.359	179.443	181.885
7.7	172.729	176.086	178.833	179.443	179.138	177.612	182.19	183.411	180.969	179.138	181.274
7.8	173.035	175.781	178.833	178.528	179.443	178.223	182.495	184.021	181.58	178.833	180.969
7.9	173.035	175.781	178.833	178.223	179.443	178.833	182.495	184.326	182.19	178.528	180.969
8	172.729	175.781	178.833	178.223	179.138	179.443	182.19	184.326	182.19	178.528	180.969
8.1	172.424	175.781	178.833	178.528	179.138	179.443	181.885	183.716	182.19	178.833	180.664
8.2	172.424	175.476	179.138	179.138	178.833	179.138	182.19	182.495	182.19	179.138	180.359
8.3	172.424	175.476	180.054	179.443	179.138	178.833	182.495	181.885	182.19	179.138	180.359
8.4	172.729	175.781	180.969	180.054	180.359	178.833	182.8	181.885	181.885	178.528	180.054
8.5	172.729	175.781	181.885	180.359	181.274	178.833	183.105	181.885	181.58	178.223	179.749
8.6	173.035	176.086	182.495	180.969	182.19	179.443	183.411	182.19	181.58	177.917	179.443
8.7	173.34	176.086	183.105	181.274	182.495	179.749	183.716	182.19	181.274	177.612	179.443
8.8	173.34	175.781	183.105	181.58	181.58	180.054	184.021	182.495	180.664	177.612	180.054
8.9	173.645	175.476	182.8	181.274	180.664	179.749	184.021	182.8	180.359	178.223	180.969
9	173.645	175.781	182.495	181.58	180.054	179.138	184.326	183.105	179.749	179.138	182.495
9.1	173.645	176.086	182.495	181.58	180.359	178.528	184.326	183.105	180.054	179.443	183.411
9.2	173.95	176.392	183.105	181.58	180.969	178.223	184.021	182.8	180.359	179.443	183.105
9.3	174.255	176.392	183.716	181.274	181.58	177.612	183.716	182.495	180.359	179.749	182.19
9.4	174.255	176.392	183.411	180.969	181.885	177.612	183.411	182.495	180.054	180.054	181.58
9.5	174.255	176.392	182.8	180.664	182.19	177.917	183.105	182.8	179.443	180.359	180.969
9.6	173.95	176.392	182.19	180.969	182.495	178.528	182.495	183.105	179.138	180.664	180.664
9.7	173.34	177.002	181.885	181.274	182.495	178.833	181.885	183.411	178.528	180.664	180.359
9.8	173.035	177.002	181.885	181.58	182.19	178.528	181.58	183.716	177.917	180.664	179.749
9.9	172.424	177.002	181.58	182.19	181.274	178.528	181.274	183.411	177.612	180.359	179.443
10	172.119	176.392	181.274	182.495	180.664	179.138	180.969	183.105	177.612	180.054	179.138
10.1	171.814	176.086	181.58	182.495	180.054	179.443	180.969	182.8	177.612	180.054	179.443
10.2	171.814	176.392	181.885	181.885	180.054	180.054	180.969	182.495	177.307	179.749	180.054
10.3	172.424	176.697	182.19	181.274	180.054	180.054	180.969	181.885	176.697	179.443	180.359
10.4	172.729	177.002	181.885	180.664	180.054	179.749	181.274	181.885	176.392	178.833	180.359
10.5	173.34	177.307	181.274	180.054	180.664	179.443	181.274	181.58	176.697	177.917	180.664
10.6	173.34	177.612	180.969	179.749	181.274	179.138	181.274	181.58	177.612	177.002	180.969
10.7	173.035	177.917	180.664	179.749	181.58	179.138	180.969	181.885	178.528	176.697	181.274
10.8	172.119	177.612	180.969	179.443	182.19	179.138	180.969	181.885	179.138	177.307	181.58
10.9	171.204	177.002	180.969	179.749	181.885	179.749	180.969	181.885	179.749	177.917	181.58
11	170.898	176.392	180.054	180.054	181.885	180.054	180.969	181.885	180.664	178.223	181.274
11.1	170.898	176.086	179.138	180.969	181.274	179.749	180.664	182.19	181.274	178.528	180.969
11.2	170.898	176.086	178.528	181.58	180.969	179.443	180.359	182.495	181.274	178.528	180.664
11.3	171.204	176.392	178.833	182.19	180.359	178.833	180.054	182.19	180.664	178.833	180.054
11.4	171.509	176.697	179.443	182.19	179.749	178.833	180.054	181.885	179.749	179.138	180.054
11.5	171.814	176.697	180.359	181.58	179.443	179.138	180.054	181.58	179.443	179.138	180.664
11.6	171.814	176.086	180.664	180.969	179.749	179.443	180.664	181.58	179.749	178.833	181.274
11.7	172.119	176.086	180.359	180.969	180.359	179.443	181.274	181.885	179.749	179.138	182.19
11.8	172.119	176.697	180.359	181.274	180.969	179.138	182.19	181.58	179.749	179.749	181.885
11.9	172.424	176.697	180.359	181.885	181.58	178.528	182.495	180.969	179.749	180.359	181.274
12	172.729	176.392	180.359	181.885	181.58	178.223	182.495	180.054	180.359	180.359	180.664
12.1	173.035	176.086	180.054	181.885	181.885	178.223	182.19	179.749	180.664	179.749	180.359
12.2	173.035	176.392	179.443	181.885	181.885	178.528	182.19	180.054	180.054	178.833	180.359
12.3	173.035	177.307	179.443	181.885	181.58	178.833	182.495	180.664	179.443	179.138	180.359
12.4	173.035	177.917	179.443	181.274	180.969	179.138	183.411	180.664	179.443	179.749	180.664
12.5	173.035	178.833	179.443	180.969	180.664	179.749	183.411	180.664	179.749	180.054	180.969
12.6	172.729	178.833	179.443	180.359	180.359	180.664	183.105	180.664	180.054	180.054	181.274
12.7	172.424	178.223	179.749	180.359	180.359	180.969	182.19	180.969	180.664	179.749	181.274
12.8	172.424	177.307	180.359	180.359	180.359	180.664	181.58	181.58	181.274	179.138	181.274
12.9	172.729	176.392	180.969	180.664	180.359	180.054	181.274	182.19	181.274	178.833	181.274
13	172.729	175.476	181.274	180.664	180.664	179.749	181.274	182.495	181.274	179.138	180.969
13.1	173.035	175.476	181.58	180.359	180.969	179.443	181.274	182.495	180.969	179.443	180.969
13.2	173.035	176.392	181.58	180.359	181.58	179.138	181.885	182.495	180.664	179.749	180.969
13.3	173.34	177.612	180.664	180.664	182.19	179.138	181.885	182.495	180.664	180.054	180.664
13.4	173.95	178.528	179.749	181.274	182.19	179.443	181.58	182.19	180.359	179.749	180.664
13.5	174.866	178.833	179.138	181.58	181.885	179.749	181.58	182.19	180.054	179.749	180.969
13.6	174.866	178.528	178.528	181.885	181.885	180.054	181.274	182.19	179.443	179.749	180.969
13.7	173.645	177.917	178.528	181.885	182.495	180.054	181.274	181.885	179.138	179.749	181.274
13.8	171.814	177.917	178.833	182.495	182.8	179.443	180.969	181.885	179.138	179.443	181.274
13.9	170.593	177.917	179.443	182.8	182.8	179.138	180.969	180.969	179.138	179.138	180.969
14	169.678	177.307	179.749	182.8	182.495	179.443	180.969	180.359	178.833	179.138	180.664
14.1	169.678	176.392	180.054	182.495	181.885	179.749	180.664	179.749	178.223	179.443	180.969
14.2	170.288	175.171	180.054	182.19	181.274	179.749	180.359	180.054	177.917	180.054	181.58
14.3	171.204	174.561	180.054	182.19	180.969	179.749	180.359	180.359	177.307	180.664	181.885
14.4	171.509	174.561	180.359	182.19	181.274	179.749	180.054	180.664	177.307	180.359	182.495
14.5	171.509	174.255	180.969	182.495	181.58	179.443	179.749	180.969	177.307	180.359	182.495
14.6	171.509	174.255	180.969	182.8	181.885	179.443	179.443	180.664	177.307	180.359	182.495
14.7	171.509	173.95	180.664	182.19	181.58	179.138	179.443	180.664	177.917	180.664	182.495
14.8	171.814	173.95	180.054	181.58	181.274	179.138	179.749	180.664	177.917	180.969	182.19
14.9	171.814	174.866	180.054	181.274	180.969	179.443	180.054	181.274	177.917	181.274	181.885
15	171.204	175.781	180.359	181.274	180.664	179.443	180.359	181.58	177.917	181.58	181.274
15.1	170.898	176.697	180.969	181.885	180.359	179.443	180.054	181.58	177.612	181.885	181.274
15.2	170.898	177.307	181.885	182.19	180.054	180.054	180.359	181.274	177.917	181.885	181.274
15.3	170.898	177.307	182.495	182.19	179.443	180.359	180.359	180.664	178.223	181.885	181.274
15.4	171.204	177.307	183.105	181.885	178.833	180.359	180.359	180.359	178.223	182.19	180.664
15.5	171.509	177.307	183.105	181.274	178.223	180.359	180.054	180.054	177.917	181.885	179.749
15.6	172.424	176.697	182.495	180.969	178.223	180.054	179.443	179.443	177.612	181.274	179.443
15.7	173.035	176.392	181.58	181.274	178.528	179.749	178.833	179.138	177.612	180.359	179.443
15.8	173.645	175.781	181.274	181.58	178.528	179.749	178.223	179.138	177.612	180.054	179.443
15.9	174.255	175.781	181.58	182.19	178.833	179.749	177.612	179.749	177.917	180.054	179.443
16	173.95	175.476	182.19	182.495	179.749	180.054	177.612	180.359	178.223	180.359	179.749
16.1	173.34	175.476	182.19	182.495	180.054	180.054	177.917	181.274	178.223	180.664	179.749
16.2	172.729	175.781	181.58	182.495	180.359	179.749	178.528	182.19	177.917	180.969	180.359
16.3	172.729	175.781	180.969	182.19	180.359	179.443	178.833	182.19	177.612	181.274	180.359
16.4	173.035	176.086	180.359	181.885	180.359	179.138	179.138	181.58	177.612	180.969	180.664
16.5	173.95	176.086	180.664	181.274	180.359	178.833	178.833	181.274	177.917	181.274	180.359
16.6	174.866	176.086	180.969	180.969	180.054	178.528	178.528	181.274	178.223	182.19	180.359
16.7	175.476	176.086	180.664	180.969	180.054	178.223	178.223	181.58	178.528	183.105	180.359
16.8	175.476	175.781	180.054	181.274	179.749	178.223	178.223	182.19	178.528	183.411	180.359
16.9	175.171	175.781	179.749	181.885	179.443	178.528	178.528	182.8	178.223	183.411	180.359
17	174.561	176.392	179.443	182.19	179.443	178.528	179.138	183.411	177.612	183.105	180.359
17.1	173.95	177.002	179.138	181.885	179.749	178.223	179.749	183.411	177.307	182.19	180.664
17.2	173.035	177.612	179.138	181.274	180.359	177.612	179.749	182.8	177.612	181.58	181.274
17.3	172.729	177.307	179.443	180.969	180.664	177.307	179.443	182.19	177.917	180.664	181.58
17.4	172.424	177.002	179.443	180.359	180.969	176.697	179.138	181.885	178.528	180.054	181.58
17.5	172.119	176.697	179.138	179.749	181.274	176.392	179.443	182.19	178.833	180.054	181.274
17.6	172.119	177.002	178.833	179.138	181.58	176.392	180.054	182.495	179.749	180.359	181.274
17.7	172.424	177.307	178.833	178.833	181.885	176.697	180.664	182.8	180.664	180.969	181.58
17.8	173.035	177.612	178.833	178.833	182.19	177.307	180.664	182.8	181.58	181.274	181.885
17.9	173.035	178.223	178.833	178.833	182.495	177.917	180.969	182.495	182.19	180.969	181.885
18	173.035	178.833	178.833	179.138	182.495	178.223	180.969	182.19	182.19	180.359	181.274
18.1	173.035	178.528	179.138	179.443	182.19	177.917	181.274	182.19	181.58	180.359	180.664
18.2	173.34	178.223	179.443	179.749	181.274	177.307	181.274	181.885	181.274	180.359	180.664
18.3	173.035	178.223	179.749	180.054	180.054	177.002	180.969	181.58	181.274	180.664	180.664
18.4	172.424	178.223	180.054	180.054	179.138	177.002	180.969	181.274	181.274	181.274	180.969
18.5	172.119	178.223	180.359	179.749	178.528	177.002	180.969	180.969	181.274	181.885	180.664
18.6	171.814	177.917	180.664	179.749	178.223	177.002	180.664	180.664	180.969	182.19	180.054
18.7	171.509	177.917	180.664	179.443	177.917	177.307	180.054	180.054	180.969	182.495	179.749
18.8	171.509	177.612	180.359	179.443	177.612	177.612	180.054	180.359	180.664	182.8	179.749
18.9	171.509	177.307	179.749	179.443	177.612	177.612	180.359	180.969	179.749	182.8	179.443
19	171.814	177.612	179.443	179.749	177.612	177.612	180.359	181.58	179.443	182.8	179.443
19.1	172.424	177.917	179.138	180.054	177.917	177.917	180.664	181.885	178.833	182.8	179.138
19.2	172.729	178.528	178.833	180.359	178.223	177.612	180.359	181.885	178.833	182.8	179.443
19.3	172.729	179.138	178.833	180.969	178.833	177.612	180.054	181.58	178.833	182.8	180.054
19.4	172.729	179.443	178.528	181.274	178.833	177.002	179.749	180.969	179.443	183.105	180.664
19.5	172.424	179.138	178.223	180.969	178.833	177.002	179.749	180.054	179.749	183.105	181.274
19.6	172.424	178.528	178.223	180.664	178.833	176.697	179.443	180.054	180.054	182.8	181.274
19.7	173.035	178.528	177.612	180.664	178.833	176.697	179.138	180.664	180.359	181.885	181.274
19.8	173.645	178.528	177.307	180.664	178.833	176.697	179.443	181.274	180.359	181.58	181.274
19.9	174.255	178.833	177.002	181.274	178.833	177.002	180.054	181.58	180.054	181.58	180.969
20	174.866	179.138	176.697	181.885	178.833	177.612	180.969	181.58	180.054	182.19	180.969
20.1	174.866	179.138	177.002	182.19	178.833	177.917	181.58	181.274	180.054	182.8	180.664
20.2	174.561	178.833	177.612	181.58	179.443	177.917	181.885	181.274	179.749	183.105	180.359
20.3	173.645	178.833	177.917	181.274	179.749	177.002	182.19	181.274	179.749	183.105	180.054
20.4	173.34	178.833	177.917	181.274	180.054	176.086	182.19	180.969	179.443	182.19	180.359
20.5	172.424	179.138	177.917	181.274	180.359	175.476	181.885	180.359	179.749	181.58	181.274
20.6	172.119	179.138	178.223	181.58	180.054	175.476	181.274	179.749	179.443	181.274	181.885
20.7	171.509	179.443	178.528	181.885	180.054	176.086	180.359	179.138	179.443	181.274	181.885
20.8	171.204	179.749	178.528	182.495	180.054	176.697	180.054	179.138	179.749	180.969	181.885
20.9	171.204	179.443	177.917	183.105	180.054	177.612	179.138	179.443	179.749	180.664	181.885
21	171.814	178.833	177.917	183.716	180.359	177.917	179.443	180.054	179.749	180.054	181.885
21.1	172.424	178.833	177.612	183.411	180.359	177.307	180.054	180.969	180.054	180.054	182.19
21.2	172.729	178.833	177.612	182.495	180.664	177.002	180.664	181.58	180.359	180.969	181.885
21.3	172.729	179.138	177.612	181.274	180.664	177.612	180.969	182.19	179.749	181.885	181.58
21.4	172.729	179.443	177.917	180.054	180.969	178.833	180.359	182.495	179.138	182.495	180.969
21.5	172.729	179.749	178.223	179.138	181.58	179.138	180.359	182.495	178.528	182.8	180.054
21.6	172.729	179.749	177.917	178.528	182.495	178.833	180.359	181.58	178.528	182.495	179.443
21.7	173.035	179.749	177.612	179.138	182.495	178.223	180.359	180.664	178.833	182.19	178.833
21.8	172.729	179.443	178.223	179.749	182.495	177.917	180.664	180.054	178.833	181.885	179.138
21.9	172.119	179.749	178.833	180.359	181.885	178.223	180.359	179.749	178.528	181.58	179.749
22	171.509	180.359	179.443	180.664	181.58	178.833	180.054	179.749	178.223	181.274	180.359
22.1	171.204	180.969	179.749	181.274	181.274	179.443	180.054	179.443	178.223	181.58	181.274
22.2	171.814	180.969	179.749	181.274	180.359	179.749	180.359	179.138	178.528	181.58	181.58
22.3	172.424	180.969	179.443	181.274	180.054	180.054	180.359	179.138	179.138	181.58	181.58
22.4	172.729	180.664	179.138	181.274	180.054	180.054	180.664	179.443	179.749	181.885	181.58
22.5	172.729	180.359	179.138	181.58	180.359	180.359	180.969	180.359	180.359	182.19	181.58
22.6	172.729	180.359	178.833	181.885	180.359	180.054	180.969	180.664	180.359	182.495	181.58
22.7	172.424	180.054	178.833	181.885	180.359	179.138	180.664	180.664	180.359	182.19	181.58
22.8	172.119	179.443	178.223	181.885	180.359	178.833	179.749	180.664	179.443	181.885	181.58
22.9	172.119	178.833	177.307	181.885	180.359	178.833	179.443	180.359	178.528	181.58	181.58
23	172.424	178.223	176.392	181.885	180.359	179.443	179.443	180.359	177.917	181.885	181.885
23.1	172.424	178.223	175.476	181.885	180.664	180.054	179.443	180.359	178.223	182.19	182.495
23.2	172.119	177.917	175.476	181.885	180.664	180.359	179.138	180.664	178.833	181.885	183.411
23.3	171.814	177.307	175.781	181.274	180.359	180.359	178.833	180.969	179.749	180.969	183.716
23.4	171.509	176.697	176.392	180.664	180.359	180.054	178.528	181.274	180.359	180.054	183.411
23.5	171.509	176.086	176.697	180.359	180.054	180.054	178.528	181.274	180.359	179.749	183.411
23.6	171.509	175.781	177.612	180.664	179.749	179.749	178.528	181.58	179.749	179.749	183.105
23.7	171.509	175.781	178.833	180.664	179.749	179.138	178.223	181.58	179.138	179.749	183.105
23.8	171.814	175.781	180.054	180.664	180.359	178.528	178.528	181.58	179.138	180.054	183.105
23.9	172.119	176.086	180.359	180.664	180.969	178.223	178.833	181.58	179.749	180.359	183.411
24	172.424	176.697	180.054	180.359	181.58	178.223	179.138	181.274	180.664	180.359	183.716
24.1	172.424	177.307	179.443	180.359	181.58	178.223	179.138	180.969	181.274	180.359	183.716
24.2	172.424	177.307	179.138	180.054	181.885	178.528	179.138	180.359	180.969	180.359	183.411
24.3	172.119	177.002	179.138	180.054	181.885	179.138	179.138	179.749	180.359	180.359	182.8
24.4	171.814	177.002	179.443	180.054	181.274	179.749	179.138	179.443	179.443	180.054	182.495
24.5	171.814	177.307	179.749	179.749	180.969	180.359	179.138	179.443	178.528	179.749	182.19
24.6	172.119	177.307	179.749	180.054	180.969	180.664	179.443	179.749	178.223	179.138	182.495
24.7	172.729	177.002	179.749	180.054	181.58	180.664	179.749	180.054	178.223	179.138	183.105
24.8	173.34	176.697	179.749	179.443	182.19	180.054	179.749	180.359	178.833	179.138	184.021
24.9	173.95	176.697	179.443	178.833	182.19	179.138	179.443	180.969	179.443	179.138	184.326
25	173.95	177.002	179.138	178.223	181.885	177.917	179.749	180.969	179.749	178.833	184.631
25.1	173.95	177.612	179.138	178.223	181.885	177.002	180.054	180.359	180.054	178.528	184.326
25.2	173.035	177.917	179.138	178.528	181.885	176.392	180.664	180.054	180.054	178.223	184.021
25.3	172.424	177.612	179.138	178.833	182.19	176.392	180.359	180.054	179.749	177.612	183.716
25.4	171.814	177.307	179.749	179.443	182.495	176.392	180.054	180.664	179.749	177.917	183.716
25.5	171.814	177.612	180.359	180.359	182.495	177.002	179.749	181.274	180.054	178.223	183.716
25.6	172.119	177.917	180.664	181.274	182.8	177.307	179.138	181.885	180.664	178.833	183.716
25.7	172.119	178.528	180.969	181.274	182.19	177.002	178.833	182.8	180.664	178.833	183.716
25.8	172.119	179.138	181.274	180.359	181.58	177.002	179.138	183.105	180.664	178.528	183.105
25.9	172.119	179.138	181.58	179.443	180.969	177.612	179.443	182.8	180.969	177.917	182.495
26	172.424	179.138	181.58	178.528	180.664	178.528	179.443	182.495	181.274	177.612	181.885
26.1	172.729	179.443	180.664	177.917	180.969	179.138	179.138	181.885	181.274	177.002	181.58
26.2	172.729	179.443	180.054	177.612	180.969	179.443	179.443	181.58	181.274	177.307	180.969
26.3	172.729	179.749	179.749	177.917	180.664	179.443	179.138	180.969	181.274	177.612	180.664
26.4	173.035	179.749	180.054	178.223	180.359	179.443	179.443	180.664	181.274	177.917	180.664
26.5	172.729	179.443	180.054	178.528	179.749	179.443	179.749	180.664	181.274	178.223	181.274
26.6	172.729	179.443	180.054	178.528	179.138	179.749	180.054	180.664	180.969	178.528	182.19
26.7	172.729	179.138	180.054	178.528	178.833	179.443	180.359	180.969	180.359	178.528	182.495
26.8	173.035	179.138	180.664	178.223	178.528	179.749	180.664	180.969	179.749	178.223	182.495
26.9	173.035	179.138	181.274	178.223	179.443	180.054	180.664	180.969	179.138	177.917	181.885
27	173.035	179.138	182.19	178.528	180.054	180.359	180.969	181.274	179.138	177.612	181.274
27.1	173.035	179.138	183.105	178.528	180.054	180.359	180.664	181.274	179.138	178.223	180.664
27.2	173.34	179.138	183.716	178.528	179.749	180.359	180.664	181.274	179.443	179.138	180.664
27.3	173.645	179.138	184.021	178.528	179.138	180.664	180.054	181.274	180.054	179.749	180.969
27.4	173.645	179.138	184.021	178.528	178.528	180.969	179.749	181.58	180.664	180.054	180.969
27.5	173.645	179.443	183.411	178.833	178.223	180.664	179.138	182.19	180.969	180.359	180.664
27.6	173.95	179.749	182.495	178.833	178.223	180.359	178.833	182.19	180.969	180.054	180.359
27.7	173.95	180.054	181.58	178.528	178.528	180.054	179.443	182.19	180.359	179.749	180.664
27.8	173.95	180.359	181.274	178.528	178.528	179.443	180.054	182.19	179.443	179.443	180.664
27.9	173.645	180.969	180.969	178.528	178.528	179.138	180.664	181.885	179.138	178.833	180.664
28	173.34	181.274	180.664	178.833	178.528	178.833	181.274	181.58	178.833	178.528	180.664
28.1	173.34	181.58	180.664	179.443	178.223	178.223	181.274	181.274	179.138	177.917	180.664
28.2	172.729	181.58	180.664	179.443	178.223	177.612	180.664	181.274	179.138	177.612	181.274
28.3	172.119	180.969	180.969	178.833	178.223	177.002	180.664	181.58	179.138	177.917	182.19
28.4	171.509	180.359	181.58	178.528	178.833	176.697	180.664	182.19	178.833	178.223	183.105
28.5	170.898	179.749	181.885	178.528	179.138	176.697	180.664	182.495	178.833	179.443	183.411
28.6	170.593	179.443	182.495	179.138	179.138	176.697	180.664	183.105	179.443	180.664	183.105
28.7	170.288	179.443	182.8	179.443	178.833	177.002	180.664	183.411	180.054	180.969	182.8
28.8	170.288	179.443	182.495	179.138	178.833	177.307	180.664	184.021	180.664	180.969	182.495
28.9	170.593	179.443	182.19	178.528	178.833	177.612	180.664	184.631	180.359	180.664	182.19
29	170.898	179.443	181.885	178.528	178.528	178.223	180.664	184.631	179.749	180.359	181.58
29.1	170.898	179.138	181.58	178.833	178.528	178.528	180.969	184.021	179.443	180.054	180.969
29.2	171.204	179.443	181.58	179.749	178.528	179.138	180.969	183.411	179.138	179.749	180.054
29.3	171.204	179.443	181.58	180.664	178.223	179.443	180.969	182.8	179.138	179.443	179.443
29.4	171.204	179.749	181.274	181.274	178.528	179.138	180.359	183.105	179.443	179.443	179.443
29.5	171.509	179.749	181.274	181.58	178.223	178.528	180.054	183.105	180.054	179.443	179.443
29.6	171.509	180.054	181.274	181.885	177.612	178.223	179.749	183.105	180.359	179.443	180.054
29.7	171.814	180.054	181.58	181.58	176.697	178.223	180.054	183.105	180.664	179.138	180.664
29.8	172.424	180.054	181.885	180.969	176.697	178.223	180.054	183.105	180.664	178.833	181.274
29.9	172.729	180.054	181.885	180.664	177.307	178.223	180.359	183.105	180.359	178.223	181.58
30	172.729	180.054	180.969	180.359	178.223	178.223	180.664	183.105	179.749	177.917	181.885
30.1	173.035	179.138	180.054	180.664	178.833	178.223	180.664	183.105	179.443	177.612	182.19
30.2	173.035	178.528	179.749	181.274	179.138	178.223	180.359	183.105	179.749	177.307	181.885
30.3	172.424	178.223	179.443	181.58	179.443	178.223	180.054	183.105	180.664	177.307	181.885
30.4	171.509	178.528	179.443	182.19	179.749	178.223	179.749	183.105	181.885	177.002	182.19
30.5	170.898	178.833	179.138	182.495	179.749	177.917	179.138	182.8	182.495	177.002	182.495
30.6	170.288	178.528	178.833	182.495	179.443	177.917	179.138	182.495	181.885	177.307	182.495
30.7	170.898	178.223	178.833	182.495	178.833	177.307	179.749	181.885	181.274	177.612	182.495
30.8	171.814	178.223	178.833	182.19	178.528	176.697	180.359	181.274	180.664	177.917	182.19
30.9	172.729	178.528	179.138	181.885	178.223	176.392	180.969	180.969	180.359	178.528	181.885
31	173.34	178.528	179.443	181.274	178.223	176.392	180.969	180.359	180.969	179.138	181.885
31.1	173.645	178.223	179.443	180.664	178.528	176.697	180.969	179.749	181.58	179.138	181.58
31.2	173.34	178.223	179.443	180.054	178.223	176.697	180.969	179.443	182.19	178.833	181.885
31.3	172.729	177.917	179.138	179.138	177.917	176.697	181.274	179.749	182.8	177.917	182.19
31.4	172.119	177.917	178.528	178.528	177.307	176.697	181.274	179.749	182.8	177.002	182.495
31.5	172.119	177.612	178.223	178.223	177.307	177.002	181.58	180.054	182.19	177.002	182.19
31.6	172.729	177.612	177.917	178.833	177.612	177.002	181.885	180.054	181.274	177.002	182.19
31.7	173.34	177.612	177.917	179.443	177.917	177.002	182.495	180.054	180.664	177.307	182.19
31.8	174.561	177.917	177.917	180.054	178.833	177.307	182.8	180.054	180.359	177.612	182.495
31.9	175.476	177.917	178.223	180.054	179.443	177.612	182.495	180.054	179.749	177.917	182.495
32	176.086	177.612	178.528	180.359	179.749	177.917	182.19	180.359	179.443	177.917	182.19
32.1	176.392	177.002	178.223	180.664	179.749	178.223	181.58	180.359	179.443	178.528	181.58
32.2	176.086	176.392	178.528	180.664	179.443	178.223	181.274	180.359	179.443	179.138	181.274
32.3	176.086	175.781	178.833	180.664	178.833	177.917	181.274	180.664	180.054	179.138	180.664
32.4	176.086	175.171	179.443	180.359	178.528	177.612	181.274	180.969	180.359	179.138	180.359
32.5	176.086	175.476	180.054	180.054	177.917	177.002	180.969	181.58	180.359	179.138	180.359
32.6	175.476	176.086	180.054	180.054	177.612	176.697	180.359	181.58	179.749	178.528	180.664
32.7	175.171	176.697	180.054	180.359	177.917	176.392	179.749	181.58	178.833	178.223	180.969
32.8	174.561	177.307	180.054	180.969	177.917	176.086	179.749	181.274	178.833	177.612	180.969
32.9	173.95	177.307	180.054	181.58	177.917	176.086	179.749	180.969	179.138	177.307	180.969
33	173.95	177.002	179.749	181.885	177.917	176.086	180.359	180.664	179.749	177.307	180.664
33.1	174.255	176.697	179.138	181.274	177.917	176.086	180.664	180.664	180.359	177.612	180.664
33.2	174.255	176.086	178.528	180.359	177.612	176.392	180.969	180.664	180.054	177.612	180.664
33.3	174.255	175.476	178.528	179.749	177.307	177.002	180.664	180.359	180.054	177.917	180.969
33.4	174.255	175.171	178.528	179.443	177.307	177.612	179.749	180.054	179.749	177.917	181.274
33.5	173.95	174.561	178.833	179.443	177.612	178.528	179.138	179.749	179.443	178.528	181.274
33.6	173.645	174.255	179.443	179.749	177.917	179.443	178.223	179.443	178.833	178.833	181.274
33.7	173.035	174.561	179.443	180.359	178.528	179.443	177.612	179.443	178.528	178.833	180.969
33.8	172.424	175.171	179.749	180.664	179.138	179.138	177.307	179.443	178.528	178.528	180.969
33.9	171.814	175.781	179.749	180.664	179.749	179.138	177.612	179.443	178.223	178.528	180.664
34	171.204	176.392	180.054	180.359	180.054	179.443	178.223	179.443	177.612	178.528	180.664
34.1	171.509	177.002	180.054	180.359	180.054	179.749	178.833	179.443	177.612	178.528	180.969
34.2	172.424	177.612	180.054	180.664	180.054	179.443	178.833	179.749	177.917	177.917	181.274
34.3	173.035	177.917	180.359	181.274	180.054	178.528	178.833	180.054	178.223	177.917	181.58
34.4	173.035	177.917	180.664	181.885	179.749	178.223	178.833	180.664	178.223	178.223	181.885
34.5	172.729	177.612	181.274	181.885	179.749	177.917	179.138	180.664	178.223	178.528	181.58
34.6	173.035	177.612	181.58	181.274	179.749	177.917	179.443	180.664	178.223	179.138	181.274
34.7	173.035	177.307	181.885	180.664	179.443	177.612	179.443	180.664	178.223	179.443	181.58
34.8	172.729	177.002	181.885	180.359	179.443	177.002	179.443	181.274	178.528	179.749	181.885
34.9	173.035	176.697	181.58	180.359	179.443	176.392	179.138	181.58	178.833	180.054	181.885
35	173.035	176.392	181.274	180.359	179.443	176.392	178.528	181.58	179.138	179.749	181.58
35.1	173.645	176.392	180.969	180.359	179.443	176.086	178.528	181.274	179.138	179.443	181.274
35.2	174.255	176.392	180.969	180.359	179.749	176.086	178.528	181.58	179.138	179.443	180.969
35.3	174.866	177.002	180.969	180.359	180.359	175.781	178.833	181.885	178.833	179.443	180.664
35.4	175.476	177.612	181.58	180.359	180.664	175.781	179.138	182.19	178.528	179.749	180.969
35.5	175.476	178.223	182.19	180.359	180.359	176.086	179.443	182.495	178.833	179.443	181.274
35.6	175.476	178.528	182.495	180.359	179.749	176.697	179.749	182.495	179.443	178.833	181.58
35.7	175.171	178.833	182.19	180.664	179.138	177.307	180.359	182.495	179.749	178.528	181.58
35.8	174.255	178.833	181.885	180.359	178.833	177.307	180.664	181.885	179.749	178.223	181.58
35.9	173.34	178.833	181.274	180.054	178.833	177.002	180.664	180.969	178.833	178.528	181.274
36	172.729	178.833	181.274	179.138	179.138	177.002	180.359	180.054	178.528	178.833	181.274
36.1	172.424	178.223	180.969	178.528	179.138	177.612	180.054	179.443	178.223	179.138	181.885
36.2	172.424	178.223	181.274	178.223	179.443	178.223	180.054	179.443	178.223	179.138	182.495
36.3	172.424	178.223	181.885	177.917	179.443	178.528	180.359	180.054	178.833	178.833	182.8
36.4	172.119	178.223	181.885	177.917	179.749	178.528	180.664	180.359	179.443	178.528	182.495
36.5	171.509	178.223	181.885	177.917	180.359	178.223	180.969	180.969	179.749	178.223	182.19
36.6	171.204	178.528	181.58	177.917	180.054	178.223	180.664	180.969	179.749	177.917	181.885
36.7	170.898	179.138	181.58	178.223	179.138	178.528	180.054	180.664	179.443	177.612	181.58
36.8	171.509	179.749	181.274	178.833	178.528	179.138	179.443	180.664	179.443	177.002	181.58
36.9	172.424	180.054	180.969	179.138	178.528	179.138	179.138	180.664	179.443	176.392	180.969
37	173.645	180.054	180.664	179.138	178.528	179.138	178.528	180.664	179.443	176.392	180.359
37.1	174.255	179.749	180.664	178.833	178.833	179.138	178.223	180.664	179.443	176.392	179.749
37.2	174.561	179.138	180.664	178.833	179.443	179.138	178.223	180.359	179.138	177.307	179.443
37.3	174.561	178.528	181.274	179.138	179.749	179.138	178.223	180.054	178.833	178.223	179.138
37.4	174.255	178.223	181.885	180.054	179.749	179.138	178.223	179.749	179.138	178.833	179.443
37.5	174.255	178.528	182.19	180.664	179.749	179.138	178.223	179.443	180.054	179.443	180.054
37.6	174.255	178.833	181.885	180.969	180.054	178.833	177.917	180.359	180.664	179.749	180.359
37.7	174.561	179.138	181.58	180.969	180.054	178.528	177.612	180.664	180.664	179.749	180.359
37.8	173.95	179.443	180.664	180.969	180.054	177.917	177.917	180.664	180.359	180.054	179.749
37.9	173.645	179.138	180.054	180.969	179.443	177.612	177.917	180.664	180.664	179.749	179.443
38	173.645	178.833	179.749	181.274	179.443	177.002	178.223	180.359	181.274	179.749	179.749
38.1	174.255	178.223	179.749	180.664	179.443	176.697	178.223	179.749	181.885	180.054	179.443
38.2	174.866	177.917	180.054	180.359	180.054	177.002	177.612	179.443	182.495	180.664	179.443
38.3	175.171	177.917	180.359	180.664	180.664	177.612	177.612	179.443	182.495	180.969	179.443
38.4	174.866	177.307	181.274	181.274	180.969	177.612	177.917	179.443	182.19	180.969	178.833
38.5	174.866	176.697	182.495	181.58	180.969	177.612	178.833	179.749	181.274	180.969	178.223
38.6	174.561	176.697	183.105	181.58	181.274	177.612	180.054	179.749	180.664	181.274	178.223
38.7	174.561	177.307	183.411	180.969	181.274	177.612	180.664	179.443	180.359	181.58	178.528
38.8	174.866	177.917	183.105	181.274	181.885	177.917	180.969	178.833	180.359	181.885	178.833
38.9	174.255	178.528	182.495	181.885	182.19	177.917	180.664	178.528	180.664	181.885	179.138
39	173.645	178.528	182.495	182.19	182.19	177.917	180.664	178.223	180.969	181.885	179.138
39.1	173.035	179.138	182.495	182.495	181.885	178.223	180.359	178.528	181.274	181.58	179.443
39.2	172.729	179.443	182.8	182.495	181.58	178.223	180.054	178.528	181.274	181.58	179.138
39.3	172.729	180.054	183.411	182.8	181.274	178.223	180.054	178.528	181.274	181.885	178.528
39.4	173.035	180.664	184.326	182.8	181.274	177.917	179.443	179.138	181.58	181.885	177.917
39.5	173.035	180.969	184.631	183.105	181.58	177.612	179.138	179.749	181.58	181.885	177.612
39.6	173.34	180.969	184.326	183.105	181.58	177.612	178.528	180.359	181.58	181.58	178.223
39.7	173.95	180.359	183.716	182.495	181.58	177.917	178.528	181.274	181.885	180.969	179.138
39.8	174.255	179.443	182.8	182.19	180.969	177.917	178.833	181.885	182.19	180.359	179.443
39.9	173.95	178.528	182.19	181.885	180.664	178.223	178.833	181.885	182.19	180.054	179.443
40	173.035	177.307	182.19	181.58	180.359	178.223	178.528	181.274	181.58	180.359	179.138
40.1	172.119	176.697	182.495	181.58	180.054	178.528	178.223	180.969	181.274	180.664	179.138
40.2	171.509	176.392	182.495	181.58	179.749	178.833	178.223	180.969	180.969	181.274	179.138
40.3	171.814	176.392	182.495	180.969	179.749	178.833	178.223	180.969	181.274	181.885	179.443
40.4	172.424	176.392	182.495	180.359	180.054	179.138	177.917	180.969	181.885	182.19	179.749
40.5	173.34	176.086	182.495	179.749	180.054	179.138	178.223	180.664	181.885	182.495	179.749
40.6	173.95	175.781	182.8	179.443	180.054	179.138	178.223	180.664	181.58	182.8	179.749
40.7	173.95	175.781	182.8	179.443	180.054	178.833	177.917	180.359	180.664	182.19	180.359
40.8	173.645	175.781	183.105	179.443	180.054	178.528	177.917	180.359	180.664	181.58	180.969
40.9	173.34	176.086	183.105	179.749	180.054	178.223	178.223	180.664	180.664	181.274	181.274
41	173.035	176.392	183.411	180.664	180.054	178.223	178.528	181.274	181.274	180.664	181.58
41.1	172.729	176.697	184.326	181.274	180.664	178.223	178.833	181.885	181.885	180.664	181.58
41.2	173.035	177.307	184.631	180.969	181.274	178.223	179.138	182.19	182.19	180.359	181.58
41.3	173.34	177.307	184.326	180.664	181.58	177.612	179.138	182.495	182.495	180.359	182.19
41.4	173.34	177.002	183.105	180.054	181.58	177.307	178.833	182.495	182.495	180.359	182.8
41.5	173.34	176.392	181.885	180.054	181.274	177.917	178.223	182.495	181.885	179.749	183.105
41.6	173.035	175.781	181.58	179.749	180.969	178.528	178.223	182.19	181.274	179.138	183.105
41.7	173.035	175.781	181.885	179.749	180.359	178.833	178.223	182.19	180.664	178.833	182.8
41.8	173.035	175.781	182.19	179.138	179.749	178.528	178.223	182.19	180.054	178.528	182.495
41.9	173.035	176.086	182.19	179.138	180.054	178.223	178.528	182.19	180.359	178.528	182.495
42	173.035	176.392	182.19	179.138	180.359	177.612	178.833	182.19	181.274	178.528	181.885
42.1	173.035	177.002	182.8	179.138	180.969	177.002	178.833	182.495	181.885	179.138	181.274
42.2	172.424	177.307	183.411	178.833	181.885	176.392	178.833	182.495	182.19	179.749	180.969
42.3	172.424	177.307	184.021	178.528	182.495	175.781	178.528	182.19	182.19	180.359	180.664
42.4	172.119	177.307	184.021	178.833	182.495	175.171	178.528	182.19	182.19	181.274	180.359
42.5	171.814	177.307	184.021	179.443	181.58	174.561	179.138	181.885	182.495	182.495	180.359
42.6	171.814	177.307	184.021	179.749	180.664	174.561	179.443	181.885	182.495	182.8	180.054
42.7	171.814	177.307	184.326	180.054	179.749	175.171	179.749	181.885	182.8	182.8	180.054
42.8	171.814	177.307	184.021	179.443	179.749	175.781	180.054	181.274	182.8	182.495	180.359
42.9	171.814	177.002	183.716	178.528	180.054	176.392	180.054	180.664	183.105	182.19	180.969
43	171.814	176.392	183.411	177.917	180.359	177.002	180.054	180.054	183.411	182.19	181.885
43.1	171.814	176.086	183.411	177.612	180.664	177.307	179.749	180.054	182.8	182.19	182.19
43.2	172.119	176.392	183.411	177.307	180.664	177.612	179.443	180.359	182.495	181.885	182.19
43.3	172.424	176.392	183.411	177.307	180.664	177.917	179.138	180.359	181.58	181.274	181.885
43.4	172.729	177.002	183.105	177.612	180.359	178.223	179.138	180.664	180.969	180.664	181.274
43.5	173.34	177.307	182.8	177.307	179.749	178.528	179.138	180.969	180.359	180.054	180.969
43.6	173.645	177.612	182.19	177.307	179.138	178.528	179.138	181.274	180.359	179.749	180.054
43.7	173.645	178.223	181.885	177.307	178.833	178.223	179.138	181.274	180.359	180.054	179.443
43.8	173.34	178.833	181.885	177.612	179.443	177.917	179.443	181.274	180.054	180.359	178.833
43.9	173.035	179.443	181.885	177.612	180.054	177.612	179.749	181.274	179.749	180.359	178.833
44	172.424	179.443	182.495	177.917	180.664	177.612	180.054	181.58	179.443	180.359	179.138
44.1	172.119	178.833	182.8	177.917	181.274	177.917	180.054	181.58	179.138	180.664	179.443
44.2	172.424	177.917	183.105	177.917	181.58	178.223	179.749	181.885	179.138	180.969	179.443
44.3	172.729	177.307	183.105	178.223	181.58	178.528	179.443	181.58	179.749	181.274	179.443
44.4	173.035	177.307	183.105	178.528	181.885	178.528	179.138	181.274	180.054	181.274	179.749
44.5	173.035	177.612	183.105	179.138	182.19	178.528	179.443	180.969	180.664	181.274	180.359
44.6	172.729	178.223	183.411	179.749	182.495	178.223	179.749	180.359	180.969	181.58	180.969
44.7	172.424	178.528	184.021	180.054	182.8	178.223	180.359	180.054	181.58	181.58	181.274
44.8	172.119	178.223	184.021	180.054	182.495	178.528	180.664	180.054	181.885	181.885	181.58
44.9	171.814	177.917	184.021	179.749	182.19	179.138	180.664	180.359	181.58	181.885	181.274
45	171.814	177.917	183.716	179.443	181.58	179.443	180.969	180.664	181.58	182.19	181.274
45.1	171.814	177.917	183.105	179.749	181.58	179.443	181.274	180.969	181.274	182.495	181.58
45.2	172.119	177.917	182.495	180.359	181.885	179.138	181.274	180.969	181.274	183.105	181.274
45.3	172.119	177.612	182.495	180.664	182.495	178.833	181.58	181.274	181.274	183.105	180.664
45.4	172.424	176.697	182.495	180.664	183.105	178.833	181.58	181.58	181.58	182.495	180.359
45.5	172.424	176.086	182.8	180.359	183.105	179.138	182.19	182.19	181.58	181.885	180.359
45.6	172.729	176.086	182.8	180.054	182.8	179.749	182.19	182.495	181.274	181.274	180.054
45.7	173.34	176.086	182.8	179.749	182.495	180.664	182.495	182.19	180.969	181.58	179.443
45.8	173.645	176.392	182.8	179.138	182.19	180.969	182.495	181.58	180.664	181.885	179.138
45.9	173.95	176.697	182.8	178.528	181.885	181.58	182.19	181.274	180.359	182.19	179.138
46	173.95	177.307	182.495	178.528	181.58	181.58	182.19	181.274	180.054	181.885	179.443
46.1	173.645	177.307	182.495	178.833	181.58	180.969	182.19	181.58	180.054	181.58	179.749
46.2	173.34	177.307	182.495	179.749	181.58	180.664	182.19	181.885	180.054	181.274	180.054
46.3	173.035	177.307	182.19	180.359	180.969	180.359	182.19	182.19	179.443	180.969	180.664
46.4	173.035	177.612	181.885	180.359	180.664	179.749	182.19	182.495	179.138	180.359	181.58
46.5	172.729	178.528	181.274	179.443	180.359	179.443	181.274	182.19	179.138	179.749	182.19
46.6	172.729	179.138	180.359	178.223	180.054	179.443	180.359	181.274	179.138	179.443	182.19
46.7	172.729	179.138	179.749	177.917	180.359	179.749	179.443	180.969	179.138	179.749	182.495
46.8	173.035	178.223	179.749	178.223	180.359	180.054	178.528	180.664	178.833	180.054	182.495
46.9	172.729	177.612	180.054	178.833	180.359	180.054	177.917	180.664	178.528	180.664	181.885
47	172.424	177.612	180.359	179.443	180.359	180.054	177.612	180.664	178.528	180.969	181.58
47.1	172.119	178.223	180.969	178.833	180.359	179.749	177.002	180.969	178.528	180.969	181.58
47.2	172.424	179.138	181.58	178.223	180.359	179.443	176.392	181.274	178.833	180.664	181.885
47.3	172.729	179.749	182.19	177.612	180.359	179.138	176.392	181.274	179.138	180.664	181.58
47.4	172.729	179.749	182.495	177.612	180.359	178.833	177.002	181.274	179.443	180.664	181.274
47.5	172.729	179.749	182.8	177.917	180.359	178.833	177.917	181.58	179.749	180.664	181.274
47.6	173.035	179.443	182.8	178.223	180.664	178.528	178.833	181.58	180.054	180.664	181.58
47.7	172.729	179.138	183.105	178.528	180.664	178.528	178.833	181.885	180.054	180.359	182.19
47.8	172.424	178.833	182.8	178.528	180.359	178.528	178.528	181.885	179.443	179.749	182.495
47.9	171.814	179.138	182.495	178.528	179.443	178.528	178.223	182.495	178.833	179.443	182.8
48	171.814	179.443	181.274	178.833	178.833	178.833	177.917	182.495	178.833	179.443	182.495
48.1	171.814	179.749	180.664	179.138	178.223	178.833	178.223	182.495	178.833	179.443	182.19
48.2	172.119	180.054	180.359	179.443	178.528	178.833	178.528	182.19	178.833	179.443	182.495
48.3	172.119	180.359	180.359	179.443	179.138	178.833	179.138	181.58	178.833	179.138	182.495
48.4	172.424	180.359	180.359	179.443	180.054	178.528	179.443	181.274	178.833	179.138	181.885
48.5	172.729	180.054	180.664	179.443	180.969	177.917	179.138	181.274	179.443	179.749	181.274
48.6	172.729	179.749	181.58	180.054	181.274	177.307	178.833	181.274	180.054	180.359	180.664
48.7	172.424	179.443	182.19	180.054	181.58	176.697	178.833	181.274	180.359	181.274	180.664
48.8	172.424	179.138	182.495	180.054	181.58	176.697	178.833	180.969	180.664	181.885	180.969
48.9	172.424	178.528	182.495	179.749	181.58	177.002	178.528	180.359	180.359	181.885	181.58
49	172.424	178.223	181.885	179.749	181.58	177.612	178.833	180.054	180.054	182.19	181.885
49.1	172.119	178.223	181.274	179.749	181.274	178.223	178.833	179.749	179.749	181.885	181.885
49.2	171.814	178.223	180.664	180.054	181.274	178.528	179.138	179.443	179.138	181.274	182.19
49.3	172.119	178.528	180.664	180.054	181.885	178.528	179.443	179.443	179.138	180.664	182.495
49.4	172.729	178.833	180.969	180.054	182.19	178.528	179.749	179.138	179.443	180.054	182.8
49.5	172.729	178.833	181.274	180.054	182.19	178.833	180.054	179.443	179.749	179.749	182.19
49.6	173.035	178.833	180.969	180.359	182.19	178.528	180.054	179.749	180.054	179.443	181.885
49.7	173.035	178.833	180.359	180.969	181.885	178.223	180.664	180.359	180.359	179.138	181.58
49.8	173.34	179.138	180.054	180.969	181.58	178.223	180.969	181.274	180.359	179.138	181.885
49.9	173.34	179.138	180.054	180.969	181.274	178.528	181.274	181.885	179.749	178.833	181.885
50	173.34	179.443	180.054	180.969	180.664	179.138	181.274	181.58	179.443	178.833	181.58
50.1	173.035	179.138	180.664	181.274	179.749	179.443	181.274	180.664	179.443	178.528	181.58
50.2	172.729	179.138	180.969	181.885	179.138	179.443	181.274	180.054	179.749	178.528	182.19
50.3	172.119	179.138	181.58	182.495	178.528	180.054	181.58	180.054	180.054	178.528	182.495
50.4	171.814	179.138	182.495	182.495	178.833	180.664	181.58	180.359	180.359	178.223	182.8
50.5	171.509	178.833	183.105	182.495	179.443	181.274	181.885	180.969	180.664	178.528	182.8
50.6	171.509	178.833	183.411	181.885	180.054	181.58	181.58	180.969	180.969	178.528	183.105
50.7	171.509	178.528	183.411	181.885	180.664	182.19	180.969	180.969	181.58	178.833	183.411
50.8	171.814	178.528	183.411	181.885	180.969	181.885	180.664	181.58	182.19	178.833	183.411
50.9	172.119	178.528	183.105	182.19	181.274	181.274	180.664	181.885	183.105	179.443	183.105
51	172.119	178.528	182.8	182.8	181.274	180.054	180.664	182.19	183.716	179.749	182.8
51.1	172.729	178.223	182.8	183.411	180.969	179.138	180.664	182.19	183.716	179.443	182.495
51.2	173.34	178.223	182.8	183.716	180.664	178.223	180.664	181.885	183.105	178.833	182.19
51.3	173.95	178.223	182.8	183.716	180.664	177.612	181.274	181.885	181.58	178.528	181.58
51.4	174.561	178.223	183.105	183.411	181.274	177.002	182.19	181.58	180.664	178.528	181.58
51.5	174.561	177.917	183.411	182.8	181.58	177.002	182.495	181.58	180.664	178.528	181.58
51.6	174.255	177.307	182.8	182.8	181.58	177.307	182.495	181.58	180.664	178.833	182.19
51.7	173.645	176.392	182.19	182.495	181.274	177.612	181.885	180.969	180.664	179.443	182.495
51.8	173.035	176.086	181.58	182.495	180.664	178.528	181.58	180.359	180.969	180.054	182.19
51.9	172.424	176.086	180.969	182.19	180.359	179.749	180.969	180.054	180.969	180.969	181.885
52	172.119	176.697	180.054	182.19	179.749	180.359	180.664	179.443	181.274	180.969	181.274
52.1	172.119	177.307	179.443	182.8	179.138	180.664	180.359	179.443	181.274	180.969	181.274
52.2	172.119	177.307	179.443	182.8	179.138	180.359	180.359	179.749	180.969	180.664	181.274
52.3	172.119	177.307	179.749	182.495	179.443	180.664	180.359	180.969	180.359	180.359	181.274
52.4	172.119	177.002	180.054	181.58	180.054	180.969	180.359	182.19	179.443	180.054	181.885
52.5	172.424	177.002	180.664	180.664	180.969	181.274	180.054	182.8	178.833	180.054	182.19
52.6	172.729	177.002	180.969	179.749	180.969	181.885	179.749	182.8	178.528	180.054	182.495
52.7	172.424	177.612	180.969	179.138	180.359	182.19	180.054	183.411	178.528	180.359	182.495
52.8	171.814	178.223	180.664	179.138	180.054	181.885	180.359	184.021	178.528	180.359	182.495
52.9	171.509	178.528	180.969	179.138	180.054	181.274	180.664	185.242	178.833	180.054	182.8
53	171.814	178.223	181.58	179.138	180.359	180.359	180.969	185.852	179.138	179.749	183.105
53.1	172.424	177.917	181.885	179.443	180.359	179.749	181.274	185.852	179.138	179.749	183.716
53.2	173.035	177.612	181.885	180.054	180.359	179.138	181.274	185.242	179.138	180.359	183.716
53.3	173.34	177.307	181.274	180.664	180.359	178.528	180.969	184.021	179.443	180.664	183.716
53.4	174.255	177.307	180.969	180.969	180.054	178.223	180.664	183.105	180.054	181.58	183.105
53.5	174.866	177.307	180.664	180.664	180.054	177.917	180.664	183.105	180.359	181.885	182.19
53.6	174.866	177.307	180.054	180.359	180.054	177.917	180.664	183.411	180.969	181.885	181.274
53.7	174.561	177.307	180.054	179.749	180.359	177.917	180.664	183.716	180.969	180.664	181.274
53.8	174.255	177.002	180.054	179.443	180.359	178.528	180.664	183.716	180.664	179.138	182.19
53.9	173.645	176.697	180.054	179.138	180.054	179.749	180.359	183.716	179.749	178.528	183.411
54	173.035	176.392	180.359	178.528	179.749	180.359	180.664	183.716	179.138	178.528	183.716
54.1	172.119	177.002	180.664	178.223	179.749	180.664	181.274	183.411	179.138	178.833	183.716
54.2	171.814	177.307	180.359	178.223	180.054	180.359	181.274	184.021	180.054	178.833	183.411
54.3	172.119	177.307	180.359	178.223	180.359	179.749	180.969	184.631	180.664	179.138	183.716
54.4	172.424	177.307	180.664	178.833	180.664	179.138	180.969	184.937	181.274	179.138	184.021
54.5	172.424	177.307	181.274	179.443	180.969	178.833	181.274	184.631	181.274	179.443	184.326
54.6	171.814	177.002	181.58	180.054	180.969	179.443	181.58	184.021	180.969	179.443	184.937
54.7	171.509	176.697	181.58	180.359	181.58	179.443	181.58	184.021	180.969	179.443	185.242
54.8	171.509	176.392	181.274	179.749	182.495	179.443	181.58	184.021	180.664	179.443	184.937
54.9	171.814	176.086	180.054	179.138	182.8	179.443	181.274	184.021	180.054	179.443	184.326
55	172.729	176.086	179.138	178.833	182.495	179.138	180.969	183.716	179.443	179.443	183.716
55.1	173.035	175.781	179.138	178.528	181.58	178.528	180.664	183.411	179.138	179.138	182.8
55.2	173.035	175.171	179.138	178.528	180.359	178.528	180.054	182.8	179.138	178.833	182.19
55.3	172.119	175.781	179.443	179.138	179.443	178.528	179.443	182.19	179.749	178.528	182.495
55.4	171.509	176.697	179.749	179.749	179.443	178.528	178.528	181.58	180.054	178.223	182.8
55.5	171.814	177.307	180.054	180.054	180.054	178.528	178.528	181.274	180.054	178.223	183.411
55.6	172.424	177.307	180.359	180.054	180.664	177.917	179.443	181.274	179.749	178.833	183.105
55.7	173.035	177.002	180.664	180.359	180.969	177.917	180.359	181.274	179.749	179.138	182.8
55.8	173.34	176.697	180.969	180.664	180.969	178.223	181.274	181.58	179.749	179.138	182.19
55.9	173.34	176.697	181.58	180.969	180.969	178.528	181.58	182.19	180.054	179.749	181.58
56	173.645	177.002	181.885	181.274	180.664	178.833	181.274	182.495	180.359	180.359	181.274
56.1	174.255	177.002	181.885	181.58	180.359	179.138	180.969	182.495	180.359	180.969	181.274
56.2	175.171	176.697	181.58	181.885	180.054	179.443	180.664	182.19	180.054	180.969	181.58
56.3	175.476	177.002	181.274	181.58	179.749	179.138	180.359	181.885	179.443	180.664	182.19
56.4	175.781	177.612	181.274	180.664	180.054	178.833	180.054	181.885	179.443	180.664	183.105
56.5	175.476	177.917	181.274	180.054	180.054	178.528	179.443	181.885	179.749	180.969	184.326
56.6	175.171	177.612	181.274	179.749	180.054	178.528	179.138	182.495	180.054	181.58	184.631
56.7	174.255	177.002	181.274	180.054	180.054	178.528	178.833	183.105	180.054	181.885	184.326
56.8	173.95	176.392	180.969	180.359	180.054	179.138	179.138	183.411	179.443	181.885	184.021
56.9	173.645	176.086	181.274	180.359	180.664	179.443	179.443	183.105	178.833	181.58	183.411
57	173.34	176.392	181.274	180.359	180.969	179.138	179.749	182.495	179.138	180.969	183.716
57.1	173.34	176.086	181.274	180.664	180.969	179.138	180.054	182.19	179.138	180.969	184.021
57.2	173.645	176.392	181.58	181.274	181.274	179.138	180.359	182.19	179.443	181.274	184.326
57.3	173.645	177.002	181.58	181.58	181.885	178.833	180.664	182.8	180.054	181.274	184.631
57.4	173.645	177.917	181.58	181.58	182.8	178.528	180.969	183.411	180.359	181.274	184.326
57.5	173.34	178.528	181.58	181.274	183.105	177.917	180.969	183.716	180.359	181.274	183.716
57.6	173.035	178.223	181.58	180.359	183.105	177.307	181.274	183.411	180.054	181.274	183.105
57.7	172.729	177.612	181.58	179.749	183.105	177.612	181.58	182.495	179.749	181.58	182.8
57.8	172.119	177.307	181.274	179.138	182.8	178.223	181.274	181.885	180.054	181.58	183.105
57.9	171.509	177.002	180.969	179.138	182.19	178.833	181.274	181.58	180.054	181.885	183.716
58	128.479	137.634	146.79	153.198	166.626	179.443	197.754	209.961	217.59	225.525	231.323
58.1	-466.614	-366.211	-250.854	-127.258	13.7329	179.749	359.802	506.287	638.733	757.141	856.628
58.2	-1850.28	-1495.97	-1114.5	-715.942	-295.41	180.359	681.152	1119.08	1539	1931.46	2294.62
58.3	-3346.56	-2694.4	-2014.16	-1316.83	-602.112	180.969	995.178	1735.53	2461.85	3157.65	3829.35
58.4	-4272.16	-3422.24	-2550.35	-1666.26	-773.01	181.58	1166.08	2085.27	2997.74	3884.28	4759.22
58.5	-4443.97	-3544.31	-2630	-1709.9	-785.828	181.58	1173.4	2118.53	3062.44	3987.43	4911.5
58.6	-4060.67	-3227.23	-2383.42	-1538.39	-691.223	180.969	1071.78	1933.9	2797.55	3648.38	4505
58.7	-3422.85	-2711.18	-1992.19	-1273.5	-552.673	179.749	927.124	1659.24	2392.58	3117.98	3851.32
58.8	-2756.35	-2175.9	-1589.05	-1003.72	-414.124	178.528	784.302	1383.97	1982.42	2576.6	3179.63
58.9	-2173.77	-1709.59	-1239.01	-770.569	-296.021	177.612	663.757	1148.99	1630.86	2111.51	2600.71
59	-1704.71	-1334.84	-958.557	-584.106	-202.026	176.697	569.153	963.135	1351.93	1742.55	2141.11
59.1	-1340.33	-1044.01	-741.272	-440.063	-129.7	176.086	497.131	820.312	1137.39	1460.27	1787.72
59.2	-1059.27	-820.312	-574.341	-329.59	-74.7681	176.086	441.895	711.06	973.511	1245.42	1518.25
59.3	-841.98	-647.583	-445.557	-244.446	-32.6538	176.392	399.17	626.831	848.389	1080.93	1312.87
59.4	-673.218	-513.611	-346.069	-177.917	0	176.697	366.516	561.829	752.258	954.895	1155.4
59.5	-542.603	-409.546	-268.555	-126.343	24.7192	177.307	341.492	511.78	678.711	857.849	1035.16
59.6	-441.284	-328.674	-209.045	-86.0596	43.6401	178.223	322.266	474.243	622.559	782.776	943.298
59.7	-362.854	-266.113	-162.659	-55.2368	57.6782	179.138	307.007	445.557	580.139	725.098	873.413
59.8	-301.819	-217.59	-126.953	-32.0435	68.9697	179.443	295.105	423.889	547.485	681.763	820.312
59.9	-254.211	-179.749	-99.7925	-14.3433	78.125	179.749	285.95	407.41	522.766	649.414	779.724
60	-217.285	-150.146	-78.4302	-0.610352	85.4492	179.443	279.236	394.897	503.54	625	748.596
60.1	-187.988	-126.343	-61.6455	9.76562	91.2476	179.443	274.353	385.132	488.892	605.774	724.487
60.2	-164.795	-108.032	-48.5229	18.3105	95.52	179.443	270.996	377.502	477.905	590.515	706.177
60.3	-146.484	-93.3838	-37.5366	25.6348	98.5718	179.443	268.555	371.704	469.666	578.308	691.528
60.4	-131.531	-81.4819	-28.6865	31.1279	100.708	179.749	267.029	366.516	463.867	569.153	679.932
60.5	-119.629	-72.0215	-22.2778	35.7056	102.234	179.749	265.808	362.549	459.29	561.523	671.082
60.6	-110.168	-65.0024	-17.7002	39.0625	103.76	179.749	264.282	359.192	455.322	555.42	664.673
60.7	-102.234	-59.5093	-14.0381	42.4194	105.286	179.443	263.367	356.75	451.66	551.147	660.095
60.8	-95.52	-55.2368	-10.9863	45.166	106.201	178.833	262.146	354.614	448.303	548.096	655.823
60.9	-89.7217	-51.5747	-7.93457	46.9971	107.117	178.528	261.23	352.783	445.557	546.265	652.466
61	-84.8389	-48.5229	-5.49316	47.9126	108.032	177.917	260.315	351.257	443.726	545.044	649.414
61.1	-81.1768	-45.7764	-3.66211	48.2178	108.948	178.223	259.705	350.037	442.2	544.128	647.583
61.2	-78.125	-43.335	-2.13623	48.5229	109.863	178.528	259.705	348.816	440.674	542.908	646.362
61.3	-75.3784	-41.1987	-0.915527	49.1333	109.863	178.528	259.705	348.206	439.453	541.687	645.447
61.4	-73.5474	-39.3677	0.305176	50.354	109.253	178.833	260.01	347.595	438.538	540.771	644.531
61.5	-71.7163	-37.8418	1.83105	51.2695	108.948	179.138	260.315	346.985	437.927	539.551	643.311
61.6	-69.8853	-36.3159	3.05176	51.8799	109.558	178.833	260.315	346.985	437.012	537.72	642.7
61.7	-68.0542	-35.4004	3.96729	52.1851	110.779	178.833	260.62	347.29	436.401	535.889	643.005
61.8	-66.2231	-34.79	4.57764	52.7954	111.694	178.833	260.62	347.29	436.401	534.363	642.395
61.9	-65.0024	-33.8745	5.18799	53.7109	112.305	178.833	260.315	346.68	436.401	533.142	640.564
62	-63.7817	-33.2642	5.49316	54.6265	112.915	178.223	259.399	345.764	436.707	531.616	638.733
62.1	-62.561	-32.6538	6.10352	54.9316	113.22	177.612	258.179	345.459	436.707	530.701	637.207
62.2	-61.3403	-31.7383	6.40869	55.542	113.525	177.002	257.263	345.459	435.181	529.785	636.292
62.3	-60.1196	-30.8228	6.71387	55.8472	113.525	177.002	256.958	345.459	433.044	529.175	635.071
62.4	-58.5937	-30.2124	7.01904	56.1523	113.22	177.307	257.568	344.543	431.519	528.564	634.155
62.5	-57.373	-29.9072	7.32422	56.1523	113.22	178.223	257.874	343.628	430.908	528.259	633.85
62.6	-56.7627	-29.2969	7.62939	56.1523	113.22	179.443	257.568	343.323	430.908	527.649	633.24
62.7	-56.4575	-28.9917	7.62939	56.1523	114.136	179.749	257.568	343.018	431.213	526.733	632.935
62.8	-56.1523	-28.0762	7.93457	56.4575	114.441	179.138	257.263	343.323	431.519	526.123	632.019
62.9	-55.8472	-27.1606	8.23975	57.373	114.136	178.528	256.958	343.018	431.519	524.902	631.104
63	-54.9316	-26.5503	8.54492	57.9834	113.22	178.223	256.958	342.102	431.519	523.987	630.188
63.1	-54.0161	-26.2451	9.15527	57.9834	112	178.223	256.958	341.187	431.213	523.376	629.272
63.2	-52.7954	-25.3296	9.76562	57.373	111.694	178.223	256.958	340.271	431.519	523.071	627.747
63.3	-51.8799	-24.1089	9.76562	57.373	112.305	178.223	256.653	339.355	431.824	522.766	626.831
63.4	-50.6592	-23.4985	10.0708	57.373	113.22	178.223	256.348	338.745	432.129	523.071	626.526
63.5	-50.0488	-22.8882	10.9863	57.6782	113.831	178.528	255.127	338.44	432.739	523.682	626.526
63.6	-50.0488	-22.2778	11.9019	58.5937	113.831	178.833	253.906	338.135	432.739	524.292	626.831
63.7	-50.0488	-21.9727	12.8174	59.2041	113.22	179.443	253.296	338.135	432.434	524.902	627.441
63.8	-49.7437	-21.9727	13.4277	59.5093	112.915	179.443	252.991	338.44	431.824	525.208	627.747
63.9	-49.4385	-22.583	13.7329	59.8145	112.61	179.443	253.296	338.745	431.213	525.208	628.052
64	-48.2178	-22.583	14.3433	59.8145	112.915	178.833	253.601	339.05	430.908	524.292	627.747
64.1	-46.9971	-21.6675	14.6484	59.5093	113.22	178.528	253.906	339.05	430.908	523.071	627.136
64.2	-45.7764	-20.752	14.9536	59.2041	113.525	177.917	254.517	339.05	430.603	521.851	626.526
64.3	-44.8608	-20.1416	15.2588	58.8989	113.831	177.917	254.822	339.355	430.603	521.24	625.916
64.4	-44.5557	-19.8364	15.2588	58.8989	113.831	177.917	254.822	339.05	430.298	520.935	625.305
64.5	-44.2505	-19.8364	14.6484	59.2041	113.525	178.223	254.822	338.745	429.687	520.63	624.39
64.6	-43.9453	-19.8364	14.3433	59.5093	113.22	179.138	254.517	338.745	428.772	520.02	623.169
64.7	-43.9453	-19.5312	14.3433	59.5093	112.915	179.443	254.517	338.44	427.856	519.714	622.253
64.8	-43.9453	-19.2261	14.9536	59.5093	113.22	179.443	255.127	338.745	427.246	519.104	622.253
64.9	-43.335	-18.6157	15.2588	59.2041	113.525	178.833	255.432	339.355	426.025	519.104	622.559
65	-42.7246	-18.0054	14.9536	58.8989	113.831	178.528	255.432	339.661	424.805	520.02	622.559
65.1	-41.8091	-18.0054	14.9536	58.8989	113.831	178.528	255.432	339.966	423.279	521.545	622.559
65.2	-41.5039	-18.3105	14.9536	59.2041	113.525	178.833	255.127	339.661	422.363	522.766	622.253
65.3	-41.5039	-18.0054	14.6484	59.8145	113.525	179.138	255.127	338.745	421.753	523.682	621.643
65.4	-41.8091	-17.395	14.6484	60.1196	113.525	179.443	254.822	337.524	421.753	523.682	621.033
65.5	-42.1143	-17.0898	14.9536	60.1196	113.525	179.138	254.517	336.304	422.058	522.766	619.812
65.6	-42.1143	-17.0898	15.8691	60.1196	113.525	178.833	254.517	335.083	422.974	521.851	618.286
65.7	-41.5039	-17.7002	16.7847	60.4248	114.136	178.223	254.211	334.167	423.889	521.851	617.065
65.8	-40.8936	-17.7002	17.7002	61.0352	114.136	177.612	254.517	333.862	425.11	521.851	616.76
65.9	-40.2832	-17.7002	17.7002	61.3403	114.136	177.307	254.517	333.862	425.72	521.851	617.065
66	-39.978	-16.7847	17.7002	61.3403	113.831	177.612	254.822	334.473	426.025	521.545	617.981
66.1	-40.2832	-15.8691	17.395	61.0352	114.136	177.917	254.822	335.083	425.72	521.24	618.591
66.2	-40.2832	-15.2588	17.395	60.4248	114.136	178.528	254.822	334.778	425.415	521.24	618.896
66.3	-40.5884	-14.9536	17.0898	59.8145	114.136	179.443	254.822	334.473	425.11	521.24	618.591
66.4	-40.5884	-14.6484	17.0898	59.8145	114.136	179.749	254.517	334.167	424.805	521.24	618.591
66.5	-40.5884	-14.3433	16.7847	59.8145	113.525	179.138	254.517	334.167	424.805	521.24	618.286
66.6	-40.2832	-14.3433	16.4795	59.5093	113.831	178.528	254.517	333.862	424.194	520.935	617.676
66.7	-39.6729	-14.6484	16.4795	59.8145	114.136	178.223	254.517	332.947	423.889	520.325	617.065
66.8	-39.3677	-14.6484	16.7847	60.1196	114.441	178.528	254.517	332.336	423.584	519.409	616.455
66.9	-38.7573	-14.9536	17.395	60.4248	114.136	178.833	253.906	332.031	423.584	517.883	616.15
67	-38.4521	-14.9536	18.0054	60.4248	113.525	179.138	253.601	332.031	423.584	516.357	615.54
67.1	-38.147	-14.9536	18.6157	60.73	113.525	179.138	253.601	332.336	423.584	515.137	615.234
67.2	-38.147	-14.3433	18.6157	61.3403	113.525	179.443	254.517	332.336	423.584	514.526	615.234
67.3	-37.8418	-14.0381	18.3105	61.9507	113.831	179.749	255.127	332.336	422.974	514.526	614.624
67.4	-37.5366	-13.1226	18.0054	62.2559	114.136	179.749	255.737	333.252	422.363	514.221	614.014
67.5	-37.2314	-12.207	18.0054	62.2559	114.441	179.749	255.432	334.167	421.448	513.916	613.403
67.6	-36.6211	-11.5967	18.0054	62.2559	114.441	179.138	255.127	334.778	420.837	513.611	612.793
67.7	-36.0107	-11.2915	18.0054	62.561	114.746	178.833	254.822	335.083	420.532	513.916	612.488
67.8	-35.7056	-11.9019	18.6157	62.561	114.746	178.833	254.517	335.083	420.227	514.832	612.488
67.9	-36.0107	-12.207	19.2261	61.9507	115.051	179.138	254.517	334.778	420.227	515.747	612.183
68	-36.3159	-11.9019	19.8364	61.9507	115.051	179.749	254.517	334.167	420.837	516.052	611.877
68.1	-36.6211	-11.5967	20.1416	62.2559	115.051	180.054	254.517	333.862	421.143	515.747	611.572
68.2	-36.6211	-11.2915	19.8364	62.2559	115.051	180.359	254.211	333.862	421.448	514.526	611.572
68.3	-36.0107	-11.2915	19.8364	62.2559	115.051	180.969	254.211	333.862	421.143	512.695	611.267
68.4	-35.7056	-10.9863	20.1416	61.9507	115.356	181.274	254.211	333.862	420.837	511.169	611.267
68.5	-35.0952	-10.9863	20.1416	62.2559	115.051	181.274	254.211	333.557	421.448	509.949	610.962
68.6	-34.79	-10.9863	20.1416	62.8662	115.051	180.969	254.517	332.947	422.058	509.644	610.962
68.7	-34.79	-10.9863	20.1416	63.4766	115.356	180.054	254.211	332.336	422.363	509.949	611.572
68.8	-34.79	-11.5967	20.1416	63.4766	115.967	179.443	254.211	332.031	422.363	510.559	612.183
68.9	-35.0952	-12.207	20.4468	63.1714	116.577	178.833	254.211	332.031	422.058	510.864	612.793
69	-34.79	-12.5122	20.4468	62.8662	117.187	178.528	254.211	332.031	421.448	510.254	613.403
69.1	-34.79	-12.8174	20.4468	62.8662	116.882	178.223	254.211	332.336	421.143	509.338	614.014
69.2	-34.79	-12.8174	19.8364	62.8662	116.577	178.528	254.211	332.642	420.532	508.728	614.624
69.3	-34.4849	-12.8174	19.5312	63.1714	116.577	178.528	254.822	332.642	419.922	508.728	615.234
69.4	-33.8745	-12.5122	19.2261	63.7817	115.967	178.833	255.432	332.336	419.006	509.033	614.319
69.5	-33.5693	-11.9019	19.5312	63.7817	115.356	179.138	255.737	332.031	418.701	509.949	613.098
69.6	-32.959	-11.5967	20.1416	63.4766	115.356	179.749	256.042	331.421	418.701	510.559	611.267
69.7	-32.6538	-11.2915	20.752	63.4766	115.662	179.749	256.348	331.421	418.396	510.864	609.741
69.8	-32.959	-10.9863	21.3623	63.4766	116.272	179.749	256.653	331.421	418.091	511.169	608.215
69.9	-33.5693	-10.6812	21.6675	63.7817	115.967	179.443	256.653	331.726	417.48	511.169	606.689
70	-34.4849	-10.0708	21.9727	64.0869	115.662	179.443	256.653	331.726	416.87	511.169	605.774
70.1	-34.79	-9.15527	22.2778	64.0869	115.356	179.749	256.653	331.726	416.87	510.254	604.858
70.2	-34.79	-8.54492	22.2778	64.3921	115.051	179.749	256.348	332.336	417.175	509.033	603.943
70.3	-34.1797	-8.23975	21.9727	64.0869	114.746	179.749	255.737	332.642	417.175	508.423	604.248
70.4	-33.5693	-8.23975	21.6675	63.4766	114.746	179.138	254.822	333.252	417.175	508.118	605.164
70.5	-32.959	-8.8501	21.3623	62.561	114.746	178.528	253.906	333.557	417.48	509.033	606.384
70.6	-32.3486	-9.46045	21.3623	62.2559	115.051	178.528	252.991	333.557	416.565	509.949	607.605
70.7	-32.0435	-9.46045	21.6675	62.2559	115.051	178.528	252.686	332.947	415.955	510.254	608.215
70.8	-31.7383	-9.76562	21.9727	62.561	115.356	178.528	252.38	332.031	415.649	509.644	607.91
70.9	-31.4331	-9.76562	22.2778	62.8662	115.356	178.223	251.77	331.116	415.344	509.033	607.3
71	-31.4331	-9.76562	21.9727	63.7817	115.356	177.612	251.77	330.811	415.649	508.423	606.689
71.1	-31.4331	-9.46045	21.6675	64.0869	115.967	177.307	252.38	330.505	415.649	508.423	606.689
71.2	-31.7383	-8.8501	21.3623	64.3921	115.662	177.307	252.686	330.505	415.955	508.423	606.995
71.3	-32.0435	-8.54492	21.3623	64.6973	115.662	178.223	252.686	330.505	416.26	508.423	607.605
71.4	-32.0435	-8.54492	21.9727	64.6973	115.967	179.138	252.075	330.811	415.955	507.812	608.215
71.5	-32.0435	-8.54492	21.9727	64.0869	115.967	179.749	251.465	331.421	415.344	507.202	608.826
71.6	-31.7383	-8.54492	21.3623	64.0869	115.967	180.054	251.16	331.726	414.734	506.592	609.131
71.7	-31.7383	-8.8501	20.752	64.3921	115.356	180.054	250.854	331.726	414.124	505.676	608.521
71.8	-32.0435	-9.15527	20.752	64.6973	115.051	179.443	251.16	332.642	413.818	505.066	607.91
71.9	-32.3486	-8.54492	21.3623	64.3921	115.356	179.138	251.465	333.862	414.429	504.761	607.3
72	-32.959	-7.93457	22.2778	64.3921	115.356	178.833	252.075	335.083	415.039	504.761	606.995
72.1	-32.959	-7.32422	22.8882	64.3921	115.051	178.833	252.991	335.083	415.955	505.066	606.384
72.2	-32.6538	-7.62939	23.1934	64.6973	114.746	179.138	253.906	334.167	416.87	505.066	606.079
72.3	-32.3486	-7.62939	23.4985	65.3076	115.051	179.138	254.211	333.557	417.48	505.371	606.995
72.4	-32.0435	-7.62939	23.4985	65.3076	115.662	179.138	254.211	333.252	417.48	505.371	607.91
72.5	-32.0435	-7.93457	23.4985	65.3076	116.577	179.138	253.601	333.557	416.565	505.676	608.826
72.6	-32.0435	-8.23975	23.1934	65.0024	117.187	179.138	252.991	333.557	415.344	505.371	609.131
72.7	-32.0435	-8.23975	22.583	65.0024	117.493	178.833	252.38	333.252	414.429	505.371	608.215
72.8	-31.7383	-8.23975	22.2778	65.0024	117.187	178.528	251.465	332.642	413.818	505.676	606.995
72.9	-31.1279	-8.23975	22.583	64.6973	116.577	178.223	250.549	332.031	413.513	505.981	605.774
73	-30.8228	-8.23975	22.2778	64.3921	116.577	178.223	250.244	332.031	413.513	506.287	605.164
73.1	-30.5176	-7.62939	21.9727	64.3921	116.577	178.528	249.939	332.031	413.513	506.592	604.858
73.2	-30.2124	-7.32422	21.3623	64.3921	116.577	178.528	249.939	332.031	414.124	506.287	604.248
73.3	-29.9072	-7.32422	21.0571	64.6973	116.882	177.917	250.549	332.336	414.734	505.981	603.638
73.4	-29.9072	-7.93457	21.6675	65.0024	117.187	177.612	250.854	332.031	415.344	505.676	602.417
73.5	-30.5176	-8.54492	22.583	65.3076	117.187	177.917	250.854	331.421	415.344	505.676	600.586
73.6	-31.1279	-8.8501	23.1934	65.6128	116.882	178.223	250.854	331.116	415.039	505.676	599.365
73.7	-31.1279	-8.8501	23.8037	66.2231	116.577	178.833	250.854	330.505	415.039	505.676	599.06
73.8	-30.8228	-8.23975	23.8037	66.2231	116.272	178.833	250.854	329.895	415.344	505.676	599.976
73.9	-30.8228	-7.93457	23.8037	66.5283	115.662	178.833	250.549	329.895	415.649	506.287	601.196
74	-30.8228	-7.93457	24.1089	66.8335	115.967	178.528	249.939	329.895	415.649	506.592	602.417
74.1	-30.8228	-7.62939	24.4141	66.8335	116.272	177.917	249.634	329.59	415.955	506.897	603.027
74.2	-30.5176	-7.32422	24.7192	66.8335	116.882	177.612	249.939	329.59	416.565	506.897	603.943
74.3	-30.2124	-7.32422	24.7192	66.5283	117.493	177.612	250.854	329.895	416.87	506.897	605.164
74.4	-30.2124	-7.01904	24.7192	65.918	117.798	177.917	251.16	330.2	417.786	506.897	605.774
74.5	-30.2124	-7.32422	24.4141	65.918	117.798	178.528	251.16	330.2	418.701	506.897	605.164
74.6	-30.2124	-7.32422	23.8037	65.918	117.493	179.138	250.244	329.895	419.312	507.202	603.943
74.7	-30.2124	-7.32422	22.8882	65.918	117.187	180.054	249.939	329.285	419.617	507.202	602.417
74.8	-30.2124	-6.71387	22.2778	66.2231	117.493	180.664	249.329	328.979	420.227	507.202	601.196
74.9	-30.2124	-6.40869	21.9727	66.5283	117.493	181.274	249.329	328.369	420.532	507.202	601.501
75	-30.5176	-6.10352	22.2778	66.5283	117.493	180.969	249.634	327.759	420.532	506.897	602.112
75.1	-30.5176	-5.79834	22.8882	66.2231	117.798	180.054	250.854	327.454	420.227	506.592	603.027
75.2	-30.2124	-5.49316	23.8037	66.2231	117.798	179.138	252.38	326.843	419.617	505.981	603.333
75.3	-30.2124	-5.49316	24.1089	66.2231	117.798	178.528	252.991	326.843	418.701	505.371	603.333
75.4	-29.9072	-6.10352	24.4141	66.5283	117.798	178.223	252.686	326.843	417.786	505.371	603.027
75.5	-29.6021	-6.71387	24.4141	66.5283	117.187	178.223	252.075	327.454	416.87	505.371	603.027
75.6	-28.9917	-7.01904	24.1089	66.5283	117.187	178.223	251.465	328.064	415.955	505.066	602.722
75.7	-28.6865	-7.01904	23.8037	66.2231	116.882	178.223	251.465	328.979	415.344	504.761	602.417
75.8	-28.3813	-6.71387	23.8037	66.2231	117.187	178.223	251.465	329.59	414.734	504.761	602.112
75.9	-28.6865	-6.10352	24.1089	66.5283	117.187	178.833	251.465	329.59	414.124	504.456	601.807
76	-29.6021	-5.49316	24.7192	66.8335	117.187	179.443	251.16	328.979	413.818	503.845	600.891
76.1	-30.2124	-5.49316	25.3296	66.8335	117.187	180.054	251.465	328.369	413.818	503.235	599.365
76.2	-30.8228	-5.49316	25.3296	66.5283	117.187	179.749	251.16	328.369	413.513	502.93	597.534
76.3	-30.8228	-5.79834	25.3296	65.918	117.187	179.138	250.854	328.369	412.903	502.625	596.008
76.4	-30.8228	-6.10352	24.7192	65.918	117.798	178.528	250.244	328.674	412.598	502.625	595.398
76.5	-30.8228	-6.10352	24.4141	65.6128	118.103	178.528	249.939	328.674	411.987	502.625	595.093
76.6	-30.5176	-6.10352	24.1089	65.6128	118.408	178.528	249.329	328.674	411.682	502.319	594.788
76.7	-30.2124	-6.40869	23.4985	66.2231	118.103	178.223	249.329	328.674	411.072	501.709	594.482
76.8	-29.9072	-6.71387	23.1934	66.5283	117.493	178.223	249.634	328.674	410.767	501.404	594.177
76.9	-29.9072	-7.01904	23.1934	67.1387	116.577	178.223	249.634	328.979	410.767	501.404	594.177
77	-29.9072	-6.40869	23.4985	67.1387	116.272	177.612	249.634	329.285	410.461	501.709	593.567
77.1	-29.9072	-5.49316	24.1089	67.1387	116.272	177.612	249.634	329.895	410.461	502.625	593.262
77.2	-30.2124	-4.88281	24.7192	67.1387	116.882	177.612	249.634	331.116	410.156	503.845	592.957
77.3	-30.2124	-4.57764	25.3296	67.4438	117.493	177.917	249.634	332.031	409.851	504.761	592.651
77.4	-30.2124	-4.57764	25.0244	67.4438	118.103	177.917	249.939	332.947	409.851	505.676	592.041
77.5	-29.9072	-4.88281	24.7192	67.4438	118.408	177.917	250.244	333.557	409.851	505.981	591.431
77.6	-29.6021	-5.49316	24.7192	67.1387	118.408	177.612	250.244	333.557	409.851	505.981	591.431
77.7	-29.2969	-6.10352	25.0244	66.8335	118.103	177.002	249.939	333.557	409.546	505.676	591.736
77.8	-28.9917	-6.10352	25.3296	66.5283	117.798	176.086	249.634	333.557	408.63	505.371	592.346
77.9	-28.9917	-6.10352	25.6348	66.2231	118.103	175.476	249.023	332.642	408.02	505.371	593.872
78	-29.6021	-6.10352	25.3296	65.918	118.103	175.476	249.023	331.726	408.325	504.761	595.093
78.1	-29.9072	-6.40869	25.3296	65.918	118.103	176.086	249.329	330.505	408.63	503.845	596.008
78.2	-30.2124	-6.71387	25.0244	65.6128	118.408	177.002	249.939	329.59	409.241	502.93	596.008
78.3	-30.2124	-6.10352	24.7192	65.3076	118.713	177.307	250.854	328.979	409.546	502.319	596.008
78.4	-29.9072	-5.49316	24.4141	65.3076	118.713	177.612	251.465	328.979	409.241	502.014	596.008
78.5	-29.6021	-5.18799	24.1089	65.3076	118.408	177.612	251.465	329.285	408.325	502.625	594.788
78.6	-29.9072	-5.49316	24.4141	65.3076	118.103	178.223	251.16	329.895	408.02	502.93	593.567
78.7	-30.2124	-6.10352	25.0244	65.0024	117.798	178.833	250.854	330.2	408.63	502.93	592.651
78.8	-30.2124	-6.40869	24.7192	65.3076	117.798	179.138	250.854	330.2	409.241	502.625	592.041
78.9	-29.9072	-6.10352	24.4141	65.6128	118.408	179.138	250.854	330.811	409.241	501.709	591.736
79	-29.2969	-5.49316	24.1089	65.918	118.713	178.528	250.854	330.505	408.936	501.099	591.431
79.1	-28.9917	-4.57764	24.4141	66.2231	118.713	178.223	251.16	329.895	408.63	499.878	590.82
79.2	-28.6865	-3.66211	25.0244	66.5283	118.408	178.528	250.549	329.59	408.325	499.268	590.82
79.3	-28.3813	-3.66211	25.6348	66.5283	118.103	178.223	249.939	329.59	408.02	498.962	591.125
79.4	-28.0762	-3.96729	26.2451	66.5283	118.103	177.612	249.634	330.2	407.104	498.962	591.125
79.5	-28.3813	-4.88281	26.2451	66.5283	118.408	177.307	249.329	331.116	406.799	498.657	590.82
79.6	-28.6865	-5.49316	25.9399	66.8335	118.408	177.612	249.634	332.031	406.494	498.047	590.82
79.7	-28.6865	-5.79834	25.6348	66.5283	118.103	177.917	249.634	332.642	406.799	497.742	590.21
79.8	-28.6865	-5.79834	25.3296	66.2231	117.493	178.223	249.939	332.642	407.41	497.742	589.6
79.9	-28.6865	-5.49316	24.4141	65.918	117.493	178.223	250.244	332.642	408.02	498.047	589.294
80	-28.9917	-4.88281	23.4985	65.918	117.493	178.528	250.549	332.642	408.936	497.742	588.684
80.1	-28.9917	-4.57764	22.8882	66.2231	117.187	178.833	250.854	332.642	409.546	497.437	587.769
80.2	-28.9917	-4.57764	22.583	66.2231	116.882	179.749	251.16	332.947	410.156	497.131	587.158
80.3	-29.2969	-4.57764	22.8882	66.5283	116.577	180.054	250.854	333.252	410.461	497.131	587.463
80.4	-29.6021	-4.57764	23.1934	66.2231	116.577	180.359	249.939	333.557	410.767	497.131	587.769
80.5	-29.6021	-4.88281	24.1089	66.2231	116.577	180.664	249.634	333.252	411.072	497.437	587.769
80.6	-28.9917	-5.49316	25.0244	66.5283	116.272	180.359	249.634	332.642	411.072	498.352	587.158
80.7	-28.3813	-5.49316	25.9399	67.1387	116.272	179.443	250.244	331.726	411.377	498.657	586.548
80.8	-28.6865	-5.18799	25.9399	67.1387	116.577	178.528	250.549	330.505	411.377	498.657	586.243
80.9	-29.2969	-4.88281	25.6348	66.8335	116.882	177.917	250.244	329.895	411.377	498.657	586.243
81	-29.6021	-4.88281	25.3296	66.2231	116.882	177.917	249.939	329.285	411.377	498.962	586.548
81.1	-29.2969	-5.49316	24.7192	65.3076	117.493	177.917	249.939	329.285	410.767	499.573	586.853
81.2	-29.6021	-5.79834	24.4141	65.0024	117.798	178.528	250.244	329.285	410.461	500.793	587.463
81.3	-29.6021	-5.79834	24.1089	65.3076	117.798	178.833	250.244	329.59	410.461	501.709	588.074
81.4	-29.6021	-5.79834	23.8037	66.2231	117.493	178.833	249.939	329.285	410.461	501.709	588.379
81.5	-29.6021	-5.79834	23.8037	66.8335	116.882	178.833	249.939	328.674	410.767	501.099	588.074
81.6	-29.9072	-5.49316	23.1934	66.8335	116.882	179.138	250.244	328.369	410.767	499.878	587.158
81.7	-29.9072	-4.88281	22.8882	66.8335	117.493	179.138	250.244	328.064	411.072	498.962	585.937
81.8	-29.6021	-3.96729	22.8882	67.1387	118.103	179.443	250.549	328.064	411.377	498.657	584.717
81.9	-28.9917	-3.66211	23.1934	66.8335	118.103	180.054	250.549	328.369	411.377	498.657	584.106
82	-28.6865	-3.96729	23.1934	66.5283	118.103	180.359	249.939	328.369	410.767	498.657	583.801
82.1	-28.9917	-4.27246	23.4985	66.2231	117.798	180.359	248.718	328.369	409.851	498.047	583.496
82.2	-29.2969	-4.57764	24.1089	66.2231	117.493	180.054	248.108	328.369	408.936	497.742	583.191
82.3	-29.6021	-4.88281	25.0244	66.8335	117.187	179.749	247.803	328.674	408.02	497.437	582.886
82.4	-29.6021	-4.88281	25.3296	67.1387	117.187	179.443	247.803	328.979	407.104	497.437	582.581
82.5	-29.6021	-4.88281	25.3296	67.4438	117.798	179.138	248.108	329.285	406.799	497.742	582.581
82.6	-29.2969	-4.57764	25.3296	67.4438	117.798	179.138	248.108	329.285	406.799	497.742	582.581
82.7	-29.6021	-4.57764	25.3296	67.1387	117.798	179.443	248.413	329.59	407.41	497.742	582.275
82.8	-29.9072	-4.88281	25.6348	67.4438	117.493	179.443	248.718	329.895	408.325	497.437	582.275
82.9	-29.9072	-4.88281	25.6348	67.4438	117.493	179.443	249.634	330.505	408.936	496.826	582.275
83	-29.6021	-4.57764	25.6348	67.749	117.493	179.443	250.549	330.811	409.546	496.216	581.97
83.1	-28.9917	-3.96729	25.6348	67.4438	117.187	179.443	251.16	331.421	409.851	495.911	581.665
83.2	-28.9917	-4.27246	25.3296	67.1387	117.187	180.054	251.77	331.726	410.461	496.216	581.36
83.3	-28.6865	-4.57764	25.3296	66.5283	117.187	180.664	252.075	331.421	410.767	496.521	581.055
83.4	-28.6865	-5.18799	25.3296	66.2231	117.187	180.969	252.38	330.2	410.767	496.826	580.444
83.5	-28.9917	-5.18799	24.7192	66.8335	117.187	181.274	252.686	328.674	410.461	496.521	579.834
83.6	-28.6865	-4.57764	24.4141	67.4438	117.187	181.274	252.38	327.759	409.546	496.216	579.529
83.7	-28.6865	-4.27246	24.4141	68.0542	116.882	181.274	251.77	327.454	408.936	495.911	579.224
83.8	-28.6865	-4.27246	24.4141	68.3594	116.882	180.969	251.465	327.454	408.936	495.911	579.834
83.9	-28.9917	-4.88281	24.1089	68.0542	116.272	180.664	250.854	327.148	409.546	495.605	580.75
84	-29.2969	-5.18799	24.1089	67.749	116.272	180.359	249.939	326.843	411.072	495.605	581.36
84.1	-29.6021	-5.18799	24.4141	67.1387	116.272	179.749	249.329	326.843	412.598	495.605	582.275
84.2	-29.6021	-4.88281	24.7192	66.8335	116.272	179.443	248.718	327.148	414.124	495.3	582.581
84.3	-29.2969	-4.88281	25.0244	66.8335	116.272	179.138	248.413	327.454	414.429	494.995	582.581
84.4	-28.9917	-5.18799	25.6348	67.1387	116.577	179.138	248.413	327.454	413.818	494.385	582.886
84.5	-28.6865	-5.18799	25.6348	67.1387	116.882	179.443	248.108	327.454	412.598	493.774	583.191
84.6	-28.6865	-5.18799	25.9399	67.1387	116.882	180.054	248.413	327.759	411.682	493.469	583.496
84.7	-28.6865	-5.18799	25.9399	67.4438	117.187	180.359	248.413	328.369	411.072	493.164	583.496
84.8	-28.3813	-4.88281	26.2451	67.749	117.493	180.054	248.413	328.979	411.072	492.859	583.496
84.9	-28.3813	-4.27246	25.9399	68.0542	117.493	179.443	248.108	329.59	410.461	493.164	583.191
85	-28.6865	-4.27246	25.9399	67.749	117.493	178.833	248.108	330.2	409.851	493.164	583.191
85.1	-28.6865	-4.27246	25.3296	67.4438	117.187	178.223	248.413	330.811	409.546	493.164	583.191
85.2	-28.3813	-4.88281	25.3296	67.1387	117.187	177.612	248.413	330.811	410.156	492.859	582.581
85.3	-28.3813	-5.18799	24.7192	66.5283	117.493	177.307	248.718	330.811	411.072	492.554	581.97
85.4	-28.9917	-5.49316	24.7192	66.8335	117.798	177.002	248.718	330.811	411.987	491.638	581.97
85.5	-28.9917	-5.18799	25.0244	66.8335	118.408	177.002	248.718	331.116	411.987	490.723	581.97
85.6	-29.2969	-4.27246	25.3296	66.2231	118.713	177.002	248.718	331.421	411.682	490.417	581.97
85.7	-29.2969	-3.66211	26.2451	65.6128	118.713	177.002	249.023	331.421	411.072	490.417	581.97
85.8	-29.2969	-3.35693	26.8555	65.3076	118.408	176.697	249.329	331.421	410.461	490.417	582.275
85.9	-29.2969	-3.66211	26.8555	65.6128	118.103	176.697	249.329	331.726	409.546	491.028	582.275
86	-28.6865	-4.27246	26.8555	65.918	118.103	176.697	249.634	332.031	408.63	491.333	582.581
86.1	-28.3813	-4.57764	26.2451	66.2231	118.103	176.697	249.939	331.421	408.02	491.943	582.886
86.2	-28.3813	-4.88281	25.9399	66.8335	117.798	176.697	249.939	330.505	408.02	492.249	582.886
86.3	-28.6865	-5.18799	25.6348	67.1387	117.493	177.002	249.939	329.895	408.63	492.249	582.581
86.4	-28.6865	-5.49316	25.6348	67.749	117.798	177.307	249.939	329.59	409.241	492.249	582.275
86.5	-28.6865	-5.18799	26.5503	68.0542	117.798	177.612	250.244	329.285	409.241	491.943	581.665
86.6	-28.6865	-4.88281	27.1606	67.749	118.103	177.917	250.549	328.979	409.241	492.249	580.75
86.7	-28.6865	-4.88281	27.4658	67.1387	118.103	178.223	250.244	328.674	409.241	492.249	579.834
86.8	-28.3813	-5.18799	27.4658	66.5283	118.713	178.833	250.244	328.369	409.241	491.943	578.613
86.9	-28.3813	-5.18799	26.8555	66.5283	119.019	178.833	249.939	327.759	408.936	491.943	577.698
87	-28.6865	-5.49316	26.2451	66.8335	119.019	178.833	249.939	327.148	408.936	491.638	577.698
87.1	-28.6865	-5.49316	25.6348	67.4438	119.019	178.833	249.634	326.843	408.63	491.638	578.613
87.2	-28.6865	-5.79834	25.9399	67.749	118.713	178.528	249.939	326.843	408.325	491.943	579.529
87.3	-28.3813	-6.10352	26.2451	67.749	118.713	178.833	250.549	327.454	407.715	492.249	579.529
87.4	-28.3813	-5.79834	26.5503	68.0542	118.408	178.833	251.77	327.454	408.02	492.249	579.529
87.5	-28.3813	-5.18799	26.5503	68.3594	117.798	178.833	252.38	328.064	408.63	491.638	579.224
87.6	-28.3813	-4.88281	26.2451	68.0542	117.187	178.833	252.38	328.369	408.936	491.028	579.224
87.7	-28.3813	-4.27246	26.2451	67.4438	116.577	178.528	252.075	328.979	408.63	490.417	578.918
87.8	-27.771	-4.27246	26.2451	66.8335	116.272	178.528	252.075	329.59	408.63	489.502	578.308
87.9	-27.771	-4.88281	26.2451	66.2231	115.662	179.138	252.075	330.505	408.63	489.197	578.308
88	-27.771	-5.18799	25.9399	65.918	115.662	179.443	252.075	331.726	408.936	489.197	578.918
88.1	-27.771	-5.79834	25.3296	65.3076	115.967	179.749	252.38	332.642	409.241	489.502	579.834
88.2	-27.771	-5.79834	24.7192	65.0024	116.577	180.054	252.38	332.642	409.851	489.807	581.055
88.3	-27.771	-5.49316	24.4141	65.6128	117.187	180.359	252.075	332.031	410.156	490.112	581.665
88.4	-27.4658	-5.18799	24.7192	66.2231	117.493	180.359	251.465	331.116	410.156	489.502	581.36
88.5	-27.1606	-5.18799	25.3296	66.8335	117.798	179.749	251.465	330.505	409.851	489.197	581.055
88.6	-27.771	-4.88281	25.9399	66.8335	117.493	179.138	251.465	330.2	409.241	489.197	581.055
88.7	-28.3813	-4.88281	26.5503	66.8335	117.187	178.528	251.465	330.2	408.936	489.197	581.665
88.8	-28.3813	-5.18799	27.1606	66.5283	117.493	178.528	251.77	329.895	408.325	489.502	582.581
88.9	-28.3813	-5.18799	27.771	66.5283	118.408	179.138	251.77	329.895	407.715	489.197	583.496
89	-28.0762	-5.18799	28.3813	66.2231	119.629	179.749	251.465	329.59	407.41	489.197	583.801
89.1	-27.771	-4.88281	28.3813	65.918	120.239	180.054	251.16	329.59	407.104	489.502	583.801
89.2	-27.4658	-4.57764	28.0762	65.918	119.934	180.359	250.854	330.2	406.799	489.807	583.191
89.3	-27.4658	-4.27246	27.771	66.2231	119.019	180.359	251.16	330.811	406.189	490.112	582.275
89.4	-27.771	-3.96729	27.4658	66.8335	118.408	180.359	251.77	330.811	405.579	489.807	581.665
89.5	-28.3813	-3.96729	26.8555	67.1387	117.798	180.664	252.686	330.2	404.968	489.502	581.665
89.6	-28.6865	-3.96729	26.5503	67.1387	117.493	180.969	253.296	328.979	404.053	489.197	581.665
89.7	-28.3813	-3.96729	26.5503	66.8335	117.798	180.969	253.601	328.064	403.748	489.502	581.97
89.8	-28.3813	-3.66211	26.5503	66.5283	118.103	180.359	253.601	327.759	403.748	489.502	581.665
89.9	-28.0762	-3.35693	26.2451	66.2231	118.713	180.054	253.601	327.759	403.748	489.807	581.36
90	-27.771	-3.35693	26.2451	66.5283	119.019	180.054	253.296	328.064	403.748	489.502	581.055
90.1	-28.0762	-3.35693	26.2451	66.5283	119.629	179.749	252.686	328.369	403.748	488.892	581.36
90.2	-28.3813	-3.35693	26.5503	66.8335	119.934	179.443	252.686	329.285	403.442	488.281	581.36
90.3	-28.3813	-3.35693	26.8555	66.8335	119.934	179.138	252.38	329.895	402.832	487.976	581.36
90.4	-28.0762	-3.66211	26.8555	67.4438	119.324	179.138	252.38	330.2	403.137	488.281	581.055
90.5	-28.0762	-3.96729	27.1606	67.749	118.408	179.443	252.38	330.505	403.748	488.586	580.139
90.6	-28.0762	-3.66211	27.1606	68.0542	117.798	179.443	252.075	330.2	404.968	489.197	579.224
90.7	-28.0762	-3.66211	27.4658	67.749	117.493	179.443	251.77	329.59	406.494	489.502	578.918
90.8	-28.3813	-3.66211	27.4658	67.4438	117.493	179.443	251.465	329.285	407.715	489.807	578.918
90.9	-28.3813	-3.96729	27.1606	66.8335	118.103	179.443	251.77	329.59	408.936	489.807	579.834
91	-28.0762	-4.27246	26.8555	66.8335	118.408	179.749	251.77	330.2	409.241	489.807	581.055
91.1	-28.0762	-3.96729	26.5503	66.5283	119.019	180.054	251.77	330.811	409.241	489.807	582.275
91.2	-28.6865	-3.66211	26.2451	66.5283	119.019	180.359	251.77	331.116	408.936	489.807	583.496
91.3	-28.9917	-3.35693	26.5503	66.2231	119.019	180.359	251.77	330.811	408.02	489.197	584.106
91.4	-29.2969	-3.35693	26.8555	66.2231	118.713	180.359	252.075	330.2	407.41	488.892	584.412
91.5	-28.9917	-3.35693	27.1606	66.2231	118.408	180.054	252.075	329.59	406.799	488.586	584.717
91.6	-28.0762	-3.66211	26.8555	66.5283	118.103	180.359	252.38	328.979	406.799	488.281	584.412
91.7	-27.771	-4.27246	26.2451	66.8335	118.408	180.054	252.991	328.674	406.494	488.281	584.717
91.8	-27.771	-4.57764	26.2451	67.1387	118.713	179.749	253.601	328.979	405.579	488.281	585.327
91.9	-28.0762	-4.88281	26.5503	67.1387	119.019	179.138	253.906	328.979	404.663	489.197	585.937
92	-28.3813	-4.88281	26.8555	66.8335	119.019	178.833	253.906	328.674	403.442	489.807	585.937
92.1	-28.3813	-4.57764	26.5503	66.8335	119.019	178.833	253.906	328.369	402.222	490.112	585.327
92.2	-27.771	-4.27246	26.2451	66.5283	119.629	178.833	253.296	327.454	401.306	489.807	584.717
92.3	-27.771	-3.96729	25.6348	66.8335	120.239	178.833	252.686	326.843	400.696	488.586	583.496
92.4	-27.4658	-4.27246	25.6348	66.8335	120.544	179.138	252.075	326.843	400.696	487.671	582.581
92.5	-27.771	-4.27246	25.6348	67.1387	120.239	179.443	251.77	327.148	401.001	486.755	582.275
92.6	-27.771	-4.57764	26.2451	67.1387	119.324	179.749	252.075	327.148	401.611	486.45	582.275
92.7	-27.4658	-4.88281	26.5503	67.1387	119.019	180.359	252.686	327.148	402.527	486.45	583.191
92.8	-27.771	-5.18799	27.1606	67.1387	119.019	180.359	253.601	327.148	403.137	486.755	584.106
92.9	-27.4658	-5.18799	27.1606	66.8335	119.019	180.054	254.211	327.148	403.137	487.061	584.717
93	-27.1606	-4.88281	26.8555	66.8335	119.019	179.443	255.127	326.843	403.137	487.366	585.022
93.1	-26.8555	-4.57764	26.8555	66.5283	118.713	179.138	255.432	326.233	403.442	487.061	584.717
93.2	-26.5503	-4.57764	26.5503	66.2231	118.103	179.443	255.432	325.928	403.748	486.755	584.412
93.3	-26.8555	-3.96729	26.2451	66.2231	117.493	179.443	255.127	325.317	404.053	486.755	584.412
93.4	-27.4658	-3.96729	26.2451	66.5283	117.187	179.749	254.211	324.707	404.053	487.061	584.412
93.5	-28.0762	-3.96729	26.2451	66.8335	117.187	179.749	253.296	324.402	404.358	487.366	585.022
93.6	-28.0762	-3.35693	26.2451	67.1387	117.493	179.749	252.686	324.097	405.273	487.671	585.327
93.7	-27.771	-3.05176	25.6348	67.4438	117.798	180.054	251.77	324.402	406.494	487.976	585.327
93.8	-27.4658	-2.74658	25.3296	67.4438	118.103	180.359	251.77	324.707	407.41	488.586	585.327
93.9	-26.8555	-2.44141	25.6348	67.749	118.408	180.969	251.77	325.317	407.715	489.197	585.937
94	-26.8555	-2.74658	26.5503	67.4438	118.408	181.274	251.77	325.623	408.02	489.502	586.548
94.1	-27.1606	-3.35693	27.1606	67.749	118.103	181.274	252.38	325.623	408.02	490.112	586.853
94.2	-27.771	-3.66211	27.4658	67.749	117.798	180.969	252.991	325.928	407.715	490.723	586.853
94.3	-27.771	-3.96729	27.1606	67.749	117.187	180.359	253.296	326.538	407.715	491.028	586.853
94.4	-27.771	-3.96729	26.8555	67.749	116.882	180.054	253.296	327.454	408.02	491.028	587.158
94.5	-28.0762	-4.27246	26.8555	67.4438	116.882	180.054	252.686	328.064	408.325	490.723	587.463
94.6	-28.3813	-3.96729	26.8555	67.4438	117.187	180.054	252.38	328.674	408.63	490.417	587.158
94.7	-28.3813	-3.66211	27.1606	67.4438	117.493	179.749	252.38	329.285	408.936	490.417	586.548
94.8	-28.3813	-3.35693	26.8555	67.1387	117.798	179.138	252.075	329.285	408.936	491.028	585.937
94.9	-28.0762	-3.05176	26.5503	66.8335	117.798	178.833	251.465	329.285	408.325	491.943	585.022
95	-28.0762	-2.74658	26.2451	66.5283	118.103	178.223	250.854	328.979	407.715	493.164	584.106
95.1	-28.0762	-3.05176	26.2451	66.8335	118.103	178.223	250.549	328.369	407.41	493.774	583.191
95.2	-27.771	-3.96729	26.2451	67.1387	118.408	178.528	250.549	327.148	407.104	494.08	582.581
95.3	-27.4658	-4.27246	25.9399	67.4438	118.103	179.138	250.244	325.623	407.41	494.08	582.275
95.4	-27.4658	-3.96729	25.9399	67.1387	118.103	179.443	250.244	324.707	407.41	493.469	582.581
95.5	-27.771	-3.96729	26.2451	66.8335	117.798	179.443	250.244	324.707	407.104	493.164	582.581
95.6	-27.771	-3.66211	26.2451	66.8335	117.493	179.138	250.549	325.012	406.189	493.164	581.97
95.7	-27.4658	-3.66211	26.5503	67.4438	117.493	178.833	251.16	325.317	405.579	493.469	581.665
95.8	-26.8555	-3.66211	26.5503	67.749	117.493	178.833	251.465	325.623	405.579	494.08	581.055
95.9	-26.8555	-3.66211	26.8555	67.4438	117.493	179.138	251.16	325.623	405.273	494.69	580.75
96	-26.8555	-3.66211	26.8555	67.1387	118.103	179.138	250.549	325.623	405.273	494.995	580.139
96.1	-26.8555	-3.35693	26.8555	66.8335	118.408	178.528	250.244	325.317	404.968	495.605	580.139
96.2	-26.8555	-3.05176	26.8555	67.1387	118.408	177.917	250.244	325.317	404.358	495.605	580.444
96.3	-26.8555	-3.35693	26.5503	67.4438	118.103	177.307	250.244	325.317	404.053	495.605	580.75
96.4	-26.8555	-3.35693	26.8555	67.4438	118.103	177.002	249.939	325.317	404.053	495.605	581.665
96.5	-27.1606	-3.66211	26.5503	67.1387	117.798	176.697	249.939	325.317	404.053	495.605	582.581
96.6	-27.1606	-3.35693	25.9399	67.4438	117.187	176.697	249.939	325.012	404.053	496.216	582.886
96.7	-27.1606	-3.96729	25.0244	67.749	117.187	176.697	250.244	324.707	404.053	496.521	582.886
96.8	-27.1606	-4.57764	25.3296	68.0542	117.187	177.307	250.549	324.707	404.663	496.521	582.275
96.9	-27.4658	-5.18799	25.6348	67.4438	117.493	177.917	250.549	324.402	405.884	495.911	581.665
97	-28.0762	-5.79834	26.2451	66.8335	117.798	178.833	250.549	324.097	406.189	494.995	580.75
97.1	-28.0762	-5.49316	26.8555	66.5283	117.493	179.443	250.549	323.792	406.189	493.469	580.139
97.2	-27.771	-5.18799	27.4658	66.5283	117.798	179.749	250.549	323.792	405.273	492.249	579.224
97.3	-27.4658	-4.57764	27.1606	66.8335	118.103	179.443	250.549	323.792	404.663	491.028	578.918
97.4	-26.8555	-4.27246	27.1606	67.1387	118.103	178.528	250.854	323.792	404.968	490.417	579.224
97.5	-26.8555	-3.66211	26.8555	67.4438	117.493	178.223	251.16	323.486	405.579	489.807	579.834
97.6	-26.8555	-3.35693	26.5503	67.749	116.882	178.223	251.465	323.486	405.884	489.197	580.139
97.7	-26.5503	-3.05176	25.9399	68.0542	116.882	178.223	252.075	323.486	405.884	488.892	580.444
97.8	-26.5503	-3.05176	25.0244	68.3594	117.187	178.223	252.686	323.486	405.579	488.586	580.75
97.9	-26.5503	-3.35693	24.7192	68.0542	117.798	178.223	253.296	323.792	405.579	488.892	581.36
98	-26.5503	-3.66211	24.7192	67.4438	118.713	177.917	253.906	324.097	405.273	488.892	581.055
98.1	-26.5503	-3.66211	25.0244	66.5283	119.324	177.917	253.906	324.402	405.273	489.502	581.055
98.2	-27.1606	-3.35693	25.6348	65.918	119.629	178.528	253.601	324.402	405.273	490.112	581.665
98.3	-27.771	-3.05176	25.3296	65.918	119.019	179.443	253.296	324.402	405.273	491.028	582.581
98.4	-28.0762	-3.05176	25.0244	66.2231	118.408	180.359	252.991	324.402	405.273	491.333	583.801
98.5	-28.0762	-3.35693	24.1089	66.8335	117.493	180.969	252.686	324.707	405.579	491.638	584.717
98.6	-28.0762	-3.66211	23.8037	67.1387	117.493	180.969	252.686	325.623	405.884	491.943	584.717
98.7	-28.0762	-3.96729	24.1089	67.1387	117.798	180.054	252.686	326.843	406.494	492.554	584.717
98.8	-27.771	-3.66211	24.7192	67.4438	119.019	178.833	252.686	327.454	407.41	493.164	584.106
98.9	-27.771	-3.05176	25.3296	67.4438	119.934	178.528	252.075	327.759	408.325	493.774	584.106
99	-27.771	-2.74658	25.6348	67.1387	120.544	178.223	251.465	327.148	409.241	493.774	584.106
99.1	-27.4658	-2.74658	25.9399	66.8335	120.85	178.223	250.854	326.538	410.156	493.774	583.801
99.2	-27.1606	-3.05176	25.9399	66.5283	120.544	178.528	250.244	325.928	410.461	493.164	583.496
99.3	-26.8555	-3.66211	25.9399	66.8335	119.934	179.138	249.939	325.623	410.156	491.943	583.496
99.4	-26.8555	-4.27246	26.2451	67.4438	119.019	179.443	250.244	325.623	409.851	491.028	583.801
99.5	-26.8555	-4.27246	26.5503	67.4438	118.103	179.749	250.549	325.623	409.546	490.417	584.106
99.6	-26.8555	-3.96729	26.2451	67.4438	117.798	180.054	250.854	326.233	409.851	489.502	584.717
99.7	-26.5503	-4.27246	26.2451	67.749	118.103	179.749	250.549	327.148	410.156	489.502	585.022
99.8	-26.5503	-4.57764	26.2451	68.0542	119.019	179.138	249.939	328.674	410.156	489.807	585.022
99.9	-26.8555	-4.27246	26.5503	68.3594	119.629	178.528	249.634	329.285	409.241	490.417	584.717
100	-26.8555	-3.96729	26.5503	68.6646	119.934	177.917	249.939	328.979	408.325	491.333	584.412
100.1	-26.8555	-3.96729	26.5503	68.3594	119.324	177.307	250.549	328.369	407.41	491.638	584.106
100.2	-26.5503	-3.96729	26.2451	68.0542	118.408	177.307	250.854	327.759	406.799	491.028	584.106
100.3	-26.5503	-3.96729	25.9399	67.4438	117.493	177.307	251.16	327.148	405.884	490.112	584.106
100.4	-26.8555	-3.66211	25.3296	66.8335	117.493	177.612	250.854	326.843	405.273	489.197	585.022
100.5	-27.4658	-3.96729	25.0244	66.5283	117.493	178.223	250.549	326.843	404.663	488.892	586.243
100.6	-27.771	-3.96729	24.7192	66.2231	117.187	178.528	249.634	327.148	405.273	488.892	587.158
100.7	-28.0762	-4.27246	24.7192	65.918	116.882	178.833	248.718	327.759	405.884	489.502	587.158
100.8	-28.3813	-4.27246	25.0244	65.6128	116.882	178.833	247.803	327.759	407.104	490.417	586.243
100.9	-28.3813	-3.66211	24.7192	65.918	117.187	178.833	247.498	327.148	408.02	491.638	584.717
101	-28.3813	-3.35693	24.7192	66.2231	117.493	179.138	248.108	326.843	408.325	491.943	582.886
101.1	-28.0762	-3.05176	24.4141	66.5283	117.493	179.138	248.413	326.843	408.325	491.943	581.36
101.2	-27.771	-2.44141	24.1089	66.8335	117.187	179.749	248.718	327.148	407.41	492.249	580.139
101.3	-27.771	-2.44141	24.1089	67.1387	117.187	180.664	249.023	326.843	406.799	492.249	579.834
101.4	-28.0762	-2.74658	24.1089	67.749	117.493	181.58	249.634	326.538	406.494	492.554	579.834
101.5	-28.0762	-3.96729	24.4141	67.749	117.798	181.885	250.244	325.928	406.189	492.859	580.139
101.6	-28.0762	-4.88281	25.0244	68.0542	117.798	181.885	250.854	325.317	406.494	492.859	580.139
101.7	-27.771	-5.49316	25.6348	68.3594	117.493	180.969	251.16	325.317	406.494	492.249	580.444
101.8	-27.1606	-5.18799	25.9399	68.3594	117.187	180.359	251.465	325.317	406.494	491.638	580.75
101.9	-27.4658	-4.27246	26.2451	68.3594	116.882	179.443	251.465	325.623	405.884	491.333	581.36
102	-27.771	-3.66211	26.5503	68.0542	116.882	178.833	251.465	325.623	404.663	491.028	582.581
102.1	-28.0762	-3.05176	26.5503	68.3594	117.187	178.528	251.465	325.317	404.053	491.028	583.191
102.2	-28.0762	-3.05176	26.2451	68.3594	118.103	178.528	251.16	325.317	403.748	491.333	582.886
102.3	-28.0762	-3.35693	25.6348	68.3594	118.713	178.223	251.465	325.317	403.442	491.333	582.581
102.4	-28.0762	-3.66211	25.3296	68.0542	119.019	177.917	251.77	325.623	403.442	491.333	582.275
102.5	-28.0762	-3.96729	25.0244	67.1387	118.713	177.917	252.38	325.928	404.053	491.028	581.665
102.6	-28.0762	-3.96729	25.3296	66.8335	118.408	177.917	252.991	326.538	404.663	491.028	581.36
102.7	-28.3813	-3.66211	25.6348	67.1387	118.103	177.917	253.296	327.454	405.884	491.333	581.055
102.8	-28.3813	-3.66211	26.2451	67.749	118.103	177.612	253.296	327.759	407.104	491.943	580.444
102.9	-28.3813	-3.66211	26.8555	68.3594	118.103	177.307	252.38	327.759	407.41	492.554	579.529
103	-27.771	-3.66211	26.8555	68.3594	118.103	177.307	251.465	327.759	407.104	492.554	578.918
103.1	-27.4658	-3.96729	26.8555	68.3594	118.408	177.917	251.16	327.759	406.494	492.859	578.613
103.2	-27.1606	-3.96729	26.8555	67.749	118.408	177.917	251.16	328.064	406.189	492.859	578.003
103.3	-26.5503	-3.35693	26.5503	67.4438	118.103	177.612	251.16	327.759	406.189	492.554	577.393
103.4	-26.8555	-2.74658	26.2451	67.1387	118.103	177.917	250.854	327.148	406.189	491.943	576.782
103.5	-27.4658	-2.74658	26.2451	67.1387	118.103	177.917	250.549	327.148	405.884	491.028	576.477
103.6	-28.0762	-3.05176	26.2451	67.1387	118.103	177.612	250.854	327.148	405.884	490.417	576.172
103.7	-28.3813	-3.35693	25.9399	66.8335	118.408	177.002	251.77	327.454	405.579	490.112	576.172
103.8	-28.3813	-3.35693	25.6348	66.5283	119.019	176.392	252.38	327.148	405.273	490.112	576.477
103.9	-28.3813	-3.35693	25.9399	66.5283	119.629	176.392	252.38	326.538	404.053	491.028	576.477
104	-28.0762	-3.35693	26.5503	66.8335	119.324	176.392	251.77	325.317	403.442	492.554	576.477
104.1	-28.0762	-3.05176	26.8555	66.8335	119.324	176.697	251.16	324.097	403.748	494.385	575.867
104.2	-27.771	-3.35693	27.1606	67.1387	119.019	177.307	250.549	323.792	404.053	495.605	575.562
104.3	-27.771	-3.96729	26.8555	67.4438	118.713	177.612	249.634	324.402	404.358	495.911	575.256
104.4	-28.0762	-4.27246	26.5503	67.4438	118.408	177.612	249.634	325.012	404.663	495.911	575.256
104.5	-28.3813	-3.96729	25.9399	67.1387	117.798	177.917	250.244	325.317	404.968	495.911	575.867
104.6	-28.3813	-3.66211	25.3296	67.1387	116.882	178.528	250.854	325.623	404.663	496.521	577.087
104.7	-28.3813	-3.35693	25.3296	67.4438	116.882	178.528	251.16	325.623	404.358	496.826	578.003
104.8	-28.0762	-3.35693	25.3296	67.749	117.187	178.528	250.244	326.233	404.053	496.826	578.918
104.9	-28.0762	-3.05176	25.0244	68.3594	118.103	177.917	249.023	326.843	404.053	495.911	579.834
105	-28.0762	-3.66211	25.3296	68.6646	118.408	177.307	248.413	327.454	404.358	494.69	580.139
105.1	-28.0762	-4.57764	26.2451	68.0542	118.713	176.697	248.718	327.454	404.968	493.774	580.444
105.2	-28.6865	-5.18799	26.8555	67.749	118.408	177.002	249.329	327.454	404.968	492.859	580.75
105.3	-28.9917	-5.49316	26.8555	67.4438	117.798	177.917	250.244	327.759	404.358	492.249	581.36
105.4	-28.9917	-5.49316	26.5503	67.4438	117.798	178.223	250.854	328.064	403.442	491.943	581.97
105.5	-28.3813	-5.18799	26.5503	67.749	118.103	178.833	251.16	328.369	403.137	491.333	582.275
105.6	-27.4658	-4.57764	26.5503	67.749	118.103	178.833	251.465	328.369	404.053	490.112	582.275
105.7	-26.8555	-4.27246	26.5503	67.749	118.103	179.138	251.16	328.369	405.273	488.892	581.97
105.8	-26.8555	-4.27246	26.8555	67.4438	117.798	179.443	250.244	328.064	405.884	487.061	581.36
105.9	-27.4658	-4.57764	26.5503	67.4438	117.493	179.443	249.634	327.759	406.189	485.84	580.139
106	-28.0762	-4.88281	26.8555	67.749	117.493	179.443	249.634	327.759	406.189	485.229	579.224
106.1	-28.3813	-4.88281	27.1606	68.0542	117.493	179.443	249.634	327.148	405.579	485.229	578.918
106.2	-28.3813	-4.88281	27.1606	68.0542	117.798	179.443	249.939	326.233	404.968	485.84	578.918
106.3	-28.3813	-4.88281	26.8555	68.0542	118.713	179.138	249.939	325.623	404.053	487.366	578.613
106.4	-28.3813	-4.88281	25.9399	68.0542	119.019	179.138	249.634	325.012	403.442	489.197	578.003
106.5	-28.0762	-4.27246	25.6348	68.0542	119.324	179.443	249.329	324.402	403.137	491.028	577.698
106.6	-28.0762	-3.96729	25.6348	68.0542	119.629	179.443	248.718	324.402	402.832	492.249	577.087
106.7	-28.0762	-3.96729	26.2451	67.749	119.629	179.138	248.718	324.402	402.832	492.554	576.477
106.8	-28.3813	-3.96729	26.5503	67.749	119.629	178.833	248.718	324.097	402.832	491.943	576.477
106.9	-28.3813	-3.66211	26.2451	67.749	119.324	178.528	248.718	324.097	403.137	491.028	577.087
107	-28.3813	-3.35693	25.9399	68.0542	119.019	178.833	248.718	324.097	403.748	490.417	578.308
107.1	-28.3813	-2.74658	25.3296	68.3594	118.713	179.443	248.718	324.402	404.053	490.112	579.224
107.2	-28.0762	-2.44141	25.0244	68.3594	118.408	179.443	248.718	325.012	404.358	490.417	579.834
107.3	-27.771	-1.83105	24.7192	68.0542	118.408	179.138	248.718	325.623	404.358	490.417	580.139
107.4	-27.4658	-1.52588	25.0244	68.0542	118.103	178.528	249.329	326.538	404.053	490.112	580.444
107.5	-27.4658	-1.52588	25.9399	67.749	117.798	178.223	249.939	327.454	403.748	490.112	580.444
107.6	-27.1606	-1.52588	26.5503	67.4438	117.798	178.528	250.854	328.064	403.137	489.807	580.444
107.7	-27.4658	-2.13623	26.8555	66.8335	117.798	178.833	251.16	328.369	403.137	490.112	580.444
107.8	-28.0762	-3.05176	26.8555	66.5283	118.103	179.138	251.465	328.369	403.137	490.417	580.75
107.9	-28.6865	-4.27246	27.1606	66.5283	118.408	179.138	251.465	327.759	402.832	490.417	580.75
108	-28.6865	-4.88281	27.4658	66.5283	119.019	178.833	251.465	327.148	402.832	490.112	581.055
108.1	-28.6865	-4.88281	27.771	67.1387	119.934	179.138	251.16	326.538	403.137	489.502	581.97
108.2	-28.3813	-4.57764	27.4658	67.4438	120.544	179.443	250.549	326.233	403.442	488.586	582.886
108.3	-27.771	-3.96729	27.1606	67.4438	120.544	180.054	250.244	326.538	403.748	487.976	583.496
108.4	-27.1606	-3.35693	27.1606	67.1387	119.934	180.969	249.939	326.843	404.663	487.671	583.496
108.5	-26.5503	-3.05176	27.1606	66.5283	119.629	180.969	249.939	327.454	404.968	487.061	582.886
108.6	-25.9399	-3.35693	26.8555	66.8335	119.019	180.664	249.634	327.759	405.273	487.061	581.665
108.7	-25.9399	-3.66211	26.5503	67.749	118.713	180.359	249.939	327.759	405.273	486.45	580.75
108.8	-25.9399	-3.66211	25.9399	68.3594	118.408	180.359	250.244	327.148	405.579	486.45	580.444
108.9	-26.5503	-3.66211	25.6348	68.0542	118.713	180.054	250.244	326.538	405.579	486.755	580.139
109	-27.1606	-3.66211	25.6348	68.0542	118.713	180.054	250.244	325.623	405.579	487.366	579.834
109.1	-28.0762	-3.35693	25.6348	68.3594	119.019	179.749	250.244	324.707	404.968	487.976	578.918
109.2	-28.3813	-3.05176	25.6348	68.9697	119.019	179.443	250.549	324.402	404.053	489.197	578.003
109.3	-28.0762	-3.05176	25.9399	68.9697	119.019	179.138	250.854	324.402	403.442	490.112	577.698
109.4	-28.0762	-3.05176	26.2451	68.3594	118.713	179.443	250.854	325.012	403.137	490.417	578.003
109.5	-27.771	-3.35693	26.2451	68.0542	117.798	179.443	251.16	325.623	403.137	490.112	578.308
109.6	-27.4658	-3.96729	26.2451	67.1387	117.493	179.138	251.16	326.233	403.442	489.502	578.613
109.7	-26.8555	-4.27246	26.8555	66.5283	117.493	179.138	251.16	326.843	403.442	489.807	578.613
109.8	-26.5503	-4.57764	26.8555	66.5283	117.187	178.833	250.854	327.148	403.137	489.807	578.613
109.9	-26.8555	-4.27246	26.5503	66.8335	116.882	178.833	250.549	326.538	403.137	490.112	578.003
110	-26.8555	-3.96729	26.5503	67.1387	116.577	178.833	250.549	325.928	403.137	490.112	577.698
110.1	-26.5503	-3.35693	26.5503	66.8335	115.967	178.833	251.16	325.623	402.832	490.417	577.393
110.2	-26.5503	-3.05176	26.5503	66.5283	115.662	179.138	251.465	325.317	402.832	490.723	577.393
110.3	-26.8555	-3.05176	26.5503	66.5283	115.967	179.138	251.465	325.012	403.442	491.028	578.003
110.4	-27.1606	-3.35693	26.5503	66.5283	116.577	179.443	251.16	325.012	404.358	491.943	578.308
110.5	-27.4658	-3.35693	26.8555	66.5283	117.798	179.443	250.854	324.402	405.579	492.859	578.613
110.6	-27.771	-3.35693	27.4658	67.1387	118.713	179.443	250.854	323.486	406.189	494.08	579.224
110.7	-27.771	-3.05176	28.0762	67.749	119.019	179.138	251.465	322.266	406.494	494.995	579.529
110.8	-27.771	-2.44141	28.3813	68.3594	119.019	179.138	252.075	321.655	407.104	495.3	579.834
110.9	-27.4658	-1.83105	28.3813	68.3594	118.408	179.138	252.075	321.96	407.715	494.69	579.834
111	-27.1606	-1.83105	27.4658	67.749	118.103	179.443	252.075	322.876	408.63	493.164	580.139
111.1	-27.1606	-1.52588	26.2451	67.749	118.103	179.749	252.38	323.792	409.241	491.638	580.444
111.2	-27.4658	-1.83105	25.6348	68.0542	117.798	179.749	252.686	324.402	409.851	491.028	581.055
111.3	-27.771	-1.83105	25.3296	68.0542	117.798	180.054	252.991	324.402	410.461	490.417	581.36
111.4	-28.0762	-2.13623	25.3296	68.0542	117.798	180.359	252.686	324.402	411.072	490.112	581.055
111.5	-28.0762	-3.05176	25.3296	67.749	118.103	180.664	252.38	324.402	411.682	489.502	580.444
111.6	-27.771	-3.66211	25.0244	67.749	118.713	180.664	252.38	324.402	411.682	489.197	580.444
111.7	-27.4658	-3.66211	25.0244	67.749	119.019	180.359	251.77	325.012	410.767	489.197	580.75
111.8	-27.1606	-3.66211	25.3296	68.0542	119.019	179.443	251.16	325.317	409.851	489.502	580.444
111.9	-26.8555	-3.66211	25.6348	68.0542	117.798	178.833	250.244	325.623	408.63	489.502	579.224
112	-27.4658	-3.96729	26.2451	67.749	116.577	178.223	249.634	325.623	408.02	489.502	578.308
112.1	-27.771	-3.66211	26.5503	67.4438	115.662	178.223	249.634	325.928	407.715	489.502	578.003
112.2	-28.0762	-3.35693	26.8555	67.4438	115.662	178.528	249.329	326.233	407.104	489.502	578.308
112.3	-28.0762	-2.74658	27.1606	67.4438	116.272	178.833	249.023	326.538	406.494	489.807	578.003
112.4	-27.771	-2.74658	27.4658	67.4438	116.577	178.833	249.023	326.233	405.884	489.807	576.782
112.5	-27.4658	-3.05176	27.771	67.1387	117.187	178.833	249.023	325.928	404.968	490.112	575.562
112.6	-27.4658	-3.66211	27.4658	67.1387	117.493	178.528	248.413	325.623	404.053	490.723	574.341
112.7	-27.771	-3.96729	27.1606	66.8335	117.798	177.307	247.498	325.317	403.137	491.028	573.73
112.8	-28.0762	-3.66211	26.8555	66.5283	118.408	176.086	246.277	325.012	402.832	490.723	573.425
112.9	-28.3813	-3.66211	26.8555	66.8335	118.713	175.781	245.667	324.402	402.832	490.723	573.12
113	-28.3813	-3.35693	26.8555	66.8335	118.713	176.086	245.361	323.486	403.442	491.028	573.425
113.1	-28.3813	-3.35693	27.1606	66.8335	118.103	176.697	245.667	323.181	404.358	491.638	574.036
113.2	-27.771	-2.44141	27.1606	67.1387	117.187	176.697	246.277	322.876	404.663	491.943	574.646
113.3	-27.1606	-2.13623	26.5503	67.1387	116.882	176.697	247.498	323.181	404.968	492.249	574.646
113.4	-26.2451	-2.13623	26.2451	67.1387	116.577	176.697	249.023	323.792	404.968	492.249	575.256
113.5	-25.9399	-2.13623	26.2451	67.1387	116.577	176.392	249.939	324.097	405.273	492.249	575.867
113.6	-26.2451	-2.44141	26.2451	66.8335	116.577	176.392	250.854	323.792	405.884	491.943	576.782
113.7	-27.1606	-2.13623	26.5503	66.8335	117.187	176.086	251.16	323.792	407.104	491.333	577.393
113.8	-27.771	-2.13623	26.5503	67.4438	118.103	176.392	251.16	323.486	408.02	491.333	577.698
113.9	-27.4658	-2.44141	26.5503	67.749	119.019	176.392	250.549	322.876	408.02	491.028	577.698
114	-27.1606	-3.05176	26.5503	67.749	119.324	176.697	250.549	322.876	407.715	490.723	577.393
114.1	-26.5503	-3.66211	25.9399	67.749	119.324	177.002	250.854	322.876	407.715	490.417	577.087
114.2	-26.2451	-3.96729	25.3296	67.749	119.019	177.307	251.16	323.181	407.41	489.807	576.477
114.3	-26.8555	-3.96729	25.0244	67.4438	118.408	177.612	251.16	323.792	407.41	489.502	575.562
114.4	-27.1606	-3.96729	25.0244	67.1387	118.408	177.612	251.16	324.097	407.104	489.197	574.646
114.5	-27.4658	-3.66211	25.3296	67.1387	118.103	177.917	251.16	324.097	406.494	489.197	574.341
114.6	-27.4658	-3.35693	25.3296	67.4438	118.103	178.528	250.854	324.097	406.189	489.502	574.036
114.7	-27.1606	-3.35693	25.6348	67.749	117.798	178.833	250.854	324.097	405.884	489.807	573.425
114.8	-27.4658	-3.66211	26.5503	67.749	117.798	178.528	250.549	324.402	406.189	490.112	573.425
114.9	-27.1606	-3.66211	27.1606	67.749	118.408	178.528	250.549	324.707	406.799	489.807	573.425
115	-26.8555	-3.66211	27.771	67.749	118.713	178.528	250.854	325.012	407.41	489.502	573.425
115.1	-26.8555	-3.35693	27.4658	67.749	119.324	179.138	250.854	325.317	408.02	489.197	573.425
115.2	-26.8555	-3.05176	26.8555	67.4438	119.324	179.749	250.854	325.623	408.63	488.281	573.12
115.3	-27.4658	-2.74658	26.5503	67.1387	118.713	180.054	250.854	325.928	408.936	487.671	573.425
115.4	-27.771	-2.74658	26.2451	66.8335	118.408	180.054	250.854	326.233	409.241	486.45	573.73
115.5	-28.0762	-3.05176	26.2451	66.5283	117.798	180.359	251.16	326.538	408.63	485.229	574.646
115.6	-28.0762	-3.05176	26.2451	66.8335	117.798	180.359	251.16	326.843	407.715	484.619	575.256
115.7	-28.0762	-3.05176	26.8555	67.1387	118.103	180.664	251.16	327.148	407.104	484.009	575.562
115.8	-27.771	-3.35693	27.1606	67.1387	118.103	180.664	250.854	327.454	406.494	484.009	575.562
115.9	-27.4658	-3.96729	27.4658	66.8335	117.798	180.054	249.634	327.759	405.884	483.704	575.562
116	-27.1606	-4.57764	27.1606	66.8335	117.798	179.138	248.718	327.759	405.273	483.398	575.867
116.1	-26.8555	-5.18799	26.8555	67.4438	117.798	178.223	247.498	328.064	404.053	483.704	575.256
116.2	-26.8555	-4.88281	26.5503	67.4438	117.798	177.917	246.887	328.369	403.137	484.314	574.341
116.3	-26.8555	-4.27246	25.9399	67.4438	117.493	177.917	246.277	328.979	402.222	484.619	573.425
116.4	-26.8555	-3.66211	25.6348	67.4438	117.493	177.612	246.277	329.59	401.917	484.619	572.815
116.5	-27.1606	-3.35693	25.6348	67.4438	116.882	177.612	246.277	329.895	401.917	484.924	572.815
116.6	-27.1606	-3.05176	25.9399	67.749	116.577	177.612	246.582	329.895	401.917	484.924	573.12
116.7	-27.1606	-3.05176	26.2451	68.0542	116.272	177.612	247.498	329.59	402.222	485.229	573.12
116.8	-27.1606	-2.74658	26.5503	68.6646	116.272	177.612	247.803	329.59	402.832	485.84	572.815
116.9	-27.1606	-2.74658	26.5503	68.9697	116.272	177.917	248.413	329.59	403.137	486.145	572.51
117	-27.1606	-3.05176	25.9399	68.6646	116.577	178.223	248.718	329.59	403.137	486.45	572.205
117.1	-27.1606	-3.66211	25.6348	68.3594	117.493	178.223	249.329	330.2	404.053	487.061	572.205
117.2	-27.4658	-3.96729	25.6348	68.3594	117.798	178.528	249.329	330.505	404.968	487.671	571.899
117.3	-27.4658	-3.66211	25.9399	68.3594	118.103	178.833	249.329	330.505	406.189	487.976	571.594
117.4	-27.4658	-3.96729	25.9399	68.0542	117.493	178.833	248.718	330.2	407.104	487.976	570.984
117.5	-27.4658	-3.96729	25.9399	67.4438	116.882	178.528	248.108	329.285	407.41	487.366	570.068
117.6	-27.771	-3.96729	25.6348	67.1387	117.187	178.528	247.803	328.369	407.715	486.45	570.374
117.7	-27.771	-3.96729	25.6348	67.4438	117.493	178.223	248.108	327.759	408.02	485.535	570.984
117.8	-27.771	-4.27246	25.6348	67.749	118.103	177.917	248.108	327.759	408.325	484.924	571.899
117.9	-27.771	-4.57764	25.9399	67.749	118.103	177.307	248.413	327.759	408.02	484.314	572.815
118	-27.771	-4.27246	26.2451	67.4438	117.798	176.697	248.413	327.454	407.715	484.314	573.73
118.1	-28.0762	-3.35693	26.8555	67.1387	117.187	176.086	248.413	326.843	407.104	484.924	574.646
118.2	-28.3813	-3.05176	27.4658	67.1387	116.882	175.781	248.413	325.928	406.494	485.535	574.646
118.3	-28.3813	-2.74658	27.4658	66.8335	116.882	176.086	248.718	325.317	405.884	486.145	574.646
118.4	-27.771	-3.35693	27.1606	66.8335	116.882	177.002	248.718	324.707	405.273	486.755	574.036
118.5	-27.1606	-3.66211	26.5503	67.1387	116.882	177.612	248.718	324.402	405.273	487.061	573.73
118.6	-26.2451	-3.66211	25.9399	67.4438	117.493	177.917	248.413	323.792	405.579	487.366	573.73
118.7	-25.9399	-3.66211	25.9399	67.749	118.103	177.917	247.803	323.486	406.189	487.671	573.425
118.8	-26.2451	-3.66211	26.5503	68.0542	118.408	178.223	247.498	323.181	406.799	487.671	573.12
118.9	-26.8555	-3.35693	26.8555	68.3594	118.713	178.223	247.498	323.181	407.104	487.671	572.205
119	-27.1606	-3.05176	26.5503	68.3594	119.019	177.917	248.108	323.181	407.104	487.671	571.594
119.1	-27.4658	-2.44141	25.9399	68.0542	119.019	177.612	248.413	323.181	407.41	487.976	571.289
119.2	-27.771	-2.44141	25.3296	67.749	119.019	177.612	248.413	323.792	407.41	488.586	571.594
119.3	-28.0762	-2.44141	24.7192	67.4438	118.713	177.307	248.718	324.402	406.799	489.807	571.899
119.4	-28.0762	-3.35693	25.0244	67.4438	118.408	177.002	249.023	325.317	405.884	490.417	572.205
119.5	-28.0762	-3.96729	25.3296	67.1387	118.408	176.697	249.329	325.928	404.968	490.112	572.51
119.6	-27.771	-3.96729	25.3296	67.1387	118.713	176.392	249.329	326.538	403.748	489.502	572.51
119.7	-27.4658	-3.66211	25.6348	67.4438	119.324	176.086	249.023	327.148	402.527	489.197	571.899
119.8	-27.1606	-3.35693	25.3296	67.749	119.324	176.086	249.329	327.148	401.611	488.892	571.289
119.9	-26.8555	-3.35693	25.3296	68.0542	119.324	176.392	249.939	326.843	401.306	489.197	570.679
120	-26.8555	-3.66211	25.0244	67.749	119.019	176.392	250.549	326.538	401.306	489.197	570.679
120.1	-26.2451	-4.27246	25.0244	67.4438	118.713	176.697	250.854	326.538	401.001	489.197	570.679
120.2	-25.9399	-4.27246	25.0244	67.1387	118.408	177.307	250.854	326.843	400.391	489.502	570.679
120.3	-25.9399	-3.96729	25.0244	67.4438	118.408	177.612	250.854	327.454	400.085	489.502	571.289
120.4	-26.2451	-3.96729	24.7192	67.4438	118.713	178.223	250.549	327.759	400.085	490.417	572.205
120.5	-26.2451	-3.96729	24.7192	67.1387	119.324	178.833	250.244	327.759	400.085	491.943	572.51
120.6	-26.2451	-3.96729	25.0244	66.8335	119.629	178.528	249.939	327.759	400.085	493.164	572.51
120.7	-26.5503	-3.35693	25.6348	67.1387	119.629	178.223	249.634	327.148	400.391	493.164	572.205
120.8	-26.8555	-2.74658	26.8555	67.749	119.629	177.612	249.329	326.538	401.001	492.554	572.51
120.9	-27.4658	-2.74658	27.4658	68.6646	119.629	177.002	248.413	326.843	401.611	491.333	572.815
121	-28.0762	-3.05176	27.771	69.5801	119.629	176.392	247.803	327.148	402.222	490.112	572.815
121.1	-28.0762	-3.35693	27.4658	69.8853	118.713	176.392	247.498	327.454	402.222	489.502	572.51
121.2	-27.771	-3.35693	27.1606	69.2749	117.493	177.002	248.108	327.759	402.222	489.197	572.205
121.3	-27.4658	-3.35693	27.4658	68.9697	116.272	177.917	248.718	327.759	402.222	488.586	572.205
121.4	-27.4658	-3.35693	27.771	68.3594	116.272	178.528	249.329	327.454	402.527	487.976	572.815
121.5	-27.1606	-3.05176	27.771	68.0542	117.187	178.833	249.939	327.454	402.832	487.671	573.73
121.6	-26.8555	-3.05176	27.1606	68.3594	118.103	179.138	249.634	327.454	403.137	487.671	574.951
121.7	-26.5503	-3.05176	26.8555	68.3594	119.019	178.528	249.023	327.454	403.137	487.671	575.867
121.8	-26.2451	-3.35693	27.4658	68.3594	119.324	178.223	248.413	326.843	402.832	487.671	576.477
121.9	-26.5503	-3.05176	28.0762	68.0542	119.629	177.917	247.498	326.233	402.832	487.366	577.087
122	-26.8555	-2.74658	28.6865	68.0542	119.629	178.223	246.887	326.233	402.222	487.061	577.393
122.1	-26.8555	-2.13623	28.3813	68.0542	119.324	178.223	247.192	326.233	401.917	487.061	577.698
122.2	-26.2451	-2.13623	27.4658	68.0542	119.019	178.223	247.498	326.233	401.611	487.061	577.698
122.3	-25.9399	-2.44141	26.8555	68.0542	118.713	178.833	247.803	326.233	401.001	487.061	577.393
122.4	-26.2451	-3.35693	26.2451	68.0542	118.408	179.138	247.803	325.623	400.696	487.366	576.782
122.5	-26.8555	-3.96729	25.6348	68.0542	117.798	179.749	247.803	325.317	400.085	487.671	575.867
122.6	-27.1606	-4.27246	25.9399	68.0542	117.493	179.749	247.803	325.317	399.78	488.586	575.256
122.7	-27.771	-4.27246	26.2451	68.0542	117.187	179.443	247.803	325.012	399.78	490.112	574.951
122.8	-28.0762	-4.27246	26.2451	68.3594	116.882	178.833	248.108	325.012	399.17	491.638	574.036
122.9	-28.3813	-3.96729	26.2451	68.3594	116.882	178.528	248.718	325.012	397.949	492.554	573.425
123	-28.0762	-3.96729	26.2451	68.3594	117.187	178.223	249.329	325.317	396.423	492.859	573.12
123.1	-27.771	-3.66211	26.2451	68.3594	118.103	178.223	249.634	325.317	395.203	492.859	572.815
123.2	-27.1606	-3.05176	25.9399	68.9697	118.713	177.917	249.634	325.012	394.897	492.859	572.51
123.3	-26.5503	-2.74658	25.9399	69.5801	119.019	177.307	249.329	324.707	394.897	493.164	571.899
123.4	-26.5503	-2.44141	25.9399	70.1904	119.019	177.002	248.718	323.792	395.508	493.164	571.594
123.5	-26.8555	-2.44141	25.9399	70.1904	118.408	177.002	248.108	323.486	396.423	492.859	571.289
123.6	-27.1606	-2.13623	26.2451	69.8853	118.408	177.002	247.498	323.792	396.729	491.638	571.594
123.7	-27.1606	-2.13623	26.5503	69.5801	118.408	177.307	247.192	323.792	397.034	490.723	572.205
123.8	-27.4658	-2.13623	26.2451	69.5801	118.713	177.002	247.192	324.097	397.949	490.112	572.815
123.9	-27.1606	-2.13623	25.9399	69.2749	119.019	177.002	247.803	324.097	399.17	489.502	574.036
124	-27.1606	-2.13623	25.6348	68.9697	118.713	176.392	248.413	324.097	400.391	489.197	574.646
124.1	-26.8555	-2.13623	25.0244	68.3594	118.103	176.086	248.718	324.097	401.306	488.892	575.256
124.2	-26.5503	-2.13623	24.7192	68.0542	117.798	176.086	248.413	323.486	401.917	489.197	575.562
124.3	-26.2451	-2.13623	25.0244	67.749	117.798	176.086	248.718	322.876	402.527	489.502	575.867
124.4	-26.5503	-2.44141	25.3296	67.749	118.103	176.392	249.023	322.266	403.137	489.807	575.867
124.5	-26.8555	-3.05176	25.0244	68.0542	118.103	176.697	249.023	321.96	403.442	490.112	575.256
124.6	-27.4658	-3.35693	25.3296	68.3594	117.493	176.697	248.413	322.266	403.442	490.112	574.036
124.7	-27.4658	-3.66211	25.6348	68.6646	117.187	177.002	248.718	323.486	402.527	489.807	572.815
124.8	-27.1606	-3.96729	25.9399	68.9697	117.187	177.612	249.023	324.707	401.001	489.197	571.594
124.9	-26.5503	-4.57764	25.6348	68.9697	117.187	178.223	249.023	325.928	400.085	488.892	571.289
125	-25.9399	-4.57764	25.3296	68.3594	117.493	178.833	249.023	325.928	399.17	488.892	572.205
125.1	-25.9399	-4.27246	25.0244	68.0542	117.798	178.833	249.023	325.928	398.56	489.502	573.73
125.2	-25.9399	-3.35693	25.3296	68.0542	117.798	178.833	249.634	325.928	398.254	490.112	575.562
125.3	-25.6348	-2.74658	25.6348	68.3594	117.493	178.528	250.549	325.928	398.865	490.723	576.477
125.4	-25.6348	-2.44141	25.6348	68.3594	117.798	178.223	250.854	325.928	400.085	490.417	577.087
125.5	-25.3296	-2.44141	25.6348	68.3594	117.798	177.917	250.854	326.233	401.306	490.112	577.087
125.6	-25.0244	-2.44141	25.6348	68.0542	117.798	177.917	250.549	326.233	401.611	489.197	576.782
125.7	-25.0244	-2.44141	25.9399	67.749	117.798	177.917	249.939	326.538	401.306	488.586	575.867
125.8	-25.3296	-3.05176	26.2451	67.4438	118.103	177.612	249.634	326.843	401.306	488.586	575.562
125.9	-25.6348	-3.35693	26.2451	67.4438	118.713	177.612	249.023	327.148	401.611	488.586	576.172
126	-26.2451	-3.35693	25.9399	67.749	119.019	177.917	248.718	327.454	401.917	488.892	577.087
126.1	-26.8555	-2.74658	25.6348	68.0542	118.713	178.223	249.023	327.454	402.222	489.197	578.003
126.2	-27.1606	-2.74658	25.9399	68.0542	118.103	178.223	249.023	327.148	402.527	488.892	578.918
126.3	-27.1606	-2.74658	26.5503	67.749	117.493	178.223	249.329	326.843	402.222	488.586	579.529
126.4	-26.8555	-3.05176	27.1606	68.0542	117.187	178.223	249.634	326.843	402.222	487.976	580.139
126.5	-26.8555	-3.66211	27.771	68.0542	117.187	178.223	250.244	327.148	402.222	487.671	580.139
126.6	-26.5503	-3.96729	27.771	68.0542	117.187	178.528	250.549	327.454	402.222	487.366	579.529
126.7	-26.2451	-3.96729	27.4658	68.0542	117.187	178.223	249.939	327.454	401.917	487.061	578.918
126.8	-25.9399	-4.27246	26.8555	68.0542	117.493	177.612	249.023	327.454	401.611	487.366	578.308
126.9	-25.6348	-4.27246	26.2451	68.0542	117.798	176.697	248.413	327.148	401.306	487.976	578.308
127	-25.6348	-4.27246	25.6348	67.749	118.103	176.392	248.718	327.454	401.611	488.892	578.613
127.1	-26.2451	-3.96729	25.6348	67.749	118.408	176.392	248.718	327.759	401.917	488.892	578.613
127.2	-26.8555	-3.35693	25.6348	67.749	118.103	176.392	248.413	328.369	402.222	488.281	578.613
127.3	-26.8555	-3.05176	25.9399	67.4438	118.103	176.697	247.803	328.979	402.222	487.671	578.308
127.4	-26.8555	-2.74658	25.9399	67.1387	118.103	177.002	247.498	329.59	402.527	487.366	578.308
127.5	-27.1606	-2.44141	25.9399	67.1387	117.798	177.612	247.498	329.59	403.137	487.366	578.308
127.6	-27.4658	-1.83105	26.2451	67.1387	117.493	178.223	247.803	329.285	403.442	487.366	578.308
127.7	-27.1606	-1.2207	26.2451	67.749	116.882	178.528	247.803	329.285	403.137	486.755	578.308
127.8	-27.1606	-0.915527	26.5503	68.0542	116.882	178.528	247.803	329.59	402.527	485.84	578.003
127.9	-26.8555	-1.2207	27.1606	68.6646	116.882	177.917	248.108	329.895	402.222	485.535	578.003
128	-26.5503	-1.83105	27.4658	68.3594	117.493	177.612	248.718	330.2	401.917	486.145	577.698
128.1	-26.2451	-2.74658	27.771	68.0542	118.103	177.307	249.023	330.2	401.917	487.671	577.393
128.2	-26.2451	-3.05176	27.771	67.749	118.713	177.307	249.023	329.895	402.222	489.197	576.782
128.3	-26.5503	-3.66211	27.4658	67.4438	119.324	177.612	249.023	329.59	402.832	490.112	576.782
128.4	-26.8555	-3.35693	26.8555	67.1387	119.629	177.612	249.023	329.285	403.137	490.417	577.087
128.5	-27.4658	-3.35693	26.5503	67.1387	119.629	177.612	249.634	328.369	403.748	490.112	577.698
128.6	-27.4658	-3.35693	26.5503	67.1387	119.934	177.307	249.634	327.454	404.663	489.502	577.698
128.7	-26.8555	-3.66211	26.5503	67.1387	120.239	177.002	249.939	326.538	405.884	488.586	577.393
128.8	-26.2451	-3.96729	26.2451	67.4438	120.544	177.002	249.634	326.233	406.494	487.976	576.782
128.9	-25.9399	-4.27246	26.2451	68.3594	120.85	177.002	249.329	326.843	405.579	487.976	575.867
129	-25.6348	-3.96729	26.2451	68.6646	120.544	177.002	249.329	327.148	404.358	488.281	574.951
129.1	-25.3296	-3.35693	26.8555	68.6646	120.544	177.307	249.329	327.148	403.748	488.586	574.341
129.2	-25.3296	-2.74658	27.1606	68.3594	120.239	177.917	249.023	327.148	403.748	489.197	574.036
129.3	-25.9399	-2.13623	27.1606	68.0542	120.85	178.223	248.718	327.759	404.358	489.807	574.341
129.4	-26.5503	-1.83105	26.8555	68.3594	121.46	178.223	248.413	328.369	404.968	490.417	574.951
129.5	-27.4658	-1.83105	26.2451	68.6646	121.765	177.612	248.718	328.369	405.273	490.723	575.562
129.6	-28.0762	-2.13623	25.6348	68.9697	121.155	177.612	249.023	327.759	405.273	490.417	576.172
129.7	-27.771	-2.74658	25.9399	68.3594	119.934	177.917	249.329	326.843	405.273	489.807	576.172
129.8	-27.771	-3.35693	26.5503	67.749	119.019	177.917	249.634	326.843	404.968	489.197	576.172
129.9	-27.4658	-2.74658	26.5503	67.1387	118.713	178.223	249.329	326.538	404.663	489.197	575.562
130	-27.4658	-2.44141	26.8555	66.8335	118.713	178.223	249.329	326.538	404.053	489.502	574.036
130.1	-26.8555	-2.74658	27.1606	66.8335	119.019	178.223	249.329	326.538	403.137	489.807	572.815
130.2	-26.8555	-3.35693	27.4658	67.1387	119.019	178.528	249.329	326.843	402.222	490.112	571.899
130.3	-27.4658	-3.66211	27.4658	67.4438	119.324	178.528	249.023	327.148	401.611	489.807	571.289
130.4	-27.771	-3.66211	27.4658	67.749	119.629	178.528	248.413	327.148	401.001	489.197	571.289
130.5	-27.771	-3.66211	27.4658	67.4438	119.324	178.528	247.803	326.843	400.391	488.586	571.594
130.6	-27.771	-3.96729	26.8555	66.8335	119.324	178.528	247.803	326.538	400.391	488.586	572.205
130.7	-27.771	-3.96729	26.8555	66.5283	119.324	178.223	248.108	325.623	400.696	488.892	572.815
130.8	-28.0762	-3.66211	26.8555	66.8335	119.629	178.223	248.718	325.317	401.306	489.197	573.425
130.9	-28.0762	-3.35693	26.8555	67.4438	119.934	178.528	248.718	325.623	401.917	489.197	573.73
131	-27.771	-3.35693	26.8555	68.3594	120.239	178.223	247.803	325.928	402.832	489.502	574.036
131.1	-27.771	-3.66211	26.2451	68.9697	120.239	177.307	247.498	325.928	403.442	490.112	573.73
131.2	-27.771	-3.66211	25.9399	68.9697	120.239	176.392	247.803	325.928	404.053	491.028	573.425
131.3	-27.771	-3.66211	25.6348	68.9697	119.934	175.476	248.413	326.233	404.053	492.249	573.425
131.4	-27.4658	-3.35693	25.9399	68.9697	119.629	175.171	249.023	326.233	403.748	493.164	573.12
131.5	-26.8555	-3.05176	26.2451	68.3594	118.713	175.171	249.329	326.233	403.442	494.385	572.815
131.6	-26.2451	-2.74658	26.5503	68.0542	118.408	175.781	249.634	326.233	403.137	494.995	571.594
131.7	-26.2451	-2.74658	26.2451	68.0542	118.408	176.697	249.634	325.928	403.442	494.385	570.679
131.8	-26.5503	-3.05176	25.6348	68.6646	118.408	177.917	249.329	325.928	403.748	493.469	570.374
131.9	-27.1606	-3.35693	25.3296	68.9697	118.408	179.138	248.718	325.928	404.053	492.249	570.374
132	-27.771	-3.35693	25.6348	68.9697	118.408	179.443	248.108	325.928	404.053	490.723	570.679
132.1	-28.3813	-2.74658	26.5503	68.3594	118.103	179.138	247.498	325.928	404.053	489.197	570.679
132.2	-28.3813	-2.44141	27.4658	68.0542	118.103	178.528	246.887	325.012	403.748	487.061	570.679
132.3	-28.3813	-2.44141	27.771	67.749	118.408	178.223	246.582	324.402	403.137	485.535	570.068
132.4	-28.6865	-3.35693	27.771	67.4438	118.408	177.612	245.972	324.097	403.137	483.704	570.068
132.5	-28.6865	-3.66211	27.4658	67.4438	118.713	177.612	245.972	324.097	403.137	482.483	570.679
132.6	-28.3813	-3.66211	26.8555	67.1387	119.019	177.917	245.972	324.402	403.442	482.483	571.899
132.7	-27.771	-3.66211	26.2451	66.8335	119.324	178.223	246.277	324.707	403.748	482.483	573.12
132.8	-27.1606	-3.96729	25.9399	67.1387	119.629	178.528	246.582	325.012	403.442	482.788	574.036
132.9	-26.5503	-4.27246	25.6348	67.4438	119.324	178.528	246.582	325.012	403.137	482.483	575.256
133	-26.2451	-3.66211	25.3296	67.749	118.713	177.917	246.277	324.402	402.832	481.873	576.477
133.1	-26.2451	-3.35693	25.9399	68.6646	118.408	177.307	245.972	324.097	402.832	481.873	577.087
133.2	-26.5503	-3.35693	26.2451	68.9697	118.408	177.307	245.972	323.486	402.527	482.483	577.393
133.3	-27.4658	-3.66211	26.8555	68.9697	118.408	177.307	245.667	323.181	402.527	483.704	576.782
133.4	-28.0762	-3.66211	27.1606	68.3594	118.408	177.917	245.972	323.181	402.527	484.924	576.172
133.5	-28.0762	-3.05176	26.8555	68.0542	118.713	178.223	245.972	323.792	402.527	485.229	574.951
133.6	-27.771	-2.74658	26.5503	67.749	119.019	178.833	246.582	324.402	402.222	485.535	574.036
133.7	-27.4658	-2.74658	26.5503	67.749	119.019	179.443	246.887	324.707	402.527	485.535	573.12
133.8	-27.1606	-3.05176	26.5503	67.4438	118.713	179.749	247.498	324.402	403.137	485.84	573.12
133.9	-26.8555	-3.35693	26.2451	67.1387	118.408	180.054	248.108	323.792	404.053	486.145	574.036
134	-26.5503	-3.35693	25.9399	66.2231	118.713	180.054	248.413	323.486	404.968	486.45	574.646
134.1	-26.2451	-3.35693	25.9399	65.918	119.324	179.749	248.413	323.486	405.273	486.45	574.951
134.2	-26.2451	-3.05176	25.9399	65.918	119.934	178.833	248.108	323.792	405.579	486.755	574.341
134.3	-25.9399	-2.74658	26.2451	66.8335	119.629	178.223	247.803	324.097	405.884	486.755	573.12
134.4	-25.9399	-2.74658	26.5503	67.749	119.324	178.223	247.803	324.097	405.884	487.061	571.899
134.5	-26.2451	-3.05176	26.5503	68.3594	118.713	178.528	247.498	324.097	405.579	487.366	571.289
134.6	-26.5503	-3.35693	26.2451	68.3594	118.713	179.138	247.498	324.097	405.579	487.366	570.984
134.7	-26.8555	-3.35693	26.2451	68.0542	118.713	179.749	247.498	323.792	405.884	488.281	570.679
134.8	-27.1606	-3.35693	26.5503	67.749	118.713	179.749	247.498	324.097	406.189	488.892	570.374
134.9	-27.4658	-3.35693	27.4658	67.749	118.408	179.443	247.498	324.402	406.494	489.197	569.763
135	-27.771	-3.35693	28.0762	67.4438	118.103	179.138	247.498	324.402	406.189	489.197	569.153
135.1	-28.0762	-3.66211	27.771	67.4438	117.798	178.833	248.108	324.402	405.579	488.892	568.848
135.2	-28.0762	-3.66211	26.5503	67.4438	117.798	178.833	248.718	324.707	404.053	488.281	568.848
135.3	-27.771	-4.27246	25.6348	67.749	117.798	179.138	249.023	324.707	402.832	487.366	569.153
135.4	-27.4658	-4.57764	24.7192	68.0542	117.798	180.054	249.329	324.402	401.917	486.45	569.458
135.5	-27.4658	-4.57764	24.4141	68.0542	117.798	180.969	249.634	323.792	401.306	485.84	569.458
135.6	-27.4658	-4.27246	24.4141	68.3594	117.798	181.885	250.244	323.181	401.001	485.84	569.153
135.7	-27.771	-3.96729	24.4141	68.9697	117.798	182.19	251.16	322.571	401.306	486.145	568.848
135.8	-27.771	-3.96729	24.4141	69.2749	117.798	181.885	251.77	323.181	401.611	486.755	569.153
135.9	-27.771	-3.66211	24.4141	69.2749	117.798	181.885	252.38	324.402	402.222	487.061	569.458
136	-27.771	-3.96729	24.7192	69.2749	118.408	181.58	252.991	325.623	402.832	487.366	570.068
136.1	-27.4658	-3.96729	25.0244	68.9697	119.019	181.274	253.296	326.233	403.748	487.671	570.984
136.2	-27.1606	-3.66211	25.3296	68.6646	119.324	181.58	252.686	326.538	404.358	487.976	571.289
136.3	-27.4658	-3.66211	25.6348	68.3594	119.019	182.19	252.075	326.843	404.663	488.586	571.594
136.4	-27.771	-3.66211	25.6348	68.3594	119.019	182.19	251.465	327.148	404.968	489.197	571.899
136.5	-27.771	-3.35693	25.6348	68.0542	119.019	181.58	251.16	327.454	404.968	489.807	571.899
136.6	-27.4658	-3.35693	25.6348	68.0542	119.019	180.969	250.854	327.148	405.273	490.417	571.899
136.7	-27.1606	-3.35693	25.6348	68.0542	119.324	180.054	250.549	326.538	405.273	491.333	571.594
136.8	-26.5503	-3.35693	25.9399	67.749	119.629	179.749	250.244	325.928	404.968	491.943	570.068
136.9	-25.9399	-2.74658	25.9399	67.4438	119.629	179.443	249.634	325.928	404.663	492.554	568.237
137	-25.9399	-2.44141	25.9399	66.8335	119.629	179.749	249.023	325.928	404.663	492.554	567.627
137.1	-25.9399	-2.74658	25.9399	66.8335	119.324	180.359	248.413	326.233	405.579	492.249	567.932
137.2	-26.2451	-3.05176	25.9399	67.1387	119.324	181.274	247.803	326.843	406.189	491.943	568.848
137.3	-26.5503	-3.35693	25.9399	67.1387	119.324	181.885	247.498	327.148	406.494	491.028	570.068
137.4	-26.5503	-4.27246	25.3296	67.1387	119.324	182.495	246.887	327.148	407.104	489.197	570.984
137.5	-26.2451	-4.57764	25.3296	66.8335	119.019	182.8	246.277	326.843	407.104	487.366	571.899
137.6	-26.2451	-5.18799	25.3296	66.2231	118.713	182.495	245.361	326.843	407.104	486.145	573.12
137.7	-26.5503	-5.18799	25.9399	66.2231	118.103	181.58	245.056	327.454	406.494	485.535	574.646
137.8	-27.4658	-4.57764	26.5503	66.5283	117.798	180.664	245.361	327.759	405.579	485.535	576.172
137.9	-28.0762	-3.66211	26.8555	66.8335	117.187	180.359	245.972	328.064	404.968	485.229	577.087
138	-28.0762	-3.05176	27.1606	66.8335	116.882	180.664	245.972	327.454	404.968	484.924	577.087
138.1	-28.0762	-2.74658	27.1606	66.2231	117.187	180.664	245.972	326.843	405.273	484.619	577.087
138.2	-27.771	-2.74658	27.1606	66.5283	117.798	180.664	245.667	326.233	405.579	484.619	576.782
138.3	-27.771	-3.05176	26.8555	66.8335	118.408	180.664	245.056	325.928	405.579	484.619	576.172
138.4	-27.4658	-3.66211	27.1606	67.1387	118.713	180.359	245.056	325.928	404.968	485.229	575.562
138.5	-27.1606	-3.96729	27.4658	67.4438	119.019	180.359	245.361	325.928	403.748	485.84	574.341
138.6	-27.4658	-3.66211	27.4658	67.749	119.324	180.664	245.667	325.623	402.832	486.45	573.12
138.7	-27.1606	-3.05176	27.4658	68.0542	119.019	180.969	245.667	325.012	401.917	487.366	572.51
138.8	-26.8555	-2.74658	27.1606	68.0542	118.713	181.58	245.667	325.012	401.306	488.892	572.51
138.9	-26.5503	-2.74658	26.8555	68.3594	118.713	181.885	245.667	325.623	401.001	489.807	572.205
139	-26.5503	-3.05176	26.8555	68.0542	118.713	181.885	245.667	326.538	401.306	489.807	571.594
139.1	-26.8555	-3.35693	26.5503	67.4438	119.019	181.58	245.972	327.148	401.611	489.502	570.374
139.2	-27.1606	-3.66211	26.2451	67.1387	119.324	181.274	246.277	327.454	401.917	489.502	569.458
139.3	-27.1606	-3.96729	26.5503	66.5283	119.324	180.359	246.277	327.454	401.917	489.807	569.153
139.4	-26.8555	-3.96729	26.8555	65.6128	118.713	180.054	245.972	326.843	402.222	490.112	569.458
139.5	-26.2451	-3.96729	27.1606	65.3076	118.103	180.054	245.972	326.233	402.222	490.112	570.374
139.6	-25.6348	-3.05176	26.8555	65.3076	117.798	180.359	245.361	325.928	402.832	489.502	571.289
139.7	-25.3296	-2.44141	26.2451	65.918	117.798	180.359	245.056	325.623	403.137	488.586	571.594
139.8	-25.9399	-2.13623	25.9399	66.5283	118.103	179.749	244.751	325.928	403.137	487.976	571.899
139.9	-26.5503	-2.13623	25.9399	66.5283	118.408	179.138	244.751	326.538	403.137	487.366	571.594
140	-27.1606	-2.74658	26.5503	66.5283	118.713	178.223	245.361	327.148	402.832	487.061	570.679
140.1	-27.771	-3.35693	26.8555	66.2231	118.713	177.612	245.972	327.454	402.527	486.755	569.153
140.2	-27.771	-3.35693	26.8555	66.2231	118.408	177.307	246.582	327.759	402.832	486.45	567.627
140.3	-27.1606	-3.35693	26.2451	66.2231	118.103	177.002	246.887	327.759	403.748	486.45	566.406
140.4	-26.5503	-3.05176	25.9399	66.2231	117.798	177.307	246.887	327.454	404.358	486.145	565.491
140.5	-26.2451	-2.74658	25.6348	66.2231	117.493	178.223	246.887	326.538	404.663	485.84	565.796
140.6	-25.9399	-2.74658	25.6348	66.2231	117.493	178.833	247.192	325.623	404.968	485.535	565.796
140.7	-25.9399	-2.44141	26.2451	66.5283	117.493	179.443	247.192	324.707	404.968	485.535	566.101
140.8	-26.2451	-2.13623	26.5503	66.8335	118.103	179.749	247.803	324.402	405.273	485.535	566.711
140.9	-26.5503	-1.83105	27.4658	67.1387	118.408	180.054	248.413	324.097	405.579	485.229	567.017
141	-26.8555	-1.52588	28.0762	66.5283	118.103	180.359	248.718	323.792	405.579	484.924	567.322
141.1	-26.8555	-1.83105	28.0762	66.5283	118.103	180.359	248.413	323.792	405.579	484.924	567.627
141.2	-26.8555	-2.13623	27.771	66.8335	118.103	180.664	247.803	324.402	404.968	484.924	567.627
141.3	-27.1606	-2.44141	27.1606	67.1387	118.713	181.274	247.192	325.012	404.663	485.229	567.932
141.4	-26.5503	-2.44141	26.5503	67.4438	119.324	181.274	246.887	325.317	404.358	484.924	567.932
141.5	-25.6348	-3.05176	25.9399	67.4438	119.934	180.969	246.887	325.317	404.358	484.924	567.627
141.6	-25.0244	-3.66211	26.2451	67.4438	120.239	180.054	246.887	325.012	404.663	484.924	566.711
141.7	-24.4141	-4.27246	26.8555	67.749	119.934	179.138	247.192	324.707	404.663	485.229	566.101
141.8	-24.1089	-4.57764	27.771	68.0542	119.934	178.833	247.803	324.402	404.358	485.535	566.101
141.9	-24.4141	-4.27246	27.771	68.0542	119.629	178.833	248.413	324.097	404.053	486.145	566.101
142	-24.7192	-3.66211	27.4658	67.749	119.934	179.138	248.108	323.181	404.053	486.755	566.406
142.1	-25.0244	-3.35693	26.8555	67.4438	120.239	179.138	247.498	322.571	404.053	487.366	566.406
142.2	-25.0244	-3.66211	26.2451	67.1387	120.239	179.443	246.887	322.571	404.358	487.976	566.406
142.3	-25.0244	-3.96729	25.9399	66.8335	120.239	179.749	246.277	322.571	404.663	488.586	566.406
142.4	-25.0244	-4.57764	26.5503	66.8335	119.629	179.749	246.277	323.181	405.273	488.892	566.711
142.5	-25.3296	-4.57764	27.1606	67.1387	119.019	180.054	246.582	323.792	406.189	489.197	567.017
142.6	-25.3296	-4.27246	27.4658	67.749	118.408	179.749	246.887	324.097	407.104	489.502	567.322
142.7	-25.6348	-3.66211	27.4658	68.3594	117.798	179.749	247.192	324.707	407.715	489.502	567.322
142.8	-25.9399	-3.35693	27.1606	68.6646	117.493	179.138	247.498	325.012	408.02	488.892	567.322
142.9	-26.2451	-3.05176	26.8555	68.9697	117.493	178.833	247.803	325.317	407.715	488.281	567.017
143	-26.8555	-3.05176	26.8555	68.6646	117.798	178.528	247.803	325.012	407.104	487.976	566.711
143.1	-27.1606	-3.05176	26.8555	68.0542	118.103	178.833	248.413	325.012	406.189	488.281	566.711
143.2	-27.1606	-3.05176	26.8555	67.4438	118.103	178.528	249.023	325.317	405.579	488.281	566.101
143.3	-27.1606	-3.05176	26.8555	67.1387	118.408	178.223	249.939	325.317	405.273	487.976	565.491
143.4	-27.1606	-3.05176	27.1606	67.4438	118.408	177.612	249.939	325.928	404.663	487.671	564.575
143.5	-27.1606	-3.35693	27.771	68.0542	118.408	177.307	249.634	325.928	404.663	487.976	563.354
143.6	-26.5503	-3.66211	28.0762	68.3594	118.408	177.307	249.023	325.928	404.663	488.281	562.134
143.7	-25.9399	-3.66211	28.3813	68.6646	118.408	177.612	248.718	325.317	404.663	488.586	561.218
143.8	-25.6348	-3.35693	27.771	68.9697	118.408	178.223	249.023	324.707	404.358	488.892	561.218
143.9	-25.6348	-3.05176	27.1606	68.9697	118.408	178.833	249.329	324.402	403.442	489.807	561.829
144	-25.9399	-3.05176	26.5503	68.6646	118.713	178.833	249.329	323.792	402.832	491.333	563.049
144.1	-26.2451	-3.05176	26.8555	68.3594	118.408	178.833	249.023	323.181	402.527	492.554	563.965
144.2	-26.5503	-2.74658	27.1606	68.3594	118.103	178.833	249.329	322.571	403.137	493.164	563.965
144.3	-26.8555	-2.44141	27.771	68.3594	118.713	178.833	249.634	321.655	404.358	492.554	563.965
144.4	-26.5503	-2.44141	28.3813	68.6646	119.019	178.833	249.634	321.35	405.579	491.333	563.049
144.5	-26.2451	-2.13623	28.0762	68.6646	119.629	178.833	249.329	321.96	406.799	490.417	562.439
144.6	-25.9399	-1.83105	27.4658	68.3594	119.629	179.138	248.718	322.571	407.41	489.502	562.134
144.7	-26.2451	-1.83105	26.8555	68.3594	119.324	179.443	248.718	322.876	407.41	488.892	561.829
144.8	-26.5503	-1.83105	25.9399	68.6646	119.324	179.749	248.413	323.181	407.715	487.976	562.134
144.9	-26.8555	-1.83105	25.0244	68.6646	119.324	179.749	248.718	323.181	408.02	487.366	562.439
145	-27.1606	-1.83105	24.7192	68.3594	119.324	179.749	248.718	323.486	408.63	487.061	562.134
145.1	-27.1606	-2.74658	25.0244	68.3594	119.019	179.749	248.718	323.486	408.63	486.755	561.218
145.2	-27.1606	-3.66211	25.3296	68.3594	118.408	180.359	248.718	323.181	408.63	486.755	560.608
145.3	-27.4658	-3.96729	25.6348	68.6646	117.798	180.969	248.413	322.876	408.936	486.45	560.608
145.4	-27.4658	-3.96729	25.9399	68.6646	118.103	181.274	248.108	322.876	408.936	485.535	560.608
145.5	-27.1606	-3.96729	26.5503	68.6646	118.408	181.274	247.498	323.792	407.715	484.924	560.608
145.6	-26.2451	-3.66211	26.8555	68.3594	118.713	181.274	247.498	325.012	406.799	485.229	560.608
145.7	-25.3296	-3.96729	27.1606	68.3594	119.019	181.274	247.803	325.623	406.494	486.145	560.913
145.8	-25.3296	-3.96729	27.1606	68.3594	118.713	181.274	247.803	326.233	406.494	487.366	561.218
145.9	-25.9399	-4.27246	27.4658	68.0542	118.103	181.58	247.498	325.928	406.189	487.976	561.829
146	-26.8555	-4.27246	27.4658	67.4438	117.798	181.274	247.498	325.928	405.884	488.281	561.829
146.1	-27.4658	-4.27246	27.771	67.1387	117.798	180.969	247.498	325.928	405.273	488.586	561.829
146.2	-27.771	-3.96729	27.771	67.749	117.493	180.664	247.803	325.928	404.968	488.281	561.829
146.3	-27.4658	-3.35693	27.771	68.0542	117.493	180.664	248.108	326.233	404.358	488.281	561.829
146.4	-27.4658	-2.74658	27.771	67.749	117.798	180.359	248.108	326.538	404.053	488.281	562.134
146.5	-27.1606	-2.13623	27.4658	67.1387	117.798	179.749	247.803	326.843	403.442	489.197	563.049
146.6	-26.5503	-1.83105	26.8555	67.1387	117.493	179.138	247.498	327.148	402.832	489.807	564.27
146.7	-25.9399	-2.44141	26.2451	67.4438	117.187	178.833	246.582	327.454	403.137	490.417	565.491
146.8	-25.9399	-3.05176	26.2451	68.0542	116.882	178.833	246.277	327.454	403.137	491.028	566.406
146.9	-26.2451	-3.66211	26.5503	68.9697	117.187	179.138	245.972	327.454	403.442	491.638	566.711
147	-26.5503	-3.35693	26.8555	68.9697	117.798	179.443	245.972	327.454	403.748	491.638	566.406
147.1	-26.2451	-2.74658	26.8555	68.6646	118.408	179.443	245.667	327.148	404.358	490.723	565.796
147.2	-25.9399	-2.13623	27.1606	68.3594	118.713	178.833	245.361	326.843	405.273	489.197	564.88
147.3	-25.6348	-2.13623	27.4658	68.3594	118.408	178.223	245.056	326.538	405.884	487.061	564.575
147.4	-25.3296	-2.44141	27.1606	68.6646	118.103	177.612	245.361	326.538	406.799	485.535	564.88
147.5	-25.0244	-3.35693	26.2451	69.5801	117.798	177.917	245.361	326.233	407.715	485.229	565.796
147.6	-25.3296	-3.96729	25.6348	69.8853	117.798	178.528	245.667	326.233	408.63	485.535	566.406
147.7	-25.9399	-4.57764	25.3296	69.5801	117.798	179.443	245.972	326.538	408.936	486.145	566.406
147.8	-26.8555	-4.57764	25.6348	69.5801	118.103	179.443	246.277	327.148	408.325	487.061	566.101
147.9	-27.1606	-4.57764	25.9399	69.5801	118.408	179.443	246.582	328.064	407.715	487.976	565.186
148	-27.1606	-4.27246	25.9399	69.8853	118.103	179.443	246.277	328.369	407.104	488.892	564.575
148.1	-26.8555	-3.96729	26.2451	69.8853	117.493	179.443	246.277	328.064	406.494	489.197	563.66
148.2	-26.5503	-3.96729	26.2451	69.5801	116.882	179.138	246.277	327.759	406.189	488.892	563.354
148.3	-26.2451	-3.96729	26.5503	69.2749	116.882	179.443	245.667	327.454	405.884	487.976	563.66
148.4	-25.9399	-3.96729	26.2451	68.9697	117.493	180.054	245.361	327.148	405.579	487.061	564.575
148.5	-25.9399	-3.96729	26.2451	68.9697	118.103	180.054	245.361	327.148	405.273	486.45	565.491
148.6	-26.2451	-3.66211	26.2451	68.9697	118.408	179.749	245.361	326.843	405.579	486.45	566.101
148.7	-26.5503	-3.96729	26.2451	68.6646	118.408	179.443	245.667	326.538	405.884	486.755	566.101
148.8	-26.5503	-3.96729	26.2451	68.6646	118.408	179.443	245.361	326.538	405.579	487.061	566.101
148.9	-26.5503	-3.96729	26.5503	68.6646	118.103	180.054	245.667	326.538	404.663	486.755	565.796
149	-26.8555	-3.35693	26.2451	68.6646	118.103	180.359	245.972	326.843	403.442	486.755	565.491
149.1	-26.8555	-3.05176	26.2451	68.3594	117.798	180.664	246.582	326.538	402.832	486.755	564.575
149.2	-26.5503	-2.74658	25.6348	68.0542	118.103	180.969	246.582	326.538	402.527	487.366	563.354
149.3	-26.2451	-2.74658	25.3296	68.0542	118.408	181.58	245.972	326.233	403.137	487.976	562.134
149.4	-26.5503	-3.05176	25.3296	67.749	118.103	181.58	245.667	325.623	403.748	488.586	561.218
149.5	-26.5503	-3.35693	25.6348	67.749	117.798	181.58	245.361	325.012	404.358	489.197	561.523
149.6	-26.5503	-3.35693	25.9399	67.749	117.493	181.274	245.361	324.402	404.358	489.502	562.439
149.7	-26.2451	-3.66211	26.2451	68.0542	117.187	180.969	245.361	324.707	404.053	489.502	563.049
149.8	-25.6348	-3.96729	26.5503	67.749	117.187	180.664	245.667	325.012	403.748	489.197	563.66
149.9	-25.6348	-3.96729	26.8555	66.8335	117.493	180.359	245.667	325.317	404.053	488.586	564.27
150	-25.9399	-3.96729	26.5503	66.2231	118.103	180.359	245.361	325.623	404.663	488.281	564.88
150.1	-25.9399	-3.96729	26.2451	65.918	118.713	180.664	245.056	325.623	405.884	487.366	565.491
150.2	-25.6348	-4.57764	26.2451	65.918	119.324	181.274	244.751	325.623	406.799	487.061	566.101
150.3	-25.3296	-4.88281	26.2451	65.918	119.629	181.885	244.751	325.623	407.104	487.061	566.711
150.4	-25.3296	-5.18799	26.2451	65.918	119.324	181.885	245.056	325.623	406.799	487.061	567.322
150.5	-25.6348	-5.18799	26.2451	65.918	118.408	181.58	245.667	325.623	406.189	486.755	566.711
150.6	-25.9399	-4.88281	25.9399	66.2231	117.798	181.274	245.972	325.317	406.189	486.755	565.491
150.7	-26.5503	-4.88281	25.6348	66.5283	117.187	180.969	245.972	325.012	406.189	487.061	564.27
150.8	-26.8555	-4.88281	25.6348	67.1387	117.798	180.969	245.667	325.012	406.189	487.366	563.049
150.9	-27.1606	-4.57764	25.9399	67.749	118.408	180.664	245.361	325.012	405.884	487.671	562.134
151	-27.4658	-3.96729	25.9399	68.0542	119.019	180.664	245.056	325.317	405.579	487.976	561.218
151.1	-27.4658	-3.35693	25.9399	67.749	119.629	180.359	245.361	325.317	405.579	488.586	560.913
151.2	-27.1606	-3.05176	25.9399	66.8335	120.239	180.054	245.972	325.012	405.273	489.502	560.608
151.3	-26.5503	-3.05176	25.6348	65.918	120.85	179.749	246.887	325.317	404.968	490.112	560.913
151.4	-26.5503	-3.35693	25.0244	65.6128	120.544	179.749	247.498	325.623	405.579	490.723	560.913
151.5	-26.8555	-3.35693	24.7192	65.6128	119.934	179.749	247.803	325.623	406.189	491.028	560.303
151.6	-27.4658	-3.35693	24.7192	65.6128	119.629	179.749	247.498	325.928	406.494	491.638	559.998
151.7	-27.4658	-3.35693	24.7192	65.918	119.629	180.054	247.192	326.233	406.799	491.333	559.692
151.8	-26.8555	-3.35693	25.0244	66.2231	119.934	180.054	247.192	326.233	406.799	491.028	559.387
151.9	-26.5503	-3.35693	25.0244	66.5283	119.629	179.749	247.192	326.538	406.494	490.112	559.387
152	-26.5503	-3.35693	25.3296	66.5283	119.324	179.749	247.192	326.538	406.494	488.892	559.387
152.1	-27.1606	-3.05176	25.6348	66.5283	119.019	179.749	247.192	327.454	406.189	487.671	558.777
152.2	-27.4658	-2.74658	25.9399	66.5283	119.019	180.054	247.192	328.674	406.189	486.755	558.472
152.3	-27.771	-2.44141	25.9399	66.2231	119.019	180.054	247.192	329.895	406.189	486.145	558.777
152.4	-27.771	-2.44141	25.6348	66.2231	119.629	179.749	246.887	330.505	405.884	486.145	559.082
152.5	-27.4658	-2.44141	25.6348	66.5283	119.934	179.443	246.582	330.505	405.884	485.84	559.387
152.6	-27.1606	-2.44141	25.3296	66.8335	120.239	179.138	246.277	330.2	405.884	485.84	559.998
152.7	-26.8555	-3.05176	25.6348	66.8335	120.239	179.443	246.277	329.59	405.579	486.145	560.608
152.8	-26.5503	-3.35693	26.2451	66.8335	120.239	179.749	246.582	328.674	404.968	486.145	561.218
152.9	-26.5503	-3.35693	26.5503	66.8335	120.239	179.749	247.192	327.759	404.663	486.145	561.523
153	-27.1606	-3.35693	26.2451	66.5283	119.934	179.443	247.803	327.759	404.358	486.145	562.439
153.1	-27.771	-3.35693	25.9399	66.5283	119.324	179.138	248.108	328.064	404.053	485.84	563.354
153.2	-27.4658	-3.66211	25.6348	66.8335	119.019	178.528	247.803	328.064	403.748	485.535	564.27
153.3	-26.8555	-3.66211	25.3296	66.8335	118.713	178.223	247.498	327.759	403.137	485.535	564.88
153.4	-26.2451	-3.66211	25.3296	66.5283	118.713	178.528	246.887	327.454	402.832	485.535	564.88
153.5	-25.9399	-3.66211	25.0244	66.2231	119.019	178.528	246.887	327.759	402.832	485.535	564.575
153.6	-26.5503	-3.05176	25.3296	66.2231	119.019	178.833	246.887	328.369	402.527	485.229	564.88
153.7	-26.8555	-2.74658	25.6348	66.5283	118.713	178.528	247.192	329.285	402.832	484.009	565.491
153.8	-26.8555	-2.74658	26.2451	67.1387	118.408	178.528	247.192	329.895	403.137	482.788	566.101
153.9	-27.1606	-2.74658	26.5503	68.0542	118.103	178.528	247.192	329.895	403.442	482.788	566.101
154	-27.1606	-3.05176	26.8555	68.3594	117.798	178.528	247.498	329.59	403.748	483.093	565.491
154.1	-27.1606	-3.05176	26.5503	68.3594	117.493	178.833	247.498	328.979	404.053	484.009	564.27
154.2	-26.8555	-3.35693	26.2451	68.0542	117.187	178.833	247.192	328.979	404.358	484.924	563.354
154.3	-26.8555	-3.66211	25.9399	67.749	117.187	178.833	247.803	329.285	404.358	485.84	562.744
154.4	-26.8555	-3.66211	25.9399	67.4438	117.187	178.833	248.718	329.285	404.358	486.145	562.134
154.5	-27.1606	-3.66211	25.9399	67.4438	117.187	179.443	249.634	329.285	404.663	486.145	561.523
154.6	-27.1606	-3.66211	26.2451	67.749	117.187	180.359	250.244	328.674	405.579	485.229	561.218
154.7	-26.5503	-3.66211	27.1606	67.4438	117.493	181.274	250.244	327.759	406.494	484.314	561.829
154.8	-26.2451	-3.66211	27.771	66.8335	118.103	180.969	249.939	327.454	407.104	483.704	563.049
154.9	-25.9399	-3.35693	27.771	66.5283	118.408	180.359	249.329	327.454	407.104	482.788	564.88
155	-25.9399	-3.35693	27.1606	66.5283	118.408	179.443	248.413	328.064	407.104	482.178	566.406
155.1	-25.9399	-3.96729	26.8555	66.8335	117.798	178.833	248.108	328.674	406.494	481.567	567.322
155.2	-26.2451	-4.27246	27.1606	67.4438	117.187	178.223	248.108	329.285	406.189	481.262	567.932
155.3	-26.8555	-4.27246	27.1606	68.0542	116.882	177.917	248.413	329.285	405.884	481.567	568.237
155.4	-26.8555	-3.96729	27.4658	68.0542	117.187	177.917	248.718	328.979	405.884	482.178	568.848
155.5	-26.5503	-3.66211	26.8555	67.749	117.187	177.917	248.718	327.759	406.799	483.093	569.153
155.6	-26.2451	-3.66211	26.2451	67.1387	117.493	178.528	248.718	326.843	407.715	484.009	569.153
155.7	-25.9399	-3.66211	25.6348	66.2231	118.103	179.138	248.718	325.928	408.63	484.924	568.542
155.8	-25.6348	-3.66211	25.6348	65.918	119.324	179.443	248.718	325.623	408.936	486.45	567.627
155.9	-25.6348	-3.66211	25.9399	66.2231	120.239	179.443	249.023	326.233	408.02	487.366	566.711
156	-26.2451	-3.35693	26.5503	66.5283	120.239	179.443	249.634	326.843	407.41	487.671	566.711
156.1	-26.8555	-3.35693	27.1606	67.4438	119.629	179.443	249.634	327.759	407.104	487.976	566.711
156.2	-26.8555	-3.35693	27.771	68.6646	118.713	179.138	249.329	328.064	406.799	488.281	567.017
156.3	-26.8555	-3.66211	27.771	68.9697	117.493	179.138	248.413	328.064	406.189	489.197	567.322
156.4	-26.8555	-3.66211	27.1606	68.9697	117.187	178.528	248.108	328.064	405.273	489.502	567.017
156.5	-26.5503	-3.35693	26.5503	68.3594	116.577	177.917	248.413	327.759	403.748	489.197	567.017
156.6	-26.2451	-3.35693	26.2451	67.749	116.272	177.307	249.023	327.759	402.527	488.892	566.711
156.7	-25.9399	-3.05176	25.9399	67.1387	116.272	177.307	249.634	328.369	401.917	488.586	566.406
156.8	-25.9399	-3.05176	25.6348	66.8335	115.967	177.917	250.244	329.285	401.917	488.281	566.101
156.9	-26.2451	-3.35693	25.9399	66.8335	116.272	178.833	250.549	330.2	402.222	487.366	565.491
157	-26.2451	-3.35693	26.2451	67.1387	116.882	179.749	250.549	330.505	402.527	486.45	564.88
157.1	-26.5503	-3.66211	26.5503	67.1387	117.493	180.664	250.549	329.895	402.832	485.84	564.575
157.2	-26.8555	-3.96729	27.1606	67.1387	117.798	180.664	250.549	329.285	403.137	484.924	563.965
157.3	-27.1606	-3.66211	27.1606	67.1387	118.103	180.359	250.244	328.674	404.053	484.314	563.66
157.4	-27.1606	-3.05176	27.1606	66.5283	118.408	180.054	249.634	328.674	405.273	484.009	563.354
157.5	-27.1606	-2.44141	26.8555	66.5283	118.408	179.749	249.329	328.674	406.189	484.009	562.439
157.6	-26.8555	-1.83105	26.8555	66.5283	118.408	179.749	249.634	328.369	407.104	484.314	561.523
157.7	-26.5503	-1.83105	26.8555	66.8335	118.103	180.054	250.244	328.369	408.325	485.229	560.608
157.8	-26.5503	-2.13623	27.1606	66.8335	117.798	180.664	250.854	328.369	409.241	485.84	560.608
157.9	-26.5503	-3.05176	27.1606	66.8335	118.103	180.969	251.465	328.369	410.156	486.45	560.913
158	-26.8555	-3.35693	27.1606	67.1387	118.408	180.664	251.465	328.674	410.461	487.061	561.523
158.1	-27.1606	-3.66211	26.8555	66.8335	119.019	180.054	251.16	328.979	410.767	487.366	561.829
158.2	-27.1606	-3.35693	26.8555	66.8335	119.019	179.749	250.549	329.285	411.377	487.061	561.829
158.3	-27.1606	-3.05176	26.8555	67.1387	119.019	179.749	249.939	329.285	411.682	486.45	561.829
158.4	-26.8555	-2.74658	26.8555	67.749	118.713	180.054	249.634	329.59	411.682	486.145	562.134
158.5	-26.2451	-2.44141	26.5503	67.749	118.713	180.359	249.329	329.59	411.682	486.145	562.744
158.6	-25.6348	-2.44141	26.8555	67.4438	118.713	180.359	249.023	329.285	411.682	486.145	563.354
158.7	-25.0244	-2.74658	27.1606	66.8335	119.019	180.359	248.718	328.674	411.682	486.45	563.965
158.8	-24.4141	-3.05176	27.4658	66.2231	118.713	180.054	248.108	328.369	411.377	486.45	564.575
158.9	-24.7192	-2.74658	27.1606	66.2231	118.408	179.138	248.108	328.064	411.072	486.755	564.575
159	-25.0244	-2.44141	26.5503	66.8335	117.798	178.833	248.413	328.369	410.156	487.061	564.27
159.1	-25.3296	-2.13623	26.2451	68.0542	117.187	178.833	249.023	328.674	409.851	486.45	563.66
159.2	-25.6348	-1.83105	26.5503	68.9697	117.187	179.138	249.023	328.979	409.851	485.535	563.049
159.3	-25.6348	-1.83105	26.8555	69.2749	117.493	179.443	249.023	328.979	409.546	485.229	562.439
159.4	-25.3296	-1.83105	27.1606	68.6646	118.103	179.749	249.023	328.369	408.63	485.535	562.134
159.5	-25.3296	-1.83105	27.1606	67.749	118.713	179.749	249.329	328.064	408.02	486.45	562.134
159.6	-25.3296	-2.44141	27.1606	67.1387	119.019	179.749	249.634	328.369	407.41	487.671	562.134
159.7	-25.6348	-3.05176	27.1606	67.1387	118.713	179.749	249.939	328.369	406.799	489.197	562.744
159.8	-25.6348	-3.35693	27.4658	67.1387	118.103	180.054	250.244	328.064	405.884	489.807	563.354
159.9	-26.2451	-3.35693	27.4658	67.4438	118.103	180.359	249.939	328.064	404.968	490.417	564.27
160	-26.2451	-3.35693	27.4658	67.4438	118.408	180.359	249.634	327.759	404.053	490.417	565.491
160.1	-26.2451	-3.05176	27.1606	67.4438	118.713	179.749	249.329	327.454	403.442	490.112	567.627
160.2	-26.5503	-3.35693	26.8555	67.4438	118.713	179.138	249.329	326.538	403.748	490.112	569.458
160.3	-27.1606	-3.35693	26.8555	67.749	118.408	178.528	249.329	325.928	404.358	489.807	570.068
160.4	-27.4658	-3.66211	26.8555	68.0542	118.103	178.223	249.329	325.623	404.968	489.197	570.679
160.5	-27.1606	-3.66211	26.8555	68.9697	117.493	178.528	249.329	325.623	404.968	488.281	571.289
160.6	-27.1606	-3.66211	26.5503	69.2749	117.187	178.528	249.329	326.233	404.663	487.366	571.899
160.7	-27.4658	-3.66211	26.2451	69.2749	117.187	178.833	249.023	326.538	404.358	487.061	571.594
160.8	-27.4658	-3.35693	26.2451	68.6646	117.798	178.833	248.413	326.843	404.053	487.366	570.984
160.9	-27.4658	-3.35693	26.2451	68.0542	118.103	178.833	248.108	327.148	403.442	488.281	569.458
161	-27.4658	-3.66211	26.2451	67.749	118.713	178.528	247.803	327.454	403.442	488.892	567.932
161.1	-27.1606	-3.35693	26.8555	67.4438	119.019	178.528	248.108	327.759	403.442	489.502	566.711
161.2	-26.8555	-3.35693	27.4658	68.0542	119.019	178.223	248.718	328.064	404.358	489.502	566.406
161.3	-26.2451	-3.05176	27.771	68.3594	119.324	178.223	249.023	327.759	405.579	489.502	566.101
161.4	-25.9399	-2.74658	28.0762	68.6646	119.324	178.528	249.023	326.843	406.494	489.197	566.101
161.5	-25.6348	-2.74658	28.0762	68.3594	119.934	178.833	248.413	325.928	407.41	488.586	566.101
161.6	-25.6348	-2.44141	27.771	67.749	120.85	178.833	248.108	325.317	407.104	487.976	566.101
161.7	-25.6348	-2.44141	27.4658	67.749	121.155	178.223	248.413	325.012	406.494	487.366	566.711
161.8	-25.6348	-2.44141	27.4658	68.0542	121.155	177.612	249.023	325.012	406.189	487.366	567.322
161.9	-25.9399	-2.74658	27.4658	68.3594	120.544	177.002	249.329	325.317	406.494	487.671	567.932
162	-25.9399	-3.35693	27.4658	68.0542	119.629	176.697	249.023	325.623	406.799	487.671	568.237
162.1	-25.9399	-3.66211	27.1606	67.749	118.713	176.697	248.718	326.233	407.104	487.061	568.237
162.2	-26.2451	-3.66211	27.1606	67.4438	118.408	177.002	249.023	327.454	406.799	486.45	568.542
162.3	-26.2451	-3.66211	26.8555	67.4438	118.713	177.307	249.939	328.369	406.799	485.535	568.542
162.4	-26.5503	-3.66211	26.8555	67.749	118.713	177.612	251.16	328.369	406.799	484.619	568.542
162.5	-26.5503	-3.35693	27.1606	68.3594	118.713	177.917	251.77	328.674	406.799	483.704	568.237
162.6	-26.5503	-3.35693	27.4658	68.6646	119.019	178.833	251.465	328.674	406.494	483.398	568.237
162.7	-26.5503	-3.35693	26.8555	68.6646	119.629	179.138	251.16	328.674	406.494	483.093	569.153
162.8	-26.2451	-3.05176	26.5503	68.3594	119.629	179.138	250.549	328.369	406.189	483.398	570.068
162.9	-26.2451	-3.05176	26.2451	68.3594	119.324	179.138	249.329	327.759	405.884	483.704	570.984
163	-26.2451	-3.05176	26.5503	68.3594	118.408	178.833	248.108	327.148	405.579	484.619	571.594
163.1	-26.5503	-2.74658	27.1606	68.3594	117.798	178.223	247.192	326.538	404.968	485.535	571.289
163.2	-26.5503	-2.74658	27.1606	68.3594	117.493	177.917	246.887	326.538	404.053	486.45	570.374
163.3	-26.2451	-2.44141	27.1606	68.0542	117.798	177.612	246.582	326.538	403.137	487.061	569.458
163.4	-25.6348	-3.05176	27.4658	67.749	118.408	177.612	246.277	326.843	402.527	487.061	568.848
163.5	-25.3296	-3.96729	27.4658	67.4438	119.019	177.612	245.972	326.843	401.611	487.061	568.237
163.6	-25.9399	-4.57764	27.4658	67.4438	119.019	177.612	245.667	326.843	401.001	487.061	568.237
163.7	-26.5503	-5.18799	27.4658	67.4438	118.408	177.612	245.667	326.843	401.306	487.671	568.542
163.8	-26.5503	-5.49316	27.1606	68.0542	117.798	177.307	245.667	327.454	401.917	487.976	569.153
163.9	-26.2451	-4.88281	26.5503	68.9697	117.493	177.612	245.972	327.759	402.527	487.671	569.763
164	-26.2451	-4.27246	26.2451	69.2749	117.493	177.917	246.277	328.674	403.137	487.061	570.068
164.1	-26.2451	-3.66211	26.2451	69.8853	117.493	178.528	246.887	328.979	403.137	486.45	570.374
164.2	-26.2451	-3.35693	26.5503	69.2749	117.187	179.138	247.498	328.979	402.832	486.145	570.679
164.3	-26.5503	-3.66211	26.8555	68.3594	117.493	179.749	247.498	328.369	402.527	486.145	571.289
164.4	-26.5503	-3.96729	26.5503	67.4438	117.798	180.054	247.192	327.454	403.137	485.84	571.899
164.5	-26.5503	-4.27246	26.2451	67.1387	117.798	180.054	246.887	327.148	403.748	485.229	571.899
164.6	-26.5503	-4.27246	25.9399	67.1387	117.798	179.443	246.887	327.454	404.358	484.314	571.899
164.7	-26.5503	-4.27246	26.2451	67.1387	117.493	178.833	246.582	327.759	404.358	483.704	571.899
164.8	-26.8555	-3.96729	26.5503	67.1387	117.493	178.833	245.972	328.064	404.358	483.093	571.899
164.9	-26.5503	-3.35693	26.5503	66.8335	117.493	179.138	245.667	328.674	404.663	483.093	571.594
165	-26.2451	-3.05176	26.5503	66.8335	117.493	179.138	245.361	328.979	405.273	483.398	570.984
165.1	-26.2451	-3.05176	26.8555	66.8335	117.493	179.443	245.361	329.59	405.579	483.704	570.374
165.2	-26.2451	-3.66211	26.8555	67.1387	117.493	180.054	245.972	330.2	405.273	484.009	569.153
165.3	-26.5503	-3.96729	27.1606	67.1387	117.493	180.359	246.887	329.59	404.358	484.314	568.848
165.4	-26.8555	-4.27246	27.1606	67.1387	117.798	180.664	247.803	328.979	402.832	484.314	568.848
165.5	-26.8555	-4.27246	26.8555	67.749	118.103	180.664	248.413	328.369	401.917	484.314	569.458
165.6	-27.1606	-4.27246	26.5503	68.3594	118.713	180.359	248.108	328.369	401.306	484.619	570.068
165.7	-27.1606	-3.96729	26.2451	68.3594	119.019	179.749	247.803	328.064	401.306	484.619	570.984
165.8	-27.1606	-3.66211	25.9399	67.749	119.019	179.138	247.498	327.759	401.917	484.009	571.594
165.9	-26.8555	-3.96729	25.9399	67.4438	118.713	178.223	247.498	327.454	401.917	483.093	571.899
166	-26.2451	-4.57764	26.2451	67.4438	119.019	177.917	247.803	327.148	401.611	482.178	571.899
166.1	-25.6348	-4.88281	26.5503	67.4438	119.324	177.917	248.413	326.843	401.611	481.567	571.594
166.2	-25.3296	-4.88281	26.8555	67.749	119.629	177.917	248.718	327.148	401.917	481.262	570.374
166.3	-25.0244	-4.57764	27.1606	68.3594	119.934	178.528	248.413	327.454	402.527	481.262	569.153
166.4	-25.0244	-3.96729	26.8555	68.9697	120.239	178.528	248.108	327.759	403.137	481.567	567.932
166.5	-25.3296	-3.35693	26.8555	68.9697	120.239	178.528	247.803	328.064	403.137	482.178	567.017
166.6	-25.9399	-3.35693	26.5503	68.3594	119.934	178.223	248.108	328.064	403.137	482.788	566.711
166.7	-26.2451	-3.05176	26.2451	67.749	119.324	177.917	248.413	328.369	403.442	483.093	567.322
166.8	-26.5503	-2.74658	25.9399	67.1387	119.019	178.223	248.718	328.369	403.442	483.398	568.542
166.9	-27.4658	-2.74658	25.9399	66.5283	118.408	178.223	249.023	328.369	403.137	483.704	569.763
167	-27.771	-2.74658	26.5503	66.5283	118.103	177.917	249.023	328.674	402.527	484.314	570.984
167.1	-28.0762	-3.05176	27.4658	66.5283	118.103	177.307	249.329	328.674	401.306	485.229	571.899
167.2	-28.0762	-3.35693	28.0762	66.2231	118.103	176.697	249.023	328.674	400.085	485.535	572.205
167.3	-27.4658	-2.74658	28.0762	66.2231	118.103	176.392	248.718	328.369	398.56	485.84	572.205
167.4	-26.5503	-2.44141	27.771	66.5283	118.103	176.697	248.108	327.454	397.034	485.535	572.205
167.5	-25.9399	-2.44141	26.8555	66.8335	118.408	177.002	247.803	327.148	396.423	484.619	572.205
167.6	-25.9399	-2.74658	26.2451	67.4438	118.408	177.002	247.803	326.538	396.118	483.704	572.51
167.7	-26.2451	-3.05176	25.6348	67.749	117.493	177.002	247.803	326.233	396.423	483.093	572.815
167.8	-26.2451	-3.35693	25.9399	68.3594	116.577	177.002	247.803	325.928	397.034	482.788	572.815
167.9	-25.9399	-3.35693	26.2451	68.3594	115.662	176.697	247.498	326.233	397.949	482.788	572.815
168	-25.9399	-3.35693	26.5503	68.3594	115.051	176.392	247.498	326.538	399.17	483.093	572.205
168.1	-26.5503	-3.35693	26.8555	67.749	115.051	176.086	248.108	327.454	399.78	483.704	570.984
168.2	-27.1606	-3.35693	27.1606	67.749	115.051	176.086	249.023	328.064	400.696	484.314	569.763
168.3	-27.1606	-3.05176	27.4658	68.0542	115.662	175.781	249.634	328.674	401.611	484.619	568.848
168.4	-26.5503	-2.74658	27.1606	68.3594	116.577	175.781	249.939	328.979	402.527	485.229	568.542
168.5	-25.6348	-2.13623	26.8555	68.3594	117.493	175.781	249.939	329.285	403.137	485.84	567.932
168.6	-25.0244	-2.13623	26.5503	68.3594	118.103	175.781	249.634	329.285	403.442	486.45	567.627
168.7	-25.0244	-2.74658	26.8555	68.3594	118.408	176.086	249.023	328.674	403.442	486.755	567.322
168.8	-25.3296	-3.35693	27.4658	68.3594	118.103	176.697	248.413	327.759	403.442	487.366	567.627
168.9	-25.6348	-3.66211	27.771	68.3594	117.798	177.307	248.413	326.843	403.442	487.671	567.627
169	-25.9399	-3.66211	27.4658	67.749	117.493	177.917	248.108	326.538	403.442	487.671	567.627
169.1	-26.2451	-3.66211	27.4658	67.4438	117.798	178.223	248.108	327.148	403.137	487.976	567.627
169.2	-26.5503	-3.66211	27.4658	67.749	118.103	178.223	248.413	327.759	402.527	487.671	567.627
169.3	-26.5503	-3.66211	27.4658	67.749	118.103	178.223	249.023	328.674	401.917	486.755	567.932
169.4	-26.2451	-3.66211	27.4658	67.4438	118.103	178.528	249.939	329.59	401.611	485.535	567.627
169.5	-25.9399	-3.05176	27.1606	67.4438	118.103	178.528	249.939	330.2	401.001	484.009	567.627
169.6	-25.9399	-2.44141	26.8555	67.1387	118.103	178.528	249.634	330.505	400.391	483.093	567.322
169.7	-25.9399	-2.44141	26.5503	66.8335	118.103	178.223	249.329	330.2	400.085	482.788	566.711
169.8	-26.2451	-2.74658	26.2451	66.5283	118.408	178.223	249.023	329.59	400.085	483.398	566.101
169.9	-26.5503	-3.05176	26.5503	66.5283	118.713	178.223	249.023	328.674	400.085	484.009	565.796
170	-26.5503	-3.35693	26.8555	66.5283	118.713	179.138	248.718	328.064	401.001	484.924	565.796
170.1	-26.5503	-3.35693	27.1606	66.5283	118.713	179.749	248.413	328.064	402.222	485.535	565.491
170.2	-26.5503	-3.05176	27.4658	66.5283	118.713	180.359	248.413	328.674	403.442	485.84	564.575
170.3	-26.5503	-2.74658	27.4658	66.5283	119.019	180.054	248.718	328.674	403.748	485.84	563.965
170.4	-26.5503	-2.44141	27.1606	66.5283	119.629	179.443	249.329	328.369	404.053	485.84	563.66
170.5	-26.5503	-2.74658	27.1606	67.1387	119.629	179.138	249.939	328.064	403.748	485.84	563.354
170.6	-26.5503	-2.74658	26.8555	67.4438	119.934	179.138	250.549	328.064	403.442	485.84	563.049
170.7	-26.5503	-3.05176	26.8555	67.749	119.934	179.138	251.16	327.759	403.442	485.84	562.744
170.8	-26.5503	-3.35693	26.8555	68.0542	119.934	178.528	251.16	327.759	403.748	485.84	562.439
170.9	-25.9399	-3.66211	26.8555	68.0542	119.629	177.917	250.854	328.369	404.053	485.84	562.134
171	-25.6348	-4.27246	27.1606	68.3594	119.324	177.307	250.854	328.674	403.748	485.535	561.829
171.1	-25.6348	-4.57764	27.1606	68.3594	119.019	177.002	251.465	328.369	404.053	485.229	561.829
171.2	-25.6348	-4.57764	26.8555	68.3594	118.713	177.612	251.465	328.064	404.053	485.229	561.829
171.3	-25.9399	-4.57764	26.8555	68.3594	118.408	177.917	251.465	327.759	404.053	484.924	561.829
171.4	-25.9399	-4.57764	26.2451	67.749	118.408	178.528	251.465	327.148	403.748	483.704	562.439
171.5	-25.9399	-4.57764	25.9399	67.4438	119.019	178.833	251.16	326.233	403.442	482.483	563.66
171.6	-25.9399	-4.27246	25.6348	67.4438	118.713	179.138	250.854	325.928	402.527	481.262	564.88
171.7	-26.2451	-3.96729	25.9399	67.1387	118.713	178.833	250.244	325.928	401.306	480.347	565.491
171.8	-27.1606	-3.96729	26.8555	67.1387	118.408	178.528	249.939	326.538	400.696	480.042	566.101
171.9	-28.0762	-3.66211	27.4658	67.4438	118.408	178.223	249.939	327.454	400.696	480.042	566.101
172	-28.9917	-3.66211	27.1606	67.749	118.713	178.528	249.329	328.369	401.306	480.652	565.796
172.1	-28.9917	-3.35693	26.8555	68.0542	119.324	178.833	248.718	328.369	402.222	481.567	565.491
172.2	-28.3813	-3.05176	26.5503	68.0542	119.629	179.138	248.413	328.064	403.442	482.178	565.186
172.3	-27.771	-2.44141	26.5503	68.0542	119.629	179.443	248.413	327.454	404.968	482.483	564.575
172.4	-27.1606	-2.13623	26.8555	67.749	119.324	179.138	248.718	327.148	405.579	482.178	564.88
172.5	-26.5503	-2.44141	27.1606	67.749	119.324	178.528	249.329	326.843	405.579	481.567	566.101
172.6	-26.5503	-3.05176	26.8555	67.749	119.324	177.917	249.939	326.843	405.273	480.347	567.627
172.7	-26.8555	-3.66211	26.2451	67.749	119.324	177.917	250.549	327.148	405.273	479.126	568.237
172.8	-27.1606	-4.27246	25.9399	68.0542	119.324	178.528	250.854	327.148	405.884	478.821	568.542
172.9	-27.1606	-4.27246	25.6348	68.0542	119.324	178.833	250.549	326.843	406.494	478.821	568.848
173	-27.1606	-4.27246	25.9399	68.0542	119.629	178.833	249.329	326.233	407.104	479.736	569.763
173.1	-26.5503	-3.96729	26.2451	68.0542	119.324	178.528	248.108	325.623	407.104	480.347	570.374
173.2	-26.2451	-3.35693	26.5503	68.0542	119.019	177.917	247.498	325.623	407.104	480.347	570.374
173.3	-25.9399	-3.05176	26.8555	67.749	118.713	177.917	247.498	325.623	407.715	479.736	569.763
173.4	-26.2451	-3.05176	26.8555	67.1387	118.408	177.917	247.803	325.623	408.325	479.126	568.237
173.5	-26.2451	-3.35693	26.2451	66.8335	118.103	178.223	247.803	325.317	408.63	478.821	567.017
173.6	-25.9399	-3.66211	25.9399	66.8335	118.103	178.528	248.108	324.707	408.936	479.431	566.101
173.7	-25.9399	-3.66211	25.9399	66.8335	118.408	178.223	248.413	323.792	408.936	480.347	565.491
173.8	-25.9399	-3.35693	26.5503	66.8335	119.019	178.223	248.718	323.181	408.63	481.567	565.186
173.9	-25.9399	-2.74658	27.1606	67.1387	119.629	178.223	249.329	322.876	407.715	482.483	565.491
174	-25.9399	-2.13623	27.1606	67.4438	119.934	177.917	250.244	323.181	406.799	483.093	565.491
174.1	-26.5503	-1.83105	26.8555	67.749	119.934	178.223	250.854	323.792	406.494	483.093	566.101
174.2	-26.5503	-2.13623	26.8555	67.749	119.934	178.528	250.854	323.792	406.189	482.788	566.406
174.3	-26.8555	-3.05176	27.1606	67.1387	119.629	178.833	250.549	324.097	406.189	482.178	566.101
174.4	-26.8555	-3.96729	27.4658	66.5283	119.324	179.138	250.244	324.402	406.494	482.178	565.796
174.5	-26.8555	-4.57764	27.771	66.2231	119.019	178.833	249.939	324.402	406.799	482.788	565.796
174.6	-26.8555	-4.57764	27.4658	66.2231	119.019	178.528	249.939	324.097	406.799	483.093	566.101
174.7	-26.8555	-4.57764	27.4658	66.2231	119.019	178.528	249.939	323.486	406.799	484.009	566.406
174.8	-26.5503	-4.27246	27.4658	66.2231	119.019	178.833	249.634	323.181	406.799	484.619	566.711
174.9	-26.5503	-4.27246	27.1606	66.2231	118.713	179.138	249.634	322.876	407.104	484.924	567.322
175	-26.8555	-3.96729	26.8555	65.918	118.713	179.443	249.329	323.181	407.41	484.619	567.627
175.1	-27.1606	-3.35693	25.9399	65.918	118.713	179.749	249.329	323.486	407.715	484.314	567.932
175.2	-27.4658	-3.05176	25.6348	65.918	118.713	179.443	249.634	323.486	408.325	484.009	568.237
175.3	-26.8555	-3.05176	25.6348	66.2231	118.103	178.833	249.329	323.486	408.63	483.704	567.932
175.4	-26.5503	-3.05176	25.9399	66.8335	118.408	178.223	249.023	323.486	408.936	484.009	567.627
175.5	-26.5503	-3.05176	26.2451	67.1387	119.019	178.223	248.718	323.792	408.936	484.619	567.017
175.6	-26.8555	-3.35693	26.8555	67.749	119.629	178.528	248.718	324.402	409.546	484.924	566.101
175.7	-27.1606	-3.35693	26.8555	68.3594	120.239	178.833	249.329	324.402	409.851	484.924	565.796
175.8	-27.1606	-3.35693	26.8555	68.3594	120.239	178.833	250.854	324.707	409.851	484.619	565.796
175.9	-27.1606	-3.05176	26.8555	68.0542	120.239	178.528	251.77	324.707	409.851	484.009	565.796
176	-27.1606	-2.74658	26.5503	67.749	119.629	177.917	252.38	325.012	410.156	483.093	565.491
176.1	-27.1606	-2.74658	26.2451	67.749	119.019	177.612	252.075	325.317	410.767	481.873	565.796
176.2	-27.4658	-3.05176	26.2451	67.4438	118.713	177.307	251.77	325.317	410.767	480.652	566.101
176.3	-27.4658	-3.66211	26.5503	67.749	119.019	177.612	252.075	324.707	410.461	479.126	567.017
176.4	-26.8555	-4.27246	26.8555	68.0542	119.019	177.917	252.686	324.402	410.156	478.516	567.322
176.5	-26.8555	-4.27246	27.1606	68.0542	119.324	177.917	253.296	323.792	410.156	477.905	567.322
176.6	-27.1606	-3.66211	27.1606	68.0542	119.324	177.917	253.601	323.486	410.461	477.295	567.322
176.7	-27.4658	-3.05176	27.4658	67.749	119.324	178.223	253.601	322.876	411.377	476.685	567.017
176.8	-27.4658	-2.44141	27.771	67.1387	119.324	178.223	253.296	322.571	411.987	476.379	566.711
176.9	-26.8555	-2.44141	27.4658	66.8335	119.324	178.223	252.38	323.181	411.987	476.379	566.711
177	-26.2451	-2.74658	26.8555	66.5283	119.019	177.917	251.77	323.792	412.292	476.99	566.406
177.1	-25.9399	-3.05176	26.2451	66.8335	119.019	177.917	251.77	324.402	411.987	477.6	565.796
177.2	-25.6348	-3.05176	25.9399	66.5283	119.019	177.917	251.77	325.317	411.682	478.516	565.796
177.3	-25.6348	-2.74658	25.9399	66.2231	119.019	177.917	251.77	325.623	411.072	480.042	565.796
177.4	-25.6348	-2.44141	26.2451	65.918	119.324	177.612	251.77	325.317	409.851	481.262	565.796
177.5	-25.6348	-2.13623	26.2451	66.2231	119.019	177.612	251.16	324.707	409.241	481.567	565.796
177.6	-25.9399	-2.44141	26.2451	66.2231	118.713	177.612	250.549	324.402	409.241	481.262	565.796
177.7	-26.2451	-2.74658	26.2451	66.2231	118.103	177.307	249.634	324.097	409.546	480.347	566.406
177.8	-26.5503	-3.05176	26.2451	65.918	117.798	176.697	249.329	324.097	410.156	479.736	567.017
177.9	-26.2451	-3.66211	25.9399	65.918	117.798	176.086	249.939	324.097	410.461	479.126	567.322
178	20.4468	39.0625	62.561	95.2148	134.888	176.086	235.596	298.462	376.587	438.538	524.292
178.1	647.583	571.289	483.398	392.151	298.462	176.697	80.5664	19.2261	-22.583	-68.0542	-73.5474
178.2	2089.23	1746.22	1382.14	1004.64	621.643	177.307	-232.239	-567.932	-888.977	-1200.26	-1458.74
178.3	3621.83	2969.67	2301.03	1618.35	935.974	177.612	-541.687	-1169.74	-1791.99	-2399.29	-2955.32
178.4	4539.79	3688.35	2830.81	1964.72	1105.96	177.307	-713.501	-1521.61	-2331.54	-3127.14	-3883.67
178.5	4672.85	3779.6	2889.1	1994.93	1111.76	176.697	-726.013	-1567.99	-2415.16	-3250.43	-4062.5
178.6	4244.08	3427.43	2618.41	1807.86	1008	176.697	-630.493	-1398.93	-2171.94	-2937.62	-3690.49
178.7	3568.42	2883.91	2207.64	1530.46	861.511	176.697	-491.638	-1136.47	-1784.36	-2428.89	-3065.49
178.8	2876.59	2331.54	1791.69	1251.83	718.079	176.697	-353.088	-868.225	-1385.5	-1902.16	-2412.41
178.9	2279.66	1856.08	1434.63	1014.1	597.534	176.697	-234.68	-636.902	-1040.65	-1444.4	-1842.96
179	1804.5	1477.97	1150.82	825.806	502.93	176.697	-140.381	-452.881	-765.076	-1078.49	-1386.72
179.1	1438.29	1186.22	932.617	681.152	430.603	177.307	-67.749	-310.974	-552.368	-796.204	-1034.24
179.2	1157.53	963.135	765.686	570.679	375.061	178.528	-12.207	-202.332	-389.099	-579.834	-764.465
179.3	942.383	791.626	637.512	486.145	333.252	178.833	30.2124	-119.019	-263.977	-414.124	-557.251
179.4	776.672	658.875	538.94	420.837	300.903	178.528	63.1714	-54.9316	-167.847	-286.255	-397.644
179.5	648.193	556.03	462.952	370.789	275.574	178.223	88.501	-5.49316	-93.9941	-187.073	-274.353
179.6	549.011	477.295	404.663	332.031	255.432	178.528	108.032	32.3486	-36.9263	-110.168	-179.443
179.7	472.107	417.175	360.107	301.514	239.868	178.528	123.291	61.9507	6.71387	-50.9644	-106.506
179.8	413.208	371.399	325.623	277.1	227.966	178.528	135.193	84.5337	40.8936	-5.79834	-50.9644
179.9	368.042	336.304	298.462	258.789	219.421	178.223	144.043	102.234	66.8335	28.3813	-8.54492
180	333.252	308.838	277.1	244.446	212.402	178.223	150.452	115.967	86.9751	54.3213	24.4141
180.1	307.007	287.17	260.925	233.765	206.909	178.223	155.334	127.258	102.234	74.7681	50.6592
180.2	286.255	270.081	248.413	225.525	202.332	178.528	159.302	136.108	113.831	91.5527	71.106
180.3	270.081	257.263	238.953	219.116	198.975	178.833	162.354	143.127	123.291	104.675	86.3647
180.4	257.568	246.582	231.934	213.928	196.533	178.833	165.1	148.621	130.92	115.051	98.2666
180.5	247.498	238.037	226.746	209.351	195.007	178.223	167.236	152.893	137.024	123.291	108.337
180.6	239.258	231.018	222.168	205.994	194.092	177.917	169.067	155.945	141.907	129.7	116.577
180.7	232.849	225.525	218.201	203.552	193.481	177.612	170.288	158.081	145.874	134.583	123.291
180.8	227.661	221.558	215.149	201.416	192.566	177.612	171.509	159.607	148.621	137.939	127.869
180.9	224.304	218.506	212.097	199.89	191.956	178.223	172.119	161.133	150.757	140.686	131.226
181	221.558	216.37	209.656	198.669	191.04	178.528	172.119	162.354	152.283	142.822	133.667
181.1	219.116	214.539	208.13	197.754	190.125	178.528	171.814	163.879	153.809	144.958	135.498
181.2	216.98	213.013	207.214	197.144	189.209	178.223	171.509	164.795	155.029	146.484	137.024
181.3	215.149	211.182	206.299	196.533	188.293	177.307	172.119	165.1	155.945	147.705	138.855
181.4	213.928	209.351	205.383	195.923	187.683	177.002	173.035	165.1	156.86	148.926	140.991
181.5	212.402	207.52	204.163	195.312	187.683	177.002	173.645	165.1	157.166	150.146	142.822
181.6	211.487	205.994	203.247	194.397	187.683	177.307	173.95	165.1	157.166	151.367	144.653
181.7	210.876	205.078	202.637	193.787	187.378	177.307	174.255	165.71	157.471	152.588	146.179
181.8	209.961	204.163	202.026	193.787	186.768	177.307	174.561	166.016	158.081	153.198	147.095
181.9	209.045	203.552	201.111	194.092	186.157	177.307	174.866	166.626	158.691	153.809	148.315
182	207.214	202.942	200.5	193.787	185.547	177.612	175.171	166.931	159.607	154.114	149.231
182.1	205.383	202.637	199.89	193.176	185.242	178.223	175.476	167.236	160.217	154.114	150.146
182.2	203.247	202.637	199.585	192.871	185.242	178.528	175.781	167.236	160.217	154.114	151.367
182.3	202.026	202.637	199.28	192.871	185.547	178.528	176.086	166.931	160.522	154.419	151.978
182.4	201.721	202.637	198.669	192.871	185.547	178.223	175.781	166.626	160.522	155.029	152.588
182.5	201.721	202.332	198.059	193.176	185.547	177.612	175.781	166.321	161.133	155.64	153.198
182.6	202.332	202.026	197.144	193.481	185.242	177.002	175.781	166.321	161.438	155.64	153.503
182.7	202.026	201.721	196.228	193.176	184.631	177.002	175.781	166.626	162.048	155.945	153.809
182.8	201.416	201.416	195.618	192.871	184.021	177.307	175.476	167.236	162.659	156.25	154.114
182.9	201.111	201.111	195.007	192.566	183.716	177.612	175.171	167.542	162.659	156.86	154.724
183	200.806	200.806	194.702	191.956	183.105	177.612	174.866	168.152	162.964	157.166	155.334
183.1	200.195	200.5	194.702	191.65	182.495	177.917	174.255	168.457	162.964	157.776	155.64
183.2	199.28	199.89	194.702	191.345	181.885	178.223	173.95	169.067	162.964	158.081	155.64
183.3	198.059	199.28	194.702	191.65	182.19	178.223	174.255	169.678	162.964	158.386	155.334
183.4	197.144	198.975	194.397	192.261	182.8	178.528	174.561	169.983	163.269	158.691	155.334
183.5	196.533	198.059	194.092	191.956	183.716	178.833	174.866	169.983	162.964	158.386	155.334
183.6	195.923	197.144	194.092	191.04	184.326	179.138	174.866	169.678	162.659	158.386	155.64
183.7	195.312	196.533	194.092	189.819	184.326	179.138	175.171	169.373	162.354	158.691	155.945
183.8	194.397	196.228	194.092	188.599	184.021	179.443	175.476	169.373	162.354	158.997	156.25
183.9	193.787	196.228	194.092	188.293	183.411	180.054	175.476	169.373	162.659	159.302	156.555
184	193.481	196.228	194.092	188.293	183.105	180.054	175.171	169.983	162.964	158.997	156.86
184.1	193.176	195.923	193.787	188.293	183.105	180.054	175.171	170.593	163.574	158.081	156.86
184.2	193.176	195.618	193.481	188.293	183.411	179.443	175.476	171.509	163.879	157.776	156.86
184.3	193.481	195.007	192.871	188.599	183.411	178.528	175.781	172.119	164.185	158.081	156.86
184.4	194.092	194.702	192.871	188.904	183.411	177.917	176.086	171.814	164.49	159.607	157.166
184.5	194.397	194.092	192.871	189.209	183.105	177.307	175.781	171.814	164.795	161.133	157.471
184.6	195.007	193.481	193.176	189.209	182.8	177.002	175.781	171.509	165.405	162.354	158.081
184.7	195.007	193.481	193.481	188.904	182.495	177.612	175.781	171.509	165.71	162.964	158.691
184.8	195.312	193.176	193.481	188.599	182.8	178.528	175.781	171.204	166.016	162.964	158.997
184.9	195.007	193.176	193.787	188.293	183.716	179.138	176.086	171.204	166.626	162.964	159.302
185	194.702	192.566	193.481	187.988	184.631	179.443	176.086	171.509	166.931	163.269	158.997
185.1	194.397	192.261	192.871	187.683	185.242	179.443	175.781	171.814	166.626	163.574	158.997
185.2	193.787	191.956	192.261	187.378	185.242	179.749	174.866	171.814	166.321	163.879	158.997
185.3	192.871	191.65	191.956	187.378	184.631	179.749	173.95	171.814	166.321	163.879	158.997
185.4	191.956	191.956	192.261	187.378	183.716	179.443	173.645	171.509	166.626	164.185	158.691
185.5	191.345	191.956	192.261	187.683	183.105	179.138	173.645	171.814	166.626	164.795	158.386
185.6	190.43	192.261	192.261	187.378	182.8	179.138	174.255	172.119	166.931	165.1	158.691
185.7	190.43	191.956	192.261	187.683	182.495	179.138	174.561	172.119	167.542	165.405	159.912
185.8	190.735	191.345	191.956	187.988	182.495	179.443	175.171	172.119	167.847	165.405	161.133
185.9	190.735	190.735	191.65	188.293	182.19	180.054	175.781	172.119	167.542	165.71	162.354
186	191.04	190.735	191.65	188.599	182.495	180.054	176.392	172.424	167.542	166.016	162.964
186.1	190.735	190.735	191.65	188.599	182.8	179.443	176.697	172.424	167.542	166.016	162.964
186.2	190.43	190.735	191.956	188.293	183.105	178.528	176.697	172.424	167.542	165.71	162.659
186.3	189.514	190.735	191.956	187.683	182.8	177.917	176.697	172.424	167.542	165.71	162.964
186.4	188.293	190.43	191.345	187.073	182.495	177.612	176.086	172.424	167.847	165.405	162.964
186.5	187.073	190.735	191.04	186.157	182.495	177.917	176.086	172.424	168.457	165.405	163.574
186.6	186.462	190.735	190.735	185.242	182.19	178.833	176.392	172.424	168.762	165.71	163.879
186.7	186.768	190.735	191.04	184.937	182.495	179.749	176.697	172.729	169.067	166.016	164.185
186.8	187.073	190.43	191.345	184.937	183.105	180.359	176.697	173.34	168.762	166.016	163.879
186.9	187.683	189.819	190.735	185.547	184.326	180.664	176.392	173.645	168.762	165.71	163.879
187	187.988	189.209	189.819	185.547	184.631	180.359	175.781	174.255	168.762	165.405	163.879
187.1	187.988	188.599	189.209	185.547	184.326	180.054	175.781	174.561	169.067	164.795	164.185
187.2	187.378	187.988	189.514	185.547	184.021	179.749	175.476	174.561	168.762	165.1	164.185
187.3	186.462	187.988	189.819	184.937	184.021	179.443	174.866	173.95	169.067	166.321	164.49
187.4	185.852	187.988	189.819	184.631	184.326	179.443	174.561	173.34	169.678	167.236	164.49
187.5	185.547	188.293	189.209	184.326	184.937	179.443	174.561	173.34	170.288	167.847	164.795
187.6	185.242	187.988	188.599	184.631	184.937	179.443	174.866	173.95	170.593	167.542	164.795
187.7	185.242	187.683	187.988	184.631	184.631	179.138	175.476	174.255	170.593	167.236	164.795
187.8	185.547	187.683	187.683	184.326	184.326	178.528	176.086	174.561	169.983	166.931	165.1
187.9	185.852	187.988	187.683	184.021	183.411	178.528	176.697	174.866	169.678	167.236	165.71
188	185.547	188.599	187.683	183.716	182.8	178.833	176.392	175.171	169.373	167.542	166.016
188.1	185.852	188.599	187.683	184.326	182.8	178.833	176.086	175.781	169.067	167.847	166.016
188.2	185.547	188.293	187.683	185.242	182.8	179.138	175.781	175.781	169.067	167.847	166.016
188.3	185.242	187.683	187.378	186.462	182.8	179.443	175.781	175.476	169.678	168.152	166.016
188.4	184.937	187.073	187.683	186.768	182.8	179.749	176.086	174.866	170.288	168.152	165.71
188.5	184.631	186.462	188.293	186.768	182.8	180.054	176.697	174.255	170.898	167.847	166.016
188.6	184.021	186.768	188.904	187.073	182.8	180.359	177.612	174.255	171.204	167.542	166.016
188.7	183.411	187.378	188.904	187.073	183.105	180.969	178.528	174.561	171.204	167.236	166.626
188.8	183.105	187.683	188.293	187.073	183.411	180.969	179.138	174.561	170.898	167.236	166.931
188.9	183.411	187.683	187.683	186.768	183.105	180.664	179.443	174.255	171.204	167.542	166.931
189	183.716	187.378	187.073	186.462	182.495	180.359	179.749	174.255	171.814	167.847	166.626
189.1	183.716	187.073	187.073	186.157	182.495	180.054	180.054	174.561	172.424	168.457	166.321
189.2	183.716	186.768	187.073	185.547	182.19	179.443	179.443	175.476	172.424	168.762	166.016
189.3	183.716	186.462	187.683	185.242	181.58	178.833	178.833	175.781	172.119	168.762	166.016
189.4	184.326	186.462	188.293	185.547	180.969	178.223	178.223	176.086	171.814	168.762	166.626
189.5	184.937	186.157	188.599	185.852	180.969	178.223	177.612	176.086	171.814	168.457	167.236
189.6	185.547	185.852	188.904	186.462	181.885	178.528	177.002	176.086	172.119	168.152	167.847
189.7	185.547	185.852	188.904	186.462	182.495	178.833	177.307	176.086	172.424	168.152	167.542
189.8	185.547	185.852	188.904	186.462	182.8	179.443	177.612	175.476	172.424	168.152	167.236
189.9	185.547	185.547	189.209	186.157	182.495	180.054	178.223	174.561	172.119	168.457	166.626
190	185.242	185.242	189.209	186.157	181.885	180.359	178.528	173.95	171.814	169.067	166.321
190.1	184.937	184.937	188.904	185.852	181.274	180.664	178.833	174.255	171.509	169.373	166.321
190.2	184.937	184.937	188.293	185.547	180.969	180.359	179.443	174.866	171.509	169.373	166.626
190.3	184.937	185.242	187.378	184.937	180.664	180.359	180.054	175.171	171.814	169.678	166.626
190.4	184.937	185.547	187.073	184.631	181.274	179.749	180.054	175.476	172.424	169.678	166.626
190.5	184.937	185.547	186.768	184.631	181.885	179.443	179.749	175.781	173.035	169.373	166.931
190.6	184.326	185.242	186.768	184.937	182.8	179.138	179.443	175.476	173.645	168.457	167.236
190.7	184.021	184.937	187.073	184.937	183.716	179.138	179.138	175.781	173.34	168.152	167.236
190.8	183.411	184.631	186.768	184.937	184.021	179.443	179.443	176.086	173.035	167.847	167.236
190.9	183.411	184.631	186.462	184.326	183.411	179.443	179.443	176.392	172.424	168.457	167.236
191	183.105	184.937	186.157	184.021	182.8	179.749	179.443	176.392	172.424	169.067	166.626
191.1	182.8	184.937	186.157	183.105	182.19	180.054	179.443	176.392	173.035	169.678	166.626
191.2	182.495	184.937	186.462	182.8	181.885	180.054	179.138	176.392	173.34	169.678	166.931
191.3	182.19	184.631	186.157	182.495	181.885	180.054	179.443	176.392	173.645	169.373	167.542
191.4	181.885	183.716	185.547	182.495	182.19	180.054	179.749	177.002	173.645	169.678	168.762
191.5	181.885	183.105	184.631	182.495	183.105	180.054	180.054	177.307	173.645	169.983	169.373
191.6	181.885	182.8	183.411	182.495	183.411	180.054	180.054	177.612	173.645	170.288	169.983
191.7	181.885	182.8	183.105	182.8	183.411	180.359	179.749	177.002	173.95	170.288	170.288
191.8	181.58	182.8	183.411	183.411	183.411	180.969	179.749	176.697	174.255	170.593	170.288
191.9	180.969	182.8	184.021	183.716	183.411	181.58	179.443	176.697	174.561	170.593	170.593
192	180.664	182.8	184.631	184.021	183.411	181.885	179.138	176.392	174.866	170.593	170.288
192.1	180.664	182.8	184.937	184.021	183.105	181.885	178.528	176.086	174.866	170.593	169.678
192.2	180.359	182.495	185.242	184.021	182.495	181.58	177.917	175.781	174.561	170.593	169.067
192.3	180.359	182.19	184.937	184.021	182.495	180.969	177.612	175.476	174.255	170.898	169.067
192.4	180.664	181.58	184.937	183.716	182.8	180.359	177.612	175.171	173.95	171.509	169.373
192.5	180.969	181.274	184.937	183.716	183.716	180.054	177.612	174.561	173.645	172.119	169.678
192.6	181.274	180.664	185.242	183.411	183.716	179.749	177.612	174.561	173.645	172.424	169.373
192.7	181.274	180.359	185.547	183.105	183.105	179.443	177.307	174.561	173.645	172.424	168.762
192.8	181.58	180.054	185.852	183.105	182.495	179.138	177.307	174.866	173.645	171.814	168.152
192.9	181.885	180.054	186.157	182.8	181.885	178.833	177.917	174.866	173.95	171.204	167.847
193	182.19	180.664	185.852	182.495	181.58	178.528	178.528	174.866	173.95	170.898	168.152
193.1	182.495	180.664	185.852	182.19	181.274	178.528	178.833	174.866	173.035	170.898	168.457
193.2	182.495	180.664	185.852	181.885	180.969	178.528	178.833	174.866	172.729	171.814	169.067
193.3	181.885	180.969	186.157	181.58	180.359	178.528	178.528	175.781	172.729	172.729	169.373
193.4	180.969	181.58	186.462	181.58	179.749	178.223	178.528	176.697	173.34	173.34	169.678
193.5	180.359	182.19	186.768	181.58	179.443	177.612	178.833	177.307	173.95	173.645	169.983
193.6	180.054	182.19	186.768	181.885	180.054	177.307	179.138	177.612	173.95	173.645	170.288
193.7	180.664	182.19	186.768	182.19	180.969	177.917	179.443	177.917	173.95	173.645	170.288
193.8	181.274	182.19	187.073	182.19	181.885	179.138	179.443	177.917	174.255	173.34	169.983
193.9	181.885	182.495	187.073	181.58	182.8	180.054	179.443	177.917	174.561	173.34	169.983
194	181.58	182.8	187.073	181.885	183.411	180.969	179.443	177.917	174.255	173.34	169.983
194.1	181.274	182.495	187.073	182.495	183.716	180.664	179.749	178.223	173.95	173.645	169.983
194.2	180.969	182.19	186.768	183.411	184.021	180.359	180.054	178.528	174.255	173.645	169.373
194.3	181.274	181.885	186.768	184.021	184.326	179.749	180.054	178.528	174.866	173.95	169.067
194.4	181.274	181.58	187.378	184.631	184.326	178.833	180.054	178.528	174.866	174.255	169.067
194.5	181.274	181.885	187.683	184.631	183.716	178.223	179.443	178.223	174.255	174.561	169.373
194.6	180.969	182.19	187.683	184.631	183.105	178.223	178.833	177.917	173.645	174.866	169.373
194.7	180.359	182.495	187.683	184.326	182.495	178.528	178.528	177.917	173.645	175.171	169.373
194.8	179.749	182.19	187.378	184.021	182.19	179.138	178.833	178.223	173.95	175.171	169.983
194.9	179.443	181.885	186.768	184.021	182.495	179.138	179.138	178.223	173.645	174.866	171.204
195	178.833	181.58	185.852	184.021	182.8	178.833	179.138	178.223	173.645	173.95	172.729
195.1	178.528	181.274	185.242	184.021	183.411	178.833	179.138	178.528	173.95	173.035	173.035
195.2	178.223	181.274	184.326	184.326	183.716	178.833	178.833	178.528	173.95	173.035	172.729
195.3	178.223	181.274	184.326	184.021	183.716	179.443	179.138	178.833	174.561	173.035	172.424
195.4	178.223	181.274	184.021	183.411	183.716	179.749	179.443	179.138	175.171	173.035	172.424
195.5	178.528	181.274	184.021	182.8	183.411	179.443	179.749	179.749	175.476	173.035	172.729
195.6	178.528	180.969	184.021	182.8	183.105	178.833	179.749	180.054	175.476	173.035	172.729
195.7	178.833	180.664	184.631	182.8	182.8	178.223	180.054	179.749	174.866	172.729	172.729
195.8	179.138	180.054	184.937	183.411	182.8	178.223	179.749	179.443	174.866	172.729	172.729
195.9	179.443	179.443	184.631	183.716	183.105	178.528	179.443	179.443	174.866	172.729	172.424
196	179.443	178.833	183.716	184.021	183.716	178.833	179.443	179.749	174.866	173.035	172.729
196.1	179.443	178.528	183.105	184.021	184.326	178.528	179.138	180.054	174.255	173.34	173.035
196.2	179.138	178.528	182.8	184.326	184.021	178.223	179.443	180.054	173.95	173.95	173.645
196.3	178.833	178.528	183.105	184.631	183.411	178.223	179.749	180.054	173.95	174.561	174.255
196.4	179.138	179.138	183.716	184.326	182.8	178.528	180.054	180.054	174.255	174.866	174.561
196.5	179.443	179.749	183.105	184.021	182.19	178.833	180.054	180.359	174.561	174.866	174.866
196.6	179.749	180.969	182.495	183.716	181.274	178.833	179.749	180.054	174.866	174.866	174.561
196.7	180.359	180.969	182.19	183.411	180.969	178.833	179.443	180.054	174.561	175.476	174.255
196.8	180.664	180.359	181.885	183.716	180.969	178.833	179.443	179.749	173.95	175.781	173.95
196.9	180.359	179.749	181.58	183.716	181.58	178.528	179.443	179.443	173.95	176.392	173.645
197	179.443	178.833	181.58	183.716	182.19	178.528	180.054	179.443	173.95	177.002	173.035
197.1	178.833	178.223	181.58	183.411	182.19	178.528	180.359	179.443	174.255	176.697	172.424
197.2	178.223	178.223	181.885	183.105	182.19	178.833	180.359	179.443	174.866	176.086	172.119
197.3	177.612	178.223	182.19	183.105	181.885	179.443	180.054	179.138	174.561	175.171	171.814
197.4	177.307	178.223	182.19	183.105	181.274	179.749	179.749	179.138	174.561	174.866	171.509
197.5	177.612	177.917	182.8	183.105	180.969	179.749	179.749	179.443	174.561	175.171	171.509
197.6	178.223	177.612	183.411	183.105	180.359	179.749	179.749	179.443	174.866	175.781	172.119
197.7	179.138	177.917	183.716	183.411	180.054	179.138	179.443	179.138	175.476	176.392	172.729
197.8	179.443	178.223	183.716	184.021	179.749	178.528	179.138	179.138	175.476	176.392	172.729
197.9	179.138	178.528	183.411	184.631	180.054	178.528	178.833	178.833	175.781	176.086	172.424
198	179.138	178.833	182.8	184.631	180.359	178.833	179.138	179.138	175.476	175.781	172.119
198.1	179.138	179.138	182.495	184.631	180.359	179.443	179.443	179.749	175.476	175.476	172.729
198.2	179.138	178.833	182.495	184.631	180.664	180.054	179.749	180.054	175.476	175.171	173.34
198.3	179.138	177.917	182.8	184.326	180.969	180.359	180.054	180.359	175.781	175.476	173.95
198.4	179.138	177.612	183.105	183.716	181.274	180.359	180.054	180.664	175.171	175.781	174.255
198.5	179.138	177.612	183.716	183.411	181.58	180.359	179.749	181.274	174.561	176.086	173.95
198.6	178.833	177.917	183.716	183.105	181.885	180.359	180.054	180.969	174.255	175.781	173.035
198.7	178.528	178.833	184.021	183.105	181.885	180.664	180.664	180.969	174.255	175.476	172.424
198.8	178.528	179.443	184.631	182.8	181.274	180.969	180.969	180.664	175.171	175.476	171.509
198.9	177.917	180.054	184.631	182.8	180.969	181.274	180.969	180.359	175.781	175.476	171.204
199	177.612	180.664	184.631	182.8	180.359	181.274	180.664	180.359	176.086	175.476	170.898
199.1	177.002	180.969	184.631	183.105	180.359	180.969	180.054	180.054	176.086	175.171	171.204
199.2	176.392	180.969	184.326	183.105	180.054	180.359	179.443	180.054	176.086	174.866	171.814
199.3	176.392	180.664	183.716	183.105	180.359	179.138	179.138	180.359	176.086	174.866	172.119
199.4	176.392	180.664	183.411	183.411	180.664	178.833	178.833	180.359	176.086	174.866	171.814
199.5	176.697	180.359	183.716	183.411	181.274	178.528	178.833	180.664	176.086	174.866	171.204
199.6	177.307	180.359	184.021	183.411	181.58	178.833	178.833	180.969	176.086	174.866	171.509
199.7	177.917	180.359	184.326	183.411	181.58	179.443	178.528	180.969	176.086	174.866	172.119
199.8	178.223	180.054	184.326	183.411	181.58	180.054	178.528	180.664	175.476	175.171	173.035
199.9	177.612	180.054	184.631	183.411	181.58	180.359	178.223	180.054	174.866	176.086	173.34
[truncated: 1 more rows]

## Sheet: figureA_AP6
Time (ms)	Im_scaled (nA)	Im_scaled (nA)	Im_scaled (nA)	Im_scaled (nA)	Im_scaled (pA)	Im_scaled (pA)	Im_scaled (pA)	Im_scaled (nA)	Im_scaled (nA)	Im_scaled (nA)	Im_scaled (nA)
0.1	13.7329	13.1226	11.5967	10.376	10.9863	10.0708	10.376	10.6812	10.0708	10.376	10.0708
0.2	14.0381	13.1226	11.5967	10.376	10.9863	10.376	11.2915	10.6812	9.76562	10.376	10.0708
0.3	13.4277	12.8174	12.207	10.6812	10.9863	10.0708	11.5967	10.376	9.46045	10.0708	10.0708
0.4	12.8174	12.5122	13.1226	11.2915	10.9863	10.376	11.2915	9.76562	8.8501	9.46045	10.0708
0.5	12.207	12.5122	13.7329	11.9019	10.9863	10.6812	10.9863	9.15527	8.8501	9.15527	9.76562
0.6	12.207	12.8174	14.0381	12.207	10.9863	10.9863	10.376	9.15527	9.46045	9.46045	9.46045
0.7	12.5122	13.4277	13.4277	12.8174	11.2915	11.2915	10.0708	9.46045	10.376	9.76562	9.15527
0.8	13.1226	13.4277	12.5122	12.8174	10.9863	10.9863	10.0708	9.76562	10.6812	10.0708	8.8501
0.9	13.1226	12.8174	11.9019	12.5122	10.6812	10.9863	10.376	9.76562	10.6812	9.76562	8.8501
1	12.8174	12.5122	11.9019	12.207	10.0708	10.6812	10.0708	9.76562	10.376	9.46045	9.15527
1.1	12.5122	12.5122	12.207	11.9019	9.76562	10.6812	10.0708	10.0708	10.0708	9.15527	9.15527
1.2	12.8174	12.5122	12.5122	11.5967	10.0708	10.6812	9.76562	10.0708	9.46045	9.15527	8.8501
1.3	13.1226	12.5122	12.5122	11.2915	10.0708	10.9863	9.76562	10.0708	9.76562	9.15527	8.8501
1.4	13.1226	12.8174	12.207	11.2915	10.376	11.2915	10.0708	10.0708	10.0708	9.46045	8.8501
1.5	12.8174	13.1226	11.9019	11.5967	10.9863	11.5967	10.376	10.0708	10.376	9.15527	8.8501
1.6	12.207	12.8174	11.9019	11.2915	11.5967	11.5967	10.9863	10.376	10.6812	9.15527	9.15527
1.7	12.207	12.8174	12.207	10.9863	12.207	10.9863	11.5967	10.0708	10.6812	9.15527	9.46045
1.8	12.5122	12.8174	12.207	10.6812	12.5122	10.6812	12.207	10.0708	10.6812	9.46045	9.46045
1.9	13.1226	12.5122	12.207	10.6812	12.207	10.376	12.207	9.76562	10.0708	9.76562	9.46045
2	13.4277	12.207	12.207	10.9863	11.9019	10.6812	11.2915	9.46045	9.46045	9.76562	9.15527
2.1	13.1226	11.5967	12.5122	11.2915	11.5967	10.6812	10.6812	9.46045	8.8501	9.46045	8.8501
2.2	12.8174	11.2915	12.8174	11.9019	11.2915	10.6812	10.0708	9.46045	8.8501	9.46045	9.15527
2.3	12.5122	11.2915	12.5122	12.5122	10.9863	10.6812	9.46045	9.15527	9.46045	9.76562	9.76562
2.4	12.207	11.5967	11.9019	12.8174	10.9863	10.6812	9.46045	9.15527	10.0708	10.0708	10.376
2.5	11.9019	11.9019	11.2915	12.5122	11.2915	10.6812	9.46045	8.8501	10.0708	10.0708	10.376
2.6	11.2915	12.5122	11.5967	12.207	11.2915	10.376	9.76562	8.8501	9.46045	10.0708	10.376
2.7	11.5967	12.8174	11.9019	11.5967	11.5967	10.0708	10.0708	9.46045	8.8501	10.376	9.76562
2.8	11.9019	13.1226	11.9019	11.2915	11.2915	10.0708	10.0708	9.46045	8.54492	10.376	9.15527
2.9	12.207	13.1226	11.9019	10.9863	10.9863	10.0708	9.76562	9.76562	8.54492	10.376	8.8501
3	12.207	12.8174	11.9019	10.9863	10.6812	10.0708	9.76562	10.0708	8.54492	10.0708	9.15527
3.1	12.207	12.5122	11.9019	11.2915	10.376	10.0708	10.0708	10.376	8.8501	10.0708	9.76562
3.2	12.207	11.9019	12.207	11.5967	10.0708	10.0708	10.0708	10.9863	9.46045	10.0708	10.376
3.3	12.207	11.5967	12.5122	11.2915	9.46045	10.376	9.76562	10.9863	9.76562	9.76562	10.376
3.4	11.9019	11.9019	12.8174	10.9863	9.76562	10.376	9.46045	10.6812	10.376	9.46045	10.376
3.5	11.9019	12.207	12.5122	10.9863	10.6812	10.6812	9.76562	10.376	10.9863	9.15527	10.0708
3.6	11.9019	12.5122	12.207	10.9863	11.5967	10.9863	10.0708	10.6812	11.5967	9.15527	9.15527
3.7	12.5122	12.207	11.9019	11.2915	12.207	11.5967	10.6812	10.9863	11.5967	9.76562	8.54492
3.8	13.4277	12.207	12.207	11.2915	12.5122	12.5122	10.6812	10.9863	11.2915	10.0708	7.93457
3.9	13.4277	12.5122	12.207	11.2915	12.207	12.5122	10.376	11.2915	10.9863	9.76562	7.62939
4	13.1226	12.8174	12.5122	11.5967	12.207	12.207	10.0708	10.9863	10.376	9.46045	8.23975
4.1	12.8174	12.8174	12.5122	11.9019	11.9019	11.5967	9.76562	10.6812	10.0708	9.46045	9.15527
4.2	12.5122	12.5122	12.5122	12.5122	11.9019	10.9863	10.0708	10.376	10.0708	10.0708	10.376
4.3	12.207	12.5122	12.5122	12.207	11.5967	10.376	10.376	10.0708	10.0708	10.376	10.376
4.4	12.5122	12.8174	12.207	11.9019	11.2915	9.76563	10.376	10.0708	10.6812	9.76562	9.46045
4.5	13.1226	13.1226	11.5967	11.9019	11.5967	9.76563	10.6812	10.376	11.2915	8.8501	8.54492
4.6	13.4277	13.1226	11.5967	11.9019	11.5967	9.76563	10.6812	10.376	10.6812	8.23975	8.23975
4.7	13.4277	12.5122	11.5967	11.5967	11.5967	10.0708	10.9863	10.376	10.0708	8.54492	8.23975
4.8	13.4277	11.9019	11.9019	10.9863	11.2915	10.376	11.2915	9.76562	9.15527	9.15527	8.54492
4.9	13.1226	11.9019	11.9019	10.376	10.9863	11.5967	10.9863	9.46045	9.15527	9.46045	8.8501
5	12.8174	11.9019	12.207	10.6812	10.9863	12.5122	10.376	9.76562	9.46045	9.76562	9.15527
5.1	12.207	11.9019	12.207	11.2915	11.2915	12.5122	9.76562	9.76562	9.76562	9.76562	9.76562
5.2	11.5967	12.207	12.207	11.9019	11.2915	12.207	10.0708	9.46045	9.46045	9.76562	10.0708
5.3	11.5967	12.5122	12.8174	11.5967	10.9863	11.2915	10.6812	8.8501	9.15527	9.46045	10.376
5.4	11.5967	13.1226	12.8174	10.9863	10.376	10.376	11.2915	8.54492	9.15527	9.46045	10.376
5.5	12.207	13.4277	12.207	10.6812	10.0708	10.0708	11.2915	8.23975	9.46045	9.46045	10.0708
5.6	13.1226	13.1226	11.9019	10.6812	9.76562	9.76563	10.9863	9.15527	9.46045	9.76562	9.46045
5.7	13.4277	12.207	11.5967	11.2915	9.46045	9.76563	10.376	10.0708	9.46045	10.0708	8.8501
5.8	13.1226	11.5967	11.2915	11.5967	9.76562	9.76563	9.76562	10.376	9.15527	10.376	8.23975
5.9	12.5122	11.5967	11.2915	12.207	10.376	9.76563	9.46045	10.6812	9.15527	10.0708	7.93457
6	11.5967	12.207	11.2915	12.207	10.6812	10.0708	9.76562	10.376	9.15527	9.76562	7.93457
6.1	11.2915	12.8174	11.9019	11.9019	11.2915	10.376	10.0708	10.0708	9.76562	9.46045	8.23975
6.2	10.9863	12.8174	12.5122	11.2915	11.2915	10.376	10.376	10.0708	10.0708	9.46045	8.54492
6.3	11.5967	12.8174	12.8174	11.2915	11.2915	10.376	10.376	9.76562	10.0708	9.46045	8.8501
6.4	12.207	12.5122	13.1226	10.9863	11.2915	9.76563	10.376	9.46045	10.0708	9.76562	8.8501
6.5	13.1226	12.8174	12.8174	10.9863	11.2915	9.46045	10.0708	8.8501	9.46045	9.76562	9.15527
6.6	13.7329	12.8174	12.5122	10.9863	11.2915	9.76563	10.376	8.54492	9.15527	9.76562	8.8501
6.7	13.7329	12.8174	11.9019	10.9863	11.2915	10.0708	10.6812	8.54492	9.46045	9.76562	8.54492
6.8	13.4277	12.207	11.5967	10.9863	11.2915	10.376	10.9863	9.15527	9.76562	10.0708	8.54492
6.9	13.1226	11.5967	11.5967	10.9863	10.9863	10.376	10.9863	10.0708	9.76562	10.376	8.54492
7	12.8174	10.9863	11.9019	11.2915	10.376	10.376	10.9863	10.376	9.46045	10.376	8.8501
7.1	12.5122	10.9863	12.5122	11.5967	9.76562	10.6812	10.6812	10.376	9.46045	9.76562	9.46045
7.2	12.5122	11.2915	12.8174	11.5967	9.76562	10.6812	10.0708	10.376	9.46045	9.15527	10.0708
7.3	12.5122	11.5967	12.5122	11.2915	10.0708	10.6812	9.76562	10.0708	9.76562	8.8501	10.376
7.4	12.5122	11.5967	12.5122	10.9863	10.6812	10.6812	10.0708	9.76562	10.376	8.8501	10.376
7.5	12.5122	11.5967	12.207	10.9863	10.9863	10.376	10.0708	9.15527	10.6812	8.8501	10.0708
7.6	12.207	11.5967	12.207	10.6812	11.2915	10.0708	10.0708	8.8501	10.9863	9.15527	10.0708
7.7	12.207	12.207	12.5122	10.376	11.9019	10.0708	10.0708	8.8501	10.6812	9.46045	9.46045
7.8	11.9019	12.5122	12.5122	10.6812	11.9019	10.0708	10.0708	9.15527	10.0708	9.46045	9.15527
7.9	11.5967	12.5122	12.207	10.9863	11.5967	10.376	10.0708	9.46045	8.8501	9.15527	9.15527
8	11.9019	12.5122	12.207	11.2915	11.5967	10.6812	10.0708	10.0708	8.54492	8.54492	9.46045
8.1	12.5122	12.207	12.207	11.9019	11.5967	10.6812	9.76562	10.0708	8.54492	8.54492	10.0708
8.2	13.1226	12.207	12.5122	12.207	11.5967	10.6812	9.76562	10.0708	8.8501	8.23975	10.0708
8.3	13.1226	11.9019	12.8174	12.5122	11.5967	10.376	9.76562	9.76562	9.15527	8.54492	10.0708
8.4	12.5122	11.5967	12.5122	12.5122	11.2915	10.0708	9.15527	9.46045	9.15527	8.8501	9.46045
8.5	12.207	12.207	12.5122	12.207	10.6812	10.0708	8.54492	9.15527	9.15527	8.8501	9.46045
8.6	11.9019	12.5122	12.8174	11.5967	10.376	10.0708	8.23975	9.46045	8.8501	9.15527	9.46045
8.7	11.9019	12.5122	13.1226	10.9863	10.0708	10.6812	8.54492	9.46045	9.15527	9.46045	9.15527
8.8	11.9019	12.8174	13.4277	10.6812	9.76562	10.9863	9.46045	9.76562	9.76562	9.76562	9.15527
8.9	12.207	12.5122	13.1226	10.9863	10.0708	10.9863	10.0708	10.0708	10.0708	10.376	9.15527
9	12.5122	12.5122	12.5122	10.9863	10.0708	10.376	10.6812	10.0708	10.376	10.6812	8.8501
9.1	12.8174	12.5122	11.9019	10.9863	10.376	10.0708	10.6812	10.0708	10.376	10.9863	9.15527
9.2	12.8174	12.5122	10.9863	10.9863	10.6812	10.0708	10.6812	10.0708	10.0708	10.376	9.46045
9.3	12.8174	12.207	10.9863	10.9863	10.376	10.376	10.6812	10.0708	9.76562	9.76562	10.0708
9.4	13.1226	11.9019	11.2915	10.6812	10.376	10.6812	11.2915	10.0708	9.46045	9.76562	10.0708
9.5	13.4277	11.5967	11.9019	10.376	10.6812	10.376	11.5967	9.15527	9.46045	9.76562	9.46045
9.6	13.4277	10.9863	11.9019	10.376	10.6812	9.76563	11.5967	8.54492	9.76562	9.76562	8.8501
9.7	13.4277	10.9863	11.5967	10.0708	10.9863	9.46045	11.2915	7.93457	10.376	9.46045	8.54492
9.8	13.1226	11.5967	11.5967	10.376	11.2915	9.46045	11.2915	7.93457	10.6812	8.8501	8.54492
9.9	12.5122	12.207	11.5967	10.9863	11.5967	10.0708	10.9863	8.54492	10.6812	8.54492	8.23975
10	12.207	12.5122	11.9019	11.5967	11.9019	10.376	10.6812	9.46045	10.0708	8.8501	8.23975
10.1	11.5967	12.207	12.207	11.5967	11.9019	10.376	10.6812	10.0708	9.46045	9.15527	8.54492
10.2	11.2915	11.5967	12.207	10.6812	11.5967	10.376	10.376	10.0708	8.23975	9.46045	8.8501
10.3	11.5967	11.5967	12.207	9.76562	11.2915	10.6812	10.0708	10.0708	7.93457	9.15527	8.8501
10.4	11.5967	11.9019	12.5122	9.46045	10.9863	10.6812	10.0708	10.376	8.23975	8.8501	9.15527
10.5	11.9019	12.5122	12.8174	9.76562	10.6812	10.6812	9.76562	10.0708	9.15527	8.54492	9.46045
10.6	11.9019	13.1226	13.1226	10.376	10.376	10.376	9.46045	9.46045	10.0708	8.54492	9.76562
10.7	12.207	13.1226	12.8174	11.2915	10.0708	10.6812	9.76562	9.15527	10.0708	8.54492	10.0708
10.8	12.8174	13.1226	12.5122	11.9019	10.376	10.9863	10.0708	9.15527	10.376	8.8501	10.0708
10.9	12.8174	13.1226	12.207	11.9019	10.376	10.9863	10.376	9.46045	10.376	8.8501	9.76562
11	12.5122	12.5122	11.5967	11.5967	10.376	10.9863	10.376	9.46045	10.376	8.8501	9.46045
11.1	11.9019	12.207	10.9863	11.2915	10.0708	10.9863	10.0708	9.76562	10.376	8.8501	9.15527
11.2	11.9019	11.9019	10.6812	11.5967	10.0708	10.9863	9.76562	9.76562	10.6812	8.8501	9.46045
11.3	11.5967	11.5967	10.6812	11.9019	10.0708	10.6812	9.46045	9.76562	10.6812	8.8501	9.46045
11.4	11.5967	11.9019	11.2915	12.207	10.0708	10.376	9.76562	9.76562	10.6812	9.46045	9.15527
11.5	11.2915	11.9019	11.5967	12.207	10.0708	10.0708	10.376	9.76562	10.0708	9.76562	8.54492
11.6	10.9863	11.9019	12.207	12.5122	10.0708	10.0708	10.376	9.46045	9.76562	10.0708	8.23975
11.7	10.6812	11.2915	12.5122	12.5122	10.0708	10.0708	10.0708	9.15527	9.15527	10.376	8.54492
11.8	10.6812	10.6812	12.8174	12.207	10.6812	10.0708	9.76562	8.8501	8.54492	10.376	9.15527
11.9	10.9863	10.376	13.1226	11.5967	10.9863	10.0708	9.46045	8.54492	7.93457	10.376	9.76562
12	11.5967	10.376	13.4277	10.6812	11.2915	10.376	9.46045	8.8501	7.93457	10.376	10.0708
12.1	11.9019	10.6812	13.4277	10.6812	11.2915	10.6812	9.15527	9.46045	8.54492	9.76562	10.0708
12.2	12.207	11.2915	13.7329	10.9863	11.2915	10.6812	9.46045	9.76562	9.15527	8.8501	9.76562
12.3	12.5122	11.9019	13.4277	10.6812	10.6812	10.376	9.46045	10.0708	10.0708	8.54492	9.15527
12.4	12.8174	12.5122	13.1226	10.0708	10.376	10.376	9.76562	10.376	10.6812	8.54492	8.54492
12.5	13.4277	12.8174	12.207	9.76562	10.376	10.6812	10.0708	10.376	11.2915	9.46045	8.54492
12.6	14.0381	13.1226	11.9019	9.76562	10.6812	10.6812	10.0708	10.0708	11.5967	10.0708	9.15527
12.7	14.3433	12.5122	11.9019	10.376	11.2915	10.376	10.0708	9.76562	11.5967	10.6812	9.15527
12.8	14.0381	11.5967	11.5967	10.6812	11.5967	10.0708	10.376	9.46045	11.5967	10.6812	8.8501
12.9	13.4277	10.9863	11.2915	10.9863	11.5967	10.0708	10.376	9.46045	11.2915	10.0708	8.8501
13	13.1226	10.9863	11.2915	10.9863	11.2915	10.376	10.0708	9.46045	10.9863	9.76562	8.8501
13.1	13.1226	11.5967	11.5967	10.9863	11.2915	10.6812	10.0708	9.46045	10.6812	9.46045	8.8501
13.2	13.4277	12.207	11.9019	11.2915	11.2915	10.9863	9.76562	9.15527	10.6812	9.46045	9.15527
13.3	13.1226	12.8174	11.9019	11.2915	10.9863	11.2915	9.76562	9.15527	10.376	10.0708	9.46045
13.4	12.8174	13.1226	11.9019	10.9863	10.376	10.9863	10.0708	9.46045	10.0708	10.376	10.0708
13.5	12.8174	12.8174	11.5967	10.9863	10.376	10.376	10.9863	9.76562	9.46045	10.376	9.76562
13.6	12.8174	12.5122	11.5967	10.9863	10.0708	10.0708	11.2915	9.46045	9.15527	10.0708	9.76562
13.7	13.1226	12.207	11.9019	10.9863	10.0708	9.76563	10.9863	9.15527	8.54492	9.46045	9.46045
13.8	12.5122	12.207	11.9019	10.6812	10.376	9.46045	10.376	9.46045	8.23975	9.15527	9.76562
13.9	11.9019	11.9019	11.9019	10.9863	10.376	9.46045	9.76562	9.46045	8.8501	9.15527	10.0708
14	11.5967	11.5967	12.207	11.5967	10.6812	10.0708	9.76562	10.0708	9.46045	9.46045	10.0708
14.1	11.2915	11.2915	12.5122	12.207	10.9863	10.9863	10.0708	10.376	10.0708	9.76562	9.76562
14.2	10.9863	11.2915	13.1226	12.5122	11.5967	10.9863	10.6812	10.6812	10.376	10.0708	9.46045
14.3	11.2915	11.5967	13.1226	11.9019	11.9019	10.6812	11.2915	10.6812	10.0708	10.0708	9.15527
14.4	11.5967	12.207	12.8174	10.9863	12.207	10.6812	11.5967	10.6812	9.46045	10.0708	8.54492
14.5	12.207	12.5122	12.8174	10.376	12.207	10.376	11.2915	10.6812	8.8501	10.376	8.23975
14.6	12.5122	12.5122	12.8174	10.376	12.207	10.9863	10.9863	10.0708	8.54492	10.6812	8.54492
14.7	12.8174	12.5122	12.8174	10.9863	12.207	10.9863	10.6812	9.46045	8.23975	10.6812	9.15527
14.8	12.5122	12.5122	12.5122	11.9019	11.9019	10.9863	10.376	9.46045	8.23975	10.6812	9.46045
14.9	12.5122	12.207	12.5122	12.5122	11.9019	10.9863	10.0708	9.76562	8.54492	10.376	9.76562
15	12.8174	11.9019	12.5122	12.207	11.5967	10.9863	10.376	10.0708	9.15527	10.0708	10.0708
15.1	13.1226	11.9019	12.5122	11.2915	11.5967	11.2915	10.9863	10.376	9.76562	9.76562	10.0708
15.2	13.1226	11.5967	12.207	10.376	11.2915	11.5967	10.9863	10.376	10.0708	9.76562	9.76562
15.3	13.1226	11.5967	12.207	10.0708	11.2915	11.2915	10.9863	9.76562	10.6812	9.46045	9.46045
15.4	13.1226	11.5967	11.9019	10.376	11.5967	11.2915	10.9863	9.15527	11.5967	9.46045	9.15527
15.5	13.4277	11.9019	12.207	10.6812	11.5967	11.2915	10.6812	8.8501	11.9019	9.15527	8.8501
15.6	13.4277	12.207	11.9019	10.9863	11.5967	10.9863	10.376	9.15527	11.5967	8.8501	8.8501
15.7	13.1226	12.5122	11.5967	10.9863	10.9863	10.6812	10.0708	9.76562	10.9863	8.54492	8.8501
15.8	12.8174	12.207	11.2915	10.9863	10.6812	10.376	9.76562	10.0708	10.6812	7.93457	8.8501
15.9	12.8174	11.9019	10.6812	10.6812	10.376	10.0708	9.76562	10.376	10.6812	7.62939	8.8501
16	13.1226	11.5967	10.6812	10.6812	10.376	9.76563	9.76562	10.6812	10.376	7.62939	8.8501
16.1	12.8174	11.5967	10.6812	10.6812	10.376	10.0708	10.376	10.6812	10.376	8.23975	8.8501
16.2	12.207	11.9019	11.2915	10.9863	10.376	10.376	10.6812	10.376	10.0708	9.46045	8.8501
16.3	11.9019	12.207	11.9019	11.5967	10.6812	10.9863	10.9863	10.376	10.0708	10.6812	9.15527
16.4	11.9019	12.207	11.9019	11.5967	10.9863	10.9863	11.2915	10.0708	10.0708	10.9863	9.46045
16.5	11.9019	12.207	11.9019	11.2915	11.2915	10.9863	11.2915	10.0708	9.46045	10.9863	9.46045
16.6	11.9019	11.9019	11.5967	10.9863	11.5967	10.6812	10.9863	10.376	8.54492	10.6812	9.76562
16.7	11.9019	11.5967	11.5967	10.9863	11.5967	10.6812	10.6812	10.0708	8.23975	10.376	9.76562
16.8	11.9019	11.9019	11.5967	11.2915	10.6812	10.6812	10.376	9.76562	8.54492	10.376	10.0708
16.9	12.207	12.207	11.5967	11.9019	10.0708	10.6812	10.6812	9.15527	9.15527	10.376	10.376
17	12.207	12.5122	11.2915	11.9019	9.76562	10.376	10.376	9.15527	9.76562	10.376	10.6812
17.1	11.9019	12.5122	11.5967	11.9019	9.76562	10.0708	10.0708	9.76562	9.76562	10.0708	10.9863
17.2	11.9019	12.8174	11.5967	11.2915	10.0708	10.376	9.76562	10.0708	9.46045	9.76562	10.376
17.3	12.207	12.8174	12.207	10.9863	10.6812	10.9863	9.46045	10.0708	8.8501	9.46045	9.46045
17.4	12.8174	12.207	12.5122	10.9863	10.9863	11.5967	9.76562	10.0708	8.8501	9.15527	8.8501
17.5	13.4277	12.207	12.8174	11.2915	10.9863	11.9019	10.0708	10.0708	8.8501	9.15527	8.23975
17.6	13.7329	12.207	13.1226	11.5967	10.6812	11.5967	10.6812	10.376	9.46045	9.15527	8.23975
17.7	13.1226	12.207	12.8174	11.9019	10.376	10.9863	10.6812	10.376	10.376	9.46045	8.54492
17.8	12.8174	12.207	12.5122	11.9019	10.376	10.376	10.376	10.0708	10.9863	9.46045	9.15527
17.9	12.207	12.207	11.9019	11.5967	10.9863	10.0708	9.76562	9.76562	11.2915	9.76562	9.15527
18	12.207	13.1226	11.2915	11.2915	11.2915	10.376	9.15527	9.76562	10.9863	9.76562	9.15527
18.1	12.5122	14.0381	11.2915	10.6812	11.5967	10.9863	8.8501	10.0708	10.376	9.76562	8.8501
18.2	12.8174	14.9536	11.2915	10.6812	11.5967	11.2915	9.15527	10.376	9.76562	10.0708	8.54492
18.3	12.8174	14.6484	11.5967	11.2915	11.9019	11.2915	9.46045	10.6812	9.46045	10.6812	9.15527
18.4	13.1226	13.7329	11.9019	11.5967	11.9019	10.9863	10.0708	10.6812	9.46045	10.9863	9.46045
18.5	13.1226	12.8174	12.207	11.9019	11.5967	10.6812	10.376	10.0708	9.46045	10.9863	9.46045
18.6	13.1226	11.9019	12.5122	12.207	11.2915	10.376	10.376	9.76562	9.15527	10.6812	9.15527
18.7	12.8174	11.5967	12.8174	12.207	10.9863	10.376	10.6812	9.76562	8.8501	10.0708	8.8501
18.8	12.5122	11.9019	13.1226	11.5967	10.6812	10.6812	10.6812	10.0708	8.54492	9.46045	8.8501
18.9	12.5122	12.8174	13.1226	10.9863	10.376	10.9863	10.9863	10.9863	9.15527	8.8501	9.15527
19	12.8174	13.1226	13.1226	10.6812	10.0708	11.2915	10.9863	11.2915	9.76562	8.8501	9.46045
19.1	13.1226	13.1226	13.1226	10.9863	10.0708	11.5967	10.9863	10.9863	10.376	8.8501	8.8501
19.2	13.1226	12.207	13.1226	11.9019	10.9863	11.9019	11.2915	10.6812	10.6812	8.8501	8.54492
19.3	13.1226	11.5967	12.8174	12.207	11.2915	11.5967	10.9863	10.0708	10.6812	9.15527	8.23975
19.4	13.1226	11.9019	12.5122	12.207	11.5967	10.9863	10.6812	9.46045	10.9863	9.46045	8.23975
19.5	12.5122	12.5122	12.207	12.207	11.2915	10.9863	10.0708	9.46045	10.9863	10.376	8.8501
19.6	11.9019	12.8174	11.9019	11.5967	10.6812	10.9863	9.76562	9.46045	10.376	10.6812	9.15527
19.7	11.2915	13.1226	11.5967	11.2915	10.376	11.2915	9.46045	9.46045	10.0708	10.376	9.46045
19.8	11.2915	13.1226	10.9863	10.9863	10.6812	11.5967	9.46045	9.76562	9.46045	10.376	10.0708
19.9	11.9019	12.8174	11.2915	10.9863	10.9863	11.2915	10.0708	9.76562	9.46045	10.0708	10.0708
20	12.207	12.207	11.9019	11.2915	11.5967	10.9863	10.376	9.46045	9.76562	9.76562	10.0708
20.1	12.8174	11.9019	12.5122	11.2915	11.5967	10.6812	10.6812	9.46045	10.0708	9.76562	9.46045
20.2	13.1226	11.9019	13.1226	11.2915	10.6812	10.0708	10.6812	9.46045	9.76562	9.76562	9.46045
20.3	13.1226	11.9019	13.1226	10.9863	10.0708	9.46045	10.9863	9.15527	9.46045	9.46045	9.46045
20.4	13.1226	11.9019	13.1226	10.6812	10.0708	9.15527	11.2915	9.15527	9.15527	9.46045	9.76562
20.5	12.8174	11.9019	12.8174	10.376	10.376	9.76563	10.9863	9.15527	9.15527	9.46045	9.76562
20.6	12.8174	12.207	12.5122	10.0708	10.9863	10.0708	10.6812	9.46045	9.76562	9.46045	9.46045
20.7	12.5122	12.8174	12.207	10.0708	11.2915	10.0708	10.376	9.76562	10.376	9.76562	9.15527
20.8	12.5122	12.8174	12.207	10.6812	11.2915	9.76563	10.0708	10.0708	10.9863	9.76562	9.15527
20.9	12.5122	12.8174	12.207	11.5967	11.5967	9.46045	10.0708	10.376	11.5967	9.76562	9.15527
21	12.8174	12.5122	12.207	12.207	11.5967	9.15527	10.0708	10.6812	11.5967	10.0708	9.46045
21.1	13.4277	12.5122	11.9019	12.207	11.2915	9.15527	9.76562	10.376	11.5967	10.0708	9.46045
21.2	13.4277	12.207	11.9019	12.207	10.6812	9.46045	9.76562	10.376	11.2915	10.0708	9.46045
21.3	13.1226	11.9019	11.9019	11.5967	10.376	10.0708	9.76562	10.376	10.376	10.0708	9.15527
21.4	12.8174	11.9019	11.5967	11.2915	10.376	10.6812	10.6812	9.76562	9.76562	10.0708	8.8501
21.5	12.5122	11.9019	11.2915	10.6812	10.376	10.9863	11.5967	9.15527	9.46045	9.76562	8.8501
21.6	12.5122	11.9019	11.5967	10.376	10.6812	11.2915	11.2915	8.54492	9.46045	9.76562	9.15527
21.7	12.8174	12.207	11.9019	10.6812	11.5967	11.2915	10.6812	8.8501	9.76562	9.76562	9.15527
21.8	12.8174	12.5122	12.5122	11.2915	11.9019	11.2915	10.0708	9.15527	9.76562	10.0708	9.15527
21.9	12.5122	12.5122	12.8174	12.207	11.2915	11.2915	9.76562	9.46045	9.46045	10.0708	9.46045
22	12.5122	12.5122	14.0381	12.207	10.6812	11.2915	10.0708	9.46045	9.76562	10.0708	9.76562
22.1	12.5122	12.207	14.3433	11.9019	10.6812	11.2915	10.376	9.76562	9.76562	9.76562	10.0708
22.2	12.207	12.5122	13.7329	10.9863	10.9863	11.5967	10.376	10.0708	10.0708	10.0708	10.376
22.3	12.5122	12.5122	12.8174	10.6812	11.2915	11.5967	10.376	10.376	10.376	10.0708	10.376
22.4	13.1226	12.207	12.207	10.376	11.2915	11.2915	10.376	10.6812	10.0708	10.0708	10.6812
22.5	12.8174	12.207	11.9019	10.376	11.2915	10.6812	10.376	10.6812	9.76562	9.76562	10.376
22.6	12.5122	12.207	11.9019	10.376	10.9863	10.0708	10.6812	10.6812	9.46045	9.46045	10.0708
22.7	12.207	12.5122	11.9019	10.9863	10.9863	10.0708	10.9863	10.376	9.46045	9.46045	9.46045
22.8	12.207	12.8174	11.5967	11.2915	10.9863	9.76563	10.9863	10.0708	9.76562	9.15527	9.15527
22.9	12.5122	13.1226	11.2915	11.2915	10.9863	9.46045	10.6812	10.0708	10.0708	9.15527	8.8501
23	12.8174	13.1226	10.9863	10.9863	11.2915	9.46045	10.376	9.46045	10.6812	9.46045	8.54492
23.1	13.1226	13.4277	10.9863	11.2915	11.2915	9.46045	9.76562	8.8501	11.2915	9.46045	8.54492
23.2	12.8174	13.4277	10.9863	11.2915	11.2915	9.76563	9.46045	8.54492	11.2915	9.46045	9.15527
23.3	12.207	13.1226	11.2915	10.9863	10.9863	10.376	8.8501	8.54492	10.9863	9.46045	9.76562
23.4	12.207	12.5122	11.2915	10.6812	10.9863	10.6812	8.54492	9.15527	10.376	9.46045	9.76562
23.5	12.5122	12.207	11.2915	10.6812	10.9863	10.6812	8.54492	9.46045	9.76562	9.46045	9.46045
23.6	12.5122	11.9019	11.2915	11.2915	10.9863	10.6812	9.15527	10.0708	9.15527	9.46045	8.54492
23.7	12.207	11.5967	11.5967	11.5967	10.9863	10.6812	10.0708	10.376	9.15527	9.46045	7.93457
23.8	12.207	11.5967	11.9019	11.9019	10.376	11.2915	10.9863	10.376	9.46045	9.76562	7.32422
23.9	12.207	11.2915	12.207	11.9019	10.0708	10.9863	11.2915	10.376	9.76562	9.46045	7.32422
24	12.5122	11.2915	11.9019	11.5967	9.76562	10.9863	11.2915	10.376	10.0708	9.15527	7.32422
24.1	12.5122	11.9019	11.5967	11.5967	10.0708	10.376	11.2915	10.0708	10.0708	8.54492	7.62939
24.2	12.207	12.207	11.2915	11.2915	10.0708	9.76563	10.9863	9.46045	9.76562	8.54492	7.93457
24.3	11.5967	12.5122	11.2915	11.2915	10.0708	9.76563	10.6812	9.46045	9.46045	8.54492	8.23975
24.4	10.9863	12.5122	11.5967	11.2915	10.0708	10.0708	10.6812	9.76562	8.8501	8.54492	8.8501
24.5	10.9863	12.5122	11.9019	11.5967	10.0708	10.376	10.6812	9.76562	8.54492	8.8501	9.76562
24.6	11.2915	12.8174	11.5967	11.9019	10.0708	10.9863	10.9863	9.76562	8.8501	9.15527	10.376
24.7	11.5967	13.1226	11.5967	11.9019	10.376	10.9863	10.6812	9.76562	8.8501	9.15527	10.376
24.8	12.207	13.1226	11.5967	12.207	10.6812	11.2915	10.0708	9.76562	9.15527	9.15527	10.0708
24.9	12.5122	12.8174	11.9019	12.207	10.376	11.2915	9.76562	9.76562	9.46045	9.76562	9.76562
25	13.1226	12.5122	11.9019	11.5967	10.376	10.6812	9.46045	10.0708	9.76562	10.376	9.46045
25.1	13.1226	12.207	12.207	10.9863	10.0708	10.0708	9.46045	9.76562	9.76562	10.6812	9.76562
25.2	12.5122	11.9019	12.207	10.6812	10.376	9.76563	9.76562	9.46045	9.46045	10.6812	9.76562
25.3	12.207	11.5967	12.207	10.9863	10.6812	9.76563	10.0708	9.15527	9.15527	10.376	9.76562
25.4	11.9019	11.2915	12.5122	11.2915	10.9863	10.376	10.376	9.15527	8.8501	10.0708	9.15527
25.5	11.9019	11.2915	12.8174	11.2915	11.2915	10.376	10.376	9.46045	8.8501	9.76562	8.8501
25.6	11.5967	11.5967	13.1226	10.9863	11.2915	10.0708	10.376	9.76562	8.8501	9.76562	8.54492
25.7	11.5967	11.9019	12.8174	10.6812	11.2915	9.46045	10.9863	10.0708	8.8501	9.76562	8.54492
25.8	11.5967	12.5122	12.207	10.9863	10.9863	9.76563	10.9863	10.0708	9.15527	9.76562	9.15527
25.9	11.9019	12.5122	11.9019	11.5967	10.376	10.0708	10.6812	10.376	9.46045	9.76562	9.46045
26	12.5122	12.5122	11.5967	11.5967	10.376	10.6812	9.76562	10.6812	9.76562	10.0708	9.76562
26.1	13.1226	12.207	11.2915	11.5967	10.0708	10.6812	9.46045	10.6812	10.0708	10.376	9.76562
26.2	13.1226	12.207	11.2915	11.2915	10.0708	10.6812	9.15527	10.0708	10.376	10.376	9.46045
26.3	13.1226	12.207	11.2915	10.376	10.376	10.6812	9.15527	9.76562	10.376	10.376	9.46045
26.4	12.8174	12.207	11.2915	9.46045	10.9863	10.6812	9.15527	9.46045	10.376	10.376	9.46045
26.5	12.8174	12.5122	11.5967	9.15527	11.2915	10.376	9.15527	9.76562	10.6812	10.0708	9.76562
26.6	12.8174	12.8174	11.5967	9.15527	10.9863	10.376	10.0708	9.76562	10.6812	9.46045	9.76562
26.7	12.5122	12.8174	11.5967	9.76562	10.376	10.0708	10.9863	9.15527	10.6812	8.8501	9.76562
26.8	12.207	12.8174	11.2915	9.76562	10.0708	9.76563	11.5967	9.15527	10.376	8.54492	9.76562
26.9	12.207	12.8174	11.5967	10.0708	10.0708	10.0708	11.5967	9.15527	9.76562	8.54492	9.46045
27	12.5122	12.8174	11.5967	10.376	10.6812	10.6812	10.6812	9.76562	9.46045	8.54492	9.46045
27.1	12.8174	12.8174	11.5967	10.6812	11.5967	11.5967	10.0708	10.0708	9.15527	8.23975	9.15527
27.2	12.5122	12.8174	11.9019	11.2915	11.9019	12.207	9.76562	10.0708	9.15527	8.23975	8.54492
27.3	12.207	13.1226	11.9019	11.5967	11.2915	11.9019	10.0708	9.76562	9.46045	8.8501	8.8501
27.4	12.207	13.1226	12.207	11.5967	10.9863	11.2915	10.376	9.15527	9.46045	9.46045	9.15527
27.5	12.5122	12.5122	11.9019	11.2915	10.6812	10.376	10.6812	8.8501	9.76562	9.76562	9.46045
27.6	12.8174	11.5967	11.5967	11.2915	10.376	9.46045	10.376	8.8501	9.76562	9.76562	9.76562
27.7	12.5122	11.2915	11.2915	11.5967	10.376	9.15527	10.376	8.8501	10.0708	9.46045	10.0708
27.8	12.207	11.2915	11.2915	11.9019	10.6812	8.54492	10.0708	9.15527	10.0708	9.46045	10.0708
27.9	11.9019	11.9019	11.2915	11.5967	10.6812	9.15527	10.0708	9.15527	9.76562	9.76562	10.0708
28	11.5967	12.5122	11.2915	10.9863	10.9863	9.76563	9.76562	9.15527	9.46045	10.0708	9.46045
28.1	11.9019	12.5122	11.2915	10.376	10.9863	10.6812	9.46045	9.46045	9.15527	10.376	8.8501
28.2	12.207	12.207	10.9863	10.376	10.6812	11.2915	9.15527	9.76562	9.46045	10.376	8.8501
28.3	12.207	11.5967	10.9863	10.376	10.6812	11.2915	9.15527	10.0708	9.15527	10.6812	9.46045
28.4	11.9019	11.5967	10.9863	10.9863	10.9863	10.9863	9.46045	10.376	9.15527	10.376	9.46045
28.5	11.9019	11.9019	11.2915	11.2915	11.5967	10.9863	9.46045	10.0708	9.15527	10.376	8.8501
28.6	11.5967	12.5122	12.207	10.9863	11.9019	10.9863	9.76562	9.76562	9.46045	9.76562	8.54492
28.7	10.9863	12.8174	12.5122	10.6812	11.5967	11.2915	9.76562	10.0708	9.46045	9.46045	8.23975
28.8	10.376	13.1226	12.5122	10.376	11.5967	10.9863	9.76562	10.0708	9.15527	9.46045	8.54492
28.9	10.376	13.1226	12.5122	10.6812	11.2915	10.6812	10.0708	10.0708	9.15527	9.76562	8.54492
29	10.376	12.5122	11.9019	10.9863	10.9863	10.6812	10.0708	10.0708	9.46045	10.0708	9.15527
29.1	10.6812	11.9019	11.9019	10.9863	10.6812	10.376	10.376	9.76562	9.76562	9.76562	9.46045
29.2	10.9863	11.5967	11.5967	11.5967	10.6812	10.0708	10.376	9.46045	10.376	9.76562	9.46045
29.3	11.2915	11.5967	11.5967	12.207	10.6812	10.0708	10.376	9.46045	10.6812	9.46045	9.46045
29.4	11.9019	11.5967	11.5967	12.8174	10.6812	9.76563	10.0708	9.15527	10.376	9.46045	8.8501
29.5	12.207	11.5967	11.2915	13.1226	10.376	10.0708	10.0708	9.15527	9.76562	9.15527	8.54492
29.6	12.5122	11.9019	11.5967	12.5122	10.376	10.376	9.76562	8.8501	9.15527	9.15527	8.8501
29.7	12.8174	12.207	11.5967	11.9019	10.6812	10.376	9.76562	8.54492	8.8501	9.46045	9.15527
29.8	12.8174	12.207	11.9019	11.5967	10.9863	10.6812	9.76562	8.23975	9.15527	9.76562	9.76562
29.9	12.8174	12.207	12.207	11.5967	11.2915	10.9863	9.15527	8.8501	10.0708	10.0708	10.376
30	12.5122	12.5122	12.5122	11.9019	11.2915	10.6812	9.15527	9.46045	10.9863	10.0708	10.376
30.1	12.5122	12.8174	12.5122	11.9019	10.9863	10.0708	9.76562	10.0708	11.5967	10.0708	10.0708
30.2	12.5122	13.1226	12.207	12.207	10.0708	9.46045	10.376	10.376	11.5967	10.376	9.46045
30.3	12.5122	12.8174	11.9019	11.5967	9.15527	9.46045	10.6812	9.76562	11.2915	10.376	8.8501
30.4	12.5122	12.207	11.2915	10.6812	9.15527	10.0708	10.6812	9.15527	10.6812	10.376	8.8501
30.5	12.207	11.9019	10.376	10.0708	9.46045	10.376	10.376	9.15527	9.46045	10.0708	8.8501
30.6	12.207	11.5967	10.0708	9.76562	9.76562	10.6812	10.376	9.76562	8.54492	9.76562	9.46045
30.7	11.9019	11.2915	10.376	10.0708	10.376	10.9863	10.376	10.376	8.23975	8.8501	10.0708
30.8	11.2915	11.2915	11.2915	10.6812	10.9863	11.2915	10.6812	10.9863	8.54492	8.54492	10.376
30.9	10.6812	11.5967	11.9019	10.9863	11.2915	11.2915	10.6812	11.2915	8.8501	8.54492	10.0708
31	11.5967	11.9019	12.207	10.9863	11.2915	10.9863	10.376	11.2915	9.15527	8.8501	9.15527
31.1	12.5122	12.207	12.207	10.6812	11.2915	10.376	10.0708	10.9863	9.46045	9.15527	8.54492
31.2	13.4277	12.5122	12.5122	10.6812	10.9863	9.76563	9.76562	10.6812	9.46045	9.15527	8.23975
31.3	13.7329	12.5122	12.5122	10.6812	10.9863	9.76563	9.76562	9.76562	9.46045	9.15527	8.23975
31.4	13.4277	12.5122	13.1226	10.6812	10.6812	9.76563	10.0708	9.15527	9.46045	9.15527	8.8501
31.5	13.1226	12.8174	13.4277	11.2915	10.6812	9.76563	10.0708	8.8501	9.76562	9.76562	9.15527
31.6	12.8174	12.8174	13.4277	11.9019	10.9863	9.46045	10.0708	8.8501	10.0708	10.376	9.76562
31.7	12.8174	12.8174	13.1226	12.5122	11.2915	9.76563	10.6812	8.8501	9.76562	10.6812	10.0708
31.8	12.8174	13.1226	12.8174	12.5122	11.2915	10.376	10.9863	9.15527	9.76562	10.6812	10.376
31.9	12.8174	13.1226	12.207	11.9019	10.9863	11.2915	10.9863	9.15527	9.76562	10.376	10.0708
32	12.8174	12.8174	11.5967	11.5967	10.6812	11.9019	10.6812	8.8501	10.0708	10.0708	9.76562
32.1	12.5122	12.5122	11.9019	11.5967	10.6812	12.5122	10.376	8.8501	10.0708	9.15527	9.15527
32.2	12.207	12.207	12.207	11.2915	10.9863	12.207	10.0708	9.15527	10.0708	8.54492	8.54492
32.3	12.5122	11.9019	12.5122	10.9863	11.5967	11.2915	10.0708	9.46045	9.76562	8.23975	7.93457
32.4	12.5122	11.9019	12.207	10.6812	11.9019	10.376	9.76562	10.0708	9.76562	8.23975	7.93457
32.5	12.5122	11.9019	11.9019	10.6812	11.9019	10.0708	9.76562	10.0708	10.0708	8.23975	8.54492
32.6	12.5122	12.207	11.2915	10.9863	11.5967	10.376	9.76562	9.76562	10.0708	8.54492	8.8501
32.7	12.5122	12.207	11.2915	11.9019	10.9863	10.6812	10.376	9.46045	10.0708	9.15527	9.15527
32.8	12.207	12.207	10.9863	12.207	10.9863	10.9863	10.9863	9.15527	10.0708	9.76562	9.76562
32.9	11.9019	12.207	11.2915	12.207	10.9863	11.2915	10.9863	9.46045	9.76562	10.376	10.0708
33	12.207	11.9019	11.5967	11.5967	11.2915	11.2915	10.6812	9.76562	9.76562	10.376	10.376
33.1	12.207	11.5967	11.9019	11.2915	11.2915	11.2915	10.376	9.76562	9.76562	10.376	10.376
33.2	12.207	11.5967	11.9019	10.6812	11.2915	11.2915	10.376	9.76562	10.0708	10.0708	10.376
33.3	12.207	11.9019	11.5967	10.376	11.2915	11.5967	10.376	9.76562	10.376	9.46045	10.376
33.4	12.207	12.207	11.9019	10.6812	10.9863	11.2915	9.76562	10.0708	10.0708	9.15527	10.376
33.5	12.207	12.5122	12.207	10.9863	10.9863	10.9863	9.46045	10.376	9.76562	9.46045	10.6812
33.6	12.8174	12.8174	12.5122	10.9863	10.9863	10.9863	9.15527	10.376	9.15527	10.0708	10.6812
33.7	13.1226	12.5122	11.9019	10.9863	10.9863	10.9863	9.46045	10.9863	8.8501	10.0708	10.376
33.8	13.1226	12.207	11.5967	10.6812	10.9863	10.9863	9.76562	11.2915	8.8501	9.46045	9.76562
33.9	12.8174	11.9019	11.2915	10.6812	10.9863	11.2915	9.76562	11.5967	9.15527	9.15527	8.8501
34	12.5122	11.9019	11.5967	10.6812	10.6812	11.2915	9.76562	10.9863	9.46045	9.15527	7.93457
34.1	11.9019	12.207	11.9019	10.9863	10.9863	10.9863	9.46045	10.6812	9.46045	9.76562	7.62939
34.2	11.5967	12.207	12.207	11.2915	11.2915	10.376	9.76562	10.376	9.46045	10.0708	7.62939
34.3	11.2915	12.5122	12.207	11.5967	11.5967	9.76563	10.0708	10.0708	9.76562	10.0708	7.93457
34.4	11.5967	12.5122	12.207	11.5967	11.5967	9.46045	10.376	9.76562	10.0708	9.76562	8.23975
34.5	11.5967	12.5122	11.9019	11.5967	11.2915	9.76563	10.0708	9.46045	10.0708	9.46045	8.54492
34.6	11.5967	11.9019	11.5967	11.5967	10.9863	9.46045	10.0708	9.15527	10.0708	9.46045	8.54492
34.7	11.5967	11.5967	11.5967	11.5967	10.6812	9.76563	10.376	8.8501	9.76562	9.76562	8.8501
34.8	11.9019	11.2915	11.5967	11.2915	10.376	10.6812	10.6812	8.8501	9.76562	10.0708	9.15527
34.9	12.5122	11.9019	11.5967	11.2915	10.0708	11.2915	10.9863	9.46045	9.76562	10.0708	9.46045
35	12.8174	12.207	11.5967	11.2915	9.76562	11.9019	11.2915	10.0708	9.76562	9.76562	9.46045
35.1	13.1226	12.5122	11.9019	11.2915	9.76562	11.5967	11.2915	10.6812	10.0708	9.76562	9.15527
35.2	13.1226	12.8174	12.207	11.2915	10.0708	11.2915	10.9863	10.9863	10.376	10.0708	9.46045
35.3	13.1226	12.8174	12.8174	11.2915	10.6812	11.2915	10.6812	10.6812	10.6812	10.376	9.76562
35.4	12.8174	12.8174	12.8174	11.5967	10.9863	11.2915	10.376	10.376	10.6812	10.376	10.376
35.5	12.8174	12.5122	12.8174	11.5967	11.2915	11.5967	10.376	10.0708	10.376	10.376	10.376
35.6	12.5122	12.207	12.5122	11.5967	11.2915	11.2915	10.9863	10.0708	10.0708	10.376	10.0708
35.7	12.5122	11.5967	12.8174	11.5967	10.9863	10.9863	10.9863	9.76562	9.76562	10.376	9.76562
35.8	12.207	11.5967	13.1226	11.2915	10.9863	10.6812	10.6812	9.46045	9.76562	10.376	9.15527
35.9	12.207	12.207	13.4277	11.2915	11.2915	10.0708	10.0708	9.46045	9.76562	10.0708	8.54492
36	11.9019	12.8174	13.4277	10.9863	11.2915	9.76563	9.76562	9.46045	9.46045	9.76562	8.23975
36.1	11.9019	13.4277	13.7329	10.9863	11.5967	9.46045	9.76562	9.76562	9.15527	9.15527	8.54492
36.2	12.207	13.7329	13.7329	11.2915	11.5967	9.46045	9.76562	9.76562	8.8501	9.15527	9.15527
36.3	12.207	13.4277	13.4277	11.9019	11.5967	9.46045	10.0708	10.0708	9.15527	9.46045	10.0708
36.4	12.5122	12.8174	12.8174	12.207	11.2915	9.76563	10.0708	10.0708	9.46045	9.46045	10.6812
36.5	12.5122	12.207	11.9019	12.207	10.6812	10.0708	9.76562	10.376	9.76562	9.76562	10.6812
36.6	12.8174	11.5967	11.5967	12.207	9.76562	10.6812	9.76562	10.376	10.0708	10.0708	10.0708
36.7	13.1226	11.5967	11.2915	11.9019	9.15527	10.9863	9.46045	10.376	10.376	10.0708	9.15527
36.8	12.8174	11.9019	11.2915	11.9019	9.46045	10.6812	9.15527	10.376	10.376	9.76562	8.8501
36.9	12.5122	12.5122	11.5967	11.5967	10.0708	10.0708	9.46045	10.376	10.0708	9.15527	8.54492
37	11.9019	12.8174	11.9019	10.9863	10.6812	9.76563	9.76562	10.0708	10.0708	9.15527	8.54492
37.1	11.9019	12.8174	12.207	10.6812	11.2915	10.0708	10.376	10.0708	10.376	8.8501	8.54492
37.2	12.5122	12.5122	12.5122	10.376	11.5967	10.376	10.6812	9.76562	10.9863	8.8501	8.8501
37.3	12.8174	11.9019	12.8174	10.376	11.5967	10.6812	10.9863	9.76562	10.6812	9.15527	9.15527
37.4	13.1226	11.5967	12.8174	10.376	11.2915	10.6812	11.5967	9.46045	10.6812	9.76562	9.46045
37.5	13.1226	11.9019	12.5122	10.6812	10.9863	10.9863	11.5967	9.46045	10.376	9.76562	10.0708
37.6	13.1226	12.5122	12.5122	10.6812	10.6812	11.2915	11.5967	9.76562	10.0708	10.0708	9.76562
37.7	13.1226	13.1226	12.8174	10.6812	10.9863	11.5967	10.9863	9.76562	9.76562	10.376	9.15527
37.8	12.8174	13.4277	12.5122	10.6812	10.9863	11.2915	10.376	9.76562	10.0708	10.376	8.54492
37.9	12.5122	12.8174	12.207	10.9863	11.2915	10.9863	10.0708	10.0708	10.0708	10.0708	8.54492
38	11.9019	12.207	11.9019	11.5967	11.2915	10.6812	9.76562	10.0708	9.76562	9.46045	9.15527
38.1	11.5967	11.5967	11.5967	11.5967	10.9863	10.9863	10.0708	9.76562	9.46045	9.15527	9.76562
38.2	11.5967	11.5967	11.5967	11.5967	10.6812	11.5967	9.76562	9.15527	9.15527	9.15527	10.0708
38.3	11.5967	11.5967	11.5967	11.5967	10.376	11.9019	9.15527	8.8501	9.15527	8.8501	9.46045
38.4	11.9019	11.2915	11.5967	11.5967	10.9863	11.5967	9.15527	8.8501	9.46045	8.8501	8.8501
38.5	11.9019	10.9863	11.9019	12.207	11.2915	10.9863	9.46045	8.8501	9.76562	9.15527	8.23975
38.6	11.9019	10.9863	12.5122	12.8174	11.5967	10.9863	10.0708	9.15527	10.0708	10.0708	8.23975
38.7	12.207	11.2915	13.1226	12.8174	11.5967	10.9863	10.6812	9.15527	10.376	10.6812	8.54492
38.8	12.5122	12.207	13.1226	12.8174	11.2915	10.6812	11.2915	9.46045	10.6812	10.376	8.8501
38.9	12.8174	12.8174	12.5122	12.5122	11.2915	10.376	10.9863	10.0708	10.6812	10.0708	9.15527
39	13.1226	12.8174	11.9019	11.9019	11.5967	9.76563	10.9863	10.376	10.376	9.46045	9.15527
39.1	12.5122	12.8174	11.5967	10.9863	11.9019	9.46045	10.6812	10.0708	9.76562	9.46045	8.8501
39.2	12.5122	12.8174	11.2915	10.376	11.9019	9.76563	10.6812	9.46045	9.15527	9.46045	9.15527
39.3	12.5122	12.5122	11.2915	10.0708	11.5967	10.0708	10.376	9.15527	9.15527	10.0708	9.46045
39.4	12.5122	12.207	11.2915	10.0708	11.2915	10.376	10.376	9.46045	9.15527	10.376	9.76562
39.5	12.5122	11.5967	11.9019	10.376	10.9863	10.6812	10.0708	10.0708	9.15527	10.376	10.0708
39.6	12.5122	11.2915	12.207	10.376	10.376	10.6812	10.0708	10.0708	9.15527	10.0708	9.76562
39.7	12.5122	10.9863	12.207	10.0708	10.376	10.9863	10.376	10.0708	9.46045	9.76562	9.76562
39.8	12.8174	10.9863	12.207	9.76562	10.376	10.9863	10.6812	9.76562	9.76562	9.15527	9.76562
39.9	13.1226	11.2915	11.5967	10.376	10.0708	10.6812	11.2915	9.46045	10.0708	8.8501	10.0708
40	13.1226	11.5967	11.2915	10.6812	10.0708	10.6812	11.2915	9.15527	10.376	8.54492	10.376
40.1	12.8174	12.5122	11.2915	10.9863	10.0708	10.376	10.6812	9.46045	10.376	8.8501	9.76562
40.2	12.8174	13.1226	10.9863	10.9863	10.0708	10.376	10.0708	9.76562	10.376	9.15527	9.15527
40.3	13.4277	13.1226	11.2915	10.376	10.0708	9.76563	9.46045	10.0708	10.0708	9.15527	8.23975
40.4	13.7329	12.8174	11.2915	10.0708	10.0708	9.76563	9.76562	9.46045	9.76562	9.15527	7.62939
40.5	13.4277	13.1226	11.5967	9.76562	10.0708	9.76563	10.0708	8.54492	10.0708	9.46045	7.93457
40.6	13.1226	13.1226	11.2915	10.0708	10.6812	10.0708	10.376	8.23975	10.0708	10.0708	8.23975
40.7	12.5122	12.8174	10.9863	10.6812	10.6812	10.6812	10.376	8.54492	10.0708	10.0708	8.8501
40.8	12.207	12.5122	10.9863	11.2915	10.9863	10.9863	10.376	9.15527	9.76562	10.376	9.46045
40.9	11.9019	11.9019	11.2915	11.2915	10.6812	10.9863	10.6812	9.76562	9.46045	10.0708	10.0708
41	12.207	11.9019	11.9019	11.2915	10.6812	10.6812	10.9863	10.0708	9.46045	10.0708	10.376
41.1	12.5122	11.9019	12.5122	10.6812	10.9863	10.376	10.9863	10.376	9.46045	10.0708	10.0708
41.2	12.5122	11.9019	12.5122	10.376	10.9863	10.376	10.6812	10.6812	9.46045	10.0708	9.46045
41.3	12.207	11.2915	12.5122	10.0708	11.2915	10.6812	10.376	10.376	9.76562	9.46045	8.8501
41.4	11.9019	10.6812	12.207	10.0708	11.5967	10.9863	10.376	10.376	10.0708	8.8501	8.23975
41.5	12.207	10.6812	12.207	10.6812	11.5967	10.9863	10.376	10.6812	10.376	8.8501	7.93457
41.6	12.8174	10.6812	11.9019	11.5967	11.2915	10.6812	10.376	10.376	10.376	9.15527	7.93457
41.7	13.1226	10.9863	12.207	12.207	11.2915	10.376	10.376	10.376	10.0708	9.76562	7.93457
41.8	12.8174	11.2915	12.207	12.5122	11.2915	10.376	10.376	10.376	9.76562	10.376	8.23975
41.9	12.5122	12.207	12.8174	12.5122	10.9863	10.0708	10.376	10.376	9.46045	10.6812	8.8501
42	12.5122	12.5122	13.1226	12.8174	10.9863	9.46045	11.2915	10.0708	9.46045	10.6812	9.15527
42.1	12.5122	13.1226	13.7329	13.1226	10.9863	8.8501	11.2915	9.46045	9.76562	10.6812	9.46045
42.2	12.207	13.4277	13.7329	13.1226	10.9863	8.54492	10.9863	8.8501	9.46045	10.376	9.76562
42.3	11.5967	13.4277	12.8174	12.5122	10.6812	8.8501	10.376	8.54492	9.46045	10.376	10.0708
42.4	11.2915	13.7329	12.207	11.5967	10.6812	10.0708	9.76562	8.54492	9.46045	10.0708	10.376
42.5	10.6812	13.4277	11.2915	10.6812	10.6812	11.2915	9.76562	8.23975	9.76562	10.0708	10.0708
42.6	10.376	13.1226	11.2915	10.376	10.9863	12.207	9.76562	8.23975	10.0708	9.76562	9.76562
42.7	10.376	12.8174	11.2915	10.376	10.9863	11.9019	9.76562	8.54492	10.0708	9.46045	9.46045
42.8	10.6812	12.207	11.2915	10.9863	10.9863	11.2915	10.0708	9.15527	9.76562	8.8501	9.15527
42.9	10.9863	11.9019	10.9863	11.5967	11.2915	10.6812	10.0708	9.46045	9.76562	8.54492	8.54492
43	10.9863	11.5967	10.9863	11.5967	11.2915	10.376	9.76562	10.0708	10.0708	8.23975	7.93457
43.1	11.5967	11.9019	11.5967	11.2915	10.9863	10.0708	9.76562	10.376	10.376	7.93457	7.62939
43.2	11.9019	11.5967	12.207	10.6812	10.9863	9.46045	9.76562	10.376	10.376	8.23975	7.62939
43.3	12.5122	11.2915	12.207	10.376	10.9863	9.15527	9.76562	10.376	10.0708	8.23975	8.23975
43.4	12.8174	10.6812	12.207	10.6812	11.2915	9.15527	10.0708	10.376	9.76562	8.54492	8.8501
43.5	12.8174	10.376	11.9019	10.6812	11.5967	9.76563	10.0708	10.0708	9.46045	9.15527	9.46045
43.6	12.5122	10.376	11.5967	10.6812	11.5967	10.376	9.76562	9.76562	9.15527	9.46045	10.0708
43.7	12.5122	10.376	11.2915	10.6812	11.2915	10.9863	9.46045	9.15527	8.8501	9.76562	10.376
43.8	12.207	10.376	11.5967	10.9863	11.2915	11.2915	9.15527	8.54492	9.15527	10.0708	10.0708
43.9	12.207	10.9863	11.9019	10.9863	11.2915	11.2915	9.46045	8.23975	9.46045	9.76562	9.46045
44	11.9019	11.5967	12.5122	10.9863	11.2915	10.376	10.376	8.54492	10.0708	9.46045	9.15527
44.1	11.9019	12.207	12.5122	10.9863	11.2915	9.46045	10.9863	8.54492	9.76562	9.46045	9.15527
44.2	12.207	12.8174	12.207	10.9863	11.2915	9.15527	10.6812	8.54492	9.15527	9.76562	8.8501
44.3	12.5122	13.1226	12.207	11.5967	10.9863	9.15527	10.0708	8.8501	8.54492	10.0708	8.23975
44.4	12.5122	12.8174	12.207	11.9019	10.6812	9.76563	9.46045	9.46045	8.54492	10.0708	7.93457
44.5	12.5122	12.5122	11.9019	12.207	10.6812	10.376	8.8501	10.0708	8.54492	10.0708	7.93457
44.6	12.5122	12.207	11.2915	12.5122	11.2915	10.6812	9.15527	10.376	8.8501	9.76562	8.23975
44.7	12.8174	11.9019	11.2915	12.207	11.9019	10.6812	9.76562	10.376	9.15527	9.76562	8.8501
44.8	12.5122	12.207	11.5967	12.207	11.9019	10.9863	10.376	10.0708	9.15527	9.46045	9.15527
44.9	11.9019	12.8174	12.207	11.9019	11.2915	11.2915	10.6812	9.46045	8.8501	8.8501	9.76562
45	11.5967	13.4277	12.5122	11.5967	10.6812	11.5967	10.6812	9.46045	8.8501	8.54492	10.0708
45.1	11.5967	13.7329	12.207	11.2915	9.76562	11.5967	10.6812	9.46045	8.8501	8.54492	10.0708
45.2	11.9019	13.4277	11.5967	10.6812	9.15527	11.2915	10.6812	9.46045	9.46045	9.15527	9.76562
45.3	12.207	13.1226	11.2915	10.376	8.23975	10.6812	10.0708	9.76562	9.76562	9.76562	9.46045
45.4	12.207	12.8174	11.2915	10.0708	8.23975	10.376	9.46045	10.0708	9.76562	10.376	9.46045
45.5	12.207	12.5122	11.2915	10.0708	8.8501	10.376	9.46045	10.376	9.46045	10.6812	9.46045
45.6	11.9019	12.207	11.5967	10.376	9.76562	10.6812	9.76562	10.6812	9.76562	10.376	9.76562
45.7	11.5967	12.207	11.9019	10.0708	10.9863	10.6812	10.0708	10.6812	10.376	9.76562	10.0708
45.8	11.5967	12.207	12.207	10.0708	11.9019	10.9863	10.0708	10.6812	10.6812	9.46045	9.76562
45.9	11.5967	12.207	11.5967	10.6812	12.207	10.9863	10.376	10.6812	10.6812	9.15527	9.46045
46	11.9019	11.5967	10.9863	11.9019	11.9019	11.5967	10.6812	10.6812	10.376	9.15527	8.8501
46.1	12.207	11.2915	10.9863	12.207	10.9863	11.5967	10.9863	10.6812	9.46045	9.46045	8.54492
46.2	12.207	10.9863	11.2915	12.207	10.6812	11.5967	10.6812	10.376	9.15527	9.15527	8.8501
46.3	11.9019	11.2915	11.5967	11.5967	10.376	10.9863	10.376	10.0708	8.54492	9.76562	9.46045
46.4	11.9019	11.9019	12.207	11.2915	10.376	10.0708	10.6812	9.76562	8.54492	10.6812	9.76562
46.5	11.5967	12.5122	12.5122	10.6812	10.6812	9.76563	10.9863	9.15527	9.15527	10.9863	9.76562
46.6	11.2915	12.8174	12.5122	10.376	11.2915	9.76563	10.6812	8.8501	9.46045	10.9863	9.46045
46.7	11.2915	12.8174	12.207	10.0708	11.9019	9.15527	10.376	8.54492	9.76562	10.376	9.46045
46.8	11.9019	12.8174	11.9019	9.76562	11.5967	8.54492	10.376	8.8501	10.0708	9.76562	10.0708
46.9	12.8174	12.5122	11.9019	9.76562	10.6812	8.54492	10.376	9.15527	10.0708	9.15527	10.376
47	13.4277	11.9019	11.9019	9.76562	10.376	9.76563	10.376	9.76562	10.6812	8.8501	10.376
47.1	13.4277	11.2915	11.5967	9.46045	10.376	10.6812	10.0708	10.0708	11.2915	8.8501	9.76562
47.2	13.1226	11.2915	10.9863	10.0708	10.6812	11.2915	9.76562	10.0708	11.9019	9.15527	9.15527
47.3	12.5122	11.2915	11.5967	10.6812	10.6812	11.5967	9.46045	9.76562	12.207	9.46045	8.54492
47.4	11.9019	11.2915	12.207	10.9863	10.376	11.9019	9.76562	9.15527	11.2915	9.76562	8.23975
47.5	10.6812	11.5967	12.5122	11.2915	10.0708	12.207	10.0708	8.8501	10.376	10.0708	8.23975
47.6	9.76562	12.207	12.8174	11.2915	9.76562	11.9019	10.0708	9.15527	9.46045	9.76562	8.23975
47.7	10.0708	12.5122	12.5122	11.5967	10.0708	11.5967	10.376	9.46045	8.54492	9.15527	7.93457
47.8	10.6812	13.1226	11.9019	11.9019	10.6812	11.2915	10.6812	9.76562	7.93457	8.8501	7.93457
47.9	11.2915	13.4277	11.5967	12.207	10.9863	10.9863	11.2915	9.76562	7.93457	9.15527	7.93457
48	11.5967	13.7329	11.9019	12.8174	11.2915	10.6812	11.5967	9.46045	8.23975	9.15527	8.54492
48.1	11.9019	13.7329	12.207	13.1226	10.9863	10.6812	11.9019	9.46045	8.54492	8.8501	8.8501
48.2	11.9019	13.1226	12.207	12.8174	10.9863	10.376	11.5967	9.76562	9.15527	8.8501	8.8501
48.3	12.5122	12.5122	12.5122	12.207	10.9863	10.376	10.9863	10.0708	9.15527	9.15527	9.15527
48.4	12.8174	11.5967	12.207	10.9863	10.9863	10.6812	10.9863	10.376	9.46045	9.46045	9.15527
48.5	13.1226	10.6812	11.9019	9.76562	10.6812	10.6812	10.9863	10.376	9.76562	9.76562	9.15527
48.6	13.4277	10.6812	11.5967	9.46045	10.6812	10.6812	10.9863	10.6812	9.76562	10.0708	9.46045
48.7	13.1226	10.6812	11.5967	9.76562	10.6812	10.376	10.6812	10.9863	10.376	10.0708	9.76562
48.8	12.5122	11.2915	11.5967	10.6812	10.6812	10.0708	10.6812	10.6812	10.6812	9.46045	10.376
48.9	11.5967	11.2915	12.207	11.5967	10.9863	10.0708	10.6812	10.0708	10.6812	8.8501	10.6812
49	11.2915	11.2915	12.8174	12.207	11.2915	10.376	10.6812	9.15527	10.6812	8.8501	10.6812
49.1	11.2915	11.2915	13.1226	12.5122	11.2915	10.9863	10.376	8.8501	10.376	9.46045	10.6812
49.2	11.9019	11.2915	12.8174	12.207	10.6812	11.2915	9.76562	9.15527	10.376	9.76562	10.376
49.3	11.9019	11.5967	11.9019	11.5967	10.0708	11.2915	9.46045	9.76562	10.0708	9.76562	10.6812
49.4	11.9019	12.207	11.2915	11.2915	9.46045	10.9863	9.46045	10.0708	9.76562	9.46045	10.6812
49.5	11.9019	12.5122	10.6812	11.2915	9.76562	10.6812	9.76562	10.0708	9.76562	9.46045	10.6812
49.6	12.5122	13.1226	10.9863	10.9863	10.376	10.9863	10.0708	10.376	9.76562	9.76562	10.376
49.7	13.1226	13.4277	11.2915	11.2915	10.6812	11.2915	10.0708	10.6812	10.0708	9.76562	9.76562
49.8	13.4277	13.4277	11.9019	11.5967	10.6812	11.2915	9.76562	10.9863	10.0708	9.76562	8.8501
49.9	13.7329	13.4277	12.207	11.5967	10.6812	10.9863	9.46045	10.9863	9.76562	9.46045	8.54492
50	13.1226	13.1226	12.207	11.2915	10.6812	10.376	9.15527	10.6812	9.76562	9.46045	8.8501
50.1	12.5122	12.5122	12.207	11.2915	10.9863	10.0708	9.15527	10.376	10.0708	9.46045	8.8501
50.2	12.207	11.9019	12.207	10.6812	11.5967	10.0708	9.46045	10.376	10.376	9.15527	9.15527
50.3	12.207	11.9019	11.9019	10.376	12.207	10.0708	10.0708	10.6812	10.376	8.54492	9.46045
50.4	12.207	11.9019	11.9019	10.0708	12.207	10.376	10.376	10.6812	10.0708	8.54492	9.46045
50.5	12.207	11.9019	11.5967	10.6812	11.9019	10.376	10.9863	10.376	9.46045	8.54492	9.15527
50.6	11.5967	11.9019	11.5967	11.5967	11.5967	10.6812	10.9863	10.376	9.15527	8.8501	8.54492
50.7	11.2915	11.9019	11.5967	12.207	11.2915	10.9863	11.2915	10.376	9.15527	9.46045	8.23975
50.8	11.5967	12.207	11.9019	12.5122	10.9863	10.9863	11.5967	10.0708	9.46045	10.0708	8.23975
50.9	11.9019	12.5122	12.207	12.5122	10.6812	10.9863	11.5967	10.0708	9.46045	10.6812	8.54492
51	12.5122	12.5122	12.5122	11.9019	10.9863	11.5967	11.9019	10.376	9.76562	10.6812	8.8501
51.1	13.1226	12.5122	12.207	11.5967	11.2915	11.5967	11.5967	10.6812	10.0708	10.376	9.15527
51.2	13.1226	12.207	11.9019	11.2915	12.207	11.2915	11.2915	10.6812	10.376	9.76562	9.76562
51.3	13.1226	11.9019	11.9019	11.2915	12.207	10.9863	10.9863	10.376	10.0708	9.76562	10.0708
51.4	12.8174	11.9019	11.9019	11.2915	12.207	10.6812	10.6812	10.376	9.76562	10.0708	10.0708
51.5	12.8174	12.207	12.207	11.5967	11.5967	10.376	10.376	10.376	9.15527	10.376	10.0708
51.6	12.5122	12.5122	11.9019	11.5967	11.5967	10.376	9.76562	10.376	9.15527	10.376	9.46045
51.7	12.207	12.5122	11.9019	11.5967	11.5967	10.6812	9.46045	10.0708	9.15527	10.376	9.46045
51.8	12.207	12.207	11.9019	11.2915	11.5967	11.2915	9.76562	9.46045	8.8501	10.0708	9.15527
51.9	12.207	11.5967	12.207	11.2915	11.2915	11.9019	10.0708	9.15527	8.8501	9.76562	9.46045
52	12.207	11.5967	12.207	11.2915	10.6812	11.9019	10.376	9.46045	9.15527	9.15527	9.76562
52.1	12.5122	11.9019	12.5122	11.2915	10.6812	11.9019	10.376	9.46045	9.76562	8.8501	10.0708
52.2	12.8174	12.5122	12.5122	11.2915	10.9863	11.9019	10.376	9.46045	10.0708	9.15527	10.0708
52.3	13.4277	12.8174	12.207	11.2915	10.9863	11.5967	10.6812	9.15527	10.0708	9.76562	9.46045
52.4	13.1226	13.4277	11.9019	11.2915	10.6812	11.2915	10.6812	9.46045	10.376	10.0708	8.8501
52.5	12.8174	13.7329	11.5967	11.5967	10.6812	10.9863	10.9863	9.76562	10.6812	10.0708	8.23975
52.6	12.8174	13.4277	11.5967	11.9019	10.6812	10.6812	10.9863	9.76562	10.6812	9.46045	8.23975
52.7	13.1226	12.5122	11.9019	11.9019	10.9863	10.6812	10.9863	9.46045	10.6812	8.8501	8.54492
52.8	13.1226	11.9019	12.5122	11.5967	11.2915	10.376	11.2915	9.46045	10.6812	8.8501	9.15527
52.9	13.1226	11.5967	13.1226	10.9863	10.9863	10.0708	10.9863	9.46045	10.6812	9.15527	9.46045
53	12.8174	11.5967	13.4277	10.6812	10.9863	10.0708	10.376	9.76562	10.6812	9.15527	9.46045
53.1	12.207	11.9019	13.7329	10.6812	10.6812	10.376	9.46045	10.0708	10.376	9.15527	9.76562
53.2	11.5967	12.207	14.0381	10.6812	10.6812	10.6812	8.8501	10.376	10.376	9.46045	9.46045
53.3	11.2915	12.5122	13.7329	10.6812	10.9863	10.9863	9.15527	10.6812	10.6812	9.76562	9.15527
53.4	11.2915	12.5122	13.4277	10.9863	10.9863	10.6812	9.46045	10.376	10.376	10.0708	8.8501
53.5	11.5967	12.207	12.8174	11.2915	10.9863	10.376	9.76562	10.6812	10.0708	10.376	9.15527
53.6	11.9019	11.9019	12.207	11.5967	10.6812	10.0708	10.376	10.6812	9.46045	10.376	9.76562
53.7	12.207	11.5967	11.5967	11.9019	10.0708	10.376	10.9863	10.6812	9.46045	10.376	10.376
53.8	12.207	11.5967	11.2915	11.5967	9.76562	10.9863	11.2915	10.376	9.76562	10.376	10.9863
53.9	12.207	11.2915	10.6812	11.2915	10.376	11.5967	11.2915	10.0708	10.0708	10.0708	10.9863
54	12.207	11.2915	10.0708	10.9863	10.9863	11.2915	10.9863	10.0708	10.376	10.0708	10.376
54.1	12.207	11.9019	10.0708	10.6812	10.9863	10.376	10.6812	10.0708	10.376	9.76562	10.0708
54.2	12.5122	12.207	10.9863	10.9863	10.6812	9.46045	10.0708	10.0708	10.376	9.15527	9.76562
54.3	13.1226	12.8174	11.5967	11.5967	10.6812	9.46045	10.0708	10.376	10.376	9.46045	9.15527
54.4	13.7329	13.1226	12.207	11.5967	10.6812	9.76563	10.0708	10.0708	10.376	9.46045	8.54492
54.5	14.0381	13.1226	12.5122	11.2915	10.6812	10.0708	10.376	9.46045	10.376	9.15527	8.54492
54.6	13.4277	12.8174	12.5122	10.9863	10.376	10.376	10.376	9.46045	10.0708	9.15527	9.15527
54.7	12.207	12.8174	12.5122	10.9863	10.0708	10.6812	10.6812	9.46045	9.15527	9.15527	9.15527
54.8	11.5967	12.8174	11.9019	10.9863	10.0708	10.6812	10.9863	9.76562	8.54492	9.15527	9.15527
54.9	11.2915	12.8174	11.5967	10.9863	10.6812	11.2915	10.9863	9.76562	8.23975	9.15527	8.54492
55	11.9019	12.5122	11.5967	10.9863	11.5967	11.5967	10.376	10.376	7.93457	9.46045	8.23975
55.1	12.207	12.207	11.5967	11.2915	12.207	11.2915	9.46045	10.376	8.23975	9.46045	8.23975
55.2	12.5122	11.5967	11.5967	11.9019	12.5122	10.9863	9.15527	10.0708	8.54492	9.76562	8.23975
55.3	12.5122	11.9019	12.207	11.9019	12.207	10.9863	8.8501	9.76562	8.8501	10.0708	8.23975
55.4	12.207	12.207	12.8174	11.9019	11.5967	10.9863	8.8501	9.46045	9.15527	10.376	8.23975
55.5	12.207	12.8174	12.5122	11.2915	11.2915	10.9863	8.8501	9.76562	9.46045	10.6812	8.54492
55.6	12.8174	12.8174	11.9019	10.9863	10.9863	10.6812	9.15527	10.0708	9.76562	10.6812	9.15527
55.7	13.4277	12.5122	11.9019	10.9863	10.6812	10.376	9.76562	10.0708	10.0708	10.0708	9.76562
55.8	13.4277	11.9019	12.207	10.9863	10.6812	10.376	10.0708	10.376	10.376	9.15527	10.0708
55.9	12.8174	11.5967	12.8174	10.6812	10.6812	10.6812	10.376	10.376	10.6812	8.8501	10.6812
56	11.9019	11.2915	13.1226	10.6812	10.6812	11.2915	10.6812	10.6812	10.9863	8.8501	10.9863
56.1	11.9019	10.9863	12.5122	11.2915	10.9863	11.2915	10.6812	10.376	10.9863	8.8501	10.9863
56.2	12.5122	10.9863	11.9019	11.9019	10.9863	10.6812	10.9863	10.0708	10.9863	9.46045	10.376
56.3	13.1226	11.5967	10.9863	12.207	10.9863	10.376	10.6812	9.46045	10.6812	9.76562	9.76562
56.4	13.7329	12.207	10.6812	11.9019	10.6812	9.76563	10.376	9.15527	9.76562	10.0708	9.15527
56.5	13.7329	12.5122	10.9863	11.5967	10.0708	9.76563	10.376	9.15527	8.8501	10.0708	8.54492
56.6	13.4277	12.5122	11.2915	11.2915	10.0708	9.76563	9.76562	8.8501	8.54492	9.76562	8.23975
56.7	12.5122	12.5122	11.2915	10.9863	10.0708	9.46045	9.46045	8.54492	8.54492	9.76562	8.54492
56.8	11.9019	12.5122	10.9863	10.9863	10.376	9.15527	9.15527	8.54492	8.8501	9.46045	8.8501
56.9	11.5967	12.8174	10.9863	11.2915	10.6812	9.46045	9.15527	8.54492	9.15527	9.15527	9.15527
57	11.9019	12.8174	11.2915	11.5967	10.6812	10.0708	9.15527	9.15527	10.0708	9.15527	9.46045
57.1	12.207	13.1226	11.9019	11.9019	10.376	10.376	9.46045	9.76562	10.6812	9.15527	9.46045
57.2	12.207	13.1226	12.5122	12.207	10.6812	10.6812	9.76562	10.376	10.6812	9.15527	9.15527
57.3	12.207	13.1226	12.5122	11.9019	10.9863	10.6812	10.0708	10.6812	10.376	9.15527	8.8501
57.4	11.5967	13.1226	12.207	11.5967	11.2915	10.9863	10.376	10.376	9.76562	9.76562	8.8501
57.5	10.9863	12.8174	11.9019	10.9863	11.5967	11.2915	10.376	10.0708	9.46045	10.376	9.15527
57.6	10.6812	12.5122	11.5967	10.9863	11.2915	11.2915	10.376	9.76562	9.46045	10.6812	9.46045
57.7	11.2915	11.9019	11.2915	11.2915	11.2915	11.2915	10.376	9.46045	9.46045	10.9863	9.46045
57.8	11.9019	11.2915	10.9863	11.5967	10.6812	10.9863	10.376	9.15527	9.76562	10.6812	9.46045
57.9	12.207	10.9863	10.9863	11.9019	10.376	11.2915	10.0708	9.15527	10.0708	10.376	9.15527
58	-29.9072	-28.0762	-22.2778	-14.3433	-5.18799	10.9863	26.8555	37.8418	47.3022	52.7954	55.2368
58.1	-619.812	-529.175	-418.701	-294.495	-158.997	10.6812	187.378	333.252	467.529	582.581	680.542
58.2	-1990.66	-1650.7	-1277.16	-879.822	-467.834	10.0708	506.592	942.078	1362.61	1753.54	2117
58.3	-3470.76	-2836.61	-2167.97	-1474.91	-772.095	9.46045	817.261	1550.6	2275.09	2971.8	3643.19
58.4	-4382.02	-3550.42	-2693.48	-1817.63	-938.721	8.8501	983.887	1890.87	2797.85	3684.69	4555.66
58.5	-4542.85	-3659.97	-2762.45	-1853.94	-946.655	8.8501	987.549	1914.98	2848.51	3770.14	4684.75
58.6	-4151.61	-3331.91	-2505.8	-1675.11	-847.473	9.15527	881.958	1722.11	2569.27	3412.17	4251.71
58.7	-3506.16	-2806.4	-2105.1	-1403.2	-704.041	9.46045	733.948	1439.21	2150.57	2861.63	3571.47
58.8	-2830.81	-2261.66	-1693.73	-1126.4	-560.913	10.0708	588.074	1154.79	1726.68	2300.72	2873.23
58.9	-2238.16	-1786.19	-1335.45	-886.23	-438.232	10.0708	463.562	910.95	1362	1815.8	2267.76
59	-1759.03	-1402.59	-1047.06	-693.97	-340.576	10.376	364.99	716.248	1070.25	1427.61	1782.53
59.1	-1384.28	-1103.21	-822.449	-544.128	-265.198	10.6812	288.391	565.186	843.811	1126.1	1405.64
59.2	-1094.06	-870.972	-648.193	-428.162	-207.52	10.9863	229.187	448.303	668.945	893.555	1114.2
59.3	-868.53	-690.002	-512.39	-338.135	-162.659	11.2915	183.105	357.056	533.142	713.501	888.672
59.4	-692.139	-548.401	-406.189	-267.944	-127.563	10.9863	147.4	286.56	427.246	573.425	713.501
59.5	-554.199	-437.317	-323.181	-212.708	-99.7925	10.6812	120.239	231.628	344.849	464.478	577.698
59.6	-446.167	-350.342	-258.789	-169.373	-78.125	10.376	98.877	189.209	280.762	379.028	472.412
59.7	-362.244	-282.593	-208.435	-135.498	-61.0352	10.0708	82.3975	156.25	231.018	312.195	390.32
59.8	-296.936	-229.492	-169.373	-109.253	-47.6074	10.376	69.8853	130.615	191.956	259.399	326.538
59.9	-246.277	-188.904	-138.55	-88.501	-37.8418	10.6812	59.2041	110.474	161.743	218.506	276.489
60	-206.299	-157.471	-114.441	-72.0215	-30.2124	10.9863	50.9644	94.6045	137.939	187.073	237.427
60.1	-174.866	-132.751	-95.52	-58.8989	-24.4141	10.9863	44.8608	81.7871	119.629	162.964	206.909
60.2	-149.841	-113.525	-80.8716	-48.8281	-19.2261	10.6812	39.978	72.0215	105.591	144.653	182.8
60.3	-130.615	-97.9614	-69.2749	-41.1987	-15.2588	10.0708	36.6211	64.0869	94.9097	130.615	163.879
60.4	-115.356	-85.4492	-59.8145	-35.0952	-11.9019	10.0708	33.8745	57.9834	86.6699	119.324	148.926
60.5	-103.149	-75.3784	-51.8799	-30.5176	-8.8501	10.376	32.0435	53.4058	80.2612	110.779	137.329
60.6	-93.3838	-67.1387	-45.4712	-26.2451	-6.71387	10.6812	30.5176	50.0488	74.7681	103.455	128.784
60.7	-85.4492	-60.73	-40.5884	-22.8882	-4.88281	10.9863	28.9917	47.3022	69.8853	97.3511	122.07
60.8	-78.7354	-55.542	-36.9263	-20.4468	-3.96729	11.2915	27.771	44.8608	65.918	92.4683	116.577
60.9	-73.2422	-51.5747	-33.8745	-18.3105	-3.66211	11.2915	26.8555	42.7246	62.8662	88.8062	112
61	-68.3594	-48.2178	-31.4331	-16.7847	-3.05176	10.9863	25.9399	40.8936	60.73	85.7544	108.337
61.1	-64.3921	-45.166	-29.2969	-15.8691	-2.44141	10.6812	25.3296	39.0625	58.8989	82.7026	105.286
61.2	-61.6455	-42.7246	-27.4658	-14.9536	-2.13623	10.376	24.4141	37.8418	57.9834	80.2612	102.844
61.3	-59.5093	-40.8936	-26.2451	-14.6484	-1.83105	10.0708	23.8037	36.9263	57.0679	78.125	101.013
61.4	-57.9834	-39.3677	-25.3296	-14.0381	-1.2207	10.0708	22.8882	36.6211	56.1523	76.5991	99.4873
61.5	-56.7627	-38.4521	-25.0244	-13.4277	-0.915527	10.0708	22.583	36.3159	55.542	75.0732	97.6562
61.6	-55.542	-37.5366	-25.0244	-12.8174	-0.610352	10.0708	22.583	36.3159	54.6265	73.8525	96.1304
61.7	-54.3213	-36.9263	-24.7192	-11.9019	-0.305176	10.0708	22.8882	36.3159	53.4058	72.937	94.6045
61.8	-52.7954	-36.0107	-24.1089	-10.9863	0	10.0708	22.8882	36.0107	52.4902	72.6318	93.689
61.9	-51.5747	-35.0952	-23.1934	-10.0708	0.610352	9.76563	22.583	35.4004	51.5747	72.3267	93.0786
62	-50.354	-34.4849	-22.2778	-9.46045	0.610352	9.46045	21.6675	35.0952	50.6592	71.7163	92.4683
62.1	-49.4385	-34.1797	-21.0571	-9.46045	0.305176	9.15527	21.6675	35.0952	50.0488	71.4111	91.8579
62.2	-48.8281	-34.1797	-20.1416	-9.46045	0	8.8501	21.9727	35.4004	50.0488	70.8008	91.2476
62.3	-48.5229	-33.8745	-20.1416	-9.76562	0.305176	9.15527	22.2778	35.4004	50.0488	70.4956	90.6372
62.4	-48.2178	-33.5693	-20.4468	-10.0708	0.915527	9.76563	22.583	35.4004	49.7437	69.2749	90.0269
62.5	-47.9126	-32.6538	-21.3623	-10.376	1.2207	10.376	22.583	35.4004	49.4385	68.0542	89.4165
62.6	-47.6074	-31.7383	-21.6675	-10.376	1.52588	10.6812	22.2778	35.4004	48.8281	67.4438	88.8062
62.7	-47.3022	-31.4331	-21.3623	-9.76562	0.915527	10.9863	21.9727	35.0952	48.2178	67.1387	88.1958
62.8	-46.6919	-31.1279	-20.752	-9.15527	0.610352	10.9863	21.6675	34.4849	48.2178	67.1387	87.5854
62.9	-46.0815	-30.5176	-19.8364	-8.8501	0.305176	10.9863	21.6675	33.8745	47.9126	66.8335	87.8906
63	-45.7764	-30.2124	-19.2261	-7.93457	0	10.6812	21.6675	33.2642	47.6074	66.8335	88.1958
63.1	-45.4712	-29.9072	-18.9209	-7.32422	0	10.6812	21.3623	32.6538	47.9126	67.4438	88.1958
63.2	-45.166	-29.9072	-18.9209	-6.71387	0	10.376	20.752	32.0435	48.5229	68.0542	87.5854
63.3	-44.8608	-30.2124	-18.9209	-6.40869	0.305176	10.376	19.8364	32.0435	49.1333	67.749	86.9751
63.4	-44.2505	-30.5176	-18.6157	-6.71387	0.610352	10.376	19.5312	32.3486	49.1333	67.4438	86.3647
63.5	-43.335	-30.5176	-18.3105	-7.62939	0.305176	10.376	20.1416	32.6538	48.8281	66.8335	85.7544
63.6	-42.7246	-30.5176	-18.3105	-8.23975	0.610352	10.376	20.752	32.6538	47.9126	66.2231	85.4492
63.7	-41.8091	-29.9072	-18.3105	-9.15527	0.915527	10.6812	21.3623	32.3486	47.3022	65.918	85.4492
63.8	-41.1987	-28.9917	-18.9209	-9.46045	1.52588	11.2915	21.3623	31.7383	46.9971	65.918	85.4492
63.9	-40.8936	-28.0762	-19.2261	-8.8501	2.13623	11.5967	21.0571	32.0435	47.3022	65.918	85.4492
64	-41.1987	-28.0762	-18.6157	-7.62939	2.44141	11.2915	21.0571	32.6538	47.6074	65.6128	85.144
64.1	-41.8091	-28.3813	-17.7002	-6.71387	3.05176	10.9863	20.752	33.2642	47.6074	65.0024	84.8389
64.2	-42.1143	-28.3813	-16.7847	-6.71387	2.74658	10.6812	20.752	33.2642	46.9971	64.6973	84.5337
64.3	-41.5039	-28.3813	-16.7847	-7.01904	2.13623	10.6812	20.752	32.959	46.0815	64.6973	84.5337
64.4	-40.5884	-28.3813	-16.7847	-7.32422	1.52588	10.6812	20.1416	32.959	45.7764	64.3921	84.5337
64.5	-40.2832	-28.6865	-17.0898	-7.32422	1.2207	10.6812	20.1416	32.6538	46.0815	64.0869	84.5337
64.6	-40.2832	-28.9917	-17.0898	-7.32422	1.2207	10.376	20.4468	32.3486	46.6919	64.0869	84.8389
64.7	-39.978	-28.9917	-16.7847	-7.62939	1.2207	10.0708	21.0571	32.3486	47.3022	63.7817	84.5337
64.8	-39.978	-28.6865	-16.1743	-7.93457	1.2207	9.46045	21.3623	32.6538	47.3022	64.0869	84.2285
64.9	-39.6729	-27.771	-15.8691	-7.93457	1.52588	8.8501	21.6675	32.6538	46.6919	64.0869	83.9233
65	-39.6729	-26.5503	-16.1743	-7.62939	1.52588	8.8501	21.6675	32.959	46.0815	64.0869	83.6182
65.1	-39.3677	-25.9399	-16.1743	-7.32422	1.83105	9.15527	21.3623	33.2642	46.0815	64.0869	83.6182
65.2	-39.0625	-25.9399	-16.1743	-7.32422	2.44141	10.0708	21.0571	32.6538	46.3867	63.7817	83.6182
65.3	-38.7573	-26.5503	-15.8691	-7.01904	3.35693	10.6812	20.752	32.3486	46.6919	64.0869	83.6182
65.4	-38.4521	-26.8555	-15.8691	-6.71387	3.96729	10.9863	20.752	32.0435	46.6919	63.7817	83.0078
65.5	-38.147	-26.5503	-15.8691	-6.40869	3.96729	10.9863	21.0571	31.7383	46.0815	63.4766	82.7026
65.6	-37.8418	-25.9399	-16.1743	-6.10352	3.35693	10.6812	21.0571	31.7383	45.4712	63.1714	82.3975
65.7	-37.2314	-25.6348	-16.1743	-5.79834	2.44141	10.6812	20.752	32.0435	44.2505	62.8662	82.0923
65.8	-36.3159	-24.7192	-16.1743	-5.79834	1.52588	10.9863	20.1416	32.0435	43.0298	62.561	82.0923
65.9	-35.7056	-24.1089	-15.8691	-6.71387	0.915527	11.2915	19.2261	32.0435	42.7246	62.561	82.0923
66	-35.7056	-23.8037	-15.564	-7.32422	0.915527	11.5967	19.2261	31.7383	43.335	62.2559	82.3975
66.1	-36.0107	-23.8037	-15.2588	-7.62939	0.915527	11.5967	19.5312	31.4331	44.2505	61.9507	82.7026
66.2	-36.3159	-24.4141	-15.564	-7.62939	1.2207	11.5967	20.1416	31.1279	45.166	61.6455	82.7026
66.3	-36.6211	-25.0244	-15.2588	-7.62939	1.52588	11.9019	20.4468	31.1279	45.4712	61.6455	82.7026
66.4	-36.6211	-25.9399	-14.9536	-7.32422	1.83105	11.9019	20.1416	30.8228	45.7764	61.6455	82.3975
66.5	-36.3159	-26.2451	-14.9536	-6.71387	2.13623	11.2915	19.8364	30.8228	46.0815	61.6455	82.3975
66.6	-36.0107	-26.2451	-14.9536	-6.40869	2.13623	10.376	19.8364	30.5176	46.0815	61.6455	82.7026
66.7	-35.4004	-26.2451	-14.6484	-6.40869	1.83105	9.76563	19.8364	30.5176	46.0815	61.6455	83.0078
66.8	-34.79	-26.2451	-14.3433	-6.71387	1.83105	9.76563	20.1416	30.8228	45.7764	61.6455	82.7026
66.9	-34.4849	-25.6348	-14.3433	-6.71387	1.52588	10.0708	20.1416	31.1279	45.166	61.3403	82.3975
67	-34.4849	-25.0244	-14.0381	-6.40869	1.52588	10.376	20.1416	31.1279	44.8608	60.73	82.0923
67.1	-34.79	-24.7192	-14.0381	-5.49316	1.52588	10.376	20.1416	31.4331	45.166	60.73	82.0923
67.2	-35.0952	-24.7192	-14.6484	-5.18799	1.83105	9.76563	20.4468	31.7383	45.166	61.0352	81.7871
67.3	-35.7056	-24.4141	-15.2588	-5.18799	2.44141	9.46045	21.0571	32.0435	45.4712	61.0352	81.7871
67.4	-36.0107	-24.1089	-15.8691	-5.18799	3.05176	9.46045	21.0571	32.3486	45.4712	61.3403	81.7871
67.5	-35.7056	-24.1089	-15.8691	-4.88281	3.35693	9.76563	21.0571	32.0435	45.7764	61.3403	81.7871
67.6	-35.0952	-24.1089	-15.564	-4.88281	3.35693	10.376	20.4468	31.4331	45.4712	61.3403	81.4819
67.7	-34.4849	-24.4141	-14.9536	-4.88281	3.35693	10.9863	20.1416	30.8228	45.4712	61.0352	81.4819
67.8	-33.5693	-24.1089	-14.6484	-5.49316	3.35693	11.5967	19.8364	30.5176	44.8608	60.4248	81.4819
67.9	-33.2642	-23.8037	-14.3433	-5.49316	2.74658	11.5967	20.1416	30.8228	44.5557	59.8145	81.4819
68	-33.2642	-23.1934	-14.0381	-5.49316	2.13623	11.5967	20.4468	31.1279	44.2505	59.2041	81.1768
68.1	-33.5693	-22.8882	-14.0381	-5.49316	1.83105	11.2915	20.752	31.1279	43.9453	59.2041	80.8716
68.2	-33.5693	-22.583	-13.7329	-6.10352	1.83105	10.9863	20.752	31.7383	43.9453	59.5093	80.2612
68.3	-33.8745	-22.2778	-13.4277	-6.40869	2.13623	10.6812	20.4468	32.3486	44.2505	59.5093	79.6509
68.4	-33.8745	-22.583	-13.4277	-6.10352	2.44141	10.376	20.1416	32.3486	44.2505	59.2041	79.3457
68.5	-33.5693	-22.8882	-13.7329	-5.79834	2.13623	10.376	20.1416	32.0435	43.9453	59.2041	79.3457
68.6	-33.2642	-23.4985	-13.7329	-5.49316	2.13623	10.6812	19.8364	31.1279	43.9453	59.2041	79.0405
68.7	-32.959	-23.8037	-13.4277	-5.18799	2.44141	10.6812	19.8364	30.2124	43.335	59.5093	79.0405
68.8	-32.6538	-23.4985	-13.4277	-5.18799	2.74658	10.9863	19.8364	29.6021	43.0298	60.1196	79.3457
68.9	-32.3486	-23.1934	-13.4277	-5.18799	3.05176	10.9863	19.8364	30.2124	42.7246	60.73	79.6509
69	-32.6538	-23.1934	-13.4277	-5.18799	2.74658	10.376	19.5312	30.8228	42.7246	61.0352	80.2612
69.1	-33.2642	-22.8882	-13.4277	-5.18799	2.44141	9.76563	19.2261	31.1279	43.335	61.3403	80.2612
69.2	-33.8745	-22.583	-13.4277	-4.88281	2.13623	9.15527	19.5312	31.1279	44.2505	61.6455	80.2612
69.3	-33.8745	-22.583	-13.4277	-5.18799	1.83105	9.15527	19.8364	31.4331	44.8608	61.9507	79.9561
69.4	-33.5693	-22.583	-13.7329	-5.18799	2.13623	9.46045	20.1416	31.7383	45.166	61.6455	79.6509
69.5	-32.959	-22.8882	-14.0381	-5.49316	2.13623	10.0708	20.1416	31.7383	45.166	61.0352	79.0405
69.6	-32.0435	-22.583	-14.0381	-5.49316	2.13623	10.6812	20.1416	31.7383	44.8608	60.73	78.4302
69.7	-31.7383	-22.2778	-13.7329	-5.49316	2.13623	10.9863	20.752	31.4331	44.2505	60.4248	78.7354
69.8	-31.7383	-22.2778	-13.1226	-5.79834	2.13623	10.6812	20.752	31.1279	43.335	60.73	79.0405
69.9	-31.4331	-22.2778	-12.5122	-5.49316	2.13623	10.376	20.4468	30.8228	43.335	60.73	79.0405
70	-30.8228	-21.9727	-12.5122	-5.18799	2.13623	10.376	19.8364	30.5176	43.6401	60.73	78.4302
70.1	-30.5176	-21.6675	-12.8174	-4.88281	2.44141	10.6812	19.8364	30.2124	44.2505	60.4248	78.125
70.2	-30.2124	-21.3623	-13.4277	-5.18799	2.44141	10.6812	19.8364	30.2124	44.5557	60.4248	78.4302
70.3	-30.5176	-21.3623	-13.4277	-5.79834	2.44141	10.6812	20.1416	30.5176	44.2505	60.4248	78.7354
70.4	-30.8228	-21.0571	-13.4277	-5.79834	2.13623	10.9863	20.4468	30.5176	44.2505	60.4248	78.4302
70.5	-30.8228	-21.3623	-13.4277	-5.79834	2.44141	11.5967	20.1416	30.8228	44.5557	60.4248	77.8198
70.6	-30.8228	-21.6675	-13.1226	-5.18799	3.35693	11.5967	19.8364	30.5176	44.2505	60.1196	77.2095
70.7	-30.2124	-21.6675	-12.8174	-4.57764	3.66211	11.2915	19.2261	30.2124	43.9453	60.1196	76.9043
70.8	-29.9072	-21.9727	-12.5122	-4.57764	3.66211	10.376	18.9209	30.2124	43.335	59.8145	77.2095
70.9	-30.2124	-22.2778	-12.207	-4.88281	3.35693	10.0708	19.2261	30.2124	43.0298	60.1196	77.2095
71	-30.5176	-22.583	-12.207	-5.18799	3.05176	10.0708	19.8364	30.2124	42.7246	60.4248	76.9043
71.1	-30.5176	-22.583	-12.8174	-5.18799	3.05176	10.0708	20.4468	30.2124	43.335	60.4248	76.9043
71.2	-30.2124	-22.583	-13.4277	-4.88281	3.05176	10.376	20.752	30.2124	43.9453	59.8145	76.9043
71.3	-29.9072	-22.2778	-13.4277	-4.57764	3.35693	10.376	21.0571	30.5176	44.2505	59.5093	77.2095
71.4	-29.9072	-21.3623	-13.4277	-4.57764	3.35693	10.6812	21.6675	30.5176	43.9453	59.5093	77.2095
71.5	-29.9072	-20.752	-13.4277	-4.88281	3.05176	10.6812	21.0571	30.2124	43.0298	59.5093	77.2095
71.6	-29.9072	-20.4468	-13.4277	-4.57764	3.05176	10.6812	20.1416	30.5176	42.1143	59.8145	76.9043
71.7	-29.6021	-20.752	-13.1226	-4.27246	3.05176	10.376	19.2261	31.1279	41.8091	60.4248	76.5991
71.8	-29.2969	-20.752	-12.8174	-3.96729	3.05176	9.46045	19.2261	31.1279	42.1143	61.3403	76.2939
71.9	-28.9917	-21.0571	-12.5122	-3.66211	2.44141	9.15527	19.5312	31.1279	43.0298	61.9507	75.9888
72	-29.2969	-20.752	-12.207	-3.96729	2.44141	9.46045	19.5312	30.8228	43.9453	61.9507	75.9888
72.1	-29.6021	-20.1416	-12.207	-4.57764	2.44141	9.46045	19.5312	30.2124	44.2505	61.6455	75.9888
72.2	-29.2969	-19.8364	-12.8174	-5.18799	2.74658	9.76563	19.5312	29.9072	43.9453	61.0352	76.2939
72.3	-28.6865	-19.8364	-12.8174	-5.79834	2.74658	10.0708	18.9209	29.9072	43.6401	60.1196	76.2939
72.4	-28.6865	-20.1416	-12.8174	-6.10352	2.44141	10.0708	18.9209	30.2124	43.6401	59.5093	76.2939
72.5	-29.2969	-20.4468	-12.8174	-6.10352	2.44141	10.376	19.2261	30.8228	43.6401	58.8989	76.9043
72.6	-29.9072	-21.0571	-13.1226	-5.49316	2.44141	10.0708	19.5312	31.1279	43.335	58.8989	77.2095
72.7	-30.2124	-21.6675	-14.0381	-4.88281	2.44141	10.0708	19.8364	31.1279	43.335	59.2041	76.9043
72.8	-30.2124	-21.6675	-14.0381	-4.88281	2.74658	10.0708	20.1416	30.8228	43.335	59.8145	76.5991
72.9	-30.2124	-21.6675	-13.1226	-4.57764	3.05176	10.376	20.4468	30.5176	43.335	60.1196	75.9888
73	-29.9072	-21.0571	-11.9019	-4.27246	3.05176	10.376	20.752	30.2124	43.0298	60.1196	75.9888
73.1	-29.6021	-20.752	-11.2915	-3.96729	2.74658	10.6812	20.752	30.2124	43.0298	59.8145	76.5991
73.2	-28.9917	-20.4468	-10.9863	-3.96729	2.44141	10.9863	20.4468	30.2124	43.0298	59.8145	77.2095
73.3	-28.6865	-20.4468	-11.2915	-3.96729	2.44141	10.9863	19.8364	29.6021	43.335	59.5093	77.8198
73.4	-27.771	-20.4468	-11.2915	-3.96729	2.13623	10.9863	19.2261	29.2969	43.6401	59.2041	78.125
73.5	-27.4658	-20.4468	-11.9019	-3.96729	2.44141	11.2915	18.6157	29.2969	43.6401	58.8989	78.125
73.6	-27.4658	-20.752	-12.207	-3.96729	2.44141	11.2915	18.3105	29.6021	43.6401	58.8989	77.5146
73.7	-27.771	-21.0571	-12.207	-3.96729	2.44141	10.6812	18.6157	29.9072	43.335	59.2041	77.2095
73.8	-28.6865	-20.752	-11.5967	-4.57764	2.13623	10.6812	19.5312	30.2124	43.335	59.2041	76.9043
73.9	-28.9917	-20.752	-11.2915	-5.18799	2.13623	10.376	20.1416	30.2124	43.335	59.5093	76.9043
74	-29.2969	-20.752	-11.2915	-5.49316	2.44141	10.376	20.4468	30.2124	43.6401	59.8145	76.5991
74.1	-28.9917	-20.1416	-11.5967	-5.18799	2.74658	10.0708	20.4468	30.2124	43.6401	59.5093	75.9888
74.2	-28.9917	-19.8364	-12.207	-5.18799	2.74658	10.0708	20.4468	29.9072	43.6401	59.2041	75.6836
74.3	-28.9917	-19.5312	-12.5122	-4.88281	3.05176	10.376	20.4468	29.6021	43.0298	58.8989	75.9888
74.4	-28.6865	-19.8364	-12.8174	-5.18799	3.05176	10.376	20.1416	29.6021	42.7246	58.5937	76.2939
74.5	-28.6865	-19.8364	-12.8174	-5.49316	2.74658	10.0708	20.1416	30.2124	43.0298	58.8989	76.5991
74.6	-28.3813	-19.5312	-12.8174	-5.49316	2.13623	9.76563	19.5312	30.8228	43.335	58.8989	76.5991
74.7	-27.771	-19.5312	-12.5122	-5.49316	2.13623	9.46045	19.5312	31.7383	43.335	59.2041	76.2939
74.8	-28.0762	-19.8364	-11.9019	-5.18799	2.74658	10.0708	19.5312	31.7383	42.7246	59.8145	75.6836
74.9	-28.3813	-20.1416	-11.9019	-4.88281	3.05176	10.9863	19.5312	31.1279	42.4194	60.1196	75.3784
75	-28.6865	-20.4468	-11.5967	-4.57764	2.74658	11.5967	19.2261	30.2124	42.4194	59.8145	74.4629
75.1	-28.3813	-20.752	-11.5967	-4.27246	2.44141	11.5967	18.9209	29.6021	42.7246	59.5093	74.1577
75.2	-28.0762	-21.0571	-11.5967	-4.57764	1.83105	10.9863	18.9209	29.2969	42.7246	59.2041	74.1577
75.3	-27.4658	-21.0571	-11.2915	-4.57764	1.52588	10.0708	18.6157	29.2969	43.0298	58.8989	73.8525
75.4	-26.5503	-20.4468	-10.6812	-4.57764	1.83105	9.46045	18.3105	29.9072	43.0298	58.5937	73.8525
75.5	-26.2451	-19.8364	-10.0708	-4.57764	2.44141	9.15527	18.6157	29.9072	42.7246	58.2886	73.8525
75.6	-26.5503	-19.2261	-10.0708	-4.57764	2.74658	9.76563	19.2261	29.9072	42.4194	58.5937	74.4629
75.7	-27.1606	-19.2261	-10.376	-4.88281	2.74658	10.6812	19.5312	29.9072	42.1143	58.5937	74.7681
75.8	-27.4658	-19.5312	-11.5967	-5.18799	2.44141	11.5967	19.8364	29.9072	42.1143	58.2886	74.7681
75.9	-27.4658	-19.8364	-12.5122	-5.18799	2.44141	11.9019	19.8364	29.9072	42.4194	57.9834	74.4629
76	-27.1606	-19.8364	-12.8174	-4.88281	1.83105	11.2915	19.5312	30.5176	42.7246	57.9834	74.4629
76.1	-27.1606	-19.2261	-13.4277	-4.27246	1.52588	10.0708	19.2261	30.8228	42.7246	57.9834	74.1577
76.2	-26.8555	-18.6157	-13.7329	-3.96729	1.2207	9.15527	18.9209	30.8228	42.4194	57.9834	73.2422
76.3	-26.8555	-18.9209	-13.4277	-3.96729	1.2207	8.8501	18.6157	29.9072	42.4194	57.6782	72.3267
76.4	-26.8555	-19.5312	-13.1226	-3.96729	1.83105	8.8501	18.3105	29.2969	42.4194	57.373	72.0215
76.5	-26.8555	-20.1416	-12.5122	-4.27246	2.13623	9.15527	18.3105	28.6865	43.0298	57.373	72.0215
76.6	-27.1606	-20.1416	-12.207	-4.27246	2.74658	9.76563	18.6157	28.6865	43.335	57.373	72.6318
76.7	-27.1606	-20.1416	-11.9019	-4.88281	3.35693	10.6812	18.9209	29.2969	43.335	57.6782	72.937
76.8	-27.1606	-19.8364	-11.9019	-5.49316	3.66211	10.9863	19.2261	30.2124	43.335	57.9834	72.937
76.9	-27.4658	-19.8364	-12.5122	-5.49316	3.96729	10.6812	19.2261	30.8228	43.0298	58.5937	72.937
77	-27.4658	-19.5312	-12.8174	-5.18799	3.66211	10.376	19.5312	30.5176	43.0298	58.8989	73.2422
77.1	-27.4658	-19.5312	-13.1226	-3.96729	3.05176	9.76563	19.5312	30.2124	43.0298	59.5093	73.8525
77.2	-27.4658	-19.5312	-13.1226	-3.35693	2.74658	9.76563	19.5312	29.6021	43.335	59.5093	74.1577
77.3	-27.1606	-19.5312	-12.5122	-3.35693	2.74658	9.76563	19.2261	28.9917	43.335	59.2041	73.8525
77.4	-26.8555	-19.5312	-12.207	-3.66211	3.05176	10.0708	19.2261	28.9917	43.335	58.8989	73.5474
77.5	-26.2451	-19.8364	-11.5967	-4.27246	3.35693	10.376	19.2261	29.2969	43.335	58.5937	72.937
77.6	-25.9399	-19.2261	-11.2915	-4.57764	3.35693	10.6812	19.2261	29.9072	43.335	58.2886	72.3267
77.7	-25.9399	-18.6157	-11.2915	-5.18799	3.05176	10.6812	19.5312	30.5176	43.0298	57.9834	72.0215
77.8	-26.2451	-17.7002	-11.2915	-5.18799	2.74658	10.376	19.2261	30.5176	42.4194	57.6782	71.7163
77.9	-26.5503	-17.7002	-10.9863	-5.18799	2.13623	10.376	18.9209	30.2124	41.8091	57.6782	72.0215
78	-26.5503	-18.0054	-10.6812	-5.49316	2.13623	10.376	18.9209	29.6021	41.1987	57.9834	72.6318
78.1	-26.2451	-18.3105	-10.376	-5.18799	2.44141	10.376	19.2261	29.6021	41.1987	58.5937	72.6318
78.2	-25.9399	-19.2261	-10.376	-4.57764	2.44141	10.376	19.2261	29.6021	41.8091	58.5937	72.6318
78.3	-25.6348	-19.5312	-10.6812	-3.96729	2.44141	10.376	19.5312	29.9072	42.4194	58.2886	72.3267
78.4	-25.9399	-19.5312	-11.2915	-3.66211	2.44141	9.76563	19.5312	29.6021	42.4194	57.373	72.3267
78.5	-25.9399	-19.2261	-12.207	-3.35693	2.44141	9.46045	19.8364	29.2969	42.1143	56.7627	72.3267
78.6	-25.9399	-18.6157	-12.5122	-3.66211	2.13623	9.15527	19.5312	29.2969	42.1143	56.4575	72.3267
78.7	-25.9399	-17.7002	-11.9019	-4.27246	1.83105	8.8501	19.2261	29.9072	42.4194	56.1523	72.3267
78.8	-25.6348	-17.0898	-11.2915	-4.57764	1.2207	8.8501	18.9209	29.9072	42.4194	56.1523	72.0215
78.9	-25.3296	-17.395	-10.9863	-4.27246	0.915527	9.46045	18.9209	29.6021	42.4194	56.1523	72.0215
79	-25.6348	-18.0054	-10.9863	-3.96729	0.915527	10.376	18.6157	29.6021	42.1143	56.4575	72.3267
79.1	-25.6348	-18.3105	-11.2915	-3.96729	1.52588	10.6812	18.3105	29.6021	42.1143	56.7627	72.3267
79.2	-25.6348	-18.6157	-11.5967	-3.96729	2.13623	10.9863	18.6157	29.9072	42.1143	57.0679	72.937
79.3	-25.0244	-18.6157	-12.207	-3.96729	2.74658	10.9863	19.2261	30.2124	42.4194	57.6782	73.2422
79.4	-24.4141	-18.6157	-12.5122	-3.66211	3.35693	10.9863	19.2261	30.2124	42.4194	57.9834	72.6318
79.5	-24.4141	-18.0054	-12.207	-3.96729	3.66211	11.2915	18.9209	30.5176	43.0298	57.6782	72.0215
79.6	-24.4141	-17.7002	-11.9019	-4.27246	3.96729	11.2915	18.3105	30.5176	42.7246	57.373	72.3267
79.7	-24.4141	-17.7002	-11.2915	-4.57764	3.96729	11.2915	18.0054	30.5176	42.1143	57.0679	72.937
79.8	-25.0244	-18.0054	-11.2915	-4.88281	3.96729	10.9863	18.0054	29.9072	41.8091	57.0679	73.5474
79.9	-25.3296	-18.3105	-10.9863	-5.49316	3.66211	10.6812	18.3105	29.2969	42.4194	56.7627	74.1577
80	-25.9399	-18.3105	-10.6812	-5.49316	3.05176	9.76563	18.6157	28.9917	42.7246	56.7627	74.4629
80.1	-26.5503	-18.3105	-10.6812	-5.18799	2.44141	9.46045	19.2261	29.2969	43.0298	56.7627	74.4629
80.2	-26.5503	-18.0054	-10.6812	-4.57764	1.83105	10.0708	19.5312	29.2969	43.335	57.373	73.8525
80.3	-26.8555	-17.7002	-10.6812	-4.57764	1.83105	10.6812	19.5312	29.6021	43.335	58.2886	73.2422
80.4	-26.8555	-17.7002	-10.6812	-4.88281	2.44141	11.2915	20.1416	29.6021	43.0298	58.2886	72.937
80.5	-26.5503	-18.0054	-11.2915	-4.27246	2.74658	11.2915	20.4468	29.2969	43.0298	57.9834	72.6318
80.6	-25.9399	-18.9209	-11.5967	-3.66211	3.05176	11.2915	20.752	29.2969	43.0298	57.9834	72.6318
80.7	-25.6348	-19.5312	-11.5967	-3.05176	3.05176	10.9863	20.752	29.6021	42.7246	58.2886	72.6318
80.8	-25.6348	-19.2261	-10.9863	-3.05176	3.35693	10.376	20.4468	29.6021	42.4194	58.5937	72.937
80.9	-25.6348	-18.3105	-10.9863	-3.05176	3.35693	10.376	20.1416	29.6021	41.8091	58.8989	73.2422
81	-24.7192	-17.395	-11.2915	-3.35693	2.74658	10.6812	19.8364	29.2969	41.5039	58.8989	73.5474
81.1	-24.1089	-16.7847	-11.9019	-3.66211	2.44141	10.6812	19.2261	29.2969	41.1987	58.8989	74.1577
81.2	-23.8037	-16.4795	-12.207	-3.66211	2.44141	10.6812	19.2261	29.6021	41.5039	58.8989	74.1577
81.3	-23.4985	-16.7847	-11.9019	-3.66211	3.05176	10.6812	18.9209	29.6021	42.1143	59.2041	74.1577
81.4	-23.4985	-17.0898	-11.2915	-3.66211	3.66211	10.6812	19.2261	29.9072	42.4194	59.2041	74.1577
81.5	-23.4985	-17.395	-10.9863	-3.66211	3.96729	10.376	19.5312	30.2124	42.7246	58.8989	73.2422
81.6	-23.8037	-18.0054	-10.6812	-3.66211	3.96729	10.376	19.8364	30.5176	42.4194	58.2886	72.6318
81.7	-24.1089	-18.3105	-10.9863	-3.66211	3.66211	10.0708	20.1416	31.1279	42.4194	57.373	72.3267
81.8	-24.4141	-18.0054	-11.5967	-3.96729	3.35693	10.0708	20.1416	30.8228	42.7246	56.4575	72.3267
81.9	-24.4141	-17.395	-11.2915	-3.96729	3.66211	10.0708	20.1416	30.5176	42.7246	55.8472	72.3267
82	-24.4141	-16.7847	-10.9863	-3.96729	3.66211	10.0708	20.4468	30.2124	42.7246	55.8472	72.0215
82.1	-24.7192	-16.7847	-10.376	-3.96729	3.35693	10.0708	20.1416	30.2124	42.4194	56.4575	72.3267
82.2	-25.3296	-17.0898	-9.76562	-3.96729	3.35693	10.0708	19.8364	29.9072	42.1143	56.7627	72.937
82.3	-26.2451	-17.395	-9.76562	-4.27246	3.05176	10.0708	19.5312	29.6021	41.8091	57.373	73.5474
82.4	-26.8555	-17.7002	-10.0708	-4.27246	3.05176	10.0708	19.8364	28.9917	41.5039	57.373	74.1577
82.5	-26.8555	-17.7002	-10.6812	-4.27246	3.35693	10.0708	19.8364	28.6865	41.5039	57.6782	74.1577
82.6	-26.2451	-17.7002	-11.2915	-3.96729	3.66211	10.0708	19.5312	28.3813	41.8091	57.6782	73.5474
82.7	-25.0244	-18.0054	-11.9019	-3.96729	3.66211	10.376	19.2261	28.3813	41.8091	57.6782	73.2422
82.8	-24.4141	-17.7002	-12.207	-3.66211	3.35693	10.376	18.9209	28.6865	41.1987	57.6782	72.937
82.9	-24.4141	-17.395	-11.9019	-3.35693	2.74658	10.6812	18.9209	28.9917	41.1987	57.9834	72.937
83	-24.1089	-17.0898	-11.5967	-3.05176	2.13623	10.6812	19.2261	29.2969	41.5039	58.5937	73.2422
83.1	-24.1089	-17.395	-11.2915	-3.05176	1.83105	10.6812	19.5312	29.6021	42.1143	58.8989	73.5474
83.2	-23.8037	-17.395	-10.9863	-2.74658	2.13623	10.376	19.8364	29.9072	42.4194	58.5937	73.8525
83.3	-23.4985	-17.395	-10.376	-2.74658	2.74658	10.376	19.8364	30.2124	43.0298	58.2886	74.1577
83.4	-23.8037	-17.0898	-10.0708	-3.05176	3.05176	10.6812	20.1416	30.2124	43.335	57.9834	74.4629
83.5	-24.1089	-17.0898	-9.46045	-3.35693	3.05176	10.6812	20.752	30.2124	43.6401	57.6782	74.1577
83.6	-24.4141	-17.0898	-9.15527	-3.35693	3.05176	10.6812	20.4468	30.2124	43.335	57.6782	74.1577
83.7	-24.1089	-17.395	-9.76562	-3.35693	3.05176	10.6812	20.1416	30.5176	43.0298	57.9834	73.8525
83.8	-23.8037	-17.395	-9.76562	-2.74658	3.35693	10.376	19.5312	30.8228	42.4194	58.2886	72.937
83.9	-23.4985	-17.0898	-9.76562	-2.44141	3.66211	9.76563	19.2261	30.5176	42.1143	58.5937	72.6318
84	-23.4985	-16.7847	-9.46045	-2.74658	3.66211	9.76563	18.9209	29.9072	42.4194	58.5937	72.0215
84.1	-23.4985	-16.7847	-9.15527	-3.05176	3.05176	10.0708	18.9209	29.6021	42.4194	57.9834	72.0215
84.2	-23.8037	-16.7847	-9.15527	-3.66211	2.74658	10.6812	18.9209	29.2969	42.4194	57.9834	72.6318
84.3	-24.1089	-17.0898	-9.46045	-3.96729	2.44141	11.2915	19.2261	28.6865	42.7246	57.9834	73.2422
84.4	-24.4141	-17.7002	-9.46045	-4.57764	1.83105	11.9019	18.9209	28.0762	43.0298	57.9834	73.8525
84.5	-24.7192	-17.7002	-9.46045	-4.57764	1.83105	12.207	18.9209	28.0762	43.0298	57.6782	74.1577
84.6	-24.7192	-17.395	-9.76562	-4.27246	1.83105	11.9019	19.2261	28.3813	42.4194	57.373	74.4629
84.7	-24.7192	-17.395	-10.0708	-3.66211	2.44141	11.2915	20.1416	28.9917	41.8091	57.0679	74.7681
84.8	-24.4141	-17.395	-10.6812	-3.05176	3.05176	10.376	20.752	29.2969	41.1987	57.0679	74.7681
84.9	-24.1089	-17.7002	-11.2915	-3.35693	3.35693	10.376	21.0571	29.6021	41.1987	57.6782	74.4629
85	-24.1089	-18.0054	-11.2915	-3.66211	3.35693	10.376	21.0571	29.9072	41.1987	57.9834	74.1577
85.1	-24.1089	-17.7002	-11.5967	-4.27246	3.66211	10.6812	20.752	29.9072	41.1987	57.9834	73.5474
85.2	-24.1089	-16.7847	-11.5967	-4.57764	4.27246	10.6812	20.1416	30.2124	41.5039	57.6782	72.937
85.3	-24.1089	-16.4795	-10.9863	-4.27246	4.57764	10.6812	20.1416	30.5176	41.8091	57.0679	72.6318
85.4	-24.1089	-15.8691	-10.6812	-3.96729	4.88281	10.6812	19.5312	30.2124	42.4194	56.4575	72.0215
85.5	-24.4141	-15.2588	-10.6812	-3.96729	4.88281	10.6812	19.5312	29.9072	42.7246	56.1523	72.0215
85.6	-24.1089	-15.564	-10.9863	-3.66211	3.96729	10.6812	19.8364	29.6021	42.7246	55.542	71.7163
85.7	-24.1089	-16.1743	-10.6812	-3.66211	3.05176	10.9863	20.1416	29.2969	43.0298	55.8472	71.7163
85.8	-23.8037	-17.0898	-10.376	-3.66211	2.44141	10.9863	20.1416	29.2969	43.335	56.1523	72.0215
85.9	-23.4985	-17.0898	-10.0708	-3.35693	2.44141	10.9863	19.8364	29.2969	43.6401	56.4575	72.3267
86	-23.4985	-16.7847	-9.76562	-3.05176	2.44141	10.9863	19.2261	29.2969	43.0298	56.7627	72.6318
86.1	-23.1934	-16.4795	-9.76562	-2.74658	2.74658	11.2915	18.9209	29.2969	42.4194	56.7627	72.937
86.2	-23.1934	-16.4795	-9.46045	-2.74658	2.74658	11.5967	18.9209	29.2969	41.8091	57.0679	72.6318
86.3	-23.4985	-16.7847	-9.46045	-2.44141	2.74658	11.9019	18.9209	29.2969	41.8091	57.0679	72.3267
86.4	-23.4985	-16.7847	-9.76562	-2.44141	2.74658	11.2915	19.2261	28.9917	41.8091	57.0679	72.3267
86.5	-23.8037	-17.0898	-10.0708	-2.13623	2.74658	10.376	19.5312	28.9917	42.1143	57.373	72.6318
86.6	-24.1089	-17.395	-10.376	-2.13623	2.74658	9.76563	19.8364	28.9917	42.1143	57.6782	72.937
86.7	-24.1089	-17.0898	-10.0708	-2.74658	3.05176	9.46045	19.5312	28.9917	42.4194	57.6782	72.937
86.8	-24.1089	-16.7847	-9.76562	-2.74658	3.35693	9.46045	19.2261	29.2969	43.0298	57.373	73.2422
86.9	-23.8037	-16.1743	-9.15527	-2.74658	3.35693	9.76563	18.9209	29.9072	42.7246	57.373	73.5474
87	-23.4985	-15.8691	-9.15527	-3.05176	3.05176	10.0708	18.9209	30.2124	42.4194	57.6782	73.8525
87.1	-23.1934	-15.8691	-9.15527	-3.35693	3.05176	10.376	19.2261	30.2124	42.1143	57.373	74.1577
87.2	-23.1934	-16.1743	-9.76562	-4.27246	3.35693	10.376	19.5312	29.6021	42.1143	57.373	74.4629
87.3	-23.4985	-16.1743	-10.376	-4.88281	3.35693	10.376	19.5312	28.6865	42.4194	57.0679	74.7681
87.4	-23.8037	-15.8691	-10.6812	-4.57764	3.05176	10.0708	19.5312	28.6865	42.4194	56.4575	74.7681
87.5	-23.8037	-15.8691	-10.376	-4.27246	2.74658	10.0708	19.5312	28.6865	42.1143	55.8472	75.3784
87.6	-23.8037	-16.1743	-9.76562	-3.66211	2.74658	10.376	19.8364	28.6865	42.4194	55.8472	75.3784
87.7	-23.8037	-16.7847	-9.15527	-3.35693	2.74658	10.6812	20.1416	29.2969	42.7246	56.4575	74.7681
87.8	-23.4985	-17.0898	-9.46045	-3.35693	3.05176	11.2915	20.1416	29.9072	43.6401	56.7627	74.4629
87.9	-23.4985	-17.0898	-10.0708	-3.35693	2.74658	11.2915	20.752	30.8228	43.6401	56.7627	73.8525
88	-23.1934	-17.0898	-10.0708	-3.35693	2.44141	10.9863	21.0571	30.8228	43.335	56.7627	73.5474
88.1	-23.4985	-17.0898	-10.0708	-3.35693	2.44141	10.6812	21.3623	30.2124	43.335	56.4575	73.5474
88.2	-23.4985	-17.0898	-10.0708	-3.35693	2.74658	10.6812	20.752	29.6021	43.335	56.1523	73.2422
88.3	-23.8037	-16.4795	-10.376	-3.35693	3.66211	10.376	19.8364	29.2969	43.335	55.542	73.2422
88.4	-23.8037	-16.1743	-10.6812	-3.35693	4.27246	10.0708	19.2261	29.6021	43.0298	55.2368	73.2422
88.5	-23.8037	-16.1743	-10.9863	-2.74658	4.27246	10.0708	18.6157	29.6021	42.7246	55.8472	73.2422
88.6	-23.8037	-16.7847	-10.376	-2.44141	3.96729	10.0708	18.6157	29.6021	42.7246	56.7627	73.2422
88.7	-23.4985	-17.0898	-9.46045	-3.05176	3.66211	10.0708	18.9209	29.2969	42.7246	57.373	73.2422
88.8	-22.8882	-16.4795	-8.54492	-3.66211	3.35693	10.0708	19.2261	28.9917	42.4194	57.0679	73.8525
88.9	-22.2778	-15.2588	-8.8501	-3.96729	2.74658	10.6812	19.2261	28.9917	42.1143	56.4575	73.8525
89	-21.9727	-15.2588	-9.15527	-3.96729	2.44141	10.6812	19.2261	28.9917	42.1143	55.542	73.8525
89.1	-22.2778	-15.8691	-9.76562	-3.96729	2.44141	10.6812	19.5312	28.6865	42.4194	55.2368	73.8525
89.2	-22.8882	-16.7847	-9.76562	-3.96729	2.44141	10.6812	19.8364	28.6865	42.4194	55.542	73.5474
89.3	-23.1934	-17.0898	-9.76562	-3.96729	2.44141	10.376	19.8364	28.3813	42.1143	55.8472	73.5474
89.4	-23.4985	-17.395	-9.76562	-3.96729	2.74658	10.6812	19.8364	28.3813	42.1143	56.1523	73.2422
89.5	-23.1934	-17.7002	-9.46045	-3.66211	3.05176	10.6812	19.8364	28.6865	42.1143	56.1523	72.937
89.6	-22.583	-17.7002	-9.46045	-3.66211	3.66211	10.6812	19.5312	28.6865	42.4194	55.8472	72.6318
89.7	-22.2778	-17.7002	-9.46045	-3.96729	3.96729	10.376	19.2261	28.6865	42.1143	56.1523	72.6318
89.8	-22.583	-17.7002	-9.76562	-4.27246	3.96729	10.376	18.3105	28.6865	41.8091	56.4575	72.937
89.9	-22.8882	-17.7002	-9.46045	-4.27246	3.66211	10.0708	18.0054	28.9917	41.8091	56.7627	73.5474
90	-22.8882	-17.395	-9.46045	-3.66211	2.74658	10.0708	17.7002	28.9917	42.1143	56.7627	73.8525
90.1	-23.4985	-17.395	-9.46045	-3.05176	2.44141	9.76563	18.0054	29.2969	42.4194	56.7627	73.8525
90.2	-23.8037	-17.7002	-9.76562	-2.74658	2.44141	10.0708	18.6157	28.9917	42.1143	56.4575	73.5474
90.3	-23.8037	-17.0898	-9.76562	-3.05176	2.44141	10.376	19.5312	28.9917	41.8091	56.4575	73.5474
90.4	-23.8037	-15.8691	-9.76562	-3.35693	2.44141	10.9863	19.8364	29.2969	41.5039	56.7627	73.8525
90.5	-23.4985	-14.9536	-10.0708	-3.66211	2.74658	11.2915	20.4468	29.2969	41.1987	56.7627	73.8525
90.6	-23.1934	-14.6484	-10.0708	-3.35693	3.35693	11.2915	20.4468	29.2969	41.1987	56.7627	74.1577
90.7	-22.8882	-14.9536	-10.0708	-3.05176	3.96729	10.6812	20.4468	29.2969	41.1987	56.4575	74.7681
90.8	-22.583	-15.564	-10.0708	-3.05176	3.66211	10.376	19.8364	29.2969	41.5039	56.1523	75.0732
90.9	-22.2778	-16.1743	-10.0708	-2.74658	3.66211	10.376	18.9209	29.2969	41.8091	55.8472	75.0732
91	-22.2778	-16.4795	-10.0708	-2.74658	3.05176	10.6812	18.9209	29.2969	41.8091	56.1523	75.3784
91.1	-22.583	-16.7847	-10.0708	-3.05176	2.74658	10.6812	19.2261	28.9917	41.8091	56.4575	75.3784
91.2	-23.1934	-17.395	-10.0708	-3.35693	2.44141	10.6812	20.1416	28.6865	41.8091	56.7627	75.3784
91.3	-23.4985	-17.7002	-10.0708	-3.35693	1.83105	10.9863	20.752	28.3813	41.8091	56.7627	75.6836
91.4	-23.4985	-18.0054	-9.76562	-3.05176	2.13623	10.9863	21.0571	28.6865	41.5039	56.4575	75.6836
91.5	-23.4985	-17.7002	-9.76562	-3.05176	2.74658	11.5967	21.0571	28.9917	41.5039	56.1523	75.6836
91.6	-22.8882	-17.7002	-9.76562	-3.35693	3.35693	11.5967	20.4468	29.6021	41.1987	56.4575	75.6836
91.7	-22.8882	-17.395	-10.0708	-3.66211	3.66211	11.2915	20.1416	29.9072	41.1987	56.7627	75.6836
91.8	-23.1934	-17.395	-10.0708	-3.66211	3.66211	10.6812	19.8364	30.2124	40.8936	57.0679	75.6836
91.9	-22.8882	-17.395	-9.76562	-3.35693	3.66211	10.0708	19.2261	30.5176	40.8936	57.0679	75.3784
92	-22.2778	-16.7847	-9.76562	-3.05176	3.35693	9.46045	18.9209	30.5176	40.8936	57.0679	75.3784
92.1	-21.3623	-16.4795	-9.76562	-3.05176	3.35693	9.15527	18.3105	29.9072	41.1987	56.7627	75.3784
92.2	-20.752	-15.8691	-9.76562	-3.05176	3.35693	9.15527	18.0054	28.9917	42.1143	56.4575	75.0732
92.3	-20.4468	-15.2588	-9.76562	-3.05176	3.05176	9.46045	18.0054	28.0762	43.0298	56.7627	74.4629
92.4	-20.752	-15.2588	-9.46045	-3.05176	2.74658	9.46045	18.6157	28.0762	43.6401	57.373	73.8525
92.5	-21.9727	-15.564	-9.76562	-3.05176	2.44141	10.0708	18.9209	28.3813	43.6401	57.6782	73.2422
92.6	-23.1934	-15.564	-10.0708	-3.05176	2.44141	10.376	18.6157	28.3813	43.335	57.9834	73.2422
92.7	-23.8037	-15.8691	-10.376	-3.35693	2.74658	10.6812	18.6157	28.3813	43.0298	57.373	73.2422
92.8	-24.1089	-16.4795	-10.376	-3.66211	2.44141	10.6812	18.9209	28.3813	42.7246	56.7627	72.937
92.9	-24.7192	-16.7847	-10.376	-3.66211	2.13623	10.6812	19.2261	28.6865	42.4194	56.1523	72.3267
93	-24.7192	-17.0898	-10.0708	-3.66211	2.13623	10.6812	19.2261	28.6865	42.4194	55.542	72.0215
93.1	-24.4141	-16.7847	-10.0708	-3.66211	2.74658	10.376	18.9209	28.9917	42.4194	54.9316	71.7163
93.2	-24.1089	-16.7847	-10.0708	-3.66211	3.35693	10.376	18.9209	29.2969	42.7246	54.9316	72.0215
93.3	-23.4985	-16.7847	-10.0708	-3.66211	3.66211	10.6812	18.9209	29.6021	43.0298	55.2368	72.0215
93.4	-22.8882	-16.7847	-9.76562	-3.66211	3.66211	10.9863	18.6157	29.9072	42.4194	55.8472	72.0215
93.5	-22.583	-16.7847	-9.46045	-3.35693	3.35693	11.5967	18.3105	30.2124	41.8091	56.4575	72.0215
93.6	-21.9727	-16.4795	-9.15527	-3.05176	3.35693	11.5967	18.0054	29.9072	41.1987	57.0679	72.0215
93.7	-21.9727	-16.4795	-9.15527	-3.05176	3.35693	10.9863	18.0054	29.9072	41.1987	57.373	72.3267
93.8	-21.9727	-16.1743	-9.15527	-3.66211	3.35693	10.0708	18.3105	29.2969	41.5039	57.0679	73.2422
93.9	-21.9727	-15.564	-8.8501	-3.96729	3.05176	9.46045	18.6157	28.6865	42.1143	57.0679	73.8525
94	-22.2778	-15.2588	-8.54492	-4.27246	2.44141	8.8501	18.6157	28.3813	42.7246	57.0679	74.1577
94.1	-22.2778	-14.9536	-8.8501	-3.96729	2.13623	8.8501	18.9209	28.6865	43.0298	57.0679	74.1577
94.2	-22.2778	-14.9536	-9.46045	-3.05176	2.44141	9.15527	19.2261	29.2969	43.0298	56.7627	73.5474
94.3	-22.2778	-15.2588	-9.76562	-2.44141	3.05176	9.15527	19.8364	29.6021	43.335	55.8472	73.2422
94.4	-22.2778	-15.564	-10.0708	-2.13623	3.66211	9.46045	20.1416	29.6021	43.0298	55.2368	72.937
94.5	-22.583	-15.2588	-10.376	-2.44141	3.96729	9.46045	20.1416	29.6021	42.7246	55.2368	72.937
94.6	-22.583	-15.564	-10.376	-3.05176	3.66211	10.0708	19.8364	29.6021	42.4194	55.542	72.937
94.7	-22.8882	-15.8691	-10.6812	-3.66211	3.66211	10.376	19.5312	29.6021	42.1143	55.542	72.3267
94.8	-23.1934	-16.4795	-10.6812	-4.27246	3.35693	10.9863	19.5312	29.9072	41.5039	55.2368	72.0215
94.9	-22.583	-16.7847	-10.376	-4.57764	3.35693	11.2915	19.2261	29.9072	40.8936	55.2368	71.7163
95	-22.583	-16.7847	-9.76562	-4.57764	3.05176	11.2915	18.9209	29.9072	40.2832	55.542	72.0215
95.1	-22.2778	-16.7847	-9.46045	-4.27246	2.74658	11.2915	18.3105	29.2969	40.2832	56.1523	72.6318
95.2	-22.2778	-17.0898	-9.15527	-3.66211	2.74658	11.2915	18.6157	28.9917	40.5884	56.4575	72.6318
95.3	-21.9727	-17.395	-9.46045	-3.05176	3.05176	11.2915	19.2261	28.6865	41.1987	56.1523	73.2422
95.4	-21.6675	-17.395	-9.46045	-3.35693	3.05176	10.9863	19.5312	29.2969	41.5039	55.8472	73.5474
95.5	-21.6675	-17.395	-9.46045	-3.66211	3.05176	10.9863	19.5312	29.6021	41.1987	56.1523	73.5474
95.6	-21.6675	-16.7847	-9.76562	-3.66211	2.74658	11.2915	19.5312	29.6021	40.5884	56.4575	73.5474
95.7	-22.2778	-16.1743	-9.76562	-3.66211	3.05176	11.2915	19.2261	29.2969	40.2832	56.7627	73.2422
95.8	-22.583	-15.564	-9.76562	-3.35693	3.05176	10.9863	19.2261	29.2969	40.2832	57.0679	73.2422
95.9	-22.8882	-14.9536	-10.0708	-3.35693	3.05176	10.376	19.5312	29.2969	40.5884	57.0679	72.937
96	-22.2778	-14.6484	-10.0708	-3.05176	3.05176	9.76563	19.5312	29.2969	41.1987	57.0679	72.3267
96.1	-21.9727	-14.3433	-9.76562	-2.74658	2.74658	9.46045	19.8364	28.9917	41.5039	57.0679	71.4111
96.2	-21.6675	-14.0381	-9.15527	-2.44141	3.05176	9.46045	19.5312	28.6865	41.8091	56.7627	70.8008
96.3	-21.6675	-14.6484	-8.8501	-2.13623	3.05176	9.46045	18.9209	28.9917	41.1987	56.7627	70.8008
96.4	-21.3623	-15.2588	-8.8501	-2.44141	3.35693	9.76563	18.6157	28.6865	41.1987	57.0679	71.106
96.5	-21.3623	-15.564	-9.15527	-2.44141	3.35693	9.46045	18.3105	28.0762	41.5039	57.0679	71.4111
96.6	-21.3623	-15.564	-9.46045	-2.44141	3.35693	9.46045	17.395	28.0762	41.8091	57.0679	71.4111
96.7	-21.3623	-15.564	-9.46045	-2.74658	3.35693	9.46045	17.395	28.0762	42.4194	57.0679	71.4111
96.8	-21.6675	-15.564	-8.54492	-2.74658	3.05176	9.46045	17.7002	28.3813	42.7246	57.0679	71.7163
96.9	-22.2778	-15.8691	-7.93457	-2.74658	2.13623	10.0708	18.6157	28.6865	42.7246	56.7627	72.3267
97	-22.8882	-15.8691	-8.23975	-3.35693	2.13623	10.6812	18.9209	28.9917	42.7246	56.4575	72.937
97.1	-23.8037	-16.1743	-9.15527	-3.66211	2.74658	10.6812	19.2261	29.6021	42.1143	56.1523	73.2422
97.2	-24.1089	-16.1743	-10.376	-3.35693	3.66211	10.6812	19.8364	30.2124	41.1987	55.8472	72.937
97.3	-23.8037	-16.1743	-10.9863	-3.35693	4.27246	10.376	20.4468	30.5176	41.1987	55.8472	72.3267
97.4	-23.8037	-16.1743	-10.6812	-3.66211	4.27246	10.6812	21.0571	30.5176	41.8091	56.1523	71.4111
97.5	-23.8037	-16.1743	-9.76562	-3.96729	3.96729	10.9863	21.0571	30.2124	42.4194	56.4575	70.8008
97.6	-22.8882	-15.8691	-8.8501	-3.66211	3.66211	10.9863	20.752	29.9072	42.7246	56.7627	71.4111
97.7	-21.9727	-15.8691	-8.54492	-3.35693	3.66211	10.9863	20.4468	29.9072	42.4194	57.0679	72.3267
97.8	-21.0571	-16.1743	-8.54492	-3.05176	3.35693	10.9863	20.1416	30.2124	42.1143	57.0679	72.6318
97.9	-20.752	-15.8691	-8.8501	-3.05176	2.74658	10.6812	19.8364	29.9072	41.8091	57.0679	72.6318
98	-20.4468	-15.564	-8.8501	-3.66211	2.44141	10.6812	19.5312	29.2969	41.8091	57.0679	72.3267
98.1	-20.1416	-14.9536	-8.8501	-3.66211	2.44141	10.6812	19.5312	28.9917	41.5039	57.0679	72.0215
98.2	-20.4468	-14.6484	-9.15527	-3.35693	2.74658	10.376	19.8364	28.6865	42.1143	57.0679	72.0215
98.3	-21.0571	-14.6484	-9.46045	-2.74658	2.74658	10.0708	19.8364	28.6865	42.4194	56.7627	72.0215
98.4	-21.6675	-14.9536	-9.76562	-2.44141	3.05176	9.76563	19.8364	28.6865	42.4194	56.4575	72.0215
98.5	-21.9727	-14.9536	-10.0708	-2.13623	3.05176	9.76563	19.5312	28.6865	42.4194	56.7627	72.0215
98.6	-21.6675	-14.6484	-10.0708	-2.44141	3.05176	9.76563	19.2261	28.9917	41.8091	56.7627	71.7163
98.7	-21.6675	-14.3433	-10.0708	-2.74658	3.05176	10.0708	18.9209	29.2969	41.8091	56.7627	71.7163
98.8	-21.9727	-14.6484	-9.76562	-2.74658	3.05176	10.376	18.9209	29.6021	41.8091	56.7627	71.7163
98.9	-22.2778	-15.2588	-8.8501	-2.74658	3.35693	10.6812	18.9209	29.6021	41.8091	56.7627	71.7163
99	-22.583	-15.2588	-8.23975	-2.74658	3.35693	10.6812	18.9209	29.9072	41.8091	56.7627	72.3267
99.1	-22.583	-14.9536	-7.93457	-3.05176	3.35693	10.376	18.9209	30.2124	41.1987	56.7627	72.6318
99.2	-22.2778	-14.6484	-8.23975	-3.35693	3.66211	10.0708	18.9209	30.8228	40.5884	56.7627	72.6318
99.3	-21.3623	-14.9536	-8.23975	-3.05176	3.96729	10.0708	18.9209	30.8228	40.2832	56.4575	72.3267
99.4	-21.0571	-14.9536	-8.54492	-2.74658	3.96729	10.376	19.2261	30.8228	40.8936	56.4575	72.6318
99.5	-21.3623	-14.9536	-8.54492	-2.44141	3.35693	10.6812	19.8364	30.2124	41.5039	56.7627	72.937
99.6	-21.9727	-15.2588	-8.8501	-2.74658	2.74658	11.2915	19.8364	29.9072	42.1143	56.7627	73.2422
99.7	-22.583	-15.8691	-9.15527	-3.35693	2.13623	11.5967	19.5312	29.2969	42.1143	56.7627	73.2422
99.8	-22.583	-16.1743	-9.15527	-3.96729	1.83105	11.5967	18.9209	29.2969	42.1143	56.7627	72.937
99.9	-22.583	-16.1743	-9.15527	-3.96729	1.83105	11.5967	18.0054	29.6021	42.1143	57.373	73.2422
100	-22.583	-15.564	-8.8501	-3.96729	2.13623	11.5967	18.0054	30.2124	42.1143	57.6782	73.2422
100.1	-22.583	-14.9536	-8.8501	-3.66211	2.13623	11.2915	18.6157	30.2124	42.1143	57.9834	73.5474
100.2	-22.583	-14.6484	-9.15527	-3.35693	2.13623	10.6812	19.2261	29.9072	42.4194	57.9834	73.8525
100.3	-22.583	-14.6484	-9.46045	-2.74658	2.44141	9.76563	19.8364	29.6021	42.1143	57.6782	74.4629
100.4	-22.583	-14.9536	-9.15527	-2.13623	2.74658	9.15527	20.1416	29.2969	41.8091	57.373	74.7681
100.5	-22.2778	-14.6484	-9.15527	-1.83105	3.35693	8.8501	20.1416	28.9917	41.8091	57.0679	74.4629
100.6	-21.9727	-14.3433	-9.15527	-1.83105	3.66211	9.15527	20.1416	28.6865	41.5039	57.0679	73.5474
100.7	-22.2778	-14.0381	-9.46045	-1.83105	4.27246	9.76563	19.8364	28.6865	41.8091	56.7627	72.937
100.8	-22.583	-14.3433	-9.46045	-1.83105	4.57764	10.0708	19.8364	28.9917	42.1143	56.7627	72.6318
100.9	-22.2778	-14.6484	-9.76562	-1.83105	4.57764	10.6812	19.2261	29.2969	42.7246	56.4575	72.3267
101	-21.6675	-15.2588	-9.76562	-1.83105	4.27246	10.9863	18.9209	29.9072	43.0298	56.4575	72.6318
101.1	-20.4468	-15.8691	-9.46045	-2.44141	3.96729	10.9863	18.6157	29.9072	43.335	56.1523	72.6318
101.2	-19.8364	-16.7847	-9.15527	-2.74658	3.35693	10.9863	18.6157	30.5176	43.335	55.542	72.6318
101.3	-19.8364	-17.0898	-8.8501	-3.35693	3.35693	10.9863	18.9209	30.5176	43.335	55.2368	72.937
101.4	-20.1416	-16.4795	-8.54492	-3.66211	3.35693	10.9863	19.2261	29.9072	43.6401	55.2368	73.2422
101.5	-20.4468	-15.2588	-8.23975	-3.66211	3.35693	10.6812	19.2261	28.9917	43.335	55.542	73.8525
101.6	-21.0571	-14.3433	-8.23975	-3.66211	3.66211	10.376	19.2261	28.6865	43.0298	56.1523	74.1577
101.7	-21.0571	-13.7329	-8.54492	-3.35693	3.96729	9.76563	19.2261	28.9917	42.7246	56.7627	73.8525
101.8	-21.3623	-13.4277	-8.54492	-3.35693	3.66211	9.46045	18.9209	29.6021	42.1143	57.373	73.5474
101.9	-21.6675	-13.7329	-8.8501	-3.05176	3.35693	9.76563	18.9209	29.9072	41.5039	57.9834	73.2422
102	-22.2778	-14.0381	-9.15527	-3.35693	3.05176	10.376	19.2261	29.6021	40.8936	58.2886	73.2422
102.1	-22.583	-14.3433	-9.15527	-3.35693	3.35693	11.2915	19.5312	29.2969	40.5884	57.9834	73.5474
102.2	-22.2778	-14.6484	-8.8501	-3.05176	3.66211	11.5967	19.2261	29.6021	40.5884	57.373	73.8525
102.3	-21.6675	-14.9536	-8.23975	-2.74658	3.66211	12.207	18.9209	29.2969	41.1987	56.7627	73.8525
102.4	-20.752	-15.2588	-8.23975	-2.44141	3.35693	12.207	18.9209	28.9917	41.8091	56.4575	73.2422
102.5	-20.752	-15.564	-8.23975	-2.13623	2.44141	11.9019	19.2261	28.6865	42.7246	56.1523	72.6318
102.6	-21.3623	-15.2588	-8.8501	-1.83105	2.13623	11.5967	19.8364	28.6865	43.335	55.8472	72.6318
102.7	-21.6675	-14.9536	-9.76562	-1.52588	2.13623	11.2915	19.8364	28.6865	43.335	55.8472	72.6318
102.8	-21.9727	-15.2588	-10.376	-1.83105	2.44141	10.9863	19.8364	28.6865	42.7246	56.4575	72.6318
102.9	-21.9727	-15.564	-10.376	-2.13623	3.05176	10.6812	19.8364	28.9917	42.4194	56.7627	72.937
103	-21.9727	-15.2588	-9.76562	-2.44141	3.66211	10.6812	19.5312	29.2969	42.1143	56.7627	73.2422
103.1	-21.6675	-14.9536	-9.15527	-2.74658	3.96729	10.6812	19.2261	29.6021	41.8091	56.4575	73.5474
103.2	-21.3623	-15.2588	-8.54492	-3.05176	3.96729	10.9863	18.9209	29.9072	41.8091	56.4575	73.2422
103.3	-21.3623	-14.9536	-8.23975	-3.35693	4.27246	10.9863	18.9209	29.9072	42.1143	55.8472	72.6318
103.4	-21.3623	-14.3433	-8.23975	-3.35693	4.27246	10.6812	18.6157	29.6021	42.4194	55.2368	72.0215
103.5	-21.0571	-13.4277	-8.54492	-3.05176	3.66211	9.76563	18.3105	29.6021	42.4194	54.9316	72.0215
103.6	-20.4468	-12.8174	-8.8501	-2.44141	3.35693	8.8501	18.3105	29.2969	42.4194	54.6265	72.3267
103.7	-20.4468	-12.8174	-9.46045	-2.13623	2.74658	8.8501	18.9209	28.9917	42.4194	55.2368	72.6318
103.8	-20.4468	-13.4277	-10.0708	-2.44141	2.13623	9.46045	19.5312	28.9917	42.4194	55.8472	72.6318
103.9	-20.4468	-13.7329	-10.0708	-3.05176	2.13623	10.6812	19.8364	28.6865	43.0298	56.1523	73.2422
104	-20.752	-14.3433	-9.76562	-3.05176	2.44141	10.9863	19.8364	28.3813	43.0298	56.4575	73.5474
104.1	-20.752	-14.6484	-9.46045	-3.05176	2.74658	11.2915	20.1416	28.3813	43.0298	56.7627	74.1577
104.2	-21.0571	-14.3433	-9.15527	-3.05176	3.05176	11.2915	20.4468	28.6865	42.7246	57.0679	74.4629
104.3	-20.752	-14.6484	-8.8501	-3.05176	3.66211	10.6812	20.4468	28.9917	43.0298	57.9834	73.5474
104.4	-20.752	-14.9536	-8.54492	-2.74658	4.27246	10.376	20.4468	28.9917	43.335	58.2886	72.937
104.5	-20.4468	-14.9536	-8.54492	-2.44141	4.57764	10.376	20.4468	28.6865	43.335	57.9834	72.937
104.6	-20.752	-15.2588	-8.54492	-2.13623	4.88281	10.376	20.752	28.9917	42.7246	57.6782	73.5474
104.7	-21.6675	-15.2588	-8.23975	-2.44141	4.88281	10.6812	21.3623	28.9917	42.4194	57.0679	73.8525
104.8	-21.9727	-14.6484	-7.62939	-2.74658	4.27246	10.9863	21.0571	28.6865	42.1143	57.0679	73.8525
104.9	-21.9727	-14.0381	-7.62939	-3.05176	3.66211	11.2915	19.8364	28.3813	41.8091	56.4575	73.8525
105	-21.6675	-13.7329	-7.93457	-3.66211	3.35693	10.9863	18.6157	28.3813	41.5039	56.1523	73.8525
105.1	-21.3623	-13.4277	-8.54492	-3.66211	3.66211	10.6812	18.0054	28.6865	41.5039	55.8472	74.1577
105.2	-21.0571	-13.4277	-8.8501	-3.05176	3.35693	10.6812	18.0054	28.9917	41.5039	55.542	74.4629
105.3	-21.0571	-13.4277	-8.54492	-2.74658	2.74658	10.9863	18.3105	28.9917	40.8936	55.8472	75.0732
105.4	-21.0571	-13.1226	-8.54492	-2.44141	2.44141	10.9863	18.6157	28.6865	40.5884	55.8472	75.0732
105.5	-21.0571	-13.1226	-8.54492	-2.13623	2.44141	10.6812	18.6157	28.3813	40.5884	56.4575	74.7681
105.6	-20.4468	-13.7329	-8.8501	-2.13623	2.74658	10.6812	18.6157	28.6865	40.5884	56.4575	74.1577
105.7	-20.1416	-14.9536	-9.15527	-2.13623	2.74658	10.6812	18.6157	29.2969	41.1987	56.1523	73.8525
105.8	-20.4468	-15.8691	-9.46045	-2.44141	2.44141	10.6812	18.3105	29.9072	42.1143	55.2368	74.1577
105.9	-20.752	-16.1743	-9.76562	-3.05176	2.44141	10.376	18.6157	30.2124	43.0298	54.6265	74.1577
106	-21.0571	-16.1743	-9.76562	-3.35693	2.44141	10.6812	18.6157	30.5176	43.335	54.3213	74.1577
106.1	-21.0571	-16.1743	-9.46045	-3.35693	2.44141	10.9863	18.9209	30.5176	43.6401	54.3213	73.8525
106.2	-21.0571	-16.1743	-9.15527	-3.05176	2.74658	11.5967	19.2261	30.5176	43.335	54.6265	73.8525
106.3	-21.0571	-16.1743	-8.54492	-3.05176	3.05176	11.5967	19.5312	30.2124	42.7246	54.9316	73.5474
106.4	-21.0571	-15.8691	-8.54492	-3.05176	3.05176	11.5967	20.1416	29.6021	41.8091	55.542	73.8525
106.5	-21.0571	-15.2588	-8.54492	-3.35693	2.74658	11.2915	20.1416	29.2969	40.8936	56.7627	73.8525
106.6	-21.0571	-14.9536	-8.54492	-3.66211	2.74658	10.9863	19.5312	28.6865	40.5884	57.373	73.5474
106.7	-21.0571	-15.2588	-8.54492	-3.96729	2.74658	10.9863	18.9209	28.6865	40.5884	57.373	73.2422
106.8	-20.752	-15.8691	-8.23975	-3.96729	3.35693	10.6812	18.9209	28.6865	40.8936	56.4575	72.937
106.9	-20.4468	-15.8691	-8.23975	-3.35693	3.96729	10.376	19.2261	28.9917	41.1987	55.8472	73.2422
107	-20.752	-15.564	-8.23975	-3.05176	4.27246	10.0708	19.2261	29.2969	41.1987	55.542	74.1577
107.1	-20.752	-14.9536	-8.54492	-3.05176	4.57764	9.76563	18.9209	29.6021	41.1987	55.2368	74.7681
107.2	-21.0571	-14.3433	-9.15527	-3.35693	4.57764	10.0708	18.6157	29.9072	41.1987	55.542	74.7681
107.3	-21.0571	-14.6484	-9.46045	-3.35693	4.27246	10.376	18.3105	29.9072	41.1987	55.8472	74.7681
107.4	-21.0571	-14.9536	-9.76562	-2.74658	3.96729	10.376	18.3105	29.6021	41.5039	56.1523	74.4629
107.5	-20.752	-14.9536	-9.76562	-2.44141	3.66211	10.376	18.6157	28.9917	41.8091	56.1523	73.8525
107.6	-20.752	-14.6484	-9.46045	-2.44141	3.35693	10.0708	19.2261	28.9917	42.4194	56.1523	73.2422
107.7	-20.4468	-14.0381	-9.15527	-2.44141	3.35693	9.76563	20.1416	28.9917	42.4194	56.4575	72.6318
107.8	-20.1416	-13.7329	-8.8501	-2.44141	3.35693	10.0708	20.4468	28.9917	42.4194	56.7627	72.937
107.9	-20.4468	-14.0381	-8.8501	-2.44141	3.66211	10.376	20.4468	28.9917	42.4194	56.7627	73.5474
108	-20.752	-14.6484	-8.8501	-2.44141	3.96729	10.6812	19.8364	28.6865	42.1143	56.7627	74.4629
108.1	-21.0571	-14.9536	-8.8501	-2.44141	3.96729	10.9863	19.5312	28.3813	42.4194	56.7627	74.7681
108.2	-21.0571	-14.3433	-8.8501	-2.13623	3.66211	11.2915	19.2261	28.0762	42.7246	56.7627	74.4629
108.3	-20.752	-14.0381	-8.54492	-2.13623	3.96729	11.2915	19.2261	28.3813	42.7246	56.7627	73.8525
108.4	-20.4468	-13.4277	-8.23975	-2.13623	3.66211	10.9863	18.9209	28.9917	42.7246	56.1523	73.5474
108.5	-20.4468	-13.1226	-7.93457	-2.13623	3.66211	10.376	18.9209	29.2969	42.4194	55.8472	73.8525
108.6	-20.4468	-13.1226	-7.62939	-2.13623	3.96729	9.76563	18.9209	29.6021	42.4194	55.542	74.4629
108.7	-20.752	-13.1226	-7.93457	-2.44141	4.27246	9.15527	19.5312	29.6021	42.1143	54.9316	74.7681
108.8	-21.0571	-13.7329	-8.54492	-2.74658	4.57764	8.8501	19.8364	28.9917	41.8091	54.3213	75.3784
108.9	-21.0571	-14.6484	-9.46045	-3.35693	4.27246	9.15527	20.1416	28.3813	41.8091	54.0161	75.3784
109	-21.0571	-15.564	-9.76562	-3.35693	3.96729	9.76563	20.1416	28.0762	42.1143	54.0161	75.0732
109.1	-20.752	-15.8691	-10.0708	-3.35693	3.35693	10.376	19.5312	28.6865	42.1143	54.6265	74.1577
109.2	-20.4468	-16.1743	-9.46045	-3.35693	2.74658	10.376	18.6157	29.2969	42.1143	55.542	72.937
109.3	-20.4468	-16.1743	-8.8501	-3.35693	2.44141	10.376	18.3105	29.9072	41.8091	55.8472	72.6318
109.4	-20.4468	-15.8691	-8.23975	-3.05176	2.44141	10.6812	18.6157	30.2124	41.5039	55.8472	72.937
109.5	-20.752	-15.2588	-8.23975	-3.05176	2.44141	10.376	19.2261	29.9072	41.5039	55.8472	73.2422
109.6	-21.0571	-14.3433	-8.54492	-2.74658	2.44141	10.376	19.5312	29.6021	41.5039	55.8472	73.5474
109.7	-21.0571	-14.0381	-8.54492	-3.05176	2.44141	10.0708	19.5312	29.2969	41.8091	56.1523	73.2422
109.8	-20.752	-14.0381	-8.54492	-2.74658	2.44141	9.76563	19.5312	28.9917	42.1143	56.1523	73.2422
109.9	-20.4468	-14.0381	-8.54492	-2.74658	2.13623	9.76563	18.9209	28.6865	42.1143	55.8472	72.937
110	-20.4468	-14.0381	-8.8501	-2.74658	2.13623	9.76563	18.6157	28.6865	41.8091	55.542	72.6318
110.1	-20.4468	-13.7329	-9.46045	-2.74658	2.44141	9.76563	18.6157	28.3813	41.5039	55.542	72.6318
110.2	-20.4468	-14.0381	-9.76562	-3.05176	2.74658	10.0708	18.6157	28.3813	41.1987	55.542	72.3267
110.3	-20.1416	-14.3433	-10.0708	-3.35693	3.35693	9.76563	18.6157	28.0762	41.1987	55.8472	72.3267
110.4	-20.1416	-14.6484	-10.0708	-3.35693	3.96729	9.76563	18.3105	27.771	41.1987	56.1523	72.3267
110.5	-20.752	-15.2588	-10.0708	-3.05176	3.96729	9.46045	18.3105	27.4658	41.5039	56.1523	72.3267
110.6	-21.0571	-15.564	-10.0708	-2.74658	3.66211	9.76563	18.3105	27.771	42.1143	56.1523	72.6318
110.7	-21.3623	-15.8691	-9.76562	-2.74658	3.05176	10.376	18.0054	28.0762	42.4194	55.8472	72.937
110.8	-21.3623	-16.1743	-9.46045	-2.74658	2.13623	10.6812	18.0054	28.3813	42.1143	55.542	73.2422
110.9	-21.0571	-16.1743	-9.46045	-2.44141	1.83105	10.6812	18.3105	28.9917	41.5039	55.2368	73.2422
111	-20.752	-15.8691	-9.46045	-2.13623	2.44141	10.6812	18.6157	29.2969	41.5039	55.2368	73.2422
111.1	-21.0571	-15.564	-9.46045	-1.83105	3.05176	10.6812	19.5312	29.6021	41.5039	54.9316	73.5474
111.2	-21.3623	-15.2588	-9.15527	-1.83105	3.35693	10.6812	20.1416	29.6021	42.1143	54.9316	73.5474
111.3	-21.3623	-14.9536	-8.54492	-2.44141	3.05176	10.6812	20.4468	29.6021	42.1143	55.2368	73.8525
111.4	-21.3623	-14.3433	-7.93457	-3.05176	3.05176	10.6812	20.4468	29.2969	42.1143	55.542	73.5474
111.5	-20.752	-13.7329	-7.62939	-3.35693	3.35693	10.6812	20.4468	29.2969	41.8091	55.542	73.5474
111.6	-20.4468	-13.1226	-7.62939	-3.05176	3.66211	10.376	20.4468	29.2969	41.1987	55.8472	73.5474
111.7	-20.4468	-13.4277	-7.93457	-2.74658	3.96729	10.6812	20.1416	28.9917	41.1987	56.1523	74.1577
111.8	-20.4468	-14.0381	-8.23975	-2.44141	3.66211	10.9863	19.8364	28.9917	41.5039	56.4575	74.1577
111.9	-20.4468	-14.3433	-8.8501	-2.44141	3.35693	11.2915	19.2261	28.6865	42.1143	56.1523	74.1577
112	-20.4468	-14.0381	-8.8501	-1.83105	3.05176	11.5967	18.3105	28.3813	42.1143	56.1523	73.5474
112.1	-20.4468	-13.1226	-9.15527	-1.83105	3.05176	10.9863	17.7002	28.6865	41.5039	55.8472	72.937
112.2	-20.752	-12.8174	-9.15527	-2.44141	3.35693	10.376	17.7002	28.6865	41.1987	55.8472	72.6318
112.3	-21.0571	-12.8174	-9.15527	-3.35693	3.05176	10.376	18.3105	28.3813	41.1987	56.1523	72.3267
112.4	-21.0571	-13.1226	-8.8501	-4.27246	3.05176	10.376	18.9209	28.3813	41.5039	56.7627	72.3267
112.5	-20.752	-13.7329	-8.54492	-4.57764	3.05176	10.376	18.6157	28.6865	41.5039	57.373	72.937
112.6	-20.752	-14.0381	-8.8501	-3.96729	3.35693	10.0708	18.3105	29.2969	41.5039	57.373	73.2422
112.7	-20.752	-14.9536	-8.8501	-3.35693	3.05176	9.46045	17.7002	29.6021	41.8091	57.0679	73.5474
112.8	-21.0571	-15.564	-8.54492	-2.74658	3.05176	9.46045	17.7002	29.6021	42.1143	56.4575	74.1577
112.9	-21.3623	-15.8691	-8.23975	-2.44141	3.05176	9.46045	18.0054	29.6021	42.4194	56.1523	74.4629
113	-20.752	-15.8691	-7.93457	-2.44141	2.74658	9.46045	18.6157	29.2969	42.4194	56.7627	74.7681
113.1	-20.1416	-15.8691	-7.62939	-2.44141	2.74658	9.46045	19.2261	28.9917	42.1143	57.373	74.7681
113.2	-20.1416	-15.8691	-7.62939	-2.13623	2.74658	9.76563	19.5312	28.0762	42.1143	57.6782	74.4629
113.3	-20.4468	-15.564	-7.93457	-1.83105	3.35693	10.0708	19.2261	28.0762	41.8091	57.6782	74.4629
113.4	-20.752	-15.2588	-8.54492	-1.83105	3.35693	9.46045	19.5312	28.3813	41.5039	57.0679	74.4629
113.5	-20.4468	-14.6484	-9.15527	-1.83105	3.05176	9.15527	19.8364	28.3813	40.8936	56.4575	74.1577
113.6	-20.1416	-14.0381	-9.15527	-2.13623	2.74658	9.76563	19.8364	28.6865	40.5884	56.1523	73.5474
113.7	-20.1416	-14.0381	-9.15527	-2.74658	2.74658	10.6812	19.5312	28.9917	40.5884	56.1523	72.937
113.8	-19.8364	-14.0381	-9.46045	-3.05176	3.66211	11.2915	19.2261	29.2969	40.8936	56.7627	72.937
113.9	-19.8364	-14.6484	-9.46045	-2.74658	3.96729	11.5967	19.5312	29.6021	41.5039	57.373	73.5474
114	-19.8364	-15.564	-9.15527	-2.74658	4.27246	11.9019	19.5312	29.6021	41.8091	57.373	73.5474
114.1	-20.4468	-15.2588	-8.8501	-3.05176	3.96729	12.207	19.8364	29.9072	42.1143	57.0679	73.2422
114.2	-21.3623	-14.6484	-8.8501	-3.35693	3.35693	12.207	19.8364	30.2124	42.4194	57.0679	72.937
114.3	-21.6675	-14.3433	-8.54492	-3.66211	2.74658	11.9019	20.1416	30.2124	42.7246	57.373	72.937
114.4	-21.9727	-14.3433	-8.54492	-3.35693	2.13623	11.2915	20.4468	30.2124	42.7246	57.0679	73.5474
114.5	-21.9727	-14.3433	-8.8501	-2.74658	1.83105	10.9863	20.4468	29.6021	42.4194	56.7627	74.4629
114.6	-21.6675	-14.0381	-8.8501	-2.74658	2.44141	10.6812	19.8364	29.2969	42.4194	56.1523	75.0732
114.7	-21.6675	-13.1226	-8.8501	-2.44141	3.05176	10.376	19.2261	28.9917	42.7246	55.8472	74.7681
114.8	-21.3623	-12.5122	-8.8501	-2.13623	3.35693	10.376	18.3105	28.9917	43.0298	55.542	74.4629
114.9	-20.4468	-12.5122	-8.54492	-2.44141	3.35693	10.376	17.395	29.2969	42.7246	55.2368	74.1577
115	-19.8364	-13.1226	-8.54492	-3.05176	3.05176	9.76563	17.395	29.9072	42.4194	55.2368	73.5474
115.1	-19.5312	-13.7329	-8.54492	-3.66211	3.05176	9.46045	17.7002	30.2124	41.8091	55.8472	73.2422
115.2	-19.5312	-14.0381	-8.54492	-3.96729	3.35693	9.46045	18.3105	29.9072	41.8091	56.1523	72.6318
115.3	-19.5312	-14.3433	-8.54492	-3.66211	3.35693	9.76563	19.2261	29.6021	42.4194	56.7627	72.0215
115.4	-19.2261	-14.0381	-8.54492	-3.35693	3.66211	9.76563	19.5312	29.2969	43.0298	57.0679	71.7163
115.5	-19.5312	-14.3433	-8.54492	-3.05176	3.66211	10.0708	19.8364	28.9917	43.0298	57.6782	72.0215
115.6	-20.1416	-14.3433	-8.8501	-3.05176	3.96729	10.6812	19.5312	28.6865	42.4194	57.6782	72.6318
115.7	-21.3623	-14.0381	-8.8501	-3.05176	3.96729	11.2915	19.2261	28.6865	42.4194	57.373	73.2422
115.8	-21.9727	-14.0381	-8.54492	-2.44141	3.66211	11.2915	19.2261	28.6865	42.4194	56.7627	73.8525
115.9	-22.2778	-13.7329	-8.54492	-2.13623	3.35693	10.9863	18.9209	29.2969	42.4194	56.4575	74.4629
116	-22.2778	-13.4277	-8.54492	-2.13623	3.05176	10.376	18.9209	29.9072	42.4194	56.7627	74.7681
116.1	-21.6675	-14.0381	-8.23975	-2.13623	3.05176	10.376	18.9209	30.2124	42.1143	57.0679	75.0732
116.2	-21.6675	-14.3433	-7.62939	-2.44141	2.44141	10.9863	19.2261	29.9072	42.1143	57.6782	74.7681
116.3	-21.3623	-14.6484	-7.32422	-3.05176	2.13623	11.2915	19.2261	29.6021	42.1143	57.9834	74.7681
116.4	-20.752	-14.6484	-7.32422	-3.66211	1.83105	11.2915	19.5312	29.6021	42.1143	57.9834	74.7681
116.5	-21.0571	-14.6484	-7.62939	-3.96729	2.13623	10.6812	19.5312	29.9072	42.4194	57.6782	74.7681
116.6	-21.3623	-14.6484	-7.93457	-3.96729	2.44141	10.0708	19.5312	29.9072	42.4194	57.373	75.3784
116.7	-21.6675	-14.0381	-8.23975	-3.35693	2.74658	9.15527	19.2261	29.9072	42.4194	56.7627	75.6836
116.8	-21.6675	-13.7329	-7.93457	-2.74658	3.05176	8.54492	19.5312	29.9072	42.1143	56.4575	75.3784
116.9	-21.0571	-13.4277	-7.62939	-1.83105	3.66211	8.23975	19.8364	29.9072	41.8091	56.1523	74.7681
117	-20.4468	-13.7329	-7.62939	-1.52588	3.96729	8.8501	19.5312	29.6021	41.5039	56.4575	74.7681
117.1	-20.1416	-14.3433	-7.93457	-1.2207	3.66211	10.0708	18.9209	29.6021	41.5039	57.373	74.7681
117.2	-19.8364	-14.6484	-8.8501	-0.915527	3.66211	10.9863	18.6157	29.6021	41.5039	58.2886	74.4629
117.3	-20.1416	-14.6484	-9.15527	-0.915527	3.96729	11.5967	18.3105	29.2969	41.8091	58.5937	73.5474
117.4	-20.1416	-14.6484	-9.15527	-1.2207	4.57764	11.2915	18.3105	29.6021	42.1143	58.2886	72.6318
117.5	-20.1416	-14.3433	-8.8501	-1.52588	4.57764	10.9863	18.6157	29.9072	42.1143	57.373	72.3267
117.6	-20.1416	-14.0381	-8.23975	-1.52588	4.27246	10.6812	19.2261	30.2124	41.8091	56.7627	72.3267
117.7	-20.4468	-13.7329	-7.93457	-1.52588	3.96729	10.376	19.8364	30.2124	42.1143	56.4575	72.6318
117.8	-20.752	-13.4277	-7.32422	-1.52588	3.66211	10.376	20.1416	30.2124	42.1143	56.4575	72.6318
117.9	-20.752	-13.4277	-6.71387	-1.52588	3.66211	10.6812	20.1416	30.2124	42.4194	56.7627	72.937
118	-20.752	-14.3433	-6.40869	-2.13623	3.96729	10.9863	20.1416	30.2124	42.7246	57.0679	73.5474
118.1	-20.4468	-15.2588	-6.71387	-2.13623	3.66211	10.9863	19.8364	29.6021	43.0298	57.0679	73.8525
118.2	-20.1416	-15.8691	-7.93457	-2.44141	3.05176	10.9863	19.5312	28.9917	43.335	56.7627	74.1577
118.3	-19.5312	-15.2588	-9.15527	-2.74658	2.74658	10.6812	19.5312	28.3813	43.9453	56.7627	73.8525
118.4	-19.8364	-14.0381	-9.76562	-2.44141	2.74658	10.6812	19.5312	28.0762	43.6401	57.0679	73.5474
118.5	-20.1416	-13.1226	-9.76562	-2.74658	3.35693	10.6812	19.5312	28.0762	43.335	57.373	73.5474
118.6	-20.752	-12.8174	-9.46045	-3.05176	3.35693	10.6812	19.5312	28.6865	42.7246	57.0679	73.8525
118.7	-21.0571	-13.1226	-9.46045	-3.35693	3.66211	10.9863	19.5312	29.2969	42.1143	56.7627	73.8525
118.8	-21.0571	-13.1226	-9.15527	-3.35693	3.66211	11.2915	19.5312	29.2969	41.5039	56.7627	73.5474
118.9	-21.0571	-12.8174	-8.8501	-3.05176	3.96729	11.2915	19.5312	29.6021	41.5039	57.0679	73.5474
119	-20.752	-12.8174	-8.23975	-2.74658	3.66211	10.9863	19.5312	29.2969	41.8091	57.373	73.5474
119.1	-20.752	-13.1226	-7.93457	-1.83105	3.35693	10.6812	18.9209	29.6021	42.7246	57.6782	73.2422
119.2	-20.4468	-13.7329	-7.62939	-1.52588	3.35693	10.376	18.6157	29.2969	43.6401	57.6782	72.937
119.3	-19.8364	-14.0381	-7.62939	-1.52588	3.35693	10.376	18.3105	28.9917	43.6401	57.6782	73.2422
119.4	-19.5312	-14.3433	-7.62939	-1.83105	3.35693	10.0708	18.6157	28.6865	43.0298	57.6782	73.5474
119.5	-19.8364	-14.3433	-8.23975	-2.44141	3.66211	10.376	18.9209	28.6865	42.1143	57.6782	73.8525
119.6	-20.4468	-14.3433	-8.54492	-2.74658	3.66211	10.6812	19.2261	28.9917	41.8091	57.9834	74.4629
119.7	-20.4468	-14.0381	-9.15527	-2.74658	3.66211	10.9863	19.2261	28.9917	41.8091	57.9834	74.1577
119.8	-20.4468	-13.7329	-9.46045	-2.74658	3.66211	10.9863	18.9209	29.2969	42.1143	57.9834	73.8525
119.9	-20.1416	-13.4277	-9.15527	-2.44141	3.96729	10.9863	18.6157	29.2969	42.7246	57.6782	73.8525
120	-19.8364	-13.1226	-8.54492	-2.44141	3.96729	10.9863	18.3105	29.6021	43.0298	57.373	74.1577
120.1	-19.8364	-13.1226	-8.23975	-2.74658	3.66211	10.9863	18.0054	29.6021	43.335	56.7627	74.1577
120.2	-20.4468	-13.4277	-8.23975	-3.35693	3.66211	10.6812	18.3105	28.9917	43.335	56.7627	74.1577
120.3	-20.752	-13.7329	-8.23975	-3.96729	3.66211	10.376	18.9209	28.3813	43.0298	57.373	74.1577
120.4	-21.0571	-14.3433	-8.23975	-3.96729	3.66211	10.376	19.5312	28.0762	42.4194	57.373	74.1577
120.5	-21.3623	-14.3433	-8.8501	-3.96729	3.66211	10.6812	19.8364	28.3813	41.8091	57.373	74.1577
120.6	-21.3623	-14.0381	-9.15527	-3.66211	3.96729	10.9863	20.1416	28.6865	41.5039	56.7627	73.8525
120.7	-21.0571	-13.7329	-9.76562	-3.05176	3.96729	10.9863	20.1416	29.6021	41.8091	56.4575	73.8525
120.8	-20.752	-13.1226	-9.46045	-2.44141	3.66211	11.2915	20.1416	30.2124	42.1143	56.4575	74.4629
120.9	-20.4468	-13.1226	-8.8501	-2.13623	3.35693	10.9863	19.8364	30.2124	42.4194	56.7627	74.4629
121	-20.1416	-13.1226	-8.23975	-2.44141	3.35693	10.376	19.8364	29.9072	43.0298	57.373	74.1577
121.1	-19.8364	-13.4277	-7.62939	-2.74658	3.35693	9.76563	19.5312	29.6021	43.6401	57.373	73.5474
121.2	-19.2261	-14.0381	-7.32422	-2.74658	3.35693	9.76563	19.5312	29.9072	43.6401	56.4575	73.2422
121.3	-18.9209	-14.3433	-7.62939	-2.44141	3.05176	10.0708	19.5312	30.2124	42.7246	55.542	73.2422
121.4	-18.9209	-14.0381	-7.93457	-1.83105	3.35693	10.376	19.8364	30.2124	41.8091	54.9316	72.937
121.5	-19.5312	-13.7329	-8.23975	-1.52588	3.66211	10.6812	20.1416	29.9072	41.5039	54.9316	72.3267
121.6	-20.1416	-13.7329	-8.23975	-1.2207	4.27246	10.9863	19.5312	29.6021	41.5039	55.542	72.0215
121.7	-20.4468	-13.7329	-8.23975	-1.2207	4.57764	10.6812	18.6157	29.6021	42.1143	56.4575	71.7163
121.8	-20.4468	-14.0381	-8.54492	-1.2207	4.27246	10.0708	18.0054	29.2969	42.1143	56.7627	71.7163
121.9	-19.8364	-13.7329	-8.23975	-1.2207	3.35693	9.76563	17.7002	28.9917	42.4194	56.7627	71.4111
122	-19.5312	-13.1226	-7.62939	-2.13623	3.05176	9.46045	18.0054	28.6865	42.4194	57.0679	71.106
122.1	-19.5312	-11.9019	-7.62939	-3.05176	3.05176	9.46045	18.3105	28.6865	42.7246	57.373	71.106
122.2	-19.2261	-11.5967	-8.23975	-3.35693	3.35693	9.76563	18.9209	28.9917	42.7246	57.6782	71.106
122.3	-19.2261	-12.207	-8.8501	-3.05176	3.66211	10.0708	18.9209	29.2969	42.4194	57.6782	71.7163
122.4	-19.8364	-13.1226	-9.15527	-2.74658	3.66211	10.376	18.9209	29.6021	42.1143	57.373	72.0215
122.5	-20.4468	-13.7329	-8.8501	-2.44141	3.35693	10.376	18.6157	29.6021	42.4194	57.0679	72.6318
122.6	-20.752	-14.3433	-8.54492	-2.44141	3.05176	10.376	18.6157	29.2969	42.7246	57.373	72.6318
122.7	-20.752	-14.6484	-8.23975	-2.74658	3.35693	10.376	18.9209	28.9917	42.7246	57.373	72.3267
122.8	-21.0571	-14.9536	-8.23975	-2.74658	3.05176	10.0708	18.9209	28.9917	42.4194	56.7627	72.0215
122.9	-21.3623	-14.9536	-8.23975	-2.13623	3.05176	10.0708	18.9209	29.2969	42.7246	56.1523	72.0215
123	-21.3623	-14.6484	-8.8501	-1.52588	3.05176	10.0708	18.9209	29.6021	42.4194	56.1523	72.0215
123.1	-21.3623	-14.3433	-9.46045	-1.52588	2.74658	9.76563	18.9209	29.9072	42.4194	56.1523	72.0215
123.2	-21.3623	-14.3433	-9.46045	-1.83105	2.74658	9.46045	19.2261	29.6021	42.1143	56.4575	72.3267
123.3	-21.0571	-14.0381	-8.8501	-2.44141	2.74658	9.46045	19.5312	29.2969	42.1143	56.7627	72.3267
123.4	-20.4468	-14.0381	-8.23975	-2.74658	3.35693	9.76563	19.5312	28.6865	42.1143	56.7627	72.6318
123.5	-20.1416	-14.3433	-7.32422	-2.74658	3.66211	10.376	19.2261	28.3813	42.1143	57.0679	72.937
123.6	-19.8364	-14.6484	-7.32422	-2.74658	3.66211	10.6812	19.2261	28.6865	42.1143	57.0679	73.5474
123.7	-20.1416	-14.6484	-7.62939	-3.05176	3.35693	10.6812	19.2261	29.2969	41.8091	56.7627	73.5474
123.8	-20.4468	-14.3433	-7.93457	-3.05176	3.05176	10.6812	19.2261	29.9072	41.8091	57.0679	73.5474
123.9	-20.752	-13.7329	-8.23975	-2.74658	3.05176	10.376	19.5312	30.2124	42.1143	57.0679	72.937
124	-21.3623	-13.4277	-8.54492	-2.74658	3.66211	10.376	19.8364	30.2124	42.1143	57.0679	72.3267
124.1	-21.6675	-13.7329	-8.8501	-3.05176	4.27246	10.0708	19.5312	30.5176	42.1143	57.373	72.0215
124.2	-21.3623	-14.0381	-8.54492	-3.35693	3.96729	10.0708	19.5312	30.5176	41.8091	57.373	72.0215
124.3	-21.0571	-14.3433	-7.62939	-3.66211	3.66211	10.0708	19.5312	30.2124	42.1143	57.0679	72.6318
124.4	-20.752	-14.6484	-7.32422	-3.66211	3.05176	10.0708	19.8364	29.6021	42.4194	56.7627	72.937
124.5	-20.752	-14.6484	-7.32422	-3.35693	2.44141	10.0708	19.8364	28.9917	42.7246	57.0679	73.5474
124.6	-21.3623	-14.3433	-7.62939	-3.05176	2.13623	10.0708	19.5312	28.9917	42.7246	57.0679	73.8525
124.7	-21.6675	-13.7329	-7.93457	-2.74658	2.13623	10.0708	19.5312	28.9917	42.1143	57.0679	73.8525
124.8	-21.3623	-13.7329	-7.93457	-2.74658	2.44141	10.376	19.2261	28.9917	41.8091	56.4575	73.2422
124.9	-21.0571	-13.7329	-8.23975	-2.74658	3.05176	10.6812	19.2261	29.6021	41.8091	56.1523	72.937
125	-20.752	-14.0381	-8.8501	-3.05176	3.96729	10.9863	19.2261	29.9072	41.8091	56.1523	72.3267
125.1	-20.1416	-14.3433	-9.15527	-2.44141	4.27246	11.5967	18.9209	29.9072	42.4194	56.4575	72.3267
125.2	-19.2261	-14.9536	-9.46045	-1.83105	4.27246	11.5967	18.9209	28.9917	42.7246	56.7627	72.0215
125.3	-18.9209	-14.9536	-9.46045	-1.2207	4.27246	11.5967	18.6157	28.6865	42.7246	56.7627	71.7163
125.4	-18.9209	-14.0381	-9.15527	-0.915527	4.27246	10.6812	18.3105	28.6865	42.7246	56.4575	71.4111
125.5	-19.5312	-13.4277	-9.15527	-0.915527	3.66211	10.0708	18.6157	29.2969	42.4194	55.8472	71.106
125.6	-20.1416	-13.4277	-8.8501	-0.915527	3.35693	10.0708	19.2261	29.9072	41.8091	55.2368	70.8008
125.7	-20.4468	-13.7329	-8.8501	-1.52588	2.74658	10.376	20.1416	29.9072	41.5039	55.542	71.106
125.8	-20.4468	-14.6484	-8.8501	-2.13623	2.74658	10.9863	20.4468	29.2969	41.1987	55.8472	71.4111
125.9	-20.752	-14.9536	-8.54492	-2.44141	2.74658	10.9863	20.4468	28.6865	40.8936	55.8472	71.7163
126	-21.6675	-15.2588	-8.23975	-2.74658	3.05176	11.2915	20.1416	28.0762	40.8936	55.8472	72.0215
126.1	-21.9727	-14.9536	-7.93457	-3.05176	2.74658	10.9863	19.5312	28.0762	41.1987	56.7627	72.3267
126.2	-22.2778	-14.6484	-7.32422	-3.66211	2.13623	10.6812	18.9209	28.0762	41.5039	57.373	72.6318
126.3	-21.9727	-14.3433	-7.01904	-4.57764	1.83105	10.6812	18.3105	28.3813	41.5039	57.6782	72.937
126.4	-21.3623	-14.3433	-7.32422	-4.88281	1.52588	10.376	18.3105	28.9917	41.8091	57.0679	72.937
126.5	-21.0571	-14.6484	-7.93457	-4.57764	1.83105	10.376	18.6157	28.9917	42.1143	56.1523	72.6318
126.6	-21.0571	-14.6484	-8.54492	-3.66211	2.44141	10.0708	18.9209	28.6865	42.4194	55.2368	72.0215
126.7	-21.3623	-14.3433	-8.8501	-2.74658	3.05176	10.0708	18.9209	28.3813	42.7246	55.2368	71.7163
126.8	-21.3623	-14.0381	-8.8501	-2.44141	3.35693	10.376	18.6157	28.3813	42.7246	55.542	71.7163
126.9	-21.0571	-13.4277	-8.8501	-3.05176	3.35693	10.6812	18.0054	28.9917	42.4194	56.4575	72.0215
127	-20.4468	-13.1226	-9.15527	-3.96729	3.35693	10.6812	17.7002	29.2969	41.8091	57.0679	72.3267
127.1	-19.5312	-13.4277	-9.15527	-4.57764	3.05176	10.6812	18.0054	29.2969	41.1987	57.373	72.6318
127.2	-19.2261	-13.7329	-8.8501	-4.57764	3.35693	10.376	18.6157	29.2969	41.1987	57.6782	73.2422
127.3	-19.8364	-14.0381	-8.23975	-3.96729	3.66211	10.0708	18.9209	29.2969	41.1987	57.0679	73.8525
127.4	-20.752	-14.0381	-7.93457	-3.05176	3.66211	9.46045	19.2261	29.2969	41.5039	56.4575	74.4629
127.5	-21.3623	-14.0381	-8.23975	-2.44141	3.66211	9.15527	18.9209	29.2969	41.5039	55.8472	74.4629
127.6	-21.0571	-14.3433	-8.23975	-1.83105	3.35693	9.15527	18.3105	29.9072	41.5039	55.542	73.8525
127.7	-20.752	-14.6484	-8.54492	-1.83105	3.66211	9.76563	18.0054	30.5176	41.8091	55.542	73.5474
127.8	-20.4468	-14.9536	-8.23975	-2.44141	3.96729	10.376	17.7002	30.8228	42.1143	55.542	73.5474
127.9	-20.1416	-15.2588	-8.23975	-2.44141	3.96729	10.376	18.0054	30.5176	42.4194	55.8472	73.2422
128	-20.1416	-15.564	-8.54492	-2.44141	3.66211	10.0708	18.6157	29.9072	42.7246	55.8472	72.937
128.1	-19.8364	-15.564	-8.8501	-2.74658	3.05176	10.0708	18.9209	29.2969	43.335	55.8472	72.3267
128.2	-20.1416	-15.564	-9.46045	-2.74658	2.74658	10.376	18.9209	28.9917	43.335	56.1523	72.0215
128.3	-20.4468	-15.2588	-9.15527	-2.44141	3.05176	10.376	18.9209	28.6865	43.0298	56.4575	71.7163
128.4	-21.0571	-14.6484	-8.8501	-1.83105	3.35693	10.0708	19.2261	28.3813	42.7246	57.0679	71.4111
128.5	-21.3623	-14.0381	-8.54492	-1.2207	3.66211	9.76563	19.2261	28.3813	42.7246	57.373	71.7163
128.6	-21.6675	-13.7329	-8.54492	-1.2207	3.66211	10.0708	18.9209	28.9917	43.335	57.373	72.3267
128.7	-21.9727	-13.4277	-8.54492	-1.52588	3.66211	10.376	18.6157	29.9072	43.335	57.373	72.6318
128.8	-21.6675	-13.4277	-8.54492	-1.83105	3.05176	10.0708	18.6157	30.2124	43.0298	57.373	72.937
128.9	-21.3623	-13.7329	-8.54492	-1.83105	2.74658	10.0708	18.6157	30.5176	42.4194	57.0679	73.2422
129	-21.0571	-13.7329	-8.8501	-2.13623	2.44141	10.0708	18.3105	30.2124	41.8091	56.4575	72.937
129.1	-21.0571	-13.7329	-8.8501	-3.05176	2.44141	10.6812	18.3105	29.6021	42.1143	55.8472	72.3267
129.2	-21.0571	-13.4277	-8.8501	-3.96729	2.44141	11.2915	18.3105	28.9917	41.8091	55.2368	72.0215
129.3	-20.752	-13.7329	-8.54492	-4.27246	2.74658	11.2915	18.6157	28.9917	41.5039	55.2368	72.0215
129.4	-20.752	-14.6484	-8.54492	-3.96729	2.74658	11.5967	18.6157	28.9917	41.1987	55.2368	72.3267
129.5	-20.752	-15.2588	-8.54492	-3.35693	2.44141	11.5967	18.6157	29.2969	40.8936	54.9316	72.937
129.6	-21.0571	-15.8691	-8.54492	-3.05176	2.74658	11.5967	18.9209	29.6021	40.2832	54.9316	73.2422
129.7	-21.0571	-15.8691	-9.15527	-3.35693	3.05176	11.5967	18.6157	29.2969	40.2832	55.2368	73.2422
129.8	-21.3623	-15.564	-9.15527	-3.35693	3.05176	10.9863	18.6157	28.9917	40.5884	55.542	73.2422
129.9	-21.0571	-14.9536	-8.8501	-3.05176	3.05176	10.9863	18.6157	28.6865	41.5039	56.1523	72.937
130	-20.752	-14.3433	-8.54492	-2.44141	3.05176	10.9863	18.6157	28.9917	42.4194	56.1523	72.3267
130.1	-20.752	-13.4277	-7.93457	-2.44141	3.05176	10.376	19.2261	29.2969	42.7246	56.1523	71.7163
130.2	-20.752	-13.1226	-7.93457	-2.74658	2.74658	10.0708	19.5312	29.2969	43.0298	55.8472	71.106
130.3	-20.752	-13.1226	-7.93457	-3.66211	3.35693	10.376	19.8364	29.2969	43.335	56.4575	71.4111
130.4	-21.3623	-13.7329	-7.62939	-4.27246	3.66211	10.6812	19.8364	29.6021	43.335	56.7627	72.0215
130.5	-21.0571	-13.7329	-7.93457	-3.96729	4.27246	10.9863	19.8364	29.6021	42.7246	56.7627	72.6318
130.6	-20.752	-14.0381	-8.23975	-2.74658	4.27246	11.2915	20.1416	29.6021	42.1143	56.1523	72.937
130.7	-20.1416	-14.9536	-7.93457	-1.83105	3.66211	11.2915	20.1416	29.2969	42.1143	55.542	72.937
130.8	-20.4468	-15.2588	-7.62939	-1.52588	3.05176	10.9863	20.1416	28.9917	42.1143	55.2368	72.6318
130.9	-20.4468	-14.6484	-7.32422	-1.52588	3.05176	11.2915	19.8364	28.9917	42.1143	55.2368	72.3267
131	-20.1416	-13.7329	-7.32422	-2.13623	3.05176	11.2915	19.5312	28.9917	41.8091	55.2368	72.3267
131.1	-20.1416	-13.4277	-7.32422	-2.74658	3.66211	11.2915	19.2261	28.9917	41.8091	55.542	72.6318
131.2	-20.4468	-13.4277	-7.62939	-3.05176	3.96729	11.5967	18.9209	29.2969	42.1143	56.1523	72.3267
131.3	-21.0571	-13.7329	-8.23975	-3.35693	4.27246	11.5967	18.6157	29.9072	42.4194	57.0679	72.3267
131.4	-20.752	-13.7329	-8.54492	-3.35693	4.57764	11.2915	18.3105	30.2124	42.4194	57.6782	72.6318
131.5	-20.4468	-13.7329	-8.23975	-3.05176	4.57764	10.9863	18.3105	30.5176	42.4194	58.5937	72.937
131.6	-20.1416	-14.0381	-8.23975	-2.13623	4.27246	10.6812	18.9209	30.2124	42.4194	58.2886	73.2422
131.7	-19.8364	-14.3433	-7.93457	-1.2207	3.96729	10.376	19.8364	30.2124	42.4194	57.9834	72.6318
131.8	-19.5312	-14.6484	-7.93457	-0.915527	3.35693	10.376	20.4468	29.6021	42.4194	57.9834	72.0215
131.9	-19.5312	-14.6484	-7.93457	-1.2207	2.74658	10.376	20.752	29.6021	42.1143	57.6782	71.7163
132	-19.5312	-14.6484	-8.23975	-1.52588	2.13623	10.376	20.4468	29.2969	41.8091	57.373	72.0215
132.1	-19.5312	-14.3433	-8.8501	-1.83105	2.13623	10.6812	19.8364	28.9917	41.8091	57.373	72.6318
132.2	-19.8364	-14.3433	-9.15527	-2.44141	2.74658	10.9863	19.8364	28.6865	42.1143	57.373	72.937
132.3	-20.1416	-14.3433	-9.46045	-2.74658	3.66211	11.5967	20.1416	28.6865	42.1143	57.0679	72.6318
132.4	-20.1416	-14.0381	-8.8501	-3.05176	4.57764	11.5967	20.4468	28.9917	41.8091	56.4575	72.6318
132.5	-19.8364	-13.7329	-7.93457	-2.74658	5.49316	11.5967	20.4468	29.6021	41.8091	56.1523	72.3267
132.6	-19.2261	-13.4277	-7.32422	-2.44141	5.79834	11.2915	19.8364	30.2124	41.8091	55.8472	72.6318
132.7	-19.2261	-13.7329	-6.71387	-2.13623	5.79834	11.2915	19.5312	30.5176	41.8091	55.8472	73.5474
132.8	-19.5312	-14.3433	-6.71387	-2.13623	5.49316	11.2915	19.2261	30.2124	42.4194	56.4575	73.8525
132.9	-19.8364	-14.3433	-7.01904	-1.83105	4.57764	11.5967	18.9209	29.2969	43.0298	57.373	73.8525
133	-19.8364	-14.3433	-7.62939	-1.52588	3.66211	11.5967	18.6157	28.9917	43.0298	58.2886	74.1577
133.1	-19.8364	-14.0381	-8.23975	-1.2207	3.05176	11.2915	18.0054	28.3813	42.4194	58.8989	74.1577
133.2	-20.1416	-13.7329	-8.54492	-1.52588	2.44141	10.9863	17.7002	28.0762	42.1143	58.8989	74.4629
133.3	-20.1416	-13.7329	-8.8501	-2.44141	2.44141	10.376	17.7002	27.771	41.8091	58.8989	74.7681
133.4	-20.1416	-13.4277	-9.15527	-2.74658	2.44141	9.76563	18.3105	28.3813	41.8091	58.5937	74.7681
133.5	-20.4468	-13.1226	-9.15527	-3.35693	2.13623	9.76563	19.2261	29.2969	42.1143	58.2886	74.1577
133.6	-20.4468	-12.8174	-9.15527	-3.66211	2.13623	10.0708	20.1416	29.9072	42.1143	57.9834	73.5474
133.7	-20.752	-12.8174	-8.54492	-3.35693	2.44141	10.376	21.0571	29.9072	42.1143	57.6782	73.5474
133.8	-20.752	-13.1226	-7.93457	-2.74658	2.74658	10.6812	21.0571	29.6021	41.8091	57.6782	73.5474
133.9	-20.752	-13.7329	-7.62939	-2.13623	3.35693	10.9863	20.752	29.6021	41.8091	57.373	73.8525
134	-21.3623	-14.0381	-7.32422	-1.52588	3.35693	10.9863	20.1416	29.6021	42.1143	57.373	74.1577
134.1	-21.9727	-14.3433	-7.32422	-1.2207	3.35693	11.2915	19.2261	29.6021	42.1143	57.0679	74.4629
134.2	-22.2778	-14.3433	-7.32422	-1.2207	3.35693	11.2915	18.9209	29.6021	42.4194	57.0679	74.7681
134.3	-21.6675	-14.3433	-7.01904	-1.52588	3.35693	10.9863	18.9209	29.2969	43.0298	57.6782	74.4629
134.4	-20.4468	-14.6484	-6.71387	-1.52588	3.66211	10.9863	19.2261	28.9917	42.7246	57.9834	74.1577
134.5	-19.5312	-14.9536	-6.40869	-1.83105	3.35693	10.6812	19.2261	28.6865	42.1143	58.2886	74.1577
134.6	-19.2261	-15.2588	-6.71387	-2.44141	3.05176	10.0708	19.2261	28.6865	41.8091	58.2886	74.4629
134.7	-18.9209	-14.9536	-7.01904	-2.74658	2.74658	9.76563	19.5312	28.9917	41.5039	57.9834	74.7681
134.8	-18.9209	-14.6484	-7.32422	-3.05176	2.44141	9.76563	19.5312	28.9917	41.8091	57.9834	75.0732
134.9	-18.6157	-14.6484	-8.23975	-3.05176	2.13623	10.0708	19.5312	29.2969	42.4194	57.9834	75.0732
135	-18.6157	-14.6484	-9.15527	-2.74658	2.44141	10.6812	19.5312	29.2969	43.335	58.2886	74.4629
135.1	-18.9209	-14.6484	-9.76562	-2.13623	2.74658	11.2915	19.2261	29.2969	43.9453	58.5937	73.8525
135.2	-19.5312	-14.6484	-10.0708	-2.13623	3.35693	11.9019	19.2261	28.9917	43.9453	58.5937	73.8525
135.3	-19.8364	-14.3433	-9.46045	-2.13623	3.66211	12.207	18.9209	28.6865	44.2505	58.5937	73.5474
135.4	-20.4468	-13.7329	-9.15527	-2.13623	3.96729	12.207	18.6157	28.6865	43.9453	58.2886	73.8525
135.5	-20.752	-13.1226	-8.8501	-2.13623	4.27246	11.5967	18.6157	28.9917	43.6401	57.9834	74.1577
135.6	-20.752	-12.8174	-8.54492	-2.13623	4.27246	10.6812	18.3105	29.2969	42.7246	57.373	74.1577
135.7	-20.752	-13.1226	-8.23975	-2.13623	4.27246	9.76563	18.3105	29.6021	41.8091	57.0679	74.1577
135.8	-20.752	-13.7329	-7.93457	-2.74658	4.27246	9.15527	18.9209	29.9072	40.8936	57.0679	73.8525
135.9	-20.4468	-14.3433	-7.62939	-3.05176	4.27246	9.46045	19.5312	30.2124	40.5884	57.0679	73.2422
136	-20.4468	-14.6484	-7.93457	-2.74658	3.96729	10.376	20.1416	30.5176	40.5884	56.7627	73.2422
136.1	-20.4468	-14.3433	-7.93457	-2.44141	3.66211	10.376	20.752	30.2124	41.1987	57.0679	73.2422
136.2	-20.752	-14.0381	-8.23975	-2.44141	3.35693	10.376	20.752	29.9072	41.5039	57.0679	73.5474
136.3	-20.752	-13.4277	-8.23975	-2.74658	3.35693	10.0708	20.1416	29.2969	42.1143	56.7627	73.8525
136.4	-20.752	-12.8174	-8.54492	-3.05176	3.35693	10.0708	19.8364	28.9917	42.1143	56.4575	73.8525
136.5	-20.1416	-12.207	-8.54492	-3.05176	3.35693	10.376	19.5312	28.9917	42.1143	56.7627	73.8525
136.6	-19.8364	-11.9019	-8.23975	-3.35693	3.35693	10.6812	19.2261	29.2969	41.8091	57.0679	73.5474
136.7	-19.5312	-12.5122	-8.23975	-3.05176	3.66211	10.9863	19.2261	29.6021	41.8091	57.0679	72.937
136.8	-19.2261	-12.8174	-7.93457	-2.44141	3.96729	11.2915	19.2261	29.6021	42.1143	57.0679	72.937
136.9	-19.2261	-13.1226	-8.23975	-2.44141	3.66211	11.2915	19.8364	29.9072	42.4194	57.0679	73.2422
137	-19.2261	-13.4277	-7.93457	-2.44141	3.35693	11.2915	19.8364	30.2124	42.7246	57.0679	73.8525
137.1	-19.8364	-13.4277	-7.62939	-2.74658	2.74658	11.2915	19.5312	30.2124	42.7246	57.373	74.4629
137.2	-20.1416	-13.7329	-7.62939	-2.44141	2.44141	10.9863	18.9209	29.9072	43.0298	57.6782	74.7681
137.3	-20.1416	-14.0381	-7.62939	-2.13623	2.44141	10.376	18.6157	29.2969	43.335	57.6782	75.0732
137.4	-20.1416	-14.0381	-8.23975	-1.83105	2.74658	10.376	18.6157	28.6865	43.6401	57.6782	75.3784
137.5	-19.8364	-13.7329	-8.54492	-1.52588	3.05176	10.9863	18.9209	28.6865	43.6401	57.373	75.3784
137.6	-19.8364	-13.4277	-8.54492	-1.83105	3.05176	11.2915	19.5312	28.6865	43.6401	57.373	74.4629
137.7	-19.5312	-13.4277	-8.54492	-1.83105	3.35693	11.2915	19.8364	28.6865	43.335	57.6782	72.937
137.8	-19.5312	-13.1226	-8.8501	-2.13623	3.96729	10.9863	19.8364	28.6865	43.335	57.373	71.7163
137.9	-19.2261	-13.4277	-8.54492	-2.13623	4.57764	10.376	19.5312	29.6021	43.0298	56.7627	71.4111
138	-19.2261	-13.7329	-8.23975	-2.74658	4.88281	9.76563	19.2261	29.9072	42.1143	56.4575	71.7163
138.1	-19.8364	-13.4277	-7.93457	-3.05176	4.57764	9.76563	19.2261	30.2124	41.8091	56.1523	72.0215
138.2	-20.4468	-12.8174	-7.93457	-2.74658	4.27246	10.6812	18.9209	29.9072	41.5039	56.7627	72.937
138.3	-20.752	-12.5122	-7.93457	-2.13623	4.27246	11.9019	18.6157	29.6021	41.8091	56.7627	73.5474
138.4	-21.3623	-12.8174	-7.93457	-2.13623	4.57764	12.5122	18.6157	29.2969	42.4194	56.7627	74.1577
138.5	-21.6675	-12.8174	-7.93457	-1.83105	4.27246	12.5122	18.6157	29.2969	42.4194	56.4575	74.1577
138.6	-21.3623	-13.1226	-7.32422	-2.13623	3.35693	12.5122	18.9209	28.9917	42.4194	56.1523	74.1577
138.7	-21.3623	-13.4277	-6.71387	-2.44141	3.05176	11.5967	18.9209	28.6865	42.4194	56.1523	73.8525
138.8	-21.3623	-13.1226	-7.01904	-3.05176	2.74658	10.6812	18.9209	28.6865	42.4194	56.1523	73.5474
138.9	-20.4468	-13.4277	-7.62939	-3.35693	2.74658	10.0708	18.9209	28.6865	42.7246	56.1523	73.5474
139	-19.5312	-14.0381	-7.93457	-3.35693	2.44141	9.76563	18.6157	28.9917	42.7246	56.1523	74.1577
139.1	-19.8364	-14.3433	-8.23975	-3.05176	2.44141	9.76563	18.6157	29.6021	42.7246	56.4575	74.7681
139.2	-20.4468	-14.6484	-7.93457	-2.74658	2.44141	9.76563	18.9209	29.9072	42.1143	56.7627	75.0732
139.3	-21.0571	-14.6484	-7.62939	-2.44141	2.44141	9.76563	19.2261	30.2124	41.5039	56.4575	75.0732
139.4	-21.0571	-14.6484	-7.62939	-2.44141	2.74658	9.46045	19.8364	30.5176	41.1987	56.1523	74.7681
139.5	-20.752	-14.3433	-7.62939	-2.44141	3.05176	9.76563	19.8364	30.5176	41.1987	55.542	74.1577
139.6	-20.4468	-14.0381	-7.93457	-2.74658	3.35693	10.376	19.5312	30.5176	41.5039	55.2368	73.5474
139.7	-20.1416	-13.4277	-7.93457	-3.05176	3.66211	10.6812	19.2261	30.5176	42.4194	55.8472	72.6318
139.8	-20.1416	-13.1226	-7.93457	-3.66211	3.96729	10.9863	19.2261	30.2124	43.0298	56.7627	72.6318
139.9	-20.1416	-13.1226	-7.62939	-3.66211	4.27246	10.9863	19.2261	29.9072	43.0298	57.6782	72.937
140	-20.4468	-12.8174	-7.62939	-3.35693	4.27246	10.9863	19.2261	29.2969	42.4194	57.9834	72.6318
140.1	-20.752	-12.5122	-7.93457	-3.05176	3.66211	10.6812	18.9209	29.2969	41.8091	57.9834	72.3267
140.2	-21.0571	-12.5122	-7.93457	-2.74658	3.05176	10.0708	18.3105	29.2969	41.8091	57.9834	71.7163
140.3	-21.0571	-13.1226	-7.93457	-2.44141	2.13623	9.46045	18.0054	28.9917	42.1143	57.6782	71.7163
140.4	-20.752	-13.7329	-7.93457	-2.74658	2.13623	8.8501	18.3105	28.6865	42.4194	57.373	72.0215
140.5	-20.4468	-14.9536	-8.23975	-3.35693	2.74658	9.15527	18.9209	28.3813	42.4194	57.0679	72.0215
140.6	-20.1416	-15.564	-8.54492	-3.35693	3.35693	10.0708	19.5312	28.3813	42.4194	57.0679	72.0215
140.7	-19.8364	-15.564	-8.8501	-3.05176	3.66211	10.6812	19.8364	28.6865	42.7246	57.0679	71.7163
140.8	-19.8364	-14.9536	-8.8501	-2.44141	3.35693	10.6812	20.1416	28.3813	43.335	57.0679	72.0215
140.9	-20.4468	-14.3433	-8.54492	-2.13623	3.05176	10.6812	20.1416	28.6865	43.6401	57.0679	72.6318
141	-20.752	-14.0381	-8.23975	-2.44141	2.44141	10.6812	20.1416	28.9917	43.335	57.0679	73.5474
141.1	-21.0571	-13.7329	-7.93457	-2.13623	2.44141	10.6812	20.4468	28.6865	42.7246	57.373	73.8525
141.2	-21.0571	-13.7329	-7.62939	-1.83105	2.74658	10.6812	20.4468	28.3813	41.8091	57.9834	73.2422
141.3	-20.752	-14.0381	-7.62939	-1.52588	3.66211	10.6812	20.1416	28.3813	41.1987	57.6782	72.3267
141.4	-20.4468	-14.3433	-7.62939	-1.52588	4.57764	10.6812	20.1416	28.6865	40.5884	57.373	71.7163
141.5	-20.4468	-14.3433	-7.32422	-1.83105	4.88281	10.6812	19.8364	29.2969	40.8936	57.0679	71.7163
141.6	-20.4468	-14.0381	-7.32422	-1.83105	4.57764	10.9863	19.2261	29.6021	41.1987	57.0679	72.3267
141.7	-20.4468	-14.0381	-7.62939	-2.44141	3.66211	10.9863	18.3105	29.9072	41.5039	57.0679	72.6318
141.8	-20.752	-13.7329	-7.93457	-2.74658	2.74658	10.6812	17.395	30.2124	42.1143	57.373	72.937
141.9	-21.0571	-14.0381	-7.93457	-2.74658	2.44141	10.376	17.0898	29.9072	42.7246	57.373	72.6318
142	-21.0571	-14.3433	-7.62939	-2.44141	2.74658	10.0708	17.395	29.9072	42.7246	57.373	72.3267
142.1	-20.752	-14.3433	-7.93457	-2.13623	3.05176	10.0708	18.0054	29.6021	43.0298	57.373	72.3267
142.2	-20.752	-14.3433	-8.23975	-1.83105	3.05176	10.0708	18.3105	29.2969	43.0298	57.373	72.0215
142.3	-20.752	-14.3433	-8.8501	-2.13623	3.05176	10.0708	18.9209	29.2969	43.0298	57.373	72.3267
142.4	-21.0571	-14.6484	-9.46045	-2.44141	3.05176	10.376	19.2261	29.2969	43.0298	57.0679	72.0215
142.5	-21.0571	-14.3433	-9.46045	-2.44141	3.35693	10.6812	19.5312	29.2969	43.335	57.0679	71.7163
142.6	-21.3623	-14.0381	-9.46045	-2.13623	3.35693	10.9863	19.5312	28.9917	43.335	57.0679	71.4111
142.7	-21.3623	-13.4277	-9.46045	-2.13623	3.96729	10.9863	19.5312	28.6865	43.0298	57.0679	71.106
142.8	-21.3623	-13.7329	-9.15527	-2.44141	3.96729	10.9863	19.2261	28.3813	42.7246	57.373	71.4111
142.9	-21.3623	-14.0381	-9.15527	-3.05176	3.96729	10.9863	18.9209	28.0762	41.8091	57.373	72.3267
143	-21.0571	-14.6484	-8.23975	-3.66211	3.66211	10.9863	18.9209	27.771	41.1987	57.373	72.937
143.1	-20.752	-14.6484	-7.62939	-3.66211	3.35693	10.6812	18.9209	27.4658	41.1987	56.7627	72.937
143.2	-20.752	-14.6484	-7.32422	-3.66211	3.05176	10.0708	18.9209	27.4658	41.5039	56.7627	72.937
143.3	-20.752	-14.3433	-7.01904	-3.35693	3.05176	9.46045	19.2261	28.0762	41.8091	57.0679	72.3267
143.4	-20.752	-14.0381	-7.62939	-3.66211	2.44141	9.15527	19.5312	28.9917	41.8091	57.373	72.0215
143.5	-20.752	-14.0381	-7.93457	-3.35693	2.74658	8.8501	19.5312	29.6021	41.8091	57.6782	72.0215
143.6	-20.752	-14.0381	-8.23975	-3.05176	3.35693	8.8501	19.2261	29.9072	42.1143	58.2886	72.0215
143.7	-20.4468	-14.3433	-8.54492	-3.05176	3.96729	9.15527	18.9209	29.6021	42.4194	57.9834	72.3267
143.8	-20.4468	-14.3433	-8.8501	-3.05176	4.27246	9.76563	19.2261	28.9917	42.7246	57.373	72.3267
143.9	-20.4468	-13.7329	-8.8501	-3.05176	3.96729	10.376	19.2261	28.6865	42.7246	56.7627	72.0215
144	-20.752	-13.4277	-8.54492	-2.74658	3.35693	10.6812	18.9209	28.6865	42.4194	56.4575	72.0215
144.1	-21.0571	-12.8174	-7.93457	-2.44141	3.05176	10.6812	18.6157	28.3813	41.8091	56.7627	72.0215
144.2	-21.0571	-12.8174	-7.32422	-2.44141	2.74658	10.376	18.6157	28.3813	41.1987	57.0679	72.0215
144.3	-21.0571	-12.5122	-7.01904	-2.13623	2.44141	10.0708	19.5312	28.6865	40.5884	57.373	72.0215
144.4	-21.0571	-12.5122	-7.01904	-1.83105	2.44141	10.0708	20.1416	29.2969	40.5884	57.0679	72.3267
144.5	-20.752	-12.8174	-7.01904	-1.83105	2.74658	10.0708	20.4468	29.6021	40.8936	56.4575	72.937
144.6	-20.752	-13.4277	-7.32422	-2.13623	3.05176	10.0708	20.4468	30.2124	41.1987	56.4575	73.2422
144.7	-21.0571	-13.7329	-7.62939	-2.44141	3.35693	10.0708	20.1416	30.2124	41.8091	56.4575	72.937
144.8	-20.752	-14.3433	-8.23975	-2.44141	3.66211	10.0708	19.8364	30.2124	42.4194	56.1523	72.937
144.9	-20.752	-14.3433	-8.54492	-2.44141	4.27246	10.0708	19.2261	29.9072	42.7246	55.542	72.6318
145	-20.752	-14.3433	-8.8501	-2.44141	4.27246	10.376	19.2261	29.2969	42.4194	54.9316	72.3267
145.1	-20.752	-14.0381	-8.54492	-2.13623	3.66211	10.6812	19.2261	28.6865	42.1143	54.9316	71.7163
145.2	-20.752	-14.3433	-8.23975	-1.83105	2.74658	11.2915	18.9209	28.0762	41.8091	55.2368	71.7163
145.3	-21.0571	-14.6484	-8.23975	-1.2207	2.13623	11.5967	18.6157	27.771	41.8091	55.2368	72.0215
145.4	-20.752	-14.9536	-7.93457	-1.2207	2.13623	11.5967	18.6157	27.771	42.1143	55.8472	72.6318
145.5	-19.8364	-14.9536	-7.62939	-1.2207	2.13623	10.9863	18.3105	28.0762	42.1143	56.4575	72.937
145.6	-19.2261	-14.9536	-7.62939	-1.83105	2.44141	10.376	18.3105	28.6865	42.1143	56.4575	72.6318
145.7	-19.2261	-14.9536	-7.62939	-2.44141	2.74658	10.0708	18.3105	29.2969	42.4194	56.4575	72.3267
145.8	-19.5312	-14.3433	-7.93457	-2.74658	3.66211	9.46045	18.3105	29.9072	42.4194	56.1523	72.3267
145.9	-20.1416	-13.7329	-8.23975	-3.35693	4.27246	9.15527	18.6157	30.2124	42.4194	55.8472	72.3267
146	-20.752	-13.4277	-8.54492	-3.96729	4.27246	9.15527	18.9209	30.2124	42.4194	56.1523	72.3267
146.1	-21.0571	-13.4277	-8.8501	-4.27246	3.66211	9.46045	19.5312	29.9072	42.1143	56.1523	72.3267
146.2	-21.0571	-13.7329	-8.8501	-4.27246	3.05176	10.376	19.5312	29.2969	41.8091	56.1523	72.6318
146.3	-20.1416	-14.0381	-9.15527	-3.96729	2.13623	10.6812	19.2261	28.9917	41.5039	56.7627	72.937
146.4	-19.5312	-14.3433	-9.46045	-3.66211	1.83105	10.9863	18.9209	28.0762	41.8091	57.373	73.2422
146.5	-19.2261	-14.6484	-9.15527	-3.66211	1.83105	10.6812	18.0054	27.4658	41.8091	57.6782	73.2422
146.6	-19.2261	-14.6484	-8.54492	-3.35693	1.83105	10.376	17.395	27.771	42.1143	57.6782	72.937
146.7	-19.5312	-14.9536	-7.93457	-3.05176	1.83105	9.76563	17.7002	28.6865	42.4194	57.373	72.3267
146.8	-19.8364	-14.6484	-7.32422	-2.44141	1.83105	9.76563	18.6157	29.2969	42.7246	57.0679	72.0215
146.9	-20.1416	-14.0381	-7.32422	-1.83105	1.83105	10.0708	19.5312	29.6021	43.0298	56.7627	71.7163
147	-20.4468	-13.7329	-7.32422	-1.83105	2.13623	10.376	20.1416	29.2969	43.0298	57.0679	71.7163
147.1	-20.752	-14.0381	-7.62939	-1.83105	3.05176	10.6812	20.4468	28.9917	43.0298	57.373	72.0215
147.2	-20.752	-14.0381	-8.23975	-1.83105	3.66211	11.2915	20.1416	28.6865	43.0298	57.373	72.3267
147.3	-20.4468	-14.6484	-7.93457	-1.52588	3.66211	11.5967	19.2261	28.6865	43.335	57.373	72.937
147.4	-20.752	-14.3433	-7.32422	-1.52588	3.96729	11.9019	18.9209	28.9917	43.6401	57.373	73.2422
147.5	-21.0571	-14.0381	-6.71387	-1.52588	4.27246	11.9019	18.6157	28.9917	43.9453	57.6782	73.5474
147.6	-20.4468	-13.7329	-6.71387	-1.83105	4.57764	11.5967	18.6157	28.3813	43.9453	57.9834	73.5474
147.7	-19.8364	-13.4277	-7.01904	-2.44141	4.57764	10.9863	18.9209	27.771	43.335	57.9834	73.5474
147.8	-19.2261	-13.4277	-7.32422	-2.44141	3.96729	10.6812	18.9209	27.1606	42.1143	57.6782	73.2422
147.9	-19.2261	-13.4277	-7.93457	-2.13623	3.35693	10.6812	19.5312	27.1606	41.1987	57.373	72.937
148	-19.5312	-13.7329	-7.93457	-1.83105	3.05176	10.6812	19.5312	28.0762	40.2832	56.7627	72.6318
148.1	-19.8364	-13.7329	-8.23975	-2.13623	3.35693	10.6812	19.2261	28.6865	40.2832	55.8472	72.6318
148.2	-20.4468	-13.7329	-8.23975	-2.74658	3.66211	10.6812	18.9209	29.6021	40.5884	55.2368	72.937
148.3	-21.0571	-13.1226	-8.23975	-3.05176	3.96729	10.376	18.9209	29.6021	41.5039	55.542	73.2422
148.4	-21.3623	-12.8174	-8.23975	-3.35693	3.96729	10.376	19.2261	29.6021	41.8091	55.8472	72.937
148.5	-21.3623	-12.5122	-8.23975	-3.35693	3.96729	10.0708	18.9209	29.2969	42.1143	56.4575	72.6318
148.6	-20.752	-12.8174	-8.23975	-3.35693	3.66211	10.0708	18.9209	29.2969	42.1143	56.7627	72.3267
148.7	-20.1416	-13.4277	-8.23975	-3.05176	3.35693	10.0708	19.2261	29.6021	42.4194	56.4575	72.0215
148.8	-19.8364	-14.0381	-8.23975	-2.74658	3.96729	10.376	20.1416	29.9072	42.4194	56.4575	71.4111
148.9	-20.1416	-14.6484	-8.54492	-3.05176	4.27246	10.6812	20.752	30.2124	42.7246	56.4575	71.106
149	-20.752	-14.6484	-8.8501	-3.66211	4.57764	10.6812	21.6675	29.9072	42.7246	56.4575	71.4111
149.1	-21.0571	-14.0381	-9.15527	-3.66211	4.27246	10.376	21.6675	29.6021	42.7246	56.4575	71.4111
149.2	-21.0571	-13.4277	-9.15527	-3.35693	3.96729	10.0708	20.752	28.9917	42.1143	56.7627	71.7163
149.3	-20.4468	-12.8174	-9.15527	-2.44141	3.66211	10.0708	19.8364	28.9917	41.8091	57.0679	72.0215
149.4	-20.4468	-12.8174	-9.15527	-1.52588	3.66211	10.0708	19.2261	28.9917	41.5039	57.0679	72.3267
149.5	-20.4468	-13.1226	-8.8501	-1.2207	3.66211	10.376	18.6157	28.9917	41.8091	57.0679	72.6318
149.6	-20.752	-13.1226	-8.8501	-1.2207	3.35693	10.6812	18.3105	28.9917	42.4194	57.0679	72.937
149.7	-20.4468	-13.1226	-8.54492	-1.2207	3.35693	10.9863	18.0054	28.3813	42.7246	56.7627	73.2422
149.8	-20.1416	-12.8174	-7.93457	-1.2207	3.05176	10.6812	18.3105	28.3813	43.0298	56.4575	73.5474
149.9	-19.8364	-12.8174	-7.32422	-1.52588	2.44141	10.0708	18.3105	28.3813	42.7246	56.1523	73.5474
150	-19.2261	-12.8174	-6.71387	-2.44141	2.44141	9.76563	18.9209	28.9917	42.4194	55.542	73.5474
150.1	-19.5312	-12.5122	-6.71387	-3.35693	2.74658	9.76563	19.2261	29.2969	41.8091	55.2368	73.5474
150.2	-19.5312	-12.8174	-7.01904	-3.96729	3.05176	10.0708	18.9209	29.2969	41.5039	55.2368	73.5474
150.3	-19.5312	-12.8174	-7.62939	-3.96729	3.35693	10.376	18.9209	29.2969	41.5039	55.8472	73.5474
150.4	-19.8364	-13.1226	-7.93457	-3.35693	3.35693	10.6812	18.6157	29.2969	41.1987	56.7627	73.5474
150.5	-20.1416	-13.4277	-7.62939	-2.44141	3.35693	10.9863	18.9209	29.2969	41.5039	57.0679	73.8525
150.6	-20.4468	-13.7329	-7.01904	-1.83105	3.35693	10.6812	18.9209	29.9072	41.8091	57.373	74.1577
150.7	-20.1416	-14.0381	-7.01904	-1.2207	3.66211	10.376	18.9209	30.2124	42.1143	57.373	74.4629
150.8	-19.8364	-14.3433	-7.32422	-1.2207	3.66211	10.376	19.2261	30.5176	41.5039	57.6782	74.4629
150.9	-19.5312	-14.3433	-7.93457	-1.2207	3.35693	10.6812	19.5312	30.2124	40.8936	57.6782	73.5474
151	-19.2261	-14.0381	-7.93457	-1.2207	3.35693	11.2915	19.8364	29.9072	40.5884	57.9834	72.937
151.1	-18.9209	-13.7329	-7.93457	-0.915527	3.66211	11.5967	20.1416	29.9072	40.8936	57.9834	72.6318
151.2	-18.6157	-13.7329	-7.93457	-0.915527	4.57764	11.5967	20.1416	29.9072	41.1987	57.6782	72.937
151.3	-18.6157	-13.7329	-7.93457	-1.52588	4.88281	11.2915	19.8364	29.2969	41.1987	57.373	73.5474
151.4	-18.9209	-14.0381	-7.62939	-1.83105	4.57764	10.6812	19.2261	28.3813	41.5039	56.7627	73.2422
151.5	-19.2261	-14.0381	-7.62939	-2.13623	4.27246	10.376	18.9209	28.0762	41.5039	56.1523	72.937
151.6	-19.8364	-14.0381	-7.62939	-2.44141	3.96729	10.6812	18.3105	28.3813	41.5039	56.1523	72.6318
151.7	-20.1416	-14.0381	-7.32422	-3.05176	3.35693	10.6812	17.395	28.3813	41.8091	56.1523	72.937
151.8	-19.8364	-14.0381	-7.01904	-3.35693	3.05176	10.9863	17.395	28.6865	42.1143	56.1523	73.2422
151.9	-19.8364	-14.0381	-6.71387	-3.05176	2.74658	10.9863	18.0054	28.9917	42.7246	56.1523	73.5474
152	-19.8364	-13.4277	-7.01904	-2.44141	2.74658	10.9863	18.9209	29.2969	43.0298	55.8472	73.2422
152.1	-20.1416	-13.4277	-7.32422	-2.13623	3.05176	10.6812	19.8364	29.6021	43.0298	55.542	72.937
152.2	-20.1416	-13.4277	-7.62939	-2.13623	3.35693	10.6812	20.4468	29.2969	42.7246	55.2368	72.6318
152.3	-19.5312	-13.4277	-7.62939	-2.13623	3.96729	10.376	20.4468	29.6021	42.1143	54.9316	72.6318
152.4	-19.2261	-13.1226	-7.93457	-2.13623	4.27246	10.0708	20.4468	29.6021	41.5039	54.9316	73.2422
152.5	-19.2261	-12.8174	-8.54492	-2.13623	4.88281	10.376	20.752	29.9072	41.8091	55.542	73.8525
152.6	-19.5312	-12.8174	-8.8501	-2.44141	4.88281	10.376	20.752	29.9072	42.1143	56.1523	74.7681
152.7	-19.8364	-12.5122	-8.8501	-2.74658	4.88281	10.6812	20.752	29.6021	42.4194	56.4575	75.3784
152.8	-20.1416	-12.207	-8.54492	-2.44141	4.27246	11.2915	21.0571	28.9917	42.7246	56.1523	75.6836
152.9	-20.4468	-12.5122	-8.23975	-2.44141	3.66211	11.5967	21.0571	28.6865	42.4194	55.8472	75.9888
153	-20.4468	-13.1226	-8.23975	-2.13623	3.05176	11.5967	20.752	28.0762	42.1143	55.542	75.9888
153.1	-20.1416	-13.4277	-8.54492	-1.83105	2.44141	11.2915	20.4468	28.0762	41.8091	55.542	75.9888
153.2	-20.4468	-13.4277	-8.54492	-1.52588	2.13623	10.6812	19.8364	27.771	41.5039	56.1523	75.9888
153.3	-20.752	-12.8174	-8.8501	-1.52588	1.83105	10.0708	19.2261	27.771	41.5039	56.7627	75.9888
153.4	-21.0571	-12.5122	-8.54492	-1.52588	2.44141	9.46045	18.9209	28.0762	41.5039	57.373	75.6836
153.5	-20.752	-11.9019	-7.93457	-1.83105	3.05176	9.15527	18.9209	28.6865	41.1987	57.373	75.0732
153.6	-20.1416	-11.5967	-7.32422	-1.83105	3.96729	9.15527	19.2261	29.2969	41.5039	57.373	74.1577
153.7	-19.2261	-12.207	-7.01904	-2.13623	4.27246	9.15527	19.2261	29.2969	41.8091	57.373	73.2422
153.8	-18.9209	-12.8174	-7.32422	-2.74658	4.88281	9.76563	19.2261	29.2969	41.8091	57.0679	72.937
153.9	-19.2261	-13.4277	-7.62939	-3.05176	4.88281	10.376	19.2261	28.9917	41.5039	56.7627	72.937
154	-19.5312	-14.0381	-8.23975	-3.05176	4.88281	10.9863	19.2261	28.9917	41.5039	56.4575	72.6318
154.1	-19.5312	-14.9536	-8.54492	-2.74658	4.27246	10.9863	19.2261	28.9917	41.5039	56.1523	73.2422
154.2	-19.2261	-15.2588	-8.54492	-2.74658	3.35693	10.6812	18.9209	28.6865	41.5039	56.4575	73.8525
154.3	-19.2261	-14.6484	-8.23975	-3.05176	2.74658	10.376	18.6157	28.6865	41.8091	57.0679	74.1577
154.4	-18.9209	-13.7329	-8.23975	-3.05176	2.44141	10.0708	18.3105	28.9917	42.4194	57.0679	74.1577
154.5	-18.6157	-12.8174	-8.23975	-2.74658	2.44141	9.76563	18.0054	29.6021	43.0298	56.7627	74.1577
154.6	-18.6157	-12.5122	-8.23975	-2.44141	2.74658	9.46045	18.0054	30.2124	42.4194	56.4575	73.8525
154.7	-19.2261	-12.8174	-8.23975	-2.13623	3.05176	9.46045	18.6157	30.5176	42.1143	56.7627	73.8525
154.8	-19.5312	-13.1226	-8.23975	-1.83105	3.05176	10.0708	19.5312	30.5176	42.1143	56.7627	73.2422
154.9	-19.8364	-12.8174	-7.93457	-2.13623	2.74658	11.2915	19.8364	29.9072	42.4194	56.7627	72.6318
155	-19.5312	-12.8174	-8.23975	-2.44141	3.35693	11.2915	19.8364	29.6021	42.7246	56.7627	72.0215
155.1	-19.5312	-13.1226	-8.54492	-2.13623	3.66211	10.6812	19.8364	29.2969	42.7246	56.4575	72.0215
155.2	-19.5312	-13.4277	-8.8501	-1.52588	3.35693	10.0708	19.8364	28.6865	42.4194	56.1523	72.3267
155.3	-19.8364	-13.4277	-8.23975	-1.52588	3.35693	9.76563	19.8364	28.6865	42.1143	55.8472	72.6318
155.4	-19.8364	-12.5122	-7.62939	-2.13623	3.66211	9.76563	19.5312	28.9917	41.8091	56.1523	73.2422
155.5	-19.5312	-11.9019	-7.93457	-2.74658	4.27246	9.76563	19.2261	29.6021	41.5039	56.7627	73.5474
155.6	-18.3105	-12.207	-7.93457	-3.05176	4.27246	10.376	18.9209	29.9072	41.1987	57.373	73.8525
155.7	-18.0054	-12.8174	-7.62939	-3.05176	4.27246	10.6812	18.6157	29.9072	40.8936	57.9834	74.1577
155.8	-18.9209	-13.4277	-7.62939	-3.05176	3.66211	10.6812	18.3105	29.6021	41.1987	57.6782	74.4629
155.9	-19.8364	-13.7329	-7.62939	-2.44141	3.35693	10.6812	18.3105	28.9917	41.5039	57.0679	74.7681
156	-20.1416	-13.4277	-7.93457	-2.13623	3.35693	10.9863	18.6157	28.9917	41.5039	56.4575	75.0732
156.1	-19.8364	-13.7329	-8.54492	-2.44141	3.35693	11.2915	19.2261	29.2969	41.5039	56.1523	74.7681
156.2	-19.2261	-14.0381	-9.15527	-2.74658	3.35693	10.9863	19.5312	29.9072	41.5039	56.1523	74.1577
156.3	-19.2261	-14.6484	-9.15527	-2.74658	3.66211	10.9863	19.5312	30.5176	41.8091	56.4575	73.5474
156.4	-19.2261	-15.2588	-8.8501	-2.44141	4.27246	10.6812	19.5312	30.8228	42.1143	56.7627	73.2422
156.5	-19.5312	-14.9536	-8.23975	-2.13623	4.57764	10.6812	19.5312	30.5176	42.1143	56.7627	72.937
156.6	-19.8364	-14.6484	-7.93457	-1.52588	4.27246	10.9863	19.5312	29.2969	42.4194	57.0679	72.937
156.7	-19.8364	-14.0381	-7.93457	-1.2207	3.35693	10.6812	19.5312	28.0762	41.8091	57.373	72.937
156.8	-19.5312	-14.0381	-7.93457	-1.52588	2.74658	10.6812	19.5312	27.771	41.8091	57.373	73.5474
156.9	-19.5312	-14.0381	-8.23975	-2.13623	2.13623	10.9863	19.2261	28.0762	41.8091	56.7627	73.8525
157	-19.2261	-13.7329	-8.23975	-2.74658	2.13623	10.376	19.2261	28.6865	42.1143	56.4575	73.8525
157.1	-19.5312	-13.4277	-8.23975	-3.05176	2.44141	10.0708	19.5312	28.9917	42.4194	56.4575	74.1577
157.2	-20.1416	-13.7329	-8.54492	-3.05176	3.05176	9.76563	20.1416	28.9917	42.4194	56.7627	73.8525
157.3	-20.1416	-14.0381	-8.54492	-2.74658	3.66211	9.76563	20.1416	28.6865	42.1143	56.7627	73.8525
157.4	-20.1416	-14.0381	-8.54492	-2.44141	3.66211	9.76563	19.8364	28.6865	41.5039	56.7627	74.1577
157.5	-19.5312	-14.0381	-8.23975	-2.13623	3.35693	9.76563	20.1416	28.6865	40.8936	56.4575	74.1577
157.6	-19.5312	-13.7329	-7.62939	-2.13623	2.74658	9.76563	20.4468	28.9917	40.8936	56.1523	73.8525
157.7	-19.5312	-13.1226	-7.01904	-2.44141	2.74658	9.76563	20.4468	29.2969	40.8936	55.8472	73.5474
157.8	-19.5312	-12.8174	-7.01904	-2.74658	3.05176	9.76563	20.1416	29.6021	41.5039	56.1523	73.2422
157.9	-19.8364	-12.5122	-7.62939	-2.44141	3.05176	9.76563	19.8364	29.2969	41.8091	56.7627	72.937
158	-19.8364	-12.5122	-7.93457	-2.44141	3.05176	9.76563	19.2261	28.9917	42.1143	56.7627	72.937
158.1	-19.8364	-12.5122	-8.23975	-2.13623	3.05176	10.0708	18.9209	28.9917	42.4194	57.0679	73.8525
158.2	-20.1416	-12.8174	-8.23975	-2.13623	3.35693	10.376	18.6157	28.9917	42.4194	57.373	74.4629
158.3	-20.4468	-13.1226	-8.23975	-1.83105	3.35693	10.6812	18.3105	28.9917	42.1143	57.0679	75.0732
158.4	-20.4468	-13.7329	-8.54492	-1.83105	3.35693	10.9863	18.0054	28.9917	41.5039	56.7627	75.0732
158.5	-20.752	-14.3433	-8.54492	-1.83105	3.05176	10.9863	18.0054	28.6865	41.1987	56.7627	74.7681
158.6	-20.752	-14.6484	-8.23975	-2.44141	2.74658	10.9863	18.3105	28.3813	41.5039	56.4575	74.4629
158.7	-20.752	-14.3433	-7.93457	-3.05176	2.44141	10.9863	18.6157	28.3813	42.1143	56.4575	74.4629
158.8	-20.4468	-13.7329	-8.23975	-3.66211	2.44141	10.9863	19.2261	28.6865	42.7246	56.1523	74.7681
158.9	-20.1416	-13.1226	-8.23975	-3.66211	3.05176	10.6812	19.5312	29.2969	42.7246	56.7627	74.7681
159	-20.1416	-13.4277	-8.23975	-3.35693	3.35693	10.376	19.5312	29.2969	42.1143	57.0679	75.0732
159.1	-19.8364	-13.7329	-8.23975	-3.35693	3.35693	9.76563	19.5312	29.2969	41.8091	57.373	74.7681
159.2	-19.5312	-13.7329	-7.93457	-3.05176	3.35693	9.15527	19.2261	28.9917	41.8091	57.373	74.7681
159.3	-19.2261	-13.4277	-7.93457	-2.74658	3.35693	8.54492	19.2261	28.9917	41.8091	57.0679	74.7681
159.4	-18.9209	-13.4277	-8.23975	-2.44141	3.66211	7.93457	19.2261	28.6865	42.1143	56.7627	74.4629
159.5	-19.2261	-13.4277	-8.54492	-1.83105	3.66211	8.23975	19.5312	28.6865	42.7246	56.7627	74.4629
159.6	-19.8364	-13.7329	-8.8501	-1.52588	3.66211	9.15527	19.8364	28.6865	42.7246	56.4575	74.4629
159.7	-20.4468	-13.7329	-8.8501	-1.2207	3.66211	9.76563	20.1416	29.2969	42.7246	56.1523	74.1577
159.8	-20.4468	-13.7329	-8.8501	-1.52588	3.66211	10.0708	20.4468	29.9072	42.7246	56.1523	74.1577
159.9	-19.8364	-13.7329	-8.54492	-2.44141	3.35693	9.76563	20.4468	30.2124	42.4194	55.8472	73.8525
160	-19.2261	-14.0381	-8.54492	-2.74658	3.35693	9.76563	20.1416	30.2124	42.4194	55.8472	73.5474
160.1	-18.9209	-14.3433	-8.23975	-3.35693	3.05176	10.0708	20.1416	29.6021	42.1143	55.8472	73.2422
160.2	-18.9209	-14.3433	-7.93457	-3.05176	3.05176	10.376	19.8364	29.2969	42.1143	56.1523	73.2422
160.3	-19.2261	-14.0381	-7.93457	-2.74658	3.35693	10.6812	19.5312	28.9917	41.8091	55.8472	73.2422
160.4	-19.8364	-13.7329	-8.23975	-2.13623	3.35693	10.6812	19.5312	28.9917	42.1143	56.1523	72.937
160.5	-20.4468	-13.7329	-8.54492	-1.52588	3.35693	10.6812	19.2261	28.9917	42.1143	56.1523	73.2422
160.6	-20.752	-14.0381	-8.23975	-1.2207	3.05176	10.9863	19.2261	28.9917	42.1143	56.4575	73.5474
160.7	-21.3623	-14.0381	-7.93457	-1.2207	2.74658	10.9863	18.9209	29.2969	42.4194	56.7627	74.1577
160.8	-21.6675	-14.3433	-7.32422	-1.83105	2.44141	11.2915	18.9209	29.2969	42.4194	56.7627	75.0732
160.9	-21.9727	-14.6484	-7.32422	-2.74658	2.13623	11.2915	18.6157	29.2969	42.4194	56.4575	75.3784
161	-21.6675	-14.9536	-7.93457	-3.05176	2.13623	10.9863	18.3105	29.2969	42.1143	56.1523	75.3784
161.1	-21.0571	-14.3433	-8.23975	-3.05176	1.83105	10.376	18.0054	29.2969	42.1143	56.1523	74.7681
161.2	-20.752	-13.7329	-8.54492	-3.05176	1.83105	9.76563	18.3105	28.6865	41.5039	56.7627	74.4629
161.3	-20.4468	-13.4277	-8.8501	-3.05176	2.44141	9.15527	18.9209	28.3813	41.1987	57.0679	74.4629
161.4	-20.1416	-13.7329	-8.8501	-3.05176	3.05176	9.15527	19.2261	27.771	40.8936	57.373	73.8525
161.5	-20.1416	-14.0381	-8.8501	-2.74658	3.96729	9.46045	19.2261	28.0762	41.1987	57.0679	73.2422
161.6	-19.8364	-14.6484	-8.8501	-2.74658	4.27246	10.376	19.2261	28.3813	41.5039	56.7627	72.937
161.7	-19.8364	-14.3433	-8.8501	-2.44141	4.27246	10.6812	19.2261	29.2969	41.8091	56.7627	73.2422
161.8	-20.1416	-14.0381	-8.8501	-2.44141	4.27246	10.6812	19.2261	29.9072	41.8091	57.0679	73.5474
161.9	-20.752	-13.1226	-8.54492	-2.13623	3.96729	10.6812	18.9209	29.9072	41.8091	57.373	73.2422
162	-21.0571	-12.5122	-7.93457	-2.13623	3.66211	10.0708	18.9209	30.2124	41.8091	57.6782	72.937
162.1	-21.0571	-12.5122	-7.62939	-2.13623	3.66211	9.46045	18.9209	30.2124	41.5039	57.9834	73.2422
162.2	-21.0571	-12.5122	-7.32422	-2.44141	3.35693	8.8501	19.2261	29.9072	40.8936	57.9834	73.2422
162.3	-21.0571	-12.8174	-7.62939	-2.44141	3.05176	9.15527	19.5312	29.2969	41.1987	58.2886	73.2422
162.4	-20.752	-13.1226	-7.93457	-2.74658	3.05176	9.15527	19.2261	28.6865	41.8091	58.5937	73.2422
162.5	-20.1416	-13.1226	-8.23975	-3.05176	3.35693	9.15527	18.6157	28.3813	42.4194	58.5937	73.5474
162.6	-19.8364	-13.7329	-8.23975	-3.05176	3.66211	9.46045	18.3105	28.3813	42.7246	58.2886	73.5474
162.7	-19.8364	-14.0381	-7.62939	-2.74658	3.66211	10.376	18.0054	28.6865	42.4194	57.9834	72.937
162.8	-20.1416	-14.3433	-7.01904	-2.44141	3.35693	10.9863	18.3105	28.9917	42.4194	57.373	72.937
162.9	-20.1416	-14.0381	-6.71387	-2.44141	2.74658	11.2915	18.6157	29.2969	41.8091	57.6782	73.2422
163	-19.8364	-13.7329	-6.71387	-2.74658	2.74658	11.2915	19.2261	28.9917	41.1987	57.9834	73.8525
163.1	-19.5312	-13.7329	-7.32422	-2.74658	3.05176	10.6812	19.2261	28.9917	41.1987	58.2886	73.8525
163.2	-19.2261	-13.7329	-8.23975	-2.44141	2.74658	10.376	18.9209	28.9917	41.5039	57.9834	73.8525
163.3	-19.5312	-13.7329	-9.15527	-2.13623	2.13623	10.376	18.3105	29.6021	41.8091	57.373	73.8525
163.4	-19.8364	-13.1226	-9.76562	-2.13623	1.2207	9.76563	18.0054	30.2124	41.8091	56.7627	74.1577
163.5	-20.1416	-12.8174	-10.0708	-2.13623	1.2207	9.76563	18.3105	30.2124	41.8091	56.1523	74.4629
163.6	-20.1416	-13.1226	-9.76562	-2.44141	1.52588	10.376	18.6157	29.6021	41.8091	55.8472	74.4629
163.7	-20.1416	-13.1226	-9.46045	-3.05176	2.44141	10.9863	19.2261	28.3813	41.5039	55.8472	74.4629
163.8	-20.1416	-13.4277	-8.8501	-3.05176	3.35693	11.5967	19.5312	27.1606	41.5039	56.1523	74.4629
163.9	-20.4468	-13.7329	-7.93457	-2.74658	3.96729	11.9019	19.2261	26.8555	41.5039	56.4575	74.7681
164	-20.4468	-14.0381	-7.01904	-3.05176	3.66211	11.9019	18.9209	27.4658	41.5039	56.7627	74.7681
164.1	-20.752	-14.0381	-6.71387	-2.74658	3.66211	11.5967	18.6157	28.3813	41.8091	57.0679	74.7681
164.2	-21.0571	-13.7329	-6.71387	-2.44141	3.35693	11.5967	18.6157	29.2969	42.4194	57.373	74.4629
164.3	-21.0571	-13.4277	-7.01904	-2.13623	3.05176	11.2915	18.9209	29.2969	42.7246	57.6782	74.1577
164.4	-20.752	-13.4277	-7.32422	-1.83105	2.44141	10.9863	18.9209	29.2969	43.0298	57.9834	74.1577
164.5	-20.1416	-13.1226	-7.32422	-1.83105	2.13623	10.6812	18.9209	29.6021	43.0298	57.6782	74.1577
164.6	-19.5312	-13.4277	-7.32422	-2.13623	2.44141	10.376	18.9209	29.6021	43.0298	57.373	73.8525
164.7	-18.9209	-13.7329	-6.71387	-2.13623	2.74658	10.6812	18.9209	29.6021	43.0298	56.4575	73.2422
164.8	-18.9209	-14.0381	-6.71387	-1.83105	3.05176	10.6812	18.6157	29.6021	42.4194	56.4575	72.6318
164.9	-18.9209	-14.0381	-7.32422	-1.52588	3.35693	10.6812	18.3105	29.9072	42.1143	56.4575	72.0215
165	-19.2261	-13.7329	-7.62939	-1.52588	3.66211	10.376	18.3105	29.9072	42.1143	56.7627	71.4111
165.1	-19.5312	-14.0381	-7.93457	-1.83105	3.35693	10.0708	18.3105	29.9072	42.1143	57.0679	71.106
165.2	-19.8364	-14.0381	-8.54492	-1.83105	3.35693	10.0708	18.6157	29.2969	41.8091	57.0679	71.7163
165.3	-19.8364	-13.7329	-9.15527	-1.83105	3.96729	10.0708	18.9209	28.6865	42.1143	57.0679	72.0215
165.4	-19.5312	-13.7329	-9.46045	-1.52588	4.57764	10.0708	18.9209	28.3813	42.4194	57.373	72.6318
165.5	-19.5312	-14.3433	-9.15527	-1.52588	4.88281	10.0708	19.5312	28.6865	42.4194	57.373	73.2422
165.6	-19.2261	-14.6484	-8.23975	-1.52588	4.57764	10.376	19.8364	29.6021	42.4194	57.373	73.8525
165.7	-19.2261	-14.9536	-7.01904	-1.83105	4.27246	10.9863	19.8364	30.5176	42.4194	57.0679	73.8525
165.8	-19.2261	-14.6484	-6.40869	-2.13623	3.66211	10.9863	19.5312	30.5176	42.4194	56.7627	73.5474
165.9	-19.8364	-14.0381	-6.71387	-2.44141	3.05176	10.9863	18.9209	30.2124	42.1143	56.7627	73.5474
166	-20.1416	-13.4277	-7.62939	-2.74658	2.44141	10.376	18.3105	29.6021	41.8091	57.373	73.8525
166.1	-20.1416	-13.4277	-8.54492	-3.05176	2.13623	10.0708	18.3105	28.6865	41.8091	57.9834	73.8525
166.2	-19.8364	-13.1226	-8.8501	-3.05176	2.13623	10.0708	18.6157	28.0762	42.1143	58.2886	74.1577
166.3	-19.5312	-13.1226	-8.54492	-3.05176	2.74658	10.376	19.2261	28.0762	42.4194	58.2886	74.1577
166.4	-19.5312	-12.8174	-8.54492	-2.74658	3.35693	10.6812	20.1416	28.6865	42.7246	57.373	74.4629
166.5	-19.5312	-13.1226	-8.23975	-2.44141	3.66211	10.6812	20.4468	29.6021	43.0298	56.4575	74.4629
166.6	-19.5312	-13.1226	-8.54492	-1.83105	3.35693	9.76563	20.1416	29.9072	42.7246	55.8472	74.1577
166.7	-19.5312	-13.1226	-8.8501	-1.2207	2.74658	8.8501	19.5312	29.9072	42.1143	55.8472	73.5474
166.8	-19.5312	-12.8174	-8.8501	-1.52588	2.74658	8.8501	18.9209	29.6021	41.8091	56.4575	72.937
166.9	-19.2261	-12.5122	-8.54492	-2.13623	3.05176	9.15527	18.9209	29.6021	41.8091	57.0679	72.6318
167	-19.2261	-12.207	-8.23975	-3.05176	3.35693	10.0708	19.2261	29.6021	41.8091	57.6782	72.6318
167.1	-19.2261	-12.207	-8.23975	-3.96729	3.35693	11.2915	19.5312	29.2969	42.1143	57.6782	72.6318
167.2	-19.5312	-12.5122	-8.23975	-4.27246	3.35693	11.5967	19.8364	28.9917	42.1143	57.9834	72.6318
167.3	-19.8364	-13.1226	-8.23975	-3.66211	3.35693	11.2915	20.1416	28.3813	42.4194	57.6782	72.6318
167.4	-19.8364	-13.4277	-7.93457	-2.74658	3.35693	11.2915	20.4468	28.0762	42.1143	57.373	72.3267
167.5	-19.5312	-13.1226	-7.62939	-1.83105	3.35693	10.9863	20.752	28.0762	42.4194	57.373	72.0215
167.6	-18.9209	-13.1226	-7.32422	-0.915527	3.35693	10.9863	20.4468	28.3813	42.4194	57.373	72.0215
167.7	-18.6157	-13.4277	-7.62939	-0.610352	3.05176	10.6812	20.1416	28.3813	42.1143	57.6782	72.0215
167.8	-18.9209	-13.7329	-7.62939	-0.915527	3.05176	10.6812	19.2261	28.6865	42.1143	57.373	72.3267
167.9	-19.5312	-13.7329	-7.62939	-1.52588	2.74658	10.0708	18.9209	28.6865	42.4194	57.0679	72.6318
168	-20.1416	-13.7329	-7.62939	-2.13623	2.74658	9.15527	19.2261	28.6865	42.7246	57.0679	72.6318
168.1	-20.4468	-13.4277	-7.62939	-2.44141	2.74658	8.8501	19.5312	28.9917	42.7246	57.0679	72.3267
168.2	-20.4468	-13.1226	-7.93457	-2.13623	3.05176	9.15527	19.5312	29.6021	42.7246	57.0679	72.3267
168.3	-20.1416	-13.1226	-8.23975	-2.13623	3.66211	9.76563	18.9209	29.9072	42.7246	56.7627	72.3267
168.4	-19.8364	-13.4277	-8.54492	-2.13623	4.27246	10.9863	18.6157	29.9072	43.0298	56.1523	72.3267
168.5	-19.8364	-13.7329	-8.54492	-2.44141	4.57764	11.5967	18.6157	29.2969	43.0298	55.8472	72.3267
168.6	-19.8364	-14.0381	-8.54492	-2.74658	4.88281	12.207	18.9209	28.9917	42.7246	56.1523	72.0215
168.7	-19.5312	-14.0381	-8.23975	-2.74658	4.57764	12.207	19.5312	28.3813	42.4194	56.7627	72.0215
168.8	-19.5312	-13.4277	-7.93457	-2.74658	3.96729	11.9019	19.8364	28.3813	42.4194	57.0679	72.0215
168.9	-19.5312	-12.8174	-7.93457	-2.44141	3.35693	11.2915	20.1416	28.6865	42.4194	57.0679	72.0215
169	-19.8364	-12.5122	-7.62939	-2.13623	3.05176	10.6812	19.8364	29.2969	42.7246	57.0679	72.3267
169.1	-20.4468	-12.207	-7.32422	-1.83105	3.35693	10.376	19.5312	30.2124	43.0298	56.7627	72.3267
169.2	-20.4468	-12.5122	-7.32422	-1.52588	3.35693	10.0708	19.5312	30.5176	43.335	56.4575	72.3267
169.3	-19.8364	-12.8174	-7.62939	-1.83105	3.35693	9.76563	19.5312	30.2124	43.335	56.4575	72.3267
169.4	-19.2261	-13.1226	-7.93457	-2.13623	3.66211	9.76563	20.1416	29.6021	43.0298	56.4575	72.6318
169.5	-18.9209	-13.4277	-8.23975	-2.44141	3.66211	9.46045	20.752	29.2969	42.4194	56.1523	72.937
169.6	-18.9209	-13.1226	-8.54492	-2.44141	3.66211	9.76563	20.752	29.6021	41.8091	56.1523	73.8525
169.7	-19.2261	-12.8174	-8.23975	-2.44141	3.66211	10.0708	20.1416	30.2124	41.5039	56.1523	74.7681
169.8	-19.2261	-13.1226	-8.23975	-2.44141	3.66211	10.376	19.2261	30.2124	41.8091	56.7627	75.3784
169.9	-19.8364	-13.4277	-7.62939	-3.05176	3.66211	10.376	18.9209	29.6021	42.1143	57.0679	75.6836
170	-19.8364	-14.0381	-7.32422	-3.66211	3.66211	10.0708	18.9209	29.2969	42.4194	57.0679	75.3784
170.1	-19.8364	-14.3433	-7.32422	-3.96729	3.66211	10.6812	18.9209	29.6021	42.7246	56.7627	75.0732
170.2	-19.8364	-13.7329	-7.32422	-3.66211	3.66211	11.2915	18.9209	30.2124	42.7246	56.4575	74.7681
170.3	-19.5312	-13.4277	-7.62939	-3.35693	3.66211	11.5967	19.2261	30.5176	42.7246	55.8472	74.7681
170.4	-19.2261	-12.8174	-7.93457	-2.44141	3.66211	11.9019	19.5312	30.2124	42.7246	55.542	75.0732
170.5	-19.2261	-12.8174	-8.23975	-1.52588	3.66211	11.9019	19.8364	29.2969	42.1143	55.542	75.0732
170.6	-19.5312	-13.1226	-8.54492	-1.2207	3.66211	11.5967	19.8364	28.6865	41.5039	56.1523	74.7681
170.7	-19.8364	-13.1226	-8.54492	-0.915527	3.35693	11.2915	19.8364	28.0762	41.1987	56.7627	74.1577
170.8	-19.8364	-13.4277	-8.23975	-1.2207	3.05176	10.6812	19.5312	28.0762	41.1987	57.373	73.8525
170.9	-20.1416	-13.7329	-7.62939	-1.52588	3.05176	10.376	19.5312	28.0762	41.1987	57.9834	73.2422
171	-20.4468	-13.7329	-7.32422	-1.52588	2.74658	10.0708	19.5312	28.6865	41.5039	58.2886	72.3267
171.1	-20.4468	-13.4277	-7.32422	-1.83105	3.05176	10.0708	19.5312	29.6021	41.5039	57.6782	71.4111
171.2	-19.5312	-13.4277	-7.32422	-2.13623	3.35693	10.0708	19.2261	30.8228	41.5039	56.4575	71.4111
171.3	-18.6157	-13.7329	-7.32422	-2.74658	3.35693	10.0708	18.9209	32.0435	41.5039	55.542	71.7163
171.4	-18.6157	-14.0381	-7.32422	-3.35693	3.05176	10.6812	19.5312	31.7383	41.8091	55.2368	72.0215
171.5	-18.6157	-14.3433	-7.62939	-3.66211	3.05176	11.5967	19.5312	30.5176	41.8091	55.2368	72.3267
171.6	-18.9209	-14.6484	-7.32422	-3.35693	3.35693	12.207	19.5312	29.2969	42.1143	55.8472	72.6318
171.7	-18.9209	-14.6484	-7.01904	-2.74658	3.96729	11.5967	18.9209	28.6865	41.8091	56.1523	72.6318
171.8	-19.2261	-14.6484	-6.71387	-2.13623	3.96729	10.376	18.6157	28.6865	41.5039	56.7627	72.937
171.9	-19.2261	-14.3433	-6.71387	-1.83105	3.35693	9.46045	18.3105	28.9917	41.5039	56.7627	73.2422
172	-19.2261	-13.7329	-6.40869	-2.13623	2.74658	8.8501	18.3105	29.2969	41.8091	56.7627	73.2422
172.1	-19.2261	-12.8174	-6.71387	-2.74658	2.44141	9.15527	18.6157	29.2969	42.1143	56.7627	72.937
172.2	-19.2261	-12.8174	-7.32422	-2.74658	2.74658	9.76563	19.2261	29.6021	42.4194	56.7627	72.6318
172.3	-18.9209	-13.1226	-7.93457	-2.44141	2.74658	10.376	19.5312	29.6021	42.4194	56.1523	72.6318
172.4	-19.2261	-13.4277	-7.93457	-2.44141	3.05176	10.6812	19.2261	29.2969	42.4194	55.8472	72.6318
172.5	-19.8364	-13.4277	-7.93457	-2.44141	3.05176	10.6812	18.6157	28.9917	42.4194	55.542	72.937
172.6	-20.1416	-13.4277	-8.23975	-2.44141	3.35693	10.376	18.6157	28.6865	42.4194	55.2368	73.2422
172.7	-19.8364	-13.1226	-8.23975	-2.13623	3.35693	10.0708	18.9209	28.6865	42.1143	55.542	73.2422
172.8	-19.5312	-13.1226	-8.8501	-1.83105	3.35693	9.76563	19.2261	28.6865	41.5039	55.8472	72.6318
172.9	-19.2261	-13.4277	-9.15527	-1.83105	3.35693	9.76563	19.5312	28.9917	40.8936	56.4575	72.6318
173	-18.9209	-14.0381	-9.46045	-2.13623	3.66211	9.76563	19.2261	28.9917	40.2832	56.4575	72.6318
173.1	-18.6157	-14.6484	-9.46045	-2.44141	3.66211	10.0708	18.9209	28.9917	39.978	56.4575	72.937
173.2	-17.7002	-14.6484	-8.8501	-2.74658	3.66211	10.376	18.6157	28.9917	39.978	56.1523	73.2422
173.3	-17.0898	-14.0381	-8.8501	-3.05176	3.66211	10.376	18.6157	29.2969	40.2832	56.1523	73.5474
173.4	-17.395	-13.4277	-8.54492	-2.74658	3.35693	10.376	18.9209	29.6021	40.8936	56.1523	73.8525
173.5	-18.3105	-13.4277	-8.23975	-2.44141	3.05176	9.76563	19.2261	29.6021	41.5039	56.1523	74.1577
173.6	-19.5312	-13.7329	-7.93457	-1.52588	2.74658	9.76563	19.5312	29.9072	42.1143	56.1523	74.1577
173.7	-20.4468	-14.0381	-7.32422	-0.915527	2.74658	9.76563	19.5312	30.2124	42.1143	56.1523	73.8525
173.8	-21.0571	-14.3433	-7.32422	-0.915527	2.74658	10.0708	19.5312	29.9072	41.8091	56.4575	73.2422
173.9	-20.752	-14.0381	-7.32422	-1.52588	3.05176	10.6812	19.2261	29.9072	41.1987	56.1523	72.6318
174	-20.1416	-14.3433	-6.71387	-2.13623	3.66211	10.9863	18.9209	29.6021	40.8936	56.7627	72.937
174.1	-19.8364	-14.3433	-6.71387	-2.44141	3.96729	10.9863	18.9209	29.6021	41.1987	57.0679	73.5474
174.2	-19.5312	-14.3433	-6.71387	-2.74658	4.27246	10.9863	19.2261	29.9072	41.5039	57.373	74.1577
174.3	-19.5312	-14.6484	-7.01904	-2.44141	4.27246	10.9863	19.5312	29.9072	41.8091	57.6782	74.4629
174.4	-19.5312	-14.3433	-7.62939	-2.13623	3.96729	10.9863	19.5312	30.2124	41.8091	57.6782	74.4629
174.5	-19.5312	-14.0381	-7.93457	-1.83105	3.35693	10.6812	19.8364	29.9072	42.1143	57.373	74.1577
174.6	-19.2261	-14.0381	-8.54492	-1.2207	2.74658	10.0708	19.8364	29.9072	42.7246	57.0679	73.2422
174.7	-18.9209	-14.0381	-8.54492	-1.2207	2.44141	9.46045	19.5312	29.6021	43.0298	57.0679	72.6318
174.8	-18.9209	-14.3433	-7.93457	-1.52588	2.74658	9.15527	19.2261	29.2969	42.7246	57.373	72.0215
174.9	-19.5312	-14.3433	-7.62939	-1.52588	3.05176	9.46045	18.6157	28.9917	42.1143	57.6782	71.7163
175	-20.1416	-14.3433	-7.32422	-1.52588	3.66211	10.0708	18.0054	28.3813	41.8091	57.373	72.0215
175.1	-19.8364	-13.7329	-7.32422	-1.83105	3.96729	10.376	17.7002	27.771	41.5039	57.0679	72.3267
175.2	-19.5312	-13.4277	-7.93457	-2.44141	3.66211	10.376	18.0054	27.4658	41.5039	56.7627	72.3267
175.3	-19.2261	-13.4277	-8.23975	-2.74658	3.35693	10.376	18.3105	27.771	42.1143	56.1523	72.3267
175.4	-19.5312	-13.4277	-8.54492	-3.05176	2.74658	10.6812	18.9209	28.3813	42.4194	55.542	72.3267
175.5	-20.1416	-13.4277	-8.54492	-3.05176	2.44141	10.9863	19.2261	28.9917	42.1143	55.2368	72.6318
175.6	-20.1416	-13.4277	-8.23975	-2.74658	2.74658	10.6812	18.9209	29.2969	42.1143	55.542	72.6318
175.7	-20.1416	-13.7329	-8.23975	-2.13623	3.05176	10.376	18.9209	28.9917	41.8091	56.4575	72.3267
175.8	-20.1416	-13.7329	-8.23975	-1.83105	3.35693	10.376	18.6157	28.6865	41.8091	57.0679	72.0215
175.9	-19.8364	-13.7329	-8.54492	-2.44141	3.66211	9.76563	18.6157	28.6865	41.8091	57.6782	72.0215
176	-19.2261	-13.4277	-8.54492	-2.74658	3.66211	9.46045	18.6157	28.9917	41.8091	57.373	72.3267
176.1	-18.9209	-13.4277	-8.23975	-3.05176	3.35693	9.15527	18.9209	29.9072	41.5039	56.7627	72.3267
176.2	-18.6157	-13.4277	-7.93457	-3.05176	3.05176	9.46045	18.9209	30.5176	41.1987	55.8472	72.3267
176.3	-18.6157	-13.4277	-7.62939	-3.35693	2.74658	10.0708	18.6157	30.8228	40.8936	55.2368	72.3267
176.4	-18.6157	-13.4277	-7.62939	-3.66211	3.05176	10.6812	18.3105	30.5176	40.5884	54.9316	72.0215
176.5	-18.9209	-13.4277	-8.23975	-3.35693	3.35693	10.6812	18.3105	29.6021	40.5884	55.2368	72.3267
176.6	-19.2261	-13.7329	-8.23975	-3.05176	3.66211	10.376	18.3105	28.6865	40.8936	55.542	72.3267
176.7	-19.8364	-14.3433	-8.54492	-2.74658	3.66211	10.0708	18.6157	28.0762	41.1987	55.8472	72.0215
176.8	-20.1416	-14.3433	-8.54492	-3.05176	3.66211	9.46045	18.6157	27.771	41.5039	56.1523	71.7163
176.9	-19.8364	-14.6484	-8.54492	-3.35693	3.66211	9.15527	18.6157	27.771	41.5039	56.4575	71.7163
177	-19.5312	-14.6484	-8.54492	-3.35693	3.66211	9.46045	18.9209	27.771	41.5039	56.1523	71.7163
177.1	-19.2261	-14.6484	-8.54492	-3.05176	3.66211	10.0708	19.2261	28.0762	41.8091	56.1523	71.7163
177.2	-19.2261	-14.3433	-8.23975	-2.13623	3.05176	10.376	19.5312	28.3813	41.8091	56.4575	71.7163
177.3	-19.2261	-14.0381	-7.62939	-1.83105	2.74658	10.376	19.8364	28.9917	41.8091	56.7627	72.0215
177.4	-19.2261	-13.7329	-7.62939	-1.2207	2.44141	9.76563	19.5312	29.2969	41.8091	57.0679	72.3267
177.5	-19.5312	-13.7329	-8.23975	-1.52588	2.13623	9.76563	18.9209	29.9072	42.1143	57.373	72.6318
177.6	-19.8364	-13.7329	-8.54492	-1.83105	2.13623	9.76563	18.0054	30.2124	42.7246	57.373	73.2422
177.7	-19.8364	-13.7329	-8.54492	-2.13623	2.13623	10.0708	18.0054	29.9072	43.0298	57.373	73.5474
177.8	-19.5312	-13.4277	-8.54492	-2.44141	2.44141	10.376	18.3105	29.6021	42.7246	56.7627	73.8525
177.9	-19.5312	-13.4277	-7.93457	-2.44141	2.74658	10.9863	18.6157	29.6021	42.1143	56.1523	73.8525
178	27.771	30.2124	28.6865	25.9399	20.1416	11.2915	3.66211	3.96729	7.01904	16.1743	30.2124
178.1	654.602	562.439	446.472	321.655	182.495	11.2915	-147.705	-273.743	-392.761	-486.45	-563.66
178.2	2088.62	1732.48	1337.89	931.396	502.319	10.9863	-453.796	-856.628	-1256.1	-1611.02	-1941.53
178.3	3609.31	2947.69	2248.54	1540.22	812.378	10.376	-757.141	-1450.81	-2150.27	-2799.38	-3427.12
178.4	4516.91	3657.53	2771.3	1880.49	978.088	10.0708	-924.988	-1794.13	-2676.09	-3513.79	-4339.9
178.5	4643.25	3741.15	2823.18	1903.99	980.53	10.0708	-935.059	-1831.67	-2742.92	-3622.74	-4498.29
178.6	4209.9	3381.96	2546.39	1710.21	874.329	10.0708	-837.402	-1654.05	-2482.91	-3293.76	-4102.48
178.7	3530.27	2831.12	2129.52	1426.39	725.708	9.76563	-695.19	-1383.06	-2079.77	-2767.33	-3453.06
178.8	2832.64	2269.59	1707.46	1141.66	579.529	9.46045	-552.673	-1106.57	-1666.87	-2222.6	-2774.96
178.9	2227.78	1784.06	1343.69	898.132	454.712	9.76563	-430.603	-867.31	-1308.59	-1746.83	-2181.4
179	1742.55	1395.57	1052.25	703.43	355.53	10.0708	-333.557	-675.354	-1020.2	-1363.22	-1701.97
179.1	1365.05	1094.06	825.5	552.368	278.931	10.0708	-258.484	-525.513	-794.983	-1063.54	-1328.12
179.2	1072.39	860.596	649.109	435.486	220.337	10.0708	-200.195	-409.241	-620.422	-831.604	-1038.82
179.3	845.337	679.321	512.39	344.543	175.171	10.376	-155.029	-318.909	-484.314	-651.55	-814.819
179.4	668.64	537.72	406.189	273.743	140.076	10.9863	-119.629	-248.413	-378.113	-511.78	-639.343
179.5	531.006	427.246	323.181	218.201	112.915	11.5967	-91.5527	-193.787	-295.41	-402.527	-502.319
179.6	423.889	340.881	257.874	174.866	91.8579	11.5967	-70.1904	-151.367	-231.628	-316.772	-394.897
179.7	339.966	273.743	207.214	140.686	75.3784	10.9863	-53.7109	-119.019	-181.885	-249.329	-311.279
179.8	274.353	221.558	167.542	113.831	62.2559	10.6812	-40.8936	-93.689	-143.127	-197.144	-245.972
179.9	223.083	180.359	137.024	93.3838	52.1851	10.6812	-31.4331	-73.2422	-113.22	-156.25	-195.312
180	183.716	148.621	113.22	77.8198	43.9453	9.76563	-23.4985	-56.7627	-89.7217	-124.512	-155.64
180.1	152.893	123.596	94.6045	65.6128	37.5366	9.46045	-16.7847	-43.6401	-71.106	-99.7925	-125.122
180.2	128.784	103.76	80.5664	55.8472	32.0435	9.76563	-10.9863	-33.5693	-56.1523	-80.2612	-101.013
180.3	110.168	88.501	69.2749	48.2178	28.0762	10.0708	-6.40869	-25.6348	-44.8608	-65.0024	-82.3975
180.4	95.2148	76.2939	60.4248	42.1143	25.6348	10.0708	-3.05176	-19.2261	-35.7056	-52.7954	-67.749
180.5	83.6182	67.1387	52.7954	37.5366	23.8037	10.0708	-0.610352	-14.3433	-28.3813	-43.0298	-55.542
180.6	74.4629	59.8145	46.9971	34.4849	21.9727	10.0708	0.915527	-10.6812	-22.2778	-35.4004	-46.3867
180.7	66.2231	54.0161	42.4194	32.3486	20.1416	10.6812	2.13623	-7.93457	-17.7002	-29.2969	-38.7573
180.8	59.5093	49.4385	38.4521	30.2124	18.6157	10.6812	2.74658	-5.79834	-14.0381	-24.7192	-32.3486
180.9	54.3213	45.7764	35.4004	28.0762	17.395	10.376	3.35693	-3.66211	-11.5967	-21.3623	-26.8555
181	50.354	43.0298	33.2642	25.9399	16.1743	10.0708	3.66211	-1.83105	-9.46045	-18.0054	-22.8882
181.1	47.6074	40.5884	31.4331	24.4141	14.9536	10.0708	3.96729	-0.305176	-7.93457	-14.9536	-19.8364
181.2	45.166	38.4521	29.9072	23.1934	14.0381	10.0708	4.27246	0.305176	-6.10352	-11.9019	-17.7002
181.3	43.335	36.6211	28.6865	21.9727	13.7329	10.376	4.27246	0.915527	-4.57764	-9.46045	-16.4795
181.4	42.1143	35.4004	27.771	21.0571	13.4277	10.9863	4.88281	1.52588	-3.66211	-7.93457	-15.2588
181.5	40.8936	34.4849	27.4658	20.752	13.4277	10.9863	5.18799	2.44141	-2.74658	-7.01904	-14.0381
181.6	39.3677	33.8745	26.8555	20.4468	13.7329	10.6812	5.79834	3.05176	-1.83105	-6.40869	-12.5122
181.7	38.147	33.2642	26.2451	19.8364	14.6484	10.376	6.10352	3.35693	-0.915527	-6.10352	-10.6812
181.8	36.6211	32.3486	25.6348	19.2261	15.564	10.376	6.40869	3.35693	-0.305176	-5.49316	-9.46045
181.9	36.0107	31.4331	25.3296	18.6157	15.8691	10.6812	7.32422	3.35693	0	-4.88281	-8.8501
182	35.4004	30.2124	25.0244	18.3105	15.8691	10.6812	7.62939	3.96729	-0.305176	-4.27246	-8.23975
182.1	34.79	28.9917	24.7192	18.3105	15.2588	10.376	7.62939	4.57764	0	-3.66211	-7.93457
182.2	34.1797	28.0762	24.1089	18.0054	14.3433	10.0708	7.93457	5.18799	0.305176	-3.05176	-7.32422
182.3	33.5693	27.771	23.8037	18.0054	13.7329	9.76563	7.93457	5.18799	1.2207	-2.74658	-6.71387
182.4	32.959	27.771	22.8882	17.7002	13.4277	9.76563	7.93457	4.88281	1.83105	-2.74658	-5.79834
182.5	32.6538	27.771	22.583	17.7002	13.4277	10.0708	7.93457	4.88281	1.83105	-2.74658	-5.18799
182.6	32.6538	27.771	21.9727	17.7002	13.1226	10.376	7.62939	4.57764	1.83105	-3.05176	-4.88281
182.7	32.6538	27.771	21.6675	17.395	12.8174	10.6812	7.93457	4.57764	1.83105	-3.05176	-4.88281
182.8	32.3486	27.1606	21.3623	17.395	12.8174	10.376	7.93457	4.57764	2.44141	-2.74658	-4.27246
182.9	31.4331	26.2451	21.3623	17.0898	12.8174	10.0708	7.62939	4.88281	2.44141	-2.13623	-3.35693
183	30.5176	25.6348	21.3623	16.7847	12.8174	10.0708	7.62939	5.18799	2.44141	-1.52588	-2.13623
183.1	29.9072	25.0244	21.6675	16.1743	12.5122	10.0708	7.62939	5.49316	2.13623	-0.915527	-1.52588
183.2	29.6021	24.7192	21.9727	16.1743	12.5122	10.0708	7.62939	6.10352	1.83105	-0.610352	-0.915527
183.3	29.2969	25.0244	21.6675	15.8691	12.207	10.0708	7.62939	6.10352	2.13623	-0.305176	-0.305176
183.4	29.6021	25.3296	21.0571	15.564	12.207	10.376	7.93457	6.40869	2.74658	0	0
183.5	29.6021	25.3296	20.4468	15.2588	12.207	10.376	7.93457	6.10352	3.35693	0.305176	0
183.6	29.9072	25.3296	19.5312	14.9536	11.9019	10.0708	7.93457	5.79834	3.35693	0.915527	-0.610352
183.7	29.6021	25.0244	18.6157	14.9536	12.207	10.0708	7.62939	5.49316	3.66211	1.52588	-0.610352
183.8	29.6021	24.4141	18.6157	15.564	12.207	10.0708	7.32422	5.18799	3.96729	1.83105	-0.305176
183.9	29.2969	24.1089	18.9209	15.8691	12.5122	10.376	7.32422	5.18799	4.27246	1.83105	0
184	28.9917	23.4985	19.5312	16.1743	12.8174	10.9863	7.62939	5.49316	4.27246	1.83105	0
184.1	28.0762	23.4985	20.1416	16.1743	13.1226	11.5967	8.23975	6.10352	4.88281	1.83105	-0.305176
184.2	27.1606	23.4985	19.8364	15.8691	13.1226	11.5967	8.8501	6.40869	5.18799	2.44141	-0.610352
184.3	26.8555	23.4985	19.8364	15.8691	12.8174	11.2915	9.46045	6.71387	5.49316	2.44141	-0.610352
184.4	26.8555	23.4985	19.8364	15.564	12.5122	10.9863	10.0708	6.71387	5.79834	2.44141	-0.305176
184.5	27.1606	23.1934	19.8364	15.8691	12.5122	10.6812	10.0708	6.40869	5.49316	2.13623	0
184.6	27.771	23.1934	19.8364	16.1743	12.5122	10.0708	9.76562	6.71387	4.88281	1.83105	-0.305176
184.7	27.4658	23.1934	19.8364	16.4795	12.8174	9.76563	9.46045	7.01904	4.57764	1.83105	-0.305176
184.8	27.1606	23.1934	19.8364	16.1743	12.8174	9.76563	9.15527	7.01904	4.27246	1.83105	0
184.9	26.8555	23.1934	19.8364	15.2588	13.1226	10.376	8.8501	6.71387	4.27246	2.44141	0.305176
185	26.5503	23.1934	19.2261	14.3433	13.7329	10.6812	8.8501	6.71387	4.27246	2.74658	0.610352
185.1	26.2451	23.1934	18.9209	14.3433	14.0381	11.2915	8.8501	7.01904	4.57764	2.44141	0.915527
185.2	26.5503	23.1934	18.3105	14.3433	14.0381	11.5967	8.54492	7.01904	4.88281	2.44141	1.2207
185.3	26.2451	22.583	18.0054	14.9536	13.4277	11.2915	8.54492	7.01904	5.18799	2.74658	0.915527
185.4	25.9399	21.9727	18.0054	15.2588	13.4277	10.9863	8.23975	6.71387	5.49316	2.74658	0.610352
185.5	25.6348	21.6675	18.3105	15.8691	13.1226	10.376	7.93457	6.40869	5.18799	3.05176	0.305176
185.6	25.3296	21.6675	18.6157	15.8691	13.1226	10.0708	8.23975	6.40869	4.57764	2.74658	0.305176
185.7	25.3296	21.6675	18.6157	15.564	12.8174	9.76563	8.8501	7.01904	4.57764	2.74658	0.915527
185.8	25.3296	21.9727	18.6157	14.9536	12.207	9.76563	8.8501	7.93457	4.57764	2.44141	1.83105
185.9	25.6348	22.2778	18.6157	14.3433	11.5967	9.76563	8.8501	8.8501	5.18799	2.13623	2.44141
186	26.2451	22.2778	18.3105	14.3433	11.5967	10.0708	9.15527	9.15527	5.49316	2.44141	2.74658
186.1	26.5503	21.9727	18.0054	15.2588	11.5967	10.376	9.15527	8.8501	5.49316	2.74658	2.74658
186.2	26.5503	21.9727	18.0054	16.1743	11.5967	10.9863	9.15527	8.23975	5.18799	3.05176	2.13623
186.3	26.2451	22.2778	17.7002	16.4795	11.5967	11.5967	9.15527	7.93457	5.49316	3.35693	1.2207
186.4	25.6348	22.583	17.7002	16.4795	11.9019	11.5967	9.15527	7.32422	5.18799	3.66211	0.915527
186.5	25.0244	22.583	17.7002	16.1743	12.5122	11.9019	9.15527	7.01904	5.18799	3.96729	0.915527
186.6	24.4141	22.2778	18.0054	15.8691	12.5122	11.9019	8.8501	6.40869	5.18799	4.27246	0.915527
186.7	23.8037	21.3623	18.0054	15.564	12.5122	11.5967	8.54492	6.10352	5.49316	4.27246	1.2207
186.8	23.8037	20.752	17.7002	15.2588	12.207	10.6812	8.23975	6.10352	5.79834	3.96729	1.52588
186.9	23.1934	20.4468	17.395	14.6484	11.5967	10.0708	8.54492	6.71387	5.79834	3.35693	2.44141
187	22.8882	20.4468	17.0898	14.0381	10.9863	10.0708	9.15527	7.01904	5.49316	3.05176	3.35693
187.1	23.1934	21.0571	17.0898	13.1226	10.9863	10.9863	9.46045	7.32422	5.18799	3.05176	3.96729
187.2	23.4985	21.6675	17.395	12.207	11.5967	11.5967	9.15527	7.62939	5.49316	3.66211	4.57764
187.3	24.4141	22.2778	17.395	12.5122	11.9019	11.2915	9.15527	7.62939	5.49316	4.27246	4.88281
187.4	25.0244	21.9727	17.0898	13.1226	12.207	10.6812	9.46045	7.62939	5.79834	4.88281	4.88281
187.5	25.0244	21.3623	16.7847	13.7329	11.9019	10.0708	9.76562	7.93457	6.40869	5.18799	4.57764
187.6	24.7192	21.0571	17.0898	14.3433	11.5967	10.0708	10.0708	7.62939	7.01904	6.10352	3.05176
187.7	24.1089	21.0571	17.395	14.6484	11.5967	10.0708	10.0708	7.62939	7.62939	6.40869	1.83105
187.8	23.4985	21.0571	17.0898	14.9536	11.5967	10.0708	9.46045	7.93457	7.93457	6.40869	1.2207
187.9	23.1934	21.0571	17.395	15.564	11.9019	9.76563	9.46045	8.54492	7.62939	6.10352	1.52588
188	23.1934	20.4468	17.395	15.2588	12.207	9.46045	9.76562	8.54492	7.32422	5.49316	2.44141
188.1	23.1934	20.1416	17.395	14.6484	11.9019	9.76563	9.46045	7.62939	6.71387	5.49316	3.05176
188.2	22.8882	20.4468	17.0898	14.0381	11.2915	10.376	9.15527	7.01904	6.10352	5.49316	3.96729
188.3	22.8882	20.4468	17.0898	13.7329	11.2915	10.9863	8.8501	6.71387	6.10352	5.18799	4.88281
188.4	22.2778	20.4468	17.7002	13.7329	11.5967	10.9863	8.8501	6.71387	5.79834	4.88281	5.18799
188.5	21.6675	20.1416	18.0054	14.3433	11.2915	10.6812	8.8501	7.01904	5.79834	4.27246	4.88281
188.6	21.6675	19.5312	18.3105	14.6484	10.9863	10.9863	9.15527	7.32422	6.10352	3.96729	4.27246
188.7	21.6675	19.2261	18.0054	14.3433	10.9863	11.2915	9.46045	7.62939	6.10352	4.27246	3.96729
188.8	21.9727	19.5312	17.0898	13.7329	10.9863	11.2915	9.15527	7.93457	6.10352	4.57764	4.27246
188.9	22.2778	19.5312	16.1743	13.1226	11.2915	11.2915	8.54492	7.93457	6.10352	4.88281	4.27246
189	21.9727	19.2261	15.564	12.5122	11.2915	10.9863	8.23975	7.93457	6.10352	5.49316	3.96729
189.1	21.9727	18.6157	15.8691	11.9019	11.9019	10.9863	8.23975	7.32422	6.10352	6.10352	3.66211
189.2	22.2778	18.6157	16.1743	11.5967	11.9019	10.6812	8.8501	7.01904	6.71387	6.40869	3.66211
189.3	22.8882	18.6157	16.4795	11.9019	11.5967	10.376	9.46045	7.01904	7.32422	6.71387	3.96729
189.4	22.8882	19.2261	16.4795	12.5122	11.2915	10.0708	9.76562	7.32422	7.32422	6.71387	3.66211
189.5	22.583	19.8364	15.8691	13.4277	11.2915	9.46045	9.76562	7.93457	6.71387	6.40869	3.35693
189.6	21.9727	20.4468	15.564	13.7329	11.5967	9.46045	9.76562	8.54492	6.40869	6.10352	2.74658
189.7	21.6675	20.4468	15.2588	13.7329	12.207	9.46045	10.0708	9.15527	6.10352	6.10352	2.74658
189.8	21.6675	20.1416	15.564	13.7329	12.5122	10.0708	10.0708	9.15527	6.10352	5.79834	2.74658
189.9	21.9727	19.8364	15.8691	13.7329	12.8174	10.9863	10.0708	9.15527	6.40869	5.18799	3.05176
190	22.2778	19.5312	16.4795	13.7329	12.8174	11.2915	9.76562	8.8501	6.71387	4.57764	3.66211
190.1	21.9727	19.5312	16.7847	13.7329	12.8174	10.9863	9.46045	8.54492	6.71387	4.57764	4.27246
190.2	21.9727	19.2261	17.0898	13.7329	12.207	10.376	8.8501	8.23975	6.71387	4.88281	4.88281
190.3	21.9727	18.9209	17.0898	14.0381	11.9019	10.376	8.23975	7.62939	7.01904	5.18799	5.49316
190.4	21.6675	18.9209	17.0898	13.7329	11.2915	10.376	8.23975	7.62939	7.32422	5.49316	5.49316
190.5	21.3623	18.9209	16.7847	13.4277	10.9863	10.0708	8.23975	7.32422	7.93457	5.79834	5.79834
190.6	20.752	18.6157	16.1743	13.1226	10.9863	10.0708	8.23975	7.01904	8.54492	5.79834	5.79834
190.7	20.4468	18.0054	16.1743	13.1226	10.6812	10.0708	8.54492	7.32422	8.23975	5.79834	5.79834
190.8	19.8364	17.7002	15.8691	13.1226	10.6812	10.6812	8.8501	7.01904	7.62939	5.49316	5.18799
190.9	19.8364	17.7002	16.1743	13.1226	10.9863	10.9863	9.15527	7.01904	7.32422	5.18799	4.88281
191	20.1416	18.0054	16.4795	13.4277	11.5967	10.9863	9.15527	7.01904	7.01904	5.18799	4.57764
191.1	20.4468	18.9209	16.7847	13.4277	12.207	10.376	9.15527	7.01904	6.71387	5.18799	4.57764
191.2	20.4468	19.5312	16.7847	13.7329	12.5122	10.0708	9.46045	7.32422	7.01904	5.49316	4.57764
191.3	20.4468	19.8364	16.4795	14.0381	12.5122	10.0708	9.76562	7.93457	7.01904	5.79834	4.57764
191.4	20.4468	19.8364	15.8691	14.0381	12.207	10.6812	10.0708	8.54492	7.01904	5.79834	4.57764
191.5	20.4468	19.2261	15.564	13.4277	11.5967	10.6812	9.46045	9.15527	6.71387	6.40869	4.88281
191.6	20.4468	18.6157	14.9536	12.8174	11.2915	10.376	8.8501	9.15527	6.71387	6.71387	5.49316
191.7	20.752	18.3105	14.3433	12.5122	10.9863	9.76563	8.23975	9.15527	7.01904	6.71387	5.79834
191.8	21.0571	18.0054	14.6484	11.9019	10.376	9.15527	7.93457	9.46045	7.32422	6.71387	6.10352
191.9	21.3623	17.7002	14.9536	12.207	10.0708	8.8501	8.23975	9.46045	7.32422	6.40869	5.79834
192	21.3623	17.7002	15.2588	12.8174	10.376	8.8501	8.8501	9.15527	7.01904	6.10352	5.79834
192.1	20.752	18.0054	14.9536	13.4277	10.6812	9.15527	9.46045	9.15527	6.71387	5.79834	5.79834
192.2	19.8364	18.0054	14.6484	14.0381	10.9863	9.76563	9.76562	8.8501	6.40869	6.10352	5.18799
192.3	19.2261	18.0054	14.9536	14.3433	11.2915	10.0708	9.46045	8.23975	6.40869	6.40869	5.18799
192.4	18.6157	17.395	14.9536	14.3433	11.9019	10.376	8.8501	7.32422	7.01904	7.01904	4.88281
192.5	18.6157	16.7847	14.9536	14.0381	12.5122	10.376	8.23975	6.71387	7.93457	7.01904	4.88281
192.6	18.6157	16.4795	15.2588	13.1226	12.8174	10.376	8.23975	6.40869	8.54492	6.40869	4.57764
192.7	19.5312	17.0898	15.2588	12.207	13.4277	10.0708	8.54492	6.10352	9.15527	5.79834	4.88281
192.8	20.4468	17.7002	15.2588	11.9019	13.1226	9.76563	9.46045	6.10352	9.46045	5.49316	5.18799
192.9	20.752	18.3105	14.9536	12.207	12.5122	9.76563	9.76562	6.40869	9.15527	5.79834	5.49316
193	20.1416	18.6157	14.9536	12.8174	11.9019	10.0708	9.76562	7.32422	8.54492	5.79834	6.10352
193.1	19.5312	18.3105	14.6484	13.1226	11.5967	10.0708	9.46045	8.23975	7.62939	5.79834	6.40869
193.2	19.5312	18.0054	14.0381	13.4277	11.2915	10.0708	8.8501	8.8501	7.32422	5.49316	6.71387
193.3	19.8364	17.7002	13.7329	13.1226	10.9863	9.76563	8.54492	9.46045	7.01904	5.79834	6.10352
193.4	19.5312	17.395	13.7329	12.5122	10.6812	9.46045	7.93457	9.46045	7.32422	6.10352	5.79834
193.5	19.2261	17.395	14.3433	11.2915	10.9863	9.46045	7.93457	9.46045	7.32422	6.40869	5.79834
193.6	18.9209	17.395	14.9536	10.9863	11.2915	9.76563	7.93457	9.15527	7.01904	6.40869	5.79834
193.7	19.2261	17.395	15.564	11.5967	11.5967	10.376	8.23975	8.54492	7.01904	6.40869	6.10352
193.8	19.2261	16.4795	15.8691	12.207	11.2915	10.376	8.54492	8.23975	6.71387	6.71387	6.40869
193.9	19.2261	15.8691	15.2588	12.5122	10.6812	10.376	8.54492	7.93457	7.01904	6.71387	6.71387
194	19.5312	15.8691	14.3433	13.1226	10.0708	10.0708	8.8501	8.23975	7.62939	6.71387	6.40869
194.1	19.5312	16.1743	13.4277	13.1226	10.0708	10.0708	9.46045	8.23975	8.23975	6.40869	6.10352
194.2	19.2261	16.7847	12.8174	13.1226	10.0708	10.0708	10.0708	8.8501	8.8501	6.40869	5.49316
194.3	18.6157	16.7847	13.1226	12.8174	10.0708	10.376	10.0708	9.15527	8.8501	6.71387	5.18799
194.4	18.3105	16.4795	13.4277	12.8174	10.0708	10.6812	10.0708	9.15527	8.8501	6.71387	5.18799
194.5	18.3105	16.4795	14.0381	13.4277	10.0708	10.9863	10.0708	8.8501	8.8501	7.01904	5.18799
194.6	18.6157	16.4795	14.3433	13.4277	9.76562	10.9863	10.376	8.54492	8.54492	7.01904	5.49316
194.7	18.9209	16.4795	14.6484	13.4277	10.0708	10.6812	10.0708	8.23975	8.54492	7.62939	5.79834
194.8	18.9209	16.4795	14.3433	13.4277	10.0708	10.9863	9.46045	8.54492	8.54492	7.62939	5.49316
194.9	18.9209	16.4795	14.3433	13.1226	10.376	10.9863	9.15527	8.8501	7.93457	7.62939	5.49316
195	18.6157	17.0898	14.3433	12.8174	10.6812	11.2915	8.8501	9.46045	7.32422	7.32422	5.79834
195.1	18.3105	17.395	14.3433	13.1226	10.9863	10.9863	9.15527	9.46045	7.01904	6.71387	6.40869
195.2	18.3105	17.7002	14.3433	13.4277	10.9863	10.9863	9.15527	9.15527	6.71387	6.10352	6.71387
195.3	18.3105	17.7002	14.6484	13.4277	10.9863	11.2915	8.8501	9.15527	6.71387	5.79834	6.71387
195.4	18.6157	17.7002	14.9536	13.4277	11.2915	11.5967	8.54492	8.8501	7.01904	6.10352	6.40869
195.5	18.6157	18.0054	14.6484	12.8174	11.5967	11.9019	8.23975	8.23975	7.32422	6.40869	6.10352
195.6	18.6157	18.0054	14.6484	12.207	11.5967	11.9019	8.23975	7.93457	7.93457	6.10352	6.10352
195.7	18.6157	17.7002	14.3433	10.9863	11.5967	11.2915	8.8501	7.93457	8.23975	6.10352	6.40869
195.8	18.3105	16.7847	13.4277	10.6812	11.5967	10.0708	9.15527	8.54492	8.23975	6.40869	6.40869
195.9	18.3105	15.8691	12.8174	10.6812	11.5967	9.46045	9.46045	8.8501	8.23975	6.71387	6.40869
196	18.6157	14.6484	12.8174	11.5967	11.5967	9.15527	10.376	8.8501	8.23975	7.01904	6.40869
196.1	19.2261	14.3433	13.4277	12.207	11.2915	9.46045	10.9863	8.8501	8.23975	6.71387	6.71387
196.2	19.2261	14.3433	14.0381	12.5122	10.9863	9.76563	11.2915	8.8501	8.23975	6.71387	7.01904
196.3	19.2261	14.9536	14.6484	12.5122	10.376	9.76563	10.9863	8.8501	7.93457	6.40869	7.32422
196.4	18.9209	15.564	14.6484	12.5122	10.376	9.76563	10.376	8.54492	8.23975	6.71387	7.32422
196.5	18.9209	16.1743	14.6484	12.8174	10.376	9.76563	9.76562	8.23975	8.8501	7.32422	7.01904
196.6	18.9209	16.7847	14.9536	13.1226	10.376	9.76563	9.15527	8.54492	9.76562	7.93457	6.10352
196.7	18.6157	16.7847	15.2588	13.1226	10.6812	9.76563	9.46045	9.15527	9.76562	7.93457	5.79834
196.8	18.3105	16.7847	15.564	13.1226	10.6812	9.76563	10.0708	9.46045	9.15527	7.62939	5.49316
196.9	17.7002	17.0898	15.564	12.8174	10.376	9.76563	10.376	9.46045	8.54492	7.32422	6.10352
197	17.395	17.395	15.2588	11.5967	10.376	9.76563	10.376	9.15527	7.93457	7.01904	6.40869
197.1	17.395	18.0054	14.3433	10.9863	10.9863	9.46045	10.0708	9.15527	7.32422	6.71387	7.01904
197.2	17.7002	17.7002	13.7329	11.2915	11.9019	9.76563	10.0708	8.8501	7.01904	6.40869	7.32422
197.3	17.7002	16.4795	13.7329	12.207	11.9019	10.0708	10.376	8.8501	7.01904	6.40869	7.01904
197.4	17.0898	15.564	14.0381	12.8174	11.2915	10.6812	10.376	8.8501	7.32422	6.71387	7.01904
197.5	16.7847	15.2588	14.3433	13.1226	10.6812	10.9863	10.0708	9.15527	7.93457	7.62939	6.40869
197.6	16.7847	15.2588	14.3433	13.1226	10.376	10.9863	9.15527	9.15527	8.54492	8.23975	6.40869
197.7	17.0898	15.564	14.6484	12.5122	10.376	10.9863	8.54492	9.46045	8.54492	8.8501	6.40869
197.8	17.7002	15.8691	14.3433	12.5122	10.6812	10.9863	8.54492	9.76562	8.23975	9.15527	6.71387
197.9	18.3105	15.8691	14.0381	12.8174	10.6812	11.2915	8.54492	9.76562	7.62939	8.8501	7.01904
198	18.6157	15.564	14.0381	13.1226	10.9863	11.5967	8.54492	10.0708	7.01904	8.23975	6.71387
198.1	18.6157	15.2588	13.7329	13.1226	11.2915	11.5967	8.8501	9.76562	7.32422	7.62939	6.40869
198.2	18.6157	14.9536	13.7329	13.4277	11.2915	11.2915	8.8501	9.46045	7.93457	7.32422	6.71387
198.3	18.6157	15.564	13.7329	13.1226	10.9863	11.2915	9.46045	8.8501	8.23975	6.71387	7.01904
198.4	18.6157	16.1743	13.4277	12.8174	10.9863	11.2915	10.0708	8.54492	8.54492	6.71387	7.32422
198.5	18.0054	16.7847	13.1226	12.5122	11.2915	11.2915	10.376	8.54492	8.8501	7.01904	7.62939
198.6	17.395	17.395	13.1226	12.5122	11.5967	11.2915	10.6812	8.23975	9.46045	7.32422	7.93457
198.7	17.395	17.7002	13.4277	13.1226	11.5967	10.9863	10.6812	7.62939	10.0708	7.32422	7.62939
198.8	17.7002	16.7847	13.4277	13.4277	11.2915	10.0708	10.6812	7.32422	10.0708	7.32422	7.32422
198.9	18.0054	15.8691	13.7329	13.4277	10.9863	9.76563	10.376	7.32422	9.76562	7.01904	6.71387
199	18.3105	15.2588	14.0381	12.8174	10.6812	9.76563	10.0708	7.32422	9.46045	6.71387	6.40869
199.1	18.3105	15.2588	14.3433	12.207	10.6812	10.0708	9.46045	7.32422	8.8501	6.40869	6.40869
199.2	18.6157	15.8691	14.3433	12.207	10.9863	10.376	9.46045	7.93457	8.54492	6.40869	7.01904
199.3	19.2261	16.7847	14.0381	12.207	11.2915	10.376	9.46045	8.8501	8.54492	7.01904	7.32422
199.4	18.9209	17.395	14.0381	11.9019	11.2915	10.0708	9.15527	9.46045	8.54492	7.62939	7.01904
199.5	18.3105	17.7002	14.0381	11.9019	10.9863	10.0708	8.8501	10.0708	8.23975	8.23975	6.40869
199.6	17.7002	17.0898	14.3433	12.207	10.9863	10.376	8.54492	10.0708	8.23975	8.54492	6.71387
199.7	17.0898	16.1743	14.3433	12.5122	10.9863	10.376	8.54492	10.0708	8.54492	8.54492	7.01904
199.8	16.7847	15.2588	13.7329	12.5122	11.2915	10.376	8.8501	9.76562	9.15527	8.54492	7.01904
199.9	16.4795	14.3433	13.1226	12.207	11.2915	10.6812	9.15527	9.76562	9.15527	8.8501	7.01904
[truncated: 1 more rows]

## Sheet: figureA_washout
Time (ms)	Im_scaled (nA)	Im_scaled (nA)	Im_scaled (nA)	Im_scaled (nA)	Im_scaled (nA)	Im_scaled (pA)	Im_scaled (nA)	Im_scaled (nA)	Im_scaled (nA)	Im_scaled (nA)	Im_scaled (nA)
0.1	194.397	196.533	198.975	201.416	200.195	203.857	198.669	202.332	198.059	199.585	198.975
0.2	193.787	197.144	198.669	201.721	201.416	203.552	198.975	202.637	198.059	199.585	198.364
0.3	192.871	197.449	198.059	202.332	202.332	203.857	198.975	202.942	198.059	199.89	198.364
0.4	192.566	197.754	198.669	203.247	202.332	203.857	199.585	202.942	198.059	200.195	198.669
0.5	192.566	197.754	199.585	203.552	202.026	203.857	199.89	202.637	198.059	200.5	198.669
0.6	192.871	197.754	200.5	203.552	201.721	203.552	199.89	201.721	197.754	200.806	198.669
0.7	193.481	197.449	200.806	202.942	201.721	202.942	200.195	201.111	197.144	200.5	198.669
0.8	193.481	196.533	201.111	202.637	201.416	202.637	200.5	200.195	196.838	200.195	199.28
0.9	193.481	195.923	201.416	202.942	200.806	202.026	200.806	199.585	196.533	199.585	199.28
1	193.787	195.923	201.416	203.247	200.5	201.721	201.416	199.89	197.144	198.975	199.28
1.1	194.092	196.228	201.111	203.247	200.195	201.721	202.026	199.89	197.754	198.364	199.585
1.2	195.007	196.533	201.111	202.637	199.89	201.721	202.026	200.5	198.364	198.364	199.585
1.3	195.618	196.533	201.416	202.026	199.89	202.026	201.721	200.806	198.669	198.975	199.89
1.4	196.228	196.838	201.416	202.026	199.585	202.637	201.721	201.111	198.669	199.28	199.89
1.5	196.838	197.449	201.721	202.026	199.28	203.552	201.721	201.416	198.975	199.585	199.585
1.6	196.838	198.059	202.026	201.721	198.975	203.857	201.721	201.721	198.669	199.585	199.28
1.7	196.533	198.364	201.721	201.721	199.28	204.163	201.416	202.026	198.059	199.28	198.975
1.8	196.228	198.975	201.111	201.721	199.585	204.468	200.195	202.332	197.754	198.975	198.669
1.9	196.228	199.28	200.5	201.721	200.195	204.468	198.975	202.332	197.754	198.975	198.364
2	195.923	199.585	200.195	201.721	200.5	204.773	198.364	202.026	197.754	198.975	198.059
2.1	195.618	199.89	200.5	201.721	200.195	204.773	198.364	201.416	197.144	199.585	197.754
2.2	195.312	200.5	200.5	201.416	199.585	204.468	198.975	200.806	196.533	200.195	197.449
2.3	195.007	200.5	200.5	201.416	199.585	204.468	199.585	200.195	195.923	200.806	197.449
2.4	194.702	200.195	200.5	201.721	200.195	204.468	199.585	199.89	195.312	200.806	197.754
2.5	194.702	200.195	200.195	201.416	200.806	204.773	199.89	200.195	194.702	201.111	198.364
2.6	194.702	200.5	200.5	200.806	201.416	204.773	199.585	200.195	194.092	201.111	198.669
2.7	194.702	200.5	200.806	200.5	201.416	204.468	199.28	200.5	193.787	201.111	198.669
2.8	195.007	200.5	201.111	201.111	201.111	204.468	199.28	200.5	194.397	200.806	198.975
2.9	195.312	200.806	200.806	201.721	200.806	204.468	199.28	200.5	195.312	200.195	199.28
3	195.312	200.5	200.5	202.637	200.5	204.163	199.585	200.806	196.533	199.585	199.28
3.1	195.007	199.89	200.5	202.332	200.806	203.552	200.195	201.111	197.144	199.28	198.364
3.2	195.007	198.975	200.5	201.721	200.806	202.942	200.5	201.416	197.144	199.585	197.754
3.3	195.312	198.059	200.5	200.806	200.5	202.942	200.5	202.026	196.838	199.89	196.838
3.4	195.007	197.144	200.806	200.195	200.195	203.552	200.195	202.637	196.533	199.89	196.533
3.5	194.702	196.838	201.111	200.195	200.195	203.857	199.89	202.942	195.923	199.585	196.533
3.6	194.397	196.838	201.416	200.806	200.195	204.163	199.585	202.942	195.923	199.28	196.533
3.7	193.481	196.838	201.721	201.721	200.5	204.163	199.89	202.942	196.228	198.975	196.533
3.8	192.566	196.838	201.721	202.332	200.806	204.468	199.89	202.942	196.228	198.975	197.144
3.9	192.261	196.838	201.416	202.637	200.806	204.468	199.89	202.637	195.923	199.28	197.754
4	192.566	197.144	201.111	202.637	200.806	204.468	199.28	202.026	195.312	199.585	198.364
4.1	192.871	197.449	200.5	202.332	200.5	204.163	199.28	201.416	195.007	199.89	198.669
4.2	193.176	197.449	200.195	201.416	200.5	203.552	199.89	201.111	195.312	199.89	198.975
4.3	193.176	197.449	200.195	200.806	200.195	202.942	200.806	201.416	195.618	199.585	199.28
4.4	193.481	197.754	200.195	200.5	200.195	202.637	201.416	202.026	195.923	198.975	199.28
4.5	193.481	197.754	200.5	200.5	199.89	202.637	202.026	202.332	195.923	198.669	199.28
4.6	193.481	197.449	200.195	200.806	199.585	202.637	202.332	202.332	195.923	198.364	198.669
4.7	193.481	197.449	200.195	200.806	199.585	202.332	202.332	202.026	195.618	198.364	198.059
4.8	193.176	197.449	199.89	201.111	199.585	202.026	201.721	201.721	195.618	198.059	198.059
4.9	193.176	197.449	199.585	201.111	199.585	202.637	200.806	201.111	195.923	198.364	198.364
5	193.176	197.449	199.585	201.721	199.28	203.247	200.195	200.806	196.228	198.669	198.364
5.1	193.481	197.754	199.28	202.637	199.28	204.163	199.585	200.806	196.838	199.28	198.059
5.2	193.481	198.059	199.28	203.247	199.28	204.163	199.28	200.5	197.144	199.585	198.059
5.3	193.176	198.669	199.28	203.552	199.585	203.857	199.585	200.5	196.838	199.89	198.059
5.4	193.176	198.975	198.975	203.247	199.585	203.552	199.89	200.195	196.838	200.195	198.669
5.5	193.481	198.975	198.975	202.637	199.28	203.247	200.195	200.195	196.838	200.195	198.975
5.6	194.092	198.975	198.975	201.416	199.28	202.942	200.806	200.195	196.838	200.195	199.28
5.7	194.702	198.669	198.669	200.806	199.585	202.332	201.111	200.195	197.144	200.195	199.28
5.8	195.007	198.364	198.975	200.806	199.89	201.416	202.026	200.5	196.838	200.195	199.28
5.9	195.007	197.754	199.28	200.806	199.89	200.806	202.637	200.5	196.533	200.195	199.28
6	194.702	197.449	199.585	201.111	199.585	200.5	202.942	200.806	195.923	199.89	199.89
6.1	195.007	196.838	199.28	201.416	199.28	200.5	202.942	201.111	195.618	199.585	200.195
6.2	195.312	196.533	198.975	201.416	198.975	200.806	202.637	201.416	195.312	199.585	200.195
6.3	195.618	196.228	198.975	201.721	198.975	201.111	202.332	201.416	195.312	199.585	199.585
6.4	195.923	196.228	198.669	202.026	198.669	201.416	201.721	201.111	195.007	199.28	198.975
6.5	196.228	196.838	198.364	202.026	198.364	201.721	201.721	201.416	195.007	198.669	198.669
6.6	196.228	197.754	198.364	201.416	198.059	202.026	201.721	201.416	194.702	198.364	199.28
6.7	196.533	198.059	198.669	200.806	197.754	202.026	201.721	201.416	194.702	198.364	199.89
6.8	195.923	197.754	198.975	200.195	198.059	202.026	201.721	202.026	194.702	198.364	200.195
6.9	195.618	197.144	198.975	199.89	198.364	202.026	201.416	202.637	194.702	197.754	200.5
7	195.618	197.144	198.975	200.195	198.364	202.332	201.416	203.247	194.702	197.754	200.5
7.1	195.618	197.144	199.28	200.806	198.669	202.332	201.416	203.552	194.397	198.059	200.806
7.2	195.618	197.144	199.28	201.416	198.975	202.026	201.721	203.247	194.092	198.669	200.5
7.3	195.312	197.449	199.28	201.721	199.28	202.026	201.721	202.942	193.787	199.28	199.585
7.4	195.007	197.754	199.585	201.416	199.89	202.332	201.416	202.637	193.481	199.28	198.669
7.5	194.397	198.669	199.585	200.806	200.806	202.942	201.111	202.332	193.176	198.364	198.059
7.6	194.092	198.975	199.89	200.195	201.721	203.247	200.806	202.637	192.871	197.449	197.754
7.7	194.397	198.975	199.89	199.89	201.721	203.552	201.111	202.332	193.176	197.144	197.449
7.8	194.397	198.669	200.195	200.195	201.416	203.552	201.416	201.416	193.481	197.754	197.754
7.9	194.397	198.059	200.195	200.195	200.806	203.857	201.111	200.806	194.397	198.364	198.669
8	194.092	196.838	199.89	200.5	200.806	203.857	200.806	200.5	195.312	198.975	199.28
8.1	193.481	196.228	199.89	201.111	200.806	203.552	200.5	200.5	195.923	199.28	200.195
8.2	193.481	195.923	199.585	201.721	200.5	202.942	200.195	201.111	195.923	199.585	200.5
8.3	193.787	195.923	199.585	202.026	199.89	202.637	199.585	201.721	195.923	199.585	200.806
8.4	193.787	196.228	199.89	201.416	199.28	202.637	199.28	202.026	195.618	199.28	200.5
8.5	194.092	197.144	200.195	200.5	199.28	202.637	199.28	202.026	195.618	198.975	199.89
8.6	194.702	198.059	200.806	200.195	199.89	202.332	199.28	201.721	195.923	198.364	199.28
8.7	195.312	198.364	201.111	200.5	200.195	202.026	199.585	202.026	196.228	198.059	199.28
8.8	195.923	198.059	201.416	200.5	200.5	202.026	199.89	202.332	196.228	198.364	199.28
8.9	195.618	197.144	201.721	201.111	201.111	201.721	200.195	202.637	196.228	199.585	199.585
9	195.312	196.533	202.332	201.416	201.416	201.416	200.195	202.942	195.923	200.5	199.89
9.1	195.007	196.533	202.332	202.026	202.026	201.111	199.89	202.637	195.923	201.111	199.585
9.2	195.312	197.144	201.721	202.637	202.332	201.111	199.585	202.026	195.923	201.111	198.975
9.3	195.618	198.059	201.111	202.942	202.332	201.416	199.585	201.416	195.618	200.806	198.669
9.4	195.618	198.364	200.806	202.637	202.332	201.416	200.195	201.416	195.312	200.195	198.669
9.5	195.007	198.364	200.806	202.026	202.026	201.416	200.806	201.416	195.007	199.89	198.364
9.6	194.702	198.364	200.806	201.721	201.416	201.416	200.806	201.111	195.007	199.585	197.754
9.7	194.397	198.669	200.806	200.806	200.806	201.416	200.806	200.5	195.007	199.89	197.449
9.8	194.702	198.669	200.806	200.195	200.195	201.721	200.806	199.89	195.007	199.585	197.144
9.9	194.702	198.364	200.5	200.195	200.5	202.026	200.5	199.585	195.007	199.28	197.449
10	195.312	198.059	200.195	200.195	200.195	202.026	200.195	199.28	195.007	198.975	197.449
10.1	195.618	197.449	199.89	200.5	199.89	202.026	200.195	199.89	194.702	198.669	197.754
10.2	195.618	197.144	199.28	201.111	199.585	201.721	200.195	200.5	195.007	198.669	198.059
10.3	195.312	197.144	198.669	201.416	198.975	201.416	199.89	200.806	195.312	198.669	198.669
10.4	195.618	197.449	197.754	201.721	198.364	201.111	199.585	201.111	195.312	198.364	198.975
10.5	195.923	197.754	197.449	201.416	198.059	201.111	199.28	201.111	195.312	197.754	199.28
10.6	196.228	197.754	197.449	201.111	198.059	201.721	198.975	201.111	195.007	197.144	198.975
10.7	196.228	198.059	197.754	200.806	198.364	202.332	198.669	201.111	195.007	197.449	198.975
10.8	196.228	198.364	198.059	201.111	198.669	202.332	198.059	201.111	195.007	198.364	198.669
10.9	196.533	198.669	198.364	201.416	198.975	202.332	197.754	200.806	195.007	198.975	198.364
11	196.533	198.975	198.364	201.111	199.28	201.721	197.144	200.195	195.007	199.28	198.059
11.1	196.838	199.28	198.669	201.111	199.585	201.111	196.838	199.585	195.312	199.585	198.059
11.2	196.533	199.585	199.28	200.806	199.585	200.806	196.838	199.28	195.312	200.5	197.754
11.3	195.923	199.585	200.195	200.806	199.585	200.806	196.838	199.28	195.312	201.416	198.059
11.4	195.312	199.28	200.5	200.806	199.89	201.111	197.449	199.89	195.312	202.026	198.059
11.5	194.397	199.28	200.5	201.111	200.195	201.111	197.754	200.806	195.312	202.332	198.364
11.6	194.092	199.28	200.5	201.111	200.806	201.111	197.754	201.111	195.312	202.026	198.669
11.7	194.397	199.89	200.806	201.111	200.806	201.416	197.754	200.806	195.618	201.111	198.975
11.8	194.397	200.5	201.416	201.111	200.5	201.721	197.449	200.195	195.923	200.195	199.585
11.9	194.702	200.806	202.026	201.111	200.195	201.721	197.144	200.195	195.923	199.28	199.89
12	194.702	200.195	202.026	201.416	199.89	201.416	196.838	200.806	195.923	198.669	199.89
12.1	195.007	199.585	202.026	202.026	199.89	201.111	196.533	201.416	195.923	198.364	199.89
12.2	195.007	198.669	202.026	202.942	199.89	201.111	196.533	201.721	196.228	198.364	199.89
12.3	195.312	198.059	202.026	203.552	199.89	201.416	196.533	201.416	196.533	198.975	200.195
12.4	195.312	197.754	201.721	204.163	199.585	201.721	196.533	200.806	196.838	199.585	199.89
12.5	195.312	197.754	200.806	204.468	198.975	202.026	197.144	200.195	196.838	199.585	200.195
12.6	194.702	197.754	200.195	204.468	198.364	202.026	197.144	199.585	196.838	199.585	200.195
12.7	194.397	197.754	199.585	204.163	197.754	202.332	197.144	199.28	196.533	198.975	200.195
12.8	194.092	197.754	199.585	203.552	197.754	202.026	196.838	198.975	196.228	198.669	200.195
12.9	194.092	198.059	199.28	202.942	197.754	201.721	196.533	199.28	196.228	198.059	200.195
13	193.787	198.364	199.585	202.942	198.059	201.416	196.228	200.195	196.533	197.754	200.5
13.1	193.176	198.364	199.585	203.247	198.364	201.111	196.228	200.5	196.838	197.754	200.806
13.2	192.261	198.669	199.89	203.552	198.059	201.416	195.923	200.806	196.838	197.754	201.111
13.3	191.956	198.364	199.89	203.552	198.059	201.416	196.228	201.111	197.144	198.059	201.111
13.4	191.956	198.059	199.585	203.552	198.059	201.111	196.533	201.111	197.449	198.669	200.806
13.5	192.261	198.059	199.28	203.857	198.059	201.111	196.533	201.111	198.059	199.28	200.806
13.6	192.566	198.364	198.975	204.163	198.669	201.416	196.838	200.806	198.975	198.975	200.806
13.7	193.176	198.975	198.669	203.857	199.28	201.416	197.754	200.5	199.585	198.364	200.5
13.8	193.481	199.585	198.669	203.857	199.89	201.111	198.364	199.89	199.585	197.754	200.5
13.9	193.481	200.195	198.669	203.857	200.195	201.111	198.975	199.585	199.28	197.449	200.195
14	193.176	200.5	198.364	204.163	200.195	201.721	199.28	199.28	198.669	197.144	200.195
14.1	192.871	199.89	198.364	204.163	199.89	202.026	199.28	199.585	197.754	197.144	200.195
14.2	192.871	199.585	198.059	204.468	199.585	202.332	199.28	199.89	197.144	197.449	200.806
14.3	193.176	198.975	198.059	204.468	199.585	202.332	199.28	200.195	196.533	198.059	201.111
14.4	193.481	198.975	197.754	204.468	199.585	202.332	199.28	200.195	196.228	198.059	200.806
14.5	193.787	198.975	197.754	204.163	199.28	202.332	198.975	200.5	195.923	198.059	199.89
14.6	194.397	198.975	198.364	203.857	198.669	202.637	198.975	201.111	195.618	197.754	199.585
14.7	194.702	198.364	198.364	203.552	198.364	202.942	199.28	201.416	195.312	197.449	199.89
14.8	195.007	197.754	198.059	203.857	198.059	203.247	199.585	201.721	195.007	197.754	200.195
14.9	195.312	197.449	197.754	204.163	197.754	203.247	199.585	201.721	195.007	198.059	200.195
15	195.312	198.059	197.754	204.468	198.059	203.552	198.975	201.416	195.312	198.364	200.195
15.1	195.618	198.669	198.059	204.468	198.059	203.552	198.669	201.416	195.618	198.059	200.195
15.2	195.923	199.585	198.364	204.773	198.364	203.247	198.364	201.721	195.312	198.059	200.195
15.3	196.228	199.585	198.669	205.383	198.364	202.637	198.059	201.721	195.312	198.364	200.5
15.4	195.923	199.28	198.975	205.994	198.364	202.637	198.059	201.416	195.618	198.975	201.111
15.5	195.923	198.975	198.975	206.299	198.669	202.942	198.364	200.806	195.923	199.585	201.111
15.6	195.923	198.975	198.669	205.994	198.975	203.247	198.669	200.195	196.228	199.89	201.111
15.7	196.228	198.975	198.669	205.688	199.28	203.552	198.975	200.195	196.838	200.195	200.806
15.8	196.533	199.28	198.975	205.383	199.28	203.552	198.975	200.195	197.144	200.195	200.5
15.9	196.533	199.28	199.28	204.773	199.585	203.552	198.975	200.5	197.144	200.195	200.5
16	196.228	199.585	199.28	204.163	200.195	203.552	198.975	200.806	196.838	200.195	200.195
16.1	195.923	199.28	199.28	203.857	200.806	203.552	198.669	200.5	196.838	200.5	199.89
16.2	195.923	198.975	198.669	203.857	201.111	203.552	198.059	200.5	197.449	200.5	199.89
16.3	196.228	198.669	197.754	203.552	201.416	203.857	197.144	200.806	197.754	199.89	200.195
16.4	195.923	198.364	196.533	203.552	201.721	203.552	196.838	201.111	197.754	199.585	200.5
16.5	195.618	198.669	195.618	203.552	202.026	202.637	196.838	201.416	198.059	199.585	200.806
16.6	195.007	198.669	195.312	203.552	201.416	202.332	197.449	201.416	198.059	199.585	200.5
16.7	194.702	198.669	195.923	203.247	200.806	202.332	197.449	201.416	198.669	199.28	200.5
16.8	195.007	198.975	196.838	203.247	200.806	202.942	197.449	202.026	199.28	198.975	200.806
16.9	194.702	199.28	197.449	203.552	200.5	203.552	198.364	202.942	199.585	198.975	201.111
17	194.397	199.28	197.754	203.552	199.89	203.552	199.28	203.552	198.975	198.975	201.111
17.1	194.397	199.28	198.364	203.552	199.28	203.247	199.89	203.552	198.364	198.975	201.111
17.2	194.397	199.585	198.975	203.247	198.364	202.942	199.89	203.247	198.059	198.975	200.806
17.3	194.702	200.5	198.975	203.247	197.449	202.637	199.28	202.942	198.059	198.669	200.195
17.4	195.618	200.806	198.364	203.247	197.144	202.942	198.364	202.637	197.754	198.059	199.89
17.5	196.228	200.195	197.449	203.552	197.754	202.942	197.754	202.332	197.449	197.754	200.195
17.6	196.228	199.28	196.838	204.163	198.364	202.332	197.144	201.416	197.449	198.059	200.5
17.7	195.923	198.669	196.838	204.468	198.975	202.332	196.838	200.806	198.059	198.669	200.5
17.8	195.618	198.669	197.144	204.773	198.975	202.637	196.838	200.195	198.364	199.28	199.89
17.9	195.618	198.975	197.449	204.468	198.975	203.552	196.533	200.195	198.364	199.89	199.28
18	195.007	198.975	198.059	203.857	198.975	203.857	196.533	200.195	198.364	200.195	198.669
18.1	195.007	198.669	198.059	203.552	198.669	203.857	196.533	200.5	198.669	200.5	198.059
18.2	194.702	198.364	198.364	203.247	198.364	203.552	196.533	200.5	198.669	200.195	197.754
18.3	194.702	198.364	198.059	203.247	197.449	203.247	196.838	200.5	198.669	199.89	197.754
18.4	194.702	198.975	197.754	203.857	197.144	202.942	197.754	200.806	199.28	199.28	197.144
18.5	195.007	198.975	197.449	204.163	197.144	202.637	198.669	200.5	200.195	198.669	196.838
18.6	195.923	198.975	197.449	204.163	197.144	202.332	199.585	199.585	201.111	198.669	196.838
18.7	196.228	198.975	198.059	204.163	197.449	202.332	199.89	198.975	201.416	198.975	197.144
18.8	196.533	198.975	198.364	203.857	197.754	202.637	200.195	198.669	201.416	199.28	198.059
18.9	196.533	199.28	197.754	203.552	198.059	202.942	200.195	198.975	201.111	199.585	198.669
19	195.923	199.585	197.449	203.552	198.364	203.247	200.195	199.585	200.806	199.89	198.669
19.1	195.618	199.89	197.144	203.247	198.975	202.942	200.5	199.89	200.806	200.5	198.364
19.2	195.312	199.585	197.449	203.247	198.975	202.332	200.5	199.89	200.5	200.806	197.754
19.3	195.007	198.975	198.059	203.552	199.28	201.721	200.5	199.585	200.195	201.111	197.449
19.4	195.007	198.669	198.669	203.857	199.28	201.111	200.806	198.975	200.195	201.111	196.838
19.5	195.007	198.364	198.975	204.163	199.28	200.5	201.111	198.669	200.5	201.721	196.533
19.6	195.618	198.364	199.28	204.773	199.28	199.89	201.416	198.975	200.5	202.026	196.228
19.7	195.923	198.364	199.89	205.383	199.28	199.89	201.416	199.585	199.89	202.026	196.228
19.8	195.923	198.059	200.195	205.688	199.28	199.89	201.721	200.5	199.28	202.026	196.228
19.9	195.618	197.754	200.5	205.994	199.585	199.89	202.026	201.416	198.364	201.721	196.228
20	195.007	197.449	200.195	205.688	199.89	200.195	202.332	201.721	197.754	201.721	196.533
20.1	194.397	197.449	199.28	205.078	199.89	200.5	202.026	201.721	197.449	201.416	197.144
20.2	194.397	197.449	198.364	204.468	199.585	200.5	202.026	201.416	197.754	201.416	197.754
20.3	194.397	197.144	198.059	204.163	199.585	200.5	201.721	201.111	198.669	201.111	198.059
20.4	194.092	196.533	198.059	203.857	199.28	200.5	201.111	200.5	199.28	201.111	198.669
20.5	193.481	196.228	198.669	203.857	199.28	200.5	200.5	200.195	199.28	201.111	198.975
20.6	192.871	195.618	199.585	203.552	199.585	200.806	200.5	199.89	198.669	201.721	199.28
20.7	192.566	195.618	200.195	203.857	199.89	201.416	200.195	199.89	197.754	202.332	199.585
20.8	192.871	195.618	200.5	203.857	200.195	201.721	200.5	199.89	197.754	202.942	199.89
20.9	193.481	195.618	200.5	203.857	200.195	201.721	200.5	200.195	198.364	202.942	199.89
21	194.092	195.312	199.89	204.163	200.195	201.416	201.416	200.806	199.28	202.332	199.585
21.1	194.397	195.312	199.89	205.078	199.89	200.806	202.332	201.416	199.585	201.416	198.975
21.2	194.397	195.618	199.585	205.994	199.585	200.5	202.332	201.721	199.585	200.806	198.364
21.3	194.092	195.923	199.585	205.688	199.585	200.5	202.026	201.721	199.585	200.195	198.059
21.4	193.787	196.533	199.89	205.078	199.28	201.111	201.721	201.416	199.28	199.89	198.059
21.5	194.092	196.838	200.195	204.468	199.28	201.416	201.416	200.806	199.28	200.195	198.059
21.6	194.397	196.533	200.5	203.857	198.975	201.416	201.111	200.195	198.975	200.5	198.059
21.7	195.007	196.533	200.806	203.857	198.975	201.111	200.806	199.89	198.669	200.806	198.059
[truncated: 1,783 more rows]

## Sheet: figureA_IV
voltage (mV)	Cs+int/Na+ext	+ 2 mM AP-6	recovery
[truncated: 11 more rows]

## Sheet: figureB_CsNa
Time (ms)	Im_scaled (nA)	Im_scaled (nA)	Im_scaled (nA)	Im_scaled (nA)	Im_scaled (pA)	Im_scaled (pA)	Im_scaled (pA)	Im_scaled (nA)	Im_scaled (nA)	Im_scaled (nA)	Im_scaled (nA)
[truncated: 2,000 more rows]

[truncated: 8 more sheets: figureB_AP6, figureB_washout, figureB_IV, figureC_CsNa, figureC_AP6, figureC_washout, figureC_IV, figureE]
